# Supplementary material for: Exploring the Interaction of Pyridine-Based Chalcones with Trinuclear Silver(I) Pyrazolate Complex
Source: MDPI journal article supplement (doi:10.3390/inorganics11040175), 2023-04-21
Supplement: s1 [file s1]

Archive with 7 entries (7 files):
- E-1Ag_cifreport.pdf
- E-1Ag.cif
- SI.pdf
- E-2Ag_cifreport-1.pdf
- Z-1Ag_cifreport.pdf
- z-1Ag.cif
- E-2Ag.cif
