# Supplementary material for: Exploring the Interaction of Pyridine-Based Chalcones with Trinuclear Silver(I) Pyrazolate Complex
Source: MDPI journal article supplement (doi:10.3390/inorganics11040175), 2023-04-21
Supplement: s1 [file s1 › E-1Ag.cif]

data_a
_audit_creation_date               2023-04-11
_audit_creation_method
;
Olex2 1.5
(compiled 2023.03.06 svn.rbb2c1857 for OlexSys, GUI svn.r6748)
;
_shelx_SHELXL_version_number       '2018/3'
_audit_contact_author_address      ?
_audit_contact_author_email        ?
_audit_contact_author_name         ''
_audit_contact_author_phone        ?
_publ_contact_author_id_orcid      ?
_publ_section_references
;
Dolomanov, O.V., Bourhis, L.J., Gildea, R.J, Howard, J.A.K. & Puschmann, H.
 (2009), J. Appl. Cryst. 42, 339-341.

Sheldrick, G.M. (2008). Acta Cryst. A64, 112-122.

Sheldrick, G.M. (2015). Acta Cryst. A71, 3-8.
;
_chemical_name_common              ?
_chemical_name_systematic          ?
_chemical_formula_moiety           'C15 H3 Ag3 F18 N6, C22 H15 N O'
_chemical_formula_sum              'C37 H18 Ag3 F18 N7 O'
_chemical_formula_weight           1242.19
_chemical_absolute_configuration   ad
_chemical_melting_point            ?
loop_
  _atom_type_symbol
  _atom_type_description
  _atom_type_scat_dispersion_real
  _atom_type_scat_dispersion_imag
  _atom_type_scat_source
 'C' 'C' 0.0033 0.0016 'International Tables Vol C Tables 4.2.6.8 and 6.1.1.4'
 'H' 'H' 0.0000 0.0000 'International Tables Vol C Tables 4.2.6.8 and 6.1.1.4'
 'Ag' 'Ag' -0.8971 1.1015
 'International Tables Vol C Tables 4.2.6.8 and 6.1.1.4'
 'F' 'F' 0.0171 0.0103 'International Tables Vol C Tables 4.2.6.8 and 6.1.1.4'
 'N' 'N' 0.0061 0.0033 'International Tables Vol C Tables 4.2.6.8 and 6.1.1.4'
 'O' 'O' 0.0106 0.0060 'International Tables Vol C Tables 4.2.6.8 and 6.1.1.4'

_shelx_space_group_comment
;
The symmetry employed for this shelxl refinement is uniquely defined
by the following loop, which should always be used as a source of
symmetry information in preference to the above space-group names.
They are only intended as comments.
;
_space_group_crystal_system        'triclinic'
_space_group_IT_number             1
_space_group_name_H-M_alt          'P 1'
_space_group_name_Hall             'P 1'
loop_
  _space_group_symop_operation_xyz
 'x, y, z'

_cell_length_a                     7.8326(2)
_cell_length_b                     11.0556(2)
_cell_length_c                     12.8446(3)
_cell_angle_alpha                  114.7540(10)
_cell_angle_beta                   102.7180(10)
_cell_angle_gamma                  94.9140(10)
_cell_volume                       965.22(4)
_cell_formula_units_Z              1
_cell_measurement_reflns_used      9976
_cell_measurement_temperature      100
_cell_measurement_theta_max        29.66
_cell_measurement_theta_min        2.72
_shelx_estimated_absorpt_T_max     0.880
_shelx_estimated_absorpt_T_min     0.695
_exptl_absorpt_coefficient_mu      1.638
_exptl_absorpt_correction_T_max    0.3803
_exptl_absorpt_correction_T_min    0.3168
_exptl_absorpt_correction_type     multi-scan
_exptl_absorpt_process_details
;
SADABS-2016/2 (Bruker,2016/2) was used for absorption correction.
wR2(int) was 0.0767 before and 0.0365 after correction.
The Ratio of minimum to maximum transmission is 0.8330.
The \l/2 correction factor is Not present.
;
_exptl_absorpt_special_details     ?
_exptl_crystal_colour              orange
_exptl_crystal_colour_primary      orange
_exptl_crystal_density_diffrn      2.137
_exptl_crystal_density_meas        ?
_exptl_crystal_density_method      ?
_exptl_crystal_description         prism
_exptl_crystal_F_000               600
_exptl_crystal_size_max            0.24
_exptl_crystal_size_mid            0.17
_exptl_crystal_size_min            0.08
_exptl_transmission_factor_max     ?
_exptl_transmission_factor_min     ?
_diffrn_reflns_av_R_equivalents    0.0170
_diffrn_reflns_av_unetI/netI       0.0306
_diffrn_reflns_Laue_measured_fraction_full  0.996
_diffrn_reflns_Laue_measured_fraction_max  0.996
_diffrn_reflns_limit_h_max         9
_diffrn_reflns_limit_h_min         -9
_diffrn_reflns_limit_k_max         10
_diffrn_reflns_limit_k_min         -13
_diffrn_reflns_limit_l_max         15
_diffrn_reflns_limit_l_min         -15
_diffrn_reflns_number              9600
_diffrn_reflns_point_group_measured_fraction_full  0.711
_diffrn_reflns_point_group_measured_fraction_max  0.707
_diffrn_reflns_theta_full          25.242
_diffrn_reflns_theta_max           25.998
_diffrn_reflns_theta_min           2.051
_diffrn_ambient_temperature        100
_diffrn_detector_area_resol_mean   ?
_diffrn_measured_fraction_theta_full  0.996
_diffrn_measured_fraction_theta_max  0.996
_diffrn_measurement_device_type    'Bruker APEX-II CCD'
_diffrn_measurement_method         '\f and \w scans'
_diffrn_radiation_type             MoK\a
_diffrn_radiation_wavelength       0.71073
_diffrn_source                     ?
_diffrn_source_current             1.4
_diffrn_source_power               0.07
_diffrn_source_voltage             50.0
_diffrn_standards_number           0
_reflns_Friedel_coverage           0.420
_reflns_Friedel_fraction_full      0.426
_reflns_Friedel_fraction_max       0.418
_reflns_number_gt                  5326
_reflns_number_total               5359
_reflns_special_details
;
 Reflections were merged by SHELXL according to the crystal
 class for the calculation of statistics and refinement.
 
 _reflns_Friedel_fraction is defined as the number of unique
 Friedel pairs measured divided by the number that would be
 possible theoretically, ignoring centric projections and
 systematic absences.
;
_reflns_threshold_expression       'I > 2\s(I)'
_computing_cell_refinement         'SAINT V8.40A (Bruker, 2019)'
_computing_data_collection         ?
_computing_data_reduction          'SAINT V8.40A (Bruker, 2019)'
_computing_molecular_graphics      'Olex2 1.5 (Dolomanov et al., 2009)'
_computing_publication_material    'Olex2 1.5 (Dolomanov et al., 2009)'
_computing_structure_refinement    'XL  (Sheldrick, 2008)'
_computing_structure_solution      'SHELXT 2014/5 (Sheldrick, 2014)'
_refine_diff_density_max           0.441
_refine_diff_density_min           -0.345
_refine_diff_density_rms           0.054
_refine_ls_abs_structure_details
;
 Flack x determined using 1552 quotients [(I+)-(I-)]/[(I+)+(I-)]
 (Parsons, Flack and Wagner, Acta Cryst. B69 (2013) 249-259).
;
_refine_ls_abs_structure_Flack     0.004(9)
_refine_ls_extinction_coef         .
_refine_ls_extinction_method       none
_refine_ls_goodness_of_fit_ref     1.037
_refine_ls_hydrogen_treatment      constr
_refine_ls_matrix_type             full
_refine_ls_number_parameters       595
_refine_ls_number_reflns           5359
_refine_ls_number_restraints       3
_refine_ls_R_factor_all            0.0155
_refine_ls_R_factor_gt             0.0153
_refine_ls_restrained_S_all        1.037
_refine_ls_shift/su_max            0.001
_refine_ls_shift/su_mean           0.000
_refine_ls_structure_factor_coef   Fsqd
_refine_ls_weighting_details      
 'w=1/[\s^2^(Fo^2^)+(0.0150P)^2^] where P=(Fo^2^+2Fc^2^)/3'
_refine_ls_weighting_scheme        calc
_refine_ls_wR_factor_gt            0.0367
_refine_ls_wR_factor_ref           0.0368
_refine_special_details            ?
_olex2_refinement_description
;
1. Fixed Uiso
 At 1.2 times of:
  All C(H) groups
2.a Aromatic/amide H refined with riding coordinates:
 C2(H2), C7(H7), C12(H12), C17(H17), C18(H18), C21(H21), C22(H22), C23(H23),
 C24(H24), C26(H26), C28(H28), C29(H29), C30(H30), C31(H31), C34(H34), C35(H35),
  C36(H36), C37(H37)
;
_atom_sites_solution_hydrogens     geom
_atom_sites_solution_primary       dual
_atom_sites_solution_secondary     ?
loop_
  _atom_site_label
  _atom_site_type_symbol
  _atom_site_fract_x
  _atom_site_fract_y
  _atom_site_fract_z
  _atom_site_U_iso_or_equiv
  _atom_site_adp_type
  _atom_site_occupancy
  _atom_site_site_symmetry_order
  _atom_site_calc_flag
  _atom_site_refinement_flags_posn
  _atom_site_refinement_flags_adp
  _atom_site_refinement_flags_occupancy
  _atom_site_disorder_assembly
  _atom_site_disorder_group
 Ag1 Ag 0.70688(3) 0.68056(2) 0.49329(2) 0.01805(6) Uani 1 1 d . . . . .
 Ag2 Ag 0.71378(3) 0.50290(2) 0.65897(2) 0.01763(6) Uani 1 1 d . . . . .
 Ag3 Ag 0.42629(3) 0.36656(2) 0.36592(2) 0.01881(6) Uani 1 1 d . . . . .
 F1 F 0.8932(4) 1.0446(3) 0.6989(3) 0.0432(6) Uani 1 1 d . . . . .
 F2 F 1.0192(3) 0.9269(2) 0.5686(2) 0.0310(5) Uani 1 1 d . . . . .
 F3 F 1.1778(3) 1.0704(2) 0.7456(2) 0.0380(6) Uani 1 1 d . . . . .
 F4 F 1.1810(4) 0.7826(3) 1.0148(2) 0.0465(7) Uani 1 1 d . . . . .
 F5 F 1.2212(3) 0.6078(3) 0.8732(2) 0.0367(6) Uani 1 1 d . . . . .
 F6 F 0.9685(3) 0.6084(3) 0.9073(2) 0.0348(6) Uani 1 1 d . . . . .
 F7 F 0.5021(4) 0.3839(3) 0.8324(2) 0.0509(8) Uani 1 1 d . . . . .
 F8 F 0.7439(3) 0.3283(3) 0.7945(2) 0.0435(7) Uani 1 1 d . . . . .
 F9 F 0.5417(4) 0.1824(3) 0.7903(2) 0.0445(7) Uani 1 1 d . . . . .
 F10 F 0.0959(3) 0.0987(3) 0.2813(2) 0.0440(7) Uani 1 1 d . . . . .
 F11 F 0.1648(4) -0.0712(3) 0.3090(2) 0.0518(8) Uani 1 1 d . . . . .
 F12 F 0.3275(3) 0.0279(3) 0.24298(19) 0.0359(6) Uani 1 1 d . . . . .
 F13 F 0.1494(3) 0.3070(3) -0.0313(2) 0.0433(7) Uani 1 1 d . . . . .
 F14 F 0.1475(3) 0.2563(3) 0.1127(2) 0.0374(6) Uani 1 1 d . . . . .
 F15 F 0.3541(3) 0.2130(2) 0.0261(2) 0.0373(6) Uani 1 1 d . . . . .
 F16 F 0.5447(3) 0.8281(2) 0.1903(2) 0.0372(6) Uani 1 1 d . . . . .
 F17 F 0.7746(3) 0.8152(3) 0.3090(3) 0.0452(7) Uani 1 1 d . . . . .
 F18 F 0.5529(4) 0.8810(2) 0.3723(2) 0.0350(6) Uani 1 1 d . . . . .
 N1 N 0.8912(4) 0.7568(3) 0.6622(3) 0.0173(6) Uani 1 1 d . . . . .
 N2 N 0.9086(4) 0.6802(3) 0.7212(2) 0.0164(6) Uani 1 1 d . . . . .
 N3 N 0.5103(4) 0.3292(3) 0.5894(2) 0.0173(6) Uani 1 1 d . . . . .
 N4 N 0.4190(4) 0.2675(3) 0.4714(3) 0.0173(6) Uani 1 1 d . . . . .
 N5 N 0.4407(4) 0.4708(3) 0.2648(2) 0.0176(6) Uani 1 1 d . . . . .
 N6 N 0.5333(4) 0.6003(3) 0.3204(3) 0.0173(6) Uani 1 1 d . . . . .
 C1 C 1.0184(4) 0.8712(4) 0.7261(3) 0.0175(7) Uani 1 1 d . . . . .
 C2 C 1.1203(4) 0.8697(4) 0.8284(3) 0.0198(7) Uani 1 1 d . . . . .
 H2 H 1.217875 0.937137 0.889269 0.024 Uiso 1 1 calc R U . . .
 C3 C 1.0473(4) 0.7481(4) 0.8214(3) 0.0174(7) Uani 1 1 d . . . . .
 C4 C 1.0277(5) 0.9777(4) 0.6861(3) 0.0241(8) Uani 1 1 d . . . . .
 C5 C 1.1039(5) 0.6876(4) 0.9035(3) 0.0229(8) Uani 1 1 d . . . . .
 C6 C 0.4845(4) 0.2408(3) 0.6335(3) 0.0183(7) Uani 1 1 d . . . . .
 C7 C 0.3763(4) 0.1188(4) 0.5453(3) 0.0200(7) Uani 1 1 d . . . . .
 H7 H 0.337314 0.039112 0.551776 0.024 Uiso 1 1 calc R U . . .
 C8 C 0.3393(4) 0.1417(4) 0.4457(3) 0.0181(7) Uani 1 1 d . . . . .
 C9 C 0.5659(5) 0.2826(4) 0.7621(3) 0.0223(7) Uani 1 1 d . . . . .
 C10 C 0.2318(5) 0.0492(4) 0.3211(3) 0.0228(8) Uani 1 1 d . . . . .
 C11 C 0.3617(4) 0.4421(4) 0.1497(3) 0.0203(7) Uani 1 1 d . . . . .
 C12 C 0.4030(4) 0.5539(4) 0.1304(3) 0.0204(7) Uani 1 1 d . . . . .
 H12 H 0.365677 0.562401 0.058665 0.025 Uiso 1 1 calc R U . . .
 C13 C 0.5114(4) 0.6500(4) 0.2406(3) 0.0177(7) Uani 1 1 d . . . . .
 C14 C 0.2534(5) 0.3054(4) 0.0645(3) 0.0244(8) Uani 1 1 d . . . . .
 C15 C 0.5956(5) 0.7927(4) 0.2776(3) 0.0214(7) Uani 1 1 d . . . . .
 O1 O 0.4597(4) 0.8724(3) 0.6511(2) 0.0337(7) Uani 1 1 d . . . . .
 N7 N 0.5661(4) 0.7209(3) 0.8436(3) 0.0235(6) Uani 1 1 d . . . . .
 C16 C 0.4607(5) 0.7870(4) 0.6868(3) 0.0204(8) Uani 1 1 d . . . . .
 C17 C 0.3462(5) 0.6485(4) 0.6156(3) 0.0209(8) Uani 1 1 d . . . . .
 H17 H 0.372033 0.575676 0.633342 0.025 Uiso 1 1 calc R U . . .
 C18 C 0.2052(4) 0.6299(4) 0.5254(3) 0.0192(7) Uani 1 1 d . . . . .
 H18 H 0.192549 0.709419 0.515398 0.023 Uiso 1 1 calc R U . . .
 C19 C 0.0676(5) 0.5104(4) 0.4396(3) 0.0184(8) Uani 1 1 d . . . . .
 C20 C -0.0049(4) 0.5046(4) 0.3256(3) 0.0183(7) Uani 1 1 d . . . . .
 C21 C 0.0598(5) 0.6032(4) 0.2915(3) 0.0215(8) Uani 1 1 d . . . . .
 H21 H 0.154869 0.676737 0.347295 0.026 Uiso 1 1 calc R U . . .
 C22 C -0.0110(5) 0.5949(4) 0.1813(3) 0.0236(8) Uani 1 1 d . . . . .
 H22 H 0.034197 0.662820 0.161802 0.028 Uiso 1 1 calc R U . . .
 C23 C -0.1518(5) 0.4855(4) 0.0953(3) 0.0265(8) Uani 1 1 d . . . . .
 H23 H -0.200616 0.480314 0.018592 0.032 Uiso 1 1 calc R U . . .
 C24 C -0.2161(5) 0.3889(4) 0.1226(3) 0.0243(8) Uani 1 1 d . . . . .
 H24 H -0.309569 0.315614 0.064262 0.029 Uiso 1 1 calc R U . . .
 C25 C -0.1468(4) 0.3945(4) 0.2375(3) 0.0195(7) Uani 1 1 d . . . . .
 C26 C -0.2112(4) 0.2941(4) 0.2657(3) 0.0208(7) Uani 1 1 d . . . . .
 H26 H -0.306312 0.221973 0.207595 0.025 Uiso 1 1 calc R U . . .
 C27 C -0.1414(4) 0.2954(4) 0.3759(3) 0.0204(7) Uani 1 1 d . . . . .
 C28 C -0.2081(5) 0.1894(4) 0.3997(4) 0.0253(8) Uani 1 1 d . . . . .
 H28 H -0.301501 0.117174 0.339800 0.030 Uiso 1 1 calc R U . . .
 C29 C -0.1406(5) 0.1891(4) 0.5070(4) 0.0289(9) Uani 1 1 d . . . . .
 H29 H -0.184349 0.116281 0.521314 0.035 Uiso 1 1 calc R U . . .
 C30 C -0.0052(5) 0.2984(4) 0.5962(3) 0.0279(8) Uani 1 1 d . . . . .
 H30 H 0.039874 0.299564 0.671717 0.033 Uiso 1 1 calc R U . . .
 C31 C 0.0628(5) 0.4021(4) 0.5772(3) 0.0226(8) Uani 1 1 d . . . . .
 H31 H 0.153895 0.474126 0.639711 0.027 Uiso 1 1 calc R U . . .
 C32 C 0.0002(5) 0.4053(4) 0.4650(3) 0.0190(7) Uani 1 1 d . . . . .
 C33 C 0.5760(4) 0.8197(4) 0.8093(3) 0.0184(7) Uani 1 1 d . . . . .
 C34 C 0.6828(5) 0.9477(4) 0.8804(3) 0.0239(8) Uani 1 1 d . . . . .
 H34 H 0.688115 1.013931 0.851621 0.029 Uiso 1 1 calc R U . . .
 C35 C 0.7827(5) 0.9767(4) 0.9954(3) 0.0288(9) Uani 1 1 d . . . . .
 H35 H 0.857586 1.063424 1.046947 0.035 Uiso 1 1 calc R U . . .
 C36 C 0.7701(5) 0.8771(4) 1.0325(3) 0.0293(9) Uani 1 1 d . . . . .
 H36 H 0.835069 0.894141 1.110674 0.035 Uiso 1 1 calc R U . . .
 C37 C 0.6611(5) 0.7511(4) 0.9539(3) 0.0279(8) Uani 1 1 d . . . . .
 H37 H 0.653941 0.682909 0.980281 0.033 Uiso 1 1 calc R U . . .

loop_
  _atom_site_aniso_label
  _atom_site_aniso_U_11
  _atom_site_aniso_U_22
  _atom_site_aniso_U_33
  _atom_site_aniso_U_23
  _atom_site_aniso_U_13
  _atom_site_aniso_U_12
 Ag1 0.01853(12) 0.01794(13) 0.01357(12) 0.00636(11) -0.00053(9) 0.00054(10)
 Ag2 0.01651(12) 0.01484(12) 0.01711(13) 0.00701(10) -0.00104(9) -0.00258(9)
 Ag3 0.02091(13) 0.01664(13) 0.01596(13) 0.00718(11) 0.00103(9) 0.00109(10)
 F1 0.0495(16) 0.0406(14) 0.0664(18) 0.0390(14) 0.0309(13) 0.0242(12)
 F2 0.0470(14) 0.0256(12) 0.0187(11) 0.0121(10) 0.0056(10) -0.0027(10)
 F3 0.0469(15) 0.0252(12) 0.0325(13) 0.0129(11) 0.0020(11) -0.0149(11)
 F4 0.0701(18) 0.0335(14) 0.0157(11) 0.0078(11) -0.0136(11) -0.0047(13)
 F5 0.0349(13) 0.0554(16) 0.0366(13) 0.0320(13) 0.0135(10) 0.0235(12)
 F6 0.0257(12) 0.0497(16) 0.0386(14) 0.0330(13) 0.0037(10) -0.0008(11)
 F7 0.077(2) 0.0526(17) 0.0197(12) 0.0097(12) 0.0120(12) 0.0355(15)
 F8 0.0297(13) 0.0630(19) 0.0259(13) 0.0198(13) -0.0050(10) -0.0150(12)
 F9 0.0559(16) 0.0390(14) 0.0340(14) 0.0262(12) -0.0075(11) -0.0120(12)
 F10 0.0256(13) 0.0473(16) 0.0320(14) -0.0018(12) -0.0066(10) 0.0174(12)
 F11 0.0688(18) 0.0252(13) 0.0360(14) 0.0088(12) -0.0100(13) -0.0251(13)
 F12 0.0251(11) 0.0423(14) 0.0197(11) -0.0021(11) 0.0018(9) 0.0026(10)
 F13 0.0422(14) 0.0434(16) 0.0224(12) 0.0072(11) -0.0132(10) -0.0003(12)
 F14 0.0296(13) 0.0361(15) 0.0322(14) 0.0066(12) 0.0067(10) -0.0113(11)
 F15 0.0283(12) 0.0234(12) 0.0397(14) -0.0025(11) 0.0068(10) 0.0005(9)
 F16 0.0552(16) 0.0322(13) 0.0307(13) 0.0211(11) 0.0112(11) 0.0055(12)
 F17 0.0203(12) 0.0290(13) 0.080(2) 0.0231(14) 0.0060(12) 0.0007(10)
 F18 0.0567(16) 0.0204(12) 0.0297(12) 0.0092(10) 0.0201(11) 0.0075(11)
 N1 0.0168(14) 0.0159(15) 0.0163(14) 0.0063(12) 0.0023(11) 0.0000(11)
 N2 0.0149(14) 0.0193(15) 0.0117(14) 0.0061(12) 0.0007(10) 0.0003(11)
 N3 0.0188(14) 0.0152(14) 0.0156(14) 0.0069(12) 0.0018(10) 0.0006(11)
 N4 0.0160(14) 0.0152(15) 0.0149(13) 0.0037(12) 0.0009(10) 0.0001(11)
 N5 0.0162(14) 0.0176(14) 0.0160(14) 0.0070(12) 0.0002(11) 0.0027(11)
 N6 0.0186(14) 0.0168(15) 0.0154(14) 0.0066(12) 0.0036(11) 0.0039(11)
 C1 0.0169(16) 0.0174(17) 0.0164(17) 0.0062(14) 0.0052(13) 0.0004(13)
 C2 0.0170(17) 0.0207(18) 0.0160(16) 0.0046(14) 0.0033(13) -0.0024(14)
 C3 0.0158(16) 0.0200(17) 0.0117(15) 0.0045(14) 0.0016(12) 0.0005(13)
 C4 0.028(2) 0.0222(19) 0.0190(18) 0.0076(16) 0.0058(14) -0.0002(15)
 C5 0.0204(17) 0.0278(19) 0.0163(16) 0.0093(15) 0.0007(13) -0.0019(14)
 C6 0.0171(16) 0.0166(17) 0.0190(18) 0.0076(15) 0.0027(13) 0.0016(13)
 C7 0.0206(17) 0.0151(17) 0.0222(18) 0.0077(15) 0.0063(13) -0.0027(14)
 C8 0.0158(16) 0.0140(17) 0.0174(17) 0.0023(15) 0.0020(13) 0.0006(13)
 C9 0.0245(18) 0.0203(18) 0.0207(18) 0.0106(15) 0.0034(14) -0.0020(14)
 C10 0.0177(17) 0.0195(19) 0.0219(19) 0.0047(16) -0.0010(14) 0.0000(14)
 C11 0.0161(16) 0.024(2) 0.0153(16) 0.0057(15) 0.0017(13) 0.0027(14)
 C12 0.0186(17) 0.0273(19) 0.0164(17) 0.0117(15) 0.0028(13) 0.0054(14)
 C13 0.0184(16) 0.0194(18) 0.0175(17) 0.0092(15) 0.0071(13) 0.0051(14)
 C14 0.0185(17) 0.025(2) 0.0184(18) 0.0031(16) -0.0001(13) -0.0012(14)
 C15 0.0202(17) 0.0243(19) 0.0226(18) 0.0122(16) 0.0069(14) 0.0072(14)
 O1 0.0368(16) 0.0266(15) 0.0304(15) 0.0154(13) -0.0050(12) -0.0062(12)
 N7 0.0191(15) 0.0276(17) 0.0192(15) 0.0084(14) 0.0035(11) -0.0013(12)
 C16 0.0190(17) 0.0182(18) 0.0189(18) 0.0047(16) 0.0045(13) 0.0004(14)
 C17 0.0213(18) 0.0180(18) 0.0169(17) 0.0043(15) 0.0016(14) 0.0009(14)
 C18 0.0212(18) 0.0179(18) 0.0178(17) 0.0074(15) 0.0053(14) 0.0040(14)
 C19 0.0164(16) 0.0181(18) 0.0194(18) 0.0068(14) 0.0055(13) 0.0059(13)
 C20 0.0143(16) 0.0179(17) 0.0187(17) 0.0042(15) 0.0040(13) 0.0075(13)
 C21 0.0202(17) 0.0208(18) 0.0207(18) 0.0073(15) 0.0046(14) 0.0047(14)
 C22 0.0243(19) 0.0211(19) 0.0231(18) 0.0096(16) 0.0037(14) 0.0038(15)
 C23 0.0258(19) 0.031(2) 0.0199(18) 0.0101(17) 0.0022(14) 0.0080(16)
 C24 0.0189(17) 0.0228(19) 0.0181(18) 0.0012(15) -0.0024(13) 0.0027(14)
 C25 0.0148(16) 0.0199(18) 0.0203(17) 0.0053(15) 0.0046(13) 0.0067(14)
 C26 0.0153(16) 0.0176(18) 0.0209(18) 0.0023(15) 0.0024(13) 0.0020(13)
 C27 0.0158(17) 0.0175(17) 0.0264(19) 0.0074(16) 0.0075(14) 0.0059(14)
 C28 0.0231(19) 0.0194(19) 0.033(2) 0.0102(17) 0.0096(16) 0.0047(14)
 C29 0.030(2) 0.022(2) 0.041(2) 0.0172(19) 0.0147(17) 0.0062(16)
 C30 0.030(2) 0.032(2) 0.029(2) 0.0184(18) 0.0101(16) 0.0108(17)
 C31 0.0188(17) 0.023(2) 0.0242(19) 0.0095(16) 0.0054(14) 0.0043(15)
 C32 0.0160(17) 0.0187(18) 0.0220(18) 0.0074(16) 0.0068(14) 0.0067(14)
 C33 0.0142(16) 0.0192(18) 0.0166(17) 0.0036(15) 0.0052(13) 0.0005(13)
 C34 0.0201(18) 0.0216(18) 0.0224(18) 0.0040(16) 0.0054(14) 0.0000(15)
 C35 0.0200(18) 0.030(2) 0.0221(19) 0.0023(17) 0.0023(14) -0.0022(16)
 C36 0.0217(18) 0.041(2) 0.0174(18) 0.0086(18) 0.0030(14) -0.0014(16)
 C37 0.0238(19) 0.033(2) 0.0222(19) 0.0114(17) 0.0032(14) -0.0015(16)

_geom_special_details
;
 All esds (except the esd in the dihedral angle between two l.s. planes)
 are estimated using the full covariance matrix.  The cell esds are taken
 into account individually in the estimation of esds in distances, angles
 and torsion angles; correlations between esds in cell parameters are only
 used when they are defined by crystal symmetry.  An approximate (isotropic)
 treatment of cell esds is used for estimating esds involving l.s. planes.
;
loop_
  _geom_bond_atom_site_label_1
  _geom_bond_atom_site_label_2
  _geom_bond_distance
  _geom_bond_site_symmetry_2
  _geom_bond_publ_flag
 Ag1 N1 2.094(3) . ?
 Ag1 N6 2.093(3) . ?
 Ag2 N2 2.109(3) . ?
 Ag2 N3 2.107(3) . ?
 Ag3 N4 2.074(3) . ?
 Ag3 N5 2.080(3) . ?
 F1 C4 1.339(5) . ?
 F2 C4 1.355(4) . ?
 F3 C4 1.327(4) . ?
 F4 C5 1.329(4) . ?
 F5 C5 1.335(4) . ?
 F6 C5 1.339(4) . ?
 F7 C9 1.329(4) . ?
 F8 C9 1.349(4) . ?
 F9 C9 1.313(4) . ?
 F10 C10 1.338(4) . ?
 F11 C10 1.320(5) . ?
 F12 C10 1.337(4) . ?
 F13 C14 1.326(4) . ?
 F14 C14 1.341(5) . ?
 F15 C14 1.340(4) . ?
 F16 C15 1.330(4) . ?
 F17 C15 1.340(4) . ?
 F18 C15 1.336(4) . ?
 N1 N2 1.349(4) . ?
 N1 C1 1.349(4) . ?
 N2 C3 1.354(4) . ?
 N3 N4 1.360(4) . ?
 N3 C6 1.340(5) . ?
 N4 C8 1.345(5) . ?
 N5 N6 1.350(4) . ?
 N5 C11 1.356(4) . ?
 N6 C13 1.340(5) . ?
 C1 C2 1.387(5) . ?
 C1 C4 1.471(5) . ?
 C2 H2 0.9500 . ?
 C2 C3 1.373(5) . ?
 C3 C5 1.481(5) . ?
 C6 C7 1.387(5) . ?
 C6 C9 1.482(5) . ?
 C7 H7 0.9500 . ?
 C7 C8 1.380(5) . ?
 C8 C10 1.485(5) . ?
 C11 C12 1.384(5) . ?
 C11 C14 1.479(5) . ?
 C12 H12 0.9500 . ?
 C12 C13 1.382(5) . ?
 C13 C15 1.484(5) . ?
 O1 C16 1.211(5) . ?
 N7 C33 1.340(5) . ?
 N7 C37 1.330(5) . ?
 C16 C17 1.488(5) . ?
 C16 C33 1.505(5) . ?
 C17 H17 0.9500 . ?
 C17 C18 1.343(5) . ?
 C18 H18 0.9500 . ?
 C18 C19 1.461(5) . ?
 C19 C20 1.422(5) . ?
 C19 C32 1.422(5) . ?
 C20 C21 1.428(5) . ?
 C20 C25 1.434(5) . ?
 C21 H21 0.9500 . ?
 C21 C22 1.363(5) . ?
 C22 H22 0.9500 . ?
 C22 C23 1.420(5) . ?
 C23 H23 0.9500 . ?
 C23 C24 1.347(6) . ?
 C24 H24 0.9500 . ?
 C24 C25 1.429(5) . ?
 C25 C26 1.393(5) . ?
 C26 H26 0.9500 . ?
 C26 C27 1.394(5) . ?
 C27 C28 1.416(6) . ?
 C27 C32 1.436(5) . ?
 C28 H28 0.9500 . ?
 C28 C29 1.366(6) . ?
 C29 H29 0.9500 . ?
 C29 C30 1.409(6) . ?
 C30 H30 0.9500 . ?
 C30 C31 1.359(6) . ?
 C31 H31 0.9500 . ?
 C31 C32 1.433(5) . ?
 C33 C34 1.384(5) . ?
 C34 H34 0.9500 . ?
 C34 C35 1.396(5) . ?
 C35 H35 0.9500 . ?
 C35 C36 1.376(6) . ?
 C36 H36 0.9500 . ?
 C36 C37 1.388(6) . ?
 C37 H37 0.9500 . ?

loop_
  _geom_angle_atom_site_label_1
  _geom_angle_atom_site_label_2
  _geom_angle_atom_site_label_3
  _geom_angle
  _geom_angle_site_symmetry_1
  _geom_angle_site_symmetry_3
  _geom_angle_publ_flag
 N6 Ag1 N1 176.97(12) . . ?
 N3 Ag2 N2 176.59(11) . . ?
 N4 Ag3 N5 178.07(12) . . ?
 N2 N1 Ag1 120.1(2) . . ?
 C1 N1 Ag1 131.7(3) . . ?
 C1 N1 N2 107.8(3) . . ?
 N1 N2 Ag2 118.9(2) . . ?
 N1 N2 C3 107.7(3) . . ?
 C3 N2 Ag2 133.0(2) . . ?
 N4 N3 Ag2 120.3(2) . . ?
 C6 N3 Ag2 129.0(2) . . ?
 C6 N3 N4 107.8(3) . . ?
 N3 N4 Ag3 121.0(2) . . ?
 C8 N4 Ag3 132.0(2) . . ?
 C8 N4 N3 107.0(3) . . ?
 N6 N5 Ag3 118.5(2) . . ?
 N6 N5 C11 107.5(3) . . ?
 C11 N5 Ag3 133.7(3) . . ?
 N5 N6 Ag1 121.0(2) . . ?
 C13 N6 Ag1 130.3(2) . . ?
 C13 N6 N5 108.0(3) . . ?
 N1 C1 C2 110.1(3) . . ?
 N1 C1 C4 120.3(3) . . ?
 C2 C1 C4 129.5(3) . . ?
 C1 C2 H2 128.0 . . ?
 C3 C2 C1 103.9(3) . . ?
 C3 C2 H2 128.0 . . ?
 N2 C3 C2 110.4(3) . . ?
 N2 C3 C5 120.6(3) . . ?
 C2 C3 C5 129.0(3) . . ?
 F1 C4 F2 105.4(3) . . ?
 F1 C4 C1 112.9(3) . . ?
 F2 C4 C1 112.4(3) . . ?
 F3 C4 F1 106.7(3) . . ?
 F3 C4 F2 106.7(3) . . ?
 F3 C4 C1 112.3(3) . . ?
 F4 C5 F5 106.5(3) . . ?
 F4 C5 F6 107.0(3) . . ?
 F4 C5 C3 111.6(3) . . ?
 F5 C5 F6 104.8(3) . . ?
 F5 C5 C3 113.2(3) . . ?
 F6 C5 C3 113.2(3) . . ?
 N3 C6 C7 111.0(3) . . ?
 N3 C6 C9 119.5(3) . . ?
 C7 C6 C9 129.5(3) . . ?
 C6 C7 H7 128.6 . . ?
 C8 C7 C6 102.8(3) . . ?
 C8 C7 H7 128.6 . . ?
 N4 C8 C7 111.4(3) . . ?
 N4 C8 C10 118.9(3) . . ?
 C7 C8 C10 129.6(3) . . ?
 F7 C9 F8 105.7(3) . . ?
 F7 C9 C6 112.5(3) . . ?
 F8 C9 C6 111.4(3) . . ?
 F9 C9 F7 107.4(3) . . ?
 F9 C9 F8 106.7(3) . . ?
 F9 C9 C6 112.6(3) . . ?
 F10 C10 C8 113.1(3) . . ?
 F11 C10 F10 107.5(3) . . ?
 F11 C10 F12 106.9(3) . . ?
 F11 C10 C8 112.1(3) . . ?
 F12 C10 F10 104.3(3) . . ?
 F12 C10 C8 112.4(3) . . ?
 N5 C11 C12 110.3(3) . . ?
 N5 C11 C14 120.4(3) . . ?
 C12 C11 C14 129.3(3) . . ?
 C11 C12 H12 128.3 . . ?
 C13 C12 C11 103.4(3) . . ?
 C13 C12 H12 128.3 . . ?
 N6 C13 C12 110.9(3) . . ?
 N6 C13 C15 120.0(3) . . ?
 C12 C13 C15 129.1(3) . . ?
 F13 C14 F14 107.3(3) . . ?
 F13 C14 F15 107.1(3) . . ?
 F13 C14 C11 111.2(3) . . ?
 F14 C14 C11 112.5(3) . . ?
 F15 C14 F14 105.7(3) . . ?
 F15 C14 C11 112.6(3) . . ?
 F16 C15 F17 107.0(3) . . ?
 F16 C15 F18 107.0(3) . . ?
 F16 C15 C13 111.4(3) . . ?
 F17 C15 C13 113.2(3) . . ?
 F18 C15 F17 105.6(3) . . ?
 F18 C15 C13 112.1(3) . . ?
 C37 N7 C33 117.0(3) . . ?
 O1 C16 C17 122.6(3) . . ?
 O1 C16 C33 120.3(3) . . ?
 C17 C16 C33 117.0(3) . . ?
 C16 C17 H17 121.1 . . ?
 C18 C17 C16 117.8(4) . . ?
 C18 C17 H17 121.1 . . ?
 C17 C18 H18 113.9 . . ?
 C17 C18 C19 132.1(4) . . ?
 C19 C18 H18 113.9 . . ?
 C20 C19 C18 116.1(3) . . ?
 C20 C19 C32 119.5(4) . . ?
 C32 C19 C18 124.3(3) . . ?
 C19 C20 C21 123.0(3) . . ?
 C19 C20 C25 120.1(4) . . ?
 C21 C20 C25 116.9(3) . . ?
 C20 C21 H21 119.1 . . ?
 C22 C21 C20 121.9(3) . . ?
 C22 C21 H21 119.1 . . ?
 C21 C22 H22 119.7 . . ?
 C21 C22 C23 120.5(4) . . ?
 C23 C22 H22 119.7 . . ?
 C22 C23 H23 120.1 . . ?
 C24 C23 C22 119.9(4) . . ?
 C24 C23 H23 120.1 . . ?
 C23 C24 H24 119.3 . . ?
 C23 C24 C25 121.4(3) . . ?
 C25 C24 H24 119.3 . . ?
 C24 C25 C20 119.5(4) . . ?
 C26 C25 C20 118.9(4) . . ?
 C26 C25 C24 121.6(3) . . ?
 C25 C26 H26 118.8 . . ?
 C25 C26 C27 122.5(3) . . ?
 C27 C26 H26 118.8 . . ?
 C26 C27 C28 120.6(3) . . ?
 C26 C27 C32 119.2(4) . . ?
 C28 C27 C32 120.2(4) . . ?
 C27 C28 H28 119.4 . . ?
 C29 C28 C27 121.3(4) . . ?
 C29 C28 H28 119.4 . . ?
 C28 C29 H29 120.5 . . ?
 C28 C29 C30 118.9(4) . . ?
 C30 C29 H29 120.5 . . ?
 C29 C30 H30 119.1 . . ?
 C31 C30 C29 121.8(4) . . ?
 C31 C30 H30 119.1 . . ?
 C30 C31 H31 119.3 . . ?
 C30 C31 C32 121.5(4) . . ?
 C32 C31 H31 119.3 . . ?
 C19 C32 C27 119.8(3) . . ?
 C19 C32 C31 123.9(3) . . ?
 C31 C32 C27 116.3(4) . . ?
 N7 C33 C16 116.7(3) . . ?
 N7 C33 C34 123.8(3) . . ?
 C34 C33 C16 119.5(4) . . ?
 C33 C34 H34 120.9 . . ?
 C33 C34 C35 118.2(4) . . ?
 C35 C34 H34 120.9 . . ?
 C34 C35 H35 120.7 . . ?
 C36 C35 C34 118.5(4) . . ?
 C36 C35 H35 120.7 . . ?
 C35 C36 H36 120.5 . . ?
 C35 C36 C37 118.9(4) . . ?
 C37 C36 H36 120.5 . . ?
 N7 C37 C36 123.5(4) . . ?
 N7 C37 H37 118.2 . . ?
 C36 C37 H37 118.2 . . ?

loop_
  _geom_torsion_atom_site_label_1
  _geom_torsion_atom_site_label_2
  _geom_torsion_atom_site_label_3
  _geom_torsion_atom_site_label_4
  _geom_torsion
  _geom_torsion_site_symmetry_1
  _geom_torsion_site_symmetry_2
  _geom_torsion_site_symmetry_3
  _geom_torsion_site_symmetry_4
  _geom_torsion_publ_flag
 Ag1 N1 N2 Ag2 -12.7(3) . . . . ?
 Ag1 N1 N2 C3 174.2(2) . . . . ?
 Ag1 N1 C1 C2 -173.5(2) . . . . ?
 Ag1 N1 C1 C4 9.2(5) . . . . ?
 Ag1 N6 C13 C12 170.2(2) . . . . ?
 Ag1 N6 C13 C15 -11.3(5) . . . . ?
 Ag2 N2 C3 C2 -171.4(2) . . . . ?
 Ag2 N2 C3 C5 10.3(5) . . . . ?
 Ag2 N3 N4 Ag3 -16.4(3) . . . . ?
 Ag2 N3 N4 C8 162.1(2) . . . . ?
 Ag2 N3 C6 C7 -159.9(2) . . . . ?
 Ag2 N3 C6 C9 21.2(5) . . . . ?
 Ag3 N4 C8 C7 178.2(2) . . . . ?
 Ag3 N4 C8 C10 -0.7(5) . . . . ?
 Ag3 N5 N6 Ag1 14.1(3) . . . . ?
 Ag3 N5 N6 C13 -174.8(2) . . . . ?
 Ag3 N5 C11 C12 173.5(2) . . . . ?
 Ag3 N5 C11 C14 -7.9(5) . . . . ?
 N1 N2 C3 C2 0.3(4) . . . . ?
 N1 N2 C3 C5 -178.0(3) . . . . ?
 N1 C1 C2 C3 0.3(4) . . . . ?
 N1 C1 C4 F1 71.0(4) . . . . ?
 N1 C1 C4 F2 -48.1(5) . . . . ?
 N1 C1 C4 F3 -168.4(3) . . . . ?
 N2 N1 C1 C2 -0.1(4) . . . . ?
 N2 N1 C1 C4 -177.4(3) . . . . ?
 N2 C3 C5 F4 -152.9(3) . . . . ?
 N2 C3 C5 F5 87.0(4) . . . . ?
 N2 C3 C5 F6 -32.1(5) . . . . ?
 N3 N4 C8 C7 0.0(4) . . . . ?
 N3 N4 C8 C10 -178.8(3) . . . . ?
 N3 C6 C7 C8 -0.3(4) . . . . ?
 N3 C6 C9 F7 63.7(4) . . . . ?
 N3 C6 C9 F8 -54.8(4) . . . . ?
 N3 C6 C9 F9 -174.7(3) . . . . ?
 N4 N3 C6 C7 0.3(4) . . . . ?
 N4 N3 C6 C9 -178.6(3) . . . . ?
 N4 C8 C10 F10 -59.5(4) . . . . ?
 N4 C8 C10 F11 178.8(3) . . . . ?
 N4 C8 C10 F12 58.3(4) . . . . ?
 N5 N6 C13 C12 0.2(4) . . . . ?
 N5 N6 C13 C15 178.7(3) . . . . ?
 N5 C11 C12 C13 0.2(4) . . . . ?
 N5 C11 C14 F13 162.8(3) . . . . ?
 N5 C11 C14 F14 42.3(5) . . . . ?
 N5 C11 C14 F15 -76.9(4) . . . . ?
 N6 N5 C11 C12 -0.1(4) . . . . ?
 N6 N5 C11 C14 178.5(3) . . . . ?
 N6 C13 C15 F16 -173.6(3) . . . . ?
 N6 C13 C15 F17 65.8(4) . . . . ?
 N6 C13 C15 F18 -53.7(4) . . . . ?
 C1 N1 N2 Ag2 173.0(2) . . . . ?
 C1 N1 N2 C3 -0.1(4) . . . . ?
 C1 C2 C3 N2 -0.4(4) . . . . ?
 C1 C2 C3 C5 177.7(3) . . . . ?
 C2 C1 C4 F1 -105.7(4) . . . . ?
 C2 C1 C4 F2 135.2(4) . . . . ?
 C2 C1 C4 F3 14.9(5) . . . . ?
 C2 C3 C5 F4 29.2(5) . . . . ?
 C2 C3 C5 F5 -90.9(4) . . . . ?
 C2 C3 C5 F6 150.0(4) . . . . ?
 C4 C1 C2 C3 177.3(4) . . . . ?
 C6 N3 N4 Ag3 -178.6(2) . . . . ?
 C6 N3 N4 C8 -0.2(4) . . . . ?
 C6 C7 C8 N4 0.2(4) . . . . ?
 C6 C7 C8 C10 178.8(3) . . . . ?
 C7 C6 C9 F7 -114.8(4) . . . . ?
 C7 C6 C9 F8 126.6(4) . . . . ?
 C7 C6 C9 F9 6.7(6) . . . . ?
 C7 C8 C10 F10 121.9(4) . . . . ?
 C7 C8 C10 F11 0.2(5) . . . . ?
 C7 C8 C10 F12 -120.3(4) . . . . ?
 C9 C6 C7 C8 178.4(3) . . . . ?
 C11 N5 N6 Ag1 -171.2(2) . . . . ?
 C11 N5 N6 C13 0.0(3) . . . . ?
 C11 C12 C13 N6 -0.3(4) . . . . ?
 C11 C12 C13 C15 -178.6(3) . . . . ?
 C12 C11 C14 F13 -18.9(5) . . . . ?
 C12 C11 C14 F14 -139.3(4) . . . . ?
 C12 C11 C14 F15 101.4(4) . . . . ?
 C12 C13 C15 F16 4.6(5) . . . . ?
 C12 C13 C15 F17 -116.1(4) . . . . ?
 C12 C13 C15 F18 124.5(4) . . . . ?
 C14 C11 C12 C13 -178.2(3) . . . . ?
 O1 C16 C17 C18 -18.3(6) . . . . ?
 O1 C16 C33 N7 178.3(3) . . . . ?
 O1 C16 C33 C34 -0.9(5) . . . . ?
 N7 C33 C34 C35 -1.7(5) . . . . ?
 C16 C17 C18 C19 -179.7(4) . . . . ?
 C16 C33 C34 C35 177.4(3) . . . . ?
 C17 C16 C33 N7 0.3(5) . . . . ?
 C17 C16 C33 C34 -178.9(3) . . . . ?
 C17 C18 C19 C20 -149.9(4) . . . . ?
 C17 C18 C19 C32 32.4(6) . . . . ?
 C18 C19 C20 C21 4.5(5) . . . . ?
 C18 C19 C20 C25 -177.0(3) . . . . ?
 C18 C19 C32 C27 177.0(3) . . . . ?
 C18 C19 C32 C31 -1.8(6) . . . . ?
 C19 C20 C21 C22 179.5(4) . . . . ?
 C19 C20 C25 C24 -178.9(3) . . . . ?
 C19 C20 C25 C26 -0.1(5) . . . . ?
 C20 C19 C32 C27 -0.7(5) . . . . ?
 C20 C19 C32 C31 -179.4(3) . . . . ?
 C20 C21 C22 C23 -0.8(5) . . . . ?
 C20 C25 C26 C27 -0.9(5) . . . . ?
 C21 C20 C25 C24 -0.4(5) . . . . ?
 C21 C20 C25 C26 178.4(3) . . . . ?
 C21 C22 C23 C24 0.0(6) . . . . ?
 C22 C23 C24 C25 0.6(6) . . . . ?
 C23 C24 C25 C20 -0.4(5) . . . . ?
 C23 C24 C25 C26 -179.2(3) . . . . ?
 C24 C25 C26 C27 177.9(3) . . . . ?
 C25 C20 C21 C22 0.9(5) . . . . ?
 C25 C26 C27 C28 -178.4(3) . . . . ?
 C25 C26 C27 C32 1.1(5) . . . . ?
 C26 C27 C28 C29 179.8(3) . . . . ?
 C26 C27 C32 C19 -0.3(5) . . . . ?
 C26 C27 C32 C31 178.6(3) . . . . ?
 C27 C28 C29 C30 1.5(6) . . . . ?
 C28 C27 C32 C19 179.2(3) . . . . ?
 C28 C27 C32 C31 -1.9(5) . . . . ?
 C28 C29 C30 C31 -1.6(6) . . . . ?
 C29 C30 C31 C32 -0.2(6) . . . . ?
 C30 C31 C32 C19 -179.3(3) . . . . ?
 C30 C31 C32 C27 1.9(5) . . . . ?
 C32 C19 C20 C21 -177.6(3) . . . . ?
 C32 C19 C20 C25 0.9(5) . . . . ?
 C32 C27 C28 C29 0.2(5) . . . . ?
 C33 N7 C37 C36 -1.2(6) . . . . ?
 C33 C16 C17 C18 159.7(3) . . . . ?
 C33 C34 C35 C36 0.0(5) . . . . ?
 C34 C35 C36 C37 0.9(6) . . . . ?
 C35 C36 C37 N7 -0.3(6) . . . . ?
 C37 N7 C33 C16 -176.9(3) . . . . ?
 C37 N7 C33 C34 2.3(5) . . . . ?

_shelx_res_file
;
TITL a_a.res in P1
    a.res
    created by SHELXL-2018/3 at 14:08:24 on 30-Mar-2023
REM Old TITL a in P1
REM SHELXT solution in P1
REM R1 0.059, Rweak 0.045, Alpha 0.000, Orientation as input
REM Flack x = 0.031 ( 0.009 ) from Parsons' quotients
REM Formula found by SHELXT: C35 N5 O8 F15 Ag3
CELL 0.71073 7.8326 11.0556 12.8446 114.754 102.718 94.914
ZERR 1 0.0002 0.0002 0.0003 0.001 0.001 0.001
LATT -1
SFAC C H Ag F N O
UNIT 37 18 3 18 7 1

L.S. 24
PLAN  5
SIZE 0.24 0.17 0.08
TEMP -173.15
CONF
BOND $H
list 4
MORE -1
fmap 2
acta
OMIT -2 52
OMIT 0 -6 5
OMIT 2 -3 5
OMIT 2 -2 5
OMIT -7 -1 9
OMIT -2 -5 3
OMIT 3 3 -6
OMIT -4 -1 -1
OMIT -4 5 -9
OMIT -2 -10 -2
OMIT -1 -5 5
OMIT 4 -4 0
OMIT -1 -9 2
OMIT -5 9 -3
OMIT 4 1 1
REM <olex2.extras>
REM <HklSrc "%.\\a.hkl">
REM </olex2.extras>

WGHT    0.015000
FVAR       0.42243
AG1   3    0.706878    0.680557    0.493293    11.00000    0.01853    0.01794 =
         0.01357    0.00636   -0.00053    0.00054
AG2   3    0.713779    0.502895    0.658968    11.00000    0.01651    0.01484 =
         0.01711    0.00701   -0.00104   -0.00258
AG3   3    0.426293    0.366558    0.365920    11.00000    0.02091    0.01664 =
         0.01596    0.00718    0.00103    0.00109
F1    4    0.893165    1.044595    0.698940    11.00000    0.04953    0.04061 =
         0.06636    0.03900    0.03086    0.02415
F2    4    1.019237    0.926868    0.568580    11.00000    0.04704    0.02563 =
         0.01865    0.01206    0.00558   -0.00270
F3    4    1.177845    1.070436    0.745650    11.00000    0.04689    0.02521 =
         0.03255    0.01290    0.00197   -0.01495
F4    4    1.181028    0.782602    1.014786    11.00000    0.07008    0.03355 =
         0.01573    0.00776   -0.01357   -0.00473
F5    4    1.221226    0.607756    0.873195    11.00000    0.03489    0.05540 =
         0.03665    0.03205    0.01347    0.02349
F6    4    0.968513    0.608360    0.907261    11.00000    0.02571    0.04972 =
         0.03865    0.03304    0.00366   -0.00080
F7    4    0.502063    0.383876    0.832373    11.00000    0.07681    0.05263 =
         0.01966    0.00970    0.01196    0.03547
F8    4    0.743906    0.328297    0.794499    11.00000    0.02967    0.06302 =
         0.02586    0.01975   -0.00502   -0.01500
F9    4    0.541659    0.182406    0.790284    11.00000    0.05593    0.03903 =
         0.03401    0.02619   -0.00746   -0.01198
F10   4    0.095867    0.098688    0.281329    11.00000    0.02557    0.04730 =
         0.03202   -0.00183   -0.00664    0.01742
F11   4    0.164847   -0.071247    0.309046    11.00000    0.06884    0.02516 =
         0.03603    0.00884   -0.01003   -0.02513
F12   4    0.327484    0.027899    0.242980    11.00000    0.02515    0.04227 =
         0.01971   -0.00211    0.00179    0.00255
F13   4    0.149371    0.306989   -0.031302    11.00000    0.04220    0.04336 =
         0.02242    0.00717   -0.01323   -0.00026
F14   4    0.147519    0.256283    0.112708    11.00000    0.02960    0.03614 =
         0.03215    0.00659    0.00667   -0.01127
F15   4    0.354104    0.213015    0.026096    11.00000    0.02827    0.02336 =
         0.03968   -0.00254    0.00675    0.00051
F16   4    0.544663    0.828150    0.190311    11.00000    0.05516    0.03220 =
         0.03068    0.02113    0.01117    0.00549
F17   4    0.774587    0.815187    0.308976    11.00000    0.02034    0.02895 =
         0.07959    0.02312    0.00597    0.00069
F18   4    0.552911    0.880952    0.372269    11.00000    0.05672    0.02044 =
         0.02967    0.00923    0.02012    0.00753
N1    5    0.891225    0.756767    0.662248    11.00000    0.01682    0.01590 =
         0.01634    0.00634    0.00230   -0.00004
N2    5    0.908635    0.680223    0.721236    11.00000    0.01487    0.01928 =
         0.01170    0.00607    0.00066    0.00030
N3    5    0.510299    0.329192    0.589424    11.00000    0.01883    0.01523 =
         0.01560    0.00688    0.00180    0.00059
N4    5    0.419016    0.267542    0.471364    11.00000    0.01604    0.01516 =
         0.01489    0.00372    0.00086    0.00011
N5    5    0.440676    0.470831    0.264794    11.00000    0.01617    0.01762 =
         0.01600    0.00697    0.00021    0.00271
N6    5    0.533267    0.600251    0.320409    11.00000    0.01860    0.01677 =
         0.01535    0.00662    0.00361    0.00388
C1    1    1.018372    0.871176    0.726067    11.00000    0.01692    0.01744 =
         0.01640    0.00621    0.00525    0.00041
C2    1    1.120268    0.869694    0.828423    11.00000    0.01698    0.02068 =
         0.01598    0.00462    0.00330   -0.00243
AFIX  43
H2    2    1.217875    0.937137    0.889269    11.00000   -1.20000
AFIX   0
C3    1    1.047320    0.748140    0.821385    11.00000    0.01584    0.02004 =
         0.01167    0.00448    0.00164    0.00051
C4    1    1.027736    0.977674    0.686075    11.00000    0.02773    0.02222 =
         0.01899    0.00761    0.00582   -0.00022
C5    1    1.103941    0.687603    0.903501    11.00000    0.02038    0.02777 =
         0.01626    0.00928    0.00069   -0.00193
C6    1    0.484487    0.240835    0.633479    11.00000    0.01714    0.01655 =
         0.01901    0.00762    0.00269    0.00159
C7    1    0.376281    0.118774    0.545277    11.00000    0.02063    0.01512 =
         0.02222    0.00767    0.00633   -0.00269
AFIX  43
H7    2    0.337314    0.039112    0.551776    11.00000   -1.20000
AFIX   0
C8    1    0.339258    0.141745    0.445731    11.00000    0.01575    0.01402 =
         0.01743    0.00226    0.00202    0.00055
C9    1    0.565888    0.282634    0.762132    11.00000    0.02453    0.02030 =
         0.02068    0.01061    0.00336   -0.00205
C10   1    0.231844    0.049198    0.321148    11.00000    0.01775    0.01954 =
         0.02190    0.00474   -0.00102    0.00002
C11   1    0.361719    0.442092    0.149728    11.00000    0.01609    0.02429 =
         0.01532    0.00574    0.00170    0.00270
C12   1    0.402963    0.553860    0.130409    11.00000    0.01860    0.02729 =
         0.01640    0.01172    0.00277    0.00536
AFIX  43
H12   2    0.365677    0.562401    0.058665    11.00000   -1.20000
AFIX   0
C13   1    0.511422    0.650046    0.240575    11.00000    0.01840    0.01941 =
         0.01746    0.00920    0.00713    0.00507
C14   1    0.253444    0.305406    0.064515    11.00000    0.01855    0.02513 =
         0.01841    0.00313   -0.00006   -0.00124
C15   1    0.595614    0.792672    0.277577    11.00000    0.02023    0.02430 =
         0.02256    0.01221    0.00687    0.00725

O1    6    0.459712    0.872375    0.651064    11.00000    0.03679    0.02665 =
         0.03038    0.01540   -0.00496   -0.00620
N7    5    0.566122    0.720870    0.843590    11.00000    0.01910    0.02761 =
         0.01922    0.00839    0.00347   -0.00130
C16   1    0.460671    0.786958    0.686823    11.00000    0.01899    0.01823 =
         0.01889    0.00468    0.00449    0.00039
C17   1    0.346201    0.648492    0.615575    11.00000    0.02134    0.01802 =
         0.01691    0.00432    0.00164    0.00094
AFIX  43
H17   2    0.372033    0.575676    0.633342    11.00000   -1.20000
AFIX   0
C18   1    0.205212    0.629903    0.525354    11.00000    0.02116    0.01792 =
         0.01784    0.00742    0.00526    0.00403
AFIX  43
H18   2    0.192549    0.709419    0.515398    11.00000   -1.20000
AFIX   0
C19   1    0.067621    0.510436    0.439621    11.00000    0.01645    0.01812 =
         0.01941    0.00680    0.00547    0.00587
C20   1   -0.004928    0.504639    0.325569    11.00000    0.01432    0.01791 =
         0.01874    0.00417    0.00400    0.00746
C21   1    0.059758    0.603221    0.291510    11.00000    0.02018    0.02077 =
         0.02069    0.00727    0.00462    0.00465
AFIX  43
H21   2    0.154869    0.676737    0.347295    11.00000   -1.20000
AFIX   0
C22   1   -0.011027    0.594890    0.181258    11.00000    0.02429    0.02113 =
         0.02314    0.00965    0.00368    0.00377
AFIX  43
H22   2    0.034197    0.662820    0.161802    11.00000   -1.20000
AFIX   0
C23   1   -0.151840    0.485464    0.095254    11.00000    0.02579    0.03054 =
         0.01986    0.01008    0.00216    0.00801
AFIX  43
H23   2   -0.200616    0.480314    0.018592    11.00000   -1.20000
AFIX   0
C24   1   -0.216135    0.388943    0.122605    11.00000    0.01893    0.02278 =
         0.01812    0.00117   -0.00237    0.00273
AFIX  43
H24   2   -0.309569    0.315614    0.064262    11.00000   -1.20000
AFIX   0
C25   1   -0.146772    0.394538    0.237499    11.00000    0.01485    0.01988 =
         0.02026    0.00525    0.00457    0.00670
C26   1   -0.211218    0.294101    0.265660    11.00000    0.01526    0.01764 =
         0.02090    0.00233    0.00241    0.00203
AFIX  43
H26   2   -0.306312    0.221973    0.207595    11.00000   -1.20000
AFIX   0
C27   1   -0.141406    0.295446    0.375867    11.00000    0.01580    0.01753 =
         0.02639    0.00738    0.00751    0.00595
C28   1   -0.208076    0.189423    0.399663    11.00000    0.02314    0.01943 =
         0.03259    0.01018    0.00960    0.00471
AFIX  43
H28   2   -0.301501    0.117174    0.339800    11.00000   -1.20000
AFIX   0
C29   1   -0.140628    0.189058    0.507023    11.00000    0.03001    0.02202 =
         0.04063    0.01721    0.01466    0.00622
AFIX  43
H29   2   -0.184349    0.116281    0.521314    11.00000   -1.20000
AFIX   0
C30   1   -0.005160    0.298364    0.596233    11.00000    0.02950    0.03193 =
         0.02909    0.01842    0.01007    0.01078
AFIX  43
H30   2    0.039874    0.299564    0.671717    11.00000   -1.20000
AFIX   0
C31   1    0.062814    0.402107    0.577223    11.00000    0.01880    0.02318 =
         0.02415    0.00955    0.00540    0.00429
AFIX  43
H31   2    0.153895    0.474126    0.639711    11.00000   -1.20000
AFIX   0
C32   1    0.000184    0.405332    0.464994    11.00000    0.01599    0.01865 =
         0.02201    0.00738    0.00683    0.00671
C33   1    0.575969    0.819712    0.809346    11.00000    0.01422    0.01923 =
         0.01664    0.00357    0.00523    0.00053
C34   1    0.682823    0.947672    0.880357    11.00000    0.02013    0.02164 =
         0.02237    0.00405    0.00542    0.00002
AFIX  43
H34   2    0.688115    1.013931    0.851621    11.00000   -1.20000
AFIX   0
C35   1    0.782655    0.976732    0.995408    11.00000    0.01998    0.03044 =
         0.02209    0.00225    0.00228   -0.00219
AFIX  43
H35   2    0.857586    1.063424    1.046947    11.00000   -1.20000
AFIX   0
C36   1    0.770129    0.877056    1.032498    11.00000    0.02170    0.04096 =
         0.01737    0.00861    0.00298   -0.00142
AFIX  43
H36   2    0.835069    0.894141    1.110674    11.00000   -1.20000
AFIX   0
C37   1    0.661106    0.751144    0.953886    11.00000    0.02381    0.03330 =
         0.02222    0.01141    0.00321   -0.00152
AFIX  43
H37   2    0.653941    0.682909    0.980281    11.00000   -1.20000
AFIX   0
HKLF 4


REM  a_a.res in P1
REM wR2 = 0.036805, GooF = S = 1.03742, Restrained GooF = 1.03710 for all data
REM R1 = 0.015331 for 5326 Fo > 4sig(Fo) and 0.015508 for all 5359 data
REM 595 parameters refined using 3 restraints

END

WGHT      0.0150      0.0000

REM Highest difference peak  0.441,  deepest hole -0.345,  1-sigma level  0.054
Q1    1   0.4550  0.2782  0.3193  11.00000  0.05    0.44
Q2    1   0.6777  0.5847  0.7164  11.00000  0.05    0.43
Q3    1   0.7383  0.6014  0.4395  11.00000  0.05    0.34
Q4    1   0.4390  0.4368  0.3161  11.00000  0.05    0.34
Q5    1   0.7670  0.4354  0.6057  11.00000  0.05    0.33
;
_shelx_res_checksum                5898
_shelx_hkl_file
;
  -1   0   0  820.72   23.50
  -1   0   0  805.32   23.70
  -1   0   0  809.02   23.50
   1   0   0  815.92   23.50
  -2   0   0   60.29    2.40
  -2   0   0   63.49    2.10
  -2   0   0   58.39    2.30
  -2   0   0   60.99    2.10
   2   0   0   49.20    2.20
   2   0   0   47.30    2.00
   2   0   0   48.90    2.00
  -3   0   0 1886.81   55.09
  -3   0   0 1869.11   55.19
  -3   0   0 1787.12   55.59
  -3   0   0 1860.31   55.69
   3   0   0 1948.71   55.09
   3   0   0 1940.81   55.69
   3   0   0 2017.70   55.19
  -4   0   0  842.72   24.90
  -4   0   0  805.12   25.10
   4   0   0  836.32   24.90
   4   0   0  849.72   25.80
   4   0   0  869.31   25.10
  -5   0   0  129.39    4.70
   5   0   0  140.09    5.10
   5   0   0  133.49    5.70
   5   0   0  128.99    4.70
  -6   0   0  521.35   14.90
   6   0   0  488.05   16.40
   6   0   0  489.75   15.40
   6   0   0  420.36   15.90
  -7   0   0  458.85   13.80
   7   0   0  424.36   13.80
   7   0   0  450.15   14.60
  -8   0   0  125.79    4.60
   8   0   0  126.59    6.50
   8   0   0  126.79    5.50
   9   0   0    6.70    1.70
   9   0   0    7.90    1.80
  10   0   0   80.69    5.90
  10  -1   0    7.30    1.50
  10  -1   0   11.30    3.30
   9  -1   0    0.50    0.80
   9  -1   0    2.30    1.30
   8  -1   0  167.08    6.80
   8  -1   0  161.98    7.70
   7  -1   0  273.27   11.20
   7  -1   0  284.77   10.00
   6  -1   0  115.79    5.50
   6  -1   0  113.19    4.80
   6  -1   0  108.39    3.90
  -6   1   0  115.09    3.80
   5  -1   0  451.85   14.30
   5  -1   0  440.66   14.90
   5  -1   0  429.46   13.50
  -5   1   0  465.25   13.40
   4  -1   0 1690.13   48.70
   4  -1   0 1625.84   49.30
   4  -1   0 1657.63   48.00
  -4   1   0 1663.33   47.90
   3  -1   0  128.39    4.30
   3  -1   0  120.79    4.60
   3  -1   0  126.49    3.80
  -3   1   0  118.99    3.70
  -3   1   0  108.09    4.30
  -3   1   0  104.29    4.40
  -3   1   0  109.99    4.20
   2  -1   0  973.00   29.50
   2  -1   0 1014.20   29.00
   2  -1   0  977.50   29.60
   2  -1   0  987.90   29.70
  -2   1   0 1032.20   29.50
  -2   1   0 1057.69   29.60
   1  -1   0 2465.25  101.79
  -1   1   0 2493.65  102.79
   0   1   0 1473.95   61.19
  -1  -1   0  229.68    7.30
  -1  -1   0  233.98    7.40
   1   1   0  247.98    7.40
   1   1   0  242.68    7.30
  -2  -1   0 1467.55   43.60
  -2  -1   0 1489.25   43.10
  -2  -1   0 1553.14   43.60
   2   1   0 1516.05   43.10
   2   1   0 1505.15   43.60
   2   1   0 1424.16   43.40
  -3  -1   0 2366.96   67.19
  -3  -1   0 2336.57   67.59
  -3  -1   0 2347.07   68.29
   3   1   0 2247.98   67.49
   3   1   0 2337.47   67.19
  -4  -1   0  437.86   14.00
   4   1   0  445.36   14.50
   4   1   0  461.55   13.70
  -5  -1   0   87.09    3.70
  -5  -1   0   96.49    3.90
   5   1   0   86.69    3.80
   5   1   0   95.89    4.40
  -6  -1   0  549.54   17.10
   6   1   0  543.75   18.20
   6   1   0  543.85   17.00
  -7  -1   0  274.77    9.00
   7   1   0  250.77   10.20
   7   1   0  244.28    8.90
  -8  -1   0  112.99    4.50
   8   1   0  105.09    5.80
   8   1   0  107.39    4.80
  -9  -1   0  214.18    7.40
   9   1   0  214.18    9.70
  10   1   0  141.39    7.70
  10  -2   0    2.80    1.20
  10  -2   0    3.70    1.70
   9  -2   0   19.10    2.90
   9  -2   0   18.50    2.10
   8  -2   0  149.69    7.30
   8  -2   0  139.59    8.30
   7  -2   0   66.49    4.20
   7  -2   0   68.59    3.70
   6  -2   0  248.88    9.50
   6  -2   0  237.48    8.70
   5  -2   0  631.44   20.40
   5  -2   0  633.44   19.80
   4  -2   0   36.30    2.10
   4  -2   0   40.00    2.40
   3  -2   0  174.38    5.90
   3  -2   0  175.98    5.90
   3  -2   0  178.28    5.20
   3  -2   0  173.28    6.20
  -3   2   0  161.48    5.90
  -3   2   0  159.18    5.80
  -3   2   0  160.38    6.00
   2  -2   0  446.76   13.10
   2  -2   0  448.66   13.40
   2  -2   0  454.25   13.30
  -2   2   0  422.16   13.20
  -2   2   0  419.96   13.20
  -2   2   0  408.06   13.10
   1  -2   0  467.35   13.50
   1  -2   0  487.45   13.50
   1  -2   0  491.35   13.60
  -1   2   0  405.86   13.50
  -1   2   0  417.96   13.40
   0  -2   0  378.46   11.30
   0  -2   0  368.86   10.80
   0  -2   0  365.06   10.90
   0   2   0  360.26   11.20
   0   2   0  365.66   10.90
  -1  -2   0  659.53   20.10
  -1  -2   0  661.93   20.40
   1   2   0  693.63   20.40
   1   2   0  701.93   20.10
  -2  -2   0 1025.60   30.90
  -2  -2   0 1002.90   30.70
   2   2   0 1079.99   30.80
   2   2   0 1043.60   30.80
  -3  -2   0 1588.24   46.10
  -3  -2   0 1582.44   45.10
   3   2   0 1586.64   46.10
   3   2   0 1491.15   45.90
   3   2   0 1547.25   45.00
  -4  -2   0   63.99    2.40
   4   2   0   57.19    3.00
   4   2   0   57.09    2.30
   4   2   0   56.79    2.90
  -5  -2   0  292.97    9.50
  -5  -2   0  305.27   10.40
   5   2   0  297.37    9.50
   5   2   0  301.17   10.70
  -6  -2   0  321.57   11.10
   6   2   0  314.77   11.60
  -7  -2   0   84.09    4.10
   7   2   0   74.09    4.50
  -8  -2   0  122.49    5.30
   8   2   0  109.69    6.10
  -9  -2   0  115.99    5.10
   9   2   0  122.89    6.70
  10   2   0   59.29    4.60
  10  -3   0   16.90    2.40
  10  -3   0   11.50    2.50
   9  -3   0   14.30    2.60
   9  -3   0   14.40    2.20
   8  -3   0  111.09    5.40
   8  -3   0  104.49    5.90
   7  -3   0   56.79    3.40
   7  -3   0   64.89    4.50
   6  -3   0   46.70    2.80
   6  -3   0   47.10    3.20
   5  -3   0  218.38    8.30
   5  -3   0  238.98    8.30
   5  -3   0  233.68    8.80
   4  -3   0   75.49    3.40
   4  -3   0   78.69    3.50
   4  -3   0   77.19    2.60
   4  -3   0   74.29    3.70
   3  -3   0   64.19    3.00
   3  -3   0   56.29    2.20
   3  -3   0   61.19    2.80
   3  -3   0   59.69    2.60
  -3   3   0   62.59    2.90
   2  -3   0   68.99    3.00
   2  -3   0   73.89    3.10
   2  -3   0   75.69    2.90
   2  -3   0   74.59    2.80
  -2   3   0   80.19    3.10
  -2   3   0   85.39    3.00
   1  -3   0  366.56   11.10
   1  -3   0  361.56   11.20
   1  -3   0  361.56   11.40
  -1   3   0  366.36   11.30
  -1   3   0  376.96   11.00
   0  -3   0  356.26   10.70
   0  -3   0  337.47   10.00
   0  -3   0  333.37   10.20
   0   3   0  322.57   10.00
   0   3   0  321.67   10.50
  -1  -3   0   19.90    1.20
  -1  -3   0   18.90    1.40
   1   3   0   20.70    1.40
   1   3   0   21.40    1.20
  -2  -3   0  187.38    6.80
  -2  -3   0  200.58    6.90
   2   3   0  180.18    6.70
   2   3   0  180.38    6.40
  -3  -3   0   63.29    3.30
   3   3   0   63.09    3.00
  -4  -3   0  507.15   16.30
  -4  -3   0  487.05   14.80
   4   3   0  505.25   16.20
  -5  -3   0   54.19    3.20
  -5  -3   0   49.80    2.20
   5   3   0   59.19    3.30
  -6  -3   0   86.69    4.50
  -6  -3   0   83.69    3.40
   6   3   0   92.99    4.70
  -7  -3   0    0.40    1.00
   7   3   0    1.10    0.70
  -8  -3   0   12.70    1.90
   8   3   0    8.50    1.90
  -9  -3   0   25.40    2.50
   9   3   0   18.70    3.00
  10  -4   0    1.40    1.60
  10  -4   0    0.70    0.90
   9  -4   0  179.48    8.60
   9  -4   0  176.98    7.90
   8  -4   0  126.89    6.10
   8  -4   0  135.89    6.90
   7  -4   0   72.79    5.20
   6  -4   0  235.38    8.80
   6  -4   0  227.88    9.20
   5  -4   0  484.15   15.60
   5  -4   0  477.25   14.20
   5  -4   0  480.85   16.10
   5  -4   0  474.75   14.10
   5  -4   0  460.95   15.40
   4  -4   0   13.30    1.30
   4  -4   0   11.60    1.20
   4  -4   0   12.40    0.90
   4  -4   0   13.30    1.50
   3  -4   0  177.68    6.50
   3  -4   0  172.08    6.30
   3  -4   0  174.38    5.90
   3  -4   0  184.78    6.10
  -3   4   0  171.18    6.10
   2  -4   0  828.42   23.40
   2  -4   0  787.42   23.60
   2  -4   0  770.72   23.60
  -2   4   0  789.92   23.70
  -2   4   0  745.23   23.20
   1  -4   0 1202.88   35.50
   1  -4   0 1191.18   34.90
   1  -4   0 1211.08   35.10
  -1   4   0 1175.68   34.90
  -1   4   0 1190.98   35.40
   0  -4   0   77.79    3.30
   0  -4   0   69.79    2.60
   0  -4   0   74.59    2.80
   0   4   0   65.19    2.60
   0   4   0   68.09    3.10
  -1  -4   0  344.17   11.60
  -1  -4   0  344.87   10.20
   1   4   0  349.27   10.30
  -2  -4   0  674.53   22.00
   2   4   0  727.63   21.50
  -3  -4   0  575.74   18.80
   3   4   0  577.24   18.10
  -4  -4   0   10.40    1.70
   4   4   0   10.10    1.50
  -5  -4   0  214.88    8.40
   5   4   0  196.18    8.00
  -6  -4   0  193.38    8.20
   6   4   0  189.38    8.00
  -7  -4   0   -0.40    1.10
   7   4   0    0.10    0.70
  -8  -4   0   19.00    3.30
   8   4   0   15.20    2.70
  -9  -4   0   88.99    5.00
   9   4   0   85.99    5.90
  10  -5   0   75.59    4.80
  10  -5   0   78.89    8.30
   9  -5   0  203.38    9.60
   9  -5   0  203.48    8.80
   8  -5   0   87.09    4.90
   8  -5   0   90.49    5.50
   7  -5   0  201.48    8.20
   7  -5   0  199.98    8.80
   6  -5   0  388.96   14.10
   6  -5   0  390.16   13.30
   6  -5   0  392.36   13.60
   5  -5   0  439.16   14.50
   5  -5   0  444.16   13.60
   5  -5   0  441.46   15.20
   5  -5   0  448.86   14.80
   4  -5   0  121.89    4.90
   4  -5   0  121.79    5.40
   4  -5   0  128.69    5.20
   4  -5   0  123.19    4.60
   3  -5   0  797.52   23.40
   3  -5   0  761.02   23.10
   3  -5   0  758.82   23.50
   3  -5   0  784.02   23.70
  -3   5   0  736.33   23.10
   2  -5   0 1037.70   31.00
   2  -5   0 1055.39   30.50
   2  -5   0  991.70   30.70
  -2   5   0 1033.50   30.40
   1  -5   0  402.66   12.30
   1  -5   0  388.46   12.40
   1  -5   0  412.66   13.10
  -1   5   0  391.86   12.50
   0  -5   0  290.47   10.00
   0  -5   0  283.27    9.20
   0  -5   0  290.37    8.90
   0   5   0  271.07    8.90
  -1  -5   0  631.34   18.90
  -1  -5   0  631.94   20.60
   1   5   0  672.33   19.00
  -2  -5   0 1096.09   33.90
   2   5   0 1101.09   33.00
  -3  -5   0  189.08    7.80
   3   5   0  191.38    7.10
  -4  -5   0  360.66   12.90
   4   5   0  337.27   12.00
  -5  -5   0  702.43   23.40
   5   5   0  718.13   22.90
  -6  -5   0   71.89    4.60
   6   5   0   79.39    4.40
  -7  -5   0  117.49    6.20
   7   5   0  117.29    6.10
  -8  -5   0  172.78    8.10
   8   5   0  170.48    8.20
  10  -6   0  137.99    7.80
  10  -6   0  126.99    9.20
   9  -6   0   57.39    4.00
   9  -6   0   57.19    4.60
   8  -6   0   19.60    2.70
   8  -6   0   20.20    2.90
   7  -6   0  250.77   10.40
   7  -6   0  250.07    9.90
   6  -6   0  297.87   11.60
   6  -6   0  315.27    9.80
   6  -6   0  292.97    9.50
   6  -6   0  309.27   12.90
   6  -6   0  312.57   10.90
   5  -6   0  112.69    4.40
   5  -6   0  112.29    5.10
   5  -6   0  104.99    5.30
   5  -6   0  109.59    4.70
   4  -6   0  117.09    5.20
   4  -6   0  113.09    5.00
   3  -6   0  776.62   24.10
   3  -6   0  798.12   24.20
   3  -6   0  791.52   23.70
  -3   6   0  764.12   23.60
   2  -6   0  825.62   24.60
   2  -6   0  814.62   24.30
   2  -6   0  833.82   25.10
  -2   6   0  755.92   24.10
   1  -6   0  563.54   18.40
   1  -6   0  572.14   17.50
   1  -6   0  574.14   17.50
   0  -6   0  629.04   19.80
   0  -6   0  607.94   18.30
   0  -6   0  583.04   18.60
   0   6   0  610.74   18.40
  -1  -6   0 1679.83   50.19
  -1  -6   0 1638.24   48.00
   1   6   0 1660.93   48.10
  -2  -6   0  120.19    5.80
  -3  -6   0  302.57   11.80
   3   6   0  319.67   10.90
  -4  -6   0  506.35   18.00
   4   6   0  523.35   17.20
  -5  -6   0  388.96   15.80
   5   6   0  414.46   14.20
  -6  -6   0   56.59    4.30
   6   6   0   66.39    4.10
  -7  -6   0  193.88    9.00
   7   6   0  189.28    8.50
  -8  -6   0  195.88    9.20
  10  -7   0   22.10    3.60
  10  -7   0   18.20    2.80
   9  -7   0    5.10    1.60
   9  -7   0    4.20    1.70
   8  -7   0   65.49    4.30
   8  -7   0   68.29    4.90
   7  -7   0   57.29    3.80
   7  -7   0   63.09    4.40
   6  -7   0   75.59    4.60
   6  -7   0   87.49    4.10
   6  -7   0   73.09    4.20
   6  -7   0   65.09    3.50
   5  -7   0  133.19    5.40
   5  -7   0  133.19    5.90
   5  -7   0  127.79    6.10
   5  -7   0  132.59    5.30
   4  -7   0  378.76   12.40
   4  -7   0  396.46   12.90
   4  -7   0  380.26   13.30
   4  -7   0  368.96   13.00
   3  -7   0  408.66   13.40
   3  -7   0  399.46   13.20
   3  -7   0  389.26   12.70
  -3   7   0  384.56   12.60
   2  -7   0   19.20    1.60
   2  -7   0   19.10    1.40
   2  -7   0   20.50    1.90
  -2   7   0   18.30    1.40
   1  -7   0  358.36   12.30
   1  -7   0  336.07   11.10
   1  -7   0  333.47   11.00
   0  -7   0  555.04   16.90
   0  -7   0  565.54   17.40
   0  -7   0  569.74   18.70
   0   7   0  535.85   17.00
  -1  -7   0   93.99    5.00
  -1  -7   0   94.49    3.40
  -1  -7   0   92.59    4.20
   1   7   0   97.19    3.40
  -2  -7   0  157.48    7.30
  -3  -7   0  546.45   19.20
  -4  -7   0  447.16   16.10
   4   7   0  409.76   14.70
  -5  -7   0   12.60    2.50
   5   7   0   13.40    2.00
  -6  -7   0   70.59    5.10
   6   7   0   64.49    4.20
  -7  -7   0  172.58    8.70
   7   7   0  174.78    8.10
   9  -8   0   23.50    3.60
   8  -8   0   24.40    3.50
   8  -8   0   30.70    2.80
   7  -8   0   39.50    2.80
   7  -8   0   38.70    3.20
   7  -8   0   50.59    3.90
   7  -8   0   44.70    3.00
   7  -8   0   43.50    3.00
   6  -8   0   25.40    2.20
   6  -8   0   25.20    2.50
   6  -8   0   29.70    3.00
   6  -8   0   27.30    2.00
   5  -8   0  122.89    5.10
   5  -8   0  116.99    5.70
   5  -8   0  120.59    8.00
   5  -8   0  121.69    5.30
   4  -8   0   53.09    3.50
   4  -8   0   49.50    3.10
   4  -8   0   46.40    2.60
   4  -8   0   47.70    3.00
   3  -8   0   77.39    3.90
   3  -8   0   77.79    4.20
   3  -8   0   76.29    3.80
   2  -8   0  121.89    5.10
   2  -8   0  123.59    5.80
   1  -8   0  149.49    5.80
   1  -8   0  158.48    5.90
   1  -8   0  160.68    7.10
   0  -8   0   77.69    3.20
   0  -8   0   73.59    3.60
   0  -8   0   78.39    4.60
  -1  -8   0   66.19    4.30
  -1  -8   0   67.29    2.60
  -1  -8   0   67.49    3.50
   1   8   0   64.99    2.70
  -2  -8   0  204.38    8.00
  -3  -8   0  182.28    8.70
  -4  -8   0   19.40    3.20
  -5  -8   0   12.90    2.70
   5   8   0   19.70    2.60
  -6  -8   0   65.99    5.20
   6   8   0   66.89    4.50
  -7  -8   0   19.60    3.40
   7   8   0   15.80    2.60
   9  -9   0    8.00    2.00
   9  -9   0    7.90    2.50
   8  -9   0   46.20    3.60
   8  -9   0   46.70    4.30
   7  -9   0   85.59    4.50
   7  -9   0   85.19    5.10
   7  -9   0   82.79    5.40
   7  -9   0   85.09    4.00
   6  -9   0   18.10    2.00
   6  -9   0   18.00    1.90
   6  -9   0   15.90    2.40
   6  -9   0   17.40    2.60
   5  -9   0    3.70    1.30
   5  -9   0    1.70    1.20
   5  -9   0    5.40    1.20
   5  -9   0    5.40    1.30
   4  -9   0  302.97   11.40
   4  -9   0  302.37   10.50
   4  -9   0  322.57   12.70
   3  -9   0  105.19    4.50
   3  -9   0  106.99    5.00
   3  -9   0  107.99    5.50
   2  -9   0   29.60    2.20
   2  -9   0   35.20    2.30
   2  -9   0   37.40    3.10
   1  -9   0  256.27    8.90
   1  -9   0  259.57   10.40
   1  -9   0  239.38    8.70
   0  -9   0  173.68    6.10
   0  -9   0  174.98   10.90
   0  -9   0  167.98    6.70
  -1  -9   0   57.49    3.30
  -1  -9   0   57.79    4.20
  -1  -9   0   61.39    2.40
   1   9   0   47.30    3.20
  -2  -9   0   30.80    3.20
  -2  -9   0   28.90    2.50
  -3  -9   0   55.99    4.60
  -4  -9   0   46.30    4.30
  -5  -9   0   12.70    2.60
  -6  -9   0   68.49    5.60
   8 -10   0  159.78    8.00
   8 -10   0  152.78    8.40
   7 -10   0   94.39    4.80
   7 -10   0  106.59    6.10
   7 -10   0   98.69    5.70
   7 -10   0   98.69    4.90
   6 -10   0    3.80    1.30
   6 -10   0    1.90    1.10
   6 -10   0    2.70    1.30
   6 -10   0    4.00    1.50
   5 -10   0  142.29    6.00
   5 -10   0  146.29    6.80
   5 -10   0  157.08    6.90
   5 -10   0  144.79    7.20
   4 -10   0  358.56   13.20
   4 -10   0  356.66   12.80
   4 -10   0  352.76   12.00
   3 -10   0   32.90    2.50
   3 -10   0   32.30    2.30
   3 -10   0   36.20    3.60
   2 -10   0  117.99    6.20
   2 -10   0  110.89    4.90
   2 -10   0  115.09    5.10
   1 -10   0  486.55   17.50
   1 -10   0  463.55   15.60
   1 -10   0  484.35   15.40
   0 -10   0  277.07   11.60
   0 -10   0  275.67    9.20
   0 -10   0  267.47    9.90
  -1 -10   0   53.29    2.40
  -1 -10   0   57.99    4.40
  -1 -10   0   56.79    3.40
  -2 -10   0  171.48    7.30
  -2 -10   0  160.58    8.60
  -3 -10   0  224.98    9.10
  -3 -10   0  193.98   10.00
  -4 -10   0    5.90    2.20
  -4 -10   0    6.90    1.80
  -5 -10   0   14.70    3.30
   8 -11   0   75.79    5.70
   8 -11   0   71.09    4.90
   7 -11   0   15.30    3.00
   7 -11   0   16.80    3.00
   7 -11   0   17.60    2.50
   7 -11   0   14.50    2.00
   6 -11   0  168.38    8.00
   6 -11   0  169.48    7.60
   6 -11   0  171.38    7.00
   6 -11   0  179.68    8.60
   5 -11   0  336.57   13.20
   5 -11   0  321.27   11.30
   5 -11   0  335.57   12.80
   5 -11   0  330.37   12.50
   4 -11   0  128.49    6.70
   4 -11   0  121.49    5.90
   4 -11   0  126.49    5.30
   3 -11   0   94.59    4.80
   3 -11   0   98.99    5.80
   3 -11   0   96.89    4.40
   2 -11   0  143.19    6.30
   2 -11   0  156.18    6.30
   2 -11   0  165.88    8.00
   1 -11   0  242.38    8.50
   1 -11   0  220.88   10.30
   1 -11   0  232.58    8.70
   0 -11   0  104.29    4.30
   0 -11   0   95.59    6.10
   0 -11   0  104.19    5.00
  -1 -11   0  201.98    9.90
  -1 -11   0  196.28    8.00
  -2 -11   0  370.06   14.40
  -2 -11   0  372.06   15.50
  -3 -11   0  117.09    6.10
  -3 -11   0   98.99    6.80
  -4 -11   0   77.19    5.00
  -4 -11   0   70.09    6.30
   7 -12   0   35.40    3.50
   7 -12   0   34.40    4.60
   6 -12   0  151.98    7.60
   6 -12   0  160.28    6.50
   6 -12   0  169.88    7.80
   6 -12   0  162.78    8.50
   5 -12   0   89.39    5.10
   5 -12   0   85.19    4.30
   5 -12   0   87.29    5.50
   5 -12   0   92.19    5.90
   4 -12   0   11.20    2.50
   4 -12   0    7.30    1.40
   4 -12   0    6.60    1.60
   3 -12   0  188.18    8.00
   3 -12   0  189.08    9.20
   3 -12   0  199.38    7.50
   2 -12   0  136.79    6.30
   2 -12   0  147.79    6.20
   2 -12   0  160.58    8.10
   1 -12   0   67.29    3.90
   1 -12   0   70.79    5.20
   1 -12   0   68.49    3.60
   0 -12   0   64.19    5.20
   0 -12   0   72.89    3.30
   0 -12   0   66.59    4.00
  -1 -12   0  220.88   11.00
  -1 -12   0  218.88    9.00
  -2 -12   0  115.39    6.00
  -2 -12   0  119.29   11.00
  -3 -12   0   21.40    3.60
  -3 -12   0   24.90    3.00
   5 -13   0    3.40    1.20
   5 -13   0   -0.10    2.30
   5 -13   0    1.80    1.70
   5 -13   0    2.90    1.50
   4 -13   0   21.80    2.90
   4 -13   0   21.50    3.30
   4 -13   0   26.90    2.40
   3 -13   0   71.49    3.80
   3 -13   0   68.99    4.20
   3 -13   0   72.59    5.40
   2 -13   0   34.60    2.70
   2 -13   0   29.80    3.40
   2 -13   0   24.70    2.50
   1 -13   0   31.40    2.50
   1 -13   0   30.00    2.80
   1 -13   0   26.60    4.00
   0 -13   0  112.09    5.60
  -1 -13   0   52.69    4.00
  -1 -13   0   59.49    5.30
   0 -14   1   -1.10    1.40
   0 -14   1    1.40    1.90
   1 -14   1   44.80    3.30
   1 -14   1   56.19    3.40
   1 -14   1   52.69    4.90
   2 -14   1   78.99    4.30
   2 -14   1   75.49    3.90
   3 -14   1   11.60    2.10
   3 -14   1   13.20    2.70
   4 -14   1   15.20    2.90
   4 -14   1   11.20    2.00
  -2 -13   1    9.50    2.20
  -2 -13   1   10.20    2.00
  -1 -13   1   20.50    2.50
  -1 -13   1   20.00    5.00
   0 -13   1   10.50    1.80
   0 -13   1   12.70    2.80
   0 -13   1   11.40    1.60
   1 -13   1   29.00    2.50
   1 -13   1   30.00    2.30
   1 -13   1   17.80    3.20
   2 -13   1   26.60    3.20
   2 -13   1   30.40    2.50
   2 -13   1   32.10    2.40
   3 -13   1   16.40    2.30
   3 -13   1   15.60    2.90
   4 -13   1   33.50    3.00
   4 -13   1   30.40    3.50
   5 -13   1    8.40    2.00
   5 -13   1    9.60    2.10
   5 -13   1   15.80    4.60
   6 -13   1   10.30    2.40
   6 -13   1   10.80    2.30
   6 -13   1   11.10    2.60
  -4 -12   1   23.00    4.00
  -4 -12   1   28.90    3.20
  -3 -12   1   18.50    2.90
  -3 -12   1   20.60    5.70
  -2 -12   1  128.69    8.00
  -2 -12   1  136.59    6.40
  -1 -12   1   99.59    6.60
  -1 -12   1  107.29    5.20
  -1 -12   1  108.29    4.30
   0 -12   1    6.30    1.10
   0 -12   1    4.30    1.60
   0 -12   1    6.30    1.50
   1 -12   1  134.49    5.70
   1 -12   1  143.59    7.60
   1 -12   1  129.99    5.60
   2 -12   1   88.39    4.00
   2 -12   1   85.59    5.60
   2 -12   1   86.89    4.40
   3 -12   1   19.60    1.70
   3 -12   1   16.90    2.80
   3 -12   1   18.50    2.00
   4 -12   1   31.30    2.70
   4 -12   1   29.90    2.20
   4 -12   1   28.10    3.10
   5 -12   1   83.29    5.50
   5 -12   1   74.99    3.60
   5 -12   1   79.49    5.00
   5 -12   1   72.89    4.60
   6 -12   1   31.80    3.20
   6 -12   1   25.30    3.60
   6 -12   1   28.60    3.00
   7 -12   1   11.30    2.40
   7 -12   1    7.40    2.40
   7 -12   1    8.10    2.20
  -5 -11   1   93.19    5.70
  -5 -11   1   75.89    6.20
  -4 -11   1   40.70    4.40
  -4 -11   1   37.80    3.40
  -3 -11   1  276.77   10.70
  -3 -11   1  258.27   12.30
  -2 -11   1  232.68   11.00
  -2 -11   1  234.98    9.20
  -1 -11   1  102.09    4.90
  -1 -11   1  105.29    6.40
  -1 -11   1  105.79    4.00
   0 -11   1  228.88    8.70
   0 -11   1  248.48    8.30
   0 -11   1  232.48   10.60
   1 -11   1  163.08    8.20
   1 -11   1  168.58    6.50
   1 -11   1  171.68    6.60
   2 -11   1   30.00    2.10
   2 -11   1   29.70    2.40
   2 -11   1   35.10    3.40
   3 -11   1   81.09    3.60
   3 -11   1   71.39    4.10
   3 -11   1   72.09    4.80
   4 -11   1  379.76   14.10
   4 -11   1  398.26   12.80
   4 -11   1  410.16   14.90
   5 -11   1  185.18    8.30
   5 -11   1  205.58    9.00
   5 -11   1  187.78    7.00
   6 -11   1   12.30    2.40
   6 -11   1   10.60    2.10
   6 -11   1   11.90    2.00
   6 -11   1   10.00    1.50
   7 -11   1   48.00    4.30
   7 -11   1   39.50    3.30
   7 -11   1   42.60    3.60
   8 -11   1   67.39    5.60
   8 -11   1   72.39    5.00
  -6 -10   1  121.59   11.10
  -5 -10   1   51.89    4.70
  -4 -10   1  236.68   11.30
  -3 -10   1  301.97   11.90
  -3 -10   1  290.87   12.80
  -2 -10   1   67.19    4.90
  -2 -10   1   61.59    3.70
  -1 -10   1  101.09    4.70
  -1 -10   1   96.29    5.90
   0 -10   1  250.47   10.70
   0 -10   1  243.08    8.90
   0 -10   1  258.17    8.60
   1 -10   1  703.93   22.50
   1 -10   1  729.63   22.60
   1 -10   1  754.92   24.70
   2 -10   1   20.50    1.80
   2 -10   1   16.50    1.50
   3 -10   1  308.47   11.10
   3 -10   1  307.97   11.90
   4 -10   1  435.56   15.60
   4 -10   1  430.96   15.40
   4 -10   1  434.26   14.90
   4 -10   1  444.46   15.20
   5 -10   1   16.40    1.60
   5 -10   1   16.60    2.40
   5 -10   1   16.10    2.50
   5 -10   1   18.90    2.20
   6 -10   1   97.89    5.00
   6 -10   1   99.49    6.00
   6 -10   1   95.69    5.40
   6 -10   1  102.59    4.50
   7 -10   1  244.38   10.10
   7 -10   1  222.98   10.50
   7 -10   1  235.98    8.90
   8 -10   1  105.89    6.60
   8 -10   1  100.49    8.50
   6   9  -1   27.70    2.90
  -6  -9   1   30.70    4.30
  -5  -9   1   70.49    5.30
  -4  -9   1  242.18   11.00
  -3  -9   1   95.89    5.90
  -2  -9   1   74.39    5.00
  -2  -9   1   76.09    4.00
   1   9  -1  476.05   16.00
  -1  -9   1  541.65   16.00
  -1  -9   1  550.34   18.90
  -1  -9   1  530.75   17.00
   0  -9   1  391.56   12.40
   0  -9   1  395.56   14.40
   0  -9   1  372.26   12.60
   1  -9   1   44.40    2.80
   1  -9   1   44.50    2.50
   1  -9   1   43.30    3.30
   2  -9   1  204.68    7.30
   2  -9   1  214.98    8.80
   2  -9   1  215.88    7.90
   3  -9   1  482.55   16.10
   3  -9   1  552.64   17.80
   3  -9   1  529.55   17.20
   4  -9   1  120.09    5.80
   4  -9   1  120.39    5.60
   4  -9   1  109.69    6.40
   5  -9   1  159.68    6.20
   5  -9   1  159.88    7.10
   5  -9   1  165.58    6.90
   5  -9   1  165.78    7.50
   6  -9   1  209.98    9.50
   6  -9   1  226.98    8.10
   6  -9   1  210.28    8.20
   6  -9   1  215.98    9.10
   7  -9   1  196.68    7.40
   7  -9   1  190.88    8.60
   7  -9   1  203.18    9.40
   8  -9   1    8.80    2.20
   8  -9   1    7.80    1.80
   9  -9   1   81.49    5.90
   9  -9   1   74.59    5.10
   7   8  -1   18.20    2.90
  -7  -8   1   15.50    3.00
   6   8  -1   39.80    3.30
  -6  -8   1   45.50    4.20
   5   8  -1   77.69    4.50
  -5  -8   1   69.49    5.10
  -4  -8   1  118.49    6.60
  -3  -8   1   64.59    4.40
  -2  -8   1  307.97   12.10
   1   8  -1  349.57   11.30
  -1  -8   1  362.26   12.10
  -1  -8   1  367.46   11.30
  -1  -8   1  370.36   13.50
   0  -8   1   53.09    2.70
   0  -8   1   56.09    3.70
   0  -8   1   56.39    2.60
   1  -8   1  188.48    6.40
   1  -8   1  175.28    6.60
   1  -8   1  181.88    7.60
   2  -8   1  404.86   13.40
   2  -8   1  404.06   12.80
   2  -8   1  403.86   14.00
  -3   8  -1   59.09    2.70
   3  -8   1   62.19    3.50
   3  -8   1   58.89    2.70
   3  -8   1   55.29    3.20
  -4   8  -1   22.30    1.90
   4  -8   1   23.00    2.00
   4  -8   1   21.50    1.60
   4  -8   1   22.40    2.10
   4  -8   1   25.30    2.50
   5  -8   1   26.40    2.40
   5  -8   1   29.10    2.20
   5  -8   1   28.90    4.70
   5  -8   1   24.00    1.90
   6  -8   1  131.89    5.60
   6  -8   1  131.39    6.30
   6  -8   1  132.79    5.40
   6  -8   1  138.99    6.80
   7  -8   1   10.60    2.20
   7  -8   1   11.50    2.10
   7  -8   1    9.40    1.90
   8  -8   1   34.30    3.20
   8  -8   1   35.80    3.50
   9  -8   1   86.99    6.70
   9  -8   1   86.79    6.10
   8   7  -1   66.69    4.60
  -8  -7   1   67.69    5.10
   7   7  -1   75.29    4.70
  -7  -7   1   62.79    5.00
   6   7  -1   15.00    2.30
  -6  -7   1   11.70    2.40
   5   7  -1  117.49    5.70
  -5  -7   1  119.69    6.50
   4   7  -1  183.38    8.20
  -4  -7   1  177.08    8.20
   3   7  -1  166.48    6.70
  -3  -7   1  163.28    7.50
  -2  -7   1   59.69    3.80
   1   7  -1  140.49    5.00
  -1  -7   1  148.89    6.60
  -1  -7   1  151.08    5.00
   0   7  -1  204.98    7.10
   0  -7   1  209.08    7.10
   0  -7   1  208.78    7.20
   0  -7   1  217.38    8.30
   1  -7   1   13.30    1.10
   1  -7   1   13.90    1.50
   1  -7   1   13.40    1.20
   2  -7   1   30.00    2.20
   2  -7   1   31.40    1.70
   2  -7   1   30.10    2.00
  -3   7  -1  261.07    8.70
   3  -7   1  271.47    8.80
   3  -7   1  287.57    9.70
   3  -7   1  257.87    9.50
  -4   7  -1   45.90    2.40
   4  -7   1   49.99    3.20
   4  -7   1   49.50    2.50
   4  -7   1   50.69    2.80
   4  -7   1   53.99    3.10
   5  -7   1   66.79    3.30
   5  -7   1   66.89    3.80
   5  -7   1   65.39    4.00
   5  -7   1   62.19    3.20
   6  -7   1  101.39    4.90
   6  -7   1   75.39    4.20
   6  -7   1   96.09    5.20
   7  -7   1   54.29    2.50
   7  -7   1   56.89    4.20
   7  -7   1   55.49    3.80
   8  -7   1   19.30    3.10
   8  -7   1   15.90    2.40
   9  -7   1    4.90    1.80
   9  -7   1    3.60    1.10
  10  -7   1   10.00    2.50
  10  -7   1   14.10    2.40
   8   6  -1  171.48    8.30
  -8  -6   1  179.88    8.40
   7   6  -1   27.70    2.70
  -7  -6   1   20.80    3.20
   6   6  -1  133.79    6.40
  -6  -6   1  141.29    9.60
   5   6  -1  687.03   22.30
  -5  -6   1  681.13   23.00
   4   6  -1  259.37    9.70
  -4  -6   1  265.97   10.50
   3   6  -1   43.40    2.60
  -3  -6   1   41.30    3.00
  -2  -6   1  495.55   16.70
   1   6  -1  664.83   19.70
  -1  -6   1  656.63   21.30
  -1  -6   1  668.33   19.70
   0   6  -1  411.86   13.00
   0  -6   1  417.36   13.00
   0  -6   1  426.56   13.00
   0  -6   1  424.06   14.10
   1  -6   1  281.87    9.40
   1  -6   1  293.77    9.10
   1  -6   1  290.87   10.10
  -2   6  -1  543.55   16.40
   2  -6   1  550.04   17.30
   2  -6   1  523.45   17.00
   2  -6   1  561.34   16.50
  -3   6  -1  199.48    7.80
   3  -6   1  248.68    7.70
   3  -6   1  249.38    8.50
   3  -6   1  239.98    8.20
  -4   6  -1   97.69    4.00
   4  -6   1   88.89    4.40
   4  -6   1   99.09    4.00
   4  -6   1   98.29    4.70
   4  -6   1  107.59    5.40
   5  -6   1  254.67   10.10
   5  -6   1  269.47    8.90
   5  -6   1  277.77    9.90
   5  -6   1  273.27    9.40
   6  -6   1  194.68    7.10
   6  -6   1  193.28    6.70
   6  -6   1  201.28    8.50
   7  -6   1   21.40    2.30
   7  -6   1   26.90    2.80
   8  -6   1   14.80    2.50
   8  -6   1   23.40    2.40
   9  -6   1   89.59    5.90
   9  -6   1   84.69    5.00
  10  -6   1   38.60    6.00
  10  -6   1   36.60    3.70
   9   5  -1  137.19    7.40
  -9  -5   1  138.49    6.80
   8   5  -1   58.89    4.30
  -8  -5   1   61.89    4.30
   7   5  -1   79.99    4.70
  -7  -5   1   77.59    4.90
   6   5  -1  641.74   21.20
  -6  -5   1  636.84   21.40
   5   5  -1  531.45   17.20
  -5  -5   1  494.65   17.50
   4   5  -1  142.79    5.90
  -4  -5   1  144.09    6.40
   3   5  -1  816.72   25.40
  -3  -5   1  837.62   26.10
   2   5  -1 1229.18   36.40
  -2  -5   1 1210.08   37.10
   1   5  -1 1025.60   30.90
  -1  -5   1 1097.79   30.90
  -1  -5   1 1050.59   32.20
   0   5  -1  819.52   23.80
   0  -5   1  806.12   23.80
   0  -5   1  825.42   24.70
   0  -5   1  756.12   23.70
  -1   5  -1 1386.46   40.00
   1  -5   1 1318.67   39.90
   1  -5   1 1397.86   39.50
   1  -5   1 1320.67   41.90
  -2   5  -1  684.13   21.30
   2  -5   1  724.43   22.00
   2  -5   1  736.83   22.10
   2  -5   1  745.63   21.40
  -3   5  -1  302.47    9.60
   3  -5   1  295.07    9.50
   3  -5   1  304.57    9.80
   3  -5   1  298.87   10.10
   3  -5   1  298.07   10.20
  -4   5  -1  894.01   27.10
   4  -5   1  894.71   27.90
   4  -5   1  898.01   27.10
   4  -5   1  906.91   27.60
   5  -5   1  652.73   20.60
   5  -5   1  656.13   21.10
   5  -5   1  629.84   19.30
   6  -5   1  307.67   10.80
   6  -5   1  284.77    9.20
   6  -5   1  290.17    9.20
   6  -5   1  293.67   11.20
   7  -5   1   23.50    2.60
   7  -5   1   22.90    2.20
   8  -5   1  208.48    9.40
   8  -5   1  196.88    8.40
   9  -5   1  142.49    7.70
   9  -5   1  141.49    6.80
  10  -5   1   20.30    3.30
  10  -5   1   20.60    2.80
   9   4  -1   71.89    5.30
  -9  -4   1   81.69    4.50
   8   4  -1    3.30    1.40
  -8  -4   1    4.10    1.40
   7   4  -1  193.58    8.20
  -7  -4   1  186.18    7.70
  -7  -4   1  171.28    6.20
  -6  -4   1  423.46   14.70
  -6  -4   1  421.56   13.30
   5   4  -1  107.99    5.10
  -5  -4   1  115.89    5.30
  -5  -4   1  108.69    3.80
  -4  -4   1  362.96   12.60
   3   4  -1  531.35   17.00
  -3  -4   1  550.14   17.50
   2   4  -1  323.07   11.00
  -2  -4   1  357.76   11.60
  -2  -4   1  351.76   10.20
   1   4  -1  190.88    6.60
   1   4  -1  201.38    5.90
  -1  -4   1  180.48    6.80
  -1  -4   1  182.48    6.30
  -1  -4   1  179.18    5.80
   0   4  -1 1759.62   50.79
   0  -4   1 1780.32   51.39
   0  -4   1 1704.93   50.69
   0  -4   1 1762.92   50.79
  -1   4  -1 2018.20   60.39
   1  -4   1 2126.29   60.99
   1  -4   1 2154.38   60.49
   1  -4   1 2095.79   61.19
  -2   4  -1  855.51   25.20
   2  -4   1  876.51   25.90
   2  -4   1  845.62   25.20
  -3   4  -1  369.66   12.00
   3  -4   1  390.66   12.60
   3  -4   1  387.76   12.00
   3  -4   1  390.46   12.40
  -4   4  -1  870.81   26.20
   4  -4   1  889.11   26.50
   4  -4   1  858.71   26.10
   4  -4   1  843.92   26.80
   4  -4   1  861.31   25.50
   5  -4   1  386.56   13.50
   5  -4   1  376.86   11.80
   5  -4   1  394.76   13.00
   6  -4   1  158.48    7.00
   6  -4   1  154.98    6.40
   6  -4   1  153.18    5.20
   7  -4   1  433.86   16.50
   7  -4   1  433.26   15.70
   8  -4   1  308.57   12.60
   8  -4   1  321.57   11.80
   9  -4   1   82.99    4.70
   9  -4   1   69.09    4.90
  10  -4   1   28.80    5.90
  10  -4   1   22.20    2.40
   9   3  -1   14.00    2.60
  -9  -3   1   16.20    2.00
   8   3  -1    3.70    1.40
  -8  -3   1    3.90    1.30
   7   3  -1  237.28    9.70
  -7  -3   1  246.98    9.10
   6   3  -1    4.30    1.20
  -6  -3   1    5.50    1.00
  -6  -3   1    6.60    1.40
   5   3  -1   86.09    4.20
  -5  -3   1   86.39    4.10
   4   3  -1  353.06   12.00
  -4  -3   1  361.86   12.10
  -4  -3   1  357.46   10.90
   3   3  -1  745.93   22.40
   3   3  -1  740.33   22.30
  -3  -3   1  717.03   21.30
  -3  -3   1  721.63   22.50
   2   3  -1  226.58    7.60
   2   3  -1  230.08    7.50
  -2  -3   1  219.48    7.50
  -2  -3   1  225.18    7.70
   1   3  -1  321.27   10.50
  -1  -3   1  349.37   10.10
  -1  -3   1  351.96   10.90
   0   3  -1  412.16   12.90
   0  -3   1  444.06   13.30
   0  -3   1  437.46   12.90
  -1   3  -1  155.38    4.70
  -1   3  -1  157.18    5.10
   1  -3   1  145.39    5.10
   1  -3   1  150.48    4.70
  -2   3  -1  258.57    8.50
  -2   3  -1  270.57    8.10
   2  -3   1  257.67    8.50
   2  -3   1  262.57    8.50
   2  -3   1  259.17    8.10
  -3   3  -1  641.14   19.10
   3  -3   1  609.54   18.90
   3  -3   1  637.84   18.50
   3  -3   1  608.04   19.10
   4  -3   1  862.21   25.60
   4  -3   1  867.71   26.90
   4  -3   1  886.21   26.50
   5  -3   1   21.90    1.70
   5  -3   1   24.00    2.10
   5  -3   1   19.60    1.20
   6  -3   1  350.76   12.50
   6  -3   1  334.17   11.70
   6  -3   1  333.37   10.50
   7  -3   1  232.98   10.60
   7  -3   1  240.68    9.00
   8  -3   1  155.58    6.70
   8  -3   1  146.89    7.40
   9  -3   1   14.70    2.60
   9  -3   1   11.90    1.90
  10  -3   1   89.99    5.00
  10   2  -1    2.00    1.20
   9   2  -1   15.30    2.80
  -9  -2   1   17.00    1.60
   8   2  -1   21.70    3.00
  -8  -2   1   25.30    2.00
   7   2  -1   62.39    3.90
  -7  -2   1   58.29    3.10
   6   2  -1  136.79    6.10
  -6  -2   1  132.39    5.40
   5   2  -1  453.25   14.90
   5   2  -1  440.96   14.10
  -5  -2   1  447.36   13.90
   4   2  -1  649.83   20.00
   4   2  -1  628.84   19.40
  -4  -2   1  624.44   19.00
  -4  -2   1  642.44   19.70
   3   2  -1   46.50    2.60
   3   2  -1   40.30    2.10
  -3  -2   1   51.49    2.40
  -3  -2   1   50.99    1.90
   2   2  -1  146.69    5.20
   2   2  -1  144.59    5.10
  -2  -2   1  160.38    5.30
  -2  -2   1  155.48    4.70
  -2  -2   1  154.78    5.30
   1   2  -1  309.77    9.40
  -1  -2   1  306.47    9.40
  -1  -2   1  304.57    9.50
   0   2  -1  287.87    8.40
   0  -2   1  272.27    8.40
  -1   2  -1  412.76   11.50
  -1   2  -1  409.26   11.90
   1  -2   1  378.06   11.50
   1  -2   1  375.46   11.90
  -2   2  -1  206.48    7.30
  -2   2  -1  209.98    7.40
  -2   2  -1  206.98    7.10
   2  -2   1  244.78    7.60
   2  -2   1  245.88    7.00
   2  -2   1  257.67    7.50
  -3   2  -1  285.47    9.60
  -3   2  -1  300.37    9.70
  -3   2  -1  276.37    9.80
   3  -2   1  315.57    9.20
   3  -2   1  311.67    9.70
   3  -2   1  315.07   10.10
   4  -2   1   14.70    1.20
   4  -2   1   12.50    1.40
   4  -2   1   12.50    0.90
   5  -2   1   69.59    3.30
   5  -2   1   68.79    2.80
   5  -2   1   65.59    3.70
   6  -2   1   63.79    3.40
   6  -2   1   66.49    3.90
   6  -2   1   63.69    2.70
   7  -2   1  112.99    8.10
   7  -2   1   95.89    3.70
   7  -2   1  101.09    4.70
   8  -2   1   36.90    3.30
   9  -2   1   53.79    3.60
   9  -2   1   53.49    4.30
  10  -2   1   71.19    7.80
  10  -2   1   75.59    4.40
  10   1  -1   52.69    5.60
   9   1  -1    5.50    1.60
   8   1  -1  176.18    8.20
  -8  -1   1  193.08    6.50
   7   1  -1  176.58   10.20
   7   1  -1  158.48    6.20
  -7  -1   1  160.08    5.80
   6   1  -1  223.98    8.80
   6   1  -1  231.98    8.00
  -6  -1   1  229.08    7.70
   5   1  -1  214.78    7.30
   5   1  -1  220.18    8.30
   5   1  -1  228.88    7.50
  -5  -1   1  221.38    7.40
   4   1  -1  690.63   20.90
   4   1  -1  702.03   21.80
   4   1  -1  709.73   21.00
  -4  -1   1  710.63   21.10
  -4  -1   1  695.43   21.00
   3   1  -1 1012.50   29.50
   3   1  -1  991.90   30.00
   3   1  -1 1001.60   29.50
  -3  -1   1  995.90   29.40
  -3  -1   1 1008.70   30.20
  -3  -1   1  997.10   30.00
  -3  -1   1 1029.00   29.60
   2   1  -1   73.09    2.60
   2   1  -1   77.09    3.00
   2   1  -1   76.49    2.70
  -2  -1   1   78.09    2.80
  -2  -1   1   81.59    2.70
  -2  -1   1   78.89    3.10
  -2  -1   1   76.89    3.00
   1   1  -1   20.70    0.90
  -1  -1   1   14.50    0.80
  -1  -1   1   15.10    0.80
   0  -1   1 1053.59   48.70
  -1   1  -1   47.50    2.00
  -1   1  -1   48.60    2.00
  -1   1  -1   49.99    1.90
   1  -1   1   63.49    2.20
   1  -1   1   65.59    2.00
   1  -1   1   64.29    2.10
  -2   1  -1  543.35   15.60
  -2   1  -1  529.95   15.90
  -2   1  -1  522.05   16.00
   2  -1   1  522.15   15.60
   2  -1   1  517.75   16.10
   2  -1   1  534.05   15.80
  -3   1  -1 1187.78   34.40
  -3   1  -1 1216.18   34.10
  -3   1  -1 1151.58   34.60
  -3   1  -1 1121.99   34.70
   3  -1   1 1145.59   34.10
   3  -1   1 1169.18   34.80
   3  -1   1 1177.08   34.40
  -4   1  -1  545.05   15.30
   4  -1   1  484.65   15.40
   4  -1   1  508.85   16.30
   4  -1   1  486.45   16.10
  -5   1  -1  147.79    5.00
   5  -1   1  136.59    5.10
   5  -1   1  144.49    5.40
   5  -1   1  141.79    6.00
  -6   1  -1   51.99    2.40
   6  -1   1   56.79    2.90
   6  -1   1   56.09    3.50
   6  -1   1   54.59    2.60
  -7   1  -1  219.28    7.10
   7  -1   1  218.18    8.00
   7  -1   1  193.38    7.20
   7  -1   1  218.78    9.30
   8  -1   1   53.59    3.10
   8  -1   1   44.30    3.60
   8  -1   1   39.40    2.40
   9  -1   1   33.10    3.30
   9  -1   1   38.10    2.90
  10  -1   1   43.10    4.00
  10  -1   1   40.60    3.10
  10   0  -1   56.59    4.80
   9   0  -1   57.09    3.50
   9   0  -1   58.49    4.30
   8   0  -1  333.27   11.80
   8   0  -1  342.97   13.00
   7   0  -1  450.55   14.70
   7   0  -1  441.36   15.70
   6   0  -1  225.28    8.90
   6   0  -1  230.78    8.20
  -6   0   1  232.88    7.30
   5   0  -1 1067.69   31.90
   5   0  -1 1023.60   32.60
  -5   0   1 1108.29   31.20
   4   0  -1 1133.09   33.40
   4   0  -1 1104.69   33.90
   4   0  -1 1119.09   32.70
  -4   0   1 1171.78   32.80
  -4   0   1 1101.59   33.30
   3   0  -1  342.77   10.90
   3   0  -1  345.27   10.90
   3   0  -1  353.66   10.50
  -3   0   1  325.67   10.50
  -3   0   1  331.37   10.90
  -3   0   1  341.27   10.10
  -3   0   1  326.87   10.80
   2   0  -1  747.63   23.10
   2   0  -1  761.12   23.40
   2   0  -1  758.92   23.30
  -2   0   1  811.22   23.40
  -2   0   1  822.12   23.20
  -2   0   1  812.62   22.80
  -2   0   1  808.32   23.40
   1   0  -1 2244.68   85.89
  -1   0   1 2472.15   87.69
  -1   0  -1  149.99    4.70
  -1   0  -1  145.69    4.90
  -1   0  -1  155.68    4.90
   1   0   1  154.28    4.90
   1   0   1  159.88    4.70
   1   0   1  157.68    4.90
  -2   0  -1  496.55   15.00
  -2   0  -1  486.45   14.80
  -2   0  -1  467.75   15.10
   2   0   1  509.25   15.00
   2   0   1  523.25   14.80
   2   0   1  501.55   15.20
  -3   0  -1 2229.88   62.69
  -3   0  -1 2050.89   62.99
  -3   0  -1 2179.28   62.49
   3   0   1 2158.48   62.69
   3   0   1 2160.48   62.39
  -4   0  -1  440.56   14.60
  -4   0  -1  473.55   14.70
   4   0   1  493.05   15.40
   4   0   1  496.05   14.60
  -5   0  -1  114.49    4.40
   5   0   1  109.59    4.30
   5   0   1  103.89    4.40
   5   0   1  115.99    5.10
  -6   0  -1  714.83   22.00
   6   0   1  703.53   23.00
   6   0   1  709.83   21.90
  -7   0  -1  120.49    4.90
   7   0   1  130.59    5.30
   7   0   1  132.69    6.30
  -8   0  -1   26.70    1.80
   8   0   1   27.30    2.20
   8   0   1   25.60    2.80
  -9   0  -1  172.98    6.10
   9   0   1  169.88    8.30
   9   0   1  172.28    7.60
  10   0   1  144.69    7.80
  10  -1  -1   53.29    4.30
  10  -1  -1   49.30    3.50
   9  -1  -1  110.59    6.30
   9  -1  -1  117.79    5.50
   8  -1  -1  318.87   11.40
   8  -1  -1  317.67   12.40
   7  -1  -1   39.80    3.10
   7  -1  -1   36.20    2.50
   6  -1  -1  378.76   13.10
   6  -1  -1  359.06   12.30
   5  -1  -1 1885.01   54.99
   5  -1  -1 1844.82   55.59
   4  -1  -1  609.64   19.50
   4  -1  -1  636.84   19.70
   4  -1  -1  634.94   19.20
   3  -1  -1   98.69    4.00
   3  -1  -1  100.19    4.00
   3  -1  -1  101.69    3.80
  -3   1   1  104.89    3.80
  -3   1   1  101.39    4.00
  -3   1   1  104.69    4.00
  -2   1   1 7427.56  267.87
   1  -1  -1 2838.72  117.39
  -1   1   1 2806.62  117.39
   0  -1  -1   44.20    1.60
   0  -1  -1   44.20    1.70
   0  -1  -1   44.90    1.40
   0   1   1   33.10    1.30
   0   1   1   32.30    1.60
  -1  -1  -1  890.11   24.70
  -1  -1  -1  912.51   25.00
   1   1   1  798.32   24.20
   1   1   1  800.32   24.60
   1   1   1  810.52   24.90
  -2  -1  -1 2600.04  140.79
   2   1   1 2699.73  143.29
  -3  -1  -1  668.03   19.70
  -3  -1  -1  672.43   20.40
   3   1   1  659.13   20.30
   3   1   1  663.33   19.60
  -4  -1  -1  520.95   15.90
  -4  -1  -1  535.75   16.50
   4   1   1  533.15   15.80
   4   1   1  507.35   16.50
   4   1   1  522.65   16.80
  -5  -1  -1 1586.34   49.20
  -5  -1  -1 1724.13   49.80
   5   1   1 1728.73   49.20
   5   1   1 1685.53   50.39
  -6  -1  -1  483.95   15.50
   6   1   1  479.15   15.00
   6   1   1  467.35   16.30
  -7  -1  -1   16.70    1.70
   7   1   1   14.80    1.40
   7   1   1   14.30    2.20
  -8  -1  -1  141.99    5.80
   8   1   1  141.59    5.70
   8   1   1  145.99    7.20
  -9  -1  -1  421.46   13.60
   9   1   1  404.06   15.80
  10   1   1   41.10    3.90
  10  -2  -1   42.50    3.30
  10  -2  -1   44.20    4.10
   9  -2  -1  211.28    8.60
   9  -2  -1  204.38    9.40
   8  -2  -1   12.60    2.40
   8  -2  -1    9.70    1.70
   7  -2  -1   56.39    3.20
   7  -2  -1   47.30    3.50
   6  -2  -1  543.05   17.90
   6  -2  -1  518.25   17.10
   5  -2  -1  803.82   25.20
   5  -2  -1  807.22   24.90
   5  -2  -1  818.32   25.50
   4  -2  -1   91.99    4.10
   4  -2  -1   84.09    3.80
   4  -2  -1   85.49    3.70
   3  -2  -1  631.64   18.20
   3  -2  -1  647.04   18.40
   3  -2  -1  651.53   18.20
  -3   2   1  543.05   18.00
  -3   2   1  531.55   18.00
  -3   2   1  548.55   18.10
   2  -2  -1 9847.81  353.36
  -2   2   1 9999.00  355.26
   1  -2  -1  502.45   14.50
   1  -2  -1  462.45   14.50
   1  -2  -1  462.65   14.40
  -1   2   1  482.65   14.40
  -1   2   1  489.95   14.50
  -1   2   1  490.75   14.40
   0  -2  -1  108.99    3.40
   0  -2  -1  111.49    3.60
   0  -2  -1  108.09    4.00
   0  -2  -1  100.79    3.70
   0   2   1  110.79    4.00
   0   2   1  110.09    3.40
   1   2   1 3415.86  158.38
   1   2   1 3490.15  163.88
  -2  -2  -1  629.04   19.70
  -2  -2  -1  630.44   20.00
   2   2   1  677.43   19.70
   2   2   1  660.83   20.00
  -3  -2  -1   65.99    3.50
  -3  -2  -1   64.29    2.10
   3   2   1   58.79    2.90
   3   2   1   59.19    2.10
   3   2   1   52.89    3.40
  -4  -2  -1  714.03   21.90
  -4  -2  -1  698.73   20.60
   4   2   1  680.33   21.70
   4   2   1  687.33   20.50
  -5  -2  -1  573.94   18.50
   5   2   1  570.24   17.20
   5   2   1  572.74   18.70
  -6  -2  -1  101.89    4.10
  -6  -2  -1  116.69    5.10
   6   2   1  106.89    4.60
   6   2   1  106.39    5.30
  -7  -2  -1   48.80    3.10
   7   2   1   46.80    3.40
  -8  -2  -1  198.58    7.70
   8   2   1  182.68    8.60
  -9  -2  -1  171.08    6.80
   9   2   1  156.68    8.00
  10  -3  -1   45.60    3.40
  10  -3  -1   48.30    4.30
   9  -3  -1   39.20    3.70
   9  -3  -1   41.40    3.20
   8  -3  -1   65.49    3.90
   8  -3  -1   67.79    4.40
   7  -3  -1  106.99    5.60
   7  -3  -1  106.49    5.10
   6  -3  -1   87.69    4.50
   6  -3  -1   92.79    4.80
   6  -3  -1   89.79    4.30
   5  -3  -1   15.60    1.60
   5  -3  -1   16.10    1.50
   5  -3  -1   15.30    1.70
   4  -3  -1  106.49    4.60
   4  -3  -1  102.69    4.70
   4  -3  -1  104.79    4.30
   4  -3  -1  100.99    3.40
   3  -3  -1  212.88    7.20
   3  -3  -1  205.98    7.30
   3  -3  -1  213.68    7.40
   3  -3  -1  199.68    6.70
  -3   3   1  227.08    7.30
   2  -3  -1  211.98    7.00
   2  -3  -1  212.48    7.00
   2  -3  -1  209.58    6.90
  -2   3   1  218.88    6.90
  -2   3   1  197.88    7.00
  -2   3   1  215.48    7.00
   1  -3  -1  310.17    9.30
   1  -3  -1  292.27    9.10
   1  -3  -1  293.77    9.50
  -1   3   1  290.77    9.20
  -1   3   1  279.67    9.10
  -1   3   1  296.87    9.40
   0  -3  -1  215.98    6.70
   0  -3  -1  207.08    7.10
   0  -3  -1  216.78    7.60
   0  -3  -1  214.58    7.00
   0   3   1  228.08    6.80
   0   3   1  233.98    7.50
  -1  -3  -1  899.01   26.80
  -1  -3  -1  941.51   27.50
   1   3   1  904.41   26.70
   1   3   1  860.41   27.20
  -2  -3  -1  177.18    6.80
  -3  -3  -1  529.75   17.20
   3   3   1  525.55   16.70
  -4  -3  -1  356.86   12.30
   4   3   1  346.37   12.00
  -5  -3  -1  233.88    8.90
   5   3   1  227.88    8.80
  -6  -3  -1    5.40    0.80
  -6  -3  -1    6.30    1.50
   6   3   1    5.80    2.10
  -7  -3  -1  161.68    5.70
  -7  -3  -1  184.28    7.50
   7   3   1  165.28    7.60
  -8  -3  -1   63.89    4.00
   8   3   1   64.39    4.50
  -9  -3  -1   12.50    2.00
  10  -4  -1   22.70    3.40
  10  -4  -1   23.40    2.60
   9  -4  -1   58.99    3.90
   9  -4  -1   58.69    4.40
   8  -4  -1   40.30    3.50
   8  -4  -1   39.00    3.00
   7  -4  -1   31.10    4.90
   7  -4  -1   29.90    2.80
   6  -4  -1  147.19    6.30
   6  -4  -1  156.68    6.40
   6  -4  -1  150.68    6.70
   5  -4  -1    7.00    1.30
   5  -4  -1    6.50    1.20
   5  -4  -1    8.20    1.60
   4  -4  -1  275.77    9.40
   4  -4  -1  272.87    9.70
   4  -4  -1  277.17    8.70
   4  -4  -1  265.87    9.40
   3  -4  -1  232.28    7.70
   3  -4  -1  237.38    8.10
   3  -4  -1  238.18    8.00
   3  -4  -1  236.18    8.10
  -3   4   1  221.08    7.90
   2  -4  -1  260.77    8.00
   2  -4  -1  244.28    8.10
  -2   4   1  237.48    7.90
  -2   4   1  224.38    7.90
  -2   4   1  225.28    8.10
   1  -4  -1    9.70    1.00
   1  -4  -1    9.00    0.80
   1  -4  -1    9.30    0.90
  -1   4   1    7.60    1.10
   0  -4  -1   77.59    3.20
   0  -4  -1   85.79    3.00
   0  -4  -1   84.19    3.80
   0  -4  -1   82.79    3.40
   0   4   1   87.79    3.00
  -1  -4  -1 1198.08   36.30
  -2  -4  -1  368.46   12.60
   2   4   1  358.36   11.80
  -3  -4  -1   77.79    4.20
   3   4   1   89.69    3.90
  -4  -4  -1  102.09    5.20
   4   4   1  104.79    4.70
  -5  -4  -1  120.89    6.00
   5   4   1  129.19    5.80
  -6  -4  -1   72.89    4.50
   6   4   1   75.59    4.30
   7   4   1    3.20    1.20
  -8  -4  -1   22.60    2.90
   8   4   1   23.00    3.20
  -9  -4  -1   23.90    2.80
   9   4   1   24.30    3.50
  10  -5  -1  132.29    9.10
  10  -5  -1  135.89    6.80
   9  -5  -1   53.79    3.80
   9  -5  -1   43.60    3.90
   8  -5  -1   39.20    3.10
   8  -5  -1   37.90    3.40
   7  -5  -1  242.88    9.60
   7  -5  -1  244.88    9.50
   7  -5  -1  242.88   10.00
   6  -5  -1  228.18    8.60
   6  -5  -1  228.08    9.10
   6  -5  -1  212.28    8.60
   5  -5  -1  121.29    5.20
   5  -5  -1  119.69    5.30
   5  -5  -1  124.99    4.40
   5  -5  -1  118.89    5.60
   4  -5  -1  295.27    9.60
   4  -5  -1  297.07   10.40
   4  -5  -1  293.17    9.90
   4  -5  -1  280.07   10.10
   3  -5  -1  739.23   22.30
   3  -5  -1  752.92   22.60
   3  -5  -1  734.33   22.40
   3  -5  -1  717.33   22.50
  -3   5   1  706.53   22.20
   2  -5  -1  325.67   10.50
   2  -5  -1  317.27   10.80
   2  -5  -1  341.87   10.50
  -2   5   1  301.47   10.30
   1  -5  -1   21.20    1.30
   1  -5  -1   24.70    1.50
   1  -5  -1   21.80    1.80
  -1   5   1   21.20    1.40
  -1   5   1   21.00    1.40
   0  -5  -1  683.53   20.00
   0  -5  -1  696.63   21.40
   0  -5  -1  633.74   20.40
   0   5   1  669.93   20.00
  -1  -5  -1  177.68    6.60
  -1  -5  -1  181.28    7.20
   1   5   1  176.38    5.50
  -2  -5  -1   18.50    1.90
   2   5   1   13.80    1.30
  -3  -5  -1  171.88    7.50
   3   5   1  174.38    6.70
  -4  -5  -1  403.16   14.20
   4   5   1  369.76   13.20
  -5  -5  -1    4.90    1.60
  -6  -5  -1    5.50    1.70
   6   5   1    4.90    1.30
  -7  -5  -1   76.89    5.20
   7   5   1   82.69    4.90
  -8  -5  -1   81.29    5.20
   8   5   1   77.69    5.10
  10  -6  -1   58.19    4.40
  10  -6  -1   65.69    5.50
   9  -6  -1   28.40    2.80
   9  -6  -1   27.00    3.10
   8  -6  -1  192.98    8.90
   8  -6  -1  194.18    8.50
   7  -6  -1  302.47   11.30
   7  -6  -1  311.17   12.10
   7  -6  -1  305.57   11.60
   6  -6  -1  209.08    8.10
   6  -6  -1  200.38    6.80
   6  -6  -1  208.58    8.40
   6  -6  -1  209.98    8.70
   5  -6  -1  112.19    5.50
   5  -6  -1  113.39    5.00
   5  -6  -1  119.39    5.30
   5  -6  -1  118.39    4.60
   4  -6  -1  736.43   22.40
   4  -6  -1  715.63   22.70
   4  -6  -1  731.23   22.40
   4  -6  -1  703.43   22.90
   3  -6  -1  816.92   24.80
   3  -6  -1  778.42   24.60
   2  -6  -1   80.59    3.60
   2  -6  -1   81.09    3.60
   2  -6  -1   80.09    4.00
   1  -6  -1  663.43   22.20
   1  -6  -1  732.53   21.20
   0  -6  -1  721.13   22.20
   0  -6  -1  611.44   22.80
   0  -6  -1  764.72   21.60
   0   6   1  781.72   22.00
  -1  -6  -1  129.79    5.90
  -1  -6  -1  117.39    5.00
   1   6   1  116.79    4.00
  -2  -6  -1  706.33   23.40
  -3  -6  -1  373.46   13.50
   3   6   1  338.97   12.10
  -4  -6  -1  471.35   17.00
   4   6   1  472.95   15.90
  -5  -6  -1   60.69    4.50
   5   6   1   62.79    3.80
  -6  -6  -1  107.19    6.20
   6   6   1  100.29    5.50
  -7  -6  -1  223.88   10.30
   7   6   1  235.78    9.90
  -8  -6  -1   74.49    5.20
   8   6   1   68.29    4.90
  10  -7  -1   14.70    2.50
  10  -7  -1   13.50    2.30
   9  -7  -1   68.59    4.60
   9  -7  -1   68.19    5.00
   8  -7  -1  165.18    8.00
   8  -7  -1  141.19    7.10
   7  -7  -1   75.99    4.50
   7  -7  -1   79.99    5.00
   7  -7  -1   78.29    4.40
   6  -7  -1   28.30    2.30
   6  -7  -1   30.00    2.90
   6  -7  -1   34.50    2.80
   6  -7  -1   29.80    2.40
   5  -7  -1  336.27   12.10
   5  -7  -1  334.87   11.50
   5  -7  -1  334.97   12.40
   5  -7  -1  355.66   11.90
   4  -7  -1  548.15   17.90
   4  -7  -1  532.65   17.40
   4  -7  -1  535.15   17.70
   4  -7  -1  556.34   17.70
   3  -7  -1   67.59    3.40
   3  -7  -1   73.29    3.60
   3  -7  -1   77.69    3.90
   2  -7  -1  485.35   15.90
   2  -7  -1  504.35   16.70
   2  -7  -1  504.25   15.90
   1  -7  -1  344.87   11.00
   1  -7  -1  342.57   12.30
   1  -7  -1  324.47   11.20
   0  -7  -1  465.85   15.40
   0  -7  -1  492.85   16.70
   0  -7  -1  483.05   14.70
   0   7   1  468.75   14.80
  -1  -7  -1  215.78    8.10
  -1  -7  -1  220.38    9.10
   1   7   1  210.38    6.80
  -2  -7  -1  405.96   13.90
  -2  -7  -1  402.86   15.00
  -3  -7  -1  850.21   28.30
  -4  -7  -1  161.58    7.90
   4   7   1  153.58    6.80
  -5  -7  -1  190.48    9.20
   5   7   1  194.08    8.20
  -6  -7  -1  335.97   14.10
   6   7   1  353.86   13.20
  -7  -7  -1   92.99    6.10
   7   7   1   92.09    5.50
   9  -8  -1   57.59    4.70
   8  -8  -1   78.39    5.00
   8  -8  -1   82.89    4.70
   8  -8  -1   77.39    5.40
   7  -8  -1    2.90    1.20
   7  -8  -1    1.00    0.90
   7  -8  -1    0.40    1.20
   7  -8  -1   -0.20    0.90
   6  -8  -1  110.19    5.10
   6  -8  -1  108.99    5.50
   6  -8  -1  108.19    4.80
   6  -8  -1   99.09    5.70
   5  -8  -1   71.29    3.70
   5  -8  -1   71.79    3.80
   5  -8  -1   65.69    3.90
   4  -8  -1   62.89    3.70
   4  -8  -1   65.29    3.70
   4  -8  -1   58.19    3.50
   4  -8  -1   56.09    3.20
   3  -8  -1  173.98    7.30
   3  -8  -1  167.18    6.60
   3  -8  -1  166.68    6.70
   2  -8  -1  202.28    7.80
   2  -8  -1  219.48    7.80
   2  -8  -1  217.88    8.80
   1  -8  -1  369.76   13.60
   1  -8  -1  354.26   12.30
   1  -8  -1  381.76   12.00
   0  -8  -1   68.19    3.60
   0  -8  -1   72.89    3.10
   0  -8  -1   74.09    4.50
  -1  -8  -1  262.87    9.90
   1   8   1  285.77    8.70
  -2  -8  -1  315.07   12.70
  -2  -8  -1  311.47   11.40
  -3  -8  -1  134.39    7.20
  -4  -8  -1   53.89    4.40
  -5  -8  -1  147.89    8.20
   5   8   1  156.18    7.20
  -6  -8  -1  118.69    7.40
   6   8   1  129.59    6.60
   9  -9  -1    6.10    1.80
   9  -9  -1    4.90    1.90
   8  -9  -1    7.60    1.90
   8  -9  -1    7.60    1.60
   8  -9  -1    6.90    2.00
   7  -9  -1   27.60    2.80
   7  -9  -1   24.80    3.50
   7  -9  -1   24.70    2.50
   7  -9  -1   23.40    2.20
   6  -9  -1   38.90    2.90
   6  -9  -1   45.10    3.00
   6  -9  -1   45.40    3.30
   6  -9  -1   42.70    3.60
   5  -9  -1   42.30    3.10
   5  -9  -1   42.80    3.50
   5  -9  -1   44.60    2.80
   5  -9  -1   40.30    3.10
   4  -9  -1   37.50    2.90
   4  -9  -1   37.40    3.00
   4  -9  -1   38.70    2.50
   4  -9  -1   34.50    2.90
   3  -9  -1  112.09    5.60
   3  -9  -1  100.99    4.90
   3  -9  -1  104.89    4.80
   2  -9  -1   45.20    2.70
   2  -9  -1   43.20    2.80
   2  -9  -1   46.40    3.50
   1  -9  -1   32.80    2.10
   1  -9  -1   31.70    2.40
   0  -9  -1  125.49    4.70
   0  -9  -1  128.19    6.80
   0  -9  -1  120.39    5.50
  -1  -9  -1  150.28    7.70
  -1  -9  -1  157.08    6.60
   1   9   1  147.69    5.10
  -2  -9  -1  112.19    6.60
  -2  -9  -1  109.09    5.50
  -3  -9  -1   39.60    3.20
  -3  -9  -1   33.70    3.60
  -4  -9  -1   51.29    3.90
  -4  -9  -1   49.80    4.50
  -5  -9  -1   47.20    4.70
  -6  -9  -1   27.70    5.00
   8 -10  -1   23.70    3.70
   8 -10  -1   28.00    2.80
   8 -10  -1   18.70    2.90
   7 -10  -1   13.90    2.60
   7 -10  -1    8.50    1.80
   7 -10  -1    9.90    1.90
   7 -10  -1    8.00    1.80
   6 -10  -1   54.79    4.30
   6 -10  -1   55.39    3.70
   6 -10  -1   55.09    3.90
   6 -10  -1   56.19    3.50
   5 -10  -1  148.19    7.10
   5 -10  -1  147.59    6.90
   5 -10  -1  160.68    6.50
   5 -10  -1  159.18    7.50
   4 -10  -1   13.10    2.10
   4 -10  -1   12.90    1.70
   4 -10  -1   13.90    2.40
   3 -10  -1   33.60    3.10
   3 -10  -1   33.80    2.50
   3 -10  -1   35.60    2.70
   2 -10  -1  130.49    6.70
   2 -10  -1  126.99    5.60
   2 -10  -1  121.29    5.40
   1 -10  -1  194.98    9.10
   1 -10  -1  188.38    7.10
   1 -10  -1  199.38    7.70
   0 -10  -1    7.20    1.10
   0 -10  -1    4.80    1.70
   0 -10  -1    7.00    1.50
  -1 -10  -1   58.09    4.60
  -1 -10  -1   59.69    3.70
  -2 -10  -1  106.09    5.50
  -2 -10  -1  101.29    6.50
  -3 -10  -1   19.30    2.80
  -3 -10  -1   16.60    3.00
  -4 -10  -1   25.50    3.10
  -4 -10  -1   26.20    3.80
  -5 -10  -1   23.70    3.90
  -5 -10  -1   20.60    3.20
   7 -11  -1   12.10    2.10
   7 -11  -1   14.40    2.20
   7 -11  -1   11.70    2.80
   6 -11  -1  217.98   10.00
   6 -11  -1  216.38    8.50
   6 -11  -1  217.18    9.40
   5 -11  -1   66.59    3.80
   5 -11  -1   66.59    4.80
   5 -11  -1   64.39    4.60
   5 -11  -1   72.69    4.40
   4 -11  -1   10.30    2.20
   4 -11  -1   11.40    1.90
   4 -11  -1   12.10    1.90
   3 -11  -1  384.56   14.60
   3 -11  -1  357.26   13.00
   3 -11  -1  372.36   12.90
   2 -11  -1  134.19    6.10
   2 -11  -1  141.09    6.00
   2 -11  -1  149.39    7.70
   1 -11  -1   15.10    1.70
   1 -11  -1   12.10    2.60
   1 -11  -1   18.10    2.10
   0 -11  -1   98.29    6.30
   0 -11  -1   97.59    5.00
  -1 -11  -1  274.87   11.40
  -1 -11  -1  286.47   12.70
  -2 -11  -1   62.79    5.20
  -2 -11  -1   59.79    4.10
  -3 -11  -1    0.80    1.40
  -4 -11  -1  145.49    8.90
  -4 -11  -1  147.99    7.60
   6 -12  -1  150.18    7.40
   6 -12  -1  135.79    7.90
   6 -12  -1  158.18    7.50
   6 -12  -1  160.38    6.70
   5 -12  -1    5.50    2.20
   5 -12  -1    6.70    2.00
   5 -12  -1    8.80    1.90
   5 -12  -1    4.30    1.30
   4 -12  -1   57.09    4.50
   4 -12  -1   55.59    3.50
   4 -12  -1   58.79    3.90
   3 -12  -1  277.47   10.30
   3 -12  -1  270.67   10.30
   3 -12  -1  273.07   12.00
   2 -12  -1  145.89    6.30
   2 -12  -1  149.19    8.10
   2 -12  -1  146.99    6.50
   1 -12  -1   98.59    5.10
   1 -12  -1   96.49    4.40
   1 -12  -1  101.59    6.50
   0 -12  -1  258.27   10.20
   0 -12  -1  262.27   12.10
  -1 -12  -1  163.28    7.60
  -1 -12  -1  170.88   10.50
  -2 -12  -1    5.10    1.60
  -2 -12  -1    5.50    2.00
   5 -13  -1   50.59    4.40
   5 -13  -1   56.29    4.80
   5 -13  -1   46.40    3.50
   5 -13  -1   57.19    4.00
   4 -13  -1   67.89    5.10
   4 -13  -1   64.69    3.90
   4 -13  -1   61.59    4.10
   3 -13  -1   60.49    4.80
   3 -13  -1   53.09    3.60
   3 -13  -1   50.09    3.50
   2 -13  -1   20.10    2.20
   2 -13  -1   18.80    2.70
   2 -13  -1   15.10    2.90
   1 -13  -1  188.18    8.20
   1 -13  -1  197.18   12.30
   0 -13  -1  126.49    6.40
   0 -13  -1  133.89    8.10
  -1 -14   2   21.00    3.60
   0 -14   2  112.49    5.20
   0 -14   2   98.79    6.90
   0 -14   2  107.49    4.80
   1 -14   2  146.09    5.80
   1 -14   2  145.79    6.20
   2 -14   2   69.09    4.10
   2 -14   2   66.89    5.30
   3 -14   2   27.20    2.70
   3 -14   2   22.50    3.40
   4 -14   2  140.29    6.90
   4 -14   2  139.99    7.70
   4 -14   2  138.89    7.80
  -3 -13   2   37.40    4.50
  -3 -13   2   36.90    3.40
  -2 -13   2    1.60    1.70
  -2 -13   2    2.60    1.40
  -1 -13   2   36.60    2.90
  -1 -13   2   33.30    2.20
  -1 -13   2   27.30    4.10
   0 -13   2  130.19    5.40
   0 -13   2  136.29    5.70
   0 -13   2  128.29    7.70
   1 -13   2   37.10    2.50
   1 -13   2   39.90    3.90
   2 -13   2    0.10    0.90
   2 -13   2   -1.10    1.10
   3 -13   2   74.29    5.20
   3 -13   2   76.39    4.50
   4 -13   2   55.19    3.90
   4 -13   2   49.30    4.30
   5 -13   2   14.00    2.40
   5 -13   2   15.10    2.90
   5 -13   2   11.00    2.40
   6 -13   2    7.30    2.40
   6 -13   2    5.00    1.70
   6 -13   2    4.30    1.70
  -4 -12   2   12.20    2.90
  -4 -12   2   11.80    2.30
  -3 -12   2   31.90    3.10
  -3 -12   2   29.00    4.30
  -2 -12   2   11.70    1.90
  -2 -12   2    6.90    2.10
  -1 -12   2    7.20    1.40
  -1 -12   2    4.30    1.70
  -1 -12   2    5.40    1.00
   0 -12   2   68.09    3.30
   0 -12   2   61.49    4.80
   0 -12   2   67.09    3.50
   1 -12   2   74.79    3.90
   1 -12   2   76.39    5.30
   1 -12   2   76.29    3.50
   2 -12   2   30.60    2.60
   2 -12   2   31.50    2.30
   2 -12   2   33.20    3.40
   3 -12   2   19.10    2.20
   3 -12   2   19.80    2.90
   4 -12   2   11.40    1.90
   4 -12   2   11.90    2.30
   5 -12   2    9.30    2.30
   5 -12   2   10.00    2.50
   5 -12   2   14.50    2.60
   6 -12   2   13.00    2.40
   6 -12   2   16.50    2.60
   6 -12   2   12.60    2.70
   7 -12   2   18.90    3.30
   7 -12   2   19.20    2.80
   7 -12   2   16.30    2.80
  -5 -11   2    0.50    1.80
  -4 -11   2  130.09    7.90
  -3 -11   2  112.79    7.00
  -3 -11   2  115.29    5.70
  -2 -11   2   53.19    4.50
  -2 -11   2   55.49    3.40
  -1 -11   2  147.89    6.20
  -1 -11   2  152.88    5.50
  -1 -11   2  147.99    7.90
   0 -11   2  217.98    8.00
   0 -11   2  227.58   10.10
   0 -11   2  217.48    7.80
   1 -11   2   93.29    4.40
   1 -11   2   92.39    4.10
   1 -11   2  106.89    5.90
   2 -11   2   13.90    2.40
   2 -11   2   12.70    1.30
   2 -11   2   13.20    2.00
   3 -11   2  222.68    9.40
   3 -11   2  209.38    8.50
   4 -11   2  158.08    7.50
   4 -11   2  151.28    7.20
   4 -11   2  153.68    6.90
   5 -11   2   52.09    4.30
   5 -11   2   54.79    3.80
   6 -11   2   22.10    2.40
   6 -11   2   20.70    3.20
   6 -11   2   22.70    3.10
   7 -11   2   63.69    4.50
   7 -11   2   65.99    5.10
   7 -11   2   61.89    4.00
   8 -11   2   23.70    3.80
   8 -11   2   26.20    3.00
  -6 -10   2   39.20    4.10
  -5 -10   2  123.09    7.50
  -4 -10   2  326.27   13.90
  -3 -10   2  155.08    8.10
  -2 -10   2  200.78    7.70
  -2 -10   2  187.98    9.20
  -1 -10   2  575.84   17.70
  -1 -10   2  575.14   18.40
  -1 -10   2  580.34   20.50
   0 -10   2  162.98    6.20
   0 -10   2  166.98    6.20
   0 -10   2  166.18    7.90
   1 -10   2   62.99    6.10
   1 -10   2   56.19    2.80
   1 -10   2   60.09    3.20
   2 -10   2  493.25   17.30
   2 -10   2  508.35   16.40
   2 -10   2  479.75   15.20
   3 -10   2  506.45   16.90
   3 -10   2  499.65   17.40
   4 -10   2  115.79    5.90
   4 -10   2  112.79    5.50
   4 -10   2  113.49    5.60
   5 -10   2   21.10    2.30
   5 -10   2   22.10    2.30
   5 -10   2   21.90    2.90
   6 -10   2  104.29    6.10
   6 -10   2   98.39    5.00
   6 -10   2  102.19    5.50
   7 -10   2  120.39    5.40
   7 -10   2  109.99    6.70
   7 -10   2  119.29    6.30
   8 -10   2   23.00    3.60
   7   9  -2   41.40    3.60
  -7  -9   2   39.90    4.20
   6   9  -2   79.89    5.00
  -6  -9   2   85.39    5.90
  -5  -9   2  415.56   16.50
  -4  -9   2  152.48    7.90
  -3  -9   2   63.49    4.50
  -2  -9   2  538.35   16.40
  -2  -9   2  555.54   19.40
  -1  -9   2  478.05   14.80
  -1  -9   2  477.65   17.10
  -1  -9   2  481.15   15.40
   0  -9   2   19.80    2.30
   0  -9   2   20.40    1.60
   1  -9   2  446.76   14.20
   1  -9   2  420.26   13.50
   1  -9   2  436.86   15.30
   2  -9   2  637.04   20.60
   2  -9   2  662.13   21.50
   2  -9   2  645.44   19.50
   3  -9   2  295.87   10.80
   3  -9   2  307.37   11.30
  -4   9  -2    6.50    0.90
   4  -9   2    7.60    1.60
   4  -9   2    8.40    1.10
   5  -9   2  254.57    9.60
   5  -9   2  253.47   10.00
   5  -9   2  260.97   10.40
   6  -9   2  352.76   12.10
   6  -9   2  341.37   13.50
   6  -9   2  349.27   13.00
   7  -9   2  111.09    6.40
   7  -9   2  110.69    4.80
   7  -9   2  110.49    5.90
   8  -9   2   39.00    3.40
   8  -9   2   33.20    3.60
   9  -9   2  147.19    8.20
   9  -9   2  147.09    7.50
   7   8  -2   40.60    3.40
  -7  -8   2   37.90    3.90
   6   8  -2  157.18    7.60
  -6  -8   2  179.78    8.70
   5   8  -2   93.89    5.00
  -5  -8   2   89.39    5.70
   4   8  -2   14.10    2.00
  -4  -8   2   11.70    2.30
  -3  -8   2  187.18    8.50
  -2  -8   2  279.77   10.80
  -2  -8   2  262.37    8.40
   1   8  -2  345.17   11.00
  -1  -8   2  338.67   12.70
  -1  -8   2  356.36   11.00
  -1  -8   2  344.37   11.40
   0  -8   2   23.80    1.70
   0  -8   2   21.10    2.20
   0  -8   2   22.90    1.50
   1  -8   2  524.95   17.70
   1  -8   2  546.25   16.90
   1  -8   2  519.25   16.10
   2  -8   2  821.92   26.10
   2  -8   2  848.42   24.50
   2  -8   2  811.82   25.60
  -3   8  -2   64.49    2.70
   3  -8   2   72.99    3.80
   3  -8   2   73.79    2.90
   3  -8   2   74.99    3.80
  -4   8  -2  136.99    5.20
   4  -8   2  144.29    5.20
   4  -8   2  146.09    6.50
   4  -8   2  156.38    6.20
   4  -8   2  154.78    6.40
   5  -8   2  563.34   18.50
   5  -8   2  536.35   17.70
   6  -8   2  132.39    5.40
   6  -8   2  122.79    6.50
   6  -8   2  129.79    6.20
   7  -8   2  140.19    6.60
   7  -8   2  133.19    5.20
   7  -8   2  127.69    7.00
   8  -8   2  135.59    6.90
   8  -8   2  150.38    7.80
   9  -8   2   83.39    7.50
  -8  -7   2   25.60    3.50
   7   7  -2   27.70    2.90
  -7  -7   2   23.60    3.50
   6   7  -2   51.19    3.50
  -6  -7   2   41.30    3.70
   5   7  -2   31.10    2.60
  -5  -7   2   34.50    4.10
   4   7  -2  216.88    8.40
  -4  -7   2  210.88    9.10
   3   7  -2  194.18    7.60
  -3  -7   2  203.98    8.50
  -2  -7   2  240.28    9.50
  -2  -7   2  241.08    7.60
   1   7  -2   33.10    1.70
  -1  -7   2   31.40    2.50
  -1  -7   2   35.80    1.80
   0  -7   2  154.58    5.70
   0  -7   2  163.88    6.70
   0  -7   2  159.98    5.50
   1  -7   2  399.86   12.90
   1  -7   2  399.06   13.50
   1  -7   2  397.76   12.10
   2  -7   2   38.80    2.40
   2  -7   2   40.80    2.50
   2  -7   2   40.30    1.70
  -3   7  -2  416.36   13.10
   3  -7   2  433.06   14.30
   3  -7   2  436.96   13.10
   3  -7   2  434.76   14.20
  -4   7  -2  256.17    8.70
   4  -7   2  263.47    8.70
   4  -7   2  271.47    9.30
   4  -7   2  272.87   10.00
   4  -7   2  268.87    9.80
   5  -7   2  251.97    9.70
   5  -7   2  252.57    8.90
   5  -7   2  261.87   10.10
   6  -7   2   66.09    4.00
   6  -7   2   72.79    4.50
   6  -7   2   68.59    3.20
   7  -7   2  105.09    6.00
   7  -7   2  101.89    4.30
   7  -7   2  107.29    4.60
   7  -7   2  115.29    5.70
   8  -7   2   90.39    5.70
   8  -7   2   81.69    4.90
   9  -7   2    3.00    1.40
   9  -7   2    3.80    1.80
   9   6  -2   70.29    4.90
  -9  -6   2   76.29    5.00
   8   6  -2   37.90    3.40
  -8  -6   2   36.00    3.50
   7   6  -2   32.60    3.00
  -7  -6   2   33.90    3.30
   6   6  -2  213.58    8.90
  -6  -6   2  230.18    9.50
   5   6  -2  165.18    7.20
  -5  -6   2  165.08    7.50
   4   6  -2   50.69    3.10
  -4  -6   2   55.39    3.60
   3   6  -2   86.59    4.20
  -3  -6   2  107.99    5.00
  -2  -6   2  458.25   13.80
  -2  -6   2  457.25   15.40
   1   6  -2  421.96   12.50
  -1  -6   2  402.36   12.50
  -1  -6   2  394.86   13.70
   0   6  -2   71.59    3.00
   0  -6   2   71.09    3.50
   0  -6   2   68.09    2.70
   0  -6   2   74.99    3.10
   1  -6   2  261.87    9.20
   1  -6   2  288.17    8.60
   1  -6   2  285.27    9.70
  -2   6  -2  602.04   17.90
   2  -6   2  608.64   19.00
   2  -6   2  615.04   19.00
  -3   6  -2  132.79    4.70
   3  -6   2  136.89    4.70
   3  -6   2  134.39    5.50
   3  -6   2  141.19    5.70
  -4   6  -2   56.49    2.70
   4  -6   2   59.59    3.40
   4  -6   2   58.19    3.30
   5  -6   2  130.59    5.60
   5  -6   2  157.18    6.40
   5  -6   2  163.08    6.80
   6  -6   2   98.09    4.00
   6  -6   2  107.69    5.60
   7  -6   2   23.10    2.70
   7  -6   2   16.70    2.30
   7  -6   2   14.50    2.20
   7  -6   2   17.60    1.30
   8  -6   2   34.70    3.40
   8  -6   2   34.70    2.90
   9  -6   2   20.90    3.30
   9  -6   2   23.50    2.50
  10  -6   2   27.60    3.80
  10  -6   2   24.90    3.60
   9   5  -2   92.59    6.40
  -9  -5   2   88.19    5.10
   8   5  -2   10.60    2.00
  -8  -5   2    8.20    1.80
   7   5  -2  311.87   11.90
  -7  -5   2  306.47   11.70
  -6  -5   2  257.37    8.30
  -6  -5   2  269.87   10.30
   5   5  -2   88.09    4.40
  -5  -5   2   81.99    3.00
  -5  -5   2   83.79    4.60
   4   5  -2  197.98    7.40
  -4  -5   2  185.18    6.00
  -4  -5   2  192.08    6.10
  -4  -5   2  191.18    7.70
   3   5  -2  999.90   30.50
  -3  -5   2 1003.60   29.40
  -3  -5   2 1020.40   31.10
   2   5  -2  532.05   16.60
  -2  -5   2  536.35   17.20
  -2  -5   2  525.15   15.80
   1   5  -2  292.97    9.10
  -1  -5   2  286.17   10.00
  -1  -5   2  297.57    9.20
   0  -5   2  402.66   12.80
   0  -5   2  424.96   13.40
  -1   5  -2 1231.08   35.70
   1  -5   2 1178.08   35.70
  -2   5  -2   40.60    1.60
   2  -5   2   43.60    1.70
   2  -5   2   43.40    2.30
  -3   5  -2  133.99    4.70
   3  -5   2  130.99    5.30
   3  -5   2  140.39    5.50
  -4   5  -2 1324.77   40.20
   4  -5   2 1348.97   40.00
   4  -5   2 1376.36   41.30
   4  -5   2 1398.06   40.90
   5  -5   2  137.39    4.90
   5  -5   2  136.59    6.20
   5  -5   2  133.89    5.80
   6  -5   2   37.70    2.70
   6  -5   2   37.50    3.00
   6  -5   2   35.00    2.00
   7  -5   2   93.29    4.80
   7  -5   2   94.19    3.90
   7  -5   2  100.19    5.60
   8  -5   2  135.79    6.40
   8  -5   2  136.99    7.10
   9  -5   2   38.80    3.10
   9  -5   2   35.60    3.50
  10  -5   2   14.50    2.70
  10  -5   2   24.10    2.60
   9   4  -2   11.30    2.40
  -9  -4   2   13.10    2.00
   8   4  -2  215.68    9.40
  -8  -4   2  223.98    8.80
   7   4  -2  561.14   19.20
  -7  -4   2  558.94   18.60
   6   4  -2  259.07   10.00
  -6  -4   2  253.47    8.50
  -6  -4   2  271.37    9.80
   5   4  -2  190.68    7.40
  -5  -4   2  179.08    7.30
  -4  -4   2  783.02   23.10
  -4  -4   2  783.32   24.50
   3   4  -2  435.06   14.70
  -3  -4   2  475.85   15.10
  -3  -4   2  476.85   13.80
   2   4  -2  902.01   26.70
  -2  -4   2  877.41   27.20
  -2  -4   2  860.71   25.60
  -2  -4   2  853.41   26.20
  -1  -4   2 1293.67   37.70
  -1  -4   2 1241.68   37.00
  -1  -4   2 1274.37   37.30
   0   4  -2 4085.19  172.48
   0  -4   2 4329.37  178.18
  -1   4  -2  518.15   16.10
   1  -4   2  538.95   16.20
  -2   4  -2  188.78    7.00
  -2   4  -2  182.68    5.80
   2  -4   2  188.08    7.30
  -3   4  -2 1714.03   51.29
   3  -4   2 1827.92   51.99
   3  -4   2 1747.93   52.09
  -4   4  -2  464.85   15.20
   4  -4   2  495.45   15.70
   4  -4   2  501.15   16.10
   5  -4   2  136.99    6.00
   5  -4   2  123.99    5.40
   6  -4   2  287.77   10.20
   6  -4   2  270.77   10.70
   7  -4   2  202.58    7.30
   7  -4   2  196.48    8.80
   8  -4   2  133.19    7.10
   8  -4   2  143.09    6.40
   9  -4   2   24.00    2.40
   9  -4   2   24.70    3.40
  10  -4   2   81.59    4.90
  10  -4   2   93.19    6.00
  10   3  -2    4.20    1.50
   9   3  -2   25.10    3.40
  -9  -3   2   19.10    1.90
   8   3  -2  207.98    9.10
  -8  -3   2  212.88    8.00
   7   3  -2  213.18    9.10
  -7  -3   2  238.48    8.50
   6   3  -2  116.89    5.40
  -6  -3   2  117.79    5.10
   5   3  -2  539.55   17.30
  -5  -3   2  515.15   16.20
  -5  -3   2  541.25   17.10
   4   3  -2 1245.98   37.40
  -4  -3   2 1245.28   36.50
   3   3  -2  371.76   11.70
  -3  -3   2  351.76   10.90
  -3  -3   2  360.76   11.70
   2   3  -2 1015.10   30.40
  -2  -3   2 1041.30   30.50
  -2  -3   2 1035.70   30.60
  -2  -3   2 1015.90   30.40
   1   3  -2 2833.62  109.49
  -1  -3   2 2790.42  110.09
   0   3  -2  527.45   16.00
   0  -3   2  544.05   16.00
  -1   3  -2  204.28    6.70
   1  -3   2  204.88    6.70
  -2   3  -2 1527.15   44.60
  -2   3  -2 1562.94   44.10
   2  -3   2 1469.15   44.60
   2  -3   2 1515.15   44.60
   3  -3   2  941.81   28.70
   3  -3   2 1014.20   29.70
   3  -3   2  915.51   28.10
   4  -3   2  539.55   17.10
   4  -3   2  541.95   17.60
   4  -3   2  553.54   16.60
   5  -3   2  150.58    6.40
   5  -3   2  143.29    5.80
   6  -3   2  396.56   13.10
   6  -3   2  371.66   12.30
   6  -3   2  394.16   14.00
   7  -3   2  432.46   14.20
   7  -3   2  418.26   15.00
   7  -3   2  385.46   12.90
   8  -3   2   49.30    3.90
   8  -3   2   50.99    3.30
   9  -3   2  156.18    7.10
   9  -3   2  172.88    8.30
  10  -3   2  139.59    6.70
  10  -3   2  147.09    8.00
  10   2  -2    3.60    1.50
   9   2  -2   20.60    3.10
   8   2  -2  116.79    6.20
  -8  -2   2  123.19    4.80
   7   2  -2    3.00    1.00
  -7  -2   2    2.00    0.80
   6   2  -2  132.89    6.10
  -6  -2   2  144.39    5.50
   5   2  -2  300.47   10.70
  -5  -2   2  312.87   10.20
   4   2  -2   41.40    2.50
  -4  -2   2   50.99    2.20
  -4  -2   2   56.19    2.50
   3   2  -2   95.49    3.80
  -3  -2   2   99.19    4.30
  -3  -2   2   94.29    3.60
  -3  -2   2   96.39    3.40
   2   2  -2 1372.96   40.00
   2   2  -2 1370.86   40.10
  -2  -2   2 1357.66   40.10
  -2  -2   2 1376.56   39.90
  -2  -2   2 1353.66   40.00
   1   2  -2 1095.99   31.00
   1   2  -2 1125.29   31.00
  -1  -2   2 1025.50   31.00
  -1  -2   2 1007.00   31.00
   0   2  -2  377.76   11.90
   0   2  -2  400.46   11.60
   0  -2   2  420.26   11.60
   0  -2   2  387.86   11.90
  -1   2  -2  207.28    7.20
   1  -2   2  246.18    7.20
   1  -2   2  234.08    7.30
  -2   2  -2  936.31   28.00
   2  -2   2  929.01   27.40
   2  -2   2  930.31   27.80
   2  -2   2  940.21   27.70
  -3   2  -2  386.56   12.30
  -3   2  -2  388.46   12.40
  -3   2  -2  400.06   12.00
   3  -2   2  394.96   12.10
   3  -2   2  383.26   12.30
   3  -2   2  385.96   12.60
  -4   2  -2  303.37    9.50
   4  -2   2  296.37    9.70
   4  -2   2  301.67   10.00
   4  -2   2  304.87   10.50
  -5   2  -2  401.76   12.00
   5  -2   2  380.96   12.50
   5  -2   2  373.76   12.20
   5  -2   2  369.86   13.20
   6  -2   2  510.65   17.50
   6  -2   2  520.75   16.20
   6  -2   2  516.35   16.60
   7  -2   2   18.10    1.80
   7  -2   2   23.10    2.40
   7  -2   2   17.20    1.80
   8  -2   2  118.49    6.40
   8  -2   2  124.59    5.50
   9  -2   2  145.39    7.50
   9  -2   2  134.29    6.30
  10  -2   2   19.70    3.00
  10  -2   2   21.10    2.40
  10   1  -2   17.10    3.20
   9   1  -2   77.19    5.10
   8   1  -2   78.99    4.80
   7   1  -2  105.29    5.30
  -7  -1   2   98.79    3.80
   6   1  -2   28.60    2.30
   6   1  -2   30.50    1.90
  -6  -1   2   25.30    1.60
   5   1  -2  265.87    8.80
   5   1  -2  266.47    9.50
  -5  -1   2  254.17    8.40
   4   1  -2  110.69    4.60
   4   1  -2  110.69    4.50
   4   1  -2  110.59    4.00
  -4  -1   2  102.59    3.80
  -4  -1   2   98.09    3.90
   3   1  -2  150.68    5.30
   3   1  -2  146.39    5.40
  -3  -1   2  142.29    5.20
  -3  -1   2  143.09    4.90
  -3  -1   2  143.59    4.80
   2   1  -2   74.59    3.00
   2   1  -2   69.19    2.80
  -2  -1   2   81.59    2.80
  -2  -1   2   78.49    2.90
  -2  -1   2   80.29    3.00
   1   1  -2  157.68    5.30
   1   1  -2  152.58    5.00
  -1  -1   2  176.38    5.30
  -1  -1   2  172.78    5.10
   0   1  -2   94.69    3.20
   0   1  -2   90.89    3.30
   0  -1   2  107.59    3.20
   0  -1   2  111.09    3.40
  -1   1  -2  359.56   10.80
  -1   1  -2  348.67   10.80
  -1   1  -2  364.16   10.90
   1  -1   2  358.96   10.90
   1  -1   2  363.06   10.90
   1  -1   2  356.46   10.80
  -2   1  -2  401.36   12.10
  -2   1  -2  384.06   12.00
  -2   1  -2  371.06   12.20
   2  -1   2  399.46   12.30
   2  -1   2  409.06   12.10
   2  -1   2  395.46   12.10
  -3   1  -2   63.49    2.70
  -3   1  -2   61.59    2.70
  -3   1  -2   61.29    3.20
   3  -1   2   70.59    2.80
   3  -1   2   64.49    2.80
   3  -1   2   67.79    3.10
  -4   1  -2  755.12   22.80
   4  -1   2  770.52   22.90
   4  -1   2  776.32   23.60
   4  -1   2  730.93   23.00
  -5   1  -2  167.98    5.90
   5  -1   2  166.78    6.80
   5  -1   2  162.28    6.10
   5  -1   2  168.28    6.10
  -6   1  -2   49.60    2.50
   6  -1   2   49.30    2.70
   6  -1   2   46.70    3.20
  -7   1  -2   16.10    1.50
   7  -1   2   17.90    2.50
   7  -1   2   22.80    1.90
  -8   1  -2   75.29    3.40
   8  -1   2   76.19    4.00
   8  -1   2   70.49    4.70
   9  -1   2   40.30    2.80
   9  -1   2   41.70    3.80
  10  -1   2    9.80    1.80
  10  -1   2    7.10    2.00
  10   0  -2   17.90    3.10
   9   0  -2  164.08    8.00
   8   0  -2  186.28    8.20
   8   0  -2  170.38    7.10
   7   0  -2   59.89    3.80
   7   0  -2   62.39    3.30
   6   0  -2  365.86   13.00
   6   0  -2  379.86   12.40
   5   0  -2  406.66   13.70
   5   0  -2  406.86   13.00
   5   0  -2  397.16   13.50
   4   0  -2  302.57    9.90
   4   0  -2  302.57   10.40
   4   0  -2  311.87   10.30
   3   0  -2  344.97   10.50
   3   0  -2  329.37   10.60
   3   0  -2  351.56   10.90
  -3   0   2  325.27   10.80
  -3   0   2  316.67   10.60
  -3   0   2  330.67   10.40
   2   0  -2 1310.37   36.50
   2   0  -2 1329.67   36.60
  -2   0   2 1188.18   36.70
  -2   0   2 1238.88   36.10
  -2   0   2 1230.58   36.50
  -2   0   2 1214.18   36.50
   1   0  -2  256.27    7.60
   1   0  -2  259.37    7.50
   1   0  -2  265.27    7.90
  -1   0   2  243.08    7.50
  -1   0   2  245.48    7.80
  -1   0   2  233.38    7.60
   0   0  -2  275.07    8.30
   0   0  -2  269.27    7.80
   0   0  -2  273.27    8.20
   0   0   2  258.07    8.10
   0   0   2  262.07    8.20
   0   0   2  259.67    7.70
  -1   0  -2  628.94   19.40
  -1   0  -2  636.94   19.20
  -1   0  -2  664.33   19.70
   1   0   2  668.13   19.30
   1   0   2  676.03   19.70
   1   0   2  670.03   19.40
  -2   0  -2  626.44   19.00
  -2   0  -2  661.93   19.50
  -2   0  -2  607.34   19.60
   2   0   2  646.64   19.40
   2   0   2  652.13   19.00
   2   0   2  661.33   19.50
  -3   0  -2  735.63   21.90
  -3   0  -2  715.93   21.50
   3   0   2  733.33   21.50
   3   0   2  706.93   22.00
   3   0   2  707.53   21.90
  -4   0  -2   24.20    1.50
  -4   0  -2   26.20    1.80
   4   0   2   24.80    1.80
   4   0   2   26.40    1.50
   4   0   2   25.00    1.90
  -5   0  -2  245.08    8.40
   5   0   2  232.08    8.00
   5   0   2  235.38    8.90
  -6   0  -2  233.68    7.80
   6   0   2  197.68    8.50
   6   0   2  209.18    7.50
  -7   0  -2   55.19    3.00
   7   0   2   52.19    2.90
   7   0   2   52.09    3.60
  -8   0  -2   43.60    2.70
   8   0   2   42.90    3.60
   8   0   2   47.00    2.80
  -9   0  -2  138.99    5.60
   9   0   2  150.58    7.70
   9   0   2  139.69    6.00
  10  -1  -2  123.59    7.00
   9  -1  -2  208.88    9.40
   9  -1  -2  205.18    8.40
   8  -1  -2  115.19    5.40
   8  -1  -2  116.69    6.10
   7  -1  -2  207.28    8.70
   7  -1  -2  221.08    8.20
   6  -1  -2  565.94   18.50
   6  -1  -2  549.05   17.80
   6  -1  -2  554.24   18.40
   5  -1  -2  596.74   19.40
   5  -1  -2  606.24   19.50
   5  -1  -2  614.04   19.00
   4  -1  -2  189.58    7.00
   4  -1  -2  187.18    7.00
   4  -1  -2  192.18    6.70
   3  -1  -2 1357.66   39.80
   3  -1  -2 1385.96   40.10
   3  -1  -2 1370.76   40.00
  -3   1   2 1349.16   39.80
  -3   1   2 1337.37   40.00
  -3   1   2 1326.07   39.90
  -2   1   2 9043.20  318.47
   1  -1  -2  395.06   12.30
   1  -1  -2  370.46   12.10
  -1   1   2  426.76   12.10
  -1   1   2  412.36   12.20
   0  -1  -2   99.99    3.30
   0  -1  -2   98.29    2.90
   0  -1  -2   98.79    3.50
   0   1   2   76.99    3.30
   0   1   2   77.19    3.20
  -1  -1  -2 3526.75  172.58
   1   1   2 3899.81  179.88
  -2  -1  -2 1495.15   45.20
  -2  -1  -2 1533.95   44.60
  -2  -1  -2 1593.54   45.60
   2   1   2 1537.75   45.60
   2   1   2 1541.05   45.20
   2   1   2 1556.44   44.60
  -3  -1  -2   84.29    3.20
   3   1   2   93.29    3.20
   3   1   2   94.59    4.10
   3   1   2   97.99    3.90
  -4  -1  -2  508.25   15.60
  -4  -1  -2  504.45   16.40
   4   1   2  526.55   15.60
   4   1   2  516.55   16.60
  -5  -1  -2  821.32   24.60
  -5  -1  -2  732.43   23.60
   5   1   2  795.32   23.60
   5   1   2  804.02   24.90
  -6  -1  -2   96.79    4.50
   6   1   2   93.49    3.80
   6   1   2   87.79    4.70
  -7  -1  -2   16.10    1.70
   7   1   2   11.00    1.90
   7   1   2   13.40    1.30
  -8  -1  -2  251.27    9.10
   8   1   2  243.08   10.30
   8   1   2  236.28    8.50
  -9  -1  -2   81.29    4.00
   9   1   2   75.89    5.20
  10  -2  -2  124.39    6.30
  10  -2  -2  138.99    7.50
   9  -2  -2  102.99    5.30
   9  -2  -2  106.39    6.10
   8  -2  -2  111.69    5.40
   8  -2  -2  111.09    6.00
   7  -2  -2  610.54   20.60
   7  -2  -2  617.84   20.00
   6  -2  -2  306.87   11.30
   6  -2  -2  323.27   11.60
   6  -2  -2  315.07   11.00
   5  -2  -2   31.90    2.30
   5  -2  -2   32.70    2.40
   5  -2  -2   33.30    2.20
   4  -2  -2  874.31   27.40
   4  -2  -2  906.11   27.30
   4  -2  -2  919.11   27.50
   3  -2  -2 2166.58   61.19
   3  -2  -2 2123.49   61.29
   3  -2  -2 2137.39   61.29
   3  -2  -2 2081.09   60.39
  -3   2   2 2104.79   60.39
  -3   2   2 2031.10   61.09
  -3   2   2 2023.00   61.29
   2  -2  -2 1619.04   48.60
   2  -2  -2 1763.62   49.00
   2  -2  -2 1681.03   48.80
   2  -2  -2 1710.03   48.70
  -2   2   2 1671.13   48.80
  -2   2   2 1588.84   48.50
   1  -2  -2  479.65   13.80
   1  -2  -2  461.95   13.70
   1  -2  -2  470.85   13.50
  -1   2   2  421.66   13.60
  -1   2   2  433.26   13.40
  -1   2   2  409.86   13.70
   0  -2  -2 2054.59   60.89
   0   2   2 2095.59   60.09
   0   2   2 2106.29   61.29
   1   2   2 3801.02  110.19
  -2  -2  -2  649.34   20.20
  -2  -2  -2  614.34   19.60
   2   2   2  669.53   19.60
  -3  -2  -2 1031.10   31.00
   3   2   2 1014.00   29.40
   3   2   2 1000.00   30.60
  -4  -2  -2 1633.64   48.00
  -4  -2  -2 1556.84   46.40
   4   2   2 1589.14   47.70
   4   2   2 1614.94   46.30
  -5  -2  -2  135.39    6.00
  -5  -2  -2  130.89    4.80
   5   2   2  150.88    6.20
   5   2   2  150.38    4.90
  -6  -2  -2  265.97    9.80
  -6  -2  -2  249.68    8.40
   6   2   2  263.27   10.20
   6   2   2  262.67    8.40
  -7  -2  -2  515.65   17.10
   7   2   2  499.25   15.60
   7   2   2  498.95   17.60
  -8  -2  -2  273.07   10.20
   8   2   2  270.27   11.20
  -9  -2  -2   26.70    3.40
   9   2   2   28.30    4.20
  10  -3  -2   33.70    3.50
  10  -3  -2   33.20    3.00
   9  -3  -2    9.60    1.90
   9  -3  -2   10.40    2.10
   8  -3  -2  121.39    5.80
   8  -3  -2  121.89    6.40
   7  -3  -2  404.36   13.80
   7  -3  -2  390.96   14.10
   7  -3  -2  390.16   14.30
   6  -3  -2  115.99    5.30
   6  -3  -2  115.09    5.60
   6  -3  -2  123.49    5.50
   5  -3  -2  119.19    5.40
   5  -3  -2  120.79    5.20
   5  -3  -2  127.19    5.30
   4  -3  -2 2120.59   62.39
   4  -3  -2 2123.49   62.29
   4  -3  -2 2094.29   61.19
   4  -3  -2 2140.49   62.49
   3  -3  -2  523.95   16.10
   3  -3  -2  506.95   15.60
   3  -3  -2  513.25   16.20
   3  -3  -2  531.15   16.10
  -3   3   2  517.55   15.50
  -3   3   2  499.05   16.10
   2  -3  -2  367.56   11.70
   2  -3  -2  369.46   11.60
   2  -3  -2  354.06   11.70
  -2   3   2  374.26   11.60
  -2   3   2  386.16   11.70
  -2   3   2  354.96   11.50
   1  -3  -2 1146.39   33.30
   1  -3  -2 1141.29   33.60
   1  -3  -2 1141.89   33.00
  -1   3   2 1072.79   33.40
  -1   3   2 1112.19   33.20
  -1   3   2 1129.29   33.00
   0  -3  -2 1856.11   51.09
   0  -3  -2 1713.73   51.09
   0  -3  -2 1775.82   51.59
   0   3   2 1703.33   50.49
   0   3   2 1686.03   51.49
  -1  -3  -2  369.36   11.60
  -1  -3  -2  382.36   12.40
   1   3   2  360.86   11.60
  -2  -3  -2  650.93   19.90
   2   3   2  586.64   18.90
  -3  -3  -2 1467.35   44.10
   3   3   2 1442.76   43.30
  -4  -3  -2  303.47   11.10
   4   3   2  301.97   10.60
  -5  -3  -2   21.60    2.30
   5   3   2   16.70    2.30
  -6  -3  -2  207.08    8.70
   6   3   2  215.88    8.70
  -7  -3  -2  432.36   15.70
   7   3   2  465.55   16.30
  -8  -3  -2   78.19    4.60
   8   3   2   69.09    4.70
  -9  -3  -2   66.79    4.30
   9   3   2   68.29    4.90
  10  -4  -2   12.50    2.60
  10  -4  -2    9.90    1.80
   9  -4  -2   26.10    2.90
   9  -4  -2   23.70    2.40
   8  -4  -2   41.60    3.10
   8  -4  -2   42.70    3.50
   7  -4  -2  115.49    5.50
   7  -4  -2  114.79    5.90
   7  -4  -2  113.59    5.60
   6  -4  -2   38.10    2.90
   6  -4  -2   40.50    2.90
   6  -4  -2   40.00    2.80
   5  -4  -2  151.98    6.20
   5  -4  -2  153.58    6.30
   5  -4  -2  152.28    6.40
   4  -4  -2  733.93   22.60
   4  -4  -2  731.73   21.80
   4  -4  -2  717.53   22.60
   4  -4  -2  725.53   22.80
   3  -4  -2  358.06   11.60
   3  -4  -2  354.56   12.10
   3  -4  -2  357.26   11.40
   3  -4  -2  359.06   11.60
  -3   4   2  343.27   11.50
   2  -4  -2  244.88    8.40
   2  -4  -2  264.57    8.70
   2  -4  -2  263.07    8.80
  -2   4   2  257.97    8.60
  -2   4   2  242.78    8.50
   1  -4  -2  915.11   26.80
   1  -4  -2  895.01   26.40
   1  -4  -2  895.81   27.20
  -1   4   2  882.61   26.70
  -1   4   2  852.21   26.30
   0  -4  -2   62.19    3.30
   0  -4  -2   58.99    2.30
   0  -4  -2   58.99    2.60
   0  -4  -2   66.39    3.20
   0   4   2   59.49    2.40
  -1  -4  -2   95.79    4.10
  -1  -4  -2   94.39    4.60
   1   4   2   98.69    3.20
  -2  -4  -2  208.68    8.50
   2   4   2  231.68    7.80
  -3  -4  -2  219.28    9.00
   3   4   2  240.98    8.40
  -4  -4  -2   66.49    4.20
   4   4   2   70.19    3.60
  -5  -4  -2   61.79    4.00
   5   4   2   58.79    3.60
   6   4   2  114.79    5.80
  -7  -4  -2   72.29    4.80
   7   4   2   78.39    4.70
  -8  -4  -2   15.70    2.60
   8   4   2   21.00    3.10
  10  -5  -2    9.50    2.10
  10  -5  -2   10.70    2.30
   9  -5  -2    1.50    1.50
   9  -5  -2    0.00    0.80
   8  -5  -2   29.00    2.70
   8  -5  -2   26.80    2.90
   8  -5  -2   33.90    3.00
   7  -5  -2   63.49    4.10
   7  -5  -2   54.09    3.60
   7  -5  -2   52.99    3.60
   6  -5  -2    7.90    1.70
   6  -5  -2    9.30    1.70
   6  -5  -2   11.50    1.80
   5  -5  -2   17.30    1.70
   5  -5  -2   16.40    1.30
   5  -5  -2   19.80    2.00
   5  -5  -2   15.80    1.70
   4  -5  -2  274.47    9.90
   4  -5  -2  276.07   10.00
   4  -5  -2  290.07    9.90
   4  -5  -2  285.07    9.50
   3  -5  -2  148.39    5.80
   3  -5  -2  148.59    5.80
   3  -5  -2  143.59    5.70
   2  -5  -2   29.90    1.90
   2  -5  -2   32.50    2.30
   2  -5  -2   33.20    2.30
   1  -5  -2  471.95   14.60
   1  -5  -2  502.25   15.80
   1  -5  -2  473.35   15.00
  -1   5   2  440.56   14.60
   0  -5  -2  603.34   18.90
   0  -5  -2  603.64   19.70
   0  -5  -2  608.54   18.10
   0   5   2  606.14   18.20
  -1  -5  -2  324.97   11.80
  -1  -5  -2  321.27   11.00
  -2  -5  -2  117.89    5.80
   2   5   2  124.49    5.00
  -3  -5  -2   95.59    5.20
   3   5   2   92.89    4.30
  -4  -5  -2    8.20    2.00
   4   5   2    8.40    1.50
  -5  -5  -2   23.60    2.80
   5   5   2   31.00    2.50
  -6  -5  -2    7.70    2.10
   6   5   2    6.00    1.40
  -7  -5  -2   28.40    3.70
   7   5   2   24.60    2.80
  -8  -5  -2   35.00    3.60
   8   5   2   29.10    5.30
  10  -6  -2    8.40    2.70
  10  -6  -2    7.00    1.80
   9  -6  -2   39.90    3.40
   9  -6  -2   46.90    4.00
   8  -6  -2  167.08    7.60
   8  -6  -2  174.78    8.10
   8  -6  -2  151.98    7.40
   7  -6  -2   75.59    4.50
   7  -6  -2   75.49    4.40
   7  -6  -2   81.79    5.00
   6  -6  -2   54.89    3.80
   6  -6  -2   55.19    3.50
   6  -6  -2   60.49    3.60
   6  -6  -2   58.69    2.60
   5  -6  -2  349.77   12.50
   5  -6  -2  329.17   11.60
   5  -6  -2  358.56   12.30
   5  -6  -2  349.17   12.00
   4  -6  -2  312.17   10.80
   4  -6  -2  309.67   11.00
   4  -6  -2  316.97   10.90
   4  -6  -2  319.37   11.20
   3  -6  -2    2.80    0.80
   3  -6  -2    2.40    0.80
   3  -6  -2    2.70    0.80
   2  -6  -2  369.36   13.00
   2  -6  -2  379.76   12.30
   2  -6  -2  382.76   12.60
   1  -6  -2  803.32   23.90
   1  -6  -2  792.72   25.30
   1  -6  -2  778.72   24.40
   0  -6  -2  182.58    7.70
   0  -6  -2  177.78    6.90
   0  -6  -2  193.78    6.10
   0   6   2  172.78    6.10
  -1  -6  -2  149.99    6.90
  -1  -6  -2  152.28    6.20
   1   6   2  144.49    4.80
  -2  -6  -2  160.78    6.70
  -2  -6  -2  161.68    7.40
  -3  -6  -2  299.47   12.10
   3   6   2  322.77   11.10
  -4  -6  -2    0.50    1.00
  -5  -6  -2   55.39    4.40
   5   6   2   59.99    3.80
  -6  -6  -2  145.89    7.70
   6   6   2  144.49    6.90
  -7  -6  -2   43.30    4.20
   7   6   2   48.20    3.90
  10  -7  -2   30.00    4.20
  10  -7  -2   27.60    3.10
   9  -7  -2  152.08    8.00
   9  -7  -2  134.69    7.10
   8  -7  -2  115.29    6.10
   8  -7  -2  124.79    6.70
   8  -7  -2  111.89    5.90
   7  -7  -2   21.40    3.00
   7  -7  -2   19.40    2.20
   7  -7  -2   22.80    2.40
   6  -7  -2  320.27   12.60
   6  -7  -2  344.87   12.50
   6  -7  -2  331.37   12.30
   6  -7  -2  339.17   12.10
   5  -7  -2  554.44   17.70
   5  -7  -2  553.74   18.00
   5  -7  -2  541.45   18.50
   4  -7  -2   78.19    4.20
   4  -7  -2   75.99    4.00
   4  -7  -2   76.79    3.90
   4  -7  -2   78.59    4.10
   3  -7  -2  251.97    9.20
   3  -7  -2  264.17    9.70
   3  -7  -2  252.97    9.20
   2  -7  -2  395.06   14.10
   2  -7  -2  400.96   13.40
   2  -7  -2  403.66   13.10
   1  -7  -2  339.17   11.10
   1  -7  -2  351.66   12.70
   1  -7  -2  333.27   11.60
   0  -7  -2  135.79    5.70
   0  -7  -2  136.49    4.80
   0  -7  -2  131.09    6.50
   0   7   2  134.59    4.90
  -1  -7  -2  364.86   13.40
  -1  -7  -2  353.26   12.30
   1   7   2  334.97   10.60
  -2  -7  -2  542.25   20.10
  -2  -7  -2  556.24   18.40
  -3  -7  -2  135.69    7.10
  -4  -7  -2  117.49    6.80
   4   7   2  122.99    5.80
  -5  -7  -2  243.48   11.20
   5   7   2  263.27   10.20
  -6  -7  -2  182.78    9.20
   6   7   2  177.08    8.10
  -7  -7  -2   22.90    3.70
   7   7   2   25.10    2.90
   9  -8  -2   62.49    4.50
   9  -8  -2   68.99    5.20
   8  -8  -2   31.60    3.60
   8  -8  -2   26.10    2.70
   8  -8  -2   27.40    2.90
   7  -8  -2  108.89    5.50
   7  -8  -2  104.79    5.70
   7  -8  -2  113.39    6.30
   6  -8  -2  174.78    6.70
   6  -8  -2  172.68    7.30
   6  -8  -2  168.18    7.60
   6  -8  -2  167.78    7.90
   5  -8  -2   65.89    3.90
   5  -8  -2   61.49    3.60
   5  -8  -2   63.69    3.60
   4  -8  -2   99.49    5.00
   4  -8  -2   93.09    4.60
   4  -8  -2   94.19    4.70
   4  -8  -2   92.79    4.90
   3  -8  -2  340.97   12.00
   3  -8  -2  348.37   12.80
   3  -8  -2  353.26   12.00
   2  -8  -2  501.35   16.90
   2  -8  -2  528.45   16.50
   2  -8  -2  511.85   17.90
   1  -8  -2   94.09    5.50
   1  -8  -2  105.49    4.30
   1  -8  -2  102.99    4.70
   0  -8  -2  244.48    9.20
  -1  -8  -2  431.26   14.80
  -1  -8  -2  428.26   16.10
  -2  -8  -2  387.26   13.60
  -2  -8  -2  363.46   14.60
  -3  -8  -2  227.18   10.40
  -3  -8  -2  227.38    9.50
  -4  -8  -2  245.38   10.30
  -4  -8  -2  237.08   11.10
  -5  -8  -2  315.27   13.60
  -6  -8  -2   40.30    4.30
   6   8   2   37.00    3.30
   9  -9  -2    0.90    1.10
   9  -9  -2    0.90    1.80
   8  -9  -2   23.70    2.70
   8  -9  -2   20.60    3.10
   8  -9  -2   24.10    3.70
   7  -9  -2   47.80    3.60
   7  -9  -2   45.10    3.80
   7  -9  -2   40.60    2.80
   7  -9  -2   40.90    3.90
   6  -9  -2   47.40    3.10
   6  -9  -2   48.30    3.50
   6  -9  -2   44.80    3.20
   6  -9  -2   46.00    3.90
   5  -9  -2    8.30    1.70
   5  -9  -2    8.00    1.50
   5  -9  -2    6.40    1.70
   5  -9  -2    6.40    1.60
   4  -9  -2  125.69    5.80
   4  -9  -2  120.99    6.00
   4  -9  -2  128.69    6.30
   4  -9  -2  131.19    5.70
   3  -9  -2  132.59    6.60
   3  -9  -2  133.19    5.80
   3  -9  -2  128.69    5.80
   2  -9  -2  121.69    5.60
   2  -9  -2  121.29    5.20
   2  -9  -2  127.19    9.30
   1  -9  -2   59.49    3.00
   1  -9  -2   56.29    3.50
   1  -9  -2   56.59    4.30
   0  -9  -2  355.06   14.20
   0  -9  -2  369.76   13.00
  -1  -9  -2  280.47   12.00
  -1  -9  -2  279.97   10.70
  -2  -9  -2   36.00    3.70
  -2  -9  -2   38.10    3.10
  -3  -9  -2   85.19    5.90
  -3  -9  -2   87.19    5.20
  -4  -9  -2  129.99    6.90
  -4  -9  -2  123.09    7.70
  -5  -9  -2   13.40    2.70
  -5  -9  -2   15.50    4.00
   8 -10  -2   18.50    4.00
   8 -10  -2   15.60    2.70
   8 -10  -2   12.40    2.30
   7 -10  -2    6.30    2.30
   7 -10  -2    3.10    1.60
   7 -10  -2    5.50    1.70
   7 -10  -2    8.60    2.10
   6 -10  -2   16.10    2.10
   6 -10  -2   15.70    2.50
   6 -10  -2   16.60    2.40
   6 -10  -2   16.50    2.80
   5 -10  -2   36.90    3.30
   5 -10  -2   45.80    3.70
   5 -10  -2   37.10    3.10
   5 -10  -2   37.90    2.90
   4 -10  -2   28.90    3.00
   4 -10  -2   25.70    2.40
   4 -10  -2   27.60    2.40
   3 -10  -2   74.99    4.10
   3 -10  -2   76.39    5.00
   2 -10  -2   37.00    2.60
   2 -10  -2   37.70    3.60
   2 -10  -2   41.70    3.00
   1 -10  -2  187.28    9.10
   1 -10  -2  196.28    7.90
   1 -10  -2  186.28    7.00
   0 -10  -2   46.50    3.30
   0 -10  -2   46.10    4.00
  -1 -10  -2   19.70    3.10
  -1 -10  -2   20.20    2.40
  -2 -10  -2   18.90    3.20
  -2 -10  -2   21.60    2.70
  -3 -10  -2   20.50    3.30
  -3 -10  -2   23.50    3.00
  -4 -10  -2   37.90    3.70
  -4 -10  -2   23.70    4.20
   7 -11  -2   74.09    4.50
   7 -11  -2   69.89    4.50
   7 -11  -2   86.49    5.70
   7 -11  -2   70.99    5.20
   6 -11  -2   96.59    5.90
   6 -11  -2   87.69    5.20
   6 -11  -2   81.89    4.90
   6 -11  -2   85.59    5.10
   5 -11  -2   11.20    1.90
   5 -11  -2   10.50    2.00
   5 -11  -2   11.50    2.30
   5 -11  -2    9.80    2.10
   4 -11  -2   38.00    3.60
   4 -11  -2   38.90    3.00
   4 -11  -2   37.50    3.00
   3 -11  -2  141.59    6.30
   3 -11  -2  133.19    6.10
   3 -11  -2  142.09    7.50
   2 -11  -2   56.69    3.30
   2 -11  -2   51.09    4.40
   2 -11  -2   53.79    3.60
   1 -11  -2   59.99    4.40
   1 -11  -2   68.09    5.10
   0 -11  -2   99.69    6.50
   0 -11  -2   99.29    5.50
  -1 -11  -2   58.19    5.10
  -1 -11  -2   80.89    4.80
  -2 -11  -2   13.50    2.50
  -2 -11  -2   18.40    4.30
  -3 -11  -2   22.70    3.20
  -3 -11  -2   18.20    3.60
   6 -12  -2   12.50    2.70
   6 -12  -2    6.90    2.00
   5 -12  -2  127.49    6.20
   5 -12  -2  110.49    6.50
   5 -12  -2  115.79    6.60
   5 -12  -2  125.69    7.00
   4 -12  -2  105.39    5.50
   4 -12  -2  110.39    5.60
   4 -12  -2  102.69    6.30
   3 -12  -2   65.79    4.90
   3 -12  -2   69.69    4.80
   3 -12  -2   63.89    3.90
   2 -12  -2   27.50    2.50
   2 -12  -2   31.50    3.50
   2 -12  -2   28.90    2.90
   1 -12  -2  166.38    9.10
   1 -12  -2  174.28    7.70
   0 -12  -2  163.88   11.20
   0 -12  -2  156.78    7.40
  -1 -12  -2   43.00    3.70
  -1 -12  -2   53.69    5.00
   4 -13  -2   92.49    7.60
   3 -13  -2    5.80    1.70
   3 -13  -2    4.10    1.50
   3 -13  -2    2.40    1.90
   2 -13  -2   67.09    5.50
   2 -13  -2   77.39    4.60
   1 -13  -2  188.58    9.80
   1 -13  -2  168.68    8.00
  -1 -14   3   51.29    2.80
  -1 -14   3   57.49    5.20
  -1 -14   3   50.49    3.30
   0 -14   3  205.48    7.70
   0 -14   3  204.88    7.50
   0 -14   3  177.98   11.20
   1 -14   3  108.09    7.00
   1 -14   3  101.69    5.00
   2 -14   3   24.60    3.60
   2 -14   3   20.20    2.30
   3 -14   3  143.79    6.80
   3 -14   3  142.59    7.90
   4 -14   3  158.58    7.50
   4 -14   3  157.08    8.30
   4 -14   3  157.18    8.30
   5 -14   3   19.70    3.50
   5 -14   3   22.10    3.50
   5 -14   3   22.10    3.40
  -3 -13   3   55.29    3.90
  -3 -13   3   55.49    5.10
  -2 -13   3    3.30    1.30
  -2 -13   3    1.60    1.70
  -1 -13   3  167.38    9.00
  -1 -13   3  167.98    6.70
  -1 -13   3  164.38    6.20
   0 -13   3  162.18    8.50
   0 -13   3  150.48    6.10
   0 -13   3  148.09    5.90
   1 -13   3   21.60    2.00
   1 -13   3   17.00    2.80
   2 -13   3  139.49    7.60
   2 -13   3  136.09    6.20
   3 -13   3  142.89    7.60
   3 -13   3  141.39    6.60
   4 -13   3   26.30    2.70
   4 -13   3   25.40    2.90
   4 -13   3   20.10    3.20
   5 -13   3   36.70    4.00
   5 -13   3   35.70    3.10
   5 -13   3   33.00    3.50
   6 -13   3   93.69    5.80
   6 -13   3   96.29    5.70
   6 -13   3  110.49    6.80
  -4 -12   3   11.20    2.00
  -4 -12   3   12.10    3.50
  -3 -12   3    7.20    1.60
  -3 -12   3    6.20    2.00
  -2 -12   3  101.19    4.90
  -2 -12   3   97.79    6.50
  -1 -12   3  144.29    5.50
  -1 -12   3  142.49    5.80
  -1 -12   3  140.89    7.80
   0 -12   3    6.70    1.10
   0 -12   3    6.50    1.80
   0 -12   3    4.20    1.10
   1 -12   3   14.00    1.90
   1 -12   3   13.40    2.50
   2 -12   3  141.09    6.30
   2 -12   3  141.69    7.30
   3 -12   3   45.80    3.30
   3 -12   3   45.20    3.70
   4 -12   3    2.10    1.30
   4 -12   3    3.70    1.40
   4 -12   3    1.20    1.10
   5 -12   3   49.30    3.90
   5 -12   3   53.09    3.80
   5 -12   3   46.00    4.10
   6 -12   3   40.30    3.50
   6 -12   3   42.30    4.00
   6 -12   3   46.50    3.80
   7 -12   3    1.70    1.60
   7 -12   3   -0.10    1.50
   7 -12   3    1.80    1.20
  -6 -11   3    8.60    2.40
  -5 -11   3   32.20    3.90
  -4 -11   3   57.79    4.90
  -3 -11   3   74.59    5.40
  -2 -11   3   74.39    5.30
  -2 -11   3   77.09    4.00
  -1 -11   3   80.09    5.40
  -1 -11   3   81.89    3.90
  -1 -11   3   88.99    3.80
   0 -11   3   49.60    2.60
   0 -11   3   51.99    4.10
   0 -11   3   54.69    3.00
   1 -11   3   42.00    2.80
   1 -11   3   42.80    3.60
   1 -11   3   44.00    2.20
   2 -11   3    1.80    0.90
   2 -11   3    2.40    1.00
   3 -11   3   45.70    3.50
   3 -11   3   41.70    3.10
   4 -11   3    1.20    1.10
   4 -11   3    3.80    1.50
   4 -11   3    0.90    1.10
   5 -11   3   34.30    3.00
   5 -11   3   43.40    3.80
   6 -11   3   53.09    3.60
   6 -11   3   53.69    4.50
   6 -11   3   62.99    4.20
   7 -11   3   14.00    2.50
   7 -11   3   18.40    2.50
   7 -11   3   16.10    2.90
   8 -11   3   19.10    2.90
   8 -11   3   28.30    4.20
  -6 -10   3   36.50    4.10
  -5 -10   3  165.88    8.80
  -4 -10   3   73.89    5.30
  -3 -10   3   55.09    4.40
  -2 -10   3  284.77   11.90
  -1 -10   3  138.39    5.50
  -1 -10   3  138.79    7.00
  -1 -10   3  137.79    5.30
   0 -10   3   74.69    4.70
   0 -10   3   77.79    3.60
   0 -10   3   71.29    3.20
   1 -10   3  158.58    6.30
   1 -10   3  157.18    7.50
   2 -10   3  327.87   12.40
   2 -10   3  322.37   11.50
   3 -10   3  185.98    7.70
   3 -10   3  174.28    7.70
   4 -10   3   16.60    2.50
   4 -10   3   16.10    2.00
   4 -10   3   19.20    2.50
   5 -10   3  134.89    6.20
   5 -10   3  136.69    6.80
   5 -10   3  126.89    6.40
   6 -10   3   51.59    3.30
   6 -10   3   44.30    4.00
   6 -10   3   48.90    3.60
   7 -10   3   29.70    3.50
   7 -10   3   30.40    2.50
   7 -10   3   27.90    2.90
   8 -10   3   38.50    4.20
   8 -10   3   29.40    4.60
  -7  -9   3   46.90    4.50
   6   9  -3  290.57   11.50
  -6  -9   3  275.37   12.40
  -5  -9   3  171.18    8.70
  -4  -9   3   78.69    5.20
  -3  -9   3  582.44   20.20
  -3  -9   3  558.94   17.00
  -2  -9   3  589.44   17.90
  -1  -9   3  281.17    9.20
  -1  -9   3  259.47    9.10
  -1  -9   3  275.87   10.80
   0  -9   3   76.59    3.30
   0  -9   3   85.09    4.80
   0  -9   3   86.99    3.80
   1  -9   3  584.54   18.30
   1  -9   3  557.74   19.20
   2  -9   3  458.85   15.80
   2  -9   3  464.75   15.40
   3  -9   3  135.29    5.90
   3  -9   3  133.39    6.00
   4  -9   3  243.88   11.00
   4  -9   3  241.78    9.20
  -5   9  -3  246.18    8.70
   5  -9   3  266.37   10.30
   5  -9   3  274.87    9.80
   5  -9   3  280.07   10.80
   6  -9   3   66.49    3.60
   6  -9   3   67.59    4.30
   6  -9   3   70.59    4.80
   7  -9   3   32.30    3.00
   7  -9   3   37.90    2.60
   7  -9   3   36.40    3.70
   8  -9   3   83.39    5.10
   8  -9   3   76.49    3.70
   8  -9   3   85.89    5.80
   9  -9   3   54.89    4.90
   9  -9   3   56.79    4.20
   8   8  -3   12.40    2.20
  -8  -8   3   11.40    2.70
   7   8  -3  239.58   10.30
  -7  -8   3  246.98   11.00
   6   8  -3  308.07   11.60
  -6  -8   3  278.07   12.20
   5   8  -3   78.39    4.50
  -5  -8   3   85.99    5.30
   4   8  -3  328.77   11.90
  -3  -8   3  822.32   24.30
  -3  -8   3  819.12   26.90
  -2  -8   3   68.59    4.20
  -2  -8   3   70.79    3.00
  -1  -8   3  349.67   11.40
  -1  -8   3  359.06   13.00
   0  -8   3  723.13   21.80
   0  -8   3  678.83   21.10
   0  -8   3  720.13   22.90
   1  -8   3 1185.48   37.00
   1  -8   3 1226.08   36.30
   2  -8   3  226.88    8.40
   2  -8   3  207.08    8.00
   3  -8   3  298.27   10.90
   3  -8   3  317.77   11.00
   4  -8   3  392.56   13.90
   4  -8   3  393.06   13.30
   4  -8   3  395.26   13.70
  -5   8  -3  293.97   10.30
   5  -8   3  322.67   11.60
   5  -8   3  319.27   10.90
   6  -8   3   91.19    4.90
   6  -8   3   81.69    4.00
   6  -8   3   81.29    5.10
   7  -8   3  263.87   10.80
   7  -8   3  274.77    9.40
   7  -8   3  276.37   11.50
   8  -8   3  241.18    8.80
   8  -8   3  245.58   10.20
   8  -8   3  239.58   10.90
   9  -8   3   13.90    4.30
   8   7  -3   39.30    3.60
  -8  -7   3   46.80    4.10
   7   7  -3  123.59    6.30
  -7  -7   3  115.99    6.50
   6   7  -3   24.90    2.40
  -6  -7   3   25.30    3.00
   5   7  -3    7.30    1.60
  -5  -7   3    4.20    1.40
   4   7  -3  478.15   15.90
  -4  -7   3  462.65   14.20
  -4  -7   3  491.15   16.90
   3   7  -3  523.75   16.90
  -3  -7   3  518.15   15.70
  -3  -7   3  515.05   17.70
  -2  -7   3    0.30    0.60
  -2  -7   3    1.50    0.50
   1   7  -3  399.16   13.30
  -1  -7   3  445.46   13.50
  -1  -7   3  439.06   14.60
   0  -7   3 1083.29   32.90
   0  -7   3 1140.99   33.70
   0  -7   3 1152.88   34.50
   1  -7   3   46.20    2.80
   1  -7   3   44.00    2.50
   2  -7   3   99.69    4.40
   3  -7   3  254.07    9.30
   3  -7   3  262.07    9.40
   4  -7   3  705.43   22.40
   4  -7   3  677.83   22.10
   5  -7   3   67.49    4.20
   5  -7   3   71.89    4.00
   6  -7   3  119.59    6.20
   6  -7   3  114.59    5.70
   7  -7   3  278.17   10.80
   7  -7   3  275.37   11.50
   8  -7   3  105.39    6.40
   8  -7   3  104.09    4.40
   8  -7   3  108.19    5.70
   9  -7   3    5.60    1.60
   9  -7   3    3.90    1.70
   9   6  -3   16.40    2.80
  -9  -6   3   18.00    2.90
   8   6  -3   25.50    2.80
  -8  -6   3   30.60    3.30
   7   6  -3   18.90    2.20
  -7  -6   3   25.80    2.80
   6   6  -3   36.00    2.80
  -6  -6   3   31.00    1.90
  -6  -6   3   32.00    3.00
   5   6  -3  216.18    8.50
  -5  -6   3  207.48    6.90
  -5  -6   3  226.08    9.00
  -5  -6   3  225.68    7.10
   4   6  -3  350.36   12.10
  -4  -6   3  356.46   10.90
  -4  -6   3  347.47   10.70
  -4  -6   3  348.77   12.70
   3   6  -3  196.18    7.40
  -3  -6   3  200.58    8.00
  -3  -6   3  201.78    6.50
  -2  -6   3  416.66   13.90
  -2  -6   3  398.86   12.60
  -1  -6   3  422.76   13.70
  -1  -6   3  411.66   12.80
  -1  -6   3  391.36   12.90
   0   6  -3  624.94   19.10
   1  -6   3  504.45   15.90
   2  -6   3  287.77    9.90
  -3   6  -3  369.16   11.40
   3  -6   3  365.76   12.50
   3  -6   3  384.16   12.60
  -4   6  -3   65.09    2.90
   4  -6   3   70.59    3.90
   4  -6   3   74.69    3.80
   5  -6   3  255.47   10.00
   5  -6   3  261.57    9.70
   6  -6   3  100.19    5.00
   6  -6   3   94.39    6.10
   7  -6   3   34.20    3.10
   7  -6   3   33.30    2.80
   8  -6   3   22.90    3.30
   8  -6   3   26.80    2.60
   9  -6   3   26.10    2.70
   9  -6   3   28.70    3.90
   9   5  -3   -0.60    0.90
  -9  -5   3    2.00    1.50
   8   5  -3   93.09    5.40
  -8  -5   3   98.09    5.20
   7   5  -3  171.58    7.70
  -7  -5   3  175.48    7.50
   6   5  -3   24.70    2.50
  -6  -5   3   17.70    2.40
  -6  -5   3   13.80    1.30
   5   5  -3    7.50    1.40
  -5  -5   3   10.80    1.00
  -5  -5   3   10.30    1.80
   4   5  -3  740.13   23.60
  -4  -5   3  747.93   24.00
  -4  -5   3  789.62   22.70
   3   5  -3  555.94   17.20
  -3  -5   3  536.35   16.40
  -3  -5   3  544.05   17.70
   2   5  -3   13.90    1.20
  -2  -5   3   16.90    1.50
  -2  -5   3   16.50    1.30
  -2  -5   3   17.40    1.10
  -1  -5   3  240.18    7.80
  -1  -5   3  240.48    7.70
   0   5  -3  221.18    7.60
   0  -5   3  238.88    7.70
   1  -5   3  258.67    8.70
   2  -5   3   45.40    2.50
  -3   5  -3  448.96   14.00
   3  -5   3  453.15   14.90
   3  -5   3  480.05   15.00
  -4   5  -3  122.79    4.60
   4  -5   3  118.89    5.40
   4  -5   3  115.29    4.90
   4  -5   3  119.49    5.20
   5  -5   3   10.70    1.60
   5  -5   3    8.50    1.70
   6  -5   3   21.40    2.40
   6  -5   3   20.90    2.00
   7  -5   3  130.09    6.20
   7  -5   3  145.29    7.00
   8  -5   3   15.00    2.20
   8  -5   3    8.40    1.90
   9  -5   3   33.40    2.90
   9  -5   3   32.40    3.40
  10  -5   3   38.30    3.20
  10  -5   3   34.80    3.70
   9   4  -3  101.49    6.00
  -9  -4   3  110.49    5.10
   8   4  -3  322.87   12.50
  -8  -4   3  316.27   11.40
   7   4  -3  240.08    9.70
  -7  -4   3  243.48    9.10
   6   4  -3   70.89    4.10
  -6  -4   3   79.59    4.10
   5   4  -3  374.36   12.80
  -5  -4   3  382.06   12.80
  -5  -4   3  364.66   11.70
  -4  -4   3  677.13   21.60
  -4  -4   3  705.63   20.70
   3   4  -3  167.08    6.10
  -3  -4   3  170.58    6.40
   2   4  -3  604.34   18.20
  -2  -4   3  575.64   18.10
  -2  -4   3  603.94   18.90
  -1  -4   3 2243.68   66.19
  -1  -4   3 2273.77   66.19
  -1  -4   3 2330.27   65.99
   0  -4   3 1116.89   32.90
   1  -4   3   80.69    3.30
  -2   4  -3 1224.68   35.30
   2  -4   3 1211.98   36.10
   2  -4   3 1212.28   36.20
  -3   4  -3  692.63   20.10
   3  -4   3  660.83   20.90
   3  -4   3  641.44   20.10
   3  -4   3  676.93   20.70
   4  -4   3  423.96   13.40
   4  -4   3  429.66   14.10
   4  -4   3  431.66   14.40
   5  -4   3  100.79    4.20
   5  -4   3  104.79    4.70
   5  -4   3  107.39    5.20
   6  -4   3  358.86   13.10
   6  -4   3  348.77   12.30
   7  -4   3  169.78    8.00
   7  -4   3  176.98    8.70
   8  -4   3   18.20    2.00
   8  -4   3   14.70    2.50
   9  -4   3   19.90    2.10
   9  -4   3   16.30    2.80
  10  -4   3   89.09    6.00
  10  -4   3   85.19    5.00
  10   3  -3   38.50    3.70
   9   3  -3  194.88    8.90
  -9  -3   3  186.08    6.90
   8   3  -3  233.28    9.90
  -8  -3   3  246.48    8.70
   7   3  -3   46.20    3.30
  -7  -3   3   46.10    2.70
   6   3  -3  181.38    7.30
  -6  -3   3  168.68    6.60
   5   3  -3  726.13   22.60
  -5  -3   3  710.03   22.90
   4   3  -3  291.77    9.70
  -4  -3   3  276.57    9.50
  -4  -3   3  278.67    9.00
   3   3  -3  619.54   19.40
  -3  -3   3  616.04   18.90
   2   3  -3 2132.09   61.19
   2   3  -3 2086.99   61.09
  -2  -3   3 2088.49   61.09
  -1  -3   3 2866.91   82.69
   0   3  -3  214.88    7.20
   0   3  -3  218.08    6.80
   0  -3   3  241.68    6.80
   0  -3   3  232.68    7.30
  -1   3  -3 1434.16   39.50
  -1   3  -3 1374.36   40.20
   1  -3   3 1302.07   40.20
  -2   3  -3 2038.70   61.49
   2  -3   3 2129.99   61.49
   2  -3   3 2154.28   61.49
  -3   3  -3  913.11   28.80
   3  -3   3 1000.10   29.40
   3  -3   3  969.70   28.80
   3  -3   3  988.40   29.20
   4  -3   3  300.47   10.20
   4  -3   3  301.77    9.90
   4  -3   3  304.77   10.70
   5  -3   3  790.22   24.40
   5  -3   3  790.32   25.10
   5  -3   3  779.82   24.00
   6  -3   3  362.26   13.50
   6  -3   3  381.86   12.80
   7  -3   3  124.29    5.50
   7  -3   3  115.39    6.10
   8  -3   3  188.88    8.60
   8  -3   3  172.38    7.40
   9  -3   3  146.19    6.80
   9  -3   3  160.68    8.00
  10  -3   3   37.00    3.90
  10  -3   3   42.10    3.20
  10   2  -3   55.79    7.90
   9   2  -3  203.38    9.20
   8   2  -3   26.10    2.70
  -8  -2   3   30.60    1.80
   7   2  -3  150.38    7.50
  -7  -2   3  143.69    5.40
   6   2  -3  518.05   17.30
  -6  -2   3  519.25   16.10
   5   2  -3  471.05   15.10
  -5  -2   3  440.46   14.20
   4   2  -3  116.39    4.70
   4   2  -3  114.29    4.90
  -4  -2   3  113.39    4.30
  -4  -2   3  122.39    4.40
   3   2  -3  617.94   18.40
   3   2  -3  640.64   18.80
  -3  -2   3  609.04   18.20
  -3  -2   3  607.74   18.10
  -3  -2   3  578.84   18.40
  -3  -2   3  562.84   18.60
   2   2  -3 1482.25   43.90
   2   2  -3 1494.15   44.20
  -2  -2   3 1528.05   44.00
  -2  -2   3 1526.55   44.20
   1   2  -3  869.41   25.60
   1   2  -3  869.11   25.40
  -1  -2   3  885.41   25.50
  -1  -2   3  866.31   25.60
   0   2  -3  536.65   15.90
   0  -2   3  526.35   16.10
   0  -2   3  552.04   15.80
  -1   2  -3 2270.07   65.79
  -2   2  -3  886.41   26.90
  -2   2  -3  888.41   26.90
  -2   2  -3  954.70   26.90
   2  -2   3  902.11   26.90
   2  -2   3  891.11   27.00
   2  -2   3  908.31   27.00
  -3   2  -3    9.50    0.90
  -3   2  -3    8.60    1.30
   3  -2   3   11.20    1.10
  -4   2  -3 1017.10   29.70
   4  -2   3  999.60   30.50
   4  -2   3 1006.70   30.00
   4  -2   3  956.90   29.90
  -5   2  -3  721.73   21.40
   5  -2   3  690.33   22.50
   5  -2   3  691.43   21.80
  -6   2  -3  234.68    7.90
   6  -2   3  224.98    8.30
   6  -2   3  224.68    9.10
  -7   2  -3  205.08    7.10
   7  -2   3  194.08    8.60
   7  -2   3  196.28    7.60
   8  -2   3  163.58    7.90
   9  -2   3   93.19    4.90
   9  -2   3   94.69    5.90
  10   1  -3   56.89    4.40
   9   1  -3   23.20    2.70
   8   1  -3   52.39    3.70
   7   1  -3  187.78    7.90
   6   1  -3  193.68    7.80
  -6  -1   3  199.08    6.40
   5   1  -3   26.20    2.10
   5   1  -3   28.40    2.10
  -5  -1   3   25.80    1.40
   4   1  -3  171.28    6.60
   4   1  -3  167.98    6.40
  -4  -1   3  183.68    5.70
   3   1  -3 1129.89   33.20
   3   1  -3 1115.79   33.50
  -3  -1   3 1131.49   33.30
  -3  -1   3 1134.89   33.00
  -3  -1   3 1095.09   33.40
   2   1  -3   49.20    2.30
   2   1  -3   45.50    2.00
  -2  -1   3   58.99    2.40
  -2  -1   3   59.49    2.20
   1   1  -3    5.20    0.60
   1   1  -3    4.20    0.30
  -1  -1   3    3.70    0.30
  -1  -1   3    3.70    0.50
  -1  -1   3    4.00    0.50
   0   1  -3  702.93   22.60
   0   1  -3  716.23   22.50
   0  -1   3  816.22   22.70
   0  -1   3  776.82   22.50
   0  -1   3  819.32   22.20
  -1   1  -3  698.33   21.10
  -1   1  -3  723.73   21.30
  -1   1  -3  712.43   21.00
   1  -1   3  710.33   21.30
   1  -1   3  732.73   21.00
   1  -1   3  690.23   21.10
  -2   1  -3   18.20    1.10
  -2   1  -3   16.80    1.20
   2  -1   3   16.90    1.20
   2  -1   3   18.10    1.40
   2  -1   3   19.60    1.20
  -3   1  -3  766.22   22.70
  -3   1  -3  746.53   22.50
   3  -1   3  749.53   23.40
   3  -1   3  761.22   22.50
   3  -1   3  717.23   22.80
  -4   1  -3  264.27    8.40
   4  -1   3  235.98    8.20
   4  -1   3  224.38    8.60
  -5   1  -3  365.76   11.80
   5  -1   3  348.17   12.50
   5  -1   3  363.66   11.80
  -6   1  -3   33.30    2.20
   6  -1   3   36.10    2.20
   6  -1   3   31.50    2.60
  -7   1  -3  360.56   11.70
   7  -1   3  344.57   13.10
   7  -1   3  336.97   11.80
  -8   1  -3  100.69    4.50
   8  -1   3  108.09    4.90
   8  -1   3  108.19    6.00
   9  -1   3   35.90    2.70
   9  -1   3   34.60    3.40
  10   0  -3   29.80    3.20
   9   0  -3   24.50    2.70
   8   0  -3   64.29    4.20
   7   0  -3   25.20    2.40
   7   0  -3   30.60    2.20
   6   0  -3   53.09    3.20
   6   0  -3   47.10    2.80
   6   0  -3   53.09    3.40
   5   0  -3   31.90    2.00
   5   0  -3   30.80    2.30
   5   0  -3   33.60    2.20
   4   0  -3  102.79    4.40
   4   0  -3  100.79    4.10
   4   0  -3   99.99    4.20
   3   0  -3  522.85   15.80
   3   0  -3  540.75   16.20
  -3   0   3  494.65   16.10
  -3   0   3  504.95   15.70
  -3   0   3  514.55   15.10
  -3   0   3  507.75   15.80
   2   0  -3  287.67    9.20
   2   0  -3  281.47    9.60
   2   0  -3  288.07    9.00
  -2   0   3  298.77    9.10
  -2   0   3  327.67    9.80
  -2   0   3  309.57    9.20
   1   0  -3  177.68    5.90
   1   0  -3  189.78    6.20
  -1   0   3  187.18    6.00
  -1   0   3  185.78    6.10
   0   0  -3  464.45   14.20
   0   0  -3  480.35   14.10
   0   0   3  447.96   14.20
   0   0   3  467.85   13.50
   0   0   3  456.65   14.00
  -1   0  -3    8.80    0.90
   1   0   3   13.70    0.80
   1   0   3   12.70    0.80
   1   0   3   11.60    1.20
  -2   0  -3  441.16   13.70
  -2   0  -3  457.95   14.00
  -2   0  -3  444.76   13.40
   2   0   3  433.46   14.10
   2   0   3  441.86   13.40
   2   0   3  435.26   13.70
  -3   0  -3  211.08    7.60
  -3   0  -3  213.48    7.40
   3   0   3  212.98    7.50
   3   0   3  219.48    7.10
  -4   0  -3  291.77    9.60
  -4   0  -3  292.57   10.10
   4   0   3  298.67    9.50
   4   0   3  295.77   10.30
  -5   0  -3  133.49    5.50
   5   0   3  132.99    5.90
   5   0   3  138.79    5.10
  -6   0  -3  227.28    8.30
   6   0   3  220.98    9.00
   6   0   3  229.08    7.90
  -7   0  -3  130.19    5.70
   7   0   3  137.49    5.50
   7   0   3  139.89    6.70
  -8   0  -3   33.70    2.50
   8   0   3   31.80    2.30
   8   0   3   28.50    2.90
  -9   0  -3   10.90    1.60
   9   0   3   10.00    2.20
   9   0   3   12.60    1.90
  10  -1  -3  137.59    7.40
   9  -1  -3   59.99    4.40
   8  -1  -3   43.20    3.40
   8  -1  -3   39.70    2.90
   7  -1  -3  363.06   12.80
   7  -1  -3  382.16   13.50
   7  -1  -3  370.06   13.50
   6  -1  -3  304.07   11.00
   6  -1  -3  305.87   10.60
   6  -1  -3  297.37   11.10
   5  -1  -3   45.40    2.50
   5  -1  -3   42.30    2.80
   5  -1  -3   46.90    2.80
   4  -1  -3  107.99    4.50
   4  -1  -3  105.49    4.30
   3  -1  -3  357.86   11.50
   3  -1  -3  378.86   12.50
   3  -1  -3  385.76   12.50
   3  -1  -3  359.96   12.20
  -3   1   3  418.56   12.70
  -3   1   3  413.76   12.30
  -3   1   3  404.26   11.60
   2  -1  -3  248.58    8.30
   2  -1  -3  256.87    8.70
   2  -1  -3  245.68    8.20
  -2   1   3  285.87    8.80
  -2   1   3  275.67    8.40
  -2   1   3  281.17    8.50
   1  -1  -3  378.76   12.20
   1  -1  -3  380.26   12.10
  -1   1   3  395.76   12.20
  -1   1   3  411.46   12.00
   0  -1  -3  620.04   19.20
   0  -1  -3  631.84   18.60
   0  -1  -3  616.54   19.40
   0   1   3  681.83   19.60
  -1  -1  -3  688.83   21.10
  -1  -1  -3  659.83   20.30
   1   1   3  684.83   21.10
   1   1   3  683.23   20.20
   1   1   3  708.63   20.30
  -2  -1  -3  145.29    5.40
  -2  -1  -3  162.68    6.00
   2   1   3  155.08    5.40
   2   1   3  151.38    5.00
  -3  -1  -3  120.69    4.20
  -3  -1  -3  125.79    5.20
   3   1   3  122.79    4.90
   3   1   3  128.19    4.30
  -4  -1  -3  459.15   14.90
   4   1   3  449.46   13.70
   4   1   3  437.56   14.70
  -5  -1  -3   32.30    2.40
  -5  -1  -3   26.00    1.70
   5   1   3   33.20    1.70
   5   1   3   36.10    2.50
  -6  -1  -3    7.10    1.50
   6   1   3    4.40    1.10
   6   1   3    5.20    0.90
  -7  -1  -3  149.69    6.50
   7   1   3  154.08    5.70
   7   1   3  156.48    7.30
  -8  -1  -3  138.09    6.10
   8   1   3  132.39    5.30
   8   1   3  128.49    6.80
  -9  -1  -3    6.60    2.20
   9   1   3    7.30    2.10
  10  -2  -3   77.29    5.40
   9  -2  -3   15.60    2.30
   9  -2  -3   14.90    2.50
   8  -2  -3  334.77   12.90
   8  -2  -3  339.37   12.30
   7  -2  -3  407.16   14.40
   7  -2  -3  418.06   14.00
   7  -2  -3  384.86   14.30
   6  -2  -3  267.27   10.20
   6  -2  -3  286.17   10.40
   6  -2  -3  266.77    9.80
   5  -2  -3  177.28    7.00
   5  -2  -3  171.88    6.70
   5  -2  -3  177.68    7.00
   4  -2  -3 1705.53   49.40
   4  -2  -3 1647.04   49.40
   4  -2  -3 1653.63   49.60
   3  -2  -3  658.33   20.40
   3  -2  -3  665.43   19.80
   3  -2  -3  683.83   20.70
   3  -2  -3  684.43   20.40
  -3   2   3  639.74   19.80
   2  -2  -3   18.60    1.30
   2  -2  -3   20.90    1.30
   2  -2  -3   21.10    1.50
   2  -2  -3   18.60    1.30
  -2   2   3   22.20    1.30
  -2   2   3   21.40    1.40
  -2   2   3   22.00    1.30
   1  -2  -3 1313.17   37.90
   1  -2  -3 1267.67   37.90
  -1   2   3 1284.87   38.00
  -1   2   3 1303.67   37.50
  -1   2   3 1235.28   37.80
   0  -2  -3 2430.96   71.09
   0   2   3 2432.46   70.19
  -1  -2  -3   63.89    2.70
  -1  -2  -3   69.49    3.30
   1   2   3   67.29    2.70
  -2  -2  -3  645.14   20.20
   2   2   3  626.94   18.60
   2   2   3  631.24   19.40
  -3  -2  -3 1063.09   32.70
   3   2   3 1054.89   32.10
   3   2   3 1076.79   31.00
  -4  -2  -3  335.67   11.70
   4   2   3  324.67   11.20
   4   2   3  312.97    9.90
  -5  -2  -3   41.00    3.00
   5   2   3   46.50    2.00
   5   2   3   48.20    3.00
  -6  -2  -3  278.37    9.50
  -6  -2  -3  299.37   11.20
   6   2   3  312.37   11.40
   6   2   3  310.17    9.50
  -7  -2  -3  515.85   17.90
   7   2   3  537.15   18.40
  -8  -2  -3   47.20    3.40
   8   2   3   44.40    4.00
  -9  -2  -3   12.70    2.10
   9   2   3   15.90    2.90
  10  -3  -3   34.20    3.50
  10  -3  -3   33.70    3.00
   9  -3  -3  120.69    6.10
   9  -3  -3  121.19    6.60
   8  -3  -3  304.77   11.50
   8  -3  -3  299.77   11.90
   8  -3  -3  307.97   11.90
   7  -3  -3  223.98    9.10
   7  -3  -3  217.68    9.10
   6  -3  -3  157.88    6.70
   6  -3  -3  151.38    6.70
   6  -3  -3  149.29    6.40
   5  -3  -3  810.82   25.50
   5  -3  -3  827.22   25.70
   5  -3  -3  824.42   25.80
   4  -3  -3 4321.47  124.59
   4  -3  -3 4337.17  125.59
   4  -3  -3 4349.76  125.69
  -4   3   3 4313.07  124.59
   3  -3  -3  251.27    8.90
   3  -3  -3  260.47    8.70
   3  -3  -3  268.17    8.90
   3  -3  -3  276.07    9.20
  -3   3   3  269.07    8.60
   2  -3  -3  489.95   15.00
   2  -3  -3  493.15   15.20
   2  -3  -3  497.35   15.30
  -2   3   3  442.76   15.00
   1  -3  -3 1019.90   29.20
  -1   3   3  953.30   29.40
  -1   3   3  960.60   29.40
  -1   3   3  952.30   28.70
   0  -3  -3  529.95   16.60
   0  -3  -3  538.65   17.60
   0   3   3  581.94   16.50
  -1  -3  -3  605.04   19.10
  -1  -3  -3  586.24   18.60
  -1  -3  -3  577.74   18.10
   1   3   3  598.14   18.00
   1   3   3  599.34   17.50
  -2  -3  -3 1417.96   42.20
   2   3   3 1358.86   41.10
  -3  -3  -3  854.91   26.80
   3   3   3  836.42   25.90
  -4  -3  -3  262.57    9.90
   4   3   3  242.18    9.10
  -5  -3  -3  169.48    7.60
   5   3   3  181.08    7.30
  -6  -3  -3  679.93   22.60
   6   3   3  672.43   22.30
  -7  -3  -3  119.79    6.30
   7   3   3  125.49    6.30
  -8  -3  -3   63.59    4.30
   8   3   3   60.59    4.40
  10  -4  -3   37.10    3.30
  10  -4  -3   36.10    3.70
   9  -4  -3  191.78    9.00
   9  -4  -3  192.18    8.50
   8  -4  -3  132.89    6.60
   8  -4  -3  130.59    6.30
   8  -4  -3  132.99    6.80
   7  -4  -3   46.20    3.40
   7  -4  -3   43.80    3.30
   7  -4  -3   45.50    3.20
   6  -4  -3  550.74   18.20
   6  -4  -3  524.05   17.90
   6  -4  -3  555.74   18.30
   5  -4  -3  151.08    5.10
   5  -4  -3  156.08    6.30
   5  -4  -3  147.39    6.30
   5  -4  -3  156.58    6.50
   4  -4  -3  139.19    5.70
   4  -4  -3  141.59    5.80
   4  -4  -3  136.39    5.10
   4  -4  -3  141.19    5.60
   3  -4  -3  196.58    7.20
   3  -4  -3  180.18    6.80
   3  -4  -3  194.18    6.90
   3  -4  -3  195.58    6.90
  -3   4   3  181.38    6.70
   2  -4  -3  404.96   12.80
   2  -4  -3  411.26   13.20
   2  -4  -3  386.06   13.10
   1  -4  -3 1152.08   34.40
   1  -4  -3 1154.78   33.40
   1  -4  -3 1158.88   34.00
  -1   4   3 1057.99   33.30
   0  -4  -3  482.25   15.60
   0  -4  -3  461.35   14.90
   0   4   3  451.65   14.10
  -1  -4  -3  405.46   13.50
  -1  -4  -3  399.76   14.00
   1   4   3  415.66   12.20
  -2  -4  -3  909.71   29.10
   2   4   3  928.71   27.90
  -3  -4  -3  107.89    5.40
   3   4   3   90.39    4.30
  -4  -4  -3  202.88    8.80
   4   4   3  214.78    8.10
  -6  -4  -3  146.49    7.40
   6   4   3  162.18    7.20
  -7  -4  -3   16.20    2.80
   7   4   3   12.70    2.20
  -8  -4  -3  193.98    8.90
   8   4   3  197.28    9.30
  10  -5  -3   32.70    5.60
  10  -5  -3   31.30    3.50
   9  -5  -3   47.60    3.80
   9  -5  -3   36.00    3.20
   9  -5  -3   44.30    4.00
   8  -5  -3   23.90    2.60
   8  -5  -3   23.60    2.60
   8  -5  -3   24.60    2.80
   7  -5  -3   75.39    4.70
   7  -5  -3   73.29    4.30
   7  -5  -3   73.09    4.30
   6  -5  -3  264.37   10.30
   6  -5  -3  268.97   10.10
   5  -5  -3   28.50    1.80
   5  -5  -3   27.70    2.40
   5  -5  -3   24.90    2.10
   5  -5  -3   31.50    2.40
   4  -5  -3   52.49    3.00
   4  -5  -3   48.80    2.90
   4  -5  -3   51.29    3.00
   3  -5  -3  274.17    9.50
   3  -5  -3  259.97    9.50
   3  -5  -3  266.87    9.30
   2  -5  -3  451.05   14.20
   2  -5  -3  452.55   14.90
   2  -5  -3  434.96   14.60
   1  -5  -3  220.78    8.70
   1  -5  -3  241.78    7.80
   1  -5  -3  221.88    8.20
   0  -5  -3  169.78    6.90
   0  -5  -3  158.58    6.20
   0   5   3  146.19    5.50
  -1  -5  -3  415.16   14.40
  -1  -5  -3  397.16   13.60
   1   5   3  403.16   12.20
  -2  -5  -3  106.79    5.10
  -2  -5  -3  109.29    5.60
   2   5   3  110.39    4.70
  -3  -5  -3   83.79    5.10
   3   5   3   87.59    4.20
  -4  -5  -3  133.69    6.80
   4   5   3  132.09    5.80
  -5  -5  -3  109.29    6.20
   5   5   3  102.99    5.20
  -6  -5  -3   10.50    2.30
   6   5   3    7.30    1.80
  -7  -5  -3   56.79    4.50
   7   5   3   52.99    3.90
  10  -6  -3   10.20    2.20
   9  -6  -3   54.29    4.30
   9  -6  -3   45.10    3.60
   9  -6  -3   47.90    3.90
   8  -6  -3   29.00    3.10
   8  -6  -3   22.70    2.50
   8  -6  -3   27.50    2.90
   7  -6  -3    6.90    1.50
   7  -6  -3    6.40    1.70
   7  -6  -3    7.00    1.80
   6  -6  -3   63.79    3.90
   6  -6  -3   62.19    2.90
   6  -6  -3   70.29    4.30
   6  -6  -3   67.49    3.90
   5  -6  -3  176.38    7.50
   5  -6  -3  179.08    6.80
   5  -6  -3  189.78    7.40
   5  -6  -3  181.38    7.40
   4  -6  -3   46.50    3.00
   4  -6  -3   48.70    2.90
   4  -6  -3   56.69    3.20
   4  -6  -3   47.50    2.90
   3  -6  -3   55.99    3.10
   3  -6  -3   56.99    3.30
   3  -6  -3   63.99    3.50
   2  -6  -3  439.96   14.70
   2  -6  -3  451.55   14.20
   2  -6  -3  429.26   15.10
   1  -6  -3  155.88    6.20
   1  -6  -3  151.38    5.50
   1  -6  -3  146.39    6.70
   0  -6  -3  106.29    5.40
   0  -6  -3  101.49    4.80
   0   6   3  105.39    4.00
  -1  -6  -3   33.10    2.90
  -1  -6  -3   31.00    2.40
   1   6   3   32.70    1.50
  -2  -6  -3  110.59    6.00
  -2  -6  -3  111.79    5.40
  -3  -6  -3   10.10    2.10
  -3  -6  -3   12.90    2.20
   3   6   3   10.40    1.60
  -4  -6  -3   33.50    3.40
   4   6   3   32.90    2.60
  -5  -6  -3  119.69    6.90
   5   6   3  117.19    5.90
  -6  -6  -3   44.50    4.20
   6   6   3   36.50    3.20
  -7  -6  -3   10.00    2.50
   7   6   3    7.90    1.80
   9  -7  -3   65.39    4.70
   9  -7  -3   64.79    5.00
   9  -7  -3   67.19    4.60
   8  -7  -3   24.60    2.60
   8  -7  -3   20.40    3.00
   8  -7  -3   24.40    2.80
   7  -7  -3  111.19    5.90
   7  -7  -3  115.49    6.20
   7  -7  -3  112.89    6.30
   6  -7  -3  380.36   13.80
   6  -7  -3  378.86   12.60
   6  -7  -3  401.56   14.20
   6  -7  -3  374.56   13.60
   5  -7  -3  196.38    8.00
   5  -7  -3  192.48    8.10
   5  -7  -3  190.48    7.90
   5  -7  -3  200.58    7.60
   4  -7  -3    1.20    0.90
   4  -7  -3    2.20    0.90
   4  -7  -3    0.80    0.60
   4  -7  -3    1.50    0.80
   3  -7  -3  373.26   12.60
   3  -7  -3  380.26   13.30
   3  -7  -3  359.66   12.80
   2  -7  -3  316.07   11.30
   2  -7  -3  318.67   11.90
   2  -7  -3  320.97   10.80
   1  -7  -3   54.69    3.30
   1  -7  -3   60.19    4.00
   0  -7  -3  332.77   11.50
   0  -7  -3  330.67   12.50
   0   7   3  298.87   10.30
  -1  -7  -3  321.67   11.70
  -1  -7  -3  327.77   13.20
  -2  -7  -3   69.39    4.90
  -2  -7  -3   77.09    4.40
  -3  -7  -3   14.40    2.50
  -3  -7  -3   19.60    3.20
  -4  -7  -3  113.09    6.70
  -4  -7  -3  109.89    6.10
  -5  -7  -3   97.39    6.30
   5   7   3   92.49    5.20
  -6  -7  -3   24.00    3.80
   6   7   3   23.70    2.70
   9  -8  -3   25.80    3.70
   9  -8  -3   17.90    2.90
   9  -8  -3   29.70    3.10
   8  -8  -3   58.59    4.50
   8  -8  -3   50.39    3.90
   8  -8  -3   56.59    4.20
   7  -8  -3  255.37    9.20
   7  -8  -3  270.37   10.70
   7  -8  -3  276.47   11.20
   6  -8  -3  152.88    6.20
   6  -8  -3  147.19    6.70
   6  -8  -3  140.49    6.80
   6  -8  -3  154.38    7.20
   5  -8  -3   46.40    3.30
   5  -8  -3   49.60    3.90
   5  -8  -3   54.29    3.50
   5  -8  -3   53.89    3.40
   4  -8  -3  204.58    8.20
   4  -8  -3  189.08    7.80
   4  -8  -3  180.68    8.20
   4  -8  -3  203.98    8.00
   3  -8  -3  455.15   15.20
   3  -8  -3  460.85   16.20
   3  -8  -3  457.25   15.50
   2  -8  -3   45.50    3.20
   2  -8  -3   51.09    3.70
   2  -8  -3   49.50    2.80
   1  -8  -3  365.96   12.90
   0  -8  -3  359.86   14.20
   0  -8  -3  373.26   13.10
  -1  -8  -3  340.97   13.50
  -1  -8  -3  325.97   12.20
  -2  -8  -3   69.09    4.30
  -2  -8  -3   60.09    4.70
  -3  -8  -3  265.27   11.90
  -3  -8  -3  274.57   11.10
  -4  -8  -3  199.58    9.90
  -4  -8  -3  190.08    9.00
  -5  -8  -3   54.89    4.60
  -5  -8  -3   60.29    5.20
   8  -9  -3   87.39    5.80
   8  -9  -3   79.89    5.00
   7  -9  -3   90.69    5.40
   7  -9  -3   86.49    4.20
   7  -9  -3   89.19    5.60
   7  -9  -3   97.99    5.20
   6  -9  -3   16.90    2.30
   6  -9  -3   13.60    2.30
   6  -9  -3   15.50    2.40
   6  -9  -3   14.30    2.10
   5  -9  -3  204.68    8.50
   5  -9  -3  204.38    8.30
   5  -9  -3  200.28    8.40
   5  -9  -3  198.78    8.70
   4  -9  -3  261.87    9.90
   4  -9  -3  258.07   10.00
   4  -9  -3  257.97   10.10
   4  -9  -3  258.97   10.40
   3  -9  -3  152.78    7.90
   3  -9  -3  156.58    6.60
   3  -9  -3  167.68    7.00
   2  -9  -3   59.99    3.30
   2  -9  -3   62.49    3.90
   2  -9  -3   71.19    4.60
   1  -9  -3  230.58    9.10
   1  -9  -3  226.48   10.10
   0  -9  -3  120.79    6.90
   0  -9  -3  126.19    6.10
  -1  -9  -3   82.99    4.70
  -1  -9  -3   70.19    5.10
  -2  -9  -3  198.68    8.90
  -2  -9  -3  215.08   10.20
  -3  -9  -3  289.07   11.80
  -3  -9  -3  287.97   13.00
  -4  -9  -3  168.08    8.20
  -4  -9  -3  154.38    9.00
  -5  -9  -3   43.60    4.70
  -5  -9  -3   47.90    4.30
   8 -10  -3   41.70    3.60
   8 -10  -3   36.70    3.60
   7 -10  -3   -0.10    1.20
   7 -10  -3   -2.90    1.30
   7 -10  -3    1.10    1.50
   7 -10  -3    1.70    1.10
   6 -10  -3   29.00    3.30
   6 -10  -3   31.00    2.80
   6 -10  -3   31.20    2.90
   6 -10  -3   32.40    3.00
   5 -10  -3   73.99    4.40
   5 -10  -3   71.29    4.70
   5 -10  -3   73.19    4.70
   5 -10  -3   74.29    4.40
   4 -10  -3   45.40    3.20
   4 -10  -3   47.80    3.80
   4 -10  -3   49.60    3.40
   4 -10  -3   48.70    3.70
   3 -10  -3    0.70    0.80
   3 -10  -3   -0.10    1.00
   3 -10  -3    2.70    1.50
   2 -10  -3  174.58    8.60
   2 -10  -3  172.38    7.60
   2 -10  -3  172.58    6.90
   1 -10  -3  125.89    7.20
   0 -10  -3  137.39    6.60
   0 -10  -3  132.29    7.50
  -1 -10  -3   43.30    4.30
  -1 -10  -3   40.60    3.50
  -2 -10  -3  118.49    7.50
  -2 -10  -3  129.89    6.70
  -3 -10  -3   80.99    5.20
  -3 -10  -3   68.09    6.70
   7 -11  -3   11.50    2.20
   7 -11  -3   11.50    2.20
   7 -11  -3   14.90    3.70
   6 -11  -3    3.60    1.70
   6 -11  -3    3.60    1.80
   6 -11  -3    3.30    1.40
   6 -11  -3    2.70    1.40
   5 -11  -3    8.60    2.20
   5 -11  -3   12.20    2.10
   5 -11  -3   12.10    2.20
   5 -11  -3   10.80    2.30
   4 -11  -3   41.50    3.20
   4 -11  -3   34.40    3.00
   4 -11  -3   35.70    3.80
   4 -11  -3   38.40    3.60
   3 -11  -3   91.89    5.90
   3 -11  -3   93.79    5.10
   3 -11  -3   92.49    4.80
   2 -11  -3   11.20    2.00
   2 -11  -3   12.70    2.50
   1 -11  -3   42.20    4.20
   1 -11  -3   43.30    3.40
   0 -11  -3    6.00    1.80
   0 -11  -3    4.90    1.50
  -1 -11  -3   19.20    4.30
  -1 -11  -3   19.40    2.90
  -2 -11  -3   11.60    2.80
  -2 -11  -3   13.50    2.60
   5 -12  -3   85.69    4.90
   5 -12  -3   78.39    4.90
   5 -12  -3   82.49    5.40
   5 -12  -3   87.79    5.60
   4 -12  -3   27.70    3.00
   4 -12  -3   30.60    3.70
   4 -12  -3   27.60    2.80
   4 -12  -3   31.40    3.50
   3 -12  -3   -0.60    1.40
   3 -12  -3   -0.40    1.10
   2 -12  -3   45.20    4.40
   2 -12  -3   46.50    3.70
   1 -12  -3   81.99    5.00
   0 -12  -3   25.00    4.00
   0 -12  -3   28.50    3.10
   1 -15   4   21.10    3.80
   1 -15   4   16.20    2.40
   2 -15   4    2.80    1.30
   2 -15   4    1.80    1.60
  -2 -14   4   15.10    2.10
  -2 -14   4   13.60    2.90
  -1 -14   4  115.29    7.60
  -1 -14   4  120.39    5.10
  -1 -14   4  119.59    5.10
   0 -14   4  106.39    7.40
   0 -14   4  112.69    5.70
   1 -14   4   16.30    3.00
   1 -14   4   19.10    2.20
   2 -14   4  142.69    7.90
   2 -14   4  140.59    6.50
   3 -14   4  146.09    6.90
   3 -14   4  134.09    7.60
   4 -14   4   51.59    5.10
   4 -14   4   42.90    4.10
   4 -14   4   50.99    3.80
   5 -14   4    9.60    2.10
   5 -14   4   23.00    3.50
   5 -14   4   15.50    3.10
  -4 -13   4   97.89    7.10
  -4 -13   4  110.99    5.80
  -3 -13   4   45.30    3.30
  -3 -13   4   41.20    4.90
  -2 -13   4  256.47    9.30
  -2 -13   4  246.88   11.90
  -2 -13   4  241.88    8.40
  -1 -13   4  151.78    6.00
  -1 -13   4  151.78    8.40
  -1 -13   4  156.78    6.00
   0 -13   4   70.69    5.30
   0 -13   4   76.29    3.90
   1 -13   4  138.99    7.50
   1 -13   4  128.79    6.00
   2 -13   4  272.07   11.60
   2 -13   4  259.17   10.20
   3 -13   4   74.09    5.10
   3 -13   4   74.29    4.50
   4 -13   4    8.90    2.00
   4 -13   4   10.30    2.10
   4 -13   4    4.30    1.90
   5 -13   4  225.18    9.80
   5 -13   4  218.98    9.60
   5 -13   4  218.18   10.40
   6 -13   4  115.29    6.50
   6 -13   4  116.79    6.30
   6 -13   4  126.79    7.40
  -5 -12   4   72.29    5.90
  -4 -12   4    0.80    1.60
  -3 -12   4   97.69    6.60
  -3 -12   4   94.39    4.90
  -2 -12   4  159.18    8.50
  -2 -12   4  157.88    6.50
  -2 -12   4  159.68    5.80
  -1 -12   4   42.00    2.50
  -1 -12   4   39.60    3.70
  -1 -12   4   44.40    2.60
   0 -12   4   46.70    4.10
   0 -12   4   49.40    3.00
   1 -12   4  274.37   11.30
   1 -12   4  246.68    9.60
   2 -12   4  223.48    9.80
   2 -12   4  211.78    8.70
   3 -12   4   19.50    2.90
   3 -12   4   21.20    2.30
   4 -12   4   82.39    5.10
   4 -12   4   85.79    5.10
   4 -12   4   92.79    5.60
   5 -12   4  162.48    7.70
   5 -12   4  158.28    7.60
   5 -12   4  158.08    8.10
   6 -12   4   52.69    3.90
   6 -12   4   51.89    4.60
   6 -12   4   50.09    3.70
   7 -12   4   39.10    3.60
   7 -12   4   45.50    3.70
   7 -12   4   48.70    4.70
  -6 -11   4   62.19    5.90
  -5 -11   4    2.40    1.60
  -4 -11   4   17.40    3.20
  -3 -11   4   78.79    5.40
  -3 -11   4   74.19    3.00
  -2 -11   4   63.99    3.40
  -2 -11   4   64.79    3.00
  -2 -11   4   59.89    4.70
  -1 -11   4    1.50    1.20
  -1 -11   4    1.00    0.60
  -1 -11   4    0.50    0.60
   0 -11   4   84.79    5.30
   0 -11   4   75.19    3.20
   0 -11   4   88.79    4.20
   1 -11   4  157.98    6.50
   1 -11   4  151.48    7.50
   2 -11   4    2.80    1.30
   2 -11   4    3.60    1.40
   3 -11   4   40.10    3.30
   3 -11   4   35.10    2.90
   4 -11   4  148.89    7.00
   4 -11   4  149.88    7.00
   4 -11   4  159.38    7.50
   5 -11   4   12.80    2.60
   5 -11   4   13.90    2.60
   5 -11   4   11.30    2.10
   6 -11   4   14.20    2.50
   6 -11   4   10.60    2.20
   6 -11   4   10.40    2.50
   7 -11   4  107.89    6.10
   7 -11   4  108.09    6.70
   7 -11   4   93.99    5.20
   8 -11   4   54.59    4.30
   8 -11   4   63.79    5.30
  -7 -10   4   37.40    4.40
  -6 -10   4   45.00    4.40
  -5 -10   4   45.60    4.30
  -4 -10   4   12.60    2.80
  -3 -10   4   87.29    3.60
  -3 -10   4   91.19    5.60
  -2 -10   4   91.69    5.50
  -2 -10   4   91.29    3.80
  -1 -10   4   71.19    4.60
  -1 -10   4   71.09    3.40
  -1 -10   4   70.79    4.40
   0 -10   4   32.90    3.50
   0 -10   4   34.60    2.40
   1 -10   4  104.29    4.90
   1 -10   4  112.29    5.70
   2 -10   4   65.59    3.80
   2 -10   4   63.29    4.00
   3 -10   4  108.69    5.50
   4 -10   4   83.49    4.70
   4 -10   4   82.89    4.90
   4 -10   4   86.99    4.70
   5 -10   4   71.39    4.70
   5 -10   4   71.79    4.30
   5 -10   4   62.49    3.90
   6 -10   4   58.69    3.50
   6 -10   4   60.49    4.60
   6 -10   4   47.30    3.80
   7 -10   4    5.80    1.30
   7 -10   4    6.80    1.90
   7 -10   4    7.00    1.70
   8 -10   4   19.00    2.90
   8 -10   4   16.40    2.20
   7   9  -4   80.79    5.10
  -7  -9   4   77.39    5.70
   6   9  -4  114.19    6.00
  -6  -9   4  109.19    6.70
  -5  -9   4   34.90    3.50
  -4  -9   4  125.79    6.80
  -4  -9   4  123.39    4.30
  -3  -9   4  502.25   15.40
  -3  -9   4  493.65   17.90
  -2  -9   4  236.08    9.90
  -2  -9   4  232.28    8.00
  -1  -9   4   68.79    4.30
  -1  -9   4   72.29    3.30
  -1  -9   4   63.49    3.00
   0  -9   4  386.76   12.60
   0  -9   4  378.36   13.60
   0  -9   4  362.66   11.50
   1  -9   4  302.57   11.30
   1  -9   4  299.77   10.60
   2  -9   4   89.59    4.50
   2  -9   4   92.89    4.80
   3  -9   4   62.69    3.70
   3  -9   4   65.69    3.80
   4  -9   4  387.06   13.80
   5  -9   4   41.70    3.50
   5  -9   4   50.39    3.50
   6  -9   4    4.90    1.50
   6  -9   4    6.40    1.90
   6  -9   4    6.70    1.40
   7  -9   4  110.19    5.00
   7  -9   4  116.09    6.70
   7  -9   4  115.99    6.10
   8  -9   4   42.70    4.00
   8  -9   4   43.40    3.60
   8  -9   4   41.70    2.70
   9  -9   4   12.00    2.10
   9  -9   4    8.70    2.20
   8   8  -4  133.49    7.10
  -8  -8   4  132.59    7.30
   7   8  -4  252.07   10.50
  -7  -8   4  251.27   11.10
   6   8  -4   89.79    5.00
  -6  -8   4   90.79    5.70
   5   8  -4  158.98    6.90
  -5  -8   4  151.48    7.60
  -4  -8   4  792.72   23.30
  -4  -8   4  762.22   25.80
  -3  -8   4  151.18    7.10
  -3  -8   4  156.38    5.50
  -2  -8   4   36.20    2.10
  -2  -8   4   36.30    2.90
  -1  -8   4  626.14   19.50
  -1  -8   4  632.64   21.00
  -1  -8   4  663.63   19.90
   0  -8   4 1481.15   45.10
   0  -8   4 1483.25   44.20
   1  -8   4  439.16   14.50
   2  -8   4  177.58    7.00
   3  -8   4  520.25   17.20
   4  -8   4  220.78    8.60
   4  -8   4  208.68    8.60
  -5   8  -4  121.49    4.70
   5  -8   4  121.09    8.70
   5  -8   4  124.49    5.90
   6  -8   4  227.48    9.10
   6  -8   4  206.18    9.40
   7  -8   4  248.48   10.10
   7  -8   4  244.28   10.80
   8  -8   4   65.49    5.00
   8  -8   4   68.89    3.40
   8  -8   4   72.39    4.60
   9  -8   4   10.20    2.50
   9  -8   4   11.00    2.20
   8   7  -4  176.68    8.50
  -8  -7   4  192.98    8.70
   7   7  -4   71.89    4.60
  -7  -7   4   76.89    5.00
   6   7  -4  103.39    5.20
  -6  -7   4   95.69    5.50
  -6  -7   4   94.39    3.60
  -6  -7   4   84.59    3.60
   5   7  -4  491.55   17.00
  -5  -7   4  506.55   17.70
  -5  -7   4  513.45   15.50
   4   7  -4  330.17   11.40
  -4  -7   4  317.87   12.00
  -4  -7   4  307.37   10.80
  -3  -7   4   91.19    3.60
  -3  -7   4   90.19    4.80
  -2  -7   4  284.97    9.60
  -2  -7   4  274.67   10.30
  -1  -7   4 1679.23   51.49
  -1  -7   4 1716.03   50.49
  -1  -7   4 1754.32   50.59
   0  -7   4  337.47   11.20
   1  -7   4  263.67    9.20
   2  -7   4  581.84   18.60
   3  -7   4  689.73   21.70
   3  -7   4  667.93   21.60
  -4   7  -4  254.77    8.50
   4  -7   4  273.67   10.00
   4  -7   4  260.57    9.80
   5  -7   4  165.18    7.40
   5  -7   4  168.68    7.60
   6  -7   4  404.96   15.10
   6  -7   4  416.66   14.70
   7  -7   4  229.78    9.30
   7  -7   4  209.68    9.60
   8  -7   4    6.90    1.90
   8  -7   4   11.90    2.10
   9  -7   4   96.49    5.60
   9  -7   4  102.49    8.00
   9   6  -4   72.59    5.10
  -9  -6   4   75.89    4.80
   8   6  -4   82.49    5.00
  -8  -6   4   79.79    4.90
   7   6  -4    7.00    1.60
  -7  -6   4    6.60    1.70
   6   6  -4  338.47   12.20
  -6  -6   4  328.47   12.50
   5   6  -4  523.75   17.40
  -5  -6   4  521.65   17.80
   4   6  -4   24.90    2.00
  -4  -6   4   28.50    2.40
  -4  -6   4   24.90    1.50
   3   6  -4  219.78    8.00
  -3  -6   4  229.08    7.50
  -3  -6   4  217.68    8.50
  -2  -6   4  547.35   17.10
  -2  -6   4  545.95   17.20
  -2  -6   4  577.54   18.10
  -1  -6   4  432.36   13.20
   0  -6   4   11.70    1.10
   1  -6   4  785.82   24.10
   2  -6   4  796.82   24.70
  -3   6  -4  479.95   14.40
   3  -6   4  476.75   15.70
   3  -6   4  484.45   15.80
  -4   6  -4   63.39    3.00
   4  -6   4   76.49    4.10
   4  -6   4   82.79    4.00
   5  -6   4  421.36   14.50
   5  -6   4  421.56   14.90
   6  -6   4  524.15   19.90
   6  -6   4  548.25   18.10
   7  -6   4    1.90    1.00
   7  -6   4    3.50    1.30
   8  -6   4  115.59    6.60
   8  -6   4  110.89    5.70
   9  -6   4  182.08    9.10
   9  -6   4  179.58    8.20
   9   5  -4   46.20    3.90
  -9  -5   4   43.00    3.30
   8   5  -4   67.29    4.40
  -8  -5   4   65.39    4.10
   7   5  -4   56.39    3.70
  -7  -5   4   56.69    3.70
   6   5  -4  103.69    5.20
  -6  -5   4   95.59    4.90
   5   5  -4  195.38    7.80
  -5  -5   4  216.58    8.20
   4   5  -4  246.88    8.70
  -4  -5   4  244.08    9.00
  -4  -5   4  235.48    7.90
   3   5  -4   82.39    3.60
  -3  -5   4   77.29    3.80
   2   5  -4  317.97   10.20
  -2  -5   4  315.97   10.00
  -2  -5   4  299.77   10.00
  -1  -5   4   43.60    1.90
  -1  -5   4   40.70    2.10
   0   5  -4  466.55   14.50
   1  -5   4  150.18    5.60
   2  -5   4  725.03   22.60
   2  -5   4  736.43   22.40
  -3   5  -4  284.57    8.90
   3  -5   4  270.27    9.80
   3  -5   4  283.67    9.80
  -4   5  -4  306.17   10.60
   4  -5   4  338.37   11.70
   4  -5   4  336.07   11.40
   5  -5   4  198.28    7.60
   5  -5   4  180.68    7.90
   6  -5   4   18.50    2.60
   6  -5   4   16.20    1.80
   7  -5   4   38.80    3.50
   7  -5   4   40.50    3.00
   8  -5   4  107.29    5.50
   8  -5   4  107.79    6.30
   9  -5   4   53.79    3.70
   9  -5   4   46.10    4.10
  10   4  -4    3.00    1.40
   9   4  -4  110.59    6.10
  -9  -4   4  100.49    4.70
   8   4  -4   82.09    4.70
  -8  -4   4   74.79    4.10
   7   4  -4  103.59    5.50
  -7  -4   4  116.09    5.10
   6   4  -4  441.76   15.20
  -6  -4   4  443.36   14.80
   5   4  -4  361.16   12.50
  -5  -4   4  375.26   12.50
   4   4  -4   93.79    4.10
  -4  -4   4   89.09    3.60
  -4  -4   4   94.89    4.20
   3   4  -4  162.78    5.90
  -3  -4   4  160.78    6.00
   2   4  -4  592.44   18.60
   2   4  -4  586.44   18.70
  -2  -4   4  641.04   18.80
  -2  -4   4  642.34   18.80
   1   4  -4 1113.79   31.20
  -1  -4   4 1058.49   31.50
  -1  -4   4 1031.00   31.10
  -1  -4   4 1046.60   31.30
   0   4  -4  166.48    5.90
   0   4  -4  175.18    5.20
   0  -4   4  163.28    5.90
  -1   4  -4  445.16   14.30
   2  -4   4  443.76   14.00
   2  -4   4  456.85   14.30
   2  -4   4  442.76   14.20
  -3   4  -4  273.07    8.50
   3  -4   4  251.37    9.00
   3  -4   4  252.17    9.10
   4  -4   4   37.30    2.40
   4  -4   4   39.40    2.60
   5  -4   4  216.78    8.60
   5  -4   4  216.08    8.20
   6  -4   4  198.88    8.70
   6  -4   4  216.58    8.20
   7  -4   4   19.40    2.70
   7  -4   4   21.70    2.10
   8  -4   4   44.90    3.20
   8  -4   4   47.50    3.90
   9  -4   4   62.49    3.90
   9  -4   4   61.89    4.80
  10   3  -4  129.59    8.10
   9   3  -4  233.58   10.10
   8   3  -4   34.70    2.90
  -8  -3   4   34.40    2.30
   7   3  -4   73.89    4.90
  -7  -3   4   73.49    3.60
   6   3  -4  550.34   17.80
  -6  -3   4  525.05   17.10
   5   3  -4  220.18    8.10
  -5  -3   4  220.58    7.80
   4   3  -4  463.55   14.70
   4   3  -4  460.75   15.00
  -4  -3   4  452.35   14.50
   3   3  -4 1085.29   31.90
   3   3  -4 1059.79   32.80
   2   3  -4 1435.96   42.00
   2   3  -4 1439.86   41.70
  -2  -3   4 1406.66   41.90
  -2  -3   4 1425.16   41.70
   1   3  -4   49.30    2.20
  -1  -3   4   56.09    2.30
  -1  -3   4   57.99    2.20
   0   3  -4  116.89    3.60
   0  -3   4  100.49    3.90
   0  -3   4   95.69    3.40
  -1   3  -4 2804.82   82.69
   1  -3   4 2897.51   82.59
   2  -3   4  590.64   18.20
   2  -3   4  586.14   18.10
   2  -3   4  594.64   18.30
   3  -3   4  203.88    7.40
   3  -3   4  199.48    7.50
   3  -3   4  206.18    7.30
   4  -3   4  274.97    9.50
   4  -3   4  273.37    9.90
   5  -3   4  522.25   16.80
   5  -3   4  512.35   17.40
   6  -3   4    8.20    1.60
   6  -3   4   11.10    1.80
   7  -3   4   18.80    1.90
   7  -3   4   21.80    2.50
   8  -3   4  208.28    8.40
   8  -3   4  213.28    9.50
   9  -3   4   88.39    4.80
   9  -3   4   89.09    5.80
  10   2  -4  126.49    6.90
   9   2  -4  117.49    6.30
   8   2  -4   49.80    3.60
   7   2  -4  383.16   13.70
  -7  -2   4  381.36   12.10
   6   2  -4  459.65   15.70
  -6  -2   4  474.55   14.60
   5   2  -4  140.89    5.70
   5   2  -4  140.29    6.00
  -5  -2   4  142.69    5.10
   4   2  -4  604.74   18.70
   4   2  -4  612.94   19.20
  -4  -2   4  591.64   18.20
   3   2  -4 1865.21   54.19
   3   2  -4 1848.42   53.79
  -3  -2   4 1813.02   53.79
   2   2  -4  797.42   22.90
   2   2  -4  788.52   23.30
  -2  -2   4  759.22   23.30
  -2  -2   4  753.12   22.90
   1   2  -4  399.16   11.80
  -1  -2   4  378.96   11.70
  -1  -2   4  364.86   11.70
  -1  -2   4  379.16   11.30
   0   2  -4 3618.34  158.08
   0  -2   4 3395.46  154.48
  -1   2  -4 3240.08   93.69
  -2   2  -4  534.35   16.40
  -2   2  -4  570.14   16.50
  -2   2  -4  527.25   16.30
   2  -2   4  532.55   16.60
   2  -2   4  492.55   16.40
   2  -2   4  542.85   16.50
  -3   2  -4  614.84   18.30
   3  -2   4  580.04   18.50
   3  -2   4  580.04   18.30
  -4   2  -4  876.41   25.80
   4  -2   4  851.11   25.90
   4  -2   4  821.62   26.40
  -5   2  -4  357.36   12.10
   5  -2   4  365.06   12.20
   5  -2   4  379.46   13.00
  -6   2  -4  233.08    8.30
   6  -2   4  236.58    9.40
   6  -2   4  234.78    8.60
  -7   2  -4  240.38    8.40
   7  -2   4  228.28    8.70
   7  -2   4  231.18    9.70
   8  -2   4  202.68    9.10
   8  -2   4  193.88    7.90
   9  -2   4   44.10    3.10
   9  -2   4   47.50    4.00
  10   1  -4   49.90    4.10
   9   1  -4   30.40    2.90
   8   1  -4   48.20    3.50
   7   1  -4  264.57   10.20
   6   1  -4   41.00    2.90
   6   1  -4   36.70    2.60
   5   1  -4  112.69    4.70
   5   1  -4  113.79    5.10
  -5  -1   4   99.79    3.70
   4   1  -4 1220.48   36.20
   4   1  -4 1200.78   36.60
  -4  -1   4 1213.58   35.20
   3   1  -4  993.50   30.00
   3   1  -4  998.80   29.40
  -3  -1   4  989.40   29.10
  -3  -1   4  997.80   29.50
  -3  -1   4  989.00   29.50
   2   1  -4  400.56   12.90
   2   1  -4  400.76   12.30
  -2  -1   4  410.16   12.50
  -2  -1   4  416.56   13.00
  -2  -1   4  428.36   12.40
   1   1  -4 1175.88   33.50
   1   1  -4 1183.88   33.70
  -1  -1   4 1121.99   33.60
  -1  -1   4 1083.99   33.50
   0   1  -4 2715.13  135.79
   0  -1   4 2504.75  134.59
  -1   1  -4   35.40    1.70
  -1   1  -4   37.30    2.00
  -1   1  -4   38.10    2.10
   1  -1   4   52.49    2.10
   1  -1   4   52.59    2.40
  -2   1  -4 1330.87   40.40
  -2   1  -4 1362.06   40.30
   2  -1   4 1413.76   40.50
   2  -1   4 1377.76   40.90
   2  -1   4 1391.76   40.40
  -3   1  -4 1027.20   31.20
  -3   1  -4 1062.49   31.60
   3  -1   4 1035.20   31.30
   3  -1   4 1073.89   31.60
  -4   1  -4  760.62   23.20
   4  -1   4  741.73   23.50
   4  -1   4  748.03   22.90
  -5   1  -4   82.69    3.80
   5  -1   4   72.99    3.40
   5  -1   4   73.09    4.00
  -6   1  -4  224.38    8.10
   6  -1   4  213.08    7.80
   6  -1   4  205.18    8.70
  -7   1  -4  153.88    6.20
   7  -1   4  156.68    6.20
   7  -1   4  158.58    7.40
  -8   1  -4   62.69    3.50
   8  -1   4   74.79    4.80
   8  -1   4   70.59    3.70
   9  -1   4  113.59    5.40
   9  -1   4  121.69    6.80
  10   0  -4    1.20    1.30
   9   0  -4   32.20    3.00
   8   0  -4   56.39    3.90
   7   0  -4  134.59    6.20
   7   0  -4  129.19    6.30
   6   0  -4   91.39    4.80
   6   0  -4   91.19    4.50
   5   0  -4  594.34   19.20
   5   0  -4  587.54   18.80
   4   0  -4  296.57   10.50
   4   0  -4  314.07   10.60
  -4   0   4  306.77    9.30
   3   0  -4   75.99    3.00
  -3   0   4   69.39    2.70
   2   0  -4  274.87    8.70
   2   0  -4  270.67    9.20
   2   0  -4  274.07    8.50
  -2   0   4  282.27    8.80
  -2   0   4  281.27    8.50
   1   0  -4 1145.59   32.90
   1   0  -4 1106.59   32.70
  -1   0   4 1114.79   32.80
  -1   0   4 1068.49   32.70
   0   0  -4   74.79    3.00
   0   0  -4   77.59    3.10
   0   0   4   59.39    2.80
   0   0   4   64.59    3.00
  -1   0  -4  188.38    6.60
  -1   0  -4  182.38    6.40
  -1   0  -4  179.08    5.90
   1   0   4  184.18    5.90
   1   0   4  184.58    6.70
   1   0   4  184.58    6.10
  -2   0  -4  950.60   29.60
  -2   0  -4  931.61   29.10
   2   0   4 1029.60   29.10
   2   0   4 1001.40   29.00
  -3   0  -4  486.85   15.30
  -3   0  -4  530.15   16.30
   3   0   4  497.85   15.80
   3   0   4  491.05   15.40
  -4   0  -4  195.28    7.20
  -4   0  -4  209.98    7.70
   4   0   4  203.48    7.60
  -5   0  -4   95.79    4.40
   5   0   4   85.29    4.40
   5   0   4   86.89    3.70
  -6   0  -4  156.58    6.50
   6   0   4  145.99    5.70
   6   0   4  158.98    6.90
  -7   0  -4   21.10    2.10
   7   0   4   26.10    2.60
   7   0   4   22.80    1.80
  -8   0  -4   28.70    2.40
   8   0   4   32.20    3.10
   8   0   4   22.50    2.00
  -9   0  -4   60.99    3.60
   9   0   4   57.49    5.70
   9   0   4   55.19    3.30
  10  -1  -4   32.30    3.40
   9  -1  -4    9.50    1.90
   8  -1  -4   98.59    5.40
   8  -1  -4   99.99    5.60
   7  -1  -4   55.89    3.80
   7  -1  -4   56.19    3.40
   7  -1  -4   62.49    3.80
   6  -1  -4   10.10    1.90
   6  -1  -4    7.00    1.40
   6  -1  -4    6.20    1.20
   5  -1  -4   17.20    1.70
   5  -1  -4   17.20    1.70
   5  -1  -4   16.70    1.50
   4  -1  -4  108.19    4.50
  -4   1   4   85.49    3.20
   3  -1  -4   70.19    2.70
   3  -1  -4   68.99    2.90
   3  -1  -4   70.39    3.30
  -3   1   4   69.19    2.80
  -3   1   4   67.09    2.90
   2  -1  -4   10.30    1.00
  -2   1   4    6.10    1.00
  -2   1   4    7.10    0.80
  -2   1   4    5.90    0.90
   1  -1  -4   70.29    2.90
   1  -1  -4   66.59    2.90
  -1   1   4   51.59    2.60
  -1   1   4   56.69    2.80
   0  -1  -4  203.78    7.10
   0  -1  -4  200.78    7.20
   0  -1  -4  195.38    6.30
   0   1   4  217.88    7.40
  -1  -1  -4  745.83   22.60
  -1  -1  -4  711.43   22.70
  -1  -1  -4  713.53   21.60
   1   1   4  740.03   21.60
  -2  -1  -4  410.46   13.30
  -2  -1  -4  384.26   12.50
   2   1   4  393.46   12.20
   2   1   4  400.76   12.50
  -3  -1  -4  234.08    8.70
   3   1   4  236.78    8.20
   3   1   4  235.48    7.60
  -4  -1  -4  236.88    9.00
   4   1   4  239.48    7.80
   4   1   4  239.58    8.70
  -5  -1  -4  433.26   14.90
  -5  -1  -4  430.56   13.80
   5   1   4  432.36   14.80
  -6  -1  -4   22.00    2.30
   6   1   4   26.10    1.60
   6   1   4   21.70    3.00
  -7  -1  -4   12.10    2.00
   7   1   4   20.80    2.80
   7   1   4   14.90    1.40
  -8  -1  -4   40.40    3.10
   8   1   4   38.50    2.30
   8   1   4   35.70    3.40
  -9  -1  -4   13.20    2.10
   9   1   4   11.60    2.50
  10  -2  -4   16.50    2.90
   9  -2  -4   71.49    4.80
   8  -2  -4  229.18    9.80
   8  -2  -4  233.98    9.30
   8  -2  -4  230.98    9.70
   7  -2  -4   86.49    4.90
   7  -2  -4   85.99    4.70
   7  -2  -4   84.99    4.50
   6  -2  -4  260.27    9.90
   6  -2  -4  263.67    9.60
   6  -2  -4  257.27    9.80
   5  -2  -4  469.15   15.70
   5  -2  -4  476.95   15.40
   5  -2  -4  453.05   15.20
   4  -2  -4  582.54   18.40
   4  -2  -4  552.04   17.00
   4  -2  -4  567.74   18.00
   4  -2  -4  581.04   18.00
  -4   2   4  571.34   17.10
   3  -2  -4   20.90    1.70
   3  -2  -4   20.10    1.40
   3  -2  -4   19.50    1.30
  -3   2   4   18.90    1.30
   2  -2  -4  745.83   21.70
   2  -2  -4  728.83   22.20
  -2   2   4  717.13   22.30
   1  -2  -4 1239.38   40.20
   1  -2  -4 1495.95   42.10
  -1   2   4 1305.17   39.10
  -1   2   4 1308.27   39.80
   0  -2  -4  355.66   11.90
   0  -2  -4  359.36   11.70
   0  -2  -4  352.86   10.90
  -1  -2  -4   15.60    1.40
  -1  -2  -4   12.50    1.00
  -1  -2  -4   15.10    1.60
   1   2   4   13.60    1.00
  -2  -2  -4  448.36   14.90
   2   2   4  449.95   13.30
   2   2   4  424.96   14.20
  -3  -2  -4  488.75   16.40
   3   2   4  484.45   14.50
   3   2   4  480.85   15.50
  -4  -2  -4   98.79    4.90
   4   2   4   93.89    4.40
   4   2   4   89.19    3.30
  -5  -2  -4    5.50    1.40
   5   2   4    9.30    1.60
   5   2   4    9.20    0.80
  -6  -2  -4  269.87   10.50
   6   2   4  264.87    8.50
   6   2   4  262.07   10.30
  -7  -2  -4   63.09    4.20
   7   2   4   61.09    4.10
  -8  -2  -4    0.90    1.20
   8   2   4    1.70    1.00
  10  -3  -4   70.29    5.00
   9  -3  -4  218.28    9.90
   9  -3  -4  230.08    9.60
   9  -3  -4  243.08   10.30
   8  -3  -4  103.89    5.70
   8  -3  -4   98.99    5.30
   8  -3  -4  105.09    5.80
   7  -3  -4   13.00    2.00
   7  -3  -4   11.20    1.90
   7  -3  -4   13.70    2.20
   6  -3  -4  403.96   13.90
   6  -3  -4  386.26   13.60
   6  -3  -4  392.16   13.90
   5  -3  -4  620.74   20.30
   5  -3  -4  634.24   20.10
   5  -3  -4  627.14   20.10
   4  -3  -4  279.97   10.10
   4  -3  -4  286.87    9.90
   4  -3  -4  276.17    9.20
   4  -3  -4  290.37    9.90
  -4   3   4  293.77    9.20
   3  -3  -4  166.58    6.00
   3  -3  -4  167.78    6.50
   3  -3  -4  167.38    6.00
   3  -3  -4  161.28    6.10
  -3   3   4  159.58    6.00
   2  -3  -4  911.91   28.00
   2  -3  -4  922.31   27.90
   1  -3  -4  583.34   18.10
   1  -3  -4  583.04   18.30
  -1   3   4  552.14   17.40
   0  -3  -4  336.47   11.30
   0  -3  -4  327.87   10.50
   0  -3  -4  337.87   11.60
  -1  -3  -4  835.72   25.60
  -1  -3  -4  852.81   26.10
   1   3   4  819.82   24.20
   1   3   4  789.92   24.70
  -2  -3  -4 1375.66   42.60
  -2  -3  -4 1427.16   43.20
   2   3   4 1423.06   40.90
   2   3   4 1401.06   41.80
   2   3   4 1436.56   41.00
  -3  -3  -4   97.69    5.00
   3   3   4   90.19    4.10
  -4  -3  -4  258.37   10.30
   4   3   4  258.87    9.50
  -5  -3  -4  699.63   23.90
   5   3   4  733.13   23.20
  -6  -3  -4  270.07   10.80
   6   3   4  262.37   10.40
  -7  -3  -4   23.40    2.90
   7   3   4   21.00    2.50
  -8  -3  -4  108.29    6.10
   8   3   4  135.69    6.80
  10  -4  -4  169.28    8.00
  10  -4  -4  166.88    8.50
   9  -4  -4  205.48    9.40
   9  -4  -4  203.28    9.00
   9  -4  -4  215.58    9.50
   8  -4  -4   17.90    2.30
   8  -4  -4   13.60    2.20
   8  -4  -4   14.50    2.20
   7  -4  -4  158.98    7.10
   7  -4  -4  160.58    7.30
   7  -4  -4  163.88    7.40
   6  -4  -4  644.14   21.00
   6  -4  -4  624.74   20.70
   6  -4  -4  633.84   20.80
   5  -4  -4  218.08    8.50
   5  -4  -4  230.58    7.50
   5  -4  -4  224.88    8.60
   5  -4  -4  229.98    8.80
   4  -4  -4  153.98    6.10
   4  -4  -4  154.88    6.40
   4  -4  -4  155.98    6.20
   4  -4  -4  152.68    5.70
  -4   4   4  153.48    5.70
   3  -4  -4  788.22   24.60
   3  -4  -4  789.62   24.70
   3  -4  -4  803.12   25.00
   3  -4  -4  827.52   24.50
   2  -4  -4 1015.30   31.30
   2  -4  -4 1036.60   31.50
   1  -4  -4   81.29    4.40
   1  -4  -4  104.29    4.40
   0  -4  -4  620.34   19.00
   0  -4  -4  540.35   19.30
   0   4   4  615.44   17.90
  -1  -4  -4 1929.11   57.19
  -1  -4  -4 1872.51   56.49
   1   4   4 1888.51   54.89
  -2  -4  -4  386.26   13.40
  -2  -4  -4  396.46   13.90
   2   4   4  368.16   12.50
  -3  -4  -4  134.99    6.60
   3   4   4  143.09    5.70
   4   4   4  660.03   21.20
  -5  -4  -4  547.15   19.20
   5   4   4  537.85   18.10
  -6  -4  -4  103.69    6.10
   6   4   4  110.19    5.60
  -7  -4  -4   91.89    5.60
   7   4   4   82.99    5.10
  10  -5  -4   69.49    5.00
  10  -5  -4   71.39    5.10
   9  -5  -4   22.30    2.80
   9  -5  -4   21.60    2.50
   9  -5  -4   20.80    3.20
   8  -5  -4  115.29    6.20
   8  -5  -4  102.99    5.70
   8  -5  -4  117.29    6.10
   7  -5  -4   87.69    5.30
   7  -5  -4   83.49    4.70
   7  -5  -4   84.99    5.60
   6  -5  -4  498.85   16.80
   6  -5  -4  480.35   16.70
   6  -5  -4  476.05   14.70
   6  -5  -4  493.95   16.70
   5  -5  -4   40.10    2.80
   5  -5  -4   35.90    2.60
   5  -5  -4   35.20    2.70
   5  -5  -4   38.40    2.30
   4  -5  -4  349.07   12.00
   4  -5  -4  349.77   11.90
   4  -5  -4  353.06   12.30
   4  -5  -4  339.07   11.70
   3  -5  -4  547.85   17.50
   3  -5  -4  523.95   17.50
   3  -5  -4  535.35   17.10
   2  -5  -4   80.49    4.20
   2  -5  -4   80.59    4.00
   1  -5  -4  384.36   13.60
   1  -5  -4  382.46   13.00
   0  -5  -4  576.54   18.80
   0  -5  -4  614.54   19.70
   0   5   4  552.44   17.60
  -1  -5  -4  402.56   13.60
  -1  -5  -4  409.86   14.50
   1   5   4  370.86   11.90
  -2  -5  -4   49.00    3.70
  -2  -5  -4   43.10    3.10
  -3  -5  -4  293.87   12.00
  -3  -5  -4  311.77   11.90
   3   5   4  302.27   10.70
  -4  -5  -4  342.47   13.50
   4   5   4  338.07   12.40
  -5  -5  -4   91.59    5.80
   5   5   4   91.09    4.80
  -6  -5  -4   82.49    5.60
   6   5   4   74.59    4.60
  -7  -5  -4  140.49    7.60
   7   5   4  138.19    7.00
  10  -6  -4    5.00    1.80
   9  -6  -4    5.40    1.80
   9  -6  -4    9.70    2.00
   9  -6  -4    6.70    1.80
   8  -6  -4   78.69    5.00
   8  -6  -4   84.99    5.00
   8  -6  -4   87.09    5.20
   7  -6  -4   23.20    2.90
   7  -6  -4   20.80    2.30
   7  -6  -4   15.60    2.40
   6  -6  -4   60.69    4.00
   6  -6  -4   57.69    3.70
   6  -6  -4   61.89    3.90
   6  -6  -4   58.89    3.10
   5  -6  -4   50.69    3.40
   5  -6  -4   53.69    4.20
   5  -6  -4   52.99    3.00
   5  -6  -4   54.19    3.40
   4  -6  -4   53.39    3.30
   4  -6  -4   54.59    3.20
   4  -6  -4   60.89    3.40
   4  -6  -4   56.49    3.40
   3  -6  -4  348.17   12.00
   3  -6  -4  334.77   12.00
   3  -6  -4  321.77   11.40
   2  -6  -4  253.07    9.60
   2  -6  -4  265.77   10.10
   1  -6  -4  298.57   10.80
   1  -6  -4  302.87   11.50
   0  -6  -4  246.98   10.20
   0  -6  -4  251.87    9.50
   0   6   4  251.47    8.30
  -1  -6  -4   54.69    3.40
  -1  -6  -4   56.19    4.00
   1   6   4   52.09    2.20
  -2  -6  -4    3.70    1.30
  -2  -6  -4    2.70    1.40
  -3  -6  -4  205.58    8.80
  -3  -6  -4  201.88    9.30
  -4  -6  -4    6.40    1.80
  -4  -6  -4    7.50    2.00
   4   6   4    9.20    1.70
  -5  -6  -4   19.30    3.30
   5   6   4   21.50    2.30
  -6  -6  -4  139.59    7.80
   6   6   4  141.69    6.90
   9  -7  -4   -0.10    1.30
   9  -7  -4    0.20    1.00
   9  -7  -4   -0.40    1.20
   8  -7  -4    4.50    1.60
   8  -7  -4    5.50    1.80
   8  -7  -4    7.20    1.90
   7  -7  -4   76.99    3.20
   7  -7  -4   78.49    4.70
   7  -7  -4   87.59    5.20
   7  -7  -4   87.29    5.00
   6  -7  -4   86.19    4.80
   6  -7  -4   80.29    4.00
   6  -7  -4   91.29    5.00
   6  -7  -4   88.29    4.80
   5  -7  -4   22.80    2.40
   5  -7  -4   25.40    2.40
   5  -7  -4   25.70    2.30
   5  -7  -4   25.00    2.30
   4  -7  -4   77.79    4.30
   4  -7  -4   71.99    4.00
   4  -7  -4   81.79    4.40
   4  -7  -4   75.49    4.10
   3  -7  -4  285.97   10.80
   3  -7  -4  300.27   11.20
   3  -7  -4  291.77   10.40
   2  -7  -4   54.59    3.80
   2  -7  -4   53.29    3.40
   1  -7  -4   27.00    2.70
   1  -7  -4   26.70    2.30
   0  -7  -4   80.89    5.00
   0  -7  -4   70.59    4.20
  -1  -7  -4   79.09    4.60
  -1  -7  -4   86.49    5.40
  -2  -7  -4   60.19    4.60
  -2  -7  -4   57.29    3.90
  -3  -7  -4   62.29    4.30
  -3  -7  -4   63.29    4.80
  -4  -7  -4   54.99    4.70
  -4  -7  -4   59.39    4.40
  -5  -7  -4    0.60    1.60
  -5  -7  -4    2.40    1.60
   5   7   4    0.90    0.90
  -6  -7  -4   29.40    5.00
  -6  -7  -4   28.20    3.70
   6   7   4   30.20    3.10
   9  -8  -4   13.10    2.60
   9  -8  -4   15.40    2.50
   9  -8  -4   21.40    3.10
   8  -8  -4   85.09    5.40
   8  -8  -4   96.89    5.80
   8  -8  -4   90.09    5.40
   7  -8  -4  170.18    7.70
   7  -8  -4  152.58    6.00
   7  -8  -4  159.58    7.80
   7  -8  -4  167.78    7.60
   6  -8  -4   15.10    2.00
   6  -8  -4   19.60    2.80
   6  -8  -4   24.10    2.40
   5  -8  -4   33.40    2.80
   5  -8  -4   34.40    2.90
   5  -8  -4   32.90    2.90
   5  -8  -4   35.20    2.90
   4  -8  -4  367.36   13.20
   4  -8  -4  344.07   12.70
   4  -8  -4  367.76   12.90
   4  -8  -4  365.86   13.40
   3  -8  -4   16.10    1.80
   3  -8  -4   15.70    2.00
   3  -8  -4   21.80    2.90
   2  -8  -4   82.69    5.30
   2  -8  -4   94.79    4.90
   1  -8  -4  213.88    8.90
   1  -8  -4  234.58   10.00
   0  -8  -4  257.87   11.10
   0  -8  -4  248.28   10.30
  -1  -8  -4    8.50    2.20
  -1  -8  -4   12.60    2.20
  -2  -8  -4   72.19    4.60
  -2  -8  -4   69.19    5.20
  -3  -8  -4  118.89    7.20
  -3  -8  -4  125.99    6.70
  -4  -8  -4   72.09    5.10
  -4  -8  -4   69.49    5.50
  -5  -8  -4   23.20    3.90
  -5  -8  -4   17.10    3.70
   8  -9  -4  113.89    6.50
   8  -9  -4  121.49    6.90
   8  -9  -4  121.49    6.40
   7  -9  -4   27.50    2.40
   7  -9  -4   31.80    3.90
   7  -9  -4   31.80    3.00
   7  -9  -4   24.30    2.90
   6  -9  -4   55.39    3.70
   6  -9  -4   55.09    3.90
   6  -9  -4   67.89    5.70
   6  -9  -4   54.89    4.40
   5  -9  -4  316.47   12.00
   5  -9  -4  307.57   11.60
   5  -9  -4  299.37   11.80
   4  -9  -4   94.69    4.90
   4  -9  -4  100.99    5.30
   4  -9  -4   94.09    5.50
   4  -9  -4  103.59    5.40
   3  -9  -4   66.79    4.30
   3  -9  -4   76.69    4.40
   3  -9  -4   78.39    5.00
   2  -9  -4  255.77   10.20
   2  -9  -4  242.48   10.80
   1  -9  -4  226.38   10.30
   1  -9  -4  225.18    9.30
   0  -9  -4   78.99    5.50
   0  -9  -4   72.09    4.60
  -1  -9  -4  133.99    6.70
  -1  -9  -4  124.59    7.50
  -2  -9  -4  235.88   11.20
  -2  -9  -4  222.78    9.80
  -3  -9  -4  247.68   10.70
  -3  -9  -4  241.48   11.70
  -4  -9  -4   45.30    4.80
  -4  -9  -4   46.20    5.20
   7 -10  -4   21.50    3.10
   7 -10  -4   17.20    2.70
   7 -10  -4   17.20    2.40
   6 -10  -4   81.19    5.20
   6 -10  -4   87.49    5.50
   6 -10  -4   88.09    5.10
   6 -10  -4   86.69    5.00
   5 -10  -4   63.99    4.40
   5 -10  -4   64.79    4.20
   5 -10  -4   63.49    4.50
   5 -10  -4   65.79    4.20
   4 -10  -4   44.00    3.50
   4 -10  -4   37.60    3.20
   4 -10  -4   38.00    3.70
   4 -10  -4   40.50    3.00
   3 -10  -4  113.79    5.90
   3 -10  -4  114.29    6.60
   2 -10  -4  217.38   10.30
   2 -10  -4  228.58    9.50
   1 -10  -4  113.19    5.90
   1 -10  -4  103.69    6.60
   0 -10  -4   21.70    3.70
   0 -10  -4   25.20    2.70
  -1 -10  -4  235.18   10.00
  -1 -10  -4  213.88   10.90
  -2 -10  -4  134.59   10.00
  -2 -10  -4  142.59    7.30
  -3 -10  -4   11.60    2.50
  -3 -10  -4   11.50    3.00
   6 -11  -4   30.00    3.50
   6 -11  -4   35.70    3.30
   6 -11  -4   34.60    4.00
   6 -11  -4   37.00    3.50
   5 -11  -4   38.10    3.90
   5 -11  -4   35.10    3.20
   5 -11  -4   37.70    3.30
   5 -11  -4   35.00    3.70
   4 -11  -4   14.60    2.60
   4 -11  -4   20.60    3.30
   4 -11  -4   21.10    2.70
   3 -11  -4  130.19    6.50
   3 -11  -4  124.19    7.20
   2 -11  -4   56.29    4.80
   2 -11  -4   62.09    4.20
   1 -11  -4    3.90    2.10
   1 -11  -4    2.30    1.40
   0 -11  -4  125.89    6.70
  -1 -11  -4   88.69    5.60
  -1 -11  -4   91.19    6.70
   4 -12  -4   32.60    3.60
   4 -12  -4   32.80    3.90
   4 -12  -4   32.40    3.40
   3 -12  -4   12.20    2.30
   3 -12  -4   15.40    3.00
   2 -12  -4   13.60    3.10
   2 -12  -4   15.20    2.50
   1 -12  -4   25.50    3.10
   1 -12  -4   28.80    4.30
   0 -15   5   24.60    2.50
   0 -15   5   23.70    3.80
   1 -15   5   21.40    3.70
   1 -15   5   20.10    2.60
   2 -15   5    8.60    2.50
   2 -15   5    5.60    1.60
   3 -15   5    7.00    1.80
   3 -15   5    6.70    2.20
  -2 -14   5   91.39    6.70
  -2 -14   5   89.89    4.40
  -2 -14   5   95.49    4.10
  -1 -14   5   57.39    3.30
   0 -14   5   26.40    2.50
   0 -14   5   23.10    3.60
   1 -14   5   77.49    5.60
   1 -14   5   75.99    4.30
   2 -14   5  178.68    9.00
   2 -14   5  168.88    7.60
   3 -14   5   34.30    3.50
   3 -14   5   40.00    3.40
   4 -14   5   12.90    2.30
   4 -14   5   18.90    5.10
   4 -14   5   12.00    2.50
   5 -14   5   51.29    4.90
   5 -14   5   50.29    4.10
   5 -14   5   56.19    4.50
  -4 -13   5   10.70    2.10
  -4 -13   5    7.10    2.10
  -3 -13   5   89.09    7.10
  -3 -13   5  116.69    5.30
  -2 -13   5  251.37    8.70
  -2 -13   5  244.38   11.70
  -2 -13   5  247.28    8.90
  -1 -13   5   52.99    4.60
  -1 -13   5   59.29    3.30
   0 -13   5   70.99    5.10
   0 -13   5   65.09    4.20
   1 -13   5  207.78    9.90
   1 -13   5  210.68    8.50
   2 -13   5  206.88    9.70
   2 -13   5  206.88    8.60
   3 -13   5   11.70    2.50
   3 -13   5   13.10    2.40
   4 -13   5  152.98    7.90
   4 -13   5  144.99    7.50
   4 -13   5  146.39    7.20
   5 -13   5  207.58    9.40
   5 -13   5  207.28    9.90
   5 -13   5  210.28    9.50
   6 -13   5   58.39    4.50
   6 -13   5   44.90    4.70
   6 -13   5   53.69    4.10
  -4 -12   5   72.69    5.70
  -3 -12   5  206.08   10.10
  -3 -12   5  200.88    7.00
  -2 -12   5  121.49    5.10
  -2 -12   5  125.79    7.30
  -2 -12   5  129.39    5.30
  -1 -12   5   38.90    3.70
  -1 -12   5   33.00    2.50
   0 -12   5  340.87   13.60
   0 -12   5  321.37   11.70
   1 -12   5  232.48   10.40
   1 -12   5  261.77   10.90
   2 -12   5   37.50    3.00
   2 -12   5   33.30    3.20
   3 -12   5  127.49    6.60
   3 -12   5  126.19    6.20
   4 -12   5  181.18    8.40
   4 -12   5  199.08    8.60
   4 -12   5  191.28    8.90
   5 -12   5  101.29    5.70
   5 -12   5  115.79    6.60
   5 -12   5  106.09    5.90
   6 -12   5  116.59    6.00
   6 -12   5  103.49    6.70
   6 -12   5  122.89    6.50
   7 -12   5  131.29    7.80
   7 -12   5  126.09    6.90
   7 -12   5  129.69    6.50
  -6 -11   5   37.50    4.20
  -5 -11   5   60.09    5.10
  -4 -11   5  180.08    9.20
  -3 -11   5  110.49    6.60
  -3 -11   5  109.39    4.40
  -2 -11   5    3.60    1.70
  -2 -11   5    4.20    1.10
  -1 -11   5  197.18    6.70
  -1 -11   5  186.28    9.00
  -1 -11   5  192.18    7.40
   0 -11   5  495.65   16.40
   0 -11   5  492.05   17.90
   1 -11   5   45.40    3.60
   1 -11   5   46.80    3.10
   2 -11   5   30.10    2.90
   2 -11   5   28.50    2.60
   3 -11   5  274.97   10.60
   3 -11   5  272.17   10.90
   4 -11   5  107.79    5.60
   4 -11   5  111.09    6.00
   4 -11   5  102.09    5.50
   5 -11   5   20.80    2.90
   5 -11   5   17.70    2.70
   5 -11   5   19.80    2.70
   6 -11   5  121.89    6.10
   6 -11   5  133.09    7.30
   6 -11   5  132.89    6.80
   7 -11   5  143.99    8.20
   7 -11   5  163.88   11.00
   8 -11   5   38.90    3.50
   8 -11   5   22.60    2.80
  -7 -10   5   12.40    2.80
  -6 -10   5   25.10    3.80
  -5 -10   5   77.69    5.50
  -4 -10   5  157.88    8.10
  -3 -10   5   18.00    1.50
  -3 -10   5   15.00    2.70
  -2 -10   5    5.10    1.00
  -2 -10   5    3.90    1.50
  -1 -10   5  109.49    4.30
  -1 -10   5  122.69    6.30
  -1 -10   5  116.49    4.40
  -1 -10   5  120.29    5.10
   0 -10   5   48.50    3.00
   1 -10   5   32.60    2.80
   1 -10   5   27.90    2.30
   2 -10   5  101.99    5.10
   2 -10   5  108.39    5.50
   3 -10   5  129.29    6.10
   3 -10   5  127.19    6.10
   4 -10   5    3.10    1.40
   4 -10   5    5.50    1.50
   5 -10   5   82.09    5.20
   5 -10   5   83.99    4.90
   6 -10   5   78.39    4.80
   6 -10   5   81.39    4.30
   6 -10   5   74.09    5.20
   7 -10   5   19.50    2.10
   7 -10   5   13.80    2.80
   7 -10   5   15.00    2.60
   8 -10   5    4.60    1.40
   8 -10   5    8.00    2.10
   8 -10   5    6.00    2.50
   8   9  -5   34.10    3.40
  -8  -9   5   32.30    3.80
   7   9  -5   79.29    5.00
  -7  -9   5   70.99    5.40
   6   9  -5   22.30    2.50
  -6  -9   5   23.30    3.40
  -5  -9   5   46.50    2.20
  -5  -9   5   38.90    3.60
  -4  -9   5   59.39    2.80
  -4  -9   5   57.59    4.20
  -3  -9   5   44.80    2.40
  -3  -9   5   42.80    3.70
  -2  -9   5   46.00    2.60
  -2  -9   5   47.80    3.50
  -1  -9   5   74.69    3.60
  -1  -9   5   67.69    2.90
  -1  -9   5   70.99    4.30
   0  -9   5   71.69    4.20
   0  -9   5   69.99    3.60
   1  -9   5   65.59    3.60
   2  -9   5  143.29    6.20
   3  -9   5  232.18    9.10
   4  -9   5   25.20    2.50
   5  -9   5   56.69    3.80
   5  -9   5   55.59    4.10
   6  -9   5  109.59    6.00
   6  -9   5  131.39    6.80
   7  -9   5   61.89    4.20
   7  -9   5   57.79    4.60
   8  -9   5   11.80    2.20
   8  -9   5   13.10    1.70
   8  -9   5   11.10    2.40
   8   8  -5  125.39    9.10
  -8  -8   5  115.29    6.80
   7   8  -5   90.29    5.20
  -7  -8   5   82.39    5.50
   6   8  -5   19.10    2.60
  -6  -8   5   18.60    2.80
   5   8  -5  384.76   13.60
  -5  -8   5  375.26   12.20
  -5  -8   5  377.56   16.60
  -4  -8   5  400.56   14.80
  -4  -8   5  404.96   12.80
  -3  -8   5  190.18    6.80
  -3  -8   5  194.28    8.30
  -2  -8   5   44.20    3.10
  -2  -8   5   39.10    2.30
  -1  -8   5  570.84   17.60
  -1  -8   5  526.75   16.90
  -1  -8   5  562.74   18.50
   0  -8   5  414.96   13.70
   1  -8   5   31.60    2.30
   2  -8   5  445.86   15.00
   3  -8   5  208.48    8.20
   3  -8   5  204.58    8.20
   4  -8   5   66.59    3.90
   4  -8   5   65.09    4.00
  -5   8  -5   82.69    3.50
   5  -8   5   75.89    4.80
   5  -8   5   79.39    4.50
   6  -8   5  130.39    6.20
   6  -8   5  117.29    6.50
   7  -8   5   15.00    2.70
   7  -8   5   13.00    2.20
   8  -8   5    2.50    1.50
   8  -8   5    4.30    1.60
   9  -8   5   55.79    4.90
   9  -8   5   58.29    4.30
   9   7  -5  148.59    7.60
  -9  -7   5  146.49    7.40
   8   7  -5   85.69    5.20
  -8  -7   5   82.19    5.20
  -8  -7   5   87.29    3.80
   7   7  -5   61.29    4.10
  -7  -7   5   63.79    5.20
  -7  -7   5   64.49    3.00
   6   7  -5  351.26   12.70
  -6  -7   5  345.47   13.20
  -6  -7   5  345.67   11.30
   5   7  -5  700.23   23.80
  -5  -7   5  690.53   21.10
  -5  -7   5  675.13   22.90
   4   7  -5   80.79    4.00
  -4  -7   5   79.09    3.50
  -4  -7   5   77.79    4.50
  -3  -7   5  355.86   11.80
  -3  -7   5  376.06   13.10
  -2  -7   5 1275.87   38.10
  -2  -7   5 1287.07   38.10
  -2  -7   5 1279.87   39.20
  -1  -7   5 1086.79   32.20
  -1  -7   5 1048.10   31.40
   0  -7   5  173.78    6.60
   1  -7   5  472.85   15.40
   2  -7   5  643.94   20.50
   3  -7   5  389.86   13.70
   3  -7   5  410.26   13.70
  -4   7  -5  103.29    4.20
   4  -7   5   97.79    4.90
   4  -7   5   92.89    4.90
   5  -7   5  600.94   20.50
   5  -7   5  618.34   20.40
   6  -7   5  148.19    7.20
   6  -7   5  146.29    6.70
   7  -7   5   10.70    2.10
   7  -7   5   12.30    2.10
   8  -7   5   97.29    5.50
   8  -7   5  100.59    6.20
   9  -7   5  187.98    8.80
   9  -7   5  188.18   10.50
   9   6  -5  107.99    8.40
  -9  -6   5   98.29    5.80
   8   6  -5   17.10    2.60
  -8  -6   5   15.50    2.40
   7   6  -5  134.49    6.30
  -7  -6   5  121.09    6.20
   6   6  -5  517.85   17.70
  -6  -6   5  542.25   18.20
   5   6  -5   88.79    4.20
  -5  -6   5   68.89    4.10
   4   6  -5  180.18    6.90
  -4  -6   5  178.08    7.40
   3   6  -5  903.21   27.60
  -3  -6   5  913.01   28.30
  -3  -6   5  901.41   27.30
  -2  -6   5 1224.98   36.20
  -2  -6   5 1205.08   36.00
  -1  -6   5  304.27   10.00
  -1  -6   5  294.57    9.40
   0  -6   5   92.99    4.00
   1  -6   5  734.23   22.80
   2  -6   5  487.75   15.90
  -3   6  -5  220.98    7.20
   3  -6   5  251.47    8.60
   3  -6   5  207.08    8.30
  -4   6  -5  539.45   16.90
   4  -6   5  547.45   18.20
   4  -6   5  561.14   18.10
   5  -6   5  819.72   25.60
   5  -6   5  780.12   25.90
   6  -6   5   64.49    3.80
   6  -6   5   55.39    4.00
   7  -6   5  120.39    5.90
   7  -6   5  114.99    6.40
   8  -6   5  220.28   10.00
   8  -6   5  209.28    9.00
   9  -6   5  106.49    7.40
   9  -6   5  101.69    5.60
   9   5  -5   10.60    2.20
  -9  -5   5    5.20    1.70
   8   5  -5   25.60    2.60
  -8  -5   5   26.50    2.60
   7   5  -5  231.08    9.60
  -7  -5   5  250.97    9.40
   6   5  -5   70.29    3.90
  -6  -5   5   61.19    3.60
   5   5  -5   18.30    1.70
  -5  -5   5   19.30    1.90
   4   5  -5  237.88    8.80
  -4  -5   5  268.77    9.30
   3   5  -5 1150.58   34.40
   2   5  -5  228.78    7.50
  -2  -5   5  217.08    7.60
  -2  -5   5  219.48    7.50
   1   5  -5  432.86   13.10
  -1  -5   5  430.56   13.70
  -1  -5   5  425.86   13.10
   0  -5   5  827.22   25.10
   1  -5   5 1258.97   37.70
  -2   5  -5    0.70    0.30
   2  -5   5    0.10    0.40
   2  -5   5    0.00    0.50
   3  -5   5  655.93   20.40
   3  -5   5  623.14   20.30
   4  -5   5  511.65   16.90
   4  -5   5  501.35   16.70
   5  -5   5  179.28    7.70
   5  -5   5  180.98    7.30
   6  -5   5   82.19    6.90
   7  -5   5  156.08    7.00
   7  -5   5  159.58    7.70
   8  -5   5  109.09    5.60
   8  -5   5  106.99    6.20
   9  -5   5    3.50    1.60
   9  -5   5    3.60    1.30
  10   4  -5   23.00    3.50
   9   4  -5   17.20    2.70
  -9  -4   5   16.80    1.90
   8   4  -5   45.60    3.50
  -8  -4   5   39.40    2.80
   7   4  -5   63.49    4.00
  -7  -4   5   74.49    3.80
   6   4  -5  129.29    5.80
  -6  -4   5  126.09    5.40
   5   4  -5  105.99    4.70
  -5  -4   5  103.09    4.60
   4   4  -5  100.69    4.60
   4   4  -5   88.39    4.20
  -4  -4   5  111.99    4.40
   3   4  -5  501.75   15.80
   3   4  -5  489.85   15.40
   2   4  -5  598.64   18.20
   2   4  -5  617.34   18.10
  -2  -4   5  586.84   18.20
  -2  -4   5  576.64   18.10
   1   4  -5  883.61   25.90
  -1  -4   5  878.81   25.80
  -1  -4   5  857.81   25.80
   0   4  -5  629.14   18.20
   0  -4   5  598.14   18.10
   0  -4   5  606.74   18.90
  -1   4  -5  303.37    9.40
   1  -4   5  309.87   10.20
  -2   4  -5  319.27   10.30
   2  -4   5  335.27   10.90
   2  -4   5  337.27   11.10
   3  -4   5   88.89    4.10
   3  -4   5   85.19    4.00
   4  -4   5  136.19    5.90
   4  -4   5  137.29    5.70
   5  -4   5   77.49    4.00
   5  -4   5   80.19    4.40
   6  -4   5  165.98    7.50
   6  -4   5  166.48    6.90
   7  -4   5  183.28    7.70
   7  -4   5  198.68    8.70
   8  -4   5   29.40    3.10
   8  -4   5   28.90    2.50
   9  -4   5   16.20    2.80
   9  -4   5   15.70    2.40
  10   3  -5   97.69    6.70
   9   3  -5  108.89    6.00
   8   3  -5  103.69    5.40
  -8  -3   5   97.49    4.60
   7   3  -5  272.57   10.90
   6   3  -5  229.78    8.70
   5   3  -5   12.20    1.30
   5   3  -5    8.80    1.50
  -5  -3   5   10.30    1.10
   4   3  -5  638.74   19.90
   4   3  -5  647.54   20.40
   3   3  -5  802.42   24.00
   3   3  -5  780.32   23.40
  -3  -3   5  754.12   23.50
   2   3  -5  302.67    9.80
   2   3  -5  292.17    9.40
  -2  -3   5  303.87    9.70
  -2  -3   5  309.17    9.90
   1   3  -5   63.79    2.80
  -1  -3   5   68.19    2.50
  -1  -3   5   71.89    2.80
   0   3  -5  732.83   21.80
   0  -3   5  729.13   22.20
   0  -3   5  737.33   22.10
   0  -3   5  727.53   21.70
  -1   3  -5  459.85   13.20
   1  -3   5  411.16   13.60
   1  -3   5  417.76   13.20
  -2   3  -5  364.16   12.10
   2  -3   5  381.46   12.30
   2  -3   5  382.16   12.10
  -3   3  -5  158.38    6.10
   3  -3   5  169.88    6.40
   3  -3   5  176.18    6.40
  -4   3  -5  700.03   21.20
   4  -3   5  681.93   21.40
   4  -3   5  660.43   21.70
  -5   3  -5  113.79    4.70
   5  -3   5  108.99    5.30
   5  -3   5  109.79    4.90
   6  -3   5   43.80    2.80
   6  -3   5   46.80    3.40
   7  -3   5   44.00    3.50
   7  -3   5   47.80    3.50
   8  -3   5  101.89    5.10
   8  -3   5  107.69    6.10
   9  -3   5   13.40    2.50
   9  -3   5   11.80    2.00
  10   2  -5   81.39    5.40
   9   2  -5   34.80    3.20
   8   2  -5  302.87   11.60
   7   2  -5  284.77   10.90
  -7  -2   5  296.67    9.30
   6   2  -5   90.49    4.50
   6   2  -5   89.59    4.80
  -6  -2   5   95.69    3.70
   5   2  -5  567.24   18.30
   5   2  -5  546.45   17.70
  -5  -2   5  550.34   17.00
   4   2  -5  689.63   21.80
   4   2  -5  695.83   21.20
   3   2  -5  950.20   28.10
   3   2  -5  929.31   27.40
  -3  -2   5  890.51   27.50
   2   2  -5  140.09    4.60
   2   2  -5  138.69    5.20
  -2  -2   5  140.39    5.20
  -2  -2   5  140.59    4.70
  -2  -2   5  145.79    5.00
   1   2  -5 1077.59   31.60
  -1  -2   5 1063.59   30.80
  -1  -2   5 1054.19   31.50
   0   2  -5 1918.81   58.69
   0  -2   5 2040.50   57.99
   0  -2   5 2022.70   58.49
   0  -2   5 2069.79   58.79
  -1   2  -5  140.19    5.20
  -1   2  -5  142.19    5.50
   1  -2   5  155.18    5.10
   1  -2   5  155.88    5.50
  -2   2  -5  549.15   16.60
  -2   2  -5  512.95   16.20
   2  -2   5  528.15   16.50
   2  -2   5  521.15   16.30
  -3   2  -5  668.73   20.30
   3  -2   5  631.54   20.10
   3  -2   5  649.83   20.30
  -4   2  -5  246.98    8.80
   4  -2   5  248.18    8.70
   4  -2   5  252.47    9.10
  -5   2  -5  197.38    7.40
   5  -2   5  197.88    7.30
   5  -2   5  186.08    7.70
  -6   2  -5  397.46   13.60
   6  -2   5  413.46   13.60
   6  -2   5  402.36   14.40
  -7   2  -5  280.57   10.00
   7  -2   5  272.17   10.00
   7  -2   5  280.67   11.20
   8  -2   5   47.30    3.10
   8  -2   5   47.70    3.90
   9  -2   5   35.10    2.70
   9  -2   5   35.80    3.70
  10   1  -5   29.70    3.20
   9   1  -5  100.99    5.70
   8   1  -5  269.97   10.70
   7   1  -5   41.80    3.00
   7   1  -5   41.70    3.50
   6   1  -5  150.78    6.70
   6   1  -5  146.49    6.20
   5   1  -5  788.12   24.30
   5   1  -5  772.02   23.70
  -5  -1   5  730.73   22.50
   4   1  -5 2053.69   58.89
   4   1  -5 1973.90   59.49
  -4  -1   5 1995.90   58.19
   3   1  -5    6.10    1.00
   3   1  -5    7.20    0.70
   2   1  -5  947.01   27.10
   2   1  -5  921.51   26.60
   2   1  -5  919.81   27.60
  -2  -1   5  905.51   26.70
  -2  -1   5  876.61   27.50
   1   1  -5 1859.51   55.19
  -1  -1   5 1919.01   55.29
  -1  -1   5 1897.41   55.29
   0   1  -5 1323.07   38.20
   0   1  -5 1264.77   38.00
   0  -1   5 1249.97   37.90
   0  -1   5 1312.57   38.30
  -1   1  -5  790.62   24.40
  -1   1  -5  830.02   25.00
  -1   1  -5  849.91   25.20
   1  -1   5  828.72   24.90
   1  -1   5  838.12   24.40
  -2   1  -5  663.53   20.10
  -2   1  -5  614.64   19.50
   2  -1   5  634.34   19.60
   2  -1   5  655.43   19.50
  -3   1  -5  942.21   29.30
   3  -1   5  987.90   28.90
   3  -1   5  946.71   29.00
  -4   1  -5  151.38    6.40
   4  -1   5  167.98    6.10
   4  -1   5  165.78    6.50
  -5   1  -5  225.08    8.40
   5  -1   5  218.68    8.60
   5  -1   5  218.98    7.90
  -6   1  -5  580.54   19.00
   6  -1   5  589.84   19.70
   6  -1   5  586.54   18.60
  -7   1  -5  185.08    7.40
   7  -1   5  186.28    7.10
   7  -1   5  180.08    8.20
  -8   1  -5   67.19    4.10
   8  -1   5   64.79    4.50
   8  -1   5   62.19    3.50
  -9   1  -5  155.18    6.50
   9  -1   5  148.59    6.40
  10   0  -5   50.99    4.10
   9   0  -5  138.69    6.90
   8   0  -5  201.98    8.40
   8   0  -5  180.58    8.50
   7   0  -5   13.70    2.00
   7   0  -5   11.50    2.10
   6   0  -5  256.07    9.80
   6   0  -5  246.88    9.30
   5   0  -5  530.55   17.40
   5   0  -5  513.85   16.70
   4   0  -5   61.39    2.90
   4   0  -5   59.19    3.30
  -4   0   5   64.49    2.50
   3   0  -5  298.97   10.00
   3   0  -5  291.67    9.10
   3   0  -5  292.47    9.10
  -3   0   5  278.67    9.20
  -3   0   5  275.77    9.20
   2   0  -5 1102.09   33.30
   2   0  -5 1096.39   32.00
   2   0  -5 1107.09   32.60
  -2   0   5 1101.99   32.70
   1   0  -5 1688.13   48.60
   1   0  -5 1664.53   48.50
  -1   0   5 1661.33   48.60
  -1   0   5 1581.64   48.40
   0   0  -5  322.37   10.60
   0   0  -5  321.27   10.60
  -1   0  -5  181.18    7.00
  -1   0  -5  178.78    6.80
  -1   0  -5  176.88    6.20
   1   0   5  205.98    6.50
   1   0   5  208.88    6.20
  -2   0  -5  964.90   29.40
  -2   0  -5  884.91   28.60
   2   0   5  986.40   28.60
   2   0   5 1001.90   28.60
  -3   0  -5  227.78    8.50
   3   0   5  233.18    7.70
   3   0   5  216.58    7.90
  -4   0  -5  567.44   18.40
   4   0   5  559.84   17.40
   4   0   5  559.54   18.10
  -5   0  -5  672.13   20.80
   5   0   5  626.54   19.70
   5   0   5  616.04   20.60
  -6   0  -5  109.69    5.30
   6   0   5  102.89    4.40
   6   0   5  113.19    7.80
  -7   0  -5   69.19    4.50
   7   0   5   73.59    3.50
   7   0   5   72.69    4.60
  -8   0  -5  214.18    8.50
   8   0   5  209.88    7.80
   8   0   5  209.28    9.40
  10  -1  -5   14.00    2.50
   9  -1  -5   41.00    3.50
   8  -1  -5   12.20    2.10
   8  -1  -5    9.60    2.00
   7  -1  -5  105.79    5.20
   7  -1  -5  102.09    5.50
   6  -1  -5  269.97    9.80
   6  -1  -5  260.47   10.10
   5  -1  -5   67.09    3.70
   5  -1  -5   65.69    3.40
   4  -1  -5   62.59    3.00
   4  -1  -5   60.79    2.40
   4  -1  -5   63.29    3.40
  -4   1   5   65.69    2.70
   3  -1  -5  169.68    5.80
   3  -1  -5  169.18    5.80
   3  -1  -5  167.08    6.50
   2  -1  -5  601.84   17.90
   2  -1  -5  602.64   18.50
   2  -1  -5  590.74   18.80
  -2   1   5  609.14   18.60
   1  -1  -5   59.29    2.90
   1  -1  -5   55.49    1.90
   1  -1  -5   54.79    2.80
   0  -1  -5  628.44   19.80
   0  -1  -5  654.33   20.10
   0  -1  -5  636.64   18.80
  -1  -1  -5  625.74   19.30
  -1  -1  -5  598.74   18.40
  -1  -1  -5  613.34   19.60
   1   1   5  617.84   18.40
  -2  -1  -5  249.68    9.20
  -2  -1  -5  255.37    9.00
  -2  -1  -5  252.07    8.70
   2   1   5  243.28    8.10
   2   1   5  242.18    8.20
  -3  -1  -5  180.58    7.40
   3   1   5  180.88    6.70
   3   1   5  190.78    6.30
  -4  -1  -5  263.87   10.10
   4   1   5  268.67    9.60
   4   1   5  274.97    8.80
  -5  -1  -5   36.70    3.00
   5   1   5   48.50    3.10
   5   1   5   48.30    2.30
  -6  -1  -5    3.80    1.50
   6   1   5    5.60    0.90
   6   1   5    5.90    1.30
  -7  -1  -5   82.39    4.70
   7   1   5   78.19    3.50
   7   1   5   79.79    4.70
  -8  -1  -5   94.89    5.20
   8   1   5   88.49    5.40
  10  -2  -5   13.70    2.50
   9  -2  -5   28.20    2.90
   9  -2  -5   33.90    3.30
   8  -2  -5   20.90    2.40
   8  -2  -5   21.00    2.60
   7  -2  -5    0.00    0.80
   6  -2  -5   95.69    4.60
   6  -2  -5   85.09    4.70
   5  -2  -5   80.39    4.00
   5  -2  -5   85.09    4.30
  -5   2   5   81.19    3.00
   4  -2  -5   39.60    2.60
   4  -2  -5   36.20    1.90
   4  -2  -5   38.20    2.60
  -4   2   5   40.50    2.10
   3  -2  -5  156.28    6.20
   3  -2  -5  157.78    5.50
   3  -2  -5  155.68    5.70
  -3   2   5  146.39    5.70
   2  -2  -5  413.96   13.40
   2  -2  -5  420.96   12.60
   2  -2  -5  402.16   13.60
   1  -2  -5  179.28    6.90
   1  -2  -5  178.88    6.90
   1  -2  -5  183.58    5.90
  -1   2   5  197.08    6.80
   0  -2  -5  675.33   19.90
   0  -2  -5  665.63   20.90
   0  -2  -5  665.53   21.20
  -1  -2  -5  281.97   10.10
  -1  -2  -5  266.07    8.80
  -1  -2  -5  270.57    9.70
   1   2   5  272.57    8.70
  -2  -2  -5  113.59    5.40
  -2  -2  -5  121.79    5.70
   2   2   5  127.39    4.80
   2   2   5  136.79    4.50
  -3  -2  -5    9.80    1.80
   3   2   5    6.80    1.10
   3   2   5    5.90    0.80
  -4  -2  -5    4.30    1.30
   4   2   5    7.10    0.80
   4   2   5    4.80    1.10
  -5  -2  -5   26.70    3.00
   5   2   5   26.90    2.20
   5   2   5   25.60    1.40
  -6  -2  -5   20.30    2.50
   6   2   5   25.80    2.40
   6   2   5   25.00    1.40
  -7  -2  -5   43.10    3.50
   7   2   5   34.90    3.10
  -8  -2  -5   23.20    3.10
   8   2   5   18.90    3.00
  10  -3  -5   70.69    5.00
   9  -3  -5   42.60    3.50
   9  -3  -5   39.50    3.70
   8  -3  -5   63.59    4.10
   8  -3  -5   63.09    4.40
   7  -3  -5  152.18    6.80
   7  -3  -5  144.69    6.60
   7  -3  -5  146.09    8.20
   6  -3  -5  414.06   14.20
   6  -3  -5  413.86   14.60
   6  -3  -5  400.26   14.10
   5  -3  -5  189.18    6.40
   5  -3  -5  206.08    8.00
   5  -3  -5  193.28    7.50
   5  -3  -5  195.38    7.60
  -5   3   5  187.38    6.50
   4  -3  -5  108.69    4.50
   4  -3  -5  100.89    4.10
   4  -3  -5  102.89    4.90
  -4   3   5   99.99    4.20
   3  -3  -5  707.63   22.00
   3  -3  -5  724.23   22.30
   3  -3  -5  733.93   22.90
   2  -3  -5  706.83   22.40
   2  -3  -5  710.63   22.30
   1  -3  -5   53.69    3.20
   1  -3  -5   53.39    2.30
   1  -3  -5   54.59    3.00
   0  -3  -5  324.97   10.30
   0  -3  -5  328.97   11.20
   0  -3  -5  322.07   11.60
   0   3   5  320.17   10.20
  -1  -3  -5  613.94   20.00
  -1  -3  -5  630.64   20.50
  -2  -3  -5  139.49    5.90
  -2  -3  -5  137.19    6.30
   2   3   5  123.29    4.40
   2   3   5  120.99    4.90
  -3  -3  -5  171.08    7.40
  -3  -3  -5  164.58    7.50
   3   3   5  176.18    6.60
  -4  -3  -5  213.48   11.90
   4   3   5  212.78    8.10
  -5  -3  -5  231.48   10.10
   5   3   5  256.87   12.20
  -6  -3  -5   12.90    2.30
   6   3   5   11.70    2.10
  -7  -3  -5   26.20    3.00
   7   3   5   28.50    2.90
  10  -4  -5  111.69    6.60
  10  -4  -5  112.29    6.70
   9  -4  -5   32.40    3.30
   9  -4  -5   27.50    3.00
   8  -4  -5  114.79    6.20
   8  -4  -5  112.19    5.90
   8  -4  -5  116.39    6.10
   7  -4  -5  514.65   17.80
   7  -4  -5  505.45   18.70
   7  -4  -5  532.65   18.00
   6  -4  -5  439.06   15.10
   6  -4  -5  440.76   15.10
   6  -4  -5  430.86   15.30
   5  -4  -5   31.30    2.60
   5  -4  -5   33.30    2.50
   5  -4  -5   29.10    1.90
   5  -4  -5   32.30    2.50
  -5   4   5   34.80    1.90
   4  -4  -5  426.66   14.00
   4  -4  -5  405.26   13.70
   4  -4  -5  440.26   14.60
   3  -4  -5  631.14   19.40
   3  -4  -5  590.64   19.50
   3  -4  -5  592.74   18.80
   2  -4  -5  175.38    7.00
   2  -4  -5  165.78    6.80
   1  -4  -5  249.48    9.30
   1  -4  -5  256.87    9.60
   0  -4  -5 1009.50   31.30
   0  -4  -5 1017.00   31.90
   0   4   5 1012.90   30.10
  -1  -4  -5  363.76   12.80
  -1  -4  -5  372.06   13.50
  -2  -4  -5   53.89    3.80
  -2  -4  -5   49.70    3.30
   2   4   5   48.20    2.70
  -3  -4  -5  347.77   13.90
  -3  -4  -5  356.76   15.70
   3   4   5  350.46   12.00
  -4  -4  -5  503.95   18.00
   4   4   5  495.35   16.60
  -5  -4  -5  104.39    6.10
   5   4   5  112.59    5.40
  -6  -4  -5   78.99    5.30
   6   4   5   70.19    4.40
  -7  -4  -5  209.98   10.00
   7   4   5  231.38    9.60
  10  -5  -5   22.10    3.30
  10  -5  -5   15.40    2.90
   9  -5  -5   23.00    2.70
   9  -5  -5   21.60    2.80
   9  -5  -5   18.40    2.90
   8  -5  -5  212.78    9.30
   8  -5  -5  222.08    9.40
   8  -5  -5  203.08    9.00
   7  -5  -5  118.79    5.90
   7  -5  -5  117.09    6.00
   7  -5  -5  114.89    8.40
   6  -5  -5   13.80    2.20
   6  -5  -5   14.70    2.10
   6  -5  -5   12.40    1.20
   6  -5  -5   14.10    2.10
   5  -5  -5  408.86   14.20
   5  -5  -5  418.96   14.50
   5  -5  -5  406.66   13.40
   5  -5  -5  412.16   14.10
   4  -5  -5  454.45   15.80
   4  -5  -5  464.95   15.40
   4  -5  -5  454.25   15.20
   4  -5  -5  465.15   15.20
   3  -5  -5  328.07   11.10
   3  -5  -5  338.27   11.90
   3  -5  -5  327.57   11.80
   2  -5  -5  219.68    8.70
   2  -5  -5  218.98    8.50
   1  -5  -5  594.54   20.30
   1  -5  -5  624.44   19.90
   0  -5  -5  522.15   18.00
   0  -5  -5  519.95   17.40
  -1  -5  -5   70.59    4.50
  -1  -5  -5   62.19    3.80
   1   5   5   68.09    3.10
  -2  -5  -5  507.35   18.20
  -2  -5  -5  509.15   17.50
  -3  -5  -5  623.44   21.30
  -3  -5  -5  624.14   21.90
   3   5   5  630.94   20.10
  -4  -5  -5  288.67   11.90
  -4  -5  -5  316.57   12.60
   4   5   5  294.87   10.90
  -5  -5  -5   37.60    3.70
  -5  -5  -5   38.20    3.60
   5   5   5   38.80    3.00
  -6  -5  -5  377.26   15.30
   6   5   5  393.06   14.30
   9  -6  -5   60.69    4.70
   9  -6  -5   73.19    5.00
   9  -6  -5   65.69    4.60
   8  -6  -5  228.68    9.90
   8  -6  -5  232.58    9.90
   8  -6  -5  230.68   10.00
   7  -6  -5   14.10    2.50
   7  -6  -5   14.80    2.40
   7  -6  -5   14.50    2.40
   6  -6  -5  109.19    4.70
   6  -6  -5  123.09    6.10
   6  -6  -5  116.39    5.80
   6  -6  -5  121.59    5.90
   5  -6  -5  211.48    8.40
   5  -6  -5  196.78    8.50
   5  -6  -5  213.88    8.40
   5  -6  -5  208.58    7.90
   4  -6  -5   70.39    3.80
   4  -6  -5   63.59    3.60
   4  -6  -5   62.59    3.90
   4  -6  -5   62.39    3.70
   3  -6  -5   29.80    2.50
   3  -6  -5   29.40    2.70
   2  -6  -5  278.47   11.10
   2  -6  -5  301.07   10.90
   1  -6  -5  544.85   18.60
   1  -6  -5  578.94   19.50
   0  -6  -5  116.69    7.70
   0  -6  -5  111.79    5.50
  -1  -6  -5   91.09    5.00
  -1  -6  -5   92.69    5.50
   1   6   5   89.29    3.50
  -2  -6  -5  211.88    9.00
  -2  -6  -5  219.28    9.80
  -3  -6  -5  307.37   13.00
  -3  -6  -5  322.67   12.50
  -4  -6  -5    8.80    1.90
  -4  -6  -5   10.50    2.40
   4   6   5   11.80    1.90
  -5  -6  -5  166.08    8.70
  -5  -6  -5  168.58    8.50
   5   6   5  161.08    7.40
  -6  -6  -5  181.28    9.20
  -6  -6  -5  195.08   11.90
   6   6   5  176.58    8.20
   9  -7  -5   15.90    2.70
   9  -7  -5   18.60    3.10
   9  -7  -5   15.00    2.80
   8  -7  -5   59.49    4.40
   8  -7  -5   54.29    4.10
   8  -7  -5   53.39    4.10
   7  -7  -5   44.70    3.70
   7  -7  -5   36.60    3.20
   7  -7  -5   35.20    3.20
   6  -7  -5   42.00    3.30
   6  -7  -5   41.20    3.20
   6  -7  -5   38.30    2.60
   6  -7  -5   43.80    3.30
   5  -7  -5   84.89    4.80
   5  -7  -5   80.99    4.50
   5  -7  -5   88.89    4.60
   5  -7  -5   87.19    4.70
   4  -7  -5    4.60    1.30
   4  -7  -5    6.90    1.70
   4  -7  -5    6.30    1.60
   3  -7  -5  151.38    6.80
   3  -7  -5  123.99    6.20
   2  -7  -5  133.69    6.20
   2  -7  -5  125.59    6.60
   1  -7  -5  102.69    5.30
   1  -7  -5  101.79    5.90
   0  -7  -5   42.20    3.70
  -1  -7  -5   86.29    5.00
  -1  -7  -5   99.99    5.90
  -2  -7  -5  107.19    5.90
  -2  -7  -5  109.39    6.50
  -3  -7  -5   55.29    4.60
  -3  -7  -5   45.50    3.80
  -4  -7  -5   71.29    5.00
  -4  -7  -5   63.89    5.30
   9  -8  -5   46.30    4.00
   8  -8  -5   74.29    5.00
   8  -8  -5   80.89    5.30
   7  -8  -5   16.50    2.00
   7  -8  -5   19.80    3.00
   7  -8  -5   18.20    2.70
   7  -8  -5   14.60    2.50
   6  -8  -5   10.80    2.10
   6  -8  -5    9.80    1.80
   6  -8  -5    9.50    2.00
   6  -8  -5    8.20    2.00
   5  -8  -5  172.18    7.80
   5  -8  -5  170.88    7.60
   5  -8  -5  172.48    7.60
   5  -8  -5  180.98    7.70
   4  -8  -5   48.20    3.40
   4  -8  -5   46.80    3.60
   3  -8  -5    8.60    2.00
   3  -8  -5    4.70    1.70
   2  -8  -5   48.60    4.00
   1  -8  -5  134.49    7.20
   1  -8  -5  133.29    6.50
   0  -8  -5    4.10    1.70
   0  -8  -5    2.30    1.20
  -1  -8  -5   28.40    3.00
  -1  -8  -5   35.60    3.60
  -2  -8  -5   68.09    4.60
  -2  -8  -5   60.09    4.90
  -3  -8  -5   19.90    3.30
  -3  -8  -5   19.60    3.00
  -4  -8  -5   34.90    5.00
  -4  -8  -5   33.40    3.80
   8  -9  -5   43.80    4.00
   8  -9  -5   56.69    4.70
   8  -9  -5   52.39    4.20
   7  -9  -5    1.70    1.60
   7  -9  -5    0.90    1.30
   7  -9  -5   -1.00    1.20
   7  -9  -5    1.70    1.20
   6  -9  -5  138.39    6.70
   6  -9  -5  126.89    6.20
   6  -9  -5  124.79    6.70
   6  -9  -5  127.39    6.60
   5  -9  -5  152.38    7.30
   5  -9  -5  158.88    7.30
   5  -9  -5  154.28    7.30
   4  -9  -5    3.90    1.50
   4  -9  -5    3.20    1.40
   4  -9  -5    3.50    1.30
   3  -9  -5  111.09    5.80
   3  -9  -5  107.19    6.30
   2  -9  -5  232.78   10.60
   2  -9  -5  231.68    9.80
   1  -9  -5  126.09    7.30
   1  -9  -5  125.79    6.40
   0  -9  -5   69.99    5.30
   0  -9  -5   67.09    4.50
  -1  -9  -5  124.29    6.50
  -1  -9  -5  110.39    7.10
  -2  -9  -5   68.99    5.60
  -2  -9  -5   76.19    5.10
  -3  -9  -5    3.30    1.90
  -3  -9  -5    6.40    1.90
   7 -10  -5   74.09    4.80
   7 -10  -5   66.79    4.30
   7 -10  -5   71.99    5.40
   6 -10  -5  142.89    7.40
   6 -10  -5  142.09    7.10
   6 -10  -5  141.69    6.90
   5 -10  -5   28.80    3.00
   5 -10  -5   30.20    3.40
   5 -10  -5   32.80    3.30
   4 -10  -5   67.69    4.50
   4 -10  -5   65.39    4.90
   4 -10  -5   63.79    4.50
   3 -10  -5  197.38    8.70
   3 -10  -5  194.68    9.40
   2 -10  -5   93.69    6.10
   2 -10  -5   90.99    5.50
   1 -10  -5   27.20    2.90
   1 -10  -5   23.20    3.70
   0 -10  -5  175.98    8.30
   0 -10  -5  169.98    9.30
  -1 -10  -5  168.98    9.70
  -1 -10  -5  185.48    8.70
  -2 -10  -5   49.40    5.00
  -2 -10  -5   58.39    4.60
   5 -11  -5   12.40    2.60
   5 -11  -5   11.90    2.30
   5 -11  -5    9.50    2.20
   4 -11  -5  140.99    7.70
   4 -11  -5  134.59    7.00
   4 -11  -5  140.69    7.00
   3 -11  -5   60.39    4.40
   3 -11  -5   54.69    4.70
   2 -11  -5   17.30    2.80
   2 -11  -5   15.70    3.10
   1 -11  -5  114.09    7.60
   1 -11  -5  126.89    6.70
   0 -11  -5  154.28    7.90
   0 -11  -5  154.78    8.90
  -1 -15   6    4.90    1.60
   0 -15   6   69.49    5.60
   0 -15   6   68.69    4.10
   1 -15   6   83.49    6.10
   1 -15   6   94.89    5.00
   2 -15   6    1.20    1.30
   2 -15   6    1.10    1.30
   3 -15   6   29.90    3.20
   3 -15   6   21.80    4.30
  -3 -14   6   27.90    2.70
  -3 -14   6   33.30    4.10
  -2 -14   6   29.30    4.30
  -2 -14   6   36.20    2.60
  -2 -14   6   33.60    2.40
  -1 -14   6   19.80    3.70
  -1 -14   6   22.30    2.20
   0 -14   6   15.20    2.80
   0 -14   6   13.30    2.00
   1 -14   6   37.50    3.80
   1 -14   6   35.30    2.90
   2 -14   6   18.00    2.60
   2 -14   6   17.20    3.00
   3 -14   6   22.50    3.10
   3 -14   6   23.90    3.50
   4 -14   6   28.70    3.00
   4 -14   6   28.40    3.10
   5 -14   6   19.30    3.50
   5 -14   6   26.90    3.70
   5 -14   6   31.30    3.30
  -4 -13   6   24.70    4.10
  -3 -13   6  135.29    8.20
  -3 -13   6  150.08    6.20
  -3 -13   6  141.59    5.60
  -2 -13   6   71.89    5.50
  -2 -13   6   72.49    3.70
  -2 -13   6   70.19    3.50
  -1 -13   6    9.00    2.20
  -1 -13   6    7.40    1.50
   0 -13   6  178.78    7.60
   0 -13   6  194.08    9.40
   1 -13   6   87.79    5.70
   1 -13   6   84.39    4.80
   2 -13   6   32.00    3.10
   2 -13   6   25.90    2.80
   3 -13   6   28.30    3.00
   3 -13   6   24.10    2.60
   4 -13   6  115.89    6.40
   4 -13   6  109.89    6.60
   4 -13   6  118.59    6.30
   5 -13   6   55.89    4.20
   5 -13   6   61.19    4.40
   5 -13   6   52.49    4.60
   6 -13   6    1.30    1.30
   6 -13   6   -1.20    1.40
   6 -13   6   -0.90    1.00
  -5 -12   6   65.99    5.60
  -4 -12   6  344.07   14.50
  -4 -12   6  322.27   10.70
  -3 -12   6   90.79    6.20
  -3 -12   6   97.49    4.30
  -2 -12   6   51.89    3.10
  -2 -12   6   48.90    2.80
  -2 -12   6   49.90    4.30
  -1 -12   6  289.77   10.50
   0 -12   6  455.55   15.60
   1 -12   6   45.40    3.30
   1 -12   6   48.70    3.90
   2 -12   6   90.59    5.00
   2 -12   6   93.59    5.50
   3 -12   6  362.46   14.10
   3 -12   6  375.36   13.80
   4 -12   6  127.69    7.00
   4 -12   6  136.09    6.90
   4 -12   6  144.79    6.90
   5 -12   6   11.70    2.40
   5 -12   6    8.80    2.00
   5 -12   6   13.50    2.50
   6 -12   6   57.19    4.90
   6 -12   6   55.69    4.40
   6 -12   6   55.39    4.00
   7 -12   6  117.59    6.00
   7 -12   6  115.79    6.60
   7 -12   6  115.49    7.20
  -6 -11   6   19.60    3.30
  -5 -11   6  198.08   10.00
  -4 -11   6  222.38   10.60
  -4 -11   6  230.68    8.00
  -3 -11   6   54.49    3.00
  -3 -11   6   54.79    4.40
  -2 -11   6  229.48    8.50
  -2 -11   6  232.58   10.40
  -1 -11   6  403.96   13.90
  -1 -11   6  416.66   15.50
   0 -11   6  199.68    7.80
   0 -11   6  187.88    8.70
   1 -11   6   39.10    2.90
   1 -11   6   34.20    3.10
   2 -11   6  400.76   14.70
   2 -11   6  392.56   14.10
   3 -11   6  327.57   12.50
   3 -11   6  328.07   12.30
   4 -11   6  220.28    9.30
   4 -11   6  211.48    9.40
   5 -11   6   96.09    5.80
   5 -11   6   92.39    5.40
   6 -11   6  103.49    6.30
   6 -11   6   95.49    5.10
   6 -11   6   87.19    5.50
   7 -11   6   86.49    6.20
   7 -11   6   94.89    5.00
   7 -11   6   94.29    6.00
  -7 -10   6    7.90    2.50
  -6 -10   6   87.89    6.10
  -5 -10   6  108.59    4.40
  -5 -10   6  107.39    6.50
  -4 -10   6   33.80    3.40
  -4 -10   6   38.10    2.30
  -3 -10   6  119.99    6.60
  -3 -10   6  121.49    5.10
  -2 -10   6  367.96   14.20
  -2 -10   6  380.86   12.70
  -1 -10   6  134.39    5.90
  -1 -10   6  151.28    7.10
   0 -10   6   12.80    1.80
   0 -10   6   13.30    2.60
   1 -10   6  186.88    7.70
   2 -10   6  178.38    7.60
   3 -10   6   46.80    3.40
   4 -10   6  154.38    7.10
   4 -10   6  150.18    7.20
   5 -10   6  336.37   13.00
   5 -10   6  325.57   12.70
   6 -10   6  195.48    9.20
   6 -10   6  197.78    8.80
   7 -10   6   29.30    4.10
   7 -10   6   24.70    2.80
   8 -10   6   45.80    3.90
   8 -10   6   51.69    3.40
   8 -10   6   44.40    4.40
   8   9  -6   10.60    2.30
  -8  -9   6    9.00    2.30
   7   9  -6   18.60    2.80
  -7  -9   6   19.70    3.20
   6   9  -6   53.09    3.70
  -6  -9   6   54.19    2.70
  -6  -9   6   54.29    4.50
  -5  -9   6   39.90    2.30
  -5  -9   6   37.60    3.50
  -4  -9   6   11.70    2.30
  -4  -9   6   13.20    1.40
  -3  -9   6   46.00    2.60
  -2  -9   6  167.48    7.70
  -2  -9   6  181.18    6.80
  -1  -9   6    7.00    0.90
  -1  -9   6    7.20    1.30
  -1  -9   6    7.00    1.60
   0  -9   6   67.49    3.60
   1  -9   6  197.58    7.80
   2  -9   6   83.99    4.50
   3  -9   6   55.09    3.70
   3  -9   6   58.89    4.60
   4  -9   6  311.57   11.90
   4  -9   6  327.97   15.40
   5  -9   6  105.29    5.90
   5  -9   6  110.79    5.80
   6  -9   6    9.70    2.00
   6  -9   6    7.60    1.90
   7  -9   6   25.40    2.70
   7  -9   6   31.10    3.50
   8  -9   6   60.79    5.00
   8   8  -6   51.89    4.00
  -8  -8   6   50.19    2.80
  -8  -8   6   55.79    4.50
   7   8  -6    5.60    1.70
  -7  -8   6    6.00    1.20
  -7  -8   6    4.70    1.60
   6   8  -6   56.89    3.80
  -6  -8   6   64.29    4.50
  -6  -8   6   63.19    3.20
   5   8  -6  132.09    6.30
  -5  -8   6  162.18   10.00
  -5  -8   6  149.88    5.70
  -4  -8   6   84.99    3.80
  -4  -8   6   82.59    4.90
  -3  -8   6   19.00    1.60
  -3  -8   6   20.50    2.20
  -2  -8   6   89.79    4.00
  -2  -8   6   89.59    4.70
  -1  -8   6  217.18    7.00
  -1  -8   6  210.88    7.90
   0  -8   6   60.49    3.30
   1  -8   6  243.18    9.10
   2  -8   6  206.08    8.10
   3  -8   6  100.99    5.00
   3  -8   6   93.69    4.80
   4  -8   6    1.90    1.00
   4  -8   6    1.30    1.00
  -5   8  -6  227.78    7.80
   5  -8   6  229.98    9.30
   5  -8   6  229.68    9.60
   6  -8   6   53.69    4.10
   6  -8   6   51.39    3.70
   7  -8   6   31.90    3.40
   7  -8   6   25.40    2.80
   8  -8   6   10.70    2.20
   8  -8   6    9.90    2.30
   9   7  -6  103.99    6.00
  -9  -7   6   96.29    5.70
   8   7  -6   22.00    2.60
  -8  -7   6   19.30    2.80
   7   7  -6   82.19    4.70
  -7  -7   6   73.69    4.80
   6   7  -6  243.08    9.60
  -6  -7   6  251.27   10.10
   5   7  -6   83.39    4.30
  -5  -7   6   84.69    3.80
  -5  -7   6   83.49    4.80
   4   7  -6   14.30    1.60
  -4  -7   6   10.00    1.20
  -4  -7   6    9.10    1.70
  -3  -7   6  503.35   15.90
  -3  -7   6  493.15   16.80
  -2  -7   6  524.35   16.70
  -2  -7   6  553.64   17.10
  -1  -7   6  199.68    7.30
  -1  -7   6  194.98    6.50
   0  -7   6  124.49    5.20
   1  -7   6  974.30   30.00
   2  -7   6  247.78    9.20
   3  -7   6   28.00    2.30
   3  -7   6   29.00    2.40
  -4   7  -6  529.95   17.10
   4  -7   6  578.54   19.00
   4  -7   6  586.64   18.90
   5  -7   6  287.87   11.10
   5  -7   6  299.27   11.40
   6  -7   6   15.20    2.40
   6  -7   6   16.00    2.60
   7  -7   6   37.10    3.20
   7  -7   6   40.00    3.70
   8  -7   6  116.89    6.20
   8  -7   6  125.99    7.10
   9  -7   6   38.10    4.00
   9  -7   6   40.40    4.40
   9   6  -6   30.80    3.00
  -9  -6   6   31.00    3.20
   8   6  -6   37.50    3.20
  -8  -6   6   37.70    3.30
   7   6  -6  524.05   17.80
  -7  -6   6  511.65   17.80
   6   6  -6  288.77   11.20
  -6  -6   6  280.87   10.80
   5   6  -6  149.09    6.10
  -5  -6   6  141.19    6.40
   4   6  -6  121.49    5.10
  -4  -6   6  119.39    5.50
   3   6  -6 1219.08   36.90
  -3  -6   6 1245.68   36.90
  -2  -6   6  190.38    6.70
  -2  -6   6  193.88    7.00
   1   6  -6  810.82   23.30
  -1  -6   6  775.52   24.10
  -1  -6   6  759.42   23.20
   0  -6   6 1360.56   40.70
   1  -6   6  685.53   21.60
   2  -6   6  176.68    6.70
   2  -6   6  176.68    7.00
  -3   6  -6  465.65   14.50
  -3   6  -6  462.95   14.50
   3  -6   6  489.95   15.90
   3  -6   6  481.25   15.70
   4  -6   6  650.83   21.30
   4  -6   6  660.13   21.40
   5  -6   6   86.49    4.90
   5  -6   6   84.99    4.80
   6  -6   6   50.99    3.50
   6  -6   6   48.10    3.60
   7  -6   6  296.77   11.20
   7  -6   6  268.87   11.60
   8  -6   6  270.77   11.70
   8  -6   6  261.27   10.60
   9  -6   6   12.80    2.80
   9  -6   6   13.00    2.30
   9   5  -6   33.40    3.20
  -9  -5   6   33.10    2.90
   8   5  -6  303.77   11.90
  -8  -5   6  309.07   11.20
   7   5  -6  235.88    9.30
  -7  -5   6  226.08    8.90
   6   5  -6   20.40    2.00
  -6  -5   6   20.70    2.00
   5   5  -6  221.08    8.20
  -5  -5   6  218.28    8.30
   4   5  -6 1205.38   36.70
   4   5  -6 1207.38   36.30
   3   5  -6  497.65   15.70
   3   5  -6  507.25   16.10
   2   5  -6  131.59    4.80
  -2  -5   6  120.89    4.80
  -2  -5   6  123.09    5.00
   1   5  -6  927.01   28.60
  -1  -5   6  952.70   28.70
  -1  -5   6  990.50   28.70
  -1  -5   6 1004.60   29.40
   0   5  -6  556.94   15.60
   0  -5   6  492.75   15.50
   0  -5   6  507.75   16.50
  -1   5  -6  235.28    7.70
   1  -5   6  257.87    8.80
  -2   5  -6  478.95   14.60
   2  -5   6  483.55   15.40
   2  -5   6  476.95   15.70
   3  -5   6 1676.13   50.29
   3  -5   6 1690.93   50.39
   4  -5   6  410.16   14.20
   4  -5   6  413.26   14.10
   5  -5   6   37.90    2.80
   5  -5   6   43.30    3.10
   6  -5   6  180.08    7.80
   6  -5   6  202.08    8.60
   7  -5   6  432.26   15.30
   7  -5   6  432.76   16.10
   8  -5   6   67.39    5.00
   8  -5   6   78.69    4.50
   9  -5   6  103.29    5.60
   9  -5   6  114.89    9.80
  10   4  -6    4.20    2.00
   9   4  -6   51.29    4.00
  -9  -4   6   50.79    3.00
   8   4  -6  121.59    6.20
  -8  -4   6  125.09    5.40
   7   4  -6   61.89    3.80
  -7  -4   6   54.39    3.20
   6   4  -6  119.89    5.40
  -6  -4   6  120.49    5.20
   5   4  -6  530.35   17.90
   5   4  -6  530.55   17.30
  -5  -4   6  550.24   17.30
   4   4  -6  353.06   12.20
   4   4  -6  353.66   11.60
   3   4  -6  198.28    7.30
   3   4  -6  197.68    7.20
   2   4  -6  375.76   12.10
  -2  -4   6  369.56   12.10
  -2  -4   6  380.06   11.70
   1   4  -6  385.06   11.80
  -1  -4   6  364.76   12.20
   0   4  -6  268.57    8.40
   0  -4   6  264.37    9.00
   0  -4   6  252.17    8.20
  -1   4  -6  256.87    8.50
   1  -4   6  272.27    8.70
   1  -4   6  269.57    9.20
  -2   4  -6  640.14   20.40
   2  -4   6  714.63   21.20
   2  -4   6  672.63   20.90
   3  -4   6  334.97   11.50
   3  -4   6  341.47   11.70
   4  -4   6   28.90    2.30
   4  -4   6   26.20    2.20
   5  -4   6  273.77   10.40
   5  -4   6  269.97   10.00
   6  -4   6  411.26   14.30
   7  -4   6   34.00    3.20
   7  -4   6   35.80    2.80
   8  -4   6   79.39    5.10
   8  -4   6   71.89    4.40
   9  -4   6  129.79    6.30
  10   3  -6   12.20    2.40
   9   3  -6   44.60    3.60
   8   3  -6  172.78    7.60
  -8  -3   6  162.48    6.00
   7   3  -6   59.99    3.60
  -7  -3   6   54.39    3.70
   6   3  -6  106.39    5.30
   6   3  -6   95.89    4.60
   5   3  -6  269.27    9.30
   5   3  -6  261.77    9.90
   4   3  -6  290.37   10.30
   4   3  -6  293.07    9.70
   3   3  -6  461.55   13.90
   3   3  -6  463.35   14.60
  -3  -3   6  419.26   13.90
   2   3  -6  177.68    5.70
   2   3  -6  177.28    6.30
  -2  -3   6  167.78    6.20
  -2  -3   6  173.18    5.70
   1   3  -6  256.27    8.50
  -1  -3   6  264.17    7.90
  -1  -3   6  247.98    8.40
   0   3  -6   47.70    2.30
   0  -3   6   54.69    2.40
   0  -3   6   58.69    2.70
  -1   3  -6  499.05   15.60
  -1   3  -6  487.15   15.20
   1  -3   6  478.75   15.00
   1  -3   6  503.75   15.60
  -2   3  -6  286.97    9.60
  -2   3  -6  271.07    9.20
   2  -3   6  277.27    9.30
   2  -3   6  279.37    9.60
  -3   3  -6  230.88    8.20
   3  -3   6  220.98    8.20
   3  -3   6  232.68    8.30
  -4   3  -6  420.46   13.80
   4  -3   6  409.36   14.00
   4  -3   6  412.86   13.80
  -5   3  -6   92.09    4.50
   5  -3   6  101.19    4.70
   5  -3   6  105.29    5.00
  -6   3  -6   69.89    3.70
   6  -3   6   65.69    4.80
   6  -3   6   70.69    3.80
   7  -3   6   39.50    3.30
   7  -3   6   36.60    2.80
   8  -3   6   54.79    4.20
   8  -3   6   55.99    3.60
   9  -3   6   28.30    2.60
  10   2  -6    4.70    1.80
   9   2  -6   22.80    3.00
   8   2  -6  332.17   12.50
   7   2  -6   45.30    3.10
   7   2  -6   44.90    3.40
  -7  -2   6   44.60    1.90
  -7  -2   6   44.70    2.10
   6   2  -6   88.69    4.80
   6   2  -6   87.29    4.20
  -6  -2   6   80.79    3.40
   5   2  -6  468.65   14.60
   5   2  -6  407.86   15.10
  -5  -2   6  467.95   13.90
   4   2  -6  188.48    7.40
  -4  -2   6  194.28    6.50
   3   2  -6    4.20    1.00
   3   2  -6    3.50    0.60
  -3  -2   6    5.00    0.80
  -3  -2   6    3.40    0.70
   2   2  -6  476.05   14.90
   2   2  -6  454.05   13.80
  -2  -2   6  468.85   13.90
  -2  -2   6  457.95   14.50
   1   2  -6  987.20   29.10
   1   2  -6  978.10   29.10
  -1  -2   6  943.91   29.00
   0   2  -6  179.98    6.10
   0   2  -6  183.88    6.30
   0  -2   6  165.98    6.20
   0  -2   6  152.78    5.90
  -1   2  -6  239.18    8.30
  -1   2  -6  247.38    8.60
   1  -2   6  247.98    7.90
   1  -2   6  247.38    8.40
  -2   2  -6  501.35   16.60
  -2   2  -6  526.35   17.10
  -2   2  -6  531.95   17.20
   2  -2   6  584.74   17.20
   2  -2   6  573.14   16.90
  -3   2  -6  403.66   13.20
   3  -2   6  395.86   12.90
   3  -2   6  381.36   12.80
  -4   2  -6   50.49    2.90
   4  -2   6   47.80    2.90
   4  -2   6   47.20    2.70
  -5   2  -6   26.20    2.20
   5  -2   6   38.90    2.70
   5  -2   6   36.50    2.40
  -6   2  -6  258.27    9.50
   6  -2   6  246.18    9.20
  -7   2  -6   86.39    4.50
   7  -2   6   94.59    4.60
   7  -2   6   90.79    5.20
  -8   2  -6   13.60    2.00
   8  -2   6   12.90    2.50
   8  -2   6   15.90    2.00
  10   1  -6  132.29    7.00
   9   1  -6  150.88    7.20
   8   1  -6   76.19    4.50
   8   1  -6   71.39    4.80
   7   1  -6   63.79    3.80
   6   1  -6  390.16   13.20
   6   1  -6  384.26   13.90
  -6  -1   6  376.96   11.80
  -6  -1   6  401.06   11.90
   5   1  -6  970.50   28.60
   5   1  -6  968.40   29.50
  -5  -1   6  879.51   27.70
   4   1  -6  198.58    6.70
   4   1  -6  186.38    7.40
  -4  -1   6  199.98    6.90
  -4  -1   6  185.08    6.70
   3   1  -6  206.98    7.60
   3   1  -6  208.68    6.70
  -3  -1   6  199.48    6.70
  -3  -1   6  203.48    7.00
   2   1  -6  882.51   27.30
   2   1  -6  872.41   26.80
  -2  -1   6  929.71   27.00
   1   1  -6  767.22   23.30
   1   1  -6  716.83   22.60
   0   1  -6 1190.78   35.70
  -1   1  -6  751.02   22.70
  -1   1  -6  726.03   21.90
  -1   1  -6  759.82   23.00
   1  -1   6  732.93   21.80
   1  -1   6  723.93   22.50
  -2   1  -6 1367.26   39.60
  -2   1  -6 1247.88   38.70
  -2   1  -6 1313.87   39.40
   2  -1   6 1318.27   39.00
   2  -1   6 1309.37   38.70
  -3   1  -6  179.08    7.20
   3  -1   6  191.08    6.80
   3  -1   6  190.08    6.90
  -4   1  -6  476.25   16.10
   4  -1   6  501.25   15.60
   4  -1   6  473.25   15.80
  -5   1  -6  373.86   13.80
   5  -1   6  418.46   13.40
   5  -1   6  421.96   14.10
  -6   1  -6  323.77   12.00
   6  -1   6  348.57   13.10
   6  -1   6  331.17   11.40
  -7   1  -6   40.80    3.00
   7  -1   6   42.90    2.70
   7  -1   6   44.90    3.50
  -8   1  -6   34.20    2.80
   8  -1   6   34.30    3.30
   8  -1   6   33.70    2.60
  10   0  -6  113.69    6.40
   9   0  -6   87.59    5.10
   9   0  -6   81.39    5.40
   8   0  -6   32.40    2.70
   8   0  -6   25.20    2.90
   7   0  -6  244.18    9.40
   6   0  -6  508.75   16.90
   6   0  -6  524.65   17.70
   5   0  -6  210.48    8.40
   5   0  -6  226.08    7.90
  -5   0   6  211.68    7.10
   4   0  -6  382.46   13.50
   4   0  -6  404.66   12.60
  -4   0   6  403.06   12.70
   3   0  -6  565.54   17.70
   3   0  -6  587.14   16.90
   3   0  -6  568.14   16.60
  -3   0   6  503.55   16.90
  -3   0   6  520.95   16.50
   2   0  -6 1302.97   40.00
   2   0  -6 1370.56   40.20
  -2   0   6 1341.17   40.30
   1   0  -6  340.87   11.40
   1   0  -6  341.07   11.30
   0   0  -6 1091.99   33.30
   0   0  -6 1115.79   33.40
  -1   0  -6 1283.87   38.20
  -1   0  -6 1350.86   39.50
  -1   0  -6 1304.87   39.20
   1   0   6 1266.47   39.10
   1   0   6 1325.67   38.10
  -2   0  -6  378.46   12.30
  -2   0  -6  333.47   11.40
  -2   0  -6  361.66   12.30
   2   0   6  349.17   11.30
   2   0   6  356.96   11.50
  -3   0  -6  352.96   12.40
   3   0   6  354.56   11.70
   3   0   6  353.46   11.50
  -4   0  -6  809.12   25.70
   4   0   6  824.32   24.60
   4   0   6  789.32   25.10
  -5   0  -6  420.76   14.80
   5   0   6  418.36   14.60
   5   0   6  433.56   13.70
  -6   0  -6   87.59    5.00
   6   0   6   98.09    4.10
   6   0   6   91.49    4.90
  -7   0  -6  186.38    8.20
   7   0   6  194.78    7.20
   7   0   6  204.68    8.70
  -8   0  -6  159.38    7.10
   8   0   6  145.19    6.00
   8   0   6  156.78    7.70
  10  -1  -6   57.39    4.30
   9  -1  -6   24.50    2.80
   9  -1  -6   21.00    3.00
   8  -1  -6   93.39    5.60
   8  -1  -6  101.59    5.30
   7  -1  -6  222.58    8.80
   7  -1  -6  221.18   10.40
   6  -1  -6  288.27   10.30
   6  -1  -6  288.17   11.00
   5  -1  -6   38.50    2.40
   5  -1  -6   38.20    2.80
  -5   1   6   36.30    1.90
   4  -1  -6  520.25   15.80
   4  -1  -6  502.55   17.00
   4  -1  -6  517.75   16.10
  -4   1   6  517.95   15.90
  -4   1   6  512.15   16.00
   3  -1  -6 1552.74   44.40
   3  -1  -6 1527.45   45.60
   3  -1  -6 1487.15   45.20
  -3   1   6 1503.35   45.00
   2  -1  -6   34.90    2.20
   2  -1  -6   36.80    2.40
   2  -1  -6   39.10    1.60
   1  -1  -6  355.46   11.90
   1  -1  -6  347.27   11.80
   0  -1  -6  470.95   15.00
   0  -1  -6  441.06   14.70
   0  -1  -6  433.36   13.40
  -1  -1  -6  513.25   16.20
  -1  -1  -6  492.05   16.40
  -1  -1  -6  483.95   15.40
   1   1   6  502.75   15.00
   1   1   6  483.45   15.70
  -2  -1  -6  444.96   15.20
  -2  -1  -6  454.25   15.50
   2   1   6  462.85   14.20
  -3  -1  -6  458.15   15.50
  -3  -1  -6  476.95   15.80
   3   1   6  426.76   14.50
  -4  -1  -6  300.57   11.40
   4   1   6  296.77   10.60
   4   1   6  304.37    9.90
  -5  -1  -6   59.29    5.60
   5   1   6   52.59    2.50
   5   1   6   48.90    3.20
  -6  -1  -6   85.99    4.80
   6   1   6   76.89    4.50
   6   1   6   77.89    3.40
  -7  -1  -6  210.88    9.00
   7   1   6  210.88    9.10
   7   1   6  203.68    7.20
  -8  -1  -6  112.79    6.00
   8   1   6  116.39    6.40
  10  -2  -6   13.30    2.60
  10  -2  -6   11.60    2.50
   9  -2  -6   21.40    3.10
   9  -2  -6   14.80    2.50
   8  -2  -6   19.30    2.20
   8  -2  -6   19.00    2.40
   7  -2  -6  157.88    6.80
   7  -2  -6  151.38    7.20
   6  -2  -6   13.90    1.90
   6  -2  -6   11.50    2.00
   5  -2  -6   77.99    3.00
   5  -2  -6   69.69    4.10
   5  -2  -6   77.89    3.70
  -5   2   6   76.29    4.20
   4  -2  -6  147.09    6.20
   4  -2  -6  144.49    5.20
  -4   2   6  133.29    5.40
   3  -2  -6    7.50    1.00
   3  -2  -6    4.80    1.10
   3  -2  -6   10.90    1.70
   2  -2  -6  338.77   10.60
   2  -2  -6  344.57   11.60
   1  -2  -6  869.41   27.50
   1  -2  -6  872.91   26.00
   1  -2  -6  913.81   27.50
   0  -2  -6   82.19    4.00
   0  -2  -6   75.29    4.10
   0  -2  -6   76.79    3.00
  -1  -2  -6   13.20    1.50
  -1  -2  -6   14.00    1.10
  -1  -2  -6   12.00    1.90
   1   2   6   13.10    1.00
  -2  -2  -6  102.19    5.00
  -2  -2  -6   98.09    5.20
   2   2   6  102.19    4.10
   2   2   6  102.99    3.90
  -3  -2  -6  432.66   15.20
  -3  -2  -6  443.46   15.10
   3   2   6  417.36   13.90
   3   2   6  421.56   13.30
   4   2   6   25.60    2.10
   4   2   6   25.40    1.50
  -5  -2  -6    5.70    1.60
   5   2   6    4.70    1.30
   5   2   6    5.90    0.80
  -6  -2  -6  196.18    8.80
   6   2   6  198.18    8.40
  -7  -2  -6   64.19    4.40
   7   2   6   56.29    4.10
  10  -3  -6   25.00    3.60
  10  -3  -6   26.70    2.90
   9  -3  -6    2.90    1.20
   9  -3  -6    2.20    1.20
   8  -3  -6    9.60    1.90
   8  -3  -6   11.70    2.10
   7  -3  -6   95.39    5.00
   7  -3  -6  102.09    5.50
   6  -3  -6  157.98    6.50
   6  -3  -6  147.39    6.80
  -6   3   6  142.19    5.00
   5  -3  -6  125.89    5.90
   5  -3  -6  135.19    5.50
   5  -3  -6  127.49    4.70
  -5   3   6  117.19    4.80
   4  -3  -6   58.29    3.50
   4  -3  -6   55.19    2.90
   4  -3  -6   59.09    3.00
   3  -3  -6  157.78    6.20
   3  -3  -6  150.78    5.60
   3  -3  -6  155.88    6.50
   2  -3  -6  168.18    6.80
   2  -3  -6  170.58    7.00
   1  -3  -6   19.00    1.20
   1  -3  -6   22.60    2.00
   1  -3  -6   21.10    2.10
   0  -3  -6  238.88    9.40
   0  -3  -6  249.58    9.20
   0  -3  -6  233.88    7.90
  -1  -3  -6  181.58    7.60
  -1  -3  -6  187.58    8.00
   1   3   6  195.38    6.40
  -2  -3  -6  142.79    6.80
  -2  -3  -6  131.29    6.30
   2   3   6  144.19    5.40
   2   3   6  144.09    5.00
  -3  -3  -6    5.20    2.10
   3   3   6   11.80    0.90
   3   3   6   14.20    1.50
  -4  -3  -6  100.79    5.80
  -4  -3  -6  103.09    5.70
   4   3   6  109.69    4.90
  -5  -3  -6   58.29    4.30
   5   3   6   55.09    3.50
  -6  -3  -6   31.20    3.20
   6   3   6   28.00    2.60
  -7  -3  -6   20.50    3.10
   7   3   6   22.80    3.00
  10  -4  -6   11.40    2.30
  10  -4  -6   11.60    2.50
   9  -4  -6   17.50    2.80
   9  -4  -6   19.30    2.80
   8  -4  -6   78.49    4.80
   8  -4  -6   85.79    5.30
   7  -4  -6  173.78    8.00
   7  -4  -6  172.88    7.60
   6  -4  -6   60.99    2.60
   6  -4  -6   65.09    3.70
   6  -4  -6   54.19    3.80
  -6   4   6   59.39    2.70
   5  -4  -6   50.99    2.70
   5  -4  -6   56.19    3.30
   5  -4  -6   52.49    3.50
   4  -4  -6  422.26   13.70
   4  -4  -6  397.96   14.30
   4  -4  -6  405.96   13.50
   3  -4  -6   84.59    4.20
   3  -4  -6   83.49    3.70
   3  -4  -6   80.29    4.30
   2  -4  -6   61.49    3.60
   2  -4  -6   55.79    3.50
   1  -4  -6  677.43   22.20
   1  -4  -6  698.33   22.60
   0  -4  -6  474.25   16.10
   0  -4  -6  471.75   16.60
  -1  -4  -6   11.00    2.10
  -1  -4  -6    9.10    1.60
   1   4   6   10.70    1.00
  -2  -4  -6  142.39    6.70
  -2  -4  -6  150.38    7.10
   2   4   6  133.99    4.60
   2   4   6  130.19    4.70
  -3  -4  -6  266.77   10.70
  -3  -4  -6  254.37   10.90
   3   4   6  269.57    9.50
  -4  -4  -6   92.99    5.60
  -4  -4  -6   87.39    5.30
   4   4   6   87.99    4.50
  -5  -4  -6   21.20    2.70
  -5  -4  -6   21.60    3.30
   5   4   6   20.80    2.30
  -6  -4  -6  103.49    6.40
  -6  -4  -6   97.29    6.10
   6   4   6   98.39    5.40
  10  -5  -6   12.10    2.50
  10  -5  -6   13.20    2.80
   9  -5  -6   90.79    5.80
   9  -5  -6   94.29    5.60
   8  -5  -6  171.88    8.30
   8  -5  -6  177.88    8.10
   7  -5  -6   57.79    4.10
   6  -5  -6  139.19    6.20
   6  -5  -6  132.99    7.30
   6  -5  -6  127.99    5.00
   5  -5  -6  508.15   16.90
   5  -5  -6  500.75   17.50
   5  -5  -6  512.25   16.40
   4  -5  -6  289.07   10.20
   4  -5  -6  284.67   11.10
   4  -5  -6  299.47   10.60
   3  -5  -6   30.20    2.10
   3  -5  -6   30.60    2.60
   3  -5  -6   27.10    2.50
   2  -5  -6  535.55   18.00
   2  -5  -6  531.65   18.20
   1  -5  -6  537.65   18.60
   1  -5  -6  581.54   19.30
   0  -5  -6   68.39    4.60
   0  -5  -6   82.59    4.50
  -1  -5  -6  207.08    9.30
  -1  -5  -6  213.88    9.10
   1   5   6  209.38    7.00
  -2  -5  -6  560.44   20.00
  -2  -5  -6  553.34   19.20
  -3  -5  -6  376.76   15.10
  -3  -5  -6  407.46   14.90
  -4  -5  -6   34.40    3.60
  -4  -5  -6   37.30    3.50
   4   5   6   37.60    2.80
  -5  -5  -6  193.18    9.30
  -5  -5  -6  176.08    9.10
   5   5   6  188.78    8.00
  -6  -5  -6  120.39    7.30
  -6  -5  -6  124.59    7.40
   6   5   6  130.49    6.40
   9  -6  -6  106.49    6.40
   9  -6  -6  114.49    6.50
   8  -6  -6   92.79    5.50
   8  -6  -6   89.59    5.50
   7  -6  -6   56.59    4.10
   7  -6  -6   62.19    4.10
   7  -6  -6   54.59    2.60
   6  -6  -6  248.38    9.70
   6  -6  -6  239.08    8.60
   6  -6  -6  239.18   10.00
   5  -6  -6   64.69    3.60
   5  -6  -6   57.79    3.60
   4  -6  -6  123.09    5.90
   4  -6  -6  129.39    5.50
   4  -6  -6  125.79    6.20
   3  -6  -6  280.97   10.90
   3  -6  -6  281.47   10.90
   2  -6  -6  539.65   18.70
   2  -6  -6  537.15   18.40
   1  -6  -6  172.58    7.60
   1  -6  -6  179.08    8.60
   0  -6  -6   79.59    6.90
   0  -6  -6   66.69    4.70
  -1  -6  -6  479.55   17.70
  -1  -6  -6  486.05   16.90
   1   6   6  468.85   14.60
  -2  -6  -6  522.55   18.40
  -2  -6  -6  522.05   19.30
  -3  -6  -6   54.19    4.10
  -3  -6  -6   48.80    4.30
  -4  -6  -6  295.77   13.10
  -4  -6  -6  311.17   12.70
  -5  -6  -6  226.48   11.40
   5   6   6  227.38    9.40
   9  -7  -6    2.10    1.70
   9  -7  -6    1.10    1.50
   8  -7  -6    3.20    1.60
   8  -7  -6    0.90    1.30
   7  -7  -6   59.39    4.20
   7  -7  -6   52.59    2.80
   7  -7  -6   52.69    4.10
   6  -7  -6   39.60    3.40
   6  -7  -6   28.60    2.80
   6  -7  -6   29.20    2.40
   5  -7  -6   30.20    2.70
   5  -7  -6   27.00    2.70
   5  -7  -6   28.50    2.80
   4  -7  -6  129.09    5.80
   4  -7  -6  123.79    6.40
   4  -7  -6  133.09    6.40
   2  -7  -6  232.08    9.90
   2  -7  -6  229.08    9.90
   1  -7  -6   29.00    2.80
   1  -7  -6   34.40    3.30
   0  -7  -6  217.18    9.30
   0  -7  -6  211.08    9.90
  -1  -7  -6  291.57   12.60
  -1  -7  -6  299.47   11.90
  -2  -7  -6   21.30    2.70
  -2  -7  -6   23.90    3.50
  -3  -7  -6   81.99    6.00
  -3  -7  -6   89.79    5.60
  -4  -7  -6  240.18   11.10
   8  -8  -6   15.60    2.80
   8  -8  -6   22.60    2.90
   7  -8  -6   29.90    3.20
   7  -8  -6   29.60    3.20
   7  -8  -6   26.70    2.40
   6  -8  -6   12.90    2.10
   6  -8  -6   10.40    2.10
   6  -8  -6   11.60    2.10
   5  -8  -6   62.99    4.20
   5  -8  -6   64.59    4.40
   5  -8  -6   57.99    4.20
   4  -8  -6   77.19    4.90
   4  -8  -6   79.59    5.20
   4  -8  -6   82.39    5.00
   3  -8  -6   88.09    5.40
   3  -8  -6   87.39    5.10
   2  -8  -6    8.40    2.00
   2  -8  -6    7.70    2.20
   1  -8  -6   55.09    3.90
   1  -8  -6   51.79    4.40
   0  -8  -6   89.09    5.80
   0  -8  -6   79.39    5.00
  -1  -8  -6   35.00    3.30
  -1  -8  -6   32.30    3.80
  -2  -8  -6   16.10    3.10
  -2  -8  -6   20.40    3.10
  -3  -8  -6   23.00    3.40
  -3  -8  -6   18.10    3.60
   7  -9  -6   30.10    3.20
   7  -9  -6   26.30    3.50
   7  -9  -6   31.60    2.80
   6  -9  -6   54.09    4.20
   6  -9  -6   58.99    4.40
   6  -9  -6   58.39    4.00
   5  -9  -6   13.20    2.50
   5  -9  -6   11.90    2.40
   5  -9  -6   13.80    2.50
   4  -9  -6    3.50    1.80
   4  -9  -6    5.70    1.80
   4  -9  -6    8.20    1.90
   3  -9  -6   36.20    3.30
   3  -9  -6   38.10    3.90
   2  -9  -6   29.50    3.10
   2  -9  -6   29.30    3.30
   1  -9  -6    5.30    1.70
   1  -9  -6    3.30    1.80
   0  -9  -6   42.80    3.70
   0  -9  -6   48.40    4.40
  -1  -9  -6   60.09    4.60
  -1  -9  -6   65.59    5.40
  -2  -9  -6   60.19    4.60
  -2  -9  -6   50.19    4.90
   6 -10  -6    2.70    1.80
   6 -10  -6    1.70    1.90
   6 -10  -6    3.50    1.80
   5 -10  -6   57.09    4.50
   5 -10  -6   55.69    4.30
   5 -10  -6   56.39    4.40
   4 -10  -6  128.89    6.50
   4 -10  -6  126.59    7.00
   4 -10  -6  122.39    6.70
   3 -10  -6  123.79    6.60
   3 -10  -6  111.29    6.80
   2 -10  -6    6.90    1.90
   2 -10  -6    5.40    1.80
   1 -10  -6   50.29    4.20
   1 -10  -6   50.19    4.70
   0 -10  -6  104.89    7.10
   0 -10  -6  115.09    6.60
  -1 -10  -6   66.89    5.60
  -1 -10  -6   60.99    5.80
  -1 -15   7   83.89    6.40
  -1 -15   7   92.19    4.80
   0 -15   7  261.27    9.80
   0 -15   7  219.98   11.30
   1 -15   7   29.60    3.60
   1 -15   7   26.40    2.80
   2 -15   7   23.40    3.70
   2 -15   7   23.10    3.10
   3 -15   7  113.39    7.70
   3 -15   7  108.59    7.20
  -3 -14   7    6.90    1.60
  -3 -14   7    7.60    2.40
  -3 -14   7    6.40    1.60
  -2 -14   7   36.90    4.10
  -1 -14   7  133.39    6.20
  -1 -14   7  132.69    7.90
   0 -14   7    5.80    1.80
   0 -14   7    7.50    2.10
   1 -14   7   16.60    2.60
   1 -14   7   18.70    3.20
   2 -14   7   74.59    5.30
   2 -14   7   64.69    4.50
   3 -14   7   66.69    4.90
   3 -14   7   71.59    4.70
   4 -14   7   -0.10    1.20
   4 -14   7    0.20    1.20
   5 -14   7   18.20    3.10
   5 -14   7   18.00    3.50
   5 -14   7   21.70    3.40
  -4 -13   7   51.99    2.90
  -3 -13   7   31.80    3.80
  -3 -13   7   30.60    2.50
  -2 -13   7   18.90    3.20
  -2 -13   7   15.40    2.10
  -1 -13   7   40.80    3.10
  -1 -13   7   46.90    4.30
   0 -13   7   21.70    3.30
   0 -13   7   17.80    2.50
   1 -13   7   18.60    2.60
   1 -13   7   16.80    2.80
   2 -13   7   23.20    3.30
   2 -13   7   22.20    2.60
   3 -13   7   60.69    4.40
   3 -13   7   58.09    4.10
   4 -13   7   25.40    3.60
   4 -13   7   27.10    3.00
   4 -13   7   29.30    3.20
   5 -13   7   39.30    4.60
   5 -13   7   36.80    4.10
   5 -13   7   34.10    3.30
   6 -13   7   27.80    4.20
   6 -13   7   27.90    3.10
   6 -13   7   26.20    2.90
  -5 -12   7   68.59    3.30
  -5 -12   7   71.89    5.70
  -4 -12   7  110.89    4.80
  -4 -12   7  105.89    6.90
  -3 -12   7    1.20    1.00
  -3 -12   7    1.50    1.30
  -2 -12   7   84.59    5.70
  -2 -12   7   99.69    4.70
  -1 -12   7  284.87   10.80
  -1 -12   7  304.97   12.50
   0 -12   7  113.39    5.70
   0 -12   7  124.29    6.80
   1 -12   7    1.40    1.10
   1 -12   7    1.20    1.10
   2 -12   7  251.47   10.00
   2 -12   7  237.68   10.40
   3 -12   7  213.38    9.20
   3 -12   7  199.58    8.90
   4 -12   7   16.10    2.70
   4 -12   7   12.90    2.40
   4 -12   7   15.00    2.70
   5 -12   7   73.19    4.60
   5 -12   7   67.59    5.10
   5 -12   7   69.79    4.70
   6 -12   7   53.89    6.20
   6 -12   7   52.09    4.70
   6 -12   7   46.90    3.70
  -6 -11   7  102.19    5.40
  -6 -11   7  104.69    6.90
  -5 -11   7  174.78    6.70
  -5 -11   7  183.78    9.30
  -4 -11   7   79.89    5.50
  -4 -11   7   76.49    3.80
  -3 -11   7  113.09    6.60
  -3 -11   7  111.79    5.00
  -2 -11   7  566.94   18.60
  -2 -11   7  574.64   20.40
  -1 -11   7  211.28    9.40
  -1 -11   7  202.88    8.10
   0 -11   7    1.30    1.20
   0 -11   7    2.00    1.00
   1 -11   7  272.27   10.50
   2 -11   7  308.97   11.70
   3 -11   7  164.18    7.60
   3 -11   7  166.98    7.60
   4 -11   7   99.69    5.60
   4 -11   7  101.99    5.80
   5 -11   7  259.07   10.80
   5 -11   7  255.77   11.10
   6 -11   7   43.60    4.20
   6 -11   7   49.70    3.80
   7 -11   7   12.60    2.50
  -7 -10   7  116.89    7.10
  -6 -10   7  319.67   13.30
  -6 -10   7  308.17   10.50
  -5 -10   7   73.79    3.60
  -5 -10   7   67.79    5.00
  -4 -10   7   42.40    3.80
  -4 -10   7   37.80    2.50
  -3 -10   7  443.46   14.70
  -3 -10   7  440.66   16.40
  -2 -10   7  482.75   17.20
  -2 -10   7  459.85   15.60
  -1 -10   7   18.00    2.20
  -1 -10   7   17.80    1.80
   0 -10   7  215.38    8.50
   1 -10   7  687.93   22.40
   2 -10   7  226.88    9.20
   3 -10   7    5.10    1.60
   3 -10   7    4.60    1.30
   4 -10   7  132.99    6.60
   4 -10   7  135.29    6.60
   5 -10   7  313.37   12.60
   5 -10   7  312.47   12.30
   6 -10   7   71.99    4.80
   6 -10   7   82.99    5.50
   7 -10   7  106.49    6.10
   7 -10   7  101.49    6.50
   8 -10   7  173.68    8.60
   8 -10   7  180.38    9.40
   8   9  -7   23.10    3.20
  -8  -9   7   23.00    3.50
   7   9  -7  113.29    6.10
  -7  -9   7  111.89    6.70
  -7  -9   7  112.89    4.80
   6   9  -7   82.89    4.70
  -6  -9   7   81.69    5.40
  -6  -9   7   77.79    3.80
  -5  -9   7    7.10    1.90
  -5  -9   7   10.70    1.50
  -4  -9   7  111.99    6.10
  -4  -9   7  109.39    4.80
  -3  -9   7  327.97   14.10
  -3  -9   7  337.07   11.50
  -2  -9   7  126.59    5.50
  -1  -9   7   92.69    4.50
   0  -9   7  166.58    6.90
   1  -9   7  249.48    9.50
   2  -9   7   48.30    3.30
   3  -9   7  490.55   17.00
   3  -9   7  494.15   16.90
   4  -9   7  123.29    6.30
   4  -9   7  125.99    6.20
   5  -9   7   90.99    5.10
   5  -9   7   83.69    5.20
   6  -9   7   23.00    3.30
   6  -9   7   24.50    2.70
   7  -9   7   71.59    4.70
   7  -9   7   66.59    5.10
   8  -9   7   68.69    4.80
   8   8  -7   19.40    2.80
  -8  -8   7   18.20    2.00
  -8  -8   7   21.00    3.10
   7   8  -7   16.40    2.50
  -7  -8   7   21.10    3.00
  -7  -8   7   15.20    1.80
   6   8  -7    0.00    0.70
  -6  -8   7    1.70    0.80
  -6  -8   7    1.30    1.20
   5   8  -7   15.40    2.20
  -5  -8   7   12.90    1.50
  -5  -8   7   12.70    2.60
  -4  -8   7  189.48    7.20
  -4  -8   7  185.18    8.20
  -3  -8   7   37.40    3.00
  -3  -8   7   39.80    2.50
  -2  -8   7  138.49    5.70
  -2  -8   7  134.39    5.50
  -1  -8   7   70.49    3.70
  -1  -8   7   72.69    2.80
   0  -8   7  485.85   16.10
   1  -8   7   56.49    3.30
   2  -8   7  179.68    7.40
   3  -8   7  196.18    8.30
   3  -8   7  210.18    8.20
   4  -8   7  119.79    5.90
   4  -8   7  117.89    5.90
   5  -8   7    0.10    0.90
   5  -8   7   -0.30    0.80
   6  -8   7   51.19    3.80
   6  -8   7   51.89    4.10
   7  -8   7   35.40    3.20
   7  -8   7   31.20    3.40
   8  -8   7    0.50    1.20
   8  -8   7   -0.40    1.20
   9   7  -7   41.30    4.10
  -9  -7   7   36.90    3.70
   8   7  -7    7.60    1.80
  -8  -7   7    6.30    1.90
   7   7  -7   74.09    4.40
  -7  -7   7   74.29    4.60
   6   7  -7   92.09    4.90
  -6  -7   7  109.69    5.60
   5   7  -7   24.40    2.10
  -5  -7   7   29.10    2.50
   4   7  -7  246.88    9.00
  -4  -7   7  242.58    9.60
  -4  -7   7  244.08    8.80
  -3  -7   7  170.08    6.60
  -2  -7   7  214.08    7.60
  -2  -7   7  223.98    8.10
  -1  -7   7  235.48    7.70
  -1  -7   7  238.68    8.60
   0  -7   7   78.49    3.90
   1  -7   7   28.80    2.20
   2  -7   7   50.09    3.20
   2  -7   7   52.99    3.10
  -3   7  -7  101.49    3.60
   3  -7   7   97.09    4.80
   3  -7   7   97.49    4.90
  -4   7  -7   65.99    2.90
  -4   7  -7   57.59    2.80
   4  -7   7   67.59    4.00
   5  -7   7   23.10    2.40
   5  -7   7   23.00    2.90
   6  -7   7    8.10    1.90
   6  -7   7    3.50    1.50
   7  -7   7   43.80    3.40
   7  -7   7   37.90    3.60
   8  -7   7    9.80    2.20
   8  -7   7   11.90    2.20
   9   6  -7   23.40    3.20
  -9  -6   7   21.60    2.70
   8   6  -7  162.58    7.60
  -8  -6   7  174.28    7.50
   7   6  -7  259.97   10.30
  -7  -6   7  276.87   10.50
   6   6  -7   89.69    4.70
  -6  -6   7   84.59    4.70
   5   6  -7  209.08    7.80
  -5  -6   7  194.38    8.10
   4   6  -7  372.76   12.40
   3   6  -7  208.18    7.60
   2   6  -7  175.08    6.20
  -2  -6   7  166.08    6.10
  -2  -6   7  162.18    6.40
   1   6  -7  805.72   23.70
  -1  -6   7  783.42   24.30
  -1  -6   7  784.62   24.60
   0   6  -7 1305.57   38.50
   0  -6   7 1340.27   38.50
   0  -6   7 1315.37   39.80
   1  -6   7  121.29    5.30
  -2   6  -7  145.69    4.80
   2  -6   7  147.99    5.70
   2  -6   7  120.39    5.70
  -3   6  -7  587.04   17.40
   3  -6   7  555.04   18.50
   3  -6   7  558.44   18.60
   4  -6   7   82.09    4.50
   4  -6   7   88.69    4.60
   5  -6   7   16.10    2.30
   5  -6   7   15.80    2.30
   6  -6   7  227.78    9.20
   6  -6   7  217.58    9.50
   7  -6   7  188.38    8.80
   7  -6   7  188.48    8.20
   8  -6   7   33.00    3.00
   8  -6   7   30.70    3.20
   9   5  -7  146.89    7.30
  -9  -5   7  150.08    6.30
   8   5  -7  223.98    9.40
  -8  -5   7  232.78    8.80
   7   5  -7    8.10    1.60
  -7  -5   7   12.60    1.90
   6   5  -7   55.79    3.30
  -6  -5   7   52.59    3.30
   5   5  -7  508.05   16.70
   5   5  -7  524.85   17.40
  -5  -5   7  514.15   16.90
   4   5  -7  728.03   22.50
   4   5  -7  735.63   23.20
   3   5  -7  229.48    8.30
   3   5  -7  228.58    7.80
   2   5  -7  425.86   13.30
  -2  -5   7  397.66   13.60
   1   5  -7  919.01   27.00
  -1  -5   7  891.01   26.70
  -1  -5   7  880.01   26.80
  -1  -5   7  912.91   27.60
   0   5  -7  592.34   18.20
   0  -5   7  613.44   18.10
   0  -5   7  594.94   19.10
  -1   5  -7  372.26   11.20
   1  -5   7  350.16   11.50
   1  -5   7  345.57   12.10
  -2   5  -7 1514.55   44.60
   2  -5   7 1490.75   45.20
   2  -5   7 1547.25   45.70
   3  -5   7  608.34   19.60
   3  -5   7  613.14   19.80
   4  -5   7  116.59    5.40
   4  -5   7  109.29    5.30
   5  -5   7  154.58    7.00
   5  -5   7  158.38    6.80
   6  -5   7  593.04   19.80
   6  -5   7  590.74   20.30
   7  -5   7   92.49    5.40
   7  -5   7   89.19    4.90
   8  -5   7   43.40    3.80
   8  -5   7   46.00    3.40
   9   4  -7  198.78    8.80
   8   4  -7   68.79    4.30
  -8  -4   7   64.79    3.50
  -7  -4   7   13.70    1.80
   6   4  -7  308.47   11.10
   6   4  -7  312.67   11.90
  -6  -4   7  324.17   10.90
   5   4  -7  744.83   24.30
   5   4  -7  771.22   23.60
   4   4  -7  161.08    6.50
   4   4  -7  154.88    5.80
   3   4  -7  410.46   12.90
   3   4  -7  411.16   13.60
   2   4  -7  859.41   26.40
  -2  -4   7  833.92   25.10
   1   4  -7  360.06   11.30
  -1  -4   7  326.97   11.00
  -1  -4   7  343.17   10.60
  -1  -4   7  358.66   11.70
   0   4  -7  319.77   10.30
   0  -4   7  316.37   10.10
   0  -4   7  313.17   10.80
  -1   4  -7 1105.49   33.30
   1  -4   7 1135.79   34.00
   1  -4   7 1123.89   33.30
  -2   4  -7 1224.08   37.00
   2  -4   7 1265.47   37.70
  -3   4  -7  257.77    8.80
   3  -4   7  248.38    9.20
   3  -4   7  249.97    9.10
   4  -4   7  107.99    5.10
   4  -4   7  106.39    5.00
   5  -4   7  557.64   18.50
   5  -4   7  558.94   18.80
   6  -4   7  214.68    8.90
   6  -4   7  207.58    8.50
   7  -4   7   58.59    4.10
   7  -4   7   50.89    3.50
   8  -4   7  197.88    8.50
   8  -4   7  206.28    9.40
  10   3  -7   71.49    4.90
   9   3  -7   45.40    3.60
   8   3  -7   12.40    1.90
  -8  -3   7   12.90    1.40
  -8  -3   7   10.70    1.20
   7   3  -7  180.98    8.20
   7   3  -7  177.98    7.40
   6   3  -7  221.98    9.30
   6   3  -7  234.98    8.60
  -6  -3   7  238.08    8.20
   5   3  -7   15.90    1.80
   5   3  -7   15.50    1.50
   4   3  -7  201.48    6.90
   4   3  -7  191.78    7.60
   3   3  -7  729.03   22.90
   3   3  -7  724.63   21.90
  -3  -3   7  742.63   22.00
   2   3  -7  707.53   22.00
  -2  -3   7  713.43   21.10
   1   3  -7   52.49    2.60
  -1  -3   7   50.49    1.90
  -1  -3   7   53.99    2.80
   0   3  -7  499.05   16.30
   0  -3   7  551.04   15.70
   0  -3   7  497.25   16.20
   0  -3   7  544.75   16.70
  -1   3  -7  704.43   22.10
  -1   3  -7  711.03   22.20
   1  -3   7  707.23   22.10
   1  -3   7  710.43   21.30
  -2   3  -7  128.99    5.10
  -2   3  -7  130.79    5.30
   2  -3   7  121.79    5.20
   2  -3   7  118.09    4.80
  -3   3  -7  372.16   12.60
  -3   3  -7  361.06   12.40
   3  -3   7  374.46   12.40
   3  -3   7  376.16   12.60
  -4   3  -7  458.45   15.20
   4  -3   7  443.46   15.10
   4  -3   7  457.55   15.20
  -5   3  -7  243.78    8.90
   5  -3   7  234.28    9.20
   5  -3   7  222.48    8.80
  -6   3  -7    5.90    1.30
   6  -3   7    6.10    1.50
   6  -3   7    8.10    1.60
   7  -3   7  135.89    6.20
   7  -3   7  134.79    6.80
   8  -3   7   93.79    5.00
   8  -3   7  108.89    6.10
  10   2  -7   59.69    4.40
   9   2  -7   63.19    4.30
   8   2  -7   33.70    2.80
   8   2  -7   37.20    3.40
   7   2  -7   27.60    2.70
   7   2  -7   31.00    2.40
  -7  -2   7   26.50    1.60
  -7  -2   7   25.00    1.60
   6   2  -7  190.68    8.10
   6   2  -7  192.88    7.30
  -6  -2   7  182.58    6.40
   5   2  -7  116.39    4.80
   5   2  -7  124.49    5.60
  -5  -2   7  109.49    4.40
   4   2  -7  152.18    6.30
   4   2  -7  146.49    5.30
   3   2  -7  194.98    6.30
   3   2  -7  194.18    7.40
  -3  -2   7  193.88    6.50
   2   2  -7  784.62   24.30
   1   2  -7  381.96   12.50
   1   2  -7  381.76   12.50
   0   2  -7  553.14   18.10
   0   2  -7  553.94   17.90
   0  -2   7  616.04   18.20
  -1   2  -7  462.55   15.00
  -1   2  -7  456.85   14.80
   1  -2   7  454.25   14.80
   1  -2   7  466.65   14.00
  -2   2  -7  176.68    6.70
  -2   2  -7  187.48    6.90
  -2   2  -7  165.58    6.10
   2  -2   7  170.48    6.10
   2  -2   7  172.38    6.60
  -3   2  -7  110.69    5.10
  -3   2  -7  110.79    5.00
   3  -2   7  114.99    4.70
   3  -2   7  116.69    4.90
  -4   2  -7   61.79    3.50
   4  -2   7   62.89    3.40
   4  -2   7   59.39    3.30
  -5   2  -7   31.00    2.60
   5  -2   7   34.50    2.70
   5  -2   7   34.60    2.50
   6  -2   7  132.49    6.30
   6  -2   7  132.69    5.80
  -7   2  -7   70.19    4.20
   7  -2   7   77.59    4.70
  -8   2  -7   22.10    2.50
   8  -2   7   22.20    3.10
   8  -2   7   24.00    2.20
  10   1  -7  122.29    6.60
   9   1  -7   62.59    4.60
   9   1  -7   58.99    4.10
   8   1  -7   15.40    2.70
   8   1  -7   16.70    2.40
   7   1  -7  231.88    9.00
   7   1  -7  233.08    9.80
   6   1  -7  356.16   12.90
   6   1  -7  351.56   12.00
  -6  -1   7  344.77   11.00
   5   1  -7  125.59    5.70
   5   1  -7  128.89    5.00
  -5  -1   7  110.99    4.50
   4   1  -7  167.18    5.80
   4   1  -7  156.18    6.70
  -4  -1   7  166.48    5.90
  -4  -1   7  170.08    6.00
   3   1  -7 1137.29   33.30
   3   1  -7 1144.99   34.80
  -3  -1   7 1142.99   33.50
   2   1  -7  126.69    5.30
   2   1  -7  127.09    4.90
   1   1  -7    3.60    0.80
   1   1  -7    3.20    0.80
   0   1  -7  244.98    8.60
   0   1  -7  235.28    8.60
  -1   1  -7  440.56   14.50
  -1   1  -7  437.06   14.70
  -1   1  -7  424.26   13.40
   1  -1   7  447.76   13.30
   1  -1   7  457.05   14.30
  -2   1  -7   17.70    1.70
  -2   1  -7   15.50    1.60
  -2   1  -7   14.70    1.20
   2  -1   7   11.70    1.10
   2  -1   7   11.20    1.20
  -3   1  -7   77.39    4.00
  -3   1  -7   75.09    4.00
   3  -1   7   65.79    3.30
   3  -1   7   71.39    3.50
  -4   1  -7  298.67   11.20
   4  -1   7  304.87   10.50
   4  -1   7  313.77   10.80
  -5   1  -7  276.47   10.40
   5  -1   7  269.37    9.60
   5  -1   7  270.27   10.20
  -6   1  -7    5.10    1.50
   6  -1   7    5.60    1.40
   6  -1   7    5.80    1.20
  -7   1  -7   54.79    3.80
   7  -1   7   64.09    3.40
   7  -1   7   58.39    4.10
  -8   1  -7   91.49    5.00
   8  -1   7   81.89    5.30
  10   0  -7  104.39    5.90
   9   0  -7   21.10    2.70
   9   0  -7   14.20    2.30
   8   0  -7   82.19    4.50
   8   0  -7   75.89    5.00
   7   0  -7  811.12   25.50
   7   0  -7  786.32   26.30
   6   0  -7  255.07    9.20
   6   0  -7  255.27   10.10
  -6   0   7  248.28    8.10
   5   0  -7   93.49    4.00
   5   0  -7   87.19    4.60
  -5   0   7   88.69    3.70
   4   0  -7  339.97   10.70
   4   0  -7  346.37   12.00
  -4   0   7  318.37   11.00
  -4   0   7  335.27   10.80
   3   0  -7  792.12   23.30
   3   0  -7  759.82   24.10
   3   0  -7  738.03   22.50
   2   0  -7  256.67    8.80
   2   0  -7  245.28    9.10
   1   0  -7 1142.99   35.30
   1   0  -7 1195.58   35.50
   0   0  -7  547.35   17.50
   0   0  -7  534.35   17.50
  -1   0  -7  893.51   27.40
  -1   0  -7  916.61   28.80
  -1   0  -7  937.41   28.70
   1   0   7  952.40   28.10
   1   0   7  940.61   27.30
  -2   0  -7   52.99    3.20
  -2   0  -7   55.79    3.40
  -2   0  -7   46.20    2.70
   2   0   7   58.39    2.60
   2   0   7   62.29    2.90
  -3   0  -7   97.59    5.00
  -3   0  -7   94.79    5.00
   3   0   7  104.69    4.30
   3   0   7  104.59    4.30
  -4   0  -7  699.73   22.80
   4   0   7  701.03   21.50
   4   0   7  679.23   21.90
  -5   0  -7  185.08    8.00
   5   0   7  187.78    7.60
   5   0   7  181.98    6.80
  -6   0  -7   53.79    3.80
   6   0   7   55.99    3.00
   6   0   7   50.99    3.60
  -7   0  -7  223.68    9.40
   7   0   7  227.58    8.20
   7   0   7  232.78    9.60
  -8   0  -7  117.19    6.10
   8   0   7  127.09    6.70
  10  -1  -7   32.10    3.70
  10  -1  -7   38.50    3.40
   9  -1  -7   45.60    4.20
   9  -1  -7   47.20    3.70
   8  -1  -7  111.79    6.20
   8  -1  -7  105.49    5.50
   7  -1  -7  199.28    8.00
   7  -1  -7  193.48    8.60
   6  -1  -7   40.60    3.10
   6  -1  -7   38.10    2.60
  -6   1   7   42.80    2.00
   5  -1  -7  312.67   11.30
   5  -1  -7  299.27   10.10
  -5   1   7  276.57    9.70
   4  -1  -7  648.74   20.10
   4  -1  -7  649.54   21.40
   4  -1  -7  676.93   20.20
   3  -1  -7  614.24   19.30
   3  -1  -7  623.44   18.50
   3  -1  -7  614.14   20.00
   2  -1  -7  501.05   16.50
   2  -1  -7  494.75   16.10
   1  -1  -7  305.57   10.70
   1  -1  -7  298.87   10.70
   0  -1  -7  864.51   25.90
   0  -1  -7  895.21   27.70
   0  -1  -7  891.31   27.60
  -1  -1  -7  521.85   17.10
  -1  -1  -7  469.65   15.40
  -1  -1  -7  496.15   16.70
   1   1   7  532.75   16.00
   1   1   7  503.25   15.30
  -2  -1  -7  981.10   30.30
  -2  -1  -7  942.21   29.90
   2   1   7  948.01   28.70
   2   1   7  945.51   28.50
  -3  -1  -7  549.74   18.80
  -3  -1  -7  555.94   18.70
   3   1   7  554.44   17.50
   3   1   7  545.15   17.20
  -4  -1  -7  314.27   12.10
  -4  -1  -7  309.57   12.00
   4   1   7  318.27   11.10
   4   1   7  320.07   10.40
  -5  -1  -7  227.98    9.50
   5   1   7  222.88    8.80
   5   1   7  227.08    7.80
  -6  -1  -7  174.98    8.10
   6   1   7  172.88    7.70
   6   1   7  179.28    6.30
  -7  -1  -7  199.18    8.90
   7   1   7  194.48    8.70
  10  -2  -7    5.60    1.60
  10  -2  -7    5.80    1.90
   9  -2  -7  107.89    5.90
   9  -2  -7  108.59    6.40
   8  -2  -7  172.38    7.50
   8  -2  -7  164.58    8.00
   7  -2  -7   23.00    2.50
   7  -2  -7   22.90    2.30
   6  -2  -7  268.87    9.60
   6  -2  -7  249.18   10.20
  -6   2   7  257.27    8.40
   5  -2  -7  260.47    8.80
   5  -2  -7  238.28    9.60
  -5   2   7  232.88    8.50
   4  -2  -7  264.37   10.10
   4  -2  -7  278.47    9.10
   4  -2  -7  258.77    9.10
   3  -2  -7  223.18    8.20
   3  -2  -7  226.08    8.80
   3  -2  -7  230.78    7.50
   2  -2  -7  332.57   11.60
   2  -2  -7  306.07   11.20
   2  -2  -7  314.97    9.70
   2  -2  -7  322.17    9.90
   1  -2  -7  439.56   15.00
   1  -2  -7  435.96   15.00
   1  -2  -7  445.86   13.30
   0  -2  -7   48.00    3.10
   0  -2  -7   45.30    3.20
  -1  -2  -7  228.98    8.10
  -1  -2  -7  262.67    9.50
  -1  -2  -7  241.68    9.60
  -2  -2  -7  388.26   13.60
  -2  -2  -7  365.16   13.80
   2   2   7  382.06   12.20
   2   2   7  379.96   12.20
  -3  -2  -7  263.17   13.50
  -3  -2  -7  236.38   10.00
   3   2   7  242.28    8.70
  -4  -2  -7   33.70    3.10
  -4  -2  -7   33.00    3.20
   4   2   7   39.50    2.60
  -5  -2  -7  306.67   12.40
  -5  -2  -7  320.67   12.30
   5   2   7  299.17   11.20
   5   2   7  292.87    9.60
  -6  -2  -7  158.18    7.80
   6   2   7  162.48    7.30
  -7  -2  -7   42.50    3.80
   7   2   7   47.50    3.60
  10  -3  -7   31.80    3.30
  10  -3  -7   24.60    4.30
   9  -3  -7   57.69    4.10
   9  -3  -7   53.89    4.40
   8  -3  -7   38.90    3.50
   8  -3  -7   38.90    3.20
   7  -3  -7   57.19    3.60
   7  -3  -7   50.79    3.90
   6  -3  -7   56.59    2.40
   6  -3  -7   59.79    3.40
  -6   3   7   45.20    2.50
   5  -3  -7  133.39    5.30
   5  -3  -7  146.69    5.80
   5  -3  -7  144.79    6.60
   4  -3  -7   41.20    2.50
   4  -3  -7   39.90    2.40
   4  -3  -7   41.70    3.10
   3  -3  -7  183.08    7.70
   3  -3  -7  183.18    7.30
   3  -3  -7  187.18    6.50
   2  -3  -7  292.67   10.80
   2  -3  -7  313.27   11.10
   2  -3  -7  284.77    9.30
   1  -3  -7  105.39    5.20
   1  -3  -7  104.39    3.90
   1  -3  -7  110.49    5.40
   0  -3  -7    3.30    0.90
   0  -3  -7    5.00    0.80
   0  -3  -7    3.60    1.20
  -1  -3  -7  147.99    6.90
  -1  -3  -7  133.89    6.40
  -2  -3  -7   45.20    4.90
  -2  -3  -7   40.30    3.60
   2   3   7   53.39    2.40
   2   3   7   51.79    2.70
   2   3   7   55.89    3.40
  -3  -3  -7   32.60    3.20
  -3  -3  -7   45.80    3.50
   3   3   7   41.30    2.50
   3   3   7   40.00    2.00
  -4  -3  -7  116.39    6.50
  -4  -3  -7  122.39    6.50
   4   3   7  116.39    5.30
  -5  -3  -7  127.19    6.90
  -5  -3  -7  130.89    7.00
   5   3   7  120.09    5.80
  -6  -3  -7    7.90    2.10
  -6  -3  -7   14.40    2.90
   6   3   7   12.50    2.00
  10  -4  -7   11.60    2.50
   9  -4  -7    6.50    1.80
   9  -4  -7    7.10    1.90
   8  -4  -7   59.69    4.10
   8  -4  -7   56.99    4.40
   7  -4  -7    1.30    0.90
   7  -4  -7    4.30    1.50
   6  -4  -7   40.90    2.20
   6  -4  -7   41.20    3.40
   6  -4  -7   38.80    2.90
   5  -4  -7   64.39    3.40
   5  -4  -7   74.19    3.80
   5  -4  -7   72.09    4.40
   4  -4  -7  236.88    9.50
   4  -4  -7  235.58    8.40
   4  -4  -7  229.78    8.70
   3  -4  -7  154.18    5.90
   3  -4  -7  163.58    6.90
   3  -4  -7  154.58    7.00
   2  -4  -7  125.49    6.00
   2  -4  -7  132.49    6.20
   1  -4  -7  212.18    8.90
   1  -4  -7  217.68    8.70
   0  -4  -7   32.70    3.00
   0  -4  -7   30.80    2.70
  -1  -4  -7   81.69    5.00
  -2  -4  -7   47.00    3.90
  -2  -4  -7   50.99    3.60
   2   4   7   37.90    2.00
   2   4   7   41.10    2.00
  -3  -4  -7   19.40    3.20
  -3  -4  -7   21.30    2.60
   3   4   7   17.50    1.80
  -4  -4  -7   62.99    4.60
  -4  -4  -7   59.09    4.60
   4   4   7   61.79    3.70
  -5  -4  -7   10.80    2.30
  -5  -4  -7    9.50    2.50
   5   4   7   11.70    2.00
  -6  -4  -7   36.10    3.90
  -6  -4  -7   33.40    3.80
   6   4   7   39.60    3.20
   9  -5  -7  101.19    6.10
   9  -5  -7   95.69    5.80
   8  -5  -7   83.49    5.30
   8  -5  -7   80.39    5.00
   7  -5  -7   16.50    1.30
   7  -5  -7   19.70    2.60
   6  -5  -7  173.68    7.30
   6  -5  -7  170.38    7.90
   6  -5  -7  165.48    6.30
   5  -5  -7  210.28    9.20
   5  -5  -7  222.68    8.30
   5  -5  -7  224.58    8.50
   4  -5  -7    4.30    1.40
   4  -5  -7    6.30    1.30
   4  -5  -7    5.30    1.20
   3  -5  -7   78.39    4.60
   3  -5  -7   80.49    3.80
   3  -5  -7   80.69    4.70
   2  -5  -7  570.54   19.40
   2  -5  -7  570.74   19.50
   1  -5  -7  126.49    6.20
   0  -5  -7    5.40    1.70
   0  -5  -7    7.40    1.70
  -1  -5  -7  140.39    6.70
  -1  -5  -7  130.79    7.10
  -2  -5  -7  224.28   10.20
  -2  -5  -7  227.28    9.70
  -3  -5  -7    1.70    1.30
  -3  -5  -7    1.20    1.00
  -4  -5  -7  122.49    7.00
  -4  -5  -7  124.09    7.20
  -5  -5  -7  115.39    7.10
   5   5   7  117.39    5.80
   9  -6  -7   72.19    4.90
   9  -6  -7   69.59    5.20
   8  -6  -7   29.50    3.30
   8  -6  -7   32.90    3.40
   7  -6  -7  153.08    7.00
   7  -6  -7  131.69    5.30
   7  -6  -7  150.98    7.40
   6  -6  -7  199.28    8.40
   6  -6  -7  198.78    7.60
   6  -6  -7  211.48    9.10
   5  -6  -7   34.70    3.10
   5  -6  -7   32.30    2.70
   5  -6  -7   35.90    2.80
   4  -6  -7  163.68    7.50
   4  -6  -7  149.69    7.00
   4  -6  -7  164.88    6.60
   3  -6  -7  449.16   14.90
   3  -6  -7  455.65   16.30
   3  -6  -7  461.05   16.30
   2  -6  -7  274.87   11.20
   2  -6  -7  273.77   11.00
   1  -6  -7    1.80    1.10
   1  -6  -7    1.70    1.20
   0  -6  -7  409.46   15.00
   0  -6  -7  396.96   15.50
  -1  -6  -7  299.87   12.10
  -1  -6  -7  307.87   12.80
  -2  -6  -7  117.99    6.50
  -2  -6  -7  120.49    7.00
  -3  -6  -7  101.99    6.10
  -3  -6  -7  107.79    6.70
  -4  -6  -7  249.48   12.40
  -4  -6  -7  271.47   11.70
   8  -7  -7  107.19    6.20
   8  -7  -7  106.99    6.40
   7  -7  -7  127.19    5.30
   7  -7  -7  138.69    6.90
   7  -7  -7  136.89    7.10
   6  -7  -7   43.70    3.10
   6  -7  -7   46.20    3.60
   6  -7  -7   39.10    3.60
   5  -7  -7   32.70    3.20
   5  -7  -7   33.60    3.00
   5  -7  -7   32.00    3.00
   4  -7  -7  373.66   13.10
   4  -7  -7  354.36   13.70
   4  -7  -7  393.56   14.30
   3  -7  -7  253.57   10.50
   3  -7  -7  243.78   10.30
   2  -7  -7    5.50    1.70
   2  -7  -7    5.10    1.80
   1  -7  -7  212.68    9.80
   1  -7  -7  202.48    9.10
   0  -7  -7  217.78    9.80
   0  -7  -7  239.28   10.70
  -1  -7  -7  190.88    9.00
  -1  -7  -7  199.68    9.80
  -2  -7  -7   46.60    4.40
  -2  -7  -7   40.10    3.70
  -3  -7  -7  268.27   11.80
  -4  -7  -7   85.39    6.50
  -4  -7  -7   91.59    6.20
   8  -8  -7   68.99    5.00
   8  -8  -7   60.79    4.60
   7  -8  -7    6.20    1.90
   7  -8  -7   10.90    1.90
   7  -8  -7    9.30    2.20
   6  -8  -7   16.80    2.50
   6  -8  -7   10.70    2.20
   6  -8  -7   11.40    2.20
   5  -8  -7  157.48    7.40
   5  -8  -7  150.88    7.70
   5  -8  -7  162.58    7.20
   4  -8  -7  142.29    7.10
   4  -8  -7  130.09    7.00
   3  -8  -7   22.90    3.20
   3  -8  -7   20.20    3.20
   2  -8  -7   94.89    5.70
   2  -8  -7   96.29    6.10
   1  -8  -7  134.39    7.50
   1  -8  -7  122.19    6.60
   0  -8  -7  135.89    7.10
   0  -8  -7  139.09    7.90
  -1  -8  -7    1.30    1.60
  -1  -8  -7    3.10    1.30
  -2  -8  -7  143.29    8.40
  -2  -8  -7  152.58    8.00
   6  -9  -7   25.80    3.00
   6  -9  -7   25.70    3.20
   6  -9  -7   31.90    3.30
   5  -9  -7   25.40    3.00
   5  -9  -7   33.60    3.50
   5  -9  -7   28.10    3.20
   4  -9  -7    4.60    2.00
   4  -9  -7    4.20    1.70
   4  -9  -7    4.30    1.70
   3  -9  -7   21.80    3.20
   3  -9  -7   20.60    3.40
   2  -9  -7   11.20    2.70
   2  -9  -7   18.30    3.00
   1  -9  -7   69.49    5.60
   1  -9  -7   70.19    5.00
   0  -9  -7    7.80    2.20
  -1  -9  -7   22.40    3.90
  -1  -9  -7   23.30    3.90
   5 -10  -7   32.60    3.40
   5 -10  -7   32.40    3.50
   5 -10  -7   31.60    3.50
   4 -10  -7   46.60    3.80
   4 -10  -7   43.50    4.00
   4 -10  -7   51.39    4.50
   3 -10  -7   13.80    3.00
   3 -10  -7   19.00    2.90
   2 -10  -7   29.60    3.40
   1 -10  -7   56.49    5.10
   1 -10  -7   58.29    4.70
  -1 -15   8  118.39    7.50
  -1 -15   8  119.49    5.90
   0 -15   8  105.99    5.70
   0 -15   8  100.99    6.90
   1 -15   8   18.00    2.60
   1 -15   8   16.20    3.00
   2 -15   8  120.79    6.50
   2 -15   8  118.79    7.30
   3 -15   8  126.59    7.30
   3 -15   8  130.99    7.30
  -3 -14   8   36.30    4.10
  -3 -14   8   37.60    2.70
  -2 -14   8  204.48   11.10
  -2 -14   8  206.68    8.40
  -1 -14   8  126.29    6.10
  -1 -14   8  125.69    7.70
   0 -14   8    3.80    1.60
   0 -14   8    0.00    1.10
   1 -14   8   64.69    4.30
   1 -14   8   59.69    4.90
   2 -14   8  197.88    8.70
   2 -14   8  184.28    9.30
   3 -14   8   12.40    2.60
   3 -14   8   15.90    2.90
   3 -14   8   20.70    3.10
   4 -14   8   50.19    4.20
   4 -14   8   47.50    7.10
   4 -14   8   52.79    5.20
  -4 -13   8   19.30    2.20
  -3 -13   8   69.59    3.90
  -3 -13   8   63.59    5.40
  -2 -13   8   87.09    6.00
  -2 -13   8   81.99    4.50
  -1 -13   8    6.50    2.20
  -1 -13   8    4.60    1.30
   0 -13   8   38.80    3.60
   0 -13   8   40.60    3.10
   1 -13   8  105.79    5.70
   1 -13   8  110.79    6.50
   2 -13   8   26.00    3.00
   2 -13   8   21.50    2.50
   3 -13   8    8.90    2.10
   3 -13   8    8.40    2.10
   3 -13   8   10.60    2.40
   4 -13   8  165.78    8.20
   4 -13   8  164.48    8.40
   4 -13   8  167.58    8.10
   5 -13   8   54.49    4.20
   5 -13   8   56.89    4.90
   5 -13   8   52.59    4.20
  -6 -12   8   29.40    7.00
  -5 -12   8   70.49    5.50
  -5 -12   8   71.29    3.70
  -4 -12   8    5.10    1.90
  -4 -12   8    4.90    1.20
  -3 -12   8   12.70    2.60
  -3 -12   8   14.10    2.00
  -2 -12   8   39.40    3.70
  -2 -12   8   37.00    2.80
  -1 -12   8   39.40    3.70
  -1 -12   8   39.70    3.00
   0 -12   8   25.30    2.50
   0 -12   8   28.20    3.10
   1 -12   8   61.59    4.10
   2 -12   8   67.89    4.40
   3 -12   8   31.80    3.40
   3 -12   8   32.70    3.10
   4 -12   8   27.20    3.60
   4 -12   8   27.20    2.90
   5 -12   8   56.69    4.90
   5 -12   8   71.09    4.80
   6 -12   8   24.30    3.60
   6 -12   8   27.00    3.00
  -6 -11   8  128.59    7.70
  -6 -11   8  134.99    5.60
  -5 -11   8   34.20    2.60
  -5 -11   8   37.10    3.80
  -4 -11   8    4.30    1.70
  -4 -11   8    4.00    1.10
  -3 -11   8  350.86   12.30
  -3 -11   8  342.97   13.90
  -2 -11   8  337.77   13.50
  -2 -11   8  332.17   12.00
  -1 -11   8   18.50    2.10
  -1 -11   8   21.60    3.10
   0 -11   8   37.20    3.10
   1 -11   8  392.96   14.20
   2 -11   8   76.69    4.60
   3 -11   8   26.40    2.90
   3 -11   8   32.70    3.00
   4 -11   8  142.29    7.20
   4 -11   8  143.69    7.10
   5 -11   8  103.09    6.00
   5 -11   8  110.49    6.50
   6 -11   8   19.20    2.90
   6 -11   8   21.10    3.20
   7 -11   8   39.30    3.70
   7 -11   8   35.80    5.00
  -7 -10   8  151.68    8.20
  -7 -10   8  135.99    5.80
  -6 -10   8  183.08    7.10
  -6 -10   8  181.68    9.10
  -5 -10   8   33.70    3.50
  -5 -10   8   35.40    2.50
  -4 -10   8  274.87   10.00
  -4 -10   8  268.47   11.50
  -3 -10   8  411.36   14.30
  -3 -10   8  431.66   15.90
  -2 -10   8   83.79    4.30
  -1 -10   8   64.79    3.80
   0 -10   8  913.21   28.90
   1 -10   8  474.95   18.30
   2 -10   8  203.08    8.50
   3 -10   8  221.88    9.20
   3 -10   8  212.38    9.00
   4 -10   8  115.09    6.20
   4 -10   8  117.39    6.10
   5 -10   8   17.00    2.60
   5 -10   8   18.30    2.90
   6 -10   8   49.00    4.30
   6 -10   8   50.39    4.00
   7 -10   8  132.39    7.70
   7 -10   8  145.49    7.90
   8   9  -8  140.49    9.00
  -8  -9   8  149.49    7.80
  -8  -9   8  139.19    6.10
   7   9  -8   94.69    5.40
  -7  -9   8  103.79    6.30
  -7  -9   8  108.69    4.90
  -6  -9   8    9.50    2.10
  -6  -9   8   10.00    1.60
  -5  -9   8  317.47   12.40
  -5  -9   8  288.57   10.70
  -4  -9   8  614.94   21.10
  -4  -9   8  595.64   19.50
  -3  -9   8  147.09    6.20
  -2  -9   8   30.50    2.30
  -1  -9   8  373.26   13.10
   0  -9   8  207.88    8.30
   1  -9   8   75.39    4.20
   2  -9   8  457.15   16.80
   3  -9   8  625.74   21.10
   3  -9   8  628.94   20.80
   4  -9   8  165.88    7.50
   4  -9   8  153.58    7.30
   5  -9   8   44.60    3.80
   5  -9   8   40.70    3.40
  -6   9  -8  231.28    7.90
   6  -9   8  226.48    9.80
   6  -9   8  207.48    9.80
  -7   9  -8  156.68    6.20
   7  -9   8  145.09    7.80
   7  -9   8  154.88    7.60
   8   8  -8  125.19    6.50
  -8  -8   8  128.09    6.80
  -8  -8   8  121.49    5.60
   7   8  -8   16.30    2.30
  -7  -8   8   14.70    2.60
  -7  -8   8   17.80    2.20
   6   8  -8   45.00    3.20
  -6  -8   8   35.50    3.50
  -6  -8   8   43.20    2.90
   5   8  -8  294.57   10.90
  -5  -8   8  297.07   10.60
  -4  -8   8  253.17    9.30
  -4  -8   8  248.88   10.10
  -3  -8   8  187.58    7.40
  -2  -8   8  136.49    5.80
  -1  -8   8  306.57    9.80
  -1  -8   8  318.47   11.20
   0  -8   8   32.60    2.40
   1  -8   8  237.38    9.20
   2  -8   8  279.97   10.40
   2  -8   8  305.17   11.10
   3  -8   8  383.96   13.40
   3  -8   8  368.36   13.50
  -4   8  -8  171.48    5.70
   4  -8   8  164.28    7.40
   4  -8   8  154.98    7.30
  -5   8  -8  139.99    5.30
   5  -8   8  140.39    6.80
   5  -8   8  128.19    6.60
  -6   8  -8  245.08    9.00
   6  -8   8  252.37   10.40
   6  -8   8  256.77   10.70
   7  -8   8   24.50    3.40
   7  -8   8   28.50    3.00
   8  -8   8   35.70    3.50
   8  -8   8   28.60    4.80
  -9  -7   8   11.10    2.30
   8   7  -8   26.60    2.70
   7   7  -8   12.70    2.00
  -7  -7   8    8.00    1.90
   6   7  -8   28.50    2.40
  -6  -7   8   27.00    2.70
   5   7  -8   39.80    2.60
  -5  -7   8   30.60    2.80
  -4  -7   8   16.20    1.70
   3   7  -8   98.19    4.30
  -3  -7   8   94.09    4.50
   2   7  -8  151.08    5.60
  -2  -7   8  140.19    6.10
   1   7  -8  110.79    4.10
  -1  -7   8  102.29    4.20
  -1  -7   8  113.49    5.00
   0   7  -8   35.60    1.60
   0  -7   8   28.40    2.20
   1  -7   8  368.96   12.90
   2  -7   8   71.89    4.00
   2  -7   8   77.29    3.90
  -3   7  -8   23.60    1.50
   3  -7   8   24.10    2.30
   3  -7   8   24.80    2.30
  -4   7  -8  176.18    6.60
   4  -7   8  173.98    7.60
   4  -7   8  160.18    7.30
  -5   7  -8   94.79    4.40
   5  -7   8   98.59    7.60
   5  -7   8  110.09    5.60
   6  -7   8   15.50    2.50
   6  -7   8   14.10    2.30
   7  -7   8   22.00    3.20
   7  -7   8   19.20    2.70
   8  -7   8   29.60    3.30
   8  -7   8   21.60    3.00
   9   6  -8   19.20    2.70
  -9  -6   8   17.70    2.40
   8   6  -8   44.70    3.30
  -8  -6   8   49.80    3.60
   7   6  -8    4.30    1.10
  -7  -6   8    3.90    1.40
   6   6  -8   69.89    3.80
  -6  -6   8   63.19    3.80
   5   6  -8  211.88    8.00
   5   6  -8  217.28    8.60
   4   6  -8  126.19    5.50
   4   6  -8  122.39    5.10
   3   6  -8   65.29    3.40
  -2  -6   8  232.08    8.60
   1   6  -8  310.17   10.00
  -1  -6   8  303.27    9.90
  -1  -6   8  307.87   10.90
   0   6  -8  120.79    4.30
   0  -6   8  100.49    4.90
  -1   6  -8   69.09    2.90
   1  -6   8   78.09    3.50
   1  -6   8   70.69    3.80
  -2   6  -8  448.46   14.20
   2  -6   8  461.35   14.90
   2  -6   8  456.45   15.50
   3  -6   8  193.08    7.70
   3  -6   8  195.48    8.00
  -4   6  -8   14.40    1.50
   4  -6   8   10.90    1.90
   4  -6   8   10.10    2.40
   5  -6   8   20.90    2.40
   5  -6   8   19.50    2.60
   6  -6   8   23.30    2.60
   6  -6   8   26.40    2.70
   7  -6   8   22.10    3.20
   7  -6   8   20.30    2.70
   8  -6   8   12.40    2.20
   8  -6   8   12.80    2.50
   9   5  -8  146.19    7.20
  -9  -5   8  152.98    6.30
   8   5  -8   69.99    4.40
  -8  -5   8   82.99    4.30
   7   5  -8   73.49    4.00
  -7  -5   8   59.89    3.70
   6   5  -8  223.18    8.30
   6   5  -8  217.78    9.10
  -6  -5   8  211.68    8.30
   5   5  -8  403.96   13.30
   5   5  -8  399.46   14.10
   4   5  -8   93.59    4.00
   4   5  -8   99.49    4.70
   3   5  -8  465.85   15.30
   2   5  -8  813.32   25.40
  -2  -5   8  845.32   24.90
   1   5  -8  375.86   11.70
  -1  -5   8  357.36   11.50
  -1  -5   8  351.96   12.20
  -1  -5   8  348.27   11.10
   0   5  -8  122.79    4.60
   0  -5   8  113.99    4.40
   0  -5   8  115.19    5.10
  -1   5  -8  652.63   19.50
   1  -5   8  628.74   19.50
   1  -5   8  622.44   20.30
  -2   5  -8  309.07   10.70
   2  -5   8  306.87   11.10
   2  -5   8  310.57   10.60
  -3   5  -8   48.80    2.80
   3  -5   8   61.39    3.50
   3  -5   8   57.89    3.30
  -4   5  -8  133.39    5.60
   4  -5   8  129.29    5.90
   4  -5   8  136.19    6.10
   5  -5   8  528.45   18.10
   5  -5   8  527.75   17.90
   6  -5   8  169.08    7.40
   6  -5   8  166.98    7.70
   7  -5   8    4.30    1.50
   7  -5   8    2.20    1.30
   8  -5   8   71.39    5.00
   8  -5   8   74.89    4.60
  10   4  -8  139.19    7.60
   9   4  -8   80.89    4.90
   8   4  -8   42.30    3.10
  -8  -4   8   35.00    2.50
   7   4  -8  136.39    6.20
   7   4  -8  142.09    7.00
  -7  -4   8  142.59    5.90
   6   4  -8  398.26   14.50
   6   4  -8  404.36   13.60
   5   4  -8  196.18    8.10
   5   4  -8  195.58    7.20
   4   4  -8  136.89    5.20
   4   4  -8  139.79    6.00
   3   4  -8  603.14   18.00
   3   4  -8  605.24   19.00
  -3  -4   8  575.74   18.20
   2   4  -8  615.04   19.40
  -1  -4   8  381.86   11.40
  -1  -4   8  365.26   12.60
   0   4  -8  773.72   23.60
   0  -4   8  762.92   24.00
   0  -4   8  765.62   22.80
  -1   4  -8 1848.62   54.39
   1  -4   8 1826.62   54.49
   1  -4   8 1816.32   53.59
  -2   4  -8  141.39    5.60
   2  -4   8  142.19    7.00
   2  -4   8  152.48    6.20
  -3   4  -8   99.79    4.50
   3  -4   8   96.49    4.50
   3  -4   8  100.29    4.80
  -4   4  -8  571.44   18.80
   4  -4   8  584.04   19.10
   4  -4   8  581.44   19.00
   5  -4   8  609.24   20.40
   5  -4   8  628.04   20.40
   6  -4   8   74.39    4.50
   6  -4   8   78.39    4.40
   7  -4   8  157.08    7.50
   7  -4   8  147.29    6.80
   8  -4   8  128.99    7.10
   8  -4   8  130.39    6.30
  10   3  -8   86.39    5.30
   9   3  -8    7.60    1.80
   8   3  -8   81.69    5.30
   8   3  -8   93.39    4.90
  -8  -3   8   86.89    3.70
   7   3  -8  215.58    9.50
   7   3  -8  227.88    8.70
  -7  -3   8  228.38    8.00
   6   3  -8  112.19    4.90
   6   3  -8  108.69    5.70
   5   3  -8  105.09    4.50
   5   3  -8  112.29    5.40
   4   3  -8  296.27   10.70
   3   3  -8  667.13   19.50
   3   3  -8  643.24   20.80
  -3  -3   8  652.03   20.00
   2   3  -8   70.89    3.60
  -2  -3   8   75.09    2.70
   1   3  -8  298.87   10.20
   0   3  -8 1429.36   42.40
   0   3  -8 1422.76   42.20
   0  -3   8 1390.86   42.40
  -1   3  -8  353.86   12.10
  -1   3  -8  367.26   11.90
   1  -3   8  353.66   12.10
   1  -3   8  345.47   11.10
  -2   3  -8  136.39    5.80
  -2   3  -8  132.99    5.50
   2  -3   8  136.89    5.70
   2  -3   8  134.49    5.10
  -3   3  -8  519.45   17.70
  -3   3  -8  526.95   17.50
   3  -3   8  549.25   17.20
   3  -3   8  558.94   17.70
  -4   3  -8  587.54   19.10
  -4   3  -8  586.54   19.10
   4  -3   8  574.14   18.90
   4  -3   8  561.44   18.70
  -5   3  -8   66.89    4.50
   5  -3   8   86.99    4.40
   5  -3   8   80.59    4.30
  -6   3  -8   89.49    4.90
   6  -3   8  103.59    5.10
   6  -3   8   93.59    5.10
   7  -3   8  278.77   11.50
   7  -3   8  294.97   10.80
   8  -3   8   49.30    3.40
   8  -3   8   45.10    3.90
  10   2  -8    8.60    1.90
   9   2  -8   28.00    3.20
   9   2  -8   27.30    2.80
   8   2  -8  115.79    5.70
   8   2  -8  120.29    6.50
   7   2  -8  228.78    9.70
   7   2  -8  234.18    8.70
  -7  -2   8  222.68    7.60
  -7  -2   8  214.18    7.50
   6   2  -8    2.40    1.00
   6   2  -8    3.40    1.00
   5   2  -8  186.48    7.90
   5   2  -8  195.88    6.90
   4   2  -8  356.86   12.70
   4   2  -8  365.86   11.40
  -4  -2   8  355.66   11.50
   3   2  -8  121.69    4.00
   3   2  -8  119.49    5.30
  -3  -2   8  111.29    4.10
   2   2  -8  231.88    8.50
   1   2  -8  778.72   24.60
   1   2  -8  805.72   24.60
   0   2  -8   99.99    4.30
   0   2  -8   94.09    4.40
   0  -2   8   92.19    4.30
  -1   2  -8    3.50    1.00
  -1   2  -8    3.70    0.90
   1  -2   8    3.80    0.60
   1  -2   8    3.10    0.80
  -2   2  -8  403.66   13.60
  -2   2  -8  418.66   13.90
  -2   2  -8  383.46   12.80
   2  -2   8  409.96   12.90
   2  -2   8  415.86   13.60
  -3   2  -8  377.46   12.90
  -3   2  -8  374.06   12.80
   3  -2   8  348.17   12.00
   3  -2   8  356.86   12.40
  -4   2  -8   76.09    4.20
  -4   2  -8   77.79    4.40
   4  -2   8   78.29    4.00
   4  -2   8   75.09    3.90
  -5   2  -8   56.59    3.60
   5  -2   8   55.99    3.30
   5  -2   8   58.09    3.50
  -6   2  -8  182.48    8.10
   6  -2   8  205.58    8.40
   6  -2   8  197.38    7.80
  -7   2  -8   50.39    3.50
   7  -2   8   48.60    3.20
   7  -2   8   49.00    3.70
  -8   2  -8    1.00    1.00
   8  -2   8   -0.10    1.10
   8  -2   8    1.20    1.10
  10   1  -8   53.59    3.90
   9   1  -8   26.20    3.10
   9   1  -8   31.60    2.90
   8   1  -8   18.30    2.40
   8   1  -8    9.70    2.10
   7   1  -8  152.98    7.40
   7   1  -8  158.18    6.50
  -7  -1   8  149.19    5.20
   6   1  -8  106.99    4.60
   6   1  -8  107.09    5.50
  -6  -1   8   93.29    4.00
   5   1  -8   93.69    3.90
   5   1  -8   93.29    4.90
   4   1  -8  229.08    9.00
   4   1  -8  234.38    7.60
  -4  -1   8  235.68    7.80
   3   1  -8   95.59    4.10
   3   1  -8   92.89    4.60
   2   1  -8  178.68    7.00
   2   1  -8  169.58    6.60
   1   1  -8   98.79    4.50
   1   1  -8  102.39    4.60
   0   1  -8  246.48    9.00
   0   1  -8  249.68    9.20
  -1   1  -8  170.38    6.60
  -1   1  -8  160.18    5.30
  -1   1  -8  168.88    6.80
   1  -1   8  149.99    5.20
   1  -1   8  150.18    6.10
  -2   1  -8  125.99    5.60
  -2   1  -8  124.59    5.70
  -2   1  -8  116.59    4.70
   2  -1   8  126.49    4.70
   2  -1   8  130.79    5.30
  -3   1  -8  186.78    7.90
  -3   1  -8  185.28    7.80
   3  -1   8  200.08    7.30
   3  -1   8  189.28    7.00
  -4   1  -8  173.48    7.70
   4  -1   8  174.78    6.90
   4  -1   8  178.78    6.90
  -5   1  -8  160.68    7.50
  -5   1  -8  160.58    7.20
   5  -1   8  155.28    6.40
   5  -1   8  161.48    6.80
  -6   1  -8   49.80    3.60
   6  -1   8   50.99    3.60
   6  -1   8   56.79    3.20
  -7   1  -8   24.30    2.60
   7  -1   8   25.30    2.70
   7  -1   8   25.20    2.30
  10   0  -8   10.60    2.20
   9   0  -8   13.10    2.60
   9   0  -8   14.60    2.20
   8   0  -8  245.68   10.60
   8   0  -8  236.48   12.40
   7   0  -8  146.19    6.10
   7   0  -8  130.39    6.80
   6   0  -8   26.30    2.60
   6   0  -8   32.20    2.20
  -6   0   8   28.30    2.00
   5   0  -8   96.69    4.00
   5   0  -8   93.19    5.00
   4   0  -8  443.26   15.40
   4   0  -8  454.75   13.80
   4   0  -8  441.86   14.20
   3   0  -8   75.09    3.50
   3   0  -8   75.19    4.10
   2   0  -8   92.09    4.60
   2   0  -8   94.99    4.30
   1   0  -8  587.64   19.20
   1   0  -8  595.84   19.10
   0   0  -8  314.07   11.30
   0   0  -8  317.97   11.30
  -1   0  -8   28.30    2.30
  -1   0  -8   33.10    2.50
  -1   0  -8   28.00    1.60
   1   0   8   27.40    1.40
   1   0   8   29.80    2.00
  -2   0  -8  497.75   16.90
  -2   0  -8  496.95   16.70
   2   0   8  499.15   15.90
   2   0   8  483.05   15.40
  -3   0  -8  256.17   10.20
  -3   0  -8  247.38   10.20
   3   0   8  265.97    9.10
   3   0   8  274.87    9.30
  -4   0  -8  111.69    5.80
  -4   0  -8  115.89    6.00
   4   0   8  108.39    5.00
   4   0   8  116.59    4.90
  -5   0  -8   36.30    3.20
  -5   0  -8   34.00    3.20
   5   0   8   34.80    2.30
   5   0   8   34.10    2.60
  -6   0  -8   32.20    3.40
  -6   0  -8   32.10    3.10
   6   0   8   38.00    2.50
   6   0   8   35.70    2.90
  -7   0  -8   58.89    4.10
   7   0   8   50.99    2.90
   7   0   8   48.70    3.90
  10  -1  -8   13.80    2.20
   9  -1  -8  218.88   10.30
   9  -1  -8  238.48    9.70
   8  -1  -8  178.68    8.50
   7  -1  -8   14.60    2.00
   7  -1  -8   15.20    2.40
   6  -1  -8  165.18    6.20
  -6   1   8  138.19    5.50
   5  -1  -8  459.75   14.50
   5  -1  -8  437.36   15.80
   4  -1  -8  311.27   10.00
   4  -1  -8  309.87   10.40
   4  -1  -8  305.67   11.50
   3  -1  -8  179.98    7.00
   3  -1  -8  185.48    7.60
   2  -1  -8  525.45   17.20
   2  -1  -8  524.45   17.60
   1  -1  -8  530.25   17.80
   1  -1  -8  547.85   17.90
   0  -1  -8   59.69    3.60
   0  -1  -8   61.09    3.70
  -1  -1  -8   78.19    4.30
  -1  -1  -8   76.59    4.20
  -1  -1  -8   71.89    3.00
   1   1   8   68.99    3.40
  -2  -1  -8  883.41   28.30
  -2  -1  -8  872.61   28.10
   2   1   8  877.51   26.50
   2   1   8  891.81   26.90
  -3  -1  -8  444.36   15.70
  -3  -1  -8  427.76   15.60
   3   1   8  437.56   14.20
   3   1   8  438.46   14.20
  -4  -1  -8  103.89    5.70
  -4  -1  -8   98.29    5.60
   4   1   8  101.09    4.30
   4   1   8  105.19    4.80
  -5  -1  -8  250.57   10.60
  -5  -1  -8  260.67   10.90
   5   1   8  253.77    8.70
  -6  -1  -8  272.87   11.80
  -6  -1  -8  265.37   11.30
   6   1   8  277.17   10.70
   6   1   8  272.37    9.10
  -7  -1  -8   15.70    3.00
  -7  -1  -8   17.70    2.80
   7   1   8   11.40    2.00
  10  -2  -8   63.09    4.60
  10  -2  -8   54.39    5.50
   9  -2  -8  228.68    9.70
   9  -2  -8  234.98   10.60
   8  -2  -8   93.19    5.70
   8  -2  -8   94.59    5.10
   7  -2  -8   86.39    4.40
   7  -2  -8   79.29    5.00
   6  -2  -8  210.18    8.00
   6  -2  -8  199.78    8.90
  -6   2   8  217.38    7.80
   5  -2  -8  266.27   10.60
   5  -2  -8  269.77    9.40
   5  -2  -8  267.17    9.10
   4  -2  -8  199.18    6.90
   4  -2  -8  194.38    7.40
   4  -2  -8  199.38    8.40
   3  -2  -8  485.35   14.90
   3  -2  -8  489.55   16.70
   3  -2  -8  485.35   16.00
   2  -2  -8  351.36   12.60
   2  -2  -8  334.77   12.10
   1  -2  -8  379.76   13.70
   1  -2  -8  395.36   13.70
   0  -2  -8  351.46   12.90
  -1  -2  -8   99.09    5.30
  -1  -2  -8   89.89    4.80
   1   2   8   86.19    4.00
  -2  -2  -8  857.41   27.30
  -2  -2  -8  771.72   27.60
   2   2   8  820.32   25.00
   2   2   8  849.61   25.20
  -3  -2  -8   62.19    4.30
  -3  -2  -8   64.59    4.40
   3   2   8   66.59    3.00
   3   2   8   61.59    3.20
  -4  -2  -8  230.38   10.00
  -4  -2  -8  249.97   10.30
   4   2   8  223.98    7.80
   4   2   8  225.98    8.60
  -5  -2  -8  345.57   13.70
  -5  -2  -8  346.27   14.00
   5   2   8  362.26   14.40
  -6  -2  -8  134.79    7.20
  -6  -2  -8  132.49    7.50
   6   2   8  135.09    6.40
  10  -3  -8   27.20    3.10
  10  -3  -8   28.50    3.50
   9  -3  -8   30.70    3.40
   9  -3  -8   27.70    3.00
   8  -3  -8   45.60    3.90
   8  -3  -8   49.99    3.60
   7  -3  -8   55.79    4.00
   7  -3  -8   57.89    3.70
   6  -3  -8  126.09    6.50
   6  -3  -8  131.39    4.90
   6  -3  -8  127.99    5.60
   5  -3  -8   75.49    3.70
   5  -3  -8   70.89    3.50
   4  -3  -8  161.48    6.40
   4  -3  -8  147.69    7.10
   4  -3  -8  156.78    5.90
   3  -3  -8  224.08    8.60
   3  -3  -8  222.78    7.50
   3  -3  -8  215.48    9.00
   2  -3  -8  124.09    5.80
   2  -3  -8  111.39    4.10
   2  -3  -8  117.39    5.80
   2  -3  -8  119.09    4.30
   1  -3  -8  355.16   13.10
   1  -3  -8  353.86   11.10
   1  -3  -8  354.26   13.00
   0  -3  -8  705.53   24.00
   0  -3  -8  741.63   23.80
   0  -3  -8  720.33   22.00
  -1  -3  -8  457.55   16.30
  -1  -3  -8  453.25   16.30
   1   3   8  438.26   14.40
  -2  -3  -8   10.50    2.20
  -2  -3  -8   10.00    2.10
   2   3   8   13.50    1.20
  -3  -3  -8  164.88    8.00
  -3  -3  -8  166.18    8.30
   3   3   8  185.38    6.60
   3   3   8  169.28    6.70
  -4  -3  -8  128.89    7.00
  -4  -3  -8  130.09    7.10
   4   3   8  137.99    5.80
  -5  -3  -8   97.59    6.20
  -5  -3  -8   96.99    6.10
   5   3   8   99.39    5.00
  -6  -3  -8   44.60    4.90
  -6  -3  -8   41.70    4.20
   6   3   8   44.00    3.40
   9  -4  -8    3.90    1.80
   9  -4  -8    4.40    1.80
   8  -4  -8   46.30    4.00
   8  -4  -8   46.60    3.70
   7  -4  -8   37.40    2.90
   7  -4  -8   31.80    3.20
   6  -4  -8   66.09    3.20
   6  -4  -8   66.69    4.50
   6  -4  -8   68.79    3.80
   5  -4  -8   82.49    4.10
   5  -4  -8   86.29    4.20
   5  -4  -8   88.19    5.10
   4  -4  -8  126.29    5.20
   4  -4  -8  126.99    5.80
   3  -4  -8   30.30    2.70
   3  -4  -8   27.50    2.00
   3  -4  -8   32.00    2.80
   2  -4  -8   20.30    2.50
   2  -4  -8   23.80    2.40
   1  -4  -8  153.08    9.90
   0  -4  -8   94.29    5.50
   0  -4  -8   89.09    5.10
  -1  -4  -8   12.60    2.30
  -1  -4  -8   18.20    2.30
   1   4   8   22.80    1.70
  -2  -4  -8   28.70    2.90
  -2  -4  -8   24.60    3.10
   2   4   8   27.50    2.10
  -3  -4  -8  111.89    6.50
  -3  -4  -8  111.49    6.30
  -4  -4  -8   27.60    3.40
  -4  -4  -8   28.60    3.30
   4   4   8   26.40    2.40
  -5  -4  -8   14.10    3.00
   5   4   8   12.10    1.90
   9  -5  -8   35.70    3.40
   9  -5  -8   35.90    3.60
   8  -5  -8    3.00    1.60
   8  -5  -8    1.40    1.40
   7  -5  -8   34.20    2.10
   7  -5  -8   41.20    3.60
   6  -5  -8  157.88    7.80
   6  -5  -8  165.38    7.00
   6  -5  -8  155.28    6.30
   5  -5  -8   16.40    1.90
   5  -5  -8   15.50    2.50
   5  -5  -8   17.80    2.00
   3  -5  -8  111.79    6.00
   3  -5  -8  113.09    5.80
   3  -5  -8  111.99    4.80
   2  -5  -8   25.20    2.60
   2  -5  -8   21.20    2.60
   1  -5  -8   57.19    3.90
   1  -5  -8   55.39    4.10
   0  -5  -8    4.60    1.60
   0  -5  -8    6.50    1.60
  -1  -5  -8  122.79    6.80
  -1  -5  -8  128.09    6.60
   1   5   8  117.29    4.80
  -2  -5  -8   63.69    4.50
  -2  -5  -8   62.89    4.80
  -3  -5  -8   56.19    4.40
  -3  -5  -8   50.99    4.40
  -4  -5  -8   44.90    4.50
  -4  -5  -8   46.90    4.30
   8  -6  -8   43.10    3.80
   8  -6  -8   46.30    4.20
   7  -6  -8  126.29    6.40
   7  -6  -8  126.19    5.10
   7  -6  -8  135.69    7.10
   6  -6  -8   67.29    4.10
   6  -6  -8   63.79    3.60
   6  -6  -8   70.69    4.80
   5  -6  -8   16.60    2.40
   5  -6  -8   16.70    2.80
   5  -6  -8   19.70    2.40
   4  -6  -8  158.18    7.90
   4  -6  -8  166.58    6.80
   4  -6  -8  180.08    8.60
   3  -6  -8  224.88    9.50
   3  -6  -8  220.48    8.00
   3  -6  -8  201.48    9.30
   2  -6  -8    5.90    1.60
   1  -6  -8   86.49    5.30
   1  -6  -8   99.89    5.90
   0  -6  -8  263.97   10.80
   0  -6  -8  242.58   11.00
  -1  -6  -8   96.89    5.80
  -1  -6  -8  100.49    6.40
   1   6   8   97.69    4.00
  -2  -6  -8    9.80    2.10
  -2  -6  -8    8.90    2.50
  -3  -6  -8  117.49    7.00
  -3  -6  -8  118.79    9.00
  -4  -6  -8   56.79    4.80
  -4  -6  -8   49.40    4.80
   8  -7  -8   89.19    5.80
   8  -7  -8   92.09    5.60
   7  -7  -8   48.60    3.10
   7  -7  -8   49.40    4.20
   7  -7  -8   47.80    3.70
   6  -7  -8   22.10    2.80
   6  -7  -8   21.40    2.40
   6  -7  -8   20.00    2.70
   5  -7  -8  139.59    7.20
   5  -7  -8  139.79    6.30
   5  -7  -8  136.09    6.70
   4  -7  -8  256.47   10.60
   4  -7  -8  251.07   10.90
   4  -7  -8  258.57    9.60
   3  -7  -8   48.80    3.90
   3  -7  -8   49.80    3.20
   3  -7  -8   48.10    4.00
   2  -7  -8  110.49    6.50
   2  -7  -8  102.09    6.10
   1  -7  -8  237.38   10.60
   1  -7  -8  258.67   11.30
   0  -7  -8  217.38   10.20
   0  -7  -8  194.98    9.30
  -1  -7  -8   34.70    3.90
  -1  -7  -8   30.20    3.30
  -2  -7  -8  288.37   13.70
  -2  -7  -8  309.67   12.90
  -3  -7  -8  141.49    8.40
  -3  -7  -8  132.49    7.70
   7  -8  -8    5.60    1.70
   7  -8  -8    4.60    1.90
   7  -8  -8    5.80    2.00
   6  -8  -8  101.19    5.30
   6  -8  -8   91.09    5.30
   6  -8  -8   94.69    5.90
   5  -8  -8  141.49    6.70
   5  -8  -8  141.09    7.50
   5  -8  -8  143.99    7.10
   4  -8  -8   26.30    3.10
   4  -8  -8   28.70    3.30
   4  -8  -8   28.30    2.80
   3  -8  -8   34.50    3.50
   3  -8  -8   41.40    3.20
   3  -8  -8   49.10    4.00
   2  -8  -8  181.18    9.00
   2  -8  -8  177.68    8.80
   1  -8  -8  206.88    9.90
   1  -8  -8  182.28    9.00
   0  -8  -8   17.50    3.10
   0  -8  -8   15.80    3.00
  -1  -8  -8  156.78    8.80
  -1  -8  -8  138.49    9.50
   5  -9  -8   38.60    3.60
   5  -9  -8   41.20    3.70
   5  -9  -8   39.70    3.90
   4  -9  -8   -1.70    1.40
   4  -9  -8    1.50    1.40
   4  -9  -8    1.90    1.60
   3  -9  -8   58.49    4.00
   3  -9  -8   72.69    5.20
   3  -9  -8   62.79    4.80
   2  -9  -8   83.39    5.90
   2  -9  -8   74.89    5.30
   1  -9  -8   16.40    3.00
   1  -9  -8    9.80    2.40
  -1 -15   9   83.99    6.30
  -1 -15   9   92.69    5.10
   0 -15   9   21.40    3.40
   0 -15   9   24.10    3.10
   1 -15   9  104.09    5.90
   1 -15   9  102.89    6.70
   2 -15   9  125.99    7.30
   2 -15   9  103.79    6.80
  -3 -14   9  125.59    7.90
  -3 -14   9  132.09    6.10
  -2 -14   9  181.48   10.50
  -2 -14   9  208.18    8.50
  -1 -14   9   34.30    3.20
  -1 -14   9   36.10    4.50
   0 -14   9   86.99    6.00
   0 -14   9   92.09    5.30
   1 -14   9  231.08   10.90
   1 -14   9  238.78   10.10
   2 -14   9   71.09    5.20
   2 -14   9   75.99    4.90
   3 -14   9   17.10    2.80
   3 -14   9   17.90    3.10
   3 -14   9   22.00    3.30
   4 -14   9  110.79    7.70
   4 -14   9  108.89    6.50
   4 -14   9  118.19    6.80
  -5 -13   9   12.20    2.90
  -5 -13   9   12.50    2.00
  -4 -13   9  121.79    6.10
  -3 -13   9  198.78    8.20
  -3 -13   9  202.78   10.20
  -2 -13   9   28.10    2.70
  -2 -13   9   26.20    3.90
  -1 -13   9   36.90    3.20
  -1 -13   9   36.30    3.70
   0 -13   9  156.88    7.30
   0 -13   9  150.98    8.10
   1 -13   9  115.99    6.70
   1 -13   9  119.19    6.20
   2 -13   9   17.50    2.70
   3 -13   9  133.79    7.10
   3 -13   9  120.79    6.70
   4 -13   9  200.38    9.40
   4 -13   9  184.08    9.00
   5 -13   9   32.60    3.40
   5 -13   9   28.20    4.80
  -6 -12   9    3.70    1.50
  -5 -12   9    7.10    2.30
  -5 -12   9    4.40    1.50
  -4 -12   9   82.19    5.00
  -4 -12   9   82.19    5.90
  -3 -12   9   10.90    1.90
  -3 -12   9   14.10    2.60
  -2 -12   9   19.10    2.50
  -2 -12   9   14.10    2.70
  -1 -12   9   89.89    5.70
  -1 -12   9   94.39    5.10
   0 -12   9  120.19    6.00
   1 -12   9    7.90    1.80
   2 -12   9   70.39    4.60
   3 -12   9  115.79    6.20
   3 -12   9  107.89    6.10
   4 -12   9   24.30    2.80
   4 -12   9   24.20    3.30
   5 -12   9   13.30    2.70
   5 -12   9   14.30    2.90
   6 -12   9   55.79    4.50
  -6 -11   9   22.00    2.50
  -6 -11   9   18.70    3.30
  -5 -11   9   25.00    2.30
  -5 -11   9   22.60    3.50
  -4 -11   9   64.29    4.80
  -4 -11   9   59.79    3.70
  -3 -11   9  100.89    5.20
  -3 -11   9  112.69    6.50
  -2 -11   9   13.50    1.50
  -2 -11   9   16.70    2.90
  -1 -11   9   71.69    4.20
   0 -11   9   81.69    4.70
   1 -11   9   68.79    4.30
   2 -11   9   48.40    3.60
   3 -11   9   53.39    4.10
   3 -11   9   65.19    4.40
   4 -11   9  106.39    6.10
   4 -11   9  112.59    6.20
   5 -11   9   56.79    4.50
   5 -11   9   47.20    3.90
   6 -11   9   16.00    3.10
   6 -11   9   14.20    3.00
  -7 -10   9  100.39    4.90
  -7 -10   9   91.29    6.20
  -6 -10   9    8.10    1.60
  -6 -10   9    5.70    1.90
  -5 -10   9   83.69    5.40
  -5 -10   9   79.29    4.20
  -4 -10   9  236.88    9.20
  -3 -10   9   74.09    4.10
  -2 -10   9    4.10    1.00
  -1 -10   9  244.78    9.60
   0 -10   9  314.67   11.90
   1 -10   9    3.80    1.30
   2 -10   9   65.69    4.20
   3 -10   9  376.26   14.00
   3 -10   9  395.36   14.50
   4 -10   9   68.19    4.60
   4 -10   9   70.79    4.60
   5 -10   9    9.20    2.10
   5 -10   9    3.40    1.60
   6 -10   9  154.88    7.90
   6 -10   9  162.58    8.20
   7 -10   9   52.99    4.20
   7 -10   9   56.09    4.80
   8   9  -9  169.98   10.80
  -8  -9   9  188.58    9.10
  -8  -9   9  182.58    7.60
   7   9  -9   13.00    2.10
  -7  -9   9   16.30    2.80
  -7  -9   9   13.30    3.30
  -6  -9   9   71.59    4.10
  -6  -9   9   70.29    5.00
  -5  -9   9  362.66   13.90
  -5  -9   9  349.77   12.70
  -4  -9   9  444.56   16.60
  -4  -9   9  473.25   15.70
  -3  -9   9   17.90    1.90
  -2  -9   9  359.46   12.80
  -1  -9   9  867.31   27.50
   0  -9   9  215.48    8.70
   1  -9   9   56.49    4.30
   2  -9   9  402.06   14.10
   2  -9   9  415.76   14.80
   3  -9   9  226.28    9.20
   3  -9   9  233.38    9.60
   4  -9   9   13.80    2.30
   4  -9   9   10.30    2.10
   5  -9   9  204.88    9.00
   5  -9   9  196.08    9.00
  -6   9  -9  356.16   11.70
   6  -9   9  348.47   13.70
   6  -9   9  346.27   13.90
  -7   9  -9   43.60    3.00
   7  -9   9   44.30    4.10
   8   8  -9   66.69    4.40
  -8  -8   9   66.09    4.80
   7   8  -9   27.90    2.60
  -7  -8   9   23.50    3.20
   6   8  -9  267.97   10.00
  -6  -8   9  259.77   10.80
  -6  -8   9  252.47    9.90
  -5  -8   9  333.77   13.70
  -5  -8   9  338.37   12.10
  -4  -8   9   22.30    2.10
  -3  -8   9  107.99    5.20
   2   8  -9  586.24   19.10
  -2  -8   9  531.85   18.40
   1   8  -9  314.37    9.70
  -1  -8   9  279.97    9.60
  -1  -8   9  316.77   11.20
   0  -8   9  360.96   12.90
   1  -8   9  512.95   17.50
   2  -8   9  185.28    7.40
   2  -8   9  178.18    8.30
   3  -8   9   33.10    2.80
   3  -8   9   30.90    2.70
  -4   8  -9  162.38    5.90
  -4   8  -9  162.58    6.10
   4  -8   9  166.58    7.60
   4  -8   9  163.98    7.40
  -5   8  -9  227.88    8.00
   5  -8   9  215.88    9.50
   5  -8   9  219.28    9.50
  -6   8  -9  168.78    6.80
   6  -8   9  165.18    7.90
   6  -8   9  167.18    8.10
  -7   8  -9   39.20    3.10
   7  -8   9   39.00    3.50
   7  -8   9   40.10    3.80
   9   7  -9   16.60    2.80
  -9  -7   9   21.20    3.00
   8   7  -9    9.10    1.80
   7   7  -9  149.39    6.60
  -7  -7   9  136.89    6.80
   6   7  -9  251.27    9.50
  -6  -7   9  251.87   10.10
   5   7  -9   38.50    2.60
   4   7  -9  170.68    7.00
   3   7  -9  190.68    7.20
  -3  -7   9  178.68    7.40
   2   7  -9  295.87    9.90
  -2  -7   9  282.17   10.50
   1   7  -9   93.29    3.80
  -1  -7   9   87.99    3.70
  -1  -7   9   95.69    4.70
   0   7  -9  326.37   10.40
   0  -7   9  321.27   11.70
  -1   7  -9  515.35   16.40
   1  -7   9  552.04   17.20
   1  -7   9  547.85   18.10
  -2   7  -9  241.48    8.10
   2  -7   9  245.78    9.60
   2  -7   9  246.68    9.00
  -3   7  -9   67.39    3.00
   3  -7   9   57.19    3.60
   3  -7   9   58.09    3.90
  -4   7  -9  353.86   11.70
   4  -7   9  353.26   12.80
   4  -7   9  341.67   13.00
  -5   7  -9   45.40    2.80
   5  -7   9   39.60    3.30
   5  -7   9   41.10    3.30
  -6   7  -9   15.10    2.10
   6  -7   9   15.30    2.60
   6  -7   9   19.10    2.80
  -7   7  -9  120.19    5.70
   7  -7   9  102.39    6.20
   7  -7   9  106.49    6.00
   9   6  -9   36.50    3.10
  -9  -6   9   34.40    3.10
   8   6  -9    8.90    1.80
  -8  -6   9   14.00    2.20
   7   6  -9   19.30    2.20
  -7  -6   9   24.80    2.50
   6   6  -9   27.90    3.10
   6   6  -9   31.00    2.30
  -6  -6   9   31.00    2.60
   5   6  -9    9.10    1.70
   5   6  -9    7.20    1.20
   4   6  -9  104.49    5.00
   3   6  -9  235.48    8.60
   2   6  -9   17.00    1.50
  -2  -6   9   15.40    1.60
   1   6  -9  192.18    6.90
  -1  -6   9  191.98    7.70
   0   6  -9  308.07   10.00
   0  -6   9  297.47   10.90
   0  -6   9  294.97    9.70
  -1   6  -9  120.99    4.80
   1  -6   9  129.29    5.00
   1  -6   9  121.69    5.60
   2  -6   9    3.50    0.90
   2  -6   9    3.20    1.10
  -3   6  -9   69.09    3.30
   3  -6   9   65.29    3.90
   3  -6   9   61.69    3.60
  -4   6  -9   36.20    2.60
   4  -6   9   48.40    3.30
   4  -6   9   42.90    3.10
  -5   6  -9    7.10    1.50
   5  -6   9    5.80    1.70
   5  -6   9    5.70    1.50
  -6   6  -9   82.29    4.50
   6  -6   9   73.79    4.60
   6  -6   9   67.09    4.60
  -7   6  -9   21.70    2.60
   7  -6   9   21.10    2.80
   7  -6   9   23.60    3.20
   9   5  -9   69.29    4.50
  -9  -5   9   79.69    4.10
   8   5  -9    8.70    1.80
  -8  -5   9   12.70    1.80
   7   5  -9  120.69    6.30
   7   5  -9  119.19    5.70
  -7  -5   9  105.59    5.20
   6   5  -9  148.19    6.10
   5   5  -9  128.49    5.20
   5   5  -9  127.89    6.00
   4   5  -9  179.08    6.30
   4   5  -9  167.88    7.10
   3   5  -9  519.45   16.90
   2   5  -9  180.88    6.80
  -2  -5   9  171.18    6.00
   1   5  -9   89.79    3.90
  -1  -5   9   79.09    4.10
  -1  -5   9   85.69    3.20
   0   5  -9  312.97   10.50
   0  -5   9  310.37   11.20
   0  -5   9  315.97   10.00
  -1   5  -9  154.58    6.00
   1  -5   9  159.18    5.90
   1  -5   9  169.88    6.80
  -2   5  -9   54.79    2.90
   2  -5   9   55.89    3.00
   2  -5   9   56.29    3.40
  -3   5  -9   34.10    2.30
   3  -5   9   30.00    2.40
   3  -5   9   30.80    2.60
  -4   5  -9   51.09    3.10
   4  -5   9   40.30    3.00
  -5   5  -9   84.49    4.60
   5  -5   9   93.19    5.00
   5  -5   9  101.19    5.20
  -6   5  -9    3.00    1.20
   6  -5   9    1.70    1.00
   6  -5   9    2.70    1.10
   7  -5   9   38.00    3.40
   7  -5   9   44.00    3.50
  10   4  -9   47.00    3.80
   9   4  -9   18.00    2.60
   8   4  -9   79.59    4.50
   8   4  -9   86.09    5.40
  -8  -4   9   75.79    3.80
   7   4  -9  380.46   14.50
   7   4  -9  378.56   13.30
  -7  -4   9  391.06   13.00
   6   4  -9  165.08    6.50
   6   4  -9  163.28    8.30
   5   4  -9   91.69    4.90
   5   4  -9   90.29    3.90
   4   4  -9  312.67   10.00
   4   4  -9  303.97   11.20
   3   4  -9  501.65   16.40
  -3  -4   9  485.75   15.20
   2   4  -9  120.29    5.10
  -2  -4   9  116.99    4.10
   1   4  -9  672.33   21.00
  -1  -4   9  659.93   19.80
  -1  -4   9  679.53   21.50
   0   4  -9  562.74   18.10
   0  -4   9  585.14   18.60
   0  -4   9  561.24   17.10
  -1   4  -9  394.06   13.10
   1  -4   9  410.36   13.70
   1  -4   9  390.76   12.50
  -2   4  -9   54.09    3.10
   2  -4   9   62.29    3.50
   2  -4   9   62.39    3.30
  -3   4  -9  239.38    9.00
   3  -4   9  237.38    9.30
   3  -4   9  250.77    8.90
  -4   4  -9  448.26   15.30
   4  -4   9  448.76   15.40
   4  -4   9  443.06   15.10
  -5   4  -9   72.09    4.30
   5  -4   9   73.69    4.30
   5  -4   9   68.49    4.10
  -6   4  -9   72.29    4.60
   6  -4   9   74.69    4.50
   6  -4   9   69.49    4.20
   7  -4   9  123.89    6.20
   7  -4   9  129.49    6.70
  10   3  -9   34.70    3.50
   9   3  -9   36.30    3.70
   9   3  -9   38.00    3.20
   8   3  -9  177.28    7.50
   8   3  -9  170.98    8.40
   7   3  -9  170.78    8.10
   7   3  -9  177.38    7.10
  -7  -3   9  170.68    6.50
   6   3  -9   83.79    5.50
   6   3  -9   90.79    4.10
   5   3  -9  476.15   16.60
   5   3  -9  480.65   15.20
   4   3  -9  500.85   14.90
   4   3  -9  475.55   16.40
  -4  -3   9  477.05   15.20
   3   3  -9  171.38    7.00
  -3  -3   9  176.38    5.80
   2   3  -9  242.18    9.00
   1   3  -9 1040.90   31.90
   0   3  -9  850.51   26.30
   0   3  -9  842.52   26.00
   0  -3   9  829.62   26.20
  -1   3  -9  252.77    9.30
  -1   3  -9  255.47    9.10
   1  -3   9  248.48    9.20
   1  -3   9  241.18    8.00
  -2   3  -9  215.38    8.60
  -2   3  -9  203.88    8.20
   2  -3   9  235.78    8.60
   2  -3   9  232.48    7.70
  -3   3  -9  876.01   27.10
  -3   3  -9  870.11   27.30
   3  -3   9  827.62   26.40
   3  -3   9  867.81   27.10
  -4   3  -9  219.98    8.90
  -4   3  -9  218.98    8.90
   4  -3   9  222.78    8.50
   4  -3   9  233.08    8.80
  -5   3  -9   87.89    4.80
  -5   3  -9   89.69    5.00
   5  -3   9   85.29    4.60
   5  -3   9   85.79    5.10
  -6   3  -9  300.97   12.00
  -6   3  -9  304.27   11.50
   6  -3   9  293.87   11.20
   6  -3   9  304.17   11.60
  -7   3  -9  160.48    7.90
   7  -3   9  150.38    7.40
   7  -3   9  158.78    6.90
  10   2  -9    6.30    1.60
   9   2  -9   94.19    6.10
   9   2  -9   99.19    5.20
   8   2  -9   76.89    4.30
   8   2  -9   73.89    5.10
   7   2  -9   63.49    4.40
   7   2  -9   60.69    3.50
   6   2  -9  140.49    5.60
   5   2  -9  328.27   12.20
   5   2  -9  335.47   10.90
   4   2  -9  176.08    7.40
   4   2  -9  180.38    5.90
  -4  -2   9  164.48    6.00
   3   2  -9  261.37    9.80
   2   2  -9  677.23   21.60
   2   2  -9  672.83   21.30
   1   2  -9 1132.79   34.70
   1   2  -9 1134.69   34.60
   0   2  -9   92.99    4.60
   0   2  -9   94.29    4.50
   0  -2   9   94.39    4.50
  -1   2  -9  322.37   11.60
  -1   2  -9  330.87   11.80
   1  -2   9  333.87   10.10
   1  -2   9  333.97   11.60
  -2   2  -9  381.86   13.00
  -2   2  -9  429.76   14.50
  -2   2  -9  428.46   14.40
   2  -2   9  437.06   14.20
   2  -2   9  410.76   13.10
  -3   2  -9  284.77   10.60
  -3   2  -9  274.57   10.90
   3  -2   9  272.97    9.50
   3  -2   9  280.27   10.20
  -4   2  -9   61.69    3.90
  -4   2  -9   61.59    4.90
   4  -2   9   61.29    3.40
   4  -2   9   60.79    3.50
  -5   2  -9  367.26   13.80
  -5   2  -9  365.86   13.50
   5  -2   9  354.26   12.70
   5  -2   9  366.36   12.90
  -6   2  -9  202.58    9.10
  -6   2  -9  200.78    8.50
   6  -2   9  182.88    8.50
   6  -2   9  191.38    8.30
  -7   2  -9   32.00    3.00
  -7   2  -9   31.80    3.30
   7  -2   9   28.00    2.50
   7  -2   9   26.60    2.80
  10   1  -9   24.50    3.40
  10   1  -9   23.40    3.70
   9   1  -9   57.89    4.80
   9   1  -9   60.59    4.00
   8   1  -9   11.40    2.40
   7   1  -9   53.09    3.10
   7   1  -9   52.09    3.80
  -7  -1   9   41.10    2.40
   6   1  -9   80.09    3.80
   6   1  -9   79.89    5.00
   5   1  -9  232.08    7.90
   5   1  -9  231.78    9.40
   4   1  -9   41.20    1.90
   4   1  -9   40.40    2.90
   3   1  -9  242.48    9.40
   3   1  -9  247.88    8.80
   2   1  -9  442.56   15.00
   2   1  -9  436.66   14.60
   1   1  -9   73.49    3.90
   1   1  -9   70.09    3.80
   0   1  -9  153.48    6.50
   0   1  -9  156.78    6.60
  -1   1  -9  656.33   21.60
  -1   1  -9  659.73   21.80
   1  -1   9  691.83   21.30
  -2   1  -9  349.37   12.10
  -2   1  -9  302.27   10.40
  -2   1  -9  331.37   11.80
   2  -1   9  321.17   11.20
   2  -1   9  306.47   10.30
  -3   1  -9   52.69    3.60
  -3   1  -9   53.69    3.70
   3  -1   9   55.99    2.90
   3  -1   9   58.49    3.20
  -4   1  -9  127.59    6.30
  -4   1  -9  116.89    6.10
   4  -1   9  126.89    5.40
   4  -1   9  122.39    5.40
  -5   1  -9  130.99    6.70
  -5   1  -9  119.69    6.10
   5  -1   9  114.99    5.60
   5  -1   9  121.19    5.40
  -6   1  -9    1.70    1.40
  -6   1  -9    4.70    1.40
   6  -1   9    3.70    1.30
   6  -1   9    6.20    1.40
  -7   1  -9   29.00    3.60
  -7   1  -9   29.60    3.00
   7  -1   9   25.90    2.80
   7  -1   9   30.70    4.20
  10   0  -9    5.10    1.80
  10   0  -9    4.50    1.60
   9   0  -9   47.10    3.50
   9   0  -9   43.20    4.10
   8   0  -9   42.80    3.80
   8   0  -9   46.70    3.70
   7   0  -9   23.40    2.60
   7   0  -9   27.00    2.30
   6   0  -9   44.30    2.70
   6   0  -9   49.50    3.60
   5   0  -9   94.79    5.10
   5   0  -9   89.19    4.20
   4   0  -9   19.90    2.00
   4   0  -9   17.70    1.60
   4   0  -9   16.40    1.10
   3   0  -9  155.58    6.90
   3   0  -9  163.78    6.40
   2   0  -9  486.15   16.00
   2   0  -9  473.45   16.30
   1   0  -9  139.79    6.20
   1   0  -9  141.99    6.30
   0   0  -9  182.68    7.70
   0   0  -9  186.08    7.60
  -1   0  -9   65.29    3.90
  -1   0  -9   58.09    2.60
  -1   0  -9   68.39    4.10
   1   0   9   63.69    2.40
   1   0   9   65.59    3.40
  -2   0  -9  148.19    6.70
  -2   0  -9  147.09    7.10
   2   0   9  143.09    5.90
  -3   0  -9  130.99    6.40
  -3   0  -9  130.69    6.40
   3   0   9  128.09    5.20
   3   0   9  131.39    5.50
  -4   0  -9   36.50    3.20
  -4   0  -9   39.90    3.30
   4   0   9   35.20    2.50
   4   0   9   31.80    2.30
  -5   0  -9   15.10    2.60
  -5   0  -9   11.50    2.40
   5   0   9   13.50    1.70
   5   0   9   14.10    2.40
  -6   0  -9   17.30    2.80
   6   0   9   20.50    2.30
   6   0   9   23.50    2.00
  10  -1  -9   27.30    3.50
  10  -1  -9   25.60    3.20
   9  -1  -9  147.59    7.10
   9  -1  -9  161.88    8.30
   8  -1  -9   43.00    3.70
   8  -1  -9   42.60    3.80
   7  -1  -9    9.00    1.60
   7  -1  -9   10.50    2.10
   6  -1  -9  301.67   12.00
   6  -1  -9  314.27   10.60
   5  -1  -9  259.17   10.90
   5  -1  -9  271.97    9.20
   5  -1  -9  270.67    9.10
   4  -1  -9   24.80    2.50
   4  -1  -9   28.00    2.10
   4  -1  -9   29.40    1.60
   3  -1  -9  385.16   13.30
   3  -1  -9  396.06   14.00
   2  -1  -9  380.56   13.40
   2  -1  -9  394.86   13.90
   1  -1  -9   99.19    5.00
   1  -1  -9  103.09    5.20
   0  -1  -9   62.19    3.90
   0  -1  -9   60.99    3.90
  -1  -1  -9  256.47   10.20
  -1  -1  -9  239.58    8.40
  -1  -1  -9  281.47   13.50
   1   1   9  273.87    9.40
  -2  -1  -9  230.18    9.30
  -2  -1  -9  221.48    9.40
   2   1   9  217.98    7.60
   2   1   9  221.58    8.10
  -3  -1  -9   49.00    3.60
  -3  -1  -9   46.60    3.60
   3   1   9   43.90    2.60
   3   1   9   47.00    2.70
  -4  -1  -9   39.30    3.60
  -4  -1  -9   40.10    3.70
   4   1   9   52.09    3.00
   4   1   9   51.49    2.80
  -5  -1  -9  127.39    7.00
  -5  -1  -9  130.19    7.20
   5   1   9  137.59    6.10
   5   1   9  134.09    5.30
  -6  -1  -9   28.20    3.40
  -6  -1  -9   30.20    3.10
   6   1   9   30.70    2.70
  10  -2  -9   70.89    5.50
  10  -2  -9   75.69    4.90
   9  -2  -9   52.89    3.90
   9  -2  -9   46.90    4.20
   8  -2  -9   51.39    4.20
   7  -2  -9  137.39    6.90
   7  -2  -9  137.89    5.90
  -7   2   9  119.29    4.80
   6  -2  -9  256.67   10.80
   6  -2  -9  262.07    9.30
   5  -2  -9   20.40    1.80
   5  -2  -9   22.50    2.50
   5  -2  -9   22.20    1.80
   4  -2  -9  337.47   10.60
   4  -2  -9  331.27   11.60
   4  -2  -9  322.17   12.50
   3  -2  -9  458.55   15.30
   3  -2  -9  436.26   15.80
   2  -2  -9  337.37   12.70
   2  -2  -9  342.87   12.40
   1  -2  -9   74.49    4.40
   1  -2  -9   79.89    4.50
   0  -2  -9  787.42   28.00
   0  -2  -9  778.02   25.60
  -1  -2  -9  451.65   17.20
  -1  -2  -9  496.65   17.30
   1   2   9  522.35   16.00
  -2  -2  -9  108.29    5.80
  -2  -2  -9   95.69    5.70
   2   2   9  109.39    4.60
  -3  -2  -9  268.97   11.10
  -3  -2  -9  261.77   10.90
   3   2   9  256.67    9.20
   3   2   9  259.87    9.00
  -4  -2  -9  152.68    7.70
  -4  -2  -9  153.38    7.90
   4   2   9  151.58    5.80
   4   2   9  159.58    6.40
  -5  -2  -9  133.19    7.30
  -5  -2  -9  129.59    7.00
   5   2   9  115.49    5.70
  -6  -2  -9   46.80    5.50
  -6  -2  -9   50.39    4.50
   6   2   9   49.50    3.50
   9  -3  -9    7.80    1.90
   9  -3  -9    6.60    2.10
   8  -3  -9   85.69    4.80
   8  -3  -9   91.09    5.80
   7  -3  -9  163.08    6.80
   7  -3  -9  151.88    7.70
   6  -3  -9  101.79    4.60
   6  -3  -9   90.29    4.00
   6  -3  -9   84.19    5.30
   5  -3  -9  198.68    7.40
   5  -3  -9  205.88    9.00
   5  -3  -9  199.28    7.70
   4  -3  -9  298.57   10.80
   4  -3  -9  310.57   10.90
   4  -3  -9  283.37   11.60
   3  -3  -9  237.58    8.10
   3  -3  -9  282.37   12.50
   3  -3  -9  261.57    8.50
   3  -3  -9  257.47    9.90
   2  -3  -9    1.50    1.10
   1  -3  -9   82.19    4.80
   1  -3  -9   78.59    3.20
   1  -3  -9   82.49    4.90
   0  -3  -9  561.34   19.50
   0  -3  -9  579.24   19.40
   0  -3  -9  529.55   17.20
  -1  -3  -9  182.48    8.70
  -1  -3  -9  187.28    8.50
   1   3   9  205.08    7.30
  -2  -3  -9  219.58    9.80
  -2  -3  -9  216.08    9.50
   2   3   9  212.68    7.70
  -3  -3  -9  309.57   12.70
  -3  -3  -9  313.57   12.50
   3   3   9  290.67   10.00
  -4  -3  -9  254.47   11.50
  -4  -3  -9  254.37   11.40
   4   3   9  289.57   10.80
  -5  -3  -9   34.60    4.10
   5   3   9   33.30    2.80
   9  -4  -9   34.10    3.20
   9  -4  -9   32.60    4.80
   8  -4  -9   40.30    3.90
   8  -4  -9   41.00    3.20
   7  -4  -9   68.39    4.80
   7  -4  -9   62.89    3.90
   6  -4  -9   49.50    2.90
   6  -4  -9   51.19    3.20
   6  -4  -9   55.99    4.20
   5  -4  -9  188.88    8.50
   5  -4  -9  175.58    6.90
   5  -4  -9  175.28    7.20
   4  -4  -9   58.39    3.70
   4  -4  -9   65.69    3.20
   4  -4  -9   55.59    4.10
   3  -4  -9   21.90    2.50
   3  -4  -9   24.80    2.60
   3  -4  -9   26.20    2.80
   2  -4  -9  296.57   11.50
   2  -4  -9  282.27   11.20
   2  -4  -9  264.57    9.50
   1  -4  -9   74.19    4.70
   1  -4  -9   75.19    4.80
   0  -4  -9  199.68    9.20
   0  -4  -9  200.98    8.90
  -1  -4  -9   24.40    2.90
  -1  -4  -9   17.90    2.80
   1   4   9   18.10    1.70
  -2  -4  -9   98.99    5.90
  -2  -4  -9   92.99    5.60
   2   4   9   80.89    3.70
  -3  -4  -9  194.88    9.50
  -3  -4  -9  188.58    9.20
  -4  -4  -9   41.50    4.40
  -4  -4  -9   42.60    4.40
   9  -5  -9    6.40    1.90
   9  -5  -9    3.00    1.70
   8  -5  -9   25.50    2.90
   8  -5  -9   27.80    3.40
   7  -5  -9   13.80    2.60
   7  -5  -9   13.90    1.60
   7  -5  -9   10.40    2.30
   6  -5  -9   51.39    3.40
   6  -5  -9   54.69    4.30
   6  -5  -9   49.30    3.10
   5  -5  -9   70.99    4.90
   5  -5  -9   69.39    4.20
   5  -5  -9   75.09    3.90
   4  -5  -9   -1.20    1.00
   4  -5  -9    1.20    1.00
   4  -5  -9   -0.80    0.80
   3  -5  -9   51.49    3.90
   3  -5  -9   45.70    3.70
   3  -5  -9   45.30    2.70
   2  -5  -9   72.39    4.80
   2  -5  -9   76.79    4.90
   1  -5  -9   93.49    5.50
   1  -5  -9   89.29    5.50
   0  -5  -9   19.80    3.10
   0  -5  -9   15.50    2.50
  -1  -5  -9   92.49    6.00
  -1  -5  -9   85.29    5.50
   1   5   9   94.39    4.10
  -2  -5  -9   45.80    4.00
  -2  -5  -9   42.70    4.10
  -3  -5  -9   33.20    3.60
  -3  -5  -9   31.00    5.30
  -4  -5  -9   19.80    3.50
  -4  -5  -9   16.90    3.10
   8  -6  -9   27.10    3.10
   8  -6  -9   25.50    3.80
   7  -6  -9   37.30    3.60
   7  -6  -9   31.90    2.40
   7  -6  -9   33.00    3.10
   6  -6  -9    0.50    1.20
   6  -6  -9   -0.20    1.00
   6  -6  -9   -0.20    1.00
   5  -6  -9   11.60    2.50
   5  -6  -9   10.50    2.10
   5  -6  -9    7.60    1.70
   4  -6  -9   87.29    5.60
   4  -6  -9   76.69    4.90
   4  -6  -9   89.69    4.30
   3  -6  -9    1.50    1.30
   3  -6  -9    0.70    1.30
   3  -6  -9    0.90    1.00
   2  -6  -9   14.80    2.70
   2  -6  -9   10.80    2.30
   1  -6  -9   77.99    5.50
   1  -6  -9   87.49    5.40
   0  -6  -9   62.99    5.00
   0  -6  -9   72.09    4.90
  -1  -6  -9   15.00    2.70
  -1  -6  -9   16.20    3.10
   1   6   9   13.00    1.50
  -2  -6  -9   41.50    4.10
  -2  -6  -9   41.80    7.30
  -3  -6  -9   36.40    3.80
  -3  -6  -9   32.70    4.00
   7  -7  -9    1.20    1.40
   7  -7  -9    1.50    1.50
   7  -7  -9    1.20    1.40
   6  -7  -9   45.00    4.10
   6  -7  -9   42.20    3.40
   6  -7  -9   44.00    3.30
   5  -7  -9  168.78    7.10
   5  -7  -9  162.18    8.40
   5  -7  -9  166.48    7.70
   4  -7  -9   82.99    5.40
   4  -7  -9   72.29    4.10
   4  -7  -9   72.59    4.90
   3  -7  -9   29.20    3.30
   3  -7  -9   33.30    3.50
   3  -7  -9   28.10    2.50
   2  -7  -9  114.69    6.80
   2  -7  -9  121.99    6.90
   1  -7  -9  105.99    6.50
   1  -7  -9  106.19    6.40
   0  -7  -9    2.00    1.40
   0  -7  -9    1.20    1.40
  -1  -7  -9   80.99    6.10
  -1  -7  -9   92.09    8.90
  -2  -7  -9  143.39    8.10
   6  -8  -9  143.89    7.00
   6  -8  -9  146.79    8.30
   6  -8  -9  141.29    6.90
   5  -8  -9   74.19    5.10
   5  -8  -9   79.99    4.70
   5  -8  -9   78.19    5.40
   4  -8  -9   14.90    2.70
   4  -8  -9   22.00    3.30
   4  -8  -9   14.30    2.20
   3  -8  -9  133.49    7.40
   3  -8  -9  125.49    7.10
   2  -8  -9  172.38    8.90
   2  -8  -9  185.08    9.30
   1  -8  -9   69.49    6.00
   1  -8  -9   70.89    5.30
   0  -8  -9   52.99    4.60
   0  -8  -9   54.59    4.90
  -1 -15  10    4.70    1.70
  -1 -15  10    4.10    1.60
   0 -15  10   22.60    3.20
   0 -15  10   29.50    3.50
   1 -15  10   36.10    3.50
   1 -15  10   41.40    4.10
  -3 -14  10   59.39    4.10
  -3 -14  10   70.99    5.60
  -2 -14  10   71.69    4.50
  -2 -14  10   66.89    5.40
  -1 -14  10   93.59    5.30
   0 -14  10  245.18   12.10
   0 -14  10  253.17   10.60
   1 -14  10   85.59    5.40
   1 -14  10   85.29    5.90
   2 -14  10   14.20    2.40
   2 -14  10   17.20    3.00
   3 -14  10   85.39    5.70
   3 -14  10   87.39    6.20
   4 -14  10  100.99    6.30
   4 -14  10  102.59    6.50
  -4 -13  10  232.18    9.40
  -3 -13  10   83.09    6.10
  -3 -13  10  103.19    5.30
  -2 -13  10   21.60    2.40
  -2 -13  10   26.60    3.20
  -1 -13  10  195.68    9.60
  -1 -13  10  191.18    8.50
   0 -13  10  175.88    8.10
   1 -13  10   30.90    3.20
   2 -13  10  110.09    6.20
   3 -13  10  208.98    9.80
   3 -13  10  224.08   10.00
   4 -13  10   76.19    5.50
   4 -13  10   81.79    5.60
   5 -13  10   35.10    3.70
  -5 -12  10  177.48    9.50
  -5 -12  10  182.38    7.60
  -4 -12  10  131.79    6.30
  -4 -12  10  136.19    7.80
  -3 -12  10   21.40    3.30
  -3 -12  10   17.30    2.40
  -2 -12  10  121.59    6.00
  -2 -12  10  118.39    6.90
  -1 -12  10  168.08    7.70
   0 -12  10   45.10    3.50
   1 -12  10   64.99    4.40
   2 -12  10  283.37   11.60
   3 -12  10   79.29    5.10
   3 -12  10   78.89    5.10
   4 -12  10   15.40    2.80
   4 -12  10   23.50    3.30
   5 -12  10   76.59    5.50
   5 -12  10   78.59    5.40
  -6 -11  10   39.80    3.00
  -6 -11  10   37.50    4.10
  -5 -11  10   23.00    2.40
  -5 -11  10   20.20    3.30
  -4 -11  10    6.30    1.50
  -4 -11  10   10.50    2.30
  -3 -11  10   53.69    3.60
  -3 -11  10   58.69    4.50
  -2 -11  10   81.09    4.60
  -1 -11  10   84.49    4.80
   0 -11  10   17.80    2.70
   1 -11  10   64.59    4.30
   2 -11  10  104.09    5.50
   2 -11  10  107.69    5.90
   3 -11  10    3.60    1.40
   3 -11  10    0.20    1.20
   4 -11  10  107.49    6.10
   4 -11  10  106.39    6.20
   5 -11  10   77.39    5.10
   5 -11  10   75.59    5.20
   6 -11  10   19.30    3.20
   6 -11  10   18.70    3.20
  -7 -10  10    3.00    1.30
  -7 -10  10    3.80    1.70
  -6 -10  10   32.10    3.60
  -6 -10  10   32.70    2.80
  -5 -10  10   96.29    5.20
  -5 -10  10  109.69    6.20
  -4 -10  10   20.20    3.00
  -4 -10  10   18.50    2.10
  -3 -10  10   -0.60    0.60
  -2 -10  10   75.59    4.40
  -1 -10  10  208.18    8.70
   0 -10  10   81.09    4.70
   1 -10  10   48.10    3.50
   2 -10  10  190.98    8.20
   2 -10  10  204.78    8.80
   3 -10  10   88.69    5.10
   3 -10  10   82.59    5.10
   4 -10  10   38.00    3.40
   4 -10  10   39.00    3.50
   5 -10  10   44.10    3.90
   5 -10  10   49.99    3.90
   6 -10  10   26.90    3.50
   8   9 -10   34.00    3.10
  -8  -9  10   25.60    3.60
  -8  -9  10   28.60    2.80
  -7  -9  10   18.60    2.90
  -7  -9  10   16.40    2.30
  -6  -9  10  105.99    5.50
  -6  -9  10  118.29    6.40
  -5  -9  10  244.18   10.40
  -5  -9  10  235.88    9.50
  -4  -9  10   40.80    3.80
  -3  -9  10   97.59    5.10
  -2  -9  10  643.54   21.40
  -1  -9  10  146.09    6.20
   0  -9  10   16.00    2.40
   1  -9  10  316.27   12.10
   2  -9  10  289.47   10.70
   2  -9  10  282.77   11.30
   3  -9  10    6.60    1.60
   3  -9  10    6.00    1.70
   4  -9  10   74.29    4.80
   4  -9  10   66.39    4.40
   5  -9  10  214.78    9.50
   5  -9  10  214.78    9.60
  -6   9 -10   26.20    2.40
   6  -9  10   24.20    3.40
   6  -9  10   28.60    3.10
  -7   9 -10    0.60    1.20
   7  -9  10    4.00    1.60
   7  -9  10    2.10    1.60
   8   8 -10   10.30    1.90
  -8  -8  10   11.80    2.40
   7   8 -10  202.78    8.20
  -7  -8  10  179.28    8.70
  -6  -8  10  384.06   14.50
   4   8 -10   48.90    3.20
  -4  -8  10   68.59    3.80
   3   8 -10  377.86   12.60
  -3  -8  10  358.86   13.20
   2   8 -10  277.87    9.70
  -2  -8  10  292.27   10.80
   1   8 -10  150.28    5.30
  -1  -8  10  138.99    6.40
  -1  -8  10  133.69    5.10
   0   8 -10  514.35   15.10
   0  -8  10  456.95   17.00
   1  -8  10  952.70   29.50
   1  -8  10  968.10   30.60
  -2   8 -10   23.40    1.50
   2  -8  10   22.20    2.20
   2  -8  10   21.30    2.30
  -3   8 -10   91.09    3.70
   3  -8  10   83.69    5.00
   3  -8  10   88.09    4.70
  -4   8 -10  574.04   17.50
   4  -8  10  533.65   19.00
   4  -8  10  552.04   19.40
  -5   8 -10  261.17    9.30
   5  -8  10  253.87   10.60
   5  -8  10  256.57   10.70
  -6   8 -10    5.40    1.40
   6  -8  10    6.70    1.80
   6  -8  10    9.50    2.10
  -7   8 -10  130.69    6.60
   7  -8  10  114.89    6.80
   9   7 -10    2.30    1.20
  -9  -7  10   -2.40    1.50
   8   7 -10   72.99    4.40
  -8  -7  10   76.59    4.90
   7   7 -10  255.77    9.90
  -6  -7  10  156.88    7.20
   5   7 -10  120.79    5.80
   4   7 -10  229.98    8.90
   3   7 -10  700.93   22.10
  -3  -7  10  695.03   22.70
   2   7 -10  156.18    6.20
  -2  -7  10  168.08    7.10
   1   7 -10  177.28    7.70
  -1  -7  10  175.38    7.50
   0   7 -10  246.98    8.60
   0  -7  10  266.07   10.00
  -1   7 -10  301.77   10.40
   1  -7  10  328.97   12.00
   1  -7  10  327.17   11.00
   2  -7  10   64.59    4.00
   2  -7  10   65.79    3.60
  -3   7 -10  545.05   17.40
   3  -7  10  546.45   18.90
   3  -7  10  555.84   18.30
  -4   7 -10  390.56   13.10
   4  -7  10  383.46   14.00
   4  -7  10  401.66   14.50
  -5   7 -10   44.00    3.00
   5  -7  10   52.29    3.80
   5  -7  10   48.30    3.60
  -6   7 -10   62.99    3.90
   6  -7  10   75.59    4.80
   6  -7  10   66.49    4.50
  -7   7 -10  173.28    7.60
   7  -7  10  159.58    8.00
   7  -7  10  167.78    8.00
   9   6 -10    8.80    2.00
  -9  -6  10    3.20    1.70
   8   6 -10   90.19    4.90
  -8  -6  10   87.09    4.80
   7   6 -10   25.10    2.80
   7   6 -10   22.60    2.20
  -7  -6  10   22.90    2.50
   6   6 -10   23.10    2.00
   6   6 -10   19.00    2.20
   5   6 -10  170.68    7.60
   5   6 -10  180.78    6.80
   4   6 -10  235.98    9.10
   3   6 -10   95.79    4.60
   2   6 -10  211.68    7.80
  -2  -6  10  200.68    8.30
   1   6 -10  484.05   16.30
  -1  -6  10  538.55   17.40
   0  -6  10   41.80    2.60
   0  -6  10   43.40    3.00
  -1   6 -10   33.30    2.20
   1  -6  10   34.00    2.20
   1  -6  10   31.00    2.60
  -2   6 -10  271.47    9.60
   2  -6  10  280.07    9.80
   2  -6  10  278.67   11.20
  -3   6 -10  116.29    5.20
   3  -6  10  121.19    6.00
   3  -6  10  123.69    5.50
  -4   6 -10   55.09    3.30
   4  -6  10   58.69    3.90
   4  -6  10   56.79    3.60
  -5   6 -10  111.19    5.40
   5  -6  10  107.39    5.80
   5  -6  10  116.29    8.20
  -6   6 -10  158.28    7.20
   6  -6  10  162.18    7.50
   6  -6  10  153.98    7.40
  -7   6 -10   68.89    4.50
   7  -6  10   60.09    4.30
   7  -6  10   65.39    4.60
   9   5 -10   24.70    2.80
  -9  -5  10   29.00    2.60
   8   5 -10   20.00    2.20
   8   5 -10   20.00    3.10
  -8  -5  10   20.00    2.30
   7   5 -10   38.50    3.40
   7   5 -10   37.20    3.30
  -7  -5  10   31.00    2.60
   6   5 -10   75.59    3.80
   6   5 -10   79.69    4.70
   5   5 -10   33.90    2.80
   5   5 -10   29.90    2.00
   4   5 -10  134.59    6.10
   3   5 -10   59.19    3.40
   2   5 -10  170.78    6.70
  -2  -5  10  160.28    5.60
   1   5 -10   49.00    2.90
  -1  -5  10   48.90    3.10
   0   5 -10  181.38    7.10
   0  -5  10  200.28    7.90
   0  -5  10  189.18    6.50
  -1   5 -10   18.60    1.60
   1  -5  10   15.60    1.80
   1  -5  10   12.70    1.30
  -2   5 -10  106.59    4.80
   2  -5  10  104.99    5.30
   2  -5  10  108.49    4.60
  -3   5 -10    3.70    1.00
   3  -5  10    6.40    1.30
  -4   5 -10   21.70    2.10
   4  -5  10   18.70    2.00
   4  -5  10   21.60    2.30
  -5   5 -10  152.88    6.90
   5  -5  10  146.79    7.00
   5  -5  10  144.39    6.70
  -6   5 -10   45.50    3.60
   6  -5  10   46.30    3.60
   6  -5  10   44.30    3.50
  -7   5 -10    2.40    1.50
   7  -5  10    1.20    1.20
   7  -5  10    0.10    1.00
   9   4 -10   10.90    2.00
   8   4 -10  181.18    7.60
   8   4 -10  176.38    8.70
  -8  -4  10  181.38    7.00
   7   4 -10   62.39    4.40
   7   4 -10   61.19    3.50
   6   4 -10   11.80    1.40
   6   4 -10   13.40    2.20
   5   4 -10  251.87   10.10
   5   4 -10  256.27    8.70
   4   4 -10  141.99    6.40
   3   4 -10   58.19    3.40
   2   4 -10   83.69    4.20
   1   4 -10  212.38    8.30
  -1  -4  10  241.88    8.90
   0   4 -10  137.09    6.00
   0  -4  10  155.98    6.50
  -1   4 -10   53.29    3.00
   1  -4  10   47.20    2.30
   1  -4  10   48.40    3.20
  -2   4 -10   76.39    3.90
   2  -4  10   70.79    4.00
   2  -4  10   69.69    3.70
  -3   4 -10  181.18    7.50
  -3   4 -10  176.28    7.20
   3  -4  10  166.18    6.60
   3  -4  10  165.28    7.30
  -4   4 -10   63.09    3.80
   4  -4  10   60.19    3.50
   4  -4  10   54.09    3.70
  -5   4 -10   31.00    3.00
   5  -4  10   31.30    2.80
   5  -4  10   35.30    2.80
  -6   4 -10   40.10    3.50
   6  -4  10   50.99    3.60
   6  -4  10   49.60    3.60
  -7   4 -10   36.40    3.50
   7  -4  10   29.80    2.90
   7  -4  10   30.90    3.00
  10   3 -10   17.80    2.70
   9   3 -10  116.59    6.90
   9   3 -10  119.29    5.90
   8   3 -10  105.39    6.20
   8   3 -10  103.89    5.20
  -8  -3  10  104.49    4.40
   7   3 -10   17.20    1.80
   7   3 -10   19.90    2.60
   6   3 -10  126.69    6.40
   6   3 -10  126.89    5.20
   5   3 -10  458.65   16.10
   5   3 -10  459.25   14.40
   4   3 -10  257.57    9.80
   4   3 -10  257.37    8.00
  -4  -3  10  235.18    8.20
   3   3 -10   83.69    4.40
   2   3 -10  481.25   16.20
   1   3 -10  378.96   13.10
   0   3 -10   93.79    4.60
   0   3 -10   98.49    4.80
   0  -3  10  101.39    4.80
  -1   3 -10  349.47   12.70
  -1   3 -10  359.06   12.50
   1  -3  10  360.06   12.60
  -2   3 -10  477.25   16.00
  -2   3 -10  479.35   19.20
   2  -3  10  445.76   14.70
   2  -3  10  485.65   16.00
  -3   3 -10  451.65   15.30
  -3   3 -10  435.26   15.40
   3  -3  10  449.95   15.30
   3  -3  10  424.86   14.30
  -4   3 -10   89.49    5.50
  -4   3 -10   92.19    5.10
   4  -3  10   90.09    5.00
   4  -3  10   94.09    4.40
  -5   3 -10  124.69    6.30
  -5   3 -10  131.19    6.70
   5  -3  10  130.89    6.00
   5  -3  10  134.89    6.30
  -6   3 -10  213.58    9.40
  -6   3 -10  212.08    9.00
   6  -3  10  200.68    8.60
   6  -3  10  202.28    8.50
  -7   3 -10   18.20    3.00
   7  -3  10   13.90    2.50
   7  -3  10   14.70    2.20
  10   2 -10   61.49    5.10
  10   2 -10   69.49    4.70
   9   2 -10   98.09    5.30
   8   2 -10   66.49    4.80
  -8  -2  10   60.69    2.90
   7   2 -10   76.39    3.90
   7   2 -10   72.59    4.80
   6   2 -10  206.08    9.00
   6   2 -10  210.48    7.60
   5   2 -10  160.88    5.90
   5   2 -10  155.98    7.20
   4   2 -10   55.49    2.20
   4   2 -10   56.99    3.70
  -4  -2  10   53.09    2.40
   3   2 -10  464.35   16.00
   2   2 -10  731.73   23.30
   2   2 -10  717.83   23.00
   1   2 -10  290.47   10.70
   1   2 -10  282.17   10.40
   0   2 -10  193.58    7.90
   0   2 -10  189.98    7.80
   0  -2  10  199.28    7.80
  -1   2 -10  335.27   12.60
  -1   2 -10  352.36   12.60
   1  -2  10  367.66   12.50
  -2   2 -10  565.94   18.60
  -2   2 -10  574.34   18.90
   2  -2  10  554.44   18.30
   2  -2  10  529.75   17.00
  -3   2 -10  173.38    7.80
  -3   2 -10  173.88    7.80
   3  -2  10  182.88    7.40
   3  -2  10  180.38    6.60
  -4   2 -10  270.67   10.70
  -4   2 -10  258.57   10.60
   4  -2  10  261.67   10.00
   4  -2  10  265.47    9.50
  -5   2 -10  427.66   16.00
  -5   2 -10  431.36   15.80
   5  -2  10  436.16   14.90
  -6   2 -10   51.89    3.90
  -6   2 -10   49.90    4.20
   6  -2  10   60.99    3.80
   6  -2  10   51.69    3.50
  10   1 -10   70.79    5.40
  10   1 -10   66.89    4.50
   9   1 -10   44.40    3.40
   9   1 -10   42.20    4.10
   8   1 -10   48.80    4.00
   8   1 -10   45.40    3.20
   7   1 -10  145.79    7.40
   7   1 -10  147.29    6.10
   6   1 -10  201.28    7.30
   6   1 -10  201.18    8.80
   5   1 -10   29.00    3.10
   5   1 -10   29.50    1.70
   4   1 -10  220.08    9.10
   3   1 -10  459.15   15.10
   3   1 -10  450.75   15.80
   2   1 -10  297.57   10.90
   2   1 -10  308.47   11.30
   1   1 -10   33.80    2.60
   1   1 -10   35.30    2.70
   0   1 -10  469.35   16.40
   0   1 -10  483.05   16.50
   0  -1  10  493.65   16.20
  -1   1 -10  356.26   12.70
   1  -1  10  336.37   12.10
  -2   1 -10   77.19    4.50
  -2   1 -10   68.89    3.30
  -2   1 -10   76.99    4.60
   2  -1  10   80.09    4.10
   2  -1  10   78.59    3.20
  -3   1 -10  188.38    8.30
  -3   1 -10  181.18    8.10
   3  -1  10  191.78    7.60
   3  -1  10  186.88    6.90
  -4   1 -10  383.36   14.40
  -4   1 -10  373.66   14.10
   4  -1  10  377.96   12.90
   4  -1  10  379.76   13.20
  -5   1 -10   61.39    4.50
  -5   1 -10   60.79    4.20
   5  -1  10   54.59    3.40
   5  -1  10   52.69    4.00
  -6   1 -10   21.80    2.70
  -6   1 -10   24.90    3.20
   6  -1  10   23.80    2.50
  10   0 -10    6.90    1.90
  10   0 -10    4.70    2.10
   9   0 -10    5.00    1.50
   9   0 -10    2.40    1.50
   8   0 -10   52.19    4.30
   8   0 -10   52.19    3.40
   7   0 -10  114.79    6.30
   7   0 -10  102.49    4.80
   6   0 -10   45.40    2.60
   6   0 -10   48.70    3.70
   5   0 -10  107.29    5.70
   5   0 -10  111.69    4.20
   4   0 -10  242.68    8.80
   4   0 -10  236.38    9.80
   3   0 -10  146.19    6.30
   3   0 -10  151.68    6.90
   2   0 -10   72.39    4.10
   2   0 -10   79.39    4.50
   1   0 -10  504.95   17.10
   1   0 -10  492.75   17.10
   0   0 -10  200.78    8.30
   0   0 -10  192.68    8.80
  -1   0 -10    2.80    1.10
  -1   0 -10    6.40    1.60
   1   0  10    3.80    1.10
  -2   0 -10   62.59    4.20
  -2   0 -10   63.09    4.10
   2   0  10   57.39    3.40
  -3   0 -10  161.78    7.60
  -3   0 -10  160.48    7.70
   3   0  10  164.78    6.10
   3   0  10  159.88    6.60
  -4   0 -10   59.99    4.30
  -4   0 -10   68.19    4.60
   4   0  10   60.99    3.30
   4   0  10   53.69    3.30
  -5   0 -10    5.50    1.60
  -5   0 -10    3.60    1.70
   5   0  10    3.00    1.10
   5   0  10    4.90    1.20
  -6   0 -10   68.29    4.70
   6   0  10   65.09    4.10
   6   0  10   56.99    3.40
   9  -1 -10   21.00    3.40
   9  -1 -10   24.80    2.60
   8  -1 -10   11.10    2.30
   8  -1 -10   11.10    1.60
   7  -1 -10   63.89    3.50
   7  -1 -10   64.09    4.50
   6  -1 -10  159.78    6.10
   6  -1 -10  156.58    7.70
   5  -1 -10   63.79    3.40
   5  -1 -10   71.49    4.50
   5  -1 -10   70.79    3.00
   4  -1 -10   41.60    2.80
   4  -1 -10   40.50    3.60
   3  -1 -10  162.58    7.30
   3  -1 -10  153.28    6.70
   2  -1 -10    9.60    1.90
   2  -1 -10   11.30    1.90
   1  -1 -10   20.20    2.30
   1  -1 -10   18.80    2.20
   0  -1 -10  148.09    7.10
   0  -1 -10  153.58    9.70
  -1  -1 -10   35.70    3.20
  -1  -1 -10   37.60    3.20
   1   1  10   38.50    2.70
  -2  -1 -10   47.10    3.80
  -2  -1 -10   45.10    3.50
   2   1  10   46.90    2.90
  -3  -1 -10   52.59    4.10
  -3  -1 -10   59.19    4.30
   3   1  10   63.49    3.40
   3   1  10   61.59    3.10
  -4  -1 -10   10.40    2.30
  -4  -1 -10   14.80    2.70
   4   1  10   15.40    1.90
   4   1  10   16.20    1.80
  -5  -1 -10   21.60    3.30
  -5  -1 -10   20.00    3.10
   5   1  10   21.70    2.00
   5   1  10   21.90    2.30
   9  -2 -10    1.50    1.60
   9  -2 -10   -0.20    1.10
   8  -2 -10   57.89    4.60
   8  -2 -10   64.99    3.80
   7  -2 -10  198.28    9.30
   7  -2 -10  203.78    7.80
   6  -2 -10   15.30    1.60
   6  -2 -10   12.00    2.30
   5  -2 -10   59.99    4.20
   5  -2 -10   57.59    3.30
   4  -2 -10  185.58    8.50
   4  -2 -10  187.28    7.60
   3  -2 -10  128.39    6.50
   3  -2 -10  129.29    6.10
   2  -2 -10    7.80    1.70
   2  -2 -10    6.40    1.70
   1  -2 -10   96.09    5.30
   1  -2 -10   93.69    5.20
   0  -2 -10  430.96   15.70
   0  -2 -10  428.16   15.60
  -1  -2 -10  137.59    7.00
  -1  -2 -10  147.09    7.20
   1   2  10  141.89    6.00
  -2  -2 -10   25.70    3.00
  -2  -2 -10   34.80    3.20
   2   2  10   30.20    2.30
  -3  -2 -10  165.78    8.20
  -3  -2 -10  162.28    8.10
   3   2  10  166.48    6.40
   3   2  10  163.18    6.40
  -4  -2 -10   84.69    5.60
  -4  -2 -10   90.59    5.80
   4   2  10   81.59    3.90
   4   2  10   89.89    4.40
  -5  -2 -10   -0.10    1.40
  -5  -2 -10    2.30    1.60
   5   2  10    2.00    1.20
   9  -3 -10   51.99    3.80
   9  -3 -10   48.80    4.70
   8  -3 -10  104.59    6.40
   8  -3 -10   92.79    5.00
   7  -3 -10   75.19    4.00
   7  -3 -10   74.29    5.10
   6  -3 -10   49.20    2.90
   6  -3 -10   49.10    4.00
   6  -3 -10   47.50    2.80
   5  -3 -10  281.87   11.80
   5  -3 -10  284.27   10.40
   5  -3 -10  292.77    9.80
   4  -3 -10  298.37   11.30
   4  -3 -10  316.67   10.00
   4  -3 -10  304.07   12.30
   3  -3 -10  239.28   10.10
   2  -3 -10   90.69    5.50
   2  -3 -10   95.99    5.20
   1  -3 -10  176.58    8.20
   1  -3 -10  182.18    8.30
   0  -3 -10  176.98    6.70
   0  -3 -10  217.58    9.10
   0  -3 -10  213.48    9.30
  -1  -3 -10   71.79    5.00
  -1  -3 -10   77.59    5.00
   1   3  10   74.89    3.80
  -2  -3 -10  170.88    8.50
  -2  -3 -10  178.08    8.50
   2   3  10  173.28    6.60
  -3  -3 -10  321.57   13.50
  -3  -3 -10  339.77   13.60
   3   3  10  321.47   10.80
   9  -4 -10   58.89    5.00
   9  -4 -10   56.09    4.10
   8  -4 -10   71.09    4.20
   8  -4 -10   57.19    4.70
   7  -4 -10   12.90    1.90
   7  -4 -10   18.20    3.00
   6  -4 -10   88.99    4.20
   6  -4 -10   77.49    4.10
   6  -4 -10   87.19    5.50
   5  -4 -10  192.28    9.10
   5  -4 -10  204.78    7.40
   5  -4 -10  196.28    8.10
   4  -4 -10   33.90    3.30
   4  -4 -10   33.10    2.90
   4  -4 -10   34.50    2.20
   3  -4 -10  178.98    7.80
   3  -4 -10  168.48    5.90
   3  -4 -10  175.58    8.10
   3  -4 -10  143.89    5.80
   2  -4 -10  608.24   21.20
   2  -4 -10  621.04   21.60
   1  -4 -10  240.18   10.50
   1  -4 -10  243.98   10.40
   0  -4 -10   31.40    3.20
   0  -4 -10   34.30    3.30
  -1  -4 -10  228.78   10.40
  -1  -4 -10  232.38   10.60
   1   4  10  239.18    8.60
  -2  -4 -10  168.38    8.90
  -2  -4 -10  179.18    8.90
   2   4  10  183.38    6.60
  -3  -4 -10   59.99    5.20
  -4  -4 -10   77.69    5.70
  -4  -4 -10   82.69    5.90
   8  -5 -10   14.10    2.40
   7  -5 -10   61.89    4.90
   7  -5 -10   59.79    3.90
   7  -5 -10   61.19    3.30
   6  -5 -10   71.09    5.10
   6  -5 -10   65.89    3.80
   6  -5 -10   63.39    3.80
   5  -5 -10   20.80    2.30
   5  -5 -10   25.30    2.70
   5  -5 -10   26.30    3.20
   4  -5 -10   26.80    2.80
   4  -5 -10   26.20    2.20
   4  -5 -10   36.10    3.50
   3  -5 -10   54.59    3.00
   3  -5 -10   51.99    4.20
   3  -5 -10   53.19    4.10
   2  -5 -10  185.98    6.70
   2  -5 -10  194.28    9.00
   2  -5 -10  181.38    8.90
   1  -5 -10   36.50    3.50
   1  -5 -10   37.00    3.60
   0  -5 -10   95.69    6.10
   0  -5 -10  107.29    6.30
  -1  -5 -10  166.98    8.70
  -1  -5 -10  162.38    8.40
   1   5  10  161.78    6.30
  -2  -5 -10   45.20    4.50
  -2  -5 -10   36.40    5.50
  -3  -5 -10    9.20    2.40
  -3  -5 -10   12.20    2.80
   7  -6 -10   20.10    3.40
   7  -6 -10   23.60    2.90
   7  -6 -10   23.70    2.40
   6  -6 -10    1.10    1.30
   6  -6 -10   -0.70    1.00
   6  -6 -10   -0.70    1.20
   5  -6 -10   -0.40    1.20
   5  -6 -10   -0.30    1.40
   5  -6 -10    0.70    1.20
   4  -6 -10   21.10    2.40
   4  -6 -10   20.10    3.00
   4  -6 -10   19.70    3.40
   3  -6 -10   34.10    3.50
   3  -6 -10   41.70    3.90
   3  -6 -10   37.20    2.70
   2  -6 -10    1.50    1.30
   2  -6 -10    4.80    1.50
   2  -6 -10    3.20    1.20
   1  -6 -10   72.09    5.10
   1  -6 -10   67.49    5.00
   0  -6 -10   54.49    4.50
   0  -6 -10   55.49    4.60
  -2  -6 -10    4.20    1.50
  -2  -6 -10   -0.90    1.10
   6  -7 -10   30.30    3.10
   6  -7 -10   31.90    3.20
   5  -7 -10   18.20    2.70
   5  -7 -10   20.60    3.30
   5  -7 -10   18.50    2.50
   4  -7 -10    3.60    1.70
   4  -7 -10    1.00    1.40
   4  -7 -10    6.30    2.00
   3  -7 -10   22.20    3.40
   3  -7 -10   15.40    2.00
   3  -7 -10   18.00    3.20
   2  -7 -10   57.69    3.50
   2  -7 -10   70.19    5.10
   2  -7 -10   56.19    4.80
   1  -7 -10    3.00    1.90
   0  -7 -10    4.70    1.90
   0  -7 -10    2.60    1.50
   0   7  10   -1.40    1.20
  -3 -14  11   14.90    3.00
  -2 -14  11   19.00    3.30
  -2 -14  11   25.00    2.90
  -1 -14  11   98.89    5.60
  -1 -14  11   84.89    6.30
   0 -14  11   51.59    5.90
   0 -14  11   57.19    4.30
   1 -14  11   12.00    2.50
   2 -14  11   89.19    5.70
   3 -14  11   50.59    4.60
   3 -14  11   50.99    4.30
  -4 -13  11  110.79    7.60
  -4 -13  11  102.29    5.60
  -3 -13  11   28.70    3.50
  -3 -13  11   25.20    2.80
  -2 -13  11  162.58    8.90
  -2 -13  11  182.38    8.10
  -1 -13  11  201.38    9.00
   0 -13  11   15.40    2.50
   1 -13  11   34.00    3.30
   2 -13  11  249.97   10.50
   2 -13  11  241.18   10.70
   3 -13  11   83.29    6.10
   3 -13  11   80.09    5.60
   4 -13  11   13.30    2.70
   4 -13  11   19.90    3.30
  -5 -12  11  140.69    8.10
  -5 -12  11  153.58    7.00
  -4 -12  11   26.40    2.80
  -4 -12  11   22.60    3.50
  -3 -12  11   83.99    5.00
  -3 -12  11   87.09    5.90
  -2 -12  11  254.97   10.40
  -1 -12  11   69.29    4.40
   0 -12  11   73.69    4.80
   1 -12  11  286.27   11.70
   2 -12  11  226.98   10.00
   2 -12  11  226.58    9.60
   3 -12  11   15.10    2.60
   3 -12  11   19.10    3.00
   4 -12  11  100.99    6.30
   5 -12  11  124.09    7.30
   5 -12  11  134.59    7.40
  -6 -11  11  171.78    7.60
  -6 -11  11  175.68    9.10
  -5 -11  11    3.50    2.00
  -5 -11  11    8.00    1.80
  -4 -11  11   47.40    3.50
  -4 -11  11   44.90    4.10
  -3 -11  11  142.49    6.80
  -2 -11  11   89.69    5.10
  -1 -11  11   37.70    3.20
   0 -11  11  128.19    6.50
   1 -11  11  170.88    8.10
   2 -11  11   23.20    2.60
   2 -11  11   19.50    2.60
   3 -11  11   76.39    5.10
   3 -11  11   83.19    5.10
   4 -11  11  165.08    8.10
   4 -11  11  173.38    8.50
   5 -11  11   95.79    6.40
   5 -11  11   93.99    6.00
  -7 -10  11   32.60    3.80
  -7 -10  11   25.40    2.80
  -6 -10  11   17.00    2.40
  -6 -10  11   13.70    2.60
  -5 -10  11    4.90    1.60
  -5 -10  11    2.80    1.60
  -4 -10  11   85.59    4.90
  -3 -10  11  122.69    6.10
  -2 -10  11    2.20    1.00
  -1 -10  11   44.40    3.40
   0 -10  11  186.28    8.20
   1 -10  11   56.59    3.90
   2 -10  11   45.40    3.60
   2 -10  11   55.89    4.10
   3 -10  11   97.59    5.50
   3 -10  11   94.69    5.60
   4 -10  11   46.30    3.80
   4 -10  11   48.90    4.00
   5 -10  11    1.90    1.30
   5 -10  11    2.90    1.60
   6 -10  11   23.90    3.40
   6 -10  11   20.80    3.30
  -8  -9  11    3.70    1.60
  -7  -9  11   37.60    3.80
  -7  -9  11   39.60    3.30
  -6  -9  11   40.40    3.70
  -6  -9  11   38.50    3.10
  -5  -9  11   17.90    2.60
  -4  -9  11   30.30    2.80
   3   9 -11  168.38    6.70
  -3  -9  11  165.08    7.50
   2   9 -11  139.89    5.40
  -2  -9  11  126.69    6.30
   1   9 -11   16.60    1.40
  -1  -9  11   12.20    2.00
  -1  -9  11   12.80    1.30
   0  -9  11  120.69    6.10
   1  -9  11  173.68    7.10
   1  -9  11  174.98    7.90
   2  -9  11   53.69    3.50
   2  -9  11   46.60    3.60
   3  -9  11   31.90    3.10
   3  -9  11   35.40    3.00
   4  -9  11   40.10    3.50
   4  -9  11   45.20    3.50
  -5   9 -11   40.10    2.60
   5  -9  11   33.00    3.30
   5  -9  11   40.40    3.70
   6  -9  11   18.60    3.00
   8   8 -11   43.40    3.50
  -8  -8  11   48.70    4.10
   7   8 -11  205.08    8.30
  -7  -8  11  195.38    8.90
  -6  -8  11  107.59    6.00
   5   8 -11   67.69    4.20
  -5  -8  11   71.49    4.30
   4   8 -11  269.47   10.00
  -4  -8  11  257.37   10.30
   3   8 -11  407.46   13.60
  -3  -8  11  383.96   14.20
   2   8 -11   12.80    1.60
  -2  -8  11   13.20    2.20
   1   8 -11  203.08    7.50
  -1  -8  11  218.08    8.80
   0   8 -11  651.93   20.20
   0  -8  11  668.23   22.00
  -1   8 -11   97.19    4.00
   1  -8  11  100.59    5.40
   1  -8  11   98.09    4.60
  -2   8 -11    2.60    0.80
   2  -8  11    2.30    1.20
   2  -8  11    2.60    1.10
  -3   8 -11  253.47    8.90
   3  -8  11  263.97   10.80
   3  -8  11  263.27   10.10
  -4   8 -11  274.67    9.60
   4  -8  11  265.67   11.10
  -5   8 -11    1.60    1.00
   5  -8  11    2.90    1.40
   5  -8  11    3.20    1.40
  -6   8 -11   14.60    2.20
   6  -8  11   19.00    2.90
   6  -8  11   15.00    2.40
   8   7 -11  160.28    7.30
  -8  -7  11  170.68    7.80
   7   7 -11  186.08    7.60
  -7  -7  11  183.58    8.30
   6   7 -11    5.00    1.50
   6   7 -11    7.80    1.50
   5   7 -11   90.79    4.90
   4   7 -11  454.15   15.60
   3   7 -11  186.38    7.60
  -3  -7  11  200.68    8.60
   2   7 -11  217.68    8.10
   1   7 -11  559.34   17.60
  -1  -7  11  539.95   20.70
   0   7 -11  296.87    9.90
   0  -7  11  282.37   10.90
   0  -7  11  275.97    9.70
  -1   7 -11   36.70    2.40
   1  -7  11   47.70    2.80
   1  -7  11   54.09    3.60
  -2   7 -11  324.87   11.00
   2  -7  11  332.37   12.50
   2  -7  11  316.07   11.40
  -3   7 -11  521.35   16.90
   3  -7  11  527.95   18.40
   3  -7  11  518.35   17.50
  -4   7 -11  103.19    4.80
   4  -7  11   95.09    5.10
   4  -7  11   99.99    5.60
  -5   7 -11   63.49    3.90
   5  -7  11   70.39    4.60
   5  -7  11   69.19    4.70
  -6   7 -11  212.98    8.60
   6  -7  11  201.78    9.30
   6  -7  11  207.58    9.10
   9   6 -11  145.89    6.90
  -9  -6  11  141.29    6.60
   8   6 -11  205.38    8.50
  -8  -6  11  213.28    8.70
   7   6 -11   39.80    3.50
   7   6 -11   41.90    2.90
  -7  -6  11   47.20    3.40
   6   6 -11   63.29    3.40
   6   6 -11   61.59    4.20
   5   6 -11  194.48    8.30
   4   6 -11  106.49    5.30
   3   6 -11  107.89    5.10
   2   6 -11  419.96   13.80
  -2  -6  11  386.86   14.30
   1   6 -11  947.91   29.30
  -1  -6  11  934.41   28.20
  -1  -6  11  976.60   30.30
   0   6 -11   18.10    1.70
   0  -6  11   13.50    2.60
   0  -6  11   15.10    1.40
   0  -6  11   13.90    1.40
  -1   6 -11  232.28    8.40
   1  -6  11  232.58    9.20
   1  -6  11  214.68    7.90
  -2   6 -11  685.83   21.70
   2  -6  11  695.23   22.80
   2  -6  11  674.73   21.50
  -3   6 -11  199.48    7.70
   3  -6  11  185.98    7.50
   3  -6  11  193.48    8.40
  -4   6 -11   30.80    2.60
   4  -6  11   32.90    2.70
   4  -6  11   32.70    3.00
  -5   6 -11  217.68    9.70
   5  -6  11  213.68    9.30
   5  -6  11  209.38    8.80
  -6   6 -11  174.68    7.80
   6  -6  11  168.48    8.00
   6  -6  11  165.88    7.80
   9   5 -11   42.70    3.40
  -9  -5  11   48.30    3.30
   8   5 -11    7.30    1.60
   8   5 -11    7.50    2.10
  -8  -5  11    8.40    1.60
   7   5 -11  101.09    4.80
   7   5 -11  102.29    5.90
   6   5 -11  103.09    5.60
   6   5 -11   96.99    4.40
   5   5 -11  192.18    6.90
   5   5 -11  189.08    8.20
   4   5 -11   93.39    4.90
   3   5 -11  204.98    8.30
  -3  -5  11  210.78    7.00
   2   5 -11  186.38    7.50
   1   5 -11   57.59    3.30
  -1  -5  11   61.59    3.70
   0   5 -11   71.39    3.70
   0  -5  11   59.19    3.80
  -1   5 -11  375.86   12.40
   1  -5  11  343.17   11.40
   1  -5  11  347.17   13.40
  -2   5 -11  177.28    7.00
   2  -5  11  170.78    7.50
   2  -5  11  164.78    6.40
  -3   5 -11   27.20    2.30
   3  -5  11   26.10    2.50
   3  -5  11   25.30    2.10
  -4   5 -11  199.98    8.30
   4  -5  11  206.58    8.00
   4  -5  11  197.68    8.70
  -5   5 -11   78.89    4.70
   5  -5  11   81.69    4.90
  -6   5 -11   39.30    3.40
   6  -5  11   30.20    3.00
   6  -5  11   34.30    3.30
   9   4 -11   25.30    2.70
   9   4 -11   17.60    3.10
   8   4 -11   24.60    2.40
   8   4 -11   21.90    3.30
  -8  -4  11   27.10    2.30
   7   4 -11   52.89    4.10
   7   4 -11   49.00    3.00
   6   4 -11   48.30    3.70
   6   4 -11   49.80    2.80
   5   4 -11   66.89    4.40
   5   4 -11   74.49    3.20
   4   4 -11   62.99    3.80
  -4  -4  11   51.49    2.60
   3   4 -11  215.48    8.60
   2   4 -11  160.68    6.90
   1   4 -11   42.20    2.80
  -1  -4  11   42.90    3.10
   0   4 -11  157.78    6.60
   0  -4  11  152.38    6.80
  -1   4 -11   12.30    1.50
   1  -4  11    7.40    0.80
   1  -4  11    7.00    1.50
  -2   4 -11   15.10    1.80
  -3   4 -11   83.49    4.40
  -3   4 -11   84.29    4.70
   3  -4  11   71.39    3.70
   3  -4  11   73.59    4.40
  -4   4 -11   53.09    3.70
   4  -4  11   52.59    3.60
   4  -4  11   52.29    3.20
  -5   4 -11   10.70    2.10
   5  -4  11   12.10    2.30
   5  -4  11   13.60    2.10
  -6   4 -11    5.80    1.90
   6  -4  11    8.10    1.70
   6  -4  11    8.30    2.00
   9   3 -11   71.49    5.30
   9   3 -11   76.39    4.50
   8   3 -11   41.80    3.90
   8   3 -11   41.20    2.90
  -8  -3  11   35.80    2.50
   7   3 -11   27.60    2.90
   7   3 -11   22.90    2.00
   6   3 -11  265.87    9.00
   6   3 -11  251.37   10.60
   5   3 -11  209.58    7.30
   4   3 -11   15.90    2.10
   3   3 -11  181.58    7.70
   2   3 -11  262.17   10.10
   1   3 -11   27.00    2.40
   0   3 -11  171.28    7.10
   0   3 -11  157.48    7.30
   0  -3  11  169.78    7.20
  -1   3 -11  106.69    5.30
  -1   3 -11  104.09    5.10
   1  -3  11   91.29    5.00
  -2   3 -11   56.19    3.70
  -2   3 -11   56.79    3.80
   2  -3  11   57.89    3.60
   2  -3  11   61.99    2.70
  -3   3 -11    6.90    1.60
  -3   3 -11    7.00    2.60
   3  -3  11    5.50    1.50
   3  -3  11    7.80    1.20
  -4   3 -11   51.99    3.80
  -4   3 -11   53.19    3.80
   4  -3  11   54.89    3.70
   4  -3  11   53.49    3.20
  -5   3 -11   47.40    3.80
  -5   3 -11   44.40    3.50
   5  -3  11   46.50    3.50
   5  -3  11   47.60    3.30
  -6   3 -11   19.10    3.10
  -6   3 -11   21.80    2.60
   6  -3  11   22.70    2.90
   6  -3  11   21.30    2.40
   9   2 -11   50.59    4.70
   9   2 -11   59.39    3.70
   8   2 -11   23.40    2.20
   8   2 -11   24.20    3.60
   7   2 -11  279.37   11.60
   7   2 -11  271.67    9.70
   6   2 -11  154.18    7.50
   6   2 -11  162.28    5.90
   5   2 -11   22.60    1.30
   5   2 -11   19.80    2.30
  -5  -2  11   20.00    1.70
   4   2 -11  355.06   13.20
   3   2 -11  425.96   15.20
   2   2 -11  177.48    7.30
   2   2 -11  174.78    7.50
   1   2 -11   72.39    4.20
   1   2 -11   74.89    4.20
   0   2 -11  258.07   10.20
   0   2 -11  254.67   11.00
   0  -2  11  287.97   10.30
  -1   2 -11  641.54   21.50
  -1   2 -11  645.94   21.40
   1  -2  11  640.24   21.10
  -2   2 -11  147.89    7.00
   2  -2  11  144.79    5.10
   2  -2  11  145.89    6.50
  -3   2 -11   89.39    5.10
  -3   2 -11   82.89    5.00
   3  -2  11   84.49    4.60
   3  -2  11   86.19    3.80
  -4   2 -11  203.58    9.20
  -4   2 -11  211.78    9.30
   4  -2  11  206.18    8.60
   4  -2  11  220.68    8.00
  -5   2 -11   98.29    5.70
  -5   2 -11   94.49    5.40
   5  -2  11   84.99    4.80
   5  -2  11   86.69    5.60
  -6   2 -11   21.00    3.30
  -6   2 -11   24.60    2.90
   6  -2  11   29.20    2.80
   6  -2  11   24.40    2.60
   9   1 -11   15.70    2.20
   9   1 -11   17.10    3.20
   8   1 -11  113.49    5.20
   8   1 -11  110.89    6.50
   7   1 -11  116.29    6.60
   7   1 -11  117.89    5.00
   6   1 -11   25.10    2.80
   6   1 -11   22.20    1.70
   5   1 -11  259.87    8.20
   5   1 -11  254.17   10.60
   3   1 -11  435.36   14.60
   3   1 -11  415.06   15.20
   2   1 -11   79.59    4.50
   2   1 -11   71.99    4.10
   1   1 -11  366.36   14.20
   1   1 -11  382.66   13.70
   0   1 -11  273.97   10.80
   0   1 -11  273.37   10.80
   0  -1  11  288.27   10.50
  -1   1 -11  382.46   14.20
  -1   1 -11  389.26   15.30
   1  -1  11  399.26   13.80
  -2   1 -11  184.48    8.30
  -2   1 -11  191.38    8.40
   2  -1  11  189.08    7.80
   2  -1  11  193.88    6.40
  -3   1 -11  434.06   16.00
  -3   1 -11  451.65   16.20
   3  -1  11  425.76   14.00
   3  -1  11  443.26   15.10
  -4   1 -11  255.47   10.80
  -4   1 -11  257.57   10.90
   4  -1  11  262.17    9.90
   4  -1  11  254.27    9.30
  -5   1 -11   31.10    3.10
  -5   1 -11   34.00    3.50
   5  -1  11   29.80    2.70
   5  -1  11   36.00    2.80
   9   0 -11   40.30    3.20
   9   0 -11   46.30    7.50
   8   0 -11   78.79    4.10
   8   0 -11   72.19    5.20
   7   0 -11   61.79    3.30
   7   0 -11   63.59    4.60
   6   0 -11   33.30    3.20
   6   0 -11   32.30    2.10
   5   0 -11  136.49    6.90
   4   0 -11  212.78    8.20
   4   0 -11  214.18    9.30
   3   0 -11   25.40    3.00
   3   0 -11   25.40    2.30
   2   0 -11  446.76   15.60
   1   0 -11  329.17   12.20
   1   0 -11  315.77   14.00
   0   0 -11  181.08    8.20
   0   0 -11  188.38    8.30
   0   0  11  190.58    7.70
  -1   0 -11  122.49    6.10
  -1   0 -11  113.19    6.00
   1   0  11  104.09    5.20
  -2   0 -11  224.58    9.80
  -2   0 -11  235.38   10.00
   2   0  11  234.68    9.00
  -3   0 -11  234.88   10.20
  -3   0 -11  234.08   10.30
   3   0  11  234.38    9.00
   3   0  11  243.28    8.30
  -4   0 -11   17.80    2.90
  -4   0 -11   15.80    2.70
   4   0  11   18.90    2.10
   4   0  11   20.20    1.90
  -5   0 -11   89.29    5.90
  -5   0 -11   86.59    5.70
   5   0  11   88.19    4.50
   5   0  11   98.99    4.70
   9  -1 -11   39.40    3.10
   9  -1 -11   36.80    4.20
   8  -1 -11   20.00    3.10
   8  -1 -11   26.10    2.30
   7  -1 -11    0.50    0.80
   7  -1 -11    0.20    1.00
   6  -1 -11   66.89    4.70
   6  -1 -11   73.69    3.30
   5  -1 -11  144.79    6.10
   5  -1 -11  147.09    7.40
   4  -1 -11   34.90    2.70
   4  -1 -11   35.20    3.20
   3  -1 -11   80.49    4.90
   3  -1 -11   79.69    4.40
   2  -1 -11  194.68    8.70
   2  -1 -11  194.38    8.30
   1  -1 -11   73.29    4.60
   1  -1 -11   75.29    4.60
   0  -1 -11   11.10    2.10
   0  -1 -11    9.40    1.90
  -1  -1 -11  183.88    8.60
  -1  -1 -11  189.18    8.60
   1   1  11  184.08    7.60
  -2  -1 -11  122.89    6.70
  -2  -1 -11  122.69    6.70
   2   1  11  123.89    5.60
  -3  -1 -11   19.80    3.20
  -3  -1 -11   21.10    3.10
   3   1  11   19.30    2.00
   3   1  11   16.40    1.60
  -4  -1 -11   57.49    4.60
  -4  -1 -11   69.99    5.00
   4   1  11   68.39    3.60
   4   1  11   64.99    3.60
  -5  -1 -11  113.59    6.70
  -5  -1 -11  115.79    7.10
   5   1  11  105.89    5.20
   9  -2 -11   14.60    2.40
   9  -2 -11   14.70    2.80
   8  -2 -11   53.49    4.60
   8  -2 -11   52.59    3.40
   7  -2 -11   42.10    2.80
   7  -2 -11   48.90    4.10
   6  -2 -11   15.20    2.70
   6  -2 -11   13.70    1.60
   5  -2 -11   55.09    3.40
   5  -2 -11   55.49    4.20
   4  -2 -11   84.19    4.50
   4  -2 -11   81.59    5.20
   3  -2 -11   30.20    2.70
   3  -2 -11   28.90    2.90
   2  -2 -11   52.19    4.00
   2  -2 -11   50.99    3.70
   1  -2 -11  172.58    8.10
   1  -2 -11  182.28    8.30
   0  -2 -11   88.09    5.30
   0  -2 -11   85.09    5.30
  -1  -2 -11   50.69    4.10
  -1  -2 -11   48.80    3.90
   1   2  11   53.29    3.30
  -2  -2 -11   38.30    3.70
  -2  -2 -11   36.40    3.50
   2   2  11   37.00    2.60
  -3  -2 -11    7.60    2.10
  -3  -2 -11    5.90    1.90
   3   2  11    6.80    1.40
  -4  -2 -11    9.40    2.40
  -4  -2 -11    7.00    2.20
   8  -3 -11   66.39    5.60
   8  -3 -11   69.09    4.50
   7  -3 -11   -0.50    1.00
   7  -3 -11    1.70    1.10
   6  -3 -11   78.39    3.70
   6  -3 -11   79.39    5.40
   6  -3 -11   81.49    4.10
   5  -3 -11  178.68    8.70
   5  -3 -11  177.28    8.10
   4  -3 -11   47.60    3.50
   4  -3 -11   50.49    4.10
   3  -3 -11   49.30    3.70
   3  -3 -11   48.30    3.90
   2  -3 -11  476.95   17.20
   2  -3 -11  479.55   17.70
   1  -3 -11  134.39    7.00
   1  -3 -11  133.49    7.00
   0  -3 -11   28.60    3.00
   0  -3 -11   27.00    2.90
  -1  -3 -11   67.49    4.80
  -1  -3 -11   69.09    5.00
   1   3  11   74.19    3.90
  -2  -3 -11   77.89    5.40
  -2  -3 -11   81.89    5.50
   2   3  11   73.69    3.90
  -3  -3 -11    9.30    2.30
   8  -4 -11   22.20    2.60
   8  -4 -11   21.40    3.40
   7  -4 -11   72.49    3.90
   7  -4 -11   66.49    5.20
   6  -4 -11  155.08    7.30
   6  -4 -11  156.98    6.30
   6  -4 -11  158.08    8.20
   5  -4 -11   89.89    4.00
   5  -4 -11   91.19    5.80
   5  -4 -11   95.59    5.00
   4  -4 -11   13.40    2.60
   4  -4 -11   13.60    2.30
   3  -4 -11   87.89    5.80
   3  -4 -11  104.59    5.70
   2  -4 -11  285.67   12.10
   2  -4 -11  282.77   11.70
   1  -4 -11   51.39    4.30
   1  -4 -11   48.80    4.00
   0  -4 -11   97.99    6.10
   0  -4 -11  109.99    6.40
  -1  -4 -11  294.07   12.60
  -1  -4 -11  287.17   12.40
   1   4  11  289.47   10.40
   7  -5 -11  122.79    5.50
   7  -5 -11  129.29    5.90
   7  -5 -11  134.89    9.60
   6  -5 -11   76.69    5.60
   6  -5 -11   81.19    4.20
   6  -5 -11   85.59    4.50
   5  -5 -11   30.10    2.50
   5  -5 -11   37.10    3.30
   5  -5 -11   29.90    3.60
   4  -5 -11  165.38    8.60
   4  -5 -11  171.48    7.90
   3  -5 -11   66.49    4.70
   3  -5 -11   71.89    5.20
   2  -5 -11   75.39    5.30
   2  -5 -11   62.39    4.70
   1  -5 -11   61.09    4.70
   1  -5 -11   61.19    4.80
   0  -5 -11  137.29    7.70
   0  -5 -11  145.29    7.90
   0   5  11  145.99    6.30
  -1  -5 -11  158.68    9.10
  -1  -5 -11  149.19    8.40
   6  -6 -11   -0.90    1.40
   6  -6 -11    1.40    1.40
   6  -6 -11   -0.40    1.30
   5  -6 -11   52.79    4.90
   5  -6 -11   55.79    4.00
   4  -6 -11  215.88    9.60
   4  -6 -11  216.28   10.40
   3  -6 -11   32.20    3.60
   3  -6 -11   33.50    3.40
   2  -6 -11   31.90    3.50
   2  -6 -11   27.80    3.50
   0  -6 -11   46.10    4.40
   0  -6 -11   45.10    4.30
   0   6  11   55.49    3.40
   3  -7 -11   -3.60    1.50
   3  -7 -11    8.70    2.50
  -2 -14  12   19.90    3.00
  -2 -14  12   19.10    3.50
  -1 -14  12   12.10    2.60
  -1 -14  12   10.80    2.20
   0 -14  12   37.30    3.40
   2 -14  12   19.70    3.20
   2 -14  12   20.70    3.30
  -4 -13  12   45.10    4.60
  -4 -13  12   48.80    3.90
  -3 -13  12  108.09    6.00
  -2 -13  12  112.79    6.30
  -1 -13  12   38.30    3.50
   0 -13  12   10.50    2.30
   1 -13  12   78.69    5.30
   2 -13  12   69.29    5.00
   2 -13  12   69.89    5.10
   3 -13  12    2.50    1.50
   3 -13  12    3.40    1.70
  -5 -12  12   11.30    2.20
  -5 -12  12   13.60    3.10
  -4 -12  12   72.39    4.50
  -4 -12  12   61.09    5.10
  -3 -12  12  197.88    8.80
  -2 -12  12  105.79    5.90
  -1 -12  12   47.20    3.80
   0 -12  12  210.68    9.50
   1 -12  12  198.58    9.20
   2 -12  12   29.60    3.30
   2 -12  12   33.40    3.30
   3 -12  12   30.90    3.40
   3 -12  12   36.20    3.60
   4 -12  12  138.79    7.50
   4 -12  12  137.49    7.40
  -6 -11  12   57.09    4.80
  -6 -11  12   62.39    4.20
  -5 -11  12   21.20    3.40
  -5 -11  12   26.50    2.80
  -4 -11  12  259.97   10.60
  -3 -11  12  176.18    8.00
  -2 -11  12   30.50    3.00
  -1 -11  12  118.49    6.40
   0 -11  12  353.36   13.70
   1 -11  12   60.39    4.40
   1 -11  12   58.59    3.90
   2 -11  12   71.79    4.60
   2 -11  12   69.59    4.80
   3 -11  12  183.08    8.40
   3 -11  12  181.38    8.80
   4 -11  12  140.99    9.30
   4 -11  12  135.49    7.20
   5 -11  12   41.70    3.90
   5 -11  12   43.70    4.10
  -7 -10  12   41.30    3.50
  -7 -10  12   49.70    4.40
  -6 -10  12    9.80    2.30
  -6 -10  12    6.90    1.70
  -5 -10  12  102.69    5.70
  -4 -10  12   98.79    5.60
  -3 -10  12   43.90    3.50
  -2 -10  12   63.59    4.20
  -1 -10  12  283.47   11.40
   0 -10  12   87.29    5.20
   1 -10  12   16.30    2.30
   1 -10  12   17.20    2.60
   2 -10  12  159.98    7.90
   2 -10  12  158.28    7.60
   3 -10  12  129.39    7.80
   3 -10  12  119.29    6.60
   4 -10  12   31.90    3.30
   4 -10  12   33.10    3.20
   5 -10  12   90.49    5.50
   5 -10  12   81.39    5.60
  -7  -9  12   17.70    2.70
  -7  -9  12   17.50    3.00
  -6  -9  12   30.40    3.30
  -6  -9  12   31.20    2.90
  -5  -9  12   32.10    3.10
   4   9 -12   51.99    3.40
  -4  -9  12   57.79    4.00
   3   9 -12   41.50    2.80
  -3  -9  12   40.60    3.30
   2   9 -12   63.69    3.30
  -2  -9  12   68.29    4.30
   1   9 -12   46.10    2.50
  -1  -9  12   45.80    3.50
   0   9 -12   10.10    1.20
   0  -9  12    8.40    2.00
   1  -9  12  104.09    5.00
   1  -9  12  102.29    5.80
   2  -9  12   79.69    5.00
   2  -9  12   79.59    4.40
   3  -9  12   53.09    4.10
   3  -9  12   52.09    3.60
  -4   9 -12   21.60    2.00
   4  -9  12   23.00    3.20
   4  -9  12   24.60    3.10
   5  -9  12  107.39    6.00
   5  -9  12  107.69    6.40
   8   8 -12   55.69    4.00
  -8  -8  12   60.69    4.60
  -7  -8  12   36.30    3.40
   6   8 -12    4.50    1.50
  -5  -8  12  169.98    7.80
   4   8 -12  136.99    6.30
  -4  -8  12  137.99    6.70
   3   8 -12   29.00    2.40
  -3  -8  12   28.20    2.70
   2   8 -12   28.50    2.30
  -2  -8  12   29.40    2.80
   1   8 -12  158.98    6.40
  -1  -8  12  175.48    7.70
   0   8 -12   77.19    3.50
   0  -8  12   75.29    4.50
   0  -8  12   66.39    3.60
  -1   8 -12   15.90    1.60
   1  -8  12   19.50    2.30
   1  -8  12   18.00    2.20
  -2   8 -12   23.70    1.90
   2  -8  12   20.60    2.20
   2  -8  12   24.20    2.70
  -3   8 -12  105.89    4.70
   3  -8  12  107.69    6.00
   3  -8  12  108.19    5.30
  -4   8 -12    3.50    1.10
   4  -8  12    7.50    1.80
   4  -8  12    3.50    1.70
  -5   8 -12    7.60    1.70
   5  -8  12    5.40    1.70
   5  -8  12    8.60    1.80
  -6   8 -12   43.10    3.40
   6  -8  12   35.60    3.60
   6  -8  12   37.70    3.50
   8   7 -12   78.39    4.50
  -8  -7  12   74.99    4.70
   7   7 -12   10.90    2.40
   7   7 -12   12.70    1.90
  -7  -7  12    7.80    1.90
   6   7 -12   93.89    5.50
   4   7 -12  191.08    8.00
   3   7 -12   31.30    2.50
  -3  -7  12   34.20    2.90
   2   7 -12  440.96   14.70
  -2  -7  12  428.96   15.60
   1   7 -12  489.75   15.80
  -1  -7  12  466.35   16.90
   0   7 -12    4.10    1.10
   0  -7  12    2.70    1.00
   0  -7  12    2.80    1.00
  -1   7 -12  160.48    6.30
   1  -7  12  147.89    6.10
   1  -7  12  157.78    7.40
  -2   7 -12  434.16   14.40
   2  -7  12  424.86   15.70
   2  -7  12  426.76   14.40
  -3   7 -12   81.09    4.10
   3  -7  12   73.79    4.80
   3  -7  12   78.69    4.30
  -4   7 -12   54.09    3.50
   4  -7  12   54.59    3.60
   4  -7  12   60.29    4.20
   5  -7  12  119.49    6.60
   5  -7  12  125.09    6.20
  -6   7 -12  125.99    6.40
   6  -7  12  127.89    6.90
   6  -7  12  133.69    6.60
   8   6 -12   75.49    4.30
   8   6 -12   66.89    5.10
  -8  -6  12   72.49    4.90
   7   6 -12   66.19    3.80
   7   6 -12   62.29    4.60
   6   6 -12  165.78    7.90
   5   6 -12  216.18    9.40
   4   6 -12   86.99    4.80
   3   6 -12  316.27   11.60
   2   6 -12  795.62   25.40
  -2  -6  12  794.52   23.90
  -2  -6  12  815.62   26.20
   1   6 -12   48.80    3.20
  -1  -6  12   56.09    2.50
  -1  -6  12   57.79    3.80
  -1  -6  12   52.59    2.30
   0   6 -12   83.79    4.20
   0  -6  12   84.29    3.50
   0  -6  12   91.29    5.00
   0  -6  12   80.79    3.20
  -1   6 -12  474.05   15.90
   1  -6  12  472.85   16.70
  -2   6 -12  409.86   14.00
   2  -6  12  413.26   15.00
   2  -6  12  399.46   13.40
  -3   6 -12   55.69    3.60
   3  -6  12   54.19    3.20
   3  -6  12   58.09    4.00
  -4   6 -12  137.79    6.40
   4  -6  12  133.19    6.00
   4  -6  12  123.59    6.70
  -5   6 -12  300.77   11.40
   5  -6  12  288.97   11.20
   5  -6  12  291.37   11.90
  -6   6 -12   31.00    3.20
   6  -6  12   34.10    3.20
   6  -6  12   31.90    3.30
   9   5 -12   33.60    3.90
   9   5 -12   35.90    3.10
  -9  -5  12   36.30    3.00
   8   5 -12   26.00    2.50
   8   5 -12   24.80    3.60
  -8  -5  12   29.80    2.70
   7   5 -12   73.99    5.00
   7   5 -12   73.99    3.80
   6   5 -12  165.98    7.80
   6   5 -12  161.38    6.20
   5   5 -12   23.80    2.50
   4   5 -12  254.97   10.10
   3   5 -12  358.86   13.00
   2   5 -12   85.69    4.60
  -2  -5  12   92.19    5.00
   1   5 -12  105.79    5.20
  -1  -5  12  111.29    5.60
   0   5 -12  433.16   15.00
   0  -5  12  438.36   15.60
  -1   5 -12  335.57   12.00
   1  -5  12  326.97   12.40
  -2   5 -12   25.60    2.40
   2  -5  12   27.90    1.90
   2  -5  12   27.80    2.70
  -3   5 -12  182.88    7.70
   3  -5  12  176.38    6.90
   3  -5  12  176.88    8.10
  -4   5 -12  303.67   11.60
   4  -5  12  301.47   12.00
   4  -5  12  305.77   10.90
  -5   5 -12   63.29    4.40
   5  -5  12   61.19    4.30
   5  -5  12   61.59    3.90
  -6   5 -12   30.80    3.30
   6  -5  12   28.20    3.50
   6  -5  12   21.50    2.80
   9   4 -12   24.30    2.70
   9   4 -12   29.30    3.80
   8   4 -12   50.89    4.40
   8   4 -12   46.90    3.10
   7   4 -12   58.39    4.40
   7   4 -12   60.39    3.30
   6   4 -12   34.80    3.10
   6   4 -12   32.70    2.10
   5   4 -12   10.40    1.90
   4   4 -12   84.09    4.80
   3   4 -12  163.38    7.20
   2   4 -12    3.40    1.20
   1   4 -12  226.68    8.90
  -1  -4  12  221.98    9.20
   0   4 -12  421.96   14.70
   0  -4  12  413.26   15.00
  -1   4 -12    8.60    1.60
   1  -4  12   12.50    2.10
  -2   4 -12   91.49    4.80
   2  -4  12   85.99    3.50
   2  -4  12   81.89    4.80
  -3   4 -12  149.99    7.00
   3  -4  12  142.89    7.00
   3  -4  12  155.68    5.90
  -4   4 -12   73.69    4.70
   4  -4  12   73.19    4.60
   4  -4  12   74.69    3.90
  -5   4 -12   13.10    2.50
   5  -4  12   17.70    2.80
   5  -4  12   14.90    2.50
  -6   4 -12   94.19    5.90
   6  -4  12   93.59    5.10
   6  -4  12   89.59    5.30
   9   3 -12    6.30    2.40
   9   3 -12   11.30    2.00
   8   3 -12    5.40    1.70
   8   3 -12    5.70    1.40
   7   3 -12   62.99    4.60
   7   3 -12   59.99    3.10
   6   3 -12   21.00    1.60
   6   3 -12   24.80    2.80
   5   3 -12  105.29    5.70
  -5  -3  12   98.89    4.00
   3   3 -12   74.29    4.50
   2   3 -12   15.40    2.30
   1   3 -12   49.99    3.40
   1   3 -12   49.99    3.40
  -1  -3  12   45.20    3.30
   0   3 -12    4.80    1.40
   0   3 -12    3.10    1.10
   0  -3  12    4.90    1.30
  -1   3 -12   36.10    3.00
  -1   3 -12   37.70    3.10
   1  -3  12   39.50    3.10
  -2   3 -12  220.68    9.10
  -2   3 -12  210.48    9.10
   2  -3  12  215.38    8.90
  -3   3 -12   52.29    3.80
  -3   3 -12   52.89    3.80
   3  -3  12   45.20    2.60
   3  -3  12   50.49    3.50
  -4   3 -12   30.30    3.10
  -4   3 -12   34.70    3.20
   4  -3  12   31.80    2.50
   4  -3  12   41.30    5.80
  -5   3 -12   47.40    4.00
  -5   3 -12   45.80    3.80
   5  -3  12   50.59    3.70
   9   2 -12    1.70    1.20
   9   2 -12    0.90    1.40
   8   2 -12   97.09    4.60
   8   2 -12   94.09    6.00
   7   2 -12  223.88    8.00
   7   2 -12  220.18   10.00
   6   2 -12    9.50    1.20
   6   2 -12    7.30    1.80
   5   2 -12   31.20    2.90
   4   2 -12  174.28    8.00
   2   2 -12   33.80    2.80
   2   2 -12   37.00    3.00
   1   2 -12  171.08    7.70
   1   2 -12  172.78    7.60
   0   2 -12  178.68    7.90
   0  -2  12  184.28    8.40
  -1   2 -12  100.59    5.40
  -1   2 -12   97.29    5.50
   1  -2  12  100.19    5.20
  -2   2 -12   37.80    3.40
  -2   2 -12   44.80    3.40
   2  -2  12   44.20    3.10
  -3   2 -12   89.99    5.40
  -3   2 -12   91.99    5.50
   3  -2  12   98.59    4.00
   3  -2  12   93.19    5.10
  -4   2 -12   88.19    5.50
  -4   2 -12   84.29    5.30
   4  -2  12   89.09    4.10
   4  -2  12   87.69    4.90
  -5   2 -12   18.90    2.80
  -5   2 -12   20.40    3.20
   5  -2  12   18.00    2.50
   5  -2  12   19.10    2.50
   9   1 -12   67.39    4.00
   9   1 -12   62.09    5.00
   8   1 -12   95.39    4.60
   8   1 -12   91.09    6.00
   7   1 -12   59.29    3.10
   7   1 -12   61.09    4.60
   6   1 -12   38.30    3.50
   5   1 -12  276.47   11.40
   4   1 -12  254.47   10.60
   3   1 -12   60.49    4.10
   2   1 -12  106.49    5.70
   2   1 -12  100.19    5.30
   1   1 -12  266.27   10.50
   1   1 -12  255.67   10.60
   0   1 -12  177.98    8.00
   0   1 -12  170.98    7.90
   0  -1  12  180.38    8.60
  -1   1 -12  107.79    6.00
  -1   1 -12  117.69    6.10
   1  -1  12  117.89    7.00
  -2   1 -12  207.48    9.20
  -2   1 -12  207.28    9.10
   2  -1  12  196.48    8.40
  -3   1 -12  222.58    9.80
  -3   1 -12  223.78    9.70
   3  -1  12  210.78    7.50
   3  -1  12  214.78    8.80
  -4   1 -12   14.80    2.70
  -4   1 -12   14.60    2.50
   4  -1  12   17.70    1.80
   4  -1  12   16.60    2.30
  -5   1 -12  137.29    7.30
   5  -1  12  135.09    5.90
   5  -1  12  131.29    6.20
   9   0 -12  118.39    7.10
   9   0 -12  114.09    5.60
   8   0 -12   48.10    4.30
   8   0 -12   54.39    3.20
   7   0 -12   34.20    2.30
   7   0 -12   37.00    3.60
   6   0 -12  119.69    6.70
   5   0 -12  268.17   11.30
   4   0 -12  144.19    6.80
   4   0 -12  139.69    7.20
   3   0 -12   89.89    4.80
   3   0 -12   83.99    5.20
   2   0 -12  238.18   10.20
   2   0 -12  249.18    9.90
   1   0 -12  211.48    9.10
   1   0 -12  220.08    9.40
   0   0 -12   54.79    4.00
   0   0 -12   54.19    4.00
   0   0  12   47.80    3.90
  -1   0 -12  254.37   10.80
  -1   0 -12  263.47   10.90
  -2   0 -12  246.38   10.60
  -2   0 -12  236.08   10.50
  -3   0 -12   65.99    4.80
  -3   0 -12   66.49    4.70
   3   0  12   56.79    3.00
  -4   0 -12   73.99    5.30
   4   0  12   77.39    3.80
   4   0  12   72.89    4.30
   9  -1 -12   33.60    2.90
   9  -1 -12   31.00    3.80
   8  -1 -12    0.60    1.40
   8  -1 -12   -0.50    1.00
   7  -1 -12  113.09    4.70
   7  -1 -12  108.29    6.60
   6  -1 -12  155.38    8.00
   5  -1 -12  108.29    6.30
   5  -1 -12  119.09    5.40
   4  -1 -12   15.60    2.60
   4  -1 -12   17.10    2.00
   3  -1 -12  302.27   12.20
   3  -1 -12  298.27   11.40
   2  -1 -12   60.99    4.10
   2  -1 -12   57.69    4.30
   1  -1 -12   83.59    5.30
   1  -1 -12   89.49    5.30
   0  -1 -12  202.38    9.20
   0  -1 -12  195.38    9.10
   0   1  12  213.78    8.60
  -1  -1 -12  310.17   12.70
  -1  -1 -12  313.37   12.60
   1   1  12  307.47   12.20
  -2  -1 -12   66.59    4.80
  -2  -1 -12   61.99    4.60
   2   1  12   61.79    3.60
  -3  -1 -12   16.60    2.80
  -3  -1 -12   15.20    2.80
   3   1  12   15.70    2.20
  -4  -1 -12  134.39    7.60
  -4  -1 -12  137.29    7.70
   4   1  12  129.69    5.80
   8  -2 -12   19.90    2.20
   8  -2 -12   23.20    3.90
   7  -2 -12   53.09    4.50
   7  -2 -12   54.59    3.00
   6  -2 -12   23.70    3.50
   5  -2 -12    7.80    1.70
   5  -2 -12   10.50    2.40
   4  -2 -12   80.89    5.50
   4  -2 -12   90.69    4.80
   3  -2 -12   52.69    4.20
   3  -2 -12   57.09    4.00
   2  -2 -12    8.10    1.90
   2  -2 -12   10.70    2.30
   1  -2 -12  148.99    7.40
   1  -2 -12  138.59    7.40
   0  -2 -12   96.89    5.80
   0  -2 -12   90.59    5.70
   0   2  12   89.59    4.90
  -1  -2 -12   34.20    3.50
  -1  -2 -12   36.00    3.40
   1   2  12   36.80    2.80
  -2  -2 -12    9.40    2.40
  -2  -2 -12    9.20    2.30
   2   2  12    7.20    1.70
  -3  -2 -12   62.99    5.10
  -3  -2 -12   73.69    5.50
   3   2  12   68.89    3.80
   8  -3 -12    5.30    1.70
   8  -3 -12    1.60    1.30
   7  -3 -12   20.50    3.40
   7  -3 -12   18.40    2.10
   6  -3 -12   98.59    4.90
   6  -3 -12   93.89    6.10
   5  -3 -12   60.19    4.70
   5  -3 -12   59.19    3.80
   4  -3 -12   39.10    3.80
   4  -3 -12   34.80    3.10
   3  -3 -12   49.00    4.20
   3  -3 -12   51.19    3.90
   2  -3 -12   33.40    3.30
   2  -3 -12   42.80    3.80
   1  -3 -12   10.40    2.20
   1  -3 -12    7.20    1.70
   0  -3 -12   22.00    2.90
   0  -3 -12   15.30    2.60
   0   3  12   19.90    2.20
  -1  -3 -12   27.10    3.30
  -1  -3 -12   23.90    3.00
   1   3  12   26.40    2.60
  -2  -3 -12   24.60    3.90
  -2  -3 -12   24.80    3.70
   2   3  12   21.40    2.30
   6  -4 -12   96.69    5.10
   6  -4 -12  103.19    6.60
   5  -4 -12   11.30    2.20
   5  -4 -12   11.30    2.50
   4  -4 -12   65.09    4.40
   4  -4 -12   66.69    5.00
   3  -4 -12  101.79    5.90
   3  -4 -12  104.09    6.40
   2  -4 -12   78.29    5.60
   2  -4 -12   84.99    5.40
   1  -4 -12   12.40    2.50
   1  -4 -12   12.10    2.60
   0  -4 -12   93.89    6.30
   0  -4 -12   89.99    7.40
   0   4  12  101.59    5.00
  -1  -4 -12   93.19    6.10
  -1  -4 -12   83.99    5.90
   1   4  12   79.09    4.40
   6  -5 -12   12.30    2.80
   5  -5 -12   37.60    3.30
   4  -5 -12  297.17   11.70
   4  -5 -12  257.37   13.10
   3  -5 -12  108.79    7.00
   3  -5 -12  116.79    6.60
   2  -5 -12   37.20    3.70
   2  -5 -12   43.30    7.50
   1  -5 -12  140.89    8.10
   1  -5 -12  152.28    8.80
   0  -5 -12  129.39    7.40
   0  -5 -12  128.39    7.60
   0   5  12  124.09    5.90
   3  -6 -12   17.60    3.20
  -1 -14  13   55.19    5.20
   0 -14  13   57.79    4.80
   1 -14  13   43.00    4.00
  -4 -13  13   16.30    2.80
  -4 -13  13   14.00    3.00
  -3 -13  13   46.30    4.00
  -2 -13  13   20.50    3.10
  -1 -13  13    6.30    1.80
   0 -13  13   39.50    3.80
   1 -13  13    9.50    2.00
   1 -13  13   10.60    3.70
   2 -13  13    8.10    2.10
   2 -13  13    5.20    2.00
   3 -13  13   19.70    3.00
   3 -13  13   26.30    3.90
  -5 -12  13   67.29    4.50
  -5 -12  13   51.79    5.50
  -4 -12  13   45.10    3.80
  -3 -12  13   72.99    4.90
  -2 -12  13    0.30    1.10
  -1 -12  13   62.69    4.50
   0 -12  13  198.38    9.30
   1 -12  13   45.10    3.70
   1 -12  13   39.90    3.70
   2 -12  13   11.40    2.20
   3 -12  13   33.10    3.50
   3 -12  13   30.10    3.40
   4 -12  13   85.39    5.60
  -6 -11  13   29.40    3.20
  -6 -11  13   30.00    3.70
  -5 -11  13  125.39    6.60
  -5 -11  13  114.59    7.00
  -4 -11  13  204.78    9.20
  -3 -11  13   85.99    5.30
  -2 -11  13   57.79    4.20
  -1 -11  13  243.58   10.50
   0 -11  13  170.88    8.30
   1 -11  13   37.20    3.50
   1 -11  13   28.00    2.90
   2 -11  13  219.68   10.00
   2 -11  13  216.78    9.20
   3 -11  13  156.18    8.60
   3 -11  13  167.18    7.80
   4 -11  13   34.20    3.60
   4 -11  13   31.40    3.50
  -6 -10  13   62.39    4.80
  -6 -10  13   64.29    4.60
  -5 -10  13  167.68    8.00
  -4 -10  13   36.70    3.30
   3  10 -13   73.69    3.80
  -3 -10  13   66.49    4.60
   2  10 -13  257.17    9.00
  -2 -10  13  254.57   10.70
  -1 -10  13  210.98    9.40
   0 -10  13   35.00    3.20
   1 -10  13  127.89    6.00
   1 -10  13  130.39    7.00
   2 -10  13  275.27   11.10
   2 -10  13  275.57   11.70
   3 -10  13   58.69    4.10
   3 -10  13   67.99    4.80
   4 -10  13   60.29    4.30
   5 -10  13  213.88    9.50
   5 -10  13  213.48   10.10
  -7  -9  13   23.80    3.30
  -7  -9  13   28.00    3.30
  -6  -9  13  135.79    7.00
   5   9 -13   72.09    4.50
  -5  -9  13   73.49    4.70
   4   9 -13   12.40    1.90
  -4  -9  13   11.80    2.30
   3   9 -13  160.78    6.60
  -3  -9  13  146.49    7.40
   2   9 -13  180.08    7.00
  -2  -9  13  180.38    8.30
   1   9 -13    3.80    1.00
  -1  -9  13    3.70    1.40
   0   9 -13   66.79    3.30
   0  -9  13   62.79    4.40
   0  -9  13   68.19    3.70
  -1   9 -13  187.08    7.20
   1  -9  13  212.68    9.30
   1  -9  13  209.08    8.00
  -2   9 -13  106.39    4.50
   2  -9  13   97.59    5.10
   2  -9  13  104.09    6.10
  -3   9 -13   23.00    2.10
   3  -9  13   26.60    2.80
   3  -9  13   22.00    3.30
  -4   9 -13  130.09    5.70
   4  -9  13  134.59    6.60
   4  -9  13  133.79    7.20
   5  -9  13   79.29    5.00
   5  -9  13   73.79    5.30
  -7  -8  13    8.90    2.20
   6   8 -13   23.20    2.70
   5   8 -13   -0.70    1.00
  -5  -8  13    0.70    0.90
   4   8 -13   28.50    2.60
  -4  -8  13   25.30    2.70
   3   8 -13   36.10    2.80
  -3  -8  13   35.00    3.10
   2   8 -13   63.09    3.60
  -2  -8  13   63.49    4.30
   1   8 -13   32.10    2.40
  -1  -8  13   33.40    3.10
   0   8 -13  162.58    6.60
   0  -8  13  166.98    6.50
   0  -8  13  170.78    7.90
  -1   8 -13   66.59    3.60
   1  -8  13   66.89    4.50
   1  -8  13   66.69    3.60
  -2   8 -13    4.30    1.00
   2  -8  13    5.40    1.40
   2  -8  13    4.80    1.20
  -3   8 -13   38.40    2.80
   3  -8  13   41.30    3.00
   3  -8  13   38.80    3.50
  -4   8 -13   80.69    4.40
   4  -8  13   84.89    4.80
   4  -8  13   88.69    5.50
  -5   8 -13    5.50    2.30
   5  -8  13    5.40    1.60
   8   7 -13    4.20    1.30
   8   7 -13    4.20    1.70
  -8  -7  13    7.70    2.10
   7   7 -13   52.59    4.20
   6   7 -13  144.89    7.30
   5   7 -13  150.18    7.20
   4   7 -13   21.00    2.30
  -4  -7  13   17.60    2.60
   3   7 -13  143.99    6.60
  -3  -7  13  163.18    7.50
   2   7 -13  158.68    7.00
  -2  -7  13  181.08    8.00
   1   7 -13    4.60    1.20
  -1  -7  13    4.50    1.00
  -1  -7  13    5.20    1.50
   0   7 -13   38.60    2.70
   0  -7  13   33.50    3.10
  -1   7 -13  158.38    6.60
   1  -7  13  146.19    7.40
   1  -7  13  159.88    6.10
  -2   7 -13   81.19    4.30
   2  -7  13   77.69    4.90
   2  -7  13   79.39    3.90
  -3   7 -13   13.70    2.00
   3  -7  13   15.70    2.60
   3  -7  13   15.00    1.90
  -4   7 -13   16.10    2.40
   4  -7  13   26.30    2.70
   4  -7  13   25.20    2.50
  -5   7 -13   55.09    3.90
   5  -7  13   51.89    4.20
   5  -7  13   49.60    3.70
   8   6 -13   28.40    3.50
   8   6 -13   32.50    2.70
  -8  -6  13   27.60    2.90
   7   6 -13  153.38    6.50
   7   6 -13  168.08    8.30
   6   6 -13  203.58    9.10
   5   6 -13   20.10    2.40
   4   6 -13  123.19    6.90
   3   6 -13  290.37   10.80
  -3  -6  13  264.47   11.10
   2   6 -13   24.10    2.30
  -2  -6  13   17.00    2.50
   1   6 -13   72.19    4.10
  -1  -6  13   74.19    4.70
   0   6 -13  263.77    9.90
   0  -6  13  259.27   10.70
  -1   6 -13  390.16   13.70
   1  -6  13  387.56   14.50
   1  -6  13  383.16   12.30
  -2   6 -13   27.50    2.50
   2  -6  13   30.00    2.10
   2  -6  13   31.70    3.00
  -3   6 -13   75.29    4.40
   3  -6  13   71.89    4.80
   3  -6  13   79.79    3.90
  -4   6 -13  219.28    9.10
   4  -6  13  204.88    9.50
   4  -6  13  217.38    8.40
  -5   6 -13   37.40    3.40
   5  -6  13   43.60    3.30
   5  -6  13   40.60    3.70
   8   5 -13   60.59    4.90
   8   5 -13   63.89    3.60
   7   5 -13   81.89    3.90
   7   5 -13   78.49    5.20
   6   5 -13   21.50    2.60
   5   5 -13  231.58    9.80
   4   5 -13  451.45   16.50
   3   5 -13  504.65   17.50
   2   5 -13    4.50    1.40
  -2  -5  13    7.10    1.50
   1   5 -13  186.28    7.90
  -1  -5  13  184.08    8.30
   0   5 -13  561.84   18.80
   0  -5  13  549.95   19.30
  -1   5 -13  130.69    6.10
   1  -5  13  121.39    6.30
  -2   5 -13  214.98    8.90
   2  -5  13  210.58    9.20
  -3   5 -13  274.57   10.90
   3  -5  13  280.87    9.50
   3  -5  13  265.27   11.20
  -4   5 -13  170.88    8.00
   4  -5  13  170.98    8.20
   4  -5  13  174.28    6.90
  -5   5 -13   26.40    2.90
   5  -5  13   22.40    2.30
   5  -5  13   21.10    3.00
   8   4 -13   66.09    5.10
   7   4 -13   63.49    4.80
   7   4 -13   62.19    3.20
   6   4 -13  140.49    7.20
   5   4 -13  153.78    7.40
   4   4 -13  240.88   10.00
   2   4 -13  196.38    8.40
   1   4 -13  504.05   17.40
  -1  -4  13  498.95   17.60
   0   4 -13  163.58    7.40
   0  -4  13  156.78    7.40
   1  -4  13   89.89    5.10
  -2   4 -13  176.38    7.80
   2  -4  13  171.98    7.90
  -3   4 -13  221.68    9.40
   3  -4  13  213.68    9.30
   3  -4  13  214.98    7.60
  -4   4 -13   12.40    2.40
   4  -4  13   10.90    1.60
   4  -4  13    8.40    1.80
  -5   4 -13  155.68    7.70
   5  -4  13  142.89    7.50
   5  -4  13  144.69    7.30
   9   3 -13   25.90    2.60
   9   3 -13   28.50    3.40
   8   3 -13   10.80    1.60
   8   3 -13   11.60    2.50
   7   3 -13    3.10    1.50
   7   3 -13    3.60    1.10
   6   3 -13   81.49    3.50
   6   3 -13   86.69    5.30
   5   3 -13  131.49    6.90
   4   3 -13    8.80    1.90
   3   3 -13  151.28    7.20
   2   3 -13  207.58    9.00
   1   3 -13   86.39    5.20
  -1  -3  13   91.49    5.10
   0   3 -13    1.20    1.00
   0   3 -13    2.60    1.20
   0  -3  13    1.60    1.10
  -1   3 -13  177.08    8.00
  -1   3 -13  171.08    7.80
   1  -3  13  170.08    7.70
  -2   3 -13  163.18    7.60
  -2   3 -13  160.98    7.80
   2  -3  13  162.68    7.50
  -3   3 -13    5.60    1.70
  -3   3 -13    6.00    1.70
   3  -3  13    6.80    1.60
  -4   3 -13   24.20    3.00
  -4   3 -13   25.80    3.00
   4  -3  13   25.80    3.20
   4  -3  13   28.60    2.20
  -5   3 -13  142.89    7.80
  -5   3 -13  147.79    7.70
   5  -3  13  150.08    6.50
   5  -3  13  158.88    7.30
   9   2 -13    7.20    2.40
   9   2 -13    7.30    1.60
   8   2 -13   22.80    2.10
   8   2 -13   22.60    3.50
   7   2 -13   39.20    2.40
   7   2 -13   43.10    3.90
   6   2 -13    5.60    1.70
   5   2 -13   25.90    2.90
   4   2 -13   18.10    2.30
   3   2 -13   41.30    3.40
   2   2 -13   33.20    3.00
   2   2 -13   31.60    2.80
   1   2 -13   49.80    3.70
   1   2 -13   47.70    3.60
  -1  -2  13   50.99    3.60
   0   2 -13   97.59    5.50
   0   2 -13  106.59    5.70
   0  -2  13  104.69    5.50
  -1   2 -13   83.29    5.00
  -1   2 -13   84.49    5.10
   1  -2  13   82.09    4.80
  -2   2 -13   36.30    3.40
  -2   2 -13   33.80    3.30
   2  -2  13   37.30    3.10
  -3   2 -13    6.00    1.80
  -3   2 -13    8.60    2.00
   3  -2  13    6.60    1.00
   3  -2  13    9.10    2.00
  -4   2 -13   27.90    3.20
   4  -2  13   34.80    3.00
   4  -2  13   32.80    2.30
   8   1 -13   19.60    2.00
   8   1 -13   15.50    3.30
   7   1 -13   17.20    1.70
   7   1 -13   21.50    3.20
   6   1 -13   91.29    5.80
   5   1 -13  111.89    6.30
   4   1 -13   13.60    2.40
   3   1 -13  106.09    6.00
   3   1 -13  106.39    5.50
   2   1 -13  160.48    7.30
   2   1 -13  156.48    7.60
   1   1 -13  176.98    8.00
   1   1 -13  170.98    8.20
   0   1 -13    0.80    0.90
   0  -1  13    0.80    0.80
  -1   1 -13  107.59    6.10
  -1   1 -13  107.69    6.10
   1  -1  13  105.19    5.60
  -2   1 -13   73.19    5.10
  -2   1 -13   78.89    5.20
   2  -1  13   87.19    4.90
  -3   1 -13    5.20    1.80
  -3   1 -13    8.70    2.10
   3  -1  13    4.90    1.50
  -4   1 -13    4.40    1.70
   4  -1  13    6.10    1.40
   4  -1  13    5.10    1.60
   8   0 -13    2.80    1.20
   8   0 -13    2.40    1.80
   7   0 -13   59.69    4.80
   6   0 -13  199.08    9.50
   5   0 -13   48.10    4.20
   4   0 -13   41.90    3.80
   4   0 -13   39.80    3.00
   3   0 -13  288.37   12.00
   3   0 -13  296.97   11.40
   2   0 -13  133.59    7.00
   2   0 -13  133.49    6.70
   1   0 -13  100.39    6.00
   1   0 -13  107.29    5.80
   0   0 -13  157.88    7.70
   0   0 -13  155.18    7.80
   0   0  13  152.48    7.10
  -1   0 -13  245.48   11.00
  -1   0 -13  268.07   11.20
   1   0  13  258.87   10.30
  -2   0 -13  187.88    8.90
  -2   0 -13  176.08    8.90
   2   0  13  181.58    7.80
  -3   0 -13   38.30    3.50
  -3   0 -13   40.40    3.90
   3   0  13   36.60    3.10
   7  -1 -13  106.09    6.70
   6  -1 -13  107.89    6.60
   5  -1 -13    5.30    1.80
   5  -1 -13    8.00    1.80
   4  -1 -13  198.48    8.40
   4  -1 -13  195.28    9.40
   3  -1 -13  131.09    7.10
   3  -1 -13  129.69    6.50
   2  -1 -13  107.19    5.80
   2  -1 -13  104.79    6.30
   1  -1 -13   76.39    5.10
   1  -1 -13   74.19    5.00
   0  -1 -13  287.07   12.00
   0  -1 -13  279.07   11.90
   0   1  13  287.47   11.00
  -1  -1 -13  144.99    7.60
  -1  -1 -13  134.39    7.40
   1   1  13  145.89    6.70
  -2  -1 -13   33.30    3.60
  -2  -1 -13   37.00    5.80
   2   1  13   31.80    2.80
  -3  -1 -13  191.78    9.60
  -3  -1 -13  202.08   10.00
   3   1  13  203.08    8.20
   7  -2 -13   60.39    6.20
   6  -2 -13    0.40    1.30
   5  -2 -13   85.29    4.70
   5  -2 -13   75.09    5.50
   4  -2 -13  108.89    5.80
   4  -2 -13  118.69    6.90
   3  -2 -13   31.10    3.10
   3  -2 -13   29.80    3.30
   2  -2 -13   47.90    4.10
   2  -2 -13   50.59    4.00
   1  -2 -13  274.07   11.70
   1  -2 -13  284.07   12.20
   0  -2 -13   94.69    6.00
   0  -2 -13   86.89    5.70
   0   2  13   81.59    4.70
  -1  -2 -13   13.60    2.80
   1   2  13   10.20    1.90
  -2  -2 -13   88.29    6.00
  -2  -2 -13   90.89    6.20
   2   2  13   95.79    4.90
   7  -3 -13   11.40    2.40
   6  -3 -13   23.40    4.60
   6  -3 -13   23.20    2.50
   5  -3 -13   57.49    4.00
   5  -3 -13   56.19    4.70
   4  -3 -13    2.60    1.70
   4  -3 -13    2.70    1.20
   3  -3 -13   13.40    2.70
   3  -3 -13   14.60    2.20
   2  -3 -13   80.29    5.20
   2  -3 -13   83.59    5.80
   1  -3 -13   72.79    5.40
   1  -3 -13   76.29    5.30
   0  -3 -13   20.00    3.30
   0   3  13   25.40    2.70
  -1  -3 -13    6.20    2.00
  -1  -3 -13    8.20    2.40
   1   3  13   11.40    2.10
   6  -4 -13    3.50    1.90
   6  -4 -13    4.20    1.50
   5  -4 -13   55.29    3.80
   5  -4 -13   47.40    4.40
   4  -4 -13   48.70    4.00
   4  -4 -13   36.70    6.10
   3  -4 -13   25.80    3.10
   2  -4 -13    1.80    1.50
   2  -4 -13    1.70    1.30
   1  -4 -13   21.10    3.60
   1  -4 -13   28.60    3.40
  -3 -13  14   15.50    2.70
  -2 -13  14   96.29    6.10
   0 -13  14    2.10    1.60
   1 -13  14   29.00    3.60
   1 -13  14   35.30    3.70
  -4 -12  14   26.20    3.00
  -3 -12  14   10.00    2.10
  -2 -12  14   13.70    2.50
  -1 -12  14   29.70    3.30
   0 -12  14   21.90    3.30
   1 -12  14   14.40    2.60
   2 -12  14   31.30    3.50
   2 -12  14   33.70    3.50
   3 -12  14   15.50    2.60
   3 -12  14   11.20    2.40
  -5 -11  14   88.29    5.60
  -4 -11  14   39.20    3.50
  -3 -11  14   11.80    2.30
  -2 -11  14  153.08    7.80
  -1 -11  14   96.19    5.90
   0 -11  14    4.50    1.60
   1 -11  14    9.80    2.30
   1 -11  14   14.30    2.30
   2 -11  14  144.89   11.00
   2 -11  14  143.79    7.00
   3 -11  14   21.80    3.00
   3 -11  14   31.30    3.40
  -6 -10  14  140.19    7.40
  -5 -10  14  115.99    6.60
   4  10 -14   18.40    2.30
  -4 -10  14   21.80    3.10
   3  10 -14   89.29    4.30
  -3 -10  14   75.89    5.20
   2  10 -14  371.06   12.50
  -2 -10  14  365.16   14.30
   1  10 -14   25.40    2.10
  -1 -10  14   33.50    3.20
   0 -10  14   84.09    5.40
   0 -10  14   89.19    4.60
   1 -10  14  166.78    7.30
   1 -10  14  169.88    8.50
   2 -10  14  155.78    8.00
   2 -10  14  139.29    6.90
   3 -10  14   21.30    2.80
   4 -10  14  107.99    6.00
   4 -10  14  109.69    6.70
  -7  -9  14   62.09    4.90
  -7  -9  14   80.89    5.30
   6   9 -14  105.39    5.90
  -6  -9  14   97.99    5.90
   5   9 -14   37.10    3.30
  -5  -9  14   37.30    3.40
   4   9 -14  151.38    7.80
  -4  -9  14  165.48    8.00
   3   9 -14  284.57   10.70
  -3  -9  14  295.47   12.00
   2   9 -14  135.49    5.90
  -2  -9  14  143.19    7.30
   1   9 -14   23.20    2.10
  -1  -9  14   21.00    3.00
  -1  -9  14   21.90    2.10
   0   9 -14  241.88    8.90
   0  -9  14  246.08    9.00
   0  -9  14  255.17   10.80
  -1   9 -14  103.89    4.70
   1  -9  14  109.69    6.20
   1  -9  14  103.59    5.00
  -2   9 -14   33.80    2.60
   2  -9  14   36.30    3.50
   2  -9  14   34.20    2.90
  -3   9 -14  200.38    7.90
   3  -9  14  209.38    8.70
   3  -9  14  216.38   10.00
   4  -9  14  154.78    7.20
   4  -9  14  157.38    8.20
   7   8 -14   44.80    4.10
   6   8 -14    8.60    2.10
   5   8 -14   68.39    4.50
  -5  -8  14   60.69    4.60
   4   8 -14  111.39    6.30
  -4  -8  14  106.39    6.10
   3   8 -14   41.60    3.10
  -3  -8  14   41.20    3.60
   2   8 -14   17.70    2.10
  -2  -8  14   20.90    3.00
   1   8 -14  190.88    7.70
  -1  -8  14  208.68    9.10
  -1  -8  14  185.18    6.90
   0   8 -14  196.48    7.80
   0  -8  14  199.88    7.30
   0  -8  14  198.88    9.10
  -1   8 -14   12.70    1.90
   1  -8  14   17.40    2.80
   1  -8  14   15.30    1.80
  -2   8 -14   85.99    4.40
   2  -8  14   86.89    5.50
   2  -8  14   90.99    4.40
  -3   8 -14  220.68    8.90
   3  -8  14  232.88    8.80
   3  -8  14  225.68   10.30
  -4   8 -14   43.00    3.80
   4  -8  14   45.40    5.20
   4  -8  14   49.70    3.40
   7   7 -14   27.90    3.20
   6   7 -14   17.60    2.70
   5   7 -14   21.20    2.60
   4   7 -14   33.50    2.90
  -4  -7  14   26.60    2.90
[truncated: 20,124 more chars]
