# Supplementary material for: Exploring the Interaction of Pyridine-Based Chalcones with Trinuclear Silver(I) Pyrazolate Complex
Source: MDPI journal article supplement (doi:10.3390/inorganics11040175), 2023-04-21
Supplement: s1 [file s1 › E-2Ag.cif]

data_a
_audit_creation_date               2023-03-30
_audit_creation_method
;
Olex2 1.5
(compiled 2022.04.07 svn.rca3783a0 for OlexSys, GUI svn.r6498)
;
_shelx_SHELXL_version_number       '2018/3'
_audit_contact_author_address      ?
_audit_contact_author_email        ?
_audit_contact_author_name         ''
_audit_contact_author_phone        ?
_publ_contact_author_id_orcid      ?
_publ_section_references
;
Dolomanov, O.V., Bourhis, L.J., Gildea, R.J, Howard, J.A.K. & Puschmann, H.
 (2009), J. Appl. Cryst. 42, 339-341.

Sheldrick, G.M. (2008). Acta Cryst. A64, 112-122.

Sheldrick, G.M. (2015). Acta Cryst. A71, 3-8.
;
_chemical_name_common              ?
_chemical_name_systematic          ?
_chemical_formula_moiety           'C15 H3 Ag3 F18 N6, C14 H11 N O, 0.25(H2 O)'
_chemical_formula_sum              'C29 H14.50 Ag3 F18 N7 O1.25'
_chemical_formula_weight           1146.59
_chemical_melting_point            ?
loop_
  _atom_type_symbol
  _atom_type_description
  _atom_type_scat_dispersion_real
  _atom_type_scat_dispersion_imag
  _atom_type_scat_source
 'C' 'C' 0.0033 0.0016 'International Tables Vol C Tables 4.2.6.8 and 6.1.1.4'
 'H' 'H' 0.0000 0.0000 'International Tables Vol C Tables 4.2.6.8 and 6.1.1.4'
 'Ag' 'Ag' -0.8971 1.1015
 'International Tables Vol C Tables 4.2.6.8 and 6.1.1.4'
 'F' 'F' 0.0171 0.0103 'International Tables Vol C Tables 4.2.6.8 and 6.1.1.4'
 'N' 'N' 0.0061 0.0033 'International Tables Vol C Tables 4.2.6.8 and 6.1.1.4'
 'O' 'O' 0.0106 0.0060 'International Tables Vol C Tables 4.2.6.8 and 6.1.1.4'

_shelx_space_group_comment
;
The symmetry employed for this shelxl refinement is uniquely defined
by the following loop, which should always be used as a source of
symmetry information in preference to the above space-group names.
They are only intended as comments.
;
_space_group_crystal_system        'monoclinic'
_space_group_IT_number             14
_space_group_name_H-M_alt          'P 1 21/c 1'
_space_group_name_Hall             '-P 2ybc'
loop_
  _space_group_symop_operation_xyz
 'x, y, z'
 '-x, y+1/2, -z+1/2'
 '-x, -y, -z'
 'x, -y-1/2, z-1/2'

_cell_length_a                     12.8452(5)
_cell_length_b                     22.8123(8)
_cell_length_c                     13.0509(5)
_cell_angle_alpha                  90
_cell_angle_beta                   115.750(2)
_cell_angle_gamma                  90
_cell_volume                       3444.5(2)
_cell_formula_units_Z              4
_cell_measurement_reflns_used      9970
_cell_measurement_temperature      100
_cell_measurement_theta_max        29.51
_cell_measurement_theta_min        2.51
_shelx_estimated_absorpt_T_max     0.824
_shelx_estimated_absorpt_T_min     0.668
_exptl_absorpt_coefficient_mu      1.826
_exptl_absorpt_correction_T_max    0.811
_exptl_absorpt_correction_T_min    0.692
_exptl_absorpt_correction_type     multi-scan
_exptl_absorpt_process_details     SADABS
_exptl_absorpt_special_details     ?
_exptl_crystal_colour              colourless
_exptl_crystal_colour_primary      colourless
_exptl_crystal_density_diffrn      2.211
_exptl_crystal_density_meas        ?
_exptl_crystal_density_method      ?
_exptl_crystal_description         prism
_exptl_crystal_F_000               2202
_exptl_crystal_size_max            0.24
_exptl_crystal_size_mid            0.17
_exptl_crystal_size_min            0.11
_exptl_transmission_factor_max     ?
_exptl_transmission_factor_min     ?
_diffrn_reflns_av_R_equivalents    0.0512
_diffrn_reflns_av_unetI/netI       0.0415
_diffrn_reflns_Laue_measured_fraction_full  0.999
_diffrn_reflns_Laue_measured_fraction_max  0.996
_diffrn_reflns_limit_h_max         17
_diffrn_reflns_limit_h_min         -16
_diffrn_reflns_limit_k_max         31
_diffrn_reflns_limit_k_min         -31
_diffrn_reflns_limit_l_max         18
_diffrn_reflns_limit_l_min         -17
_diffrn_reflns_number              47024
_diffrn_reflns_point_group_measured_fraction_full  0.999
_diffrn_reflns_point_group_measured_fraction_max  0.996
_diffrn_reflns_theta_full          25.242
_diffrn_reflns_theta_max           29.651
_diffrn_reflns_theta_min           1.949
_diffrn_ambient_temperature        100
_diffrn_detector_area_resol_mean   ?
_diffrn_measured_fraction_theta_full  0.999
_diffrn_measured_fraction_theta_max  0.996
_diffrn_measurement_device_type    'Bruker APEX-II CCD'
_diffrn_measurement_method         '\f and \w scans'
_diffrn_radiation_type             MoK\a
_diffrn_radiation_wavelength       0.71073
_diffrn_source                     ?
_diffrn_source_current             1.4
_diffrn_source_power               0.07
_diffrn_source_voltage             50.0
_diffrn_standards_number           0
_reflns_Friedel_coverage           0.000
_reflns_Friedel_fraction_full      .
_reflns_Friedel_fraction_max       .
_reflns_number_gt                  8001
_reflns_number_total               9692
_reflns_special_details
;
 Reflections were merged by SHELXL according to the crystal
 class for the calculation of statistics and refinement.
 
 _reflns_Friedel_fraction is defined as the number of unique
 Friedel pairs measured divided by the number that would be
 possible theoretically, ignoring centric projections and
 systematic absences.
;
_reflns_threshold_expression       'I > 2\s(I)'
_computing_cell_refinement         'SAINT V8.40A (Bruker, 2019)'
_computing_data_collection         ?
_computing_data_reduction          'SAINT V8.40A (Bruker, 2019)'
_computing_molecular_graphics      'Olex2 1.5 (Dolomanov et al., 2009)'
_computing_publication_material    'Olex2 1.5 (Dolomanov et al., 2009)'
_computing_structure_refinement    'XL  (Sheldrick, 2008)'
_computing_structure_solution      'SHELXT 2014/5 (Sheldrick, 2014)'
_refine_diff_density_max           1.774
_refine_diff_density_min           -0.988
_refine_diff_density_rms           0.136
_refine_ls_extinction_coef         .
_refine_ls_extinction_method       none
_refine_ls_goodness_of_fit_ref     1.032
_refine_ls_hydrogen_treatment      constr
_refine_ls_matrix_type             full
_refine_ls_number_parameters       584
_refine_ls_number_reflns           9692
_refine_ls_number_restraints       66
_refine_ls_R_factor_all            0.0512
_refine_ls_R_factor_gt             0.0388
_refine_ls_restrained_S_all        1.070
_refine_ls_shift/su_max            0.001
_refine_ls_shift/su_mean           0.000
_refine_ls_structure_factor_coef   Fsqd
_refine_ls_weighting_details      
 'w=1/[\s^2^(Fo^2^)+(0.0341P)^2^+11.8622P] where P=(Fo^2^+2Fc^2^)/3'
_refine_ls_weighting_scheme        calc
_refine_ls_wR_factor_gt            0.0888
_refine_ls_wR_factor_ref           0.0956
_refine_special_details            ?
_olex2_refinement_description
;
1. Fixed Uiso
 At 1.2 times of:
  All C(H) groups
 At 1.5 times of:
  All O(H,H) groups
2. Uiso/Uaniso restraints and constraints
Uanis(F22) \\sim Ueq, Uanis(F23) \\sim Ueq, Uanis(F24) \\sim Ueq: with sigma of
0.001 and sigma for terminal atoms of 0.002
Uanis(F10) \\sim Ueq, Uanis(F12) \\sim Ueq, Uanis(F11) \\sim Ueq: with sigma of
0.05 and sigma for terminal atoms of 0.1
Uanis(F10) \\sim Ueq, Uanis(F11) \\sim Ueq, Uanis(F12) \\sim Ueq: with sigma of
0.001 and sigma for terminal atoms of 0.002
Uanis(F19) \\sim Ueq, Uanis(F17) \\sim Ueq, Uanis(F16) \\sim Ueq: with sigma of
0.001 and sigma for terminal atoms of 0.002
Uanis(F20) \\sim Ueq, Uanis(F21) \\sim Ueq, Uanis(F19) \\sim Ueq: with sigma of
0.001 and sigma for terminal atoms of 0.002
3. Others
 Fixed Sof: F10(0.75) F11(0.75) F12(0.75) F16(0.75) F17(0.75) F18(0.75)
 O1W(0.25) H1WA(0.25) H1WB(0.25) F21(0.25) F19(0.25) F20(0.25) F24(0.25)
 F23(0.25) F22(0.25)
4.a Free rotating group:
 O1W(H1WA,H1WB)
4.b Aromatic/amide H refined with riding coordinates:
 C2(H2), C7(H7), C12(H12), C17(H17), C18(H18), C20(H20), C21(H21), C22(H22),
 C23(H23), C24(H24), C26(H26), C27(H27), C28(H28), C29(H29)
;
_atom_sites_solution_hydrogens     mixed
_atom_sites_solution_primary       dual
_atom_sites_solution_secondary     ?
loop_
  _atom_site_label
  _atom_site_type_symbol
  _atom_site_fract_x
  _atom_site_fract_y
  _atom_site_fract_z
  _atom_site_U_iso_or_equiv
  _atom_site_adp_type
  _atom_site_occupancy
  _atom_site_site_symmetry_order
  _atom_site_calc_flag
  _atom_site_refinement_flags_posn
  _atom_site_refinement_flags_adp
  _atom_site_refinement_flags_occupancy
  _atom_site_disorder_assembly
  _atom_site_disorder_group
 Ag1 Ag 0.82197(2) 0.73633(2) 0.44211(2) 0.01816(7) Uani 1 1 d . . . . .
 Ag2 Ag 0.55649(2) 0.68314(2) 0.40202(2) 0.01917(7) Uani 1 1 d . . . . .
 Ag3 Ag 0.59976(2) 0.83516(2) 0.39988(2) 0.01915(7) Uani 1 1 d . . . . .
 F1 F 1.0187(2) 0.65751(12) 0.4696(3) 0.0544(9) Uani 1 1 d . . . . .
 F2 F 0.9510(2) 0.61617(14) 0.3055(3) 0.0469(7) Uani 1 1 d . . . . .
 F3 F 1.0347(2) 0.56437(12) 0.4560(3) 0.0423(7) Uani 1 1 d . . . . .
 F4 F 0.5200(2) 0.51593(13) 0.3044(2) 0.0418(7) Uani 1 1 d . . . . .
 F5 F 0.6347(2) 0.47738(10) 0.4625(2) 0.0335(6) Uani 1 1 d . . . . .
 F6 F 0.5369(2) 0.55438(11) 0.4607(3) 0.0372(6) Uani 1 1 d . . . . .
 F7 F 0.3105(3) 0.63153(12) 0.3288(4) 0.0600(10) Uani 1 1 d . . . . .
 F8 F 0.3151(4) 0.66403(18) 0.4823(3) 0.0837(15) Uani 1 1 d . . . . .
 F9 F 0.1598(2) 0.67087(13) 0.3279(3) 0.0503(8) Uani 1 1 d . . . . .
 F10 F 0.4031(4) 0.9199(2) 0.3289(5) 0.0481(13) Uani 0.75 1 d . U P A 1
 F11 F 0.2313(4) 0.9111(2) 0.3101(5) 0.0531(11) Uani 0.75 1 d . U P A 1
 F12 F 0.2677(5) 0.8948(2) 0.1718(5) 0.0698(15) Uani 0.75 1 d . U P A 1
 F13 F 0.6435(2) 0.96904(11) 0.4088(3) 0.0408(7) Uani 1 1 d . . . . .
 F14 F 0.8000(2) 1.01977(10) 0.4741(3) 0.0368(6) Uani 1 1 d . . . . .
 F15 F 0.7472(3) 0.97494(11) 0.5882(2) 0.0380(6) Uani 1 1 d . . . . .
 F16 F 1.1550(3) 0.86007(18) 0.5849(4) 0.0498(10) Uani 0.75 1 d . U P B 1
 F17 F 1.0711(5) 0.8156(3) 0.4271(5) 0.0664(14) Uani 0.75 1 d . U P B 1
 F18 F 1.0802(4) 0.77715(18) 0.5778(4) 0.0432(11) Uani 0.75 1 d . . P B 1
 N1 N 0.7870(3) 0.64604(13) 0.4202(3) 0.0171(6) Uani 1 1 d . . . . .
 N2 N 0.6879(3) 0.62455(13) 0.4185(3) 0.0174(6) Uani 1 1 d . . . . .
 N3 N 0.4228(3) 0.74270(13) 0.3728(3) 0.0191(6) Uani 1 1 d . . . . .
 N4 N 0.4336(3) 0.79977(13) 0.3498(3) 0.0176(6) Uani 1 1 d . . . . .
 N5 N 0.7707(3) 0.86510(13) 0.4565(3) 0.0180(6) Uani 1 1 d . . . . .
 N6 N 0.8551(3) 0.82667(12) 0.4657(3) 0.0170(6) Uani 1 1 d . . . . .
 C1 C 0.8514(3) 0.60051(15) 0.4171(3) 0.0206(7) Uani 1 1 d . . . . .
 C2 C 0.7951(3) 0.54811(16) 0.4124(3) 0.0222(7) Uani 1 1 d . . . . .
 H2 H 0.820633 0.509386 0.409019 0.027 Uiso 1 1 calc R U . . .
 C3 C 0.6931(3) 0.56569(15) 0.4139(3) 0.0188(7) Uani 1 1 d . . . . .
 C4 C 0.9643(3) 0.60993(17) 0.4132(4) 0.0290(9) Uani 1 1 d . . . . .
 C5 C 0.5961(3) 0.52855(16) 0.4100(3) 0.0234(8) Uani 1 1 d . . . . .
 C6 C 0.3110(3) 0.73356(17) 0.3496(3) 0.0212(7) Uani 1 1 d . . . . .
 C7 C 0.2475(3) 0.78431(17) 0.3122(3) 0.0232(8) Uani 1 1 d . . . . .
 H7 H 0.167459 0.790218 0.290484 0.028 Uiso 1 1 calc R U . . .
 C8 C 0.3290(3) 0.82465(16) 0.3141(3) 0.0209(7) Uani 1 1 d . . . . .
 C9 C 0.2742(4) 0.6752(2) 0.3722(4) 0.0330(10) Uani 1 1 d . . . . .
 C10 C 0.3118(3) 0.88755(18) 0.2801(4) 0.0291(9) Uani 1 1 d . . . . .
 C11 C 0.8204(3) 0.91816(15) 0.4839(3) 0.0186(7) Uani 1 1 d . . . . .
 C12 C 0.9369(3) 0.91540(16) 0.5121(3) 0.0206(7) Uani 1 1 d . . . . .
 H12 H 0.991843 0.946334 0.534811 0.025 Uiso 1 1 calc R U . . .
 C13 C 0.9541(3) 0.85656(16) 0.4992(3) 0.0194(7) Uani 1 1 d . . . . .
 C14 C 0.7522(3) 0.97014(16) 0.4882(4) 0.0248(8) Uani 1 1 d . . . . .
 C15 C 1.0632(4) 0.82640(18) 0.5167(4) 0.0288(9) Uani 1 1 d . . . . .
 O1 O 0.9201(3) 0.70527(14) 0.6801(3) 0.0348(7) Uani 1 1 d . . . . .
 N7 N 0.9535(4) 0.58519(19) 0.7204(4) 0.0423(10) Uani 1 1 d . . . . .
 C16 C 0.8400(4) 0.67755(18) 0.6860(3) 0.0275(8) Uani 1 1 d . . . . .
 C17 C 0.7318(4) 0.70557(18) 0.6731(3) 0.0276(8) Uani 1 1 d . . . . .
 H17 H 0.669378 0.682305 0.670518 0.033 Uiso 1 1 calc R U . . .
 C18 C 0.7215(4) 0.76479(18) 0.6648(3) 0.0249(8) Uani 1 1 d . . . . .
 H18 H 0.786960 0.785952 0.668899 0.030 Uiso 1 1 calc R U . . .
 C19 C 0.6204(3) 0.79932(17) 0.6501(3) 0.0225(7) Uani 1 1 d . . . . .
 C20 C 0.6252(4) 0.86013(17) 0.6421(3) 0.0238(8) Uani 1 1 d . . . . .
 H20 H 0.694791 0.878170 0.649449 0.029 Uiso 1 1 calc R U . . .
 C21 C 0.5297(4) 0.89455(18) 0.6234(3) 0.0281(8) Uani 1 1 d . . . . .
 H21 H 0.533879 0.935881 0.617026 0.034 Uiso 1 1 calc R U . . .
 C22 C 0.4280(4) 0.8688(2) 0.6139(4) 0.0308(9) Uani 1 1 d . . . . .
 H22 H 0.362188 0.892237 0.600586 0.037 Uiso 1 1 calc R U . . .
 C23 C 0.4235(4) 0.8083(2) 0.6241(4) 0.0290(9) Uani 1 1 d . . . . .
 H23 H 0.354426 0.790594 0.618801 0.035 Uiso 1 1 calc R U . . .
 C24 C 0.5181(3) 0.77338(18) 0.6418(3) 0.0246(8) Uani 1 1 d . . . . .
 H24 H 0.513658 0.732080 0.648342 0.030 Uiso 1 1 calc R U . . .
 C25 C 0.8505(4) 0.61241(17) 0.7043(3) 0.0259(8) Uani 1 1 d . . . . .
 C26 C 0.7597(3) 0.58350(16) 0.7030(3) 0.0212(7) Uani 1 1 d . . . . .
 H26 H 0.691026 0.603478 0.693006 0.025 Uiso 1 1 calc R U . . .
 C27 C 0.7691(4) 0.5249(2) 0.7165(4) 0.0319(9) Uani 1 1 d . . . . .
 H27 H 0.705051 0.503587 0.715318 0.038 Uiso 1 1 calc R U . . .
 C28 C 0.8679(4) 0.49452(19) 0.7318(4) 0.0317(9) Uani 1 1 d . . . . .
 H28 H 0.871129 0.453094 0.740073 0.038 Uiso 1 1 calc R U . . .
 C29 C 0.9614(4) 0.52519(19) 0.7350(4) 0.0341(10) Uani 1 1 d . . . . .
 H29 H 1.030800 0.505270 0.747181 0.041 Uiso 1 1 calc R U . . .
 O1W O 0.5406(19) 0.6205(10) 0.6839(19) 0.075(5) Uiso 0.25 1 d G . P . .
 H1WA H 0.489316 0.600356 0.631383 0.112 Uiso 0.25 1 d G U P . .
 H1WB H 0.549161 0.603557 0.745092 0.112 Uiso 0.25 1 d G U P . .
 F21 F 1.1379(8) 0.8609(4) 0.5001(9) 0.0268(19) Uani 0.25 1 d . U P B 2
 F19 F 1.1130(14) 0.7974(7) 0.6023(14) 0.049(4) Uani 0.25 1 d . U P B 2
 F20 F 1.0408(7) 0.7857(4) 0.4209(8) 0.0186(17) Uani 0.25 1 d . U P B 2
 F24 F 0.2110(9) 0.9093(5) 0.2479(10) 0.029(2) Uani 0.25 1 d . U P A 2
 F23 F 0.3280(9) 0.8976(4) 0.1816(9) 0.026(2) Uani 0.25 1 d . U P A 2
 F22 F 0.3934(10) 0.9228(5) 0.3621(9) 0.017(2) Uani 0.25 1 d . U P A 2

loop_
  _atom_site_aniso_label
  _atom_site_aniso_U_11
  _atom_site_aniso_U_22
  _atom_site_aniso_U_33
  _atom_site_aniso_U_23
  _atom_site_aniso_U_13
  _atom_site_aniso_U_12
 Ag1 0.02055(13) 0.01054(11) 0.02428(14) -0.00092(9) 0.01057(10) -0.00113(9)
 Ag2 0.02022(13) 0.01406(12) 0.02532(14) -0.00036(10) 0.01186(11) 0.00074(9)
 Ag3 0.01512(12) 0.01528(12) 0.02664(14) -0.00209(10) 0.00869(10) -0.00212(9)
 F1 0.0288(14) 0.0331(15) 0.106(3) -0.0336(17) 0.0331(17) -0.0143(11)
 F2 0.0343(15) 0.0586(19) 0.0573(19) 0.0098(15) 0.0288(14) 0.0000(13)
 F3 0.0250(12) 0.0330(14) 0.065(2) 0.0005(13) 0.0156(13) 0.0113(11)
 F4 0.0386(15) 0.0445(16) 0.0322(14) 0.0010(12) 0.0060(12) -0.0238(12)
 F5 0.0422(14) 0.0160(11) 0.0461(16) 0.0093(10) 0.0229(12) -0.0012(10)
 F6 0.0397(14) 0.0215(12) 0.0650(19) -0.0014(12) 0.0365(14) -0.0044(10)
 F7 0.059(2) 0.0200(13) 0.121(3) -0.0090(16) 0.058(2) -0.0115(13)
 F8 0.108(3) 0.074(3) 0.049(2) 0.0217(19) 0.016(2) -0.050(2)
 F9 0.0305(14) 0.0407(16) 0.088(3) -0.0008(16) 0.0341(16) -0.0122(12)
 F10 0.0425(18) 0.0390(18) 0.058(2) 0.0080(16) 0.0169(15) -0.0041(14)
 F11 0.0533(18) 0.0455(17) 0.0676(19) -0.0046(15) 0.0328(15) 0.0078(14)
 F12 0.082(2) 0.056(2) 0.060(2) 0.0050(16) 0.0196(16) 0.0057(17)
 F13 0.0235(12) 0.0262(13) 0.0598(18) -0.0058(12) 0.0061(12) 0.0076(10)
 F14 0.0421(15) 0.0112(10) 0.0652(19) 0.0005(11) 0.0309(14) -0.0020(10)
 F15 0.0530(17) 0.0259(13) 0.0472(16) -0.0056(11) 0.0330(14) 0.0018(11)
 F16 0.0333(15) 0.0422(16) 0.0677(19) -0.0055(14) 0.0161(13) -0.0028(13)
 F17 0.065(2) 0.079(2) 0.062(2) 0.0011(16) 0.0335(16) 0.0223(16)
 F18 0.028(2) 0.025(2) 0.070(3) 0.017(2) 0.015(2) 0.0109(16)
 N1 0.0168(13) 0.0126(13) 0.0214(15) -0.0007(11) 0.0079(12) 0.0006(10)
 N2 0.0186(14) 0.0126(13) 0.0212(15) -0.0003(11) 0.0089(12) -0.0013(10)
 N3 0.0197(14) 0.0157(14) 0.0241(16) -0.0018(12) 0.0116(12) -0.0034(11)
 N4 0.0179(14) 0.0154(13) 0.0198(15) -0.0021(11) 0.0086(12) -0.0014(11)
 N5 0.0161(13) 0.0135(13) 0.0234(15) -0.0015(11) 0.0076(12) -0.0010(10)
 N6 0.0158(13) 0.0122(13) 0.0229(15) -0.0013(11) 0.0082(12) 0.0001(10)
 C1 0.0181(16) 0.0136(15) 0.0274(19) -0.0035(13) 0.0075(14) 0.0010(12)
 C2 0.0215(17) 0.0137(16) 0.0267(19) -0.0004(14) 0.0061(15) 0.0011(13)
 C3 0.0243(17) 0.0134(15) 0.0184(17) 0.0008(12) 0.0089(14) -0.0008(13)
 C4 0.0206(18) 0.0173(17) 0.047(3) -0.0047(17) 0.0133(18) 0.0012(14)
 C5 0.0281(19) 0.0151(16) 0.028(2) 0.0020(14) 0.0130(16) -0.0024(14)
 C6 0.0188(16) 0.0228(18) 0.0245(18) -0.0034(14) 0.0117(14) -0.0054(13)
 C7 0.0182(16) 0.0265(19) 0.028(2) -0.0050(15) 0.0133(15) -0.0015(14)
 C8 0.0188(16) 0.0202(17) 0.0242(18) -0.0023(14) 0.0100(14) 0.0013(13)
 C9 0.028(2) 0.030(2) 0.042(3) 0.0020(19) 0.0162(19) -0.0077(17)
 C10 0.0221(18) 0.0227(19) 0.034(2) 0.0000(16) 0.0047(16) 0.0035(15)
 C11 0.0193(16) 0.0120(15) 0.0222(17) -0.0012(13) 0.0069(14) -0.0001(12)
 C12 0.0178(16) 0.0168(16) 0.0242(18) 0.0001(14) 0.0062(14) -0.0031(13)
 C13 0.0191(16) 0.0154(16) 0.0235(18) 0.0012(13) 0.0091(14) -0.0021(12)
 C14 0.0235(18) 0.0147(16) 0.039(2) -0.0033(15) 0.0165(17) -0.0025(13)
 C15 0.0228(19) 0.024(2) 0.041(2) 0.0050(17) 0.0157(18) 0.0021(15)
 O1 0.0345(16) 0.0302(16) 0.0399(18) 0.0026(14) 0.0163(14) 0.0003(13)
 N7 0.046(2) 0.039(2) 0.036(2) -0.0046(18) 0.0118(19) 0.0042(18)
 C16 0.033(2) 0.0254(19) 0.0203(19) -0.0018(15) 0.0085(16) 0.0016(16)
 C17 0.032(2) 0.027(2) 0.0219(19) 0.0015(15) 0.0098(16) 0.0039(16)
 C18 0.030(2) 0.0259(19) 0.0180(18) 0.0001(14) 0.0095(15) 0.0026(15)
 C19 0.0263(18) 0.0252(18) 0.0149(16) -0.0001(14) 0.0080(14) 0.0054(14)
 C20 0.0285(19) 0.0238(18) 0.0185(18) -0.0022(14) 0.0097(15) 0.0008(15)
 C21 0.039(2) 0.0209(18) 0.024(2) -0.0014(15) 0.0135(17) 0.0045(16)
 C22 0.031(2) 0.032(2) 0.028(2) -0.0013(17) 0.0117(17) 0.0118(17)
 C23 0.029(2) 0.036(2) 0.024(2) -0.0026(17) 0.0131(16) 0.0005(17)
 C24 0.0278(19) 0.0238(19) 0.0199(18) -0.0012(14) 0.0080(15) 0.0014(15)
 C25 0.035(2) 0.0209(18) 0.0156(17) 0.0005(14) 0.0057(15) 0.0007(15)
 C26 0.0233(17) 0.0228(17) 0.0156(16) 0.0028(13) 0.0066(14) 0.0080(14)
 C27 0.032(2) 0.034(2) 0.024(2) -0.0012(17) 0.0073(17) -0.0061(17)
 C28 0.039(2) 0.0221(19) 0.028(2) 0.0004(16) 0.0090(18) 0.0028(17)
 C29 0.033(2) 0.027(2) 0.032(2) -0.0048(17) 0.0048(18) 0.0044(17)
 F21 0.022(2) 0.024(3) 0.035(3) 0.0027(18) 0.0135(18) -0.0022(17)
 F19 0.049(4) 0.049(5) 0.049(4) 0.002(2) 0.021(3) 0.002(2)
 F20 0.017(2) 0.019(2) 0.021(2) -0.0066(17) 0.0084(17) 0.0033(17)
 F24 0.024(3) 0.026(3) 0.033(3) 0.0033(19) 0.0087(19) 0.0018(18)
 F23 0.033(3) 0.024(3) 0.024(3) 0.0040(18) 0.0152(19) -0.0006(18)
 F22 0.021(3) 0.013(3) 0.014(3) -0.0014(18) 0.0053(18) -0.0022(17)

_geom_special_details
;
 All esds (except the esd in the dihedral angle between two l.s. planes)
 are estimated using the full covariance matrix.  The cell esds are taken
 into account individually in the estimation of esds in distances, angles
 and torsion angles; correlations between esds in cell parameters are only
 used when they are defined by crystal symmetry.  An approximate (isotropic)
 treatment of cell esds is used for estimating esds involving l.s. planes.
;
loop_
  _geom_bond_atom_site_label_1
  _geom_bond_atom_site_label_2
  _geom_bond_distance
  _geom_bond_site_symmetry_2
  _geom_bond_publ_flag
 Ag1 N1 2.101(3) . ?
 Ag1 N6 2.100(3) . ?
 Ag2 N2 2.089(3) . ?
 Ag2 N3 2.091(3) . ?
 Ag3 N4 2.103(3) . ?
 Ag3 N5 2.104(3) . ?
 F1 C4 1.327(5) . ?
 F2 C4 1.348(6) . ?
 F3 C4 1.331(5) . ?
 F4 C5 1.330(5) . ?
 F5 C5 1.335(4) . ?
 F6 C5 1.341(5) . ?
 F7 C9 1.326(6) . ?
 F8 C9 1.323(6) . ?
 F9 C9 1.328(5) . ?
 F10 C10 1.294(6) . ?
 F11 C10 1.365(6) . ?
 F12 C10 1.285(7) . ?
 F13 C14 1.328(5) . ?
 F14 C14 1.338(4) . ?
 F15 C14 1.339(5) . ?
 F16 C15 1.364(6) . ?
 F17 C15 1.242(7) . ?
 F18 C15 1.339(6) . ?
 N1 N2 1.356(4) . ?
 N1 C1 1.339(4) . ?
 N2 C3 1.347(4) . ?
 N3 N4 1.357(4) . ?
 N3 C6 1.350(5) . ?
 N4 C8 1.342(5) . ?
 N5 N6 1.358(4) . ?
 N5 C11 1.343(4) . ?
 N6 C13 1.338(4) . ?
 C1 C2 1.384(5) . ?
 C1 C4 1.488(5) . ?
 C2 H2 0.9500 . ?
 C2 C3 1.379(5) . ?
 C3 C5 1.489(5) . ?
 C6 C7 1.377(5) . ?
 C6 C9 1.484(6) . ?
 C7 H7 0.9500 . ?
 C7 C8 1.386(5) . ?
 C8 C10 1.490(5) . ?
 C10 F24 1.275(11) . ?
 C10 F23 1.408(11) . ?
 C10 F22 1.383(11) . ?
 C11 C12 1.378(5) . ?
 C11 C14 1.490(5) . ?
 C12 H12 0.9500 . ?
 C12 C13 1.383(5) . ?
 C13 C15 1.487(5) . ?
 C15 F21 1.330(10) . ?
 C15 F19 1.213(17) . ?
 C15 F20 1.482(10) . ?
 O1 C16 1.238(5) . ?
 N7 C25 1.393(6) . ?
 N7 C29 1.380(6) . ?
 C16 C17 1.471(6) . ?
 C16 C25 1.502(6) . ?
 C17 H17 0.9500 . ?
 C17 C18 1.357(6) . ?
 C18 H18 0.9500 . ?
 C18 C19 1.459(5) . ?
 C19 C20 1.395(5) . ?
 C19 C24 1.401(6) . ?
 C20 H20 0.9500 . ?
 C20 C21 1.386(6) . ?
 C21 H21 0.9500 . ?
 C21 C22 1.389(6) . ?
 C22 H22 0.9500 . ?
 C22 C23 1.390(6) . ?
 C23 H23 0.9500 . ?
 C23 C24 1.386(6) . ?
 C24 H24 0.9500 . ?
 C25 C26 1.333(6) . ?
 C26 H26 0.9500 . ?
 C26 C27 1.346(6) . ?
 C27 H27 0.9500 . ?
 C27 C28 1.383(6) . ?
 C28 H28 0.9500 . ?
 C28 C29 1.376(7) . ?
 C29 H29 0.9500 . ?
 O1W H1WA 0.8501 . ?
 O1W H1WB 0.8506 . ?

loop_
  _geom_angle_atom_site_label_1
  _geom_angle_atom_site_label_2
  _geom_angle_atom_site_label_3
  _geom_angle
  _geom_angle_site_symmetry_1
  _geom_angle_site_symmetry_3
  _geom_angle_publ_flag
 N6 Ag1 N1 178.96(12) . . ?
 N2 Ag2 N3 175.68(12) . . ?
 N4 Ag3 N5 175.97(12) . . ?
 N2 N1 Ag1 120.0(2) . . ?
 C1 N1 Ag1 131.8(2) . . ?
 C1 N1 N2 107.9(3) . . ?
 N1 N2 Ag2 118.8(2) . . ?
 C3 N2 Ag2 133.4(2) . . ?
 C3 N2 N1 107.3(3) . . ?
 N4 N3 Ag2 120.6(2) . . ?
 C6 N3 Ag2 130.6(3) . . ?
 C6 N3 N4 107.4(3) . . ?
 N3 N4 Ag3 119.1(2) . . ?
 C8 N4 Ag3 132.3(2) . . ?
 C8 N4 N3 107.4(3) . . ?
 N6 N5 Ag3 119.5(2) . . ?
 C11 N5 Ag3 133.6(2) . . ?
 C11 N5 N6 106.8(3) . . ?
 N5 N6 Ag1 121.2(2) . . ?
 C13 N6 Ag1 130.7(2) . . ?
 C13 N6 N5 108.0(3) . . ?
 N1 C1 C2 110.7(3) . . ?
 N1 C1 C4 120.8(3) . . ?
 C2 C1 C4 128.4(3) . . ?
 C1 C2 H2 128.4 . . ?
 C3 C2 C1 103.3(3) . . ?
 C3 C2 H2 128.4 . . ?
 N2 C3 C2 110.9(3) . . ?
 N2 C3 C5 120.8(3) . . ?
 C2 C3 C5 128.3(3) . . ?
 F1 C4 F2 106.8(4) . . ?
 F1 C4 F3 107.9(3) . . ?
 F1 C4 C1 112.6(3) . . ?
 F2 C4 C1 111.6(3) . . ?
 F3 C4 F2 105.9(4) . . ?
 F3 C4 C1 111.6(4) . . ?
 F4 C5 F5 106.5(3) . . ?
 F4 C5 F6 106.7(3) . . ?
 F4 C5 C3 112.7(3) . . ?
 F5 C5 F6 107.2(3) . . ?
 F5 C5 C3 111.2(3) . . ?
 F6 C5 C3 112.2(3) . . ?
 N3 C6 C7 111.0(3) . . ?
 N3 C6 C9 119.6(4) . . ?
 C7 C6 C9 129.4(4) . . ?
 C6 C7 H7 128.5 . . ?
 C6 C7 C8 103.1(3) . . ?
 C8 C7 H7 128.5 . . ?
 N4 C8 C7 111.1(3) . . ?
 N4 C8 C10 120.5(3) . . ?
 C7 C8 C10 128.4(3) . . ?
 F7 C9 F9 106.6(4) . . ?
 F7 C9 C6 112.9(4) . . ?
 F8 C9 F7 105.7(4) . . ?
 F8 C9 F9 107.5(4) . . ?
 F8 C9 C6 112.2(4) . . ?
 F9 C9 C6 111.6(4) . . ?
 F10 C10 F11 105.8(4) . . ?
 F10 C10 C8 114.6(4) . . ?
 F11 C10 C8 109.0(4) . . ?
 F12 C10 F10 109.9(5) . . ?
 F12 C10 F11 103.8(5) . . ?
 F12 C10 C8 112.9(4) . . ?
 F24 C10 C8 118.1(6) . . ?
 F24 C10 F23 99.6(7) . . ?
 F24 C10 F22 110.4(7) . . ?
 F23 C10 C8 111.5(5) . . ?
 F22 C10 C8 111.4(6) . . ?
 F22 C10 F23 104.4(7) . . ?
 N5 C11 C12 111.4(3) . . ?
 N5 C11 C14 120.5(3) . . ?
 C12 C11 C14 127.9(3) . . ?
 C11 C12 H12 128.5 . . ?
 C11 C12 C13 103.0(3) . . ?
 C13 C12 H12 128.5 . . ?
 N6 C13 C12 110.8(3) . . ?
 N6 C13 C15 120.9(3) . . ?
 C12 C13 C15 128.3(3) . . ?
 F13 C14 F14 107.3(3) . . ?
 F13 C14 F15 106.4(3) . . ?
 F13 C14 C11 113.0(3) . . ?
 F14 C14 F15 106.5(3) . . ?
 F14 C14 C11 110.8(3) . . ?
 F15 C14 C11 112.3(3) . . ?
 F16 C15 C13 109.3(4) . . ?
 F17 C15 F16 108.9(5) . . ?
 F17 C15 F18 109.6(5) . . ?
 F17 C15 C13 113.8(4) . . ?
 F18 C15 F16 102.3(4) . . ?
 F18 C15 C13 112.3(4) . . ?
 F21 C15 C13 113.5(5) . . ?
 F21 C15 F20 97.0(7) . . ?
 F19 C15 C13 118.6(9) . . ?
 F19 C15 F21 110.1(9) . . ?
 F19 C15 F20 105.5(9) . . ?
 F20 C15 C13 109.6(5) . . ?
 C29 N7 C25 118.1(4) . . ?
 O1 C16 C17 122.7(4) . . ?
 O1 C16 C25 119.7(4) . . ?
 C17 C16 C25 117.6(4) . . ?
 C16 C17 H17 120.1 . . ?
 C18 C17 C16 119.7(4) . . ?
 C18 C17 H17 120.1 . . ?
 C17 C18 H18 116.6 . . ?
 C17 C18 C19 126.7(4) . . ?
 C19 C18 H18 116.6 . . ?
 C20 C19 C18 118.7(4) . . ?
 C20 C19 C24 119.0(4) . . ?
 C24 C19 C18 122.3(4) . . ?
 C19 C20 H20 119.6 . . ?
 C21 C20 C19 120.8(4) . . ?
 C21 C20 H20 119.6 . . ?
 C20 C21 H21 119.9 . . ?
 C20 C21 C22 120.2(4) . . ?
 C22 C21 H21 119.9 . . ?
 C21 C22 H22 120.4 . . ?
 C21 C22 C23 119.2(4) . . ?
 C23 C22 H22 120.4 . . ?
 C22 C23 H23 119.4 . . ?
 C24 C23 C22 121.2(4) . . ?
 C24 C23 H23 119.4 . . ?
 C19 C24 H24 120.2 . . ?
 C23 C24 C19 119.6(4) . . ?
 C23 C24 H24 120.2 . . ?
 N7 C25 C16 118.6(4) . . ?
 C26 C25 N7 123.4(4) . . ?
 C26 C25 C16 118.0(4) . . ?
 C25 C26 H26 121.3 . . ?
 C25 C26 C27 117.5(4) . . ?
 C27 C26 H26 121.3 . . ?
 C26 C27 H27 118.6 . . ?
 C26 C27 C28 122.8(4) . . ?
 C28 C27 H27 118.6 . . ?
 C27 C28 H28 120.5 . . ?
 C29 C28 C27 119.0(4) . . ?
 C29 C28 H28 120.5 . . ?
 N7 C29 H29 120.3 . . ?
 C28 C29 N7 119.3(4) . . ?
 C28 C29 H29 120.3 . . ?
 H1WA O1W H1WB 104.5 . . ?

loop_
  _geom_torsion_atom_site_label_1
  _geom_torsion_atom_site_label_2
  _geom_torsion_atom_site_label_3
  _geom_torsion_atom_site_label_4
  _geom_torsion
  _geom_torsion_site_symmetry_1
  _geom_torsion_site_symmetry_2
  _geom_torsion_site_symmetry_3
  _geom_torsion_site_symmetry_4
  _geom_torsion_publ_flag
 Ag1 N1 N2 Ag2 13.3(3) . . . . ?
 Ag1 N1 N2 C3 -174.5(2) . . . . ?
 Ag1 N1 C1 C2 173.8(3) . . . . ?
 Ag1 N1 C1 C4 -9.2(6) . . . . ?
 Ag1 N6 C13 C12 -175.0(3) . . . . ?
 Ag1 N6 C13 C15 5.6(6) . . . . ?
 Ag2 N2 C3 C2 170.6(3) . . . . ?
 Ag2 N2 C3 C5 -8.8(5) . . . . ?
 Ag2 N3 N4 Ag3 -21.9(4) . . . . ?
 Ag2 N3 N4 C8 168.6(2) . . . . ?
 Ag2 N3 C6 C7 -166.9(3) . . . . ?
 Ag2 N3 C6 C9 16.5(6) . . . . ?
 Ag3 N4 C8 C7 -168.0(3) . . . . ?
 Ag3 N4 C8 C10 13.4(6) . . . . ?
 Ag3 N5 N6 Ag1 -6.9(4) . . . . ?
 Ag3 N5 N6 C13 177.9(2) . . . . ?
 Ag3 N5 C11 C12 -177.3(3) . . . . ?
 Ag3 N5 C11 C14 6.5(6) . . . . ?
 N1 N2 C3 C2 -0.1(4) . . . . ?
 N1 N2 C3 C5 -179.5(3) . . . . ?
 N1 C1 C2 C3 -0.5(4) . . . . ?
 N1 C1 C4 F1 32.9(6) . . . . ?
 N1 C1 C4 F2 -87.2(5) . . . . ?
 N1 C1 C4 F3 154.5(4) . . . . ?
 N2 N1 C1 C2 0.4(4) . . . . ?
 N2 N1 C1 C4 177.5(3) . . . . ?
 N2 C3 C5 F4 92.6(4) . . . . ?
 N2 C3 C5 F5 -147.9(3) . . . . ?
 N2 C3 C5 F6 -27.9(5) . . . . ?
 N3 N4 C8 C7 -0.5(4) . . . . ?
 N3 N4 C8 C10 -179.0(3) . . . . ?
 N3 C6 C7 C8 0.2(4) . . . . ?
 N3 C6 C9 F7 -49.8(6) . . . . ?
 N3 C6 C9 F8 69.5(6) . . . . ?
 N3 C6 C9 F9 -169.8(4) . . . . ?
 N4 N3 C6 C7 -0.5(4) . . . . ?
 N4 N3 C6 C9 -177.1(4) . . . . ?
 N4 C8 C10 F10 -27.0(6) . . . . ?
 N4 C8 C10 F11 -145.4(4) . . . . ?
 N4 C8 C10 F12 99.8(5) . . . . ?
 N4 C8 C10 F24 -179.3(7) . . . . ?
 N4 C8 C10 F23 66.2(7) . . . . ?
 N4 C8 C10 F22 -50.0(7) . . . . ?
 N5 N6 C13 C12 -0.4(4) . . . . ?
 N5 N6 C13 C15 -179.9(3) . . . . ?
 N5 C11 C12 C13 0.3(4) . . . . ?
 N5 C11 C14 F13 -36.2(5) . . . . ?
 N5 C11 C14 F14 -156.7(4) . . . . ?
 N5 C11 C14 F15 84.3(4) . . . . ?
 N6 N5 C11 C12 -0.6(4) . . . . ?
 N6 N5 C11 C14 -176.8(3) . . . . ?
 N6 C13 C15 F16 -159.8(4) . . . . ?
 N6 C13 C15 F17 78.2(6) . . . . ?
 N6 C13 C15 F18 -47.1(6) . . . . ?
 N6 C13 C15 F21 151.9(6) . . . . ?
 N6 C13 C15 F19 -76.5(10) . . . . ?
 N6 C13 C15 F20 44.7(6) . . . . ?
 C1 N1 N2 Ag2 -172.5(2) . . . . ?
 C1 N1 N2 C3 -0.2(4) . . . . ?
 C1 C2 C3 N2 0.3(4) . . . . ?
 C1 C2 C3 C5 179.7(4) . . . . ?
 C2 C1 C4 F1 -150.6(4) . . . . ?
 C2 C1 C4 F2 89.3(5) . . . . ?
 C2 C1 C4 F3 -29.0(6) . . . . ?
 C2 C3 C5 F4 -86.7(5) . . . . ?
 C2 C3 C5 F5 32.8(6) . . . . ?
 C2 C3 C5 F6 152.8(4) . . . . ?
 C4 C1 C2 C3 -177.3(4) . . . . ?
 C6 N3 N4 Ag3 170.1(2) . . . . ?
 C6 N3 N4 C8 0.6(4) . . . . ?
 C6 C7 C8 N4 0.1(4) . . . . ?
 C6 C7 C8 C10 178.6(4) . . . . ?
 C7 C6 C9 F7 134.3(5) . . . . ?
 C7 C6 C9 F8 -106.4(5) . . . . ?
 C7 C6 C9 F9 14.3(7) . . . . ?
 C7 C8 C10 F10 154.7(5) . . . . ?
 C7 C8 C10 F11 36.3(6) . . . . ?
 C7 C8 C10 F12 -78.5(6) . . . . ?
 C7 C8 C10 F24 2.4(9) . . . . ?
 C7 C8 C10 F23 -112.1(7) . . . . ?
 C7 C8 C10 F22 131.7(7) . . . . ?
 C9 C6 C7 C8 176.4(4) . . . . ?
 C11 N5 N6 Ag1 175.8(2) . . . . ?
 C11 N5 N6 C13 0.6(4) . . . . ?
 C11 C12 C13 N6 0.0(4) . . . . ?
 C11 C12 C13 C15 179.5(4) . . . . ?
 C12 C11 C14 F13 148.3(4) . . . . ?
 C12 C11 C14 F14 27.8(6) . . . . ?
 C12 C11 C14 F15 -91.2(5) . . . . ?
 C12 C13 C15 F16 20.8(6) . . . . ?
 C12 C13 C15 F17 -101.2(6) . . . . ?
 C12 C13 C15 F18 133.6(5) . . . . ?
 C12 C13 C15 F21 -27.5(8) . . . . ?
 C12 C13 C15 F19 104.1(10) . . . . ?
 C12 C13 C15 F20 -134.7(6) . . . . ?
 C14 C11 C12 C13 176.2(4) . . . . ?
 O1 C16 C17 C18 -6.3(6) . . . . ?
 O1 C16 C25 N7 3.4(6) . . . . ?
 O1 C16 C25 C26 -175.8(4) . . . . ?
 N7 C25 C26 C27 -1.0(6) . . . . ?
 C16 C17 C18 C19 179.1(4) . . . . ?
 C16 C25 C26 C27 178.2(4) . . . . ?
 C17 C16 C25 N7 -178.0(4) . . . . ?
 C17 C16 C25 C26 2.8(5) . . . . ?
 C17 C18 C19 C20 -179.3(4) . . . . ?
 C17 C18 C19 C24 -0.6(6) . . . . ?
 C18 C19 C20 C21 177.3(4) . . . . ?
 C18 C19 C24 C23 -177.8(4) . . . . ?
 C19 C20 C21 C22 0.8(6) . . . . ?
 C20 C19 C24 C23 1.0(6) . . . . ?
 C20 C21 C22 C23 0.4(6) . . . . ?
 C21 C22 C23 C24 -1.0(6) . . . . ?
 C22 C23 C24 C19 0.2(6) . . . . ?
 C24 C19 C20 C21 -1.5(6) . . . . ?
 C25 N7 C29 C28 0.8(7) . . . . ?
 C25 C16 C17 C18 175.1(4) . . . . ?
 C25 C26 C27 C28 0.4(6) . . . . ?
 C26 C27 C28 C29 0.8(7) . . . . ?
 C27 C28 C29 N7 -1.4(7) . . . . ?
 C29 N7 C25 C16 -178.8(4) . . . . ?
 C29 N7 C25 C26 0.4(6) . . . . ?

_shelx_res_file
;
TITL a_a.res in P2(1)/c
    a.res
    created by SHELXL-2018/3 at 14:18:28 on 30-Mar-2023
REM Old TITL a in P2(1)/c
REM SHELXT solution in P2(1)/c
REM R1 0.122, Rweak 0.005, Alpha 0.038, Orientation as input
REM Formula found by SHELXT: C31 N9 F15 Ag3
CELL 0.71073 12.8452 22.8123 13.0509 90 115.75 90
ZERR 4 0.0005 0.0008 0.0005 0 0.002 0
LATT 1
SYMM -X,0.5+Y,0.5-Z
SFAC C H Ag F N O
UNIT 116 58 12 72 28 5
ISOR 0.001 0.002 F22 F23 F24
ISOR 0.05 0.1 F10 F12 F11
ISOR 0.001 0.002 F10 F11 F12
ISOR 0.001 0.002 F19 F17 F16
ISOR 0.001 0.002 F20 F21 F19

L.S. 20
PLAN  40
SIZE 0.24 0.17 0.11
TEMP -173.15
CONF
BOND $H
list 4
MORE -1
fmap 2
acta
OMIT 0 2 0
OMIT 1 0 0
OMIT -5 10 2
OMIT -3 1 1
OMIT -5 5 5
REM <olex2.extras>
REM <HklSrc "%.\\a.hkl">
REM </olex2.extras>

WGHT    0.034100   11.862201
FVAR       0.09538
AG1   3    0.821974    0.736335    0.442105    11.00000    0.02055    0.01054 =
         0.02428   -0.00092    0.01057   -0.00113
AG2   3    0.556493    0.683138    0.402023    11.00000    0.02022    0.01406 =
         0.02532   -0.00036    0.01186    0.00074
AG3   3    0.599763    0.835158    0.399883    11.00000    0.01512    0.01528 =
         0.02664   -0.00209    0.00869   -0.00212
F1    4    1.018652    0.657512    0.469606    11.00000    0.02876    0.03310 =
         0.10551   -0.03360    0.03305   -0.01428
F2    4    0.951047    0.616166    0.305526    11.00000    0.03426    0.05857 =
         0.05729    0.00978    0.02881    0.00000
F3    4    1.034749    0.564369    0.455956    11.00000    0.02496    0.03301 =
         0.06483    0.00048    0.01558    0.01127
F4    4    0.519986    0.515926    0.304399    11.00000    0.03862    0.04450 =
         0.03216    0.00098    0.00597   -0.02383
F5    4    0.634713    0.477380    0.462466    11.00000    0.04225    0.01599 =
         0.04611    0.00935    0.02293   -0.00118
F6    4    0.536924    0.554379    0.460689    11.00000    0.03971    0.02148 =
         0.06501   -0.00144    0.03645   -0.00438
F7    4    0.310462    0.631534    0.328814    11.00000    0.05886    0.01995 =
         0.12105   -0.00900    0.05756   -0.01147
F8    4    0.315104    0.664027    0.482261    11.00000    0.10806    0.07426 =
         0.04930    0.02174    0.01596   -0.05000
F9    4    0.159849    0.670874    0.327919    11.00000    0.03047    0.04074 =
         0.08840   -0.00081    0.03407   -0.01224
PART 1
F10   4    0.403117    0.919856    0.328949    10.75000    0.04246    0.03901 =
         0.05764    0.00796    0.01686   -0.00406
F11   4    0.231251    0.911073    0.310143    10.75000    0.05327    0.04550 =
         0.06755   -0.00459    0.03276    0.00777
F12   4    0.267711    0.894773    0.171787    10.75000    0.08152    0.05557 =
         0.06037    0.00498    0.01960    0.00568
PART 0
F13   4    0.643536    0.969041    0.408834    11.00000    0.02353    0.02618 =
         0.05983   -0.00584    0.00613    0.00764
F14   4    0.799984    1.019767    0.474059    11.00000    0.04211    0.01118 =
         0.06525    0.00054    0.03092   -0.00197
F15   4    0.747198    0.974935    0.588241    11.00000    0.05298    0.02592 =
         0.04724   -0.00559    0.03300    0.00178
PART 1
F16   4    1.154954    0.860065    0.584862    10.75000    0.03326    0.04221 =
         0.06773   -0.00549    0.01613   -0.00283
F17   4    1.071120    0.815634    0.427132    10.75000    0.06499    0.07920 =
         0.06159    0.00114    0.03353    0.02225
F18   4    1.080233    0.777153    0.577821    10.75000    0.02795    0.02466 =
         0.07044    0.01737    0.01525    0.01086
PART 0
N1    5    0.787016    0.646044    0.420168    11.00000    0.01682    0.01255 =
         0.02137   -0.00075    0.00785    0.00063
N2    5    0.687865    0.624553    0.418478    11.00000    0.01865    0.01264 =
         0.02121   -0.00025    0.00888   -0.00126
N3    5    0.422806    0.742699    0.372798    11.00000    0.01974    0.01574 =
         0.02411   -0.00184    0.01158   -0.00339
N4    5    0.433595    0.799774    0.349775    11.00000    0.01787    0.01542 =
         0.01982   -0.00209    0.00858   -0.00140
N5    5    0.770723    0.865098    0.456522    11.00000    0.01611    0.01346 =
         0.02342   -0.00153    0.00760   -0.00103
N6    5    0.855120    0.826665    0.465718    11.00000    0.01578    0.01223 =
         0.02287   -0.00130    0.00824    0.00006
C1    1    0.851365    0.600506    0.417063    11.00000    0.01807    0.01365 =
         0.02744   -0.00351    0.00746    0.00098
C2    1    0.795104    0.548109    0.412419    11.00000    0.02149    0.01371 =
         0.02669   -0.00041    0.00614    0.00115
AFIX  43
H2    2    0.820633    0.509386    0.409019    11.00000   -1.20000
AFIX   0
C3    1    0.693083    0.565691    0.413920    11.00000    0.02427    0.01336 =
         0.01843    0.00081    0.00888   -0.00081
C4    1    0.964265    0.609926    0.413195    11.00000    0.02063    0.01729 =
         0.04737   -0.00474    0.01330    0.00121
C5    1    0.596093    0.528546    0.410022    11.00000    0.02812    0.01511 =
         0.02797    0.00205    0.01303   -0.00237
C6    1    0.310953    0.733559    0.349626    11.00000    0.01885    0.02276 =
         0.02448   -0.00343    0.01166   -0.00542
C7    1    0.247513    0.784312    0.312238    11.00000    0.01820    0.02649 =
         0.02847   -0.00496    0.01333   -0.00151
AFIX  43
H7    2    0.167459    0.790218    0.290484    11.00000   -1.20000
AFIX   0
C8    1    0.328967    0.824654    0.314102    11.00000    0.01884    0.02016 =
         0.02420   -0.00225    0.00995    0.00134
C9    1    0.274220    0.675217    0.372184    11.00000    0.02804    0.03039 =
         0.04166    0.00200    0.01621   -0.00769
C10   1    0.311797    0.887550    0.280140    11.00000    0.02213    0.02269 =
         0.03429    0.00003    0.00466    0.00347
C11   1    0.820435    0.918164    0.483853    11.00000    0.01935    0.01204 =
         0.02218   -0.00123    0.00689   -0.00006
C12   1    0.936873    0.915401    0.512076    11.00000    0.01775    0.01684 =
         0.02417    0.00008    0.00621   -0.00306
AFIX  43
H12   2    0.991843    0.946334    0.534811    11.00000   -1.20000
AFIX   0
C13   1    0.954077    0.856558    0.499186    11.00000    0.01905    0.01543 =
         0.02352    0.00122    0.00907   -0.00206
C14   1    0.752163    0.970139    0.488194    11.00000    0.02354    0.01473 =
         0.03914   -0.00335    0.01648   -0.00254
C15   1    1.063191    0.826401    0.516725    11.00000    0.02282    0.02396 =
         0.04147    0.00504    0.01568    0.00211

O1    6    0.920090    0.705270    0.680085    11.00000    0.03445    0.03019 =
         0.03994    0.00257    0.01626    0.00034
N7    5    0.953526    0.585189    0.720368    11.00000    0.04575    0.03913 =
         0.03571   -0.00459    0.01182    0.00416
C16   1    0.839985    0.677549    0.685996    11.00000    0.03334    0.02538 =
         0.02027   -0.00183    0.00848    0.00163
C17   1    0.731797    0.705568    0.673055    11.00000    0.03166    0.02732 =
         0.02186    0.00155    0.00980    0.00389
AFIX  43
H17   2    0.669378    0.682305    0.670518    11.00000   -1.20000
AFIX   0
C18   1    0.721546    0.764792    0.664758    11.00000    0.02982    0.02595 =
         0.01795    0.00011    0.00954    0.00264
AFIX  43
H18   2    0.786960    0.785952    0.668899    11.00000   -1.20000
AFIX   0
C19   1    0.620375    0.799319    0.650129    11.00000    0.02629    0.02524 =
         0.01488   -0.00008    0.00797    0.00541
C20   1    0.625215    0.860129    0.642054    11.00000    0.02849    0.02382 =
         0.01850   -0.00218    0.00966    0.00084
AFIX  43
H20   2    0.694791    0.878170    0.649449    11.00000   -1.20000
AFIX   0
C21   1    0.529714    0.894551    0.623366    11.00000    0.03914    0.02087 =
         0.02415   -0.00139    0.01352    0.00451
AFIX  43
H21   2    0.533879    0.935881    0.617026    11.00000   -1.20000
AFIX   0
C22   1    0.427962    0.868796    0.613885    11.00000    0.03120    0.03235 =
         0.02775   -0.00131    0.01168    0.01176
AFIX  43
H22   2    0.362188    0.892237    0.600586    11.00000   -1.20000
AFIX   0
C23   1    0.423518    0.808306    0.624087    11.00000    0.02868    0.03573 =
         0.02438   -0.00257    0.01308    0.00050
AFIX  43
H23   2    0.354426    0.790594    0.618801    11.00000   -1.20000
AFIX   0
C24   1    0.518111    0.773383    0.641834    11.00000    0.02780    0.02378 =
         0.01985   -0.00123    0.00804    0.00144
AFIX  43
H24   2    0.513658    0.732080    0.648342    11.00000   -1.20000
AFIX   0
C25   1    0.850480    0.612407    0.704313    11.00000    0.03547    0.02092 =
         0.01555    0.00046    0.00574    0.00065
C26   1    0.759689    0.583501    0.703022    11.00000    0.02331    0.02279 =
         0.01555    0.00284    0.00663    0.00797
AFIX  43
H26   2    0.691026    0.603478    0.693006    11.00000   -1.20000
AFIX   0
C27   1    0.769050    0.524929    0.716454    11.00000    0.03247    0.03421 =
         0.02371   -0.00120    0.00731   -0.00612
AFIX  43
H27   2    0.705051    0.503587    0.715318    11.00000   -1.20000
AFIX   0
C28   1    0.867887    0.494521    0.731834    11.00000    0.03923    0.02206 =
         0.02795    0.00041    0.00904    0.00278
AFIX  43
H28   2    0.871129    0.453094    0.740073    11.00000   -1.20000
AFIX   0
C29   1    0.961450    0.525195    0.735019    11.00000    0.03341    0.02728 =
         0.03166   -0.00483    0.00482    0.00437
AFIX  43
H29   2    1.030800    0.505270    0.747181    11.00000   -1.20000
AFIX   6
O1W   6    0.540610    0.620509    0.683884    10.25000    0.07490
H1WA  2    0.489316    0.600356    0.631383    10.25000   -1.50000
H1WB  2    0.549161    0.603557    0.745092    10.25000   -1.50000
AFIX   0

PART 2
F21   4    1.137895    0.860948    0.500103    10.25000    0.02213    0.02414 =
         0.03515    0.00267    0.01348   -0.00220
F19   4    1.113035    0.797435    0.602272    10.25000    0.04894    0.04944 =
         0.04873    0.00156    0.02063    0.00225
F20   4    1.040837    0.785734    0.420896    10.25000    0.01662    0.01886 =
         0.02072   -0.00662    0.00838    0.00332
F24   4    0.211012    0.909307    0.247929    10.25000    0.02359    0.02580 =
         0.03306    0.00330    0.00869    0.00183
F23   4    0.328033    0.897598    0.181642    10.25000    0.03267    0.02364 =
         0.02425    0.00404    0.01524   -0.00060
F22   4    0.393420    0.922762    0.362078    10.25000    0.02111    0.01250 =
         0.01387   -0.00141    0.00533   -0.00221
HKLF 4


REM  a_a.res in P2(1)/c
REM wR2 = 0.095583, GooF = S = 1.03199, Restrained GooF = 1.06967 for all data
REM R1 = 0.038822 for 8001 Fo > 4sig(Fo) and 0.051217 for all 9692 data
REM 584 parameters refined using 66 restraints

END

WGHT      0.0341     11.8616

REM Highest difference peak  1.774,  deepest hole -0.988,  1-sigma level  0.136
Q1    1   0.2132  0.8944  0.1843  11.00000  0.05    1.77
Q2    1   1.1097  0.8493  0.4451  11.00000  0.05    1.74
Q3    1   0.3862  0.8989  0.2202  11.00000  0.05    1.57
Q4    1   0.2633  0.9098  0.3621  11.00000  0.05    1.24
Q5    1   0.5885  0.8380  0.3368  11.00000  0.05    1.06
Q6    1   0.3223  0.9216  0.3506  11.00000  0.05    1.05
Q7    1   1.0488  0.7726  0.4732  11.00000  0.05    0.91
Q8    1   1.0175  0.6101  0.7232  11.00000  0.05    0.87
Q9    1   0.8100  0.7346  0.5067  11.00000  0.05    0.75
Q10   1   1.1502  0.8281  0.6252  11.00000  0.05    0.70
Q11   1   0.5683  0.6803  0.3388  11.00000  0.05    0.69
Q12   1   0.4868  0.6817  0.3689  11.00000  0.05    0.66
Q13   1   0.7899  0.9419  0.4748  11.00000  0.05    0.63
Q14   1   0.5434  0.6808  0.4657  11.00000  0.05    0.61
Q15   1   0.2511  0.6389  0.2717  11.00000  0.05    0.59
Q16   1   0.8981  0.7326  0.4787  11.00000  0.05    0.59
Q17   1   0.6624  0.8316  0.4313  11.00000  0.05    0.58
Q18   1   0.7498  0.7384  0.4225  11.00000  0.05    0.56
Q19   1   0.5937  0.8405  0.4732  11.00000  0.05    0.56
Q20   1   0.8278  0.7355  0.3770  11.00000  0.05    0.54
Q21   1   0.3208  0.8509  0.3027  11.00000  0.05    0.49
Q22   1   0.5266  0.8304  0.3715  11.00000  0.05    0.46
Q23   1   0.8472  0.6379  0.6788  11.00000  0.05    0.46
Q24   1   0.9123  0.6037  0.4327  11.00000  0.05    0.45
Q25   1   0.8513  0.5630  0.4514  11.00000  0.05    0.45
Q26   1   0.6134  0.6600  0.6584  11.00000  0.05    0.45
Q27   1   0.6097  0.8284  0.6437  11.00000  0.05    0.44
Q28   1   0.5766  0.7843  0.6518  11.00000  0.05    0.44
Q29   1   0.7864  0.6980  0.6607  11.00000  0.05    0.44
Q30   1   1.0125  0.8410  0.5256  11.00000  0.05    0.44
Q31   1   0.6949  0.8900  0.3729  11.00000  0.05    0.44
Q32   1   0.3029  0.6389  0.3702  11.00000  0.05    0.44
Q33   1   0.4710  0.7218  0.3461  11.00000  0.05    0.43
Q34   1   0.4334  0.8379  0.6154  11.00000  0.05    0.43
Q35   1   0.7520  0.5509  0.4508  11.00000  0.05    0.43
Q36   1   0.8790  0.9196  0.4894  11.00000  0.05    0.43
Q37   1   0.8268  0.7386  0.3149  11.00000  0.05    0.42
Q38   1   0.6892  0.8602  0.4297  11.00000  0.05    0.42
Q39   1   0.9461  1.0118  0.5293  11.00000  0.05    0.41
Q40   1   0.4721  0.7896  0.6262  11.00000  0.05    0.39
;
_shelx_res_checksum                73732
_shelx_hkl_file
;
   1   0   0    0.10    0.10
   2   0   0    8.20    0.80
   2   0   0    6.60    0.70
  -2   0   0    8.40    0.70
  -2   0   0    7.00    0.70
   2   0   0    6.50    0.60
  -2   0   0    6.20    0.60
  -3   0   0  120.09    6.00
   3   0   0  112.39    6.00
   3   0   0  122.89    5.90
  -3   0   0  119.39    5.80
   3   0   0  120.19    6.10
  -4   0   0   22.40    1.50
   4   0   0   22.00    1.70
  -4   0   0   22.20    1.90
   4   0   0   21.40    1.70
   4   0   0   21.70    1.50
  -4   0   0   22.30    1.60
  -5   0   0  787.42   35.30
  -5   0   0  747.53   35.00
   5   0   0  766.62   35.60
  -5   0   0  726.03   35.40
   5   0   0  749.53   35.10
   5   0   0  748.03   35.20
   6   0   0   27.20    2.10
   6   0   0   28.50    2.40
   6   0   0   27.90    2.00
  -6   0   0   26.00    1.90
   7   0   0  113.79    6.70
   7   0   0  117.29    6.30
   8   0   0  330.17   16.10
   8   0   0  327.07   16.80
   9   0   0   92.49    6.20
   9   0   0  100.49    5.70
  10   0   0    6.30    1.60
  10   0   0   11.00    2.10
  11   0   0    0.70    1.00
  11   0   0    1.50    1.10
  12   0   0    3.70    1.70
  12   0   0    5.00    1.50
  13   0   0    3.50    1.40
  13   0   0    4.80    1.50
  13   0   0    5.10    1.90
  14   0   0   48.60    3.90
  14   0   0   45.10    4.80
  14   0   0   52.29    4.00
  15   0   0    0.30    1.50
  15   0   0    1.10    1.50
  15   0   0   -1.50    1.10
  16   0   0    3.00    1.90
  16   0   0    3.40    1.70
  16   0   0    1.70    1.60
   1  -1   0  662.13   30.10
   1   1   0  681.13   30.20
   1   1   0  625.34   30.10
   2  -1   0    1.60    0.50
  -2  -1   0    0.80    0.30
   2  -1   0    0.70    0.30
  -2  -1   0    0.70    0.30
  -2  -1   0    1.70    0.40
  -2   1   0    1.30    0.30
   2   1   0    1.10    0.40
  -2   1   0    1.30    0.40
   2   1   0    1.40    0.40
   2   1   0    0.70    0.30
  -2   1   0    1.20    0.40
  -3  -1   0  280.57   12.20
  -3  -1   0  247.68   12.30
  -3  -1   0  238.38   12.10
   3  -1   0  263.57   12.40
   3  -1   0  245.68   12.30
   3   1   0  249.28   12.20
   3   1   0  233.48   12.20
  -3   1   0  278.37   12.30
  -3   1   0  265.17   12.10
   3   1   0  266.77   12.40
  -3   1   0  258.57   12.40
   4  -1   0 1181.08   59.49
  -4  -1   0 1223.58   59.29
  -4  -1   0 1318.97   59.69
   4  -1   0 1314.67   59.69
  -4  -1   0 1366.76   59.49
  -4   1   0 1320.57   59.29
   4   1   0 1254.37   59.39
   4   1   0 1214.58   59.39
  -4   1   0 1391.36   59.79
   4   1   0 1315.27   59.69
  -5  -1   0   14.90    1.40
   5  -1   0   18.50    1.60
   5  -1   0   14.40    1.50
  -5  -1   0   15.80    1.50
  -5  -1   0   14.30    1.30
   5   1   0   17.80    1.60
  -5   1   0   15.80    1.50
   5   1   0   15.40    1.30
  -5   1   0   17.20    1.50
   5   1   0   20.00    1.60
   6  -1   0   34.30    2.60
   6  -1   0   34.90    2.50
  -6  -1   0   31.40    2.40
  -6   1   0   34.60    2.20
   6   1   0   31.50    2.30
   6   1   0   38.00    3.00
   7  -1   0   42.50    2.80
   7  -1   0   35.30    2.90
   7   1   0   35.70    2.60
   7   1   0   39.70    3.00
   7   1   0   32.80    2.50
   8  -1   0   45.00    3.10
   8  -1   0   43.50    3.50
   8   1   0   42.20    3.40
   8   1   0   38.90    2.90
   9  -1   0   20.00    2.10
   9  -1   0   20.30    2.40
   9   1   0   22.10    2.20
   9   1   0   25.40    2.60
  10  -1   0   79.09    5.70
  10  -1   0   81.39    5.10
  10   1   0   86.19    5.00
  10   1   0   70.99    5.50
  11  -1   0    0.00    0.90
  11  -1   0    1.90    1.10
  11   1   0    0.40    1.00
  11   1   0   -0.40    0.90
  12  -1   0    5.10    1.50
  12  -1   0    6.20    2.00
  12   1   0    5.40    1.70
  12   1   0    5.00    1.40
  12   1   0    5.90    2.10
  13  -1   0    9.00    2.00
  13  -1   0    9.00    2.10
  13   1   0    9.40    1.60
  13   1   0    9.40    1.70
  13   1   0   13.00    2.70
  14  -1   0    2.10    1.70
  14  -1   0    0.40    1.20
  14  -1   0    0.90    1.20
  14   1   0    1.30    1.50
  14   1   0    0.10    1.00
  14   1   0    0.60    1.10
  15  -1   0   34.60    3.30
  15  -1   0   46.50    3.90
  15  -1   0   46.50    4.60
  15   1   0   42.80    3.80
  15   1   0   39.90    3.60
  15   1   0   35.20    4.10
  16  -1   0   -0.80    1.50
  16  -1   0    3.80    1.70
  16  -1   0    2.70    1.70
  16   1   0    4.10    1.70
  16   1   0   -1.30    1.30
  16   1   0    0.20    1.60
   0   2   0    0.10    0.10
   1  -2   0   55.19    2.90
   1  -2   0   62.49    2.90
  -1  -2   0   55.99    2.90
  -1  -2   0   55.19    2.80
  -1  -2   0   60.09    2.90
   1   2   0   53.69    2.70
  -1   2   0   65.39    2.90
  -1   2   0   58.19    2.90
   1   2   0   54.19    2.90
   1   2   0   53.19    2.80
   1   2   0   57.59    2.90
  -2  -2   0   18.60    1.10
   2  -2   0   18.30    1.30
   2  -2   0   20.00    1.30
   2  -2   0   21.40    1.30
  -2  -2   0   19.60    1.30
  -2  -2   0   18.90    1.20
  -2   2   0   20.10    1.30
   2   2   0   18.20    1.20
  -2   2   0   21.00    1.40
   2   2   0   19.10    1.20
   2   2   0   18.80    1.30
   2   2   0   19.80    1.30
  -3  -2   0  222.28   10.60
  -3  -2   0  218.28   10.40
   3  -2   0  217.88   10.50
   3  -2   0  223.38   10.70
   3  -2   0  223.28   10.60
  -3  -2   0  214.48   10.40
   3   2   0  218.38   10.40
   3   2   0  219.08   10.40
   3   2   0  206.78   10.60
  -3   2   0  218.28   10.30
  -3   2   0  211.78   10.60
  -3   2   0  229.68   10.70
   4  -2   0  191.68    8.70
  -4  -2   0  174.88    8.50
   4  -2   0  180.38    8.70
   4  -2   0  177.08    8.90
  -4  -2   0  175.08    8.80
  -4   2   0  183.48    8.80
  -4   2   0  167.38    8.40
   4   2   0  170.18    8.80
   4   2   0  160.98    8.50
  -4   2   0  174.48    8.80
   4   2   0  162.28    8.50
  -5  -2   0   74.39    4.20
   5  -2   0   89.79    4.80
   5  -2   0   77.69    4.50
   5  -2   0   85.19    4.60
  -5  -2   0   75.59    4.60
   5   2   0   85.39    4.40
   5   2   0   74.29    4.60
  -5   2   0   81.09    4.60
   5   2   0   71.09    4.30
  -5   2   0   79.19    4.10
  -5   2   0   78.29    4.50
  -6  -2   0    4.40    0.90
   6  -2   0    4.30    1.00
   6  -2   0    4.00    1.00
   6  -2   0    5.30    1.10
   6   2   0    4.00    0.90
  -6   2   0    5.20    0.80
   6   2   0    4.80    0.90
   7  -2   0  219.98   10.30
   7  -2   0  213.88   10.80
   7  -2   0  205.58   10.50
   7   2   0  189.98   10.60
   7   2   0  198.48   10.10
   7   2   0  173.78    9.90
   8  -2   0  286.07   14.90
   8  -2   0  282.57   14.30
   8   2   0  302.47   14.30
   8   2   0  274.57   14.80
   9  -2   0   30.50    3.10
   9  -2   0   34.20    2.70
   9   2   0   34.50    2.60
   9   2   0   32.50    3.10
  10  -2   0    5.10    1.60
  10  -2   0    2.30    1.00
  10   2   0    2.20    1.00
  10   2   0    1.40    0.90
  11  -2   0   64.99    4.10
  11  -2   0   49.20    4.40
  11   2   0   48.40    3.60
  11   2   0   49.10    3.70
  11   2   0   49.30    4.40
  12  -2   0   44.10    3.50
  12  -2   0   39.40    4.00
  12   2   0   36.90    4.00
  12   2   0   40.00    3.30
  12   2   0   41.10    3.20
  13  -2   0    0.80    1.10
  13  -2   0    0.10    1.30
  13   2   0    0.50    1.10
  13   2   0    0.60    1.20
  13   2   0   -0.20    1.00
  14  -2   0   13.50    2.90
  14  -2   0   18.50    2.60
  14   2   0   14.00    2.20
  14   2   0   13.60    2.70
  15  -2   0    2.70    1.60
  15  -2   0    1.60    1.60
  15  -2   0    1.10    1.30
  15   2   0    3.80    1.50
  15   2   0    2.00    1.60
  15   2   0    0.90    1.50
  16  -2   0    2.70    1.80
  16  -2   0    7.40    2.20
  16   2   0    4.10    2.00
  16   2   0    7.60    1.90
  16   2   0    5.50    2.20
   0  -3   0    0.20    0.20
   0  -3   0    0.00    0.10
   0  -3   0   -0.10    0.10
   0   3   0    0.00    0.10
   0   3   0    0.10    0.20
   0   3   0    0.20    0.10
  -1  -3   0   26.00    1.50
   1  -3   0   26.80    1.40
  -1  -3   0   22.70    1.50
   1  -3   0   21.80    1.50
  -1  -3   0   21.10    1.30
   1  -3   0   23.70    1.30
  -1   3   0   26.80    1.40
   1   3   0   23.20    1.40
  -1   3   0   26.20    1.30
  -1   3   0   26.00    1.60
   1   3   0   23.10    1.50
   1   3   0   23.30    1.50
  -2  -3   0    9.10    0.90
  -2  -3   0    6.60    0.70
  -2  -3   0    9.00    0.70
   2  -3   0    8.80    0.90
  -2  -3   0    9.60    0.80
   2  -3   0    9.50    0.90
  -2   3   0    9.60    0.90
   2   3   0    8.40    0.90
   2   3   0    8.90    0.80
  -2   3   0   10.30    1.00
   2   3   0    9.00    0.60
   2   3   0    9.50    0.80
   3  -3   0   41.40    2.50
   3  -3   0   41.90    2.50
  -3  -3   0   41.10    2.20
   3  -3   0   39.70    2.50
  -3  -3   0   40.10    2.50
  -3   3   0   45.80    2.60
   3   3   0   40.80    2.40
   3   3   0   41.70    2.60
   3   3   0   40.10    2.40
  -3   3   0   42.80    2.50
   3   3   0   39.70    2.30
  -4  -3   0  259.97   12.10
   4  -3   0  261.97   12.50
  -4  -3   0  246.78   12.10
  -4  -3   0  254.37   12.70
   4  -3   0  263.27   12.30
   4  -3   0  267.67   12.40
  -4   3   0  243.48   12.30
  -4   3   0  251.47   12.00
   4   3   0  264.57   12.50
   4   3   0  251.97   12.20
   4   3   0  221.88   12.00
  -4   3   0  246.18   12.40
   4   3   0  259.27   12.20
  -5  -3   0  155.18    8.30
   5  -3   0  173.68    8.60
   5  -3   0  174.38    8.80
  -5  -3   0  170.08    8.70
  -5  -3   0  165.88    8.30
   5  -3   0  170.08    8.50
  -5   3   0  171.68    8.20
  -5   3   0  176.58    9.00
   5   3   0  163.88    8.60
   5   3   0  170.68    8.80
   5   3   0  156.28    8.30
   6  -3   0    0.30    0.40
   6  -3   0    0.10    0.60
   6  -3   0    1.30    0.60
  -6  -3   0    0.60    0.40
   6   3   0    0.40    0.70
  -6   3   0    1.10    0.40
   6   3   0    0.40    0.50
   6   3   0    1.10    0.60
   7  -3   0   53.19    3.80
   7  -3   0   52.39    3.70
   7  -3   0   58.29    3.60
   7   3   0   56.49    3.90
   7   3   0   56.69    3.40
  -7   3   0   52.59    3.20
   7   3   0   49.99    3.40
   8  -3   0   21.80    2.30
   8  -3   0   21.30    2.10
   8   3   0   20.50    2.20
   8   3   0   17.30    1.80
   8   3   0   21.80    1.90
   9  -3   0   32.20    3.20
   9  -3   0   39.20    3.00
   9   3   0   37.60    2.90
   9   3   0   31.20    2.60
   9   3   0   35.00    2.80
   9   3   0   37.50    3.30
  10  -3   0   40.20    3.80
  10  -3   0   48.40    3.50
  10   3   0   47.50    3.30
  10   3   0   45.90    4.00
  10   3   0   40.70    3.20
  11  -3   0    0.50    0.90
  11  -3   0    2.60    2.00
  11   3   0    0.60    1.10
  11   3   0   -0.80    0.80
  11   3   0    0.30    1.10
  12  -3   0   56.49    5.00
  12  -3   0   57.99    4.30
  12   3   0   62.79    4.10
  12   3   0   56.79    4.20
  12   3   0   51.59    4.80
  13  -3   0    6.90    2.00
  13  -3   0   11.30    2.10
  13   3   0   14.00    2.20
  13   3   0    8.10    1.70
  13   3   0    9.80    2.50
  14  -3   0    3.80    1.60
  14  -3   0    2.50    1.60
  14   3   0    4.20    1.90
  14   3   0    3.50    1.40
  14   3   0   -2.10    1.60
  15  -3   0    4.70    1.60
  15  -3   0    7.60    1.90
  15  -3   0    9.60    2.60
  15   3   0    6.50    1.80
  15   3   0   12.20    2.00
  15   3   0    8.30    2.40
  16  -3   0    3.40    1.60
  16   3   0   -1.40    1.70
  16   3   0    0.50    1.50
   0  -4   0   48.10    2.40
   0  -4   0   50.49    2.50
   0  -4   0   45.90    2.70
   0   4   0   47.60    2.40
   0   4   0   49.99    2.50
  -1  -4   0    6.00    0.70
   1  -4   0    5.80    0.50
   1  -4   0    6.30    0.90
  -1  -4   0    6.00    0.80
  -1  -4   0    4.90    0.60
   1  -4   0    5.00    0.60
   1   4   0    5.70    0.60
  -1   4   0    6.90    0.70
  -1   4   0    5.80    0.80
   1   4   0    5.60    0.80
  -1   4   0    5.30    0.50
   1   4   0    6.40    0.80
  -2  -4   0  102.29    5.30
  -2  -4   0  106.09    5.40
   2  -4   0  118.09    5.40
   2  -4   0  106.99    5.50
  -2  -4   0   98.69    5.40
   2   4   0  102.79    5.30
   2   4   0  103.49    5.00
  -2   4   0  106.59    5.50
  -2   4   0  118.59    5.50
   2   4   0  106.99    5.40
   2   4   0  102.59    5.40
  -3  -4   0  414.36   19.40
  -3  -4   0  408.06   19.60
   3  -4   0  420.56   19.80
  -3  -4   0  427.86   19.80
   3  -4   0  419.56   19.90
   3  -4   0  428.66   19.70
  -3   4   0  425.36   19.80
   3   4   0  417.16   19.80
   3   4   0  424.06   19.70
   3   4   0  420.26   19.40
  -3   4   0  373.66   20.40
   3   4   0  433.16   19.60
  -4  -4   0   16.90    1.20
  -4  -4   0   17.60    1.40
   4  -4   0   14.80    1.50
   4  -4   0   17.40    1.50
   4  -4   0   18.10    1.50
   4   4   0   14.70    1.30
   4   4   0   16.80    1.40
   4   4   0   14.50    1.50
   4   4   0   15.50    1.20
  -4   4   0   16.30    1.50
  -4   4   0   14.70    1.10
  -5  -4   0    3.20    0.70
   5  -4   0    2.50    0.80
   5  -4   0    0.90    0.70
   5  -4   0    2.70    0.90
  -5  -4   0    1.70    0.60
   5   4   0    1.80    0.60
   5   4   0    2.00    0.70
   5   4   0    2.20    0.70
   5   4   0    2.90    0.70
  -5   4   0    2.30    0.50
   6  -4   0   71.99    4.30
   6  -4   0   70.49    4.50
  -6  -4   0   66.39    3.90
   6  -4   0   75.19    4.20
   6   4   0   67.59    4.60
   6   4   0   64.49    4.00
   6   4   0   76.49    4.20
   6   4   0   63.99    3.90
   7  -4   0   51.89    3.30
   7  -4   0   46.00    3.40
   7  -4   0   49.40    3.70
  -7   4   0   52.99    2.90
   7   4   0   52.09    3.30
   7   4   0   50.99    3.60
   7   4   0   41.70    3.20
   7   4   0   45.50    3.20
   8  -4   0   11.00    1.70
   8  -4   0   14.00    2.10
   8   4   0    9.90    1.50
   8   4   0   11.00    1.90
   8   4   0   11.40    1.60
   8   4   0    8.40    1.50
   9  -4   0    8.50    1.50
   9  -4   0    6.50    1.70
   9   4   0    7.50    1.50
   9   4   0    5.20    1.60
   9   4   0    7.10    1.40
   9   4   0    7.60    1.40
  10  -4   0    0.60    0.90
  10  -4   0    0.50    0.90
  10   4   0    1.30    0.90
  10   4   0    1.00    0.80
  10   4   0    0.00    1.00
  10   4   0    0.90    0.80
  11  -4   0  170.88   10.50
  11  -4   0  184.38    9.60
  11   4   0  158.28    9.30
  11   4   0  178.58   10.30
  11   4   0  163.58    9.00
  12  -4   0   18.30    2.50
  12  -4   0   13.90    2.80
  12   4   0   16.50    2.60
  12   4   0   13.30    2.00
  12   4   0   17.90    2.90
  13  -4   0   30.50    3.10
  13  -4   0   35.80    3.90
  13   4   0   31.70    3.10
  13   4   0   29.60    2.90
  13   4   0   30.80    4.20
  14  -4   0    1.50    1.20
  14  -4   0    2.10    1.20
  14   4   0    0.50    1.50
  14   4   0    4.70    1.40
  14   4   0    3.10    1.30
  15  -4   0    7.50    2.30
  15  -4   0    9.00    2.30
  15   4   0   10.40    1.90
  15   4   0    7.30    2.00
  15   4   0   15.30    2.90
   0  -5   0    0.70    0.30
   0  -5   0    0.80    0.30
   0  -5   0    0.40    0.40
   0   5   0    0.70    0.30
   0   5   0    0.90    0.40
   0   5   0    0.70    0.30
  -1  -5   0  152.08    7.70
   1  -5   0  157.58    7.80
   1  -5   0  163.88    7.40
  -1  -5   0  154.28    7.50
  -1  -5   0  148.49    7.60
   1  -5   0  152.28    7.40
  -1   5   0  164.58    7.50
   1   5   0  149.09    7.70
   1   5   0  159.18    7.50
  -1   5   0  155.98    7.80
  -1   5   0  153.48    7.30
   1   5   0  148.39    7.60
  -2  -5   0  602.94   29.30
  -2  -5   0  645.84   29.30
   2  -5   0  706.13   29.20
   2  -5   0  611.64   29.40
  -2  -5   0  551.34   29.10
  -2   5   0  649.24   29.40
   2   5   0  625.24   29.30
   2   5   0  540.65   29.00
  -2   5   0  702.43   29.30
  -2   5   0  647.24   28.90
   2   5   0  620.54   29.30
  -3  -5   0  650.83   32.50
  -3  -5   0  646.74   32.30
  -3  -5   0  693.73   32.60
   3  -5   0  717.83   32.30
   3  -5   0  687.53   32.50
   3   5   0  693.13   32.30
  -3   5   0  762.62   32.60
   3   5   0  669.93   32.50
   3   5   0  708.93   32.00
   3   5   0  724.33   32.50
  -3   5   0  691.13   32.60
   4  -5   0   21.10    1.80
  -4  -5   0   18.30    1.30
   4  -5   0   17.90    1.60
  -4  -5   0   19.80    1.70
   4  -5   0   22.50    1.70
  -4  -5   0   15.10    1.40
  -4   5   0   17.60    1.60
   4   5   0   17.70    1.50
   4   5   0   17.90    1.70
  -4   5   0   20.60    1.70
   4   5   0   16.70    1.50
   4   5   0   20.10    1.30
  -5  -5   0  130.29    7.30
   5  -5   0  141.89    7.70
   5  -5   0  149.59    7.20
   5  -5   0  141.69    7.50
  -5  -5   0  137.09    6.90
   5   5   0  130.49    7.10
   5   5   0  140.39    7.50
   5   5   0  142.79    7.30
   5   5   0  135.19    6.90
  -5   5   0  131.69    6.70
   6  -5   0   32.50    2.40
   6  -5   0   26.10    2.20
  -6  -5   0   28.30    2.00
   6  -5   0   30.40    2.50
   6   5   0   29.40    2.20
   6   5   0   24.90    1.90
   6   5   0   26.20    2.20
  -6   5   0   27.20    1.80
   6   5   0   28.10    2.40
  -7  -5   0  310.57   15.50
   7  -5   0  341.27   16.40
   7  -5   0  326.77   16.40
   7  -5   0  320.97   15.70
   7   5   0  306.77   16.10
  -7   5   0  318.57   15.20
   7   5   0  312.17   15.70
   7   5   0  307.47   15.40
   7   5   0  333.57   15.80
   8  -5   0   10.30    1.60
   8  -5   0   10.70    2.00
   8   5   0   11.90    2.00
   8   5   0   12.10    1.70
   8   5   0   12.60    1.80
   8   5   0   11.30    1.50
   9  -5   0    4.20    1.20
   9  -5   0    3.10    1.20
   9   5   0    2.80    0.90
   9   5   0    4.40    1.30
   9   5   0    4.10    1.10
   9   5   0    3.90    1.20
  10  -5   0  128.59    6.70
  10  -5   0   99.39    7.10
  10   5   0  108.09    6.10
  10   5   0  110.69    6.60
  10   5   0  100.59    7.00
  10   5   0  104.09    6.50
  11  -5   0   16.90    2.40
  11   5   0   20.70    2.30
  11   5   0   13.60    2.50
  11   5   0   19.50    1.90
  12  -5   0   44.10    4.50
  12  -5   0   65.39    4.30
  12   5   0   53.99    3.70
  12   5   0   49.00    4.60
  12   5   0   45.90    3.90
  13  -5   0   14.90    2.90
  13  -5   0   12.00    2.10
  13   5   0   11.60    2.50
  13   5   0   12.80    2.30
  13   5   0    8.80    1.80
  14  -5   0   -0.30    1.20
  14  -5   0   -1.60    1.10
  14   5   0   -0.60    1.10
  14   5   0    0.70    1.40
  14   5   0   -0.70    1.20
  15  -5   0    1.60    1.50
  15  -5   0    2.10    1.90
  15   5   0    1.20    1.50
  15   5   0    0.30    1.50
  15   5   0    0.80    1.20
   0  -6   0  561.94   25.80
   0  -6   0  546.55   26.10
   0  -6   0  554.94   25.60
   0   6   0  545.95   26.20
   0   6   0  583.64   25.80
   0   6   0  544.05   25.60
   1  -6   0  730.93   34.20
   1  -6   0  745.33   33.70
  -1  -6   0  708.83   33.80
   1  -6   0  767.22   33.80
  -1  -6   0  710.03   34.10
  -1  -6   0  694.83   34.10
  -1  -6   0  709.73   33.60
   1   6   0  732.83   33.50
  -1   6   0  717.43   33.70
   1   6   0  744.63   33.80
  -1   6   0  741.43   34.20
  -1   6   0  805.82   33.80
   1   6   0  718.83   34.10
   1   6   0  710.13   34.10
  -2  -6   0  249.38   13.10
  -2  -6   0  274.57   12.90
  -2  -6   0  257.87   13.10
   2  -6   0  267.97   13.20
   2  -6   0  291.47   12.90
   2   6   0  256.37   13.20
  -2   6   0  267.97   12.70
  -2   6   0  283.47   13.30
   2   6   0  273.97   12.90
  -2   6   0  303.77   13.10
   2   6   0  258.37   13.10
  -3  -6   0   65.89    3.90
  -3  -6   0   66.69    4.00
   3  -6   0   73.49    3.90
  -3  -6   0   67.59    3.80
   3  -6   0   68.59    4.00
  -3   6   0   67.99    3.60
   3   6   0   67.69    3.80
  -3   6   0   80.49    4.10
   3   6   0   72.49    4.10
   3   6   0   68.99    4.00
  -3   6   0   70.59    4.10
  -4  -6   0  152.18    8.30
   4  -6   0  162.28    8.40
   4  -6   0  171.18    8.30
   4  -6   0  162.58    8.30
   4   6   0  160.78    7.70
   4   6   0  153.48    8.30
   4   6   0  152.08    8.20
   4   6   0  160.98    8.30
  -4   6   0  163.18    8.30
   5  -6   0   52.39    3.60
  -5  -6   0   53.79    3.00
  -5  -6   0   48.20    3.40
   5  -6   0   57.29    3.40
   5  -6   0   52.49    3.50
  -5   6   0   51.09    3.40
   5   6   0   50.89    3.50
   5   6   0   52.49    3.30
   5   6   0   56.39    3.50
   5   6   0   49.30    2.90
  -5   6   0   56.69    2.90
   6  -6   0  255.67   13.00
   6  -6   0  244.18   12.70
  -6  -6   0  255.27   12.30
   6  -6   0  284.07   12.70
   6   6   0  252.87   12.60
  -6   6   0  251.67   12.10
   6   6   0  253.07   13.00
   6   6   0  230.78   12.10
   6   6   0  243.58   12.60
  -7  -6   0   92.29    5.20
   7  -6   0   92.59    5.90
   7  -6   0  104.09    5.60
   7   6   0   96.49    5.10
   7   6   0   99.39    5.90
   7   6   0   84.99    5.40
  -7   6   0   94.09    4.90
   7   6   0   95.99    5.60
   8  -6   0   35.10    2.80
   8  -6   0   33.10    3.10
   8   6   0   33.30    2.70
   8   6   0   31.80    2.70
   8   6   0   33.20    2.40
   8   6   0   35.70    3.10
  -8   6   0   32.90    2.40
   9  -6   0   35.80    3.30
   9  -6   0   40.60    3.00
   9   6   0   29.70    2.40
   9   6   0   36.70    2.90
   9   6   0   36.40    2.90
   9   6   0   33.20    3.10
  10  -6   0   -0.20    0.80
  10  -6   0    0.40    1.10
  10   6   0   -0.50    0.70
  10   6   0    1.40    0.90
  10   6   0    0.70    0.90
  10   6   0   -0.10    0.90
  11  -6   0   30.70    3.00
  11  -6   0   29.10    3.40
  11   6   0   35.10    3.10
  11   6   0   34.70    3.50
  11   6   0   35.30    2.70
  11   6   0   34.00    3.10
  12  -6   0   10.50    2.50
  12  -6   0    5.60    1.60
  12   6   0    7.30    1.60
  12   6   0    6.90    1.80
  12   6   0    6.40    1.40
  13  -6   0   13.00    2.90
  13  -6   0   11.90    2.30
  13   6   0   16.60    2.10
  13   6   0   16.60    2.80
  13   6   0   13.90    2.90
  14  -6   0    5.60    1.80
  14  -6   0    7.00    2.10
  14   6   0    5.90    2.20
  14   6   0    5.30    1.70
  14   6   0    1.80    1.30
  15  -6   0   20.20    2.90
  15  -6   0   15.40    3.20
  15   6   0   14.10    2.90
  15   6   0   22.50    2.70
  15   6   0   15.20    2.70
   0  -7   0    0.50    0.30
   0  -7   0    0.30    0.40
   0  -7   0    0.50    0.20
   0   7   0    0.80    0.40
   0   7   0    0.40    0.30
   0   7   0    0.40    0.50
   1  -7   0   17.90    1.20
  -1  -7   0   18.90    1.30
  -1  -7   0   20.80    1.60
   1  -7   0   17.70    1.20
  -1  -7   0   17.00    1.10
   1  -7   0   17.80    1.60
   1   7   0   17.00    1.00
  -1   7   0   20.20    1.70
   1   7   0   19.30    1.30
   1   7   0   16.40    1.50
  -1   7   0   18.30    1.30
  -1   7   0   19.30    1.20
   2  -7   0 1611.94   75.39
  -2  -7   0 1532.05   75.59
  -2  -7   0 1598.84   75.89
   2  -7   0 1617.74   75.99
   2  -7   0 1854.81   75.69
  -2  -7   0 1544.95   75.89
  -2   7   0 1667.93   76.09
  -2   7   0 1817.72   75.79
  -2   7   0 1622.84   75.39
   2   7   0 1624.64   75.59
   2   7   0 1628.64   75.89
   2   7   0 1620.24   75.99
   3  -7   0  338.07   16.40
  -3  -7   0  326.97   16.10
   3  -7   0  358.06   16.10
  -3  -7   0  321.97   16.20
  -3  -7   0  314.37   16.30
   3   7   0  325.87   16.30
   3   7   0  324.07   16.00
  -3   7   0  384.96   16.40
  -3   7   0  323.07   16.40
  -3   7   0  340.57   15.80
   3   7   0  346.87   16.40
  -4  -7   0  167.28    9.10
   4  -7   0  186.18    8.90
   4  -7   0  175.58    9.20
   4   7   0  171.78    9.20
  -4   7   0  179.88    9.20
   4   7   0  174.98    9.10
   4   7   0  181.88    8.90
   4   7   0  177.08    8.40
   5  -7   0  308.77   15.20
   5  -7   0  296.67   15.30
   5  -7   0  318.47   15.00
  -5   7   0  296.27   15.20
   5   7   0  320.87   15.00
   5   7   0  314.17   15.20
   5   7   0  292.17   14.40
   5   7   0  300.97   15.20
   6  -7   0   73.09    4.80
   6  -7   0   77.19    4.50
   6  -7   0   72.49    4.60
   6   7   0   64.89    4.40
   6   7   0   72.39    4.00
   6   7   0   74.29    4.40
   6   7   0   75.19    4.70
  -6   7   0   73.79    3.90
   7  -7   0  265.77   12.80
   7  -7   0  249.18   13.30
  -7  -7   0  248.28   12.40
   7   7   0  246.88   12.90
   7   7   0  256.07   12.30
   7   7   0  255.17   12.80
   7   7   0  250.17   13.20
  -7   7   0  252.37   12.20
   8  -7   0    2.00    0.90
   8  -7   0    2.00    1.00
  -8   7   0    4.40    0.80
   8   7   0    3.40    0.90
   8   7   0    3.50    1.00
   8   7   0    4.10    1.30
   8   7   0    3.40    0.90
   9  -7   0    1.70    1.10
   9  -7   0    2.00    1.00
   9   7   0    0.90    0.80
   9   7   0    2.00    0.80
   9   7   0    1.00    0.80
   9   7   0    2.40    1.10
  10  -7   0   79.49    5.90
  10   7   0   91.09    5.50
  10   7   0   82.79    5.90
  10   7   0   89.09    5.50
  10   7   0   75.19    4.70
  11  -7   0    0.20    0.90
  11  -7   0    0.80    1.00
  11   7   0   -0.30    0.90
  11   7   0    1.20    0.90
  11   7   0    0.50    0.90
  11   7   0    1.40    1.00
  12  -7   0   13.60    2.20
  12  -7   0   17.30    3.20
  12   7   0   16.20    1.90
  12   7   0   19.20    3.00
  12   7   0   15.50    2.50
  13  -7   0    6.80    1.80
  13  -7   0   11.70    2.60
  13   7   0    9.60    2.00
  13   7   0   11.40    1.80
  13   7   0   17.30    3.20
  14  -7   0    3.90    1.80
  14  -7   0    7.20    1.90
  14   7   0    5.60    2.00
  14   7   0    3.20    1.60
  14   7   0    4.20    1.50
  15  -7   0    2.60    1.50
  15  -7   0   -0.60    1.20
  15   7   0   -1.90    1.30
  15   7   0   -0.30    1.30
  15   7   0   -1.30    1.50
   0  -8   0   28.70    2.20
   0  -8   0   33.90    2.00
   0  -8   0   32.00    1.80
   0   8   0   32.70    2.40
   0   8   0   34.30    1.90
   0   8   0   29.70    1.80
   1  -8   0  360.06   17.90
   1  -8   0  386.46   17.50
  -1  -8   0  362.66   17.30
  -1  -8   0  358.86   17.50
   1  -8   0  377.06   17.40
  -1  -8   0  354.46   17.80
  -1   8   0  377.26   17.40
   1   8   0  381.46   17.50
   1   8   0  371.96   18.00
  -1   8   0  387.96   17.50
  -1   8   0  362.96   18.10
   1   8   0  374.56   17.20
  -2  -8   0  561.84   27.40
   2  -8   0  544.35   26.90
   2  -8   0  603.04   27.60
  -2  -8   0  566.24   27.50
   2  -8   0  617.34   27.10
  -2  -8   0  560.54   27.10
  -2   8   0  581.34   27.70
  -2   8   0  556.14   26.80
   2   8   0  582.14   27.50
   2   8   0  557.14   27.50
   2   8   0  597.74   27.10
  -2   8   0  633.84   27.30
  -3  -8   0   17.60    1.60
  -3  -8   0   16.40    1.60
  -3  -8   0   15.10    1.50
   3  -8   0   19.10    1.60
   3  -8   0   15.70    1.60
   3   8   0   15.50    1.60
  -3   8   0   17.50    1.20
   3   8   0   18.50    1.70
  -3   8   0   22.50    1.70
  -3   8   0   19.80    1.80
   4  -8   0    6.70    1.20
  -4  -8   0    4.60    1.10
   4  -8   0    6.60    1.20
  -4   8   0    9.40    1.50
   4   8   0    6.40    1.10
   4   8   0    6.20    1.30
   4   8   0    6.80    1.20
  -4   8   0    6.10    0.70
   5  -8   0    7.70    1.30
   5  -8   0    6.00    1.30
   5  -8   0    7.00    1.30
   5   8   0    5.30    1.20
  -5   8   0    7.60    1.40
   5   8   0    7.60    0.80
   5   8   0    5.50    1.10
   6  -8   0  355.46   17.80
   6  -8   0  357.56   17.30
  -6   8   0  345.67   17.50
   6   8   0  355.06   17.30
  -6   8   0  341.97   16.60
   6   8   0  352.46   17.70
   6   8   0  372.16   17.60
   6   8   0  343.67   16.60
   7  -8   0   80.19    4.70
   7  -8   0   71.09    5.00
   7   8   0   71.99    4.00
   7   8   0   74.39    4.70
   7   8   0   65.49    4.80
   7   8   0   80.39    4.70
   8  -8   0    1.60    0.80
   8  -8   0    1.60    0.90
   8   8   0    2.90    1.10
   8   8   0    0.70    0.80
   8   8   0    2.30    0.90
   8   8   0    1.40    0.70
  -8   8   0    1.60    0.50
   9  -8   0   57.59    4.20
   9  -8   0   62.09    4.70
   9   8   0   57.79    3.50
   9   8   0   56.09    4.50
   9   8   0   59.59    4.30
   9   8   0   64.89    4.30
  10  -8   0   25.00    2.60
  10  -8   0   22.50    3.30
  10   8   0   25.00    2.10
  10   8   0   20.60    3.10
  10   8   0   22.70    2.50
  11  -8   0    1.50    1.00
  11  -8   0    1.10    1.10
  11   8   0   -0.70    0.80
  11   8   0    0.10    0.70
  11   8   0   -0.20    0.80
  11   8   0   -0.20    0.80
  12  -8   0    6.90    2.20
  12  -8   0    8.00    1.90
  12   8   0    7.60    1.40
  12   8   0    8.50    2.00
  12   8   0    3.40    1.40
  13  -8   0    7.00    2.20
  13  -8   0    4.80    1.70
  13   8   0    3.90    1.80
  13   8   0    7.30    1.50
  13   8   0    7.00    2.00
  14  -8   0    5.80    1.90
  14  -8   0    6.10    1.80
  14   8   0    7.00    2.30
  14   8   0    8.10    2.10
  15  -8   0    2.90    1.80
  15  -8   0    2.00    2.20
  15   8   0    5.80    1.80
  15   8   0    6.40    1.80
  15   8   0    2.70    1.70
   0  -9   0    0.40    0.30
   0  -9   0    0.20    0.30
   0  -9   0    0.70    0.60
   0   9   0    0.30    0.30
   0   9   0    0.10    0.50
   0   9   0    0.20    0.30
   1  -9   0  109.19    6.30
  -1  -9   0  115.39    5.60
  -1  -9   0  112.99    5.90
   1  -9   0  119.49    5.80
  -1  -9   0  116.69    6.30
  -1  -9   0  111.29    6.20
   1  -9   0  107.49    5.80
   1   9   0  125.99    5.90
  -1   9   0  121.49    5.90
  -1   9   0  113.69    6.50
   1   9   0  117.69    6.50
   1   9   0  112.29    5.50
  -1   9   0  116.49    5.70
  -2  -9   0   44.00    3.00
   2  -9   0   44.70    2.50
  -2  -9   0   48.90    3.20
   2  -9   0   46.20    3.10
  -2  -9   0   47.00    2.80
   2  -9   0   46.40    2.70
   2   9   0   39.60    3.00
  -2   9   0   43.90    3.20
  -2   9   0   43.40    2.50
   2   9   0   43.70    2.70
   2   9   0   45.50    3.00
  -2   9   0   47.30    2.80
   3  -9   0  183.68    8.70
  -3  -9   0  169.88    9.00
   3  -9   0  171.38    9.10
   3   9   0  165.58    9.00
   3   9   0  172.08    8.70
   3   9   0  181.88   10.20
  -3   9   0  168.28    9.20
  -3   9   0  171.48    8.30
   4  -9   0    1.90    0.60
   4  -9   0    0.60    0.60
  -4   9   0   -0.10    0.50
   4   9   0    1.80    0.70
   4   9   0    0.50    0.70
   4   9   0    0.50    0.60
  -4   9   0    0.50    0.30
   5  -9   0   13.00    1.50
   5  -9   0   10.80    1.80
   5  -9   0   13.10    1.90
   5   9   0    9.40    1.50
   5   9   0   10.10    1.60
   5   9   0   10.40    1.70
   5   9   0   11.70    0.90
  -5   9   0   10.00    1.60
  -5   9   0   10.50    0.90
   6  -9   0  213.18   11.20
   6  -9   0  226.48   10.70
   6   9   0  200.48   11.00
   6   9   0  203.48   10.60
  -6   9   0  207.88   10.00
  -6   9   0  202.48   11.40
   6   9   0  193.18   10.80
   6   9   0  207.58    9.90
   7  -9   0   12.20    1.70
   7  -9   0    7.80    1.60
  -7   9   0    8.00    1.00
   7   9   0    8.20    1.00
   7   9   0    6.50    1.40
   7   9   0    8.80    1.70
   7   9   0    6.40    1.40
   8  -9   0   17.60    2.70
   8  -9   0   13.80    2.10
   8   9   0   10.90    1.10
   8   9   0   10.50    2.00
   8   9   0   11.80    2.00
   8   9   0    9.80    1.80
  -8   9   0    9.20    1.10
   9  -9   0    4.00    1.20
   9  -9   0    2.30    1.00
   9   9   0    2.10    1.00
   9   9   0    2.70    1.10
   9   9   0    1.80    0.80
   9   9   0    3.00    1.00
  10  -9   0   24.00    2.50
  10   9   0   16.60    2.50
  10   9   0   18.00    2.90
  10   9   0   20.70    2.70
  10   9   0   20.60    1.90
  11  -9   0   11.00    2.00
  11  -9   0   10.00    2.20
  11   9   0   13.20    2.40
  11   9   0   10.50    2.00
  11   9   0    8.10    1.40
  11   9   0    8.30    1.80
  12  -9   0    4.60    1.50
  12  -9   0    6.40    2.20
  12   9   0    6.50    1.30
  12   9   0    3.00    1.50
  12   9   0    3.10    1.60
  12   9   0    4.60    1.30
  13  -9   0   59.49    5.40
  13  -9   0   61.99    4.80
  13   9   0   59.39    3.90
  13   9   0   58.19    5.50
  13   9   0   61.79    4.90
  14  -9   0   22.20    3.80
  14   9   0   20.30    3.40
  14   9   0   27.40    3.10
  14   9   0   20.10    2.40
  15  -9   0    1.00    1.20
  15   9   0   -1.90    1.40
  15   9   0    1.70    1.40
  15   9   0    2.70    1.60
   0 -10   0   29.20    2.00
   0 -10   0   25.90    2.10
   0 -10   0   23.40    1.60
   0  10   0   25.40    1.60
   0  10   0   25.30    1.70
   0  10   0   24.90    2.30
   1 -10   0    2.70    0.60
  -1 -10   0    1.90    0.60
  -1 -10   0    2.40    0.80
  -1 -10   0    2.70    0.50
   1 -10   0    3.00    0.60
   1 -10   0    2.20    0.90
   1  10   0    2.50    0.50
  -1  10   0    2.40    1.00
  -1  10   0    3.20    0.60
   1  10   0    1.60    0.80
   1  10   0    2.10    0.60
   2 -10   0   59.79    3.50
  -2 -10   0   66.89    4.00
  -2 -10   0   64.09    4.00
   2 -10   0   59.89    4.00
   2 -10   0   64.69    3.60
  -2  10   0   68.69    3.80
  -2  10   0   63.59    4.20
  -2  10   0   64.99    3.40
   2  10   0   61.09    4.10
   2  10   0   61.69    4.00
   2  10   0   68.19    4.00
   3 -10   0    1.60    0.60
  -3 -10   0    1.00    0.70
   3 -10   0   -0.90    0.50
   3  10   0    0.90    0.60
   3  10   0   -0.10    0.40
   3  10   0    0.00    0.50
  -3  10   0    1.20    0.80
  -3  10   0    0.60    0.30
   4 -10   0   39.70    2.60
   4  10   0   38.40    3.00
  -4  10   0   36.50    2.10
   4  10   0   33.70    3.00
   4  10   0   35.00    2.50
  -4  10   0   35.30    2.90
   5 -10   0  189.58    9.30
   5  10   0  175.48    9.60
   5  10   0  175.48    9.30
   5  10   0  170.28    9.60
  -5  10   0  178.18    8.70
   6 -10   0   70.29    4.20
   6 -10   0   64.89    4.60
   6  10   0   66.19    4.50
  -6  10   0   67.39    3.70
   6  10   0   63.69    4.50
  -6  10   0   68.49    4.50
   6  10   0   71.79    4.30
   6  10   0   60.49    3.40
   7 -10   0    0.60    0.70
   7 -10   0    0.70    0.70
   7  10   0   -0.40    0.40
  -7  10   0    0.20    0.40
   7  10   0   -0.10    0.60
  -7  10   0   -0.10    0.40
  -7  10   0    0.30    0.60
   7  10   0    0.20    0.50
   7  10   0   -0.20    0.60
   8 -10   0   -0.20    0.70
   8 -10   0    0.50    0.70
   8  10   0    0.70    0.70
   8  10   0    1.00    0.70
   8  10   0    0.00    0.70
  -8  10   0    0.60    0.40
   8  10   0   -0.70    0.60
   9 -10   0   80.89    5.80
   9  10   0   75.59    5.30
  -9  10   0   74.29    4.20
   9  10   0   78.59    5.50
   9  10   0   79.29    5.10
   9  10   0   72.49    5.00
  10 -10   0   99.49    6.70
  10 -10   0   83.59    5.70
  10  10   0   93.89    6.40
  10  10   0   90.19    5.90
  10  10   0   95.69    6.10
  10  10   0   84.09    4.90
  11 -10   0    3.20    1.40
  11 -10   0    0.00    1.10
  11  10   0    4.40    1.50
  11  10   0    1.60    1.10
  11  10   0    1.70    0.90
  11  10   0    2.30    1.00
  12 -10   0   15.80    3.10
  12 -10   0   13.40    2.10
  12  10   0   15.70    1.70
  12  10   0   14.10    2.30
  12  10   0   11.90    2.50
  12  10   0   10.90    2.20
  13 -10   0    1.80    1.30
  13 -10   0   -0.40    1.30
  13  10   0   -0.30    1.00
  13  10   0    2.90    1.40
  13  10   0    1.80    1.50
  14 -10   0   29.10    3.30
  14 -10   0   29.30    4.50
  14  10   0   28.80    2.70
  14  10   0   21.50    3.20
  14  10   0   25.50    3.90
  15 -10   0    4.70    2.00
  15 -10   0    5.90    1.80
  15  10   0    4.20    1.50
  15  10   0    3.60    1.70
  15  10   0    4.40    1.60
   0 -11   0    0.50    0.40
   0  11   0    0.00    0.50
   0  11   0    0.50    0.40
   0  11   0    0.20    0.40
  -1 -11   0   79.49    4.60
   1 -11   0   81.49    4.50
  -1 -11   0   85.19    4.30
   1 -11   0   81.89    4.50
   1  11   0   78.09    4.20
  -1  11   0   93.39    4.50
   1  11   0   88.69    4.60
  -1  11   0   89.49    4.60
   1  11   0   77.79    5.10
   2 -11   0   22.10    1.70
   2 -11   0   25.40    2.00
   2  11   0   23.60    1.80
   2  11   0   26.10    2.30
  -2  11   0   22.40    1.60
  -2  11   0   23.80    1.90
   3 -11   0   11.90    1.50
  -3  11   0    9.30    0.90
   3  11   0    9.30    1.40
   3  11   0    7.90    1.50
   3  11   0   10.50    1.90
   4 -11   0  288.17   13.80
   4  11   0  285.27   14.50
   4  11   0  285.07   13.90
  -4  11   0  281.57   13.30
   4  11   0  270.07   14.20
  -4  11   0  273.47   14.40
   5 -11   0   66.99    4.20
  -5  11   0   63.39    4.50
   5  11   0   66.59    4.50
  -5  11   0   69.99    3.60
   5  11   0   68.99    4.20
   5  11   0   67.89    4.60
   6 -11   0   31.80    3.00
   6 -11   0   34.10    2.60
   6  11   0   35.20    2.70
  -6  11   0   29.70    2.80
   6  11   0   31.90    2.90
   6  11   0   35.30    3.00
  -6  11   0   33.60    2.10
   7 -11   0   13.20    2.10
   7 -11   0   16.00    2.10
   7  11   0    9.50    1.60
  -7  11   0   10.50    1.90
   7  11   0   12.70    2.00
  -7  11   0   11.90    1.00
   7  11   0   11.60    1.90
   7  11   0    9.30    0.90
  -7  11   0   13.80    1.20
   8 -11   0   30.60    3.10
   8 -11   0   28.60    2.60
  -8  11   0   26.60    2.00
   8  11   0   31.40    2.70
   8  11   0   28.10    1.90
  -8  11   0   28.20    2.10
   8  11   0   31.40    3.00
   8  11   0   30.00    2.80
   9 -11   0  112.19    7.40
   9 -11   0  122.19    6.70
   9  11   0  114.89    7.20
   9  11   0  105.89    6.90
   9  11   0  107.19    7.00
   9  11   0  106.89    5.60
  -9  11   0  103.69    5.60
  10 -11   0   20.70    3.20
  10 -11   0   13.50    2.20
  10  11   0   17.60    1.50
  10  11   0   18.10    2.60
  10  11   0   14.90    2.70
  10  11   0   14.00    2.40
  11 -11   0   11.50    2.00
  11 -11   0    8.20    2.30
  11  11   0    9.00    2.00
  11  11   0    9.20    1.20
  11  11   0    9.40    3.10
  11  11   0    8.90    1.80
  12 -11   0    4.80    1.80
  12 -11   0    5.10    1.60
  12  11   0    5.20    1.50
  12  11   0    3.40    1.10
  12  11   0    3.30    1.40
  12  11   0    1.10    1.40
  13 -11   0   16.00    2.70
  13 -11   0   23.60    3.90
  13  11   0   25.50    2.20
  13  11   0   20.20    3.40
  13  11   0   24.40    3.40
  14 -11   0    8.20    2.30
  14 -11   0    6.90    1.90
  14  11   0   11.10    1.80
  14  11   0    8.20    2.20
  14  11   0    6.80    2.10
  15 -11   0    3.40    1.70
  15 -11   0    9.90    2.60
  15  11   0    6.30    2.00
  15  11   0    4.00    1.90
  15  11   0    6.20    2.00
   0 -12   0  408.16   19.50
   0 -12   0  396.06   19.60
   0  12   0  403.06   20.50
   0  12   0  413.86   19.50
   0  12   0  441.86   19.60
   1 -12   0   31.00    2.10
   1 -12   0   28.80    2.00
  -1 -12   0   29.20    1.90
  -1  12   0   30.50    2.00
  -1  12   0   30.10    2.70
  -1  12   0   31.80    2.20
   1  12   0   28.30    1.80
   1  12   0   35.30    2.80
   1  12   0   27.50    2.00
   2 -12   0    4.60    0.80
   2 -12   0    5.00    1.00
  -2  12   0    5.30    0.80
   2  12   0    2.60    1.10
   2  12   0    4.60    0.90
  -2  12   0    4.40    1.20
   3 -12   0   57.49    3.30
   3 -12   0   49.90    3.00
  -3  12   0   51.09    3.90
   3  12   0   51.39    3.30
  -3  12   0   54.79    2.90
   3  12   0   53.59    3.90
   3  12   0   51.79    3.70
   4 -12   0  115.09    6.00
   4  12   0   97.29    5.90
  -4  12   0  113.29    6.70
   4  12   0  104.59    6.40
  -4  12   0  101.59    5.40
   4  12   0  115.89    6.60
   5 -12   0  274.57   13.20
   5  12   0  268.87   13.90
  -5  12   0  261.87   13.80
   5  12   0  260.27   13.20
  -5  12   0  257.97   12.50
   5  12   0  249.97   13.60
   6 -12   0    1.10    0.80
   6 -12   0    2.80    1.10
  -6  12   0    3.90    1.30
   6  12   0    3.80    1.20
  -6  12   0    4.40    0.70
   6  12   0    2.90    1.10
   6  12   0    2.90    0.90
   7 -12   0   58.49    3.80
   7 -12   0   47.20    4.10
   7  12   0   56.09    4.20
  -7  12   0   56.49    4.20
   7  12   0   49.90    3.80
  -7  12   0   49.90    3.10
   7  12   0   58.39    4.30
  -7  12   0   53.09    2.90
   8 -12   0   14.60    2.20
   8 -12   0   17.10    2.70
   8  12   0   12.80    2.10
   8  12   0   10.90    2.20
  -8  12   0   14.90    1.40
   8  12   0   18.20    2.60
   9 -12   0   75.09    4.90
   9  12   0   69.59    3.80
   9  12   0   73.39    5.40
  -9  12   0   67.69    3.80
   9  12   0   66.89    5.20
   9  12   0   73.39    5.00
  -9  12   0   71.79    4.10
  10 -12   0   28.70    3.30
  10 -12   0   34.60    3.00
  10  12   0   31.00    3.40
 -10  12   0   25.40    2.10
  10  12   0   33.40    3.30
  10  12   0   31.40    3.00
  11 -12   0    2.30    1.30
  11 -12   0    2.20    1.50
  11  12   0    2.00    0.80
  11  12   0    2.20    1.30
  11  12   0    1.20    1.60
 -11  12   0    1.90    0.90
  11  12   0    1.10    1.00
  12 -12   0   13.10    2.40
  12 -12   0   13.60    2.70
  12  12   0   14.20    1.60
  12  12   0   12.00    2.20
 -12  12   0   14.80    1.90
  12  12   0   12.00    2.20
  12  12   0   14.60    2.70
  13 -12   0   -0.70    1.00
  13 -12   0    0.70    1.10
 -13  12   0    0.40    1.20
  13  12   0   -0.50    0.80
  13  12   0    1.70    1.80
  13  12   0   -0.40    1.10
  13  12   0    0.00    1.10
  14 -12   0   20.30    3.70
  14 -12   0   19.70    4.30
  14  12   0   19.90    3.20
  14  12   0   20.50    2.30
  14  12   0   21.20    3.50
   0 -13   0   -0.70    0.40
   0 -13   0    0.20    0.30
   0  13   0    0.70    0.60
   0  13   0    0.50    0.60
   1 -13   0   60.99    3.60
  -1 -13   0   60.59    3.50
   1 -13   0   64.39    3.70
  -1  13   0   68.69    3.60
   1  13   0   68.59    3.80
   1  13   0   60.69    3.50
  -1  13   0   67.49    3.80
   1  13   0   62.09    4.50
  -1  13   0   68.99    4.60
   2 -13   0   12.70    1.40
   2  13   0   13.90    2.20
   2  13   0   16.10    1.50
  -2  13   0   15.20    1.20
  -2  13   0   18.10    2.50
   3 -13   0  281.07   13.20
   3 -13   0  248.18   12.80
  -3  13   0  265.17   14.00
  -3  13   0  267.97   12.70
   3  13   0  260.27   13.90
   3  13   0  270.77   13.20
   4 -13   0  242.58   12.20
  -4  13   0  237.48   11.60
   4  13   0  239.18   12.70
   4  13   0  239.88   13.00
  -4  13   0  256.17   13.20
   4  13   0  249.68   12.30
   5 -13   0   17.00    2.10
   5  13   0   15.20    2.40
  -5  13   0   18.90    2.60
  -5  13   0   19.70    1.40
   5  13   0   21.50    2.20
   5  13   0   17.50    1.90
   6 -13   0    4.00    1.20
   6 -13   0    4.30    1.20
   6  13   0    3.10    1.20
   6  13   0    6.30    1.30
  -6  13   0    3.10    0.60
  -6  13   0    5.60    1.50
   6  13   0    1.80    0.90
   7 -13   0    1.30    0.80
   7 -13   0    0.20    0.70
   7  13   0    1.10    0.90
  -7  13   0    1.50    0.40
   7  13   0    2.10    1.10
  -7  13   0    1.40    1.00
  -7  13   0    1.30    0.50
   7  13   0    1.50    1.00
   8 -13   0   92.39    6.30
   8  13   0   86.29    6.00
  -8  13   0   83.59    4.50
  -8  13   0   88.49    4.70
  -8  13   0   89.19    6.00
   8  13   0   88.99    6.10
   9 -13   0    0.50    0.90
   9 -13   0    0.60    0.90
   9  13   0    1.80    1.30
  -9  13   0    0.00    0.60
   9  13   0   -0.40    0.70
  -9  13   0    0.70    0.80
   9  13   0   -0.40    0.90
  10 -13   0   -0.80    0.90
  10 -13   0    0.20    1.00
 -10  13   0    0.00    0.60
 -10  13   0   -0.30    0.70
  10  13   0    0.90    0.90
  10  13   0   -1.20    0.90
  10  13   0    0.10    0.60
  10  13   0    0.20    0.80
  11 -13   0    9.00    2.10
  11 -13   0    8.30    1.70
  11  13   0    8.90    2.10
  11  13   0    3.90    1.60
  11  13   0    6.70    1.80
  12 -13   0    0.00    1.00
  12 -13   0   -0.80    1.10
  12  13   0    0.50    1.30
 -12  13   0    1.10    1.00
  12  13   0    0.10    0.90
  12  13   0   -0.40    1.30
  12  13   0    0.30    1.10
  13 -13   0   12.60    2.30
  13 -13   0   14.80    3.10
  13  13   0   20.80    1.90
 -13  13   0   17.30    2.20
  13  13   0   15.10    2.80
  13  13   0   11.40    2.40
  13  13   0   22.40    3.60
  14 -13   0    1.20    1.40
 -14  13   0    0.20    1.90
  14  13   0    0.60    1.50
  14  13   0   -1.60    1.30
  14  13   0    0.70    1.30
   0 -14   0  393.66   18.80
   0  14   0  412.76   18.90
   0  14   0  407.86   18.90
   0  14   0  365.16   20.00
   1 -14   0  159.68    8.80
  -1 -14   0  173.98    8.60
  -1  14   0  184.98    8.70
   1  14   0  169.38    8.50
  -1  14   0  178.78    8.90
   1  14   0  164.58    9.80
  -1  14   0  167.18    9.80
   1  14   0  191.88    9.00
   2 -14   0    8.40    1.20
   2 -14   0   11.40    1.50
   2  14   0    7.40    1.80
   2  14   0    8.90    1.30
  -2  14   0    5.30    1.60
  -2  14   0   10.20    1.00
   3 -14   0   40.80    3.20
   3 -14   0   45.00    3.00
   3  14   0   45.30    3.70
   3  14   0   47.10    3.10
  -3  14   0   37.20    3.50
  -3  14   0   48.50    2.70
   4 -14   0   18.10    1.80
  -4  14   0   12.80    2.30
  -4  14   0   15.70    1.20
   4  14   0   11.40    2.00
   4  14   0   15.00    1.70
   4  14   0   20.40    2.90
   5 -14   0   48.60    3.20
  -5  14   0   40.90    3.60
   5  14   0   41.60    3.50
   5  14   0   40.20    3.60
   5  14   0   38.00    3.10
  -5  14   0   45.20    2.50
   6 -14   0    2.50    0.90
   6 -14   0    1.90    1.00
   6  14   0    0.50    0.80
  -6  14   0    1.00    0.40
   6  14   0    0.80    0.90
  -6  14   0    0.40    1.00
   6  14   0    0.80    0.90
   7 -14   0   63.79    4.40
   7 -14   0   72.79    5.20
  -7  14   0   64.19    4.90
   7  14   0   65.09    5.00
   7  14   0   64.49    4.50
  -7  14   0   68.19    3.60
   7  14   0   67.59    5.10
   8 -14   0   47.00    4.70
   8 -14   0   50.29    3.80
  -8  14   0   50.99    4.20
  -8  14   0   49.80    2.80
   8  14   0   49.20    4.20
   8  14   0   47.40    3.80
   8  14   0   53.89    4.40
  -8  14   0   53.69    3.00
   9 -14   0    1.40    0.90
   9 -14   0    1.70    0.90
  -9  14   0    0.60    0.60
   9  14   0    1.80    1.00
   9  14   0    2.00    1.60
   9  14   0    3.10    1.30
  10 -14   0   15.40    2.80
  10 -14   0   13.90    2.20
 -10  14   0   13.10    1.40
  10  14   0   12.40    2.70
  10  14   0   10.30    1.90
  10  14   0   15.60    2.70
 -10  14   0   11.20    1.50
  11 -14   0   14.80    3.00
  11 -14   0   15.10    2.40
 -11  14   0   12.90    1.50
  11  14   0   22.60    3.50
  11  14   0   18.70    3.00
  11  14   0   15.80    2.40
  12 -14   0    2.20    1.30
  12 -14   0    1.00    1.30
  12  14   0    0.20    1.00
  12  14   0    1.40    1.40
  12  14   0   -1.60    1.30
  13 -14   0   -1.60    1.30
  13 -14   0   -0.40    1.10
  13  14   0    1.90    1.20
  13  14   0    0.50    1.20
  13  14   0    1.00    1.80
 -13  14   0    0.30    1.40
  14 -14   0    2.90    1.70
  14 -14   0    0.50    1.20
  14  14   0    3.30    1.70
  14  14   0   -0.70    1.40
   0 -15   0    0.10    0.50
   0  15   0    0.40    0.50
   0  15   0    1.00    0.70
   0  15   0   -0.10    0.60
   1 -15   0   37.90    2.40
  -1 -15   0   32.60    2.20
   1  15   0   38.70    3.40
  -1  15   0   33.60    2.50
  -1  15   0   35.30    3.30
   1  15   0   37.50    2.50
   1  15   0   30.80    2.20
   2 -15   0    0.40    0.50
   2 -15   0    2.80    0.90
  -2  15   0    1.80    0.60
  -2  15   0    1.90    0.90
   2  15   0    2.20    0.80
   2  15   0    0.90    0.80
   3 -15   0   67.49    4.20
   3 -15   0   64.69    3.90
   3  15   0   66.19    5.00
  -3  15   0   67.49    5.00
  -3  15   0   73.69    3.80
   3  15   0   72.09    4.30
   4 -15   0  172.18    9.00
   4  15   0  163.08    9.60
   4  15   0  162.88    9.10
   4  15   0  170.78   10.00
  -4  15   0  179.88    8.40
  -4  15   0  178.08   10.10
   5 -15   0    5.90    1.40
   5  15   0    6.80    1.60
  -5  15   0    6.70    1.70
   5  15   0    7.40    1.50
   5  15   0    7.70    1.80
  -5  15   0    9.30    1.00
   6 -15   0   37.50    3.00
   6  15   0   39.80    3.40
  -6  15   0   30.50    3.30
   6  15   0   35.60    3.00
   6  15   0   34.70    3.40
  -6  15   0   35.90    2.20
   7 -15   0   79.59    5.80
   7 -15   0   80.39    5.10
   7  15   0   83.89    5.70
   7  15   0   72.69    5.60
  -7  15   0   82.19    4.20
  -7  15   0   82.39    5.70
   7  15   0   71.19    5.60
   8 -15   0    4.00    1.40
   8 -15   0    5.60    1.40
  -8  15   0    4.30    0.70
  -8  15   0    4.90    0.80
   8  15   0    2.50    1.40
  -8  15   0    6.50    1.60
   8  15   0    4.90    1.50
   8  15   0    4.60    1.80
   9 -15   0    1.20    1.00
   9 -15   0    0.40    0.70
   9  15   0   -0.30    1.10
   9  15   0    0.20    0.80
  -9  15   0    0.50    0.50
   9  15   0    0.70    1.20
  -9  15   0    1.00    0.50
  10 -15   0    0.80    0.90
  10 -15   0   -0.70    0.80
  10  15   0    1.50    1.00
  10  15   0    4.30    1.70
 -10  15   0    0.70    0.70
 -10  15   0   -0.40    0.80
  11 -15   0    6.80    1.60
  11 -15   0    6.20    2.10
  11  15   0    6.70    1.70
 -11  15   0    6.30    1.00
  11  15   0    4.30    1.80
  11  15   0    6.20    2.00
  12 -15   0   42.60    4.60
  12 -15   0   44.80    3.80
  12  15   0   37.30    4.00
 -12  15   0   31.80    2.50
  12  15   0   39.10    4.40
  12  15   0   40.30    3.90
  13 -15   0   17.70    3.50
  13  15   0   14.70    2.80
  13  15   0   14.50    2.60
  13  15   0   11.70    2.40
  14 -15   0   36.70    5.00
  14 -15   0   18.70    3.10
  14  15   0   26.90    3.90
  14  15   0   25.40    3.50
   0 -16   0    0.60    0.50
   0  16   0    0.60    0.70
   0  16   0   -0.40    0.60
   0  16   0    0.40    0.50
   1 -16   0   26.30    2.00
  -1 -16   0   25.20    1.90
   1  16   0   23.10    2.70
  -1  16   0   20.70    3.00
  -1  16   0   24.50    1.90
   1  16   0   26.90    2.10
   2 -16   0   41.40    2.80
   2 -16   0   41.70    2.80
  -2  16   0   35.80    3.60
   2  16   0   47.80    3.00
  -2  16   0   41.70    3.30
   2  16   0   39.60    3.60
   2  16   0   38.20    2.40
   3 -16   0   57.39    3.80
   3 -16   0   55.89    3.60
   3  16   0   61.99    3.90
   3  16   0   63.79    4.80
  -3  16   0   63.49    3.40
  -3  16   0   56.39    4.60
   4 -16   0   11.40    1.80
   4  16   0    9.10    2.00
   4  16   0    9.70    1.60
  -4  16   0    9.70    1.00
  -4  16   0   11.40    2.20
   5 -16   0   34.00    2.80
   5  16   0   30.00    3.30
  -5  16   0   35.30    2.10
   5  16   0   34.70    2.90
  -5  16   0   36.80    3.40
   5  16   0   34.80    3.20
   6 -16   0   15.10    2.20
  -6  16   0   15.80    2.60
   6  16   0   12.80    2.00
   6  16   0   14.40    2.60
   6  16   0   13.80    2.60
  -6  16   0   13.90    1.20
   7  16   0   76.39    5.10
  -7  16   0   73.19    3.90
   7  16   0   66.79    5.30
   7  16   0   76.99    5.80
  -7  16   0   81.69    5.70
   8 -16   0  155.18    9.50
   8 -16   0  134.09    8.40
  -8  16   0  140.59    7.10
   8  16   0  150.58    9.10
  -8  16   0  150.08    7.20
   8  16   0  156.98    8.80
   8  16   0  153.68    9.50
  -8  16   0  142.59    9.10
   9 -16   0   71.79    4.90
   9 -16   0   66.89    5.60
  -9  16   0   65.39    3.50
  -9  16   0   72.89    3.60
  -9  16   0   65.19    5.30
   9  16   0   66.49    5.40
   9  16   0   65.59    5.00
   9  16   0   63.29    5.30
  10 -16   0   47.50    4.10
  10 -16   0   53.19    4.90
  10  16   0   49.99    4.20
  10  16   0   51.49    4.70
  10  16   0   47.20    4.60
  11 -16   0   30.80    3.30
  11 -16   0   36.90    4.00
  11  16   0   33.80    3.80
  11  16   0   27.10    3.90
  11  16   0   39.90    3.70
  12 -16   0   10.40    2.30
  12 -16   0   16.80    3.20
  12  16   0   15.90    3.20
  12  16   0    7.80    2.00
  12  16   0   10.60    2.50
  13 -16   0    0.60    1.70
  13 -16   0    1.00    1.40
  13  16   0   -1.00    1.30
  13  16   0    1.60    1.40
  13  16   0   -0.70    1.10
   0 -17   0   -0.10    0.90
   0  17   0   -0.20    0.90
   0  17   0    0.70    0.90
   0  17   0    0.70    0.70
  -1 -17   0    1.60    0.60
   1 -17   0    3.40    0.90
   1  17   0    2.60    0.90
  -1  17   0    1.90    0.70
   1  17   0    1.50    1.00
   1  17   0    2.60    0.80
  -1  17   0    0.70    1.00
   2 -17   0   30.50    2.50
   2  17   0   35.30    2.20
  -2  17   0   38.70    2.40
   2  17   0   33.30    3.40
  -2  17   0   31.30    3.40
   2  17   0   38.70    2.70
   3 -17   0   65.99    4.10
   3 -17   0   73.39    4.40
   3  17   0   68.09    5.30
   3  17   0   74.19    4.50
  -3  17   0   73.89    4.00
  -3  17   0   65.39    5.30
   4 -17   0   16.00    1.90
  -4  17   0   14.80    1.40
   4  17   0   19.70    3.10
  -4  17   0   20.60    3.10
   4  17   0   17.50    2.20
   5 -17   0   36.60    3.00
   5  17   0   37.60    3.80
   5  17   0   33.00    3.00
  -5  17   0   38.20    3.70
  -5  17   0   38.80    2.30
   6 -17   0   36.50    3.20
   6  17   0   43.70    3.80
  -6  17   0   42.50    4.00
   6  17   0   48.40    4.00
  -6  17   0   40.60    2.40
   6  17   0   44.70    4.10
   7 -17   0   87.49    5.60
   7 -17   0   87.39    6.30
   7  17   0   83.29    8.70
   7  17   0   86.99    6.20
  -7  17   0   87.59    6.30
   7  17   0   83.29    5.60
  -7  17   0   84.09    4.40
   8 -17   0   78.39    5.90
   8 -17   0   79.79    5.20
  -8  17   0   75.59    5.70
   8  17   0   81.09    6.10
  -8  17   0   72.09    3.80
   8  17   0   71.49    5.20
  -8  17   0   67.39    3.70
   8  17   0   70.59    5.60
   9 -17   0   12.90    2.60
   9 -17   0    5.80    1.50
   9  17   0    9.10    2.20
  -9  17   0    7.80    2.10
   9  17   0    9.00    2.60
   9  17   0    7.80    1.70
  10 -17   0   -0.10    0.90
  10 -17   0   -0.10    0.90
  10  17   0    2.90    1.60
  10  17   0    1.10    1.40
  10  17   0    0.10    1.10
  11 -17   0   21.90    3.20
  11 -17   0   21.50    3.50
  11  17   0   17.70    3.40
  11  17   0   23.30    3.30
  11  17   0   23.30    3.50
  12 -17   0   39.20    3.90
  12 -17   0   40.20    4.50
  12  17   0   41.60    3.90
  12  17   0   41.60    4.40
  12  17   0   40.70    4.40
  13 -17   0   14.40    2.90
  13 -17   0   18.90    3.60
  13  17   0   13.70    2.70
  13  17   0   17.30    3.00
  13  17   0   22.40    3.50
   0 -18   0    2.30    0.90
   0  18   0    1.90    0.80
   0  18   0    1.70    1.10
  -1 -18   0    0.80    0.60
   1 -18   0    2.40    0.80
   1  18   0    1.90    0.80
   1  18   0    0.60    1.10
  -1  18   0    1.50    0.70
   1  18   0   -1.30    0.70
  -1  18   0    0.10    0.80
   2 -18   0   26.60    2.30
   2  18   0   27.30    1.80
   2  18   0   28.60    2.40
  -2  18   0   25.50    1.90
  -2  18   0   25.80    3.80
   2  18   0   26.10    3.70
   3 -18   0    7.40    1.50
  -3  18   0    8.90    2.10
  -3  18   0    6.70    1.20
   3  18   0    9.40    2.20
   3  18   0    8.10    1.40
   4 -18   0   25.30    2.30
  -4  18   0   24.10    1.80
  -4  18   0   28.60    4.00
   4  18   0   25.90    2.40
   4  18   0   26.40    3.60
   5 -18   0    0.50    0.90
   5  18   0    1.20    1.00
   5  18   0    1.30    0.90
  -5  18   0   -1.40    0.80
  -5  18   0    0.50    0.50
   6 -18   0   -1.40    0.90
  -6  18   0    1.30    1.20
  -6  18   0    1.60    0.60
   6  18   0    0.60    1.20
   6  18   0    2.20    1.00
   7 -18   0   15.90    3.00
   7 -18   0   13.00    2.20
   7  18   0   16.80    3.00
  -7  18   0   15.20    2.80
   7  18   0   10.90    2.10
   7  18   0   15.00    2.60
  -7  18   0   12.60    1.10
   8 -18   0    7.80    1.90
   8 -18   0    6.40    1.90
  -8  18   0    5.70    1.80
   8  18   0    8.80    2.30
   8  18   0    6.60    1.90
   8  18   0    5.90    1.70
   9 -18   0   43.40    4.30
   9 -18   0   38.10    3.50
  -9  18   0   37.20    4.20
   9  18   0   32.20    3.80
   9  18   0   35.40    3.40
   9  18   0   32.00    4.40
  10 -18   0   47.60    4.60
  10 -18   0   46.50    4.00
  10  18   0   56.39    4.40
  10  18   0   37.60    4.20
  10  18   0   41.50    4.50
  11 -18   0   13.40    2.90
  11 -18   0   13.20    2.40
  11  18   0   14.30    2.70
  11  18   0   13.30    2.60
  11  18   0   16.90    3.00
  12 -18   0    4.40    1.80
  12  18   0    1.60    1.50
  12  18   0    3.30    1.40
  13 -18   0    9.30    2.40
  13 -18   0   10.50    2.60
  13  18   0    7.90    2.10
  13  18   0    7.10    2.20
  13  18   0    4.80    2.00
   0 -19   0    0.40    0.70
   0  19   0    2.50    1.10
   0  19   0    1.00    0.70
   1 -19   0    1.40    0.70
  -1 -19   0    1.30    0.60
   1  19   0    1.30    0.80
  -1  19   0    3.10    0.80
  -1  19   0    0.30    0.70
   1  19   0    0.40    1.00
   1  19   0    1.00    0.90
   2 -19   0   53.69    3.70
  -2  19   0   52.79    4.80
  -2  19   0   58.29    3.40
   2  19   0   56.89    3.80
   2  19   0   56.99    4.80
   2  19   0   52.79    3.20
   3 -19   0   43.70    3.40
  -3  19   0   51.19    3.10
  -3  19   0   48.80    4.50
   3  19   0   49.40    4.50
   3  19   0   53.59    3.60
   4 -19   0   63.09    4.30
  -4  19   0   60.59    5.30
   4  19   0   64.59    5.30
   4  19   0   64.79    4.40
  -4  19   0   69.49    4.20
   5 -19   0    0.70    0.70
  -5  19   0    2.80    1.50
  -5  19   0   -0.20    0.50
   6 -19   0   11.00    2.00
   6  19   0   10.00    2.00
   6  19   0   10.40    2.20
  -6  19   0    9.60    2.40
  -6  19   0    8.60    1.00
   7 -19   0    6.80    1.80
   7 -19   0    8.70    2.20
  -7  19   0    5.30    2.10
   7  19   0    7.60    2.10
   7  19   0    7.20    1.70
   7  19   0    7.40    2.10
  -7  19   0    7.10    0.80
   8 -19   0   27.80    4.00
   8 -19   0   25.50    2.90
  -8  19   0   27.30    3.90
   8  19   0   32.80    4.30
   8  19   0   26.80    3.00
   9 -19   0    2.60    1.30
   9 -19   0    3.90    1.70
   9  19   0    6.10    1.80
   9  19   0    6.10    2.00
  -9  19   0    2.90    1.80
   9  19   0    4.80    1.80
  10 -19   0   -0.70    1.00
  10 -19   0    1.30    1.20
  10  19   0    1.10    1.20
  10  19   0    3.20    1.60
  10  19   0    2.00    1.30
  11 -19   0    1.00    1.40
  11 -19   0    2.60    1.40
  11  19   0    3.60    1.80
  11  19   0    2.30    1.30
  11  19   0    0.30    1.30
  12 -19   0    7.00    1.90
  12  19   0    9.70    2.20
  12  19   0   13.90    2.80
  12  19   0    9.80    2.20
   0 -20   0  182.28    9.90
   0  20   0  194.98   11.70
   0  20   0  204.78   10.10
   1 -20   0   30.10    2.40
   1  20   0   26.20    2.30
   1  20   0   25.30    2.20
   1  20   0   27.20    3.80
  -1  20   0   30.20    2.30
  -1  20   0   31.00    4.30
   2 -20   0    1.60    0.90
   2  20   0   -0.90    0.80
   2  20   0    0.50    0.70
  -2  20   0    2.20    0.80
  -2  20   0    0.40    1.20
   3 -20   0    0.20    0.70
   3  20   0    0.50    1.10
  -3  20   0    0.10    0.50
   3  20   0   -0.20    0.70
  -3  20   0    0.10    1.20
   4 -20   0    4.70    1.40
   4  20   0    5.20    1.40
   4  20   0    4.50    2.00
  -4  20   0    4.60    0.90
  -4  20   0    1.50    1.60
   5 -20   0    4.10    1.30
   5  20   0    5.40    1.70
  -5  20   0    3.90    1.80
  -5  20   0    3.30    0.70
   5  20   0    2.40    1.20
   6 -20   0    1.90    1.10
   6  20   0    1.80    1.50
  -6  20   0    2.10    0.60
  -6  20   0    3.10    1.70
   6  20   0    2.10    1.10
   7 -20   0    3.70    1.40
   7 -20   0    1.70    1.30
  -7  20   0    1.80    1.70
   7  20   0    5.00    1.30
  -7  20   0    1.90    0.50
   7  20   0    1.90    1.50
   8 -20   0    7.90    1.90
   8 -20   0    3.60    1.50
   8  20   0    7.30    1.80
   8  20   0    7.50    2.30
   8  20   0    5.80    1.90
  -8  20   0   11.40    2.50
   9 -20   0    3.00    1.30
   9 -20   0    2.70    1.50
   9  20   0    1.80    1.30
   9  20   0    0.70    1.20
   9  20   0    1.80    1.70
  -9  20   0    4.30    1.90
  10 -20   0    4.10    1.50
  10 -20   0    6.30    2.20
  10  20   0    2.50    1.70
  10  20   0    5.20    1.70
  10  20   0    4.70    2.00
  11 -20   0    0.20    1.00
  11 -20   0   -1.10    1.20
  11  20   0    0.50    1.60
  11  20   0    0.40    1.50
  11  20   0    0.40    1.20
  12 -20   0    2.00    1.40
  12 -20   0    3.70    2.00
  12  20   0    1.20    1.50
  12  20   0    2.40    2.30
  12  20   0    1.30    2.10
   0 -21   0   -0.20    0.70
   0  21   0    0.20    0.90
   0  21   0    0.60    0.70
   1 -21   0   15.90    2.10
   1  21   0   11.50    2.80
  -1  21   0   13.60    1.80
   1  21   0   13.70    2.00
  -1  21   0   12.10    2.60
   2 -21   0   -0.10    0.80
   2  21   0    0.90    0.80
  -2  21   0    2.30    1.30
  -2  21   0    0.40    0.70
   3 -21   0    3.40    1.20
   3  21   0    2.60    1.40
   3  21   0    6.10    1.40
  -3  21   0    5.30    1.90
  -3  21   0    5.30    1.10
   4 -21   0   50.39    3.90
   4  21   0   50.09    4.80
  -4  21   0   50.69    4.90
  -4  21   0   51.39    3.10
   4  21   0   52.59    4.30
   5  21   0   14.60    2.20
  -5  21   0    9.10    2.50
  -5  21   0   14.00    1.40
   5  21   0   16.70    3.10
   6 -21   0    3.10    1.30
   6  21   0    4.50    1.90
  -6  21   0    7.60    2.10
   6  21   0    7.20    1.70
  -6  21   0    4.90    0.80
   7 -21   0   28.80    3.10
   7 -21   0   33.10    4.50
   7  21   0   26.30    2.90
   7  21   0   30.20    4.20
   8 -21   0    1.60    1.20
   8 -21   0    1.70    1.00
   8  21   0    2.10    1.60
   8  21   0    2.70    1.20
  -8  21   0    2.30    1.70
   9 -21   0    2.50    1.20
   9 -21   0    2.90    1.40
   9  21   0    0.00    0.90
   9  21   0    3.30    1.50
  -9  21   0   -3.00    1.50
   9  21   0   -1.00    1.40
  10 -21   0    1.00    1.30
  10 -21   0    3.70    1.50
  10  21   0    1.30    1.50
  10  21   0    3.50    1.90
  10  21   0    0.50    1.60
  11 -21   0   10.70    3.00
  11  21   0    8.80    2.60
  11  21   0    8.00    2.20
  11  21   0   18.50    2.90
  12 -21   0   24.70    3.60
  12 -21   0   29.70    4.50
  12  21   0   33.10    3.60
  12  21   0   17.80    5.00
  12  21   0   27.50    3.80
   0 -22   0    7.40    1.50
   0  22   0    6.70    1.30
   0  22   0    7.50    2.50
   1 -22   0    0.80    0.90
   1  22   0    1.90    1.20
   1  22   0    1.50    0.80
  -1  22   0    2.20    0.80
   2 -22   0    0.30    0.60
  -2  22   0    0.80    0.70
   2  22   0   -0.80    1.00
   2  22   0    0.60    0.80
   3 -22   0   98.59    6.30
   3  22   0  110.49    6.60
   3  22   0  101.99    7.70
  -3  22   0  102.59    5.60
   4 -22   0   10.80    2.00
   4  22   0   11.90    2.00
   4  22   0    9.30    2.30
  -4  22   0   11.30    1.50
   5 -22   0    8.30    1.90
  -5  22   0   11.00    3.10
   5  22   0    7.00    2.20
   5  22   0    8.70    1.80
   6 -22   0    5.00    1.40
  -6  22   0    4.20    0.80
   6  22   0    7.20    2.30
   6  22   0    4.20    1.30
  -6  22   0    8.50    2.50
   7 -22   0    9.00    2.40
   7 -22   0    6.10    1.60
   7  22   0    6.10    2.10
   7  22   0    5.00    1.60
  -7  22   0    8.60    2.50
   8 -22   0   60.09    5.40
   8 -22   0   57.49    4.60
   8  22   0   65.29    5.80
   8  22   0   59.09    4.80
  -8  22   0   65.39    5.70
   9 -22   0   41.00    5.50
   9 -22   0   33.10    3.60
  -9  22   0   37.60    5.10
   9  22   0   37.50    4.20
   9  22   0   39.10    3.80
  10 -22   0   59.39    4.90
  10 -22   0   59.79    5.70
  10  22   0   64.49    5.30
  10  22   0   51.99    5.50
  10  22   0   69.39    5.50
 -10  22   0   47.90    5.30
  11 -22   0   31.50    4.70
  11 -22   0   28.10    3.90
  11  22   0   35.60    4.80
  11  22   0   32.40    3.60
  11  22   0   33.00    5.30
   0 -23   0    1.10    0.70
   0  23   0    0.60    1.30
   0  23   0    0.00    0.70
   1 -23   0    0.30    0.80
   1  23   0    1.60    0.90
  -1  23   0    0.60    1.00
   1  23   0    1.90    1.30
  -1  23   0    0.60    0.60
   2 -23   0    8.80    1.70
  -2  23   0   10.90    2.60
  -2  23   0    9.30    1.40
   2  23   0    8.90    2.60
   2  23   0    7.80    1.50
   3 -23   0    0.40    0.70
  -3  23   0    0.30    1.10
  -3  23   0    0.60    0.60
   3  23   0    1.20    0.90
   3  23   0    0.30    1.20
  -4  23   0   70.49    3.90
   4  23   0   63.99    4.50
   4  23   0   66.79    5.90
  -4  23   0   52.09    5.50
   5 -23   0   22.40    2.60
  -5  23   0   26.80    4.20
   5  23   0   18.80    3.50
   5  23   0   21.50    2.40
  -5  23   0   23.50    1.80
   6 -23   0   51.39    4.30
   6  23   0   55.49    5.60
  -6  23   0   58.49    3.10
  -6  23   0   55.59    5.40
   6  23   0   54.19    4.40
   7 -23   0  132.69    9.00
   7 -23   0  139.69    8.10
  -7  23   0  116.49    8.90
   7  23   0  117.99    9.10
   7  23   0  127.69    8.00
   8 -23   0   39.80    5.30
   8 -23   0   39.90    3.70
   8  23   0   42.30    4.80
  -8  23   0   31.80    4.60
   8  23   0   30.90    3.50
   9 -23   0    4.70    1.80
   9 -23   0    2.60    1.40
  -9  23   0    2.30    1.80
   9  23   0    5.80    2.00
   9  23   0    3.00    1.80
  10 -23   0   -0.10    2.60
  10  23   0   -0.20    1.00
  10  23   0    1.50    1.60
 -10  23   0    1.00    2.00
  11 -23   0   15.60    3.00
  11 -23   0   15.90    2.90
  11  23   0   16.00    3.00
  11  23   0   11.60    3.00
   0 -24   0   19.40    2.00
   0  24   0   20.40    3.60
   0  24   0   19.70    2.00
   1 -24   0    1.30    0.90
  -1  24   0    0.10    0.70
  -1  24   0   -0.20    1.20
   1  24   0    1.70    0.80
   1  24   0   -0.80    1.10
   2 -24   0    1.50    1.00
   2  24   0    1.40    1.20
  -2  24   0    1.10    0.80
  -2  24   0   -1.80    1.10
   2  24   0    2.30    1.40
   3 -24   0   51.59    3.90
   3  24   0   48.00    3.80
  -3  24   0   52.89    3.30
  -3  24   0   42.60    4.80
   3  24   0   55.99    5.40
   4 -24   0   32.70    3.20
   4  24   0   36.70    5.30
   4  24   0   40.10    3.40
  -4  24   0   40.80    5.30
  -4  24   0   39.30    2.60
   5 -24   0    3.80    1.40
   5  24   0    2.90    1.70
  -5  24   0    4.40    2.10
  -5  24   0    6.00    1.00
   5  24   0    3.70    1.40
   6 -24   0   35.10    3.40
  -6  24   0   34.70    2.20
  -6  24   0   38.20    4.40
   6  24   0   33.80    4.90
   6  24   0   38.00    3.40
   7 -24   0    1.70    1.30
   7 -24   0    3.20    1.60
   7  24   0    0.90    1.20
  -7  24   0   -0.10    1.50
   7  24   0    0.90    1.50
   8 -24   0   37.10    3.60
   8 -24   0   35.70    5.10
   8  24   0   36.40    5.30
  -8  24   0   44.40    4.60
   8  24   0   34.60    3.60
   9 -24   0   29.00    4.40
   9 -24   0   24.70    3.60
  -9  24   0   14.90    3.30
   9  24   0   21.40    3.50
   9  24   0   22.40    4.00
  10 -24   0   44.70    6.00
  10 -24   0   33.30    4.10
 -10  24   0   54.79    5.30
  10  24   0   56.69    4.90
  10  24   0   42.80    5.90
   0 -25   0    0.00    0.80
   0  25   0    0.80    0.70
   0  25   0    2.80    1.60
   1 -25   0   13.80    2.00
   1  25   0   15.30    2.40
  -1  25   0   14.70    2.00
   1  25   0   14.60    3.20
  -1  25   0   16.50    3.50
   2 -25   0   21.80    2.80
   2  25   0   16.50    3.40
  -2  25   0   21.00    2.00
  -2  25   0   20.50    3.80
   2  25   0   19.30    2.60
   3 -25   0    7.10    1.60
   3  25   0    5.90    1.40
   3  25   0    8.00    2.50
  -3  25   0   10.00    2.80
  -3  25   0    7.20    1.30
   4 -25   0   18.70    2.60
   4  25   0   13.40    2.30
  -4  25   0   14.30    1.60
  -4  25   0   12.20    3.00
   4  25   0   16.60    3.40
   5 -25   0    2.80    1.10
  -5  25   0    0.30    0.70
   5  25   0    1.10    1.10
  -5  25   0    0.20    1.80
   5  25   0    1.40    1.30
   6 -25   0   10.80    2.20
   6  25   0    9.70    2.10
  -6  25   0   13.80    3.20
  -6  25   0    9.70    1.10
   6  25   0    9.80    2.50
   7 -25   0   39.60    3.90
   7 -25   0   43.10    4.80
   7  25   0   50.29    4.20
  -7  25   0   45.20    5.10
   7  25   0   34.30    5.10
   8 -25   0    2.60    1.60
   8 -25   0    1.10    1.20
   8  25   0    0.40    1.10
  -8  25   0   -2.90    1.70
   8  25   0    3.80    2.00
   9 -25   0    2.80    1.90
   9 -25   0    1.70    1.40
  -9  25   0    1.70    1.90
   9  25   0    0.30    1.40
   0 -26   0    0.80    0.90
   0  26   0   -2.70    1.30
   0  26   0    1.00    1.00
   1 -26   0    5.70    1.50
   1  26   0    6.70    2.30
  -1  26   0    6.60    1.40
   1  26   0    2.80    1.10
  -1  26   0    5.20    2.20
   2 -26   0    0.60    1.00
   2  26   0    2.80    0.90
  -2  26   0    0.90    1.50
   2  26   0    0.30    1.10
  -2  26   0    1.40    0.80
   3 -26   0    7.30    2.10
  -3  26   0    8.50    1.30
   3  26   0    7.00    1.70
  -3  26   0    8.30    2.60
   3  26   0    6.70    2.40
   4 -26   0   -0.60    0.70
  -4  26   0    0.70    1.70
   4  26   0    0.00    0.90
  -4  26   0   -0.60    0.70
   4  26   0    1.90    1.70
   5 -26   0    3.10    1.30
  -5  26   0    2.10    0.90
  -5  26   0    6.40    2.50
   5  26   0    2.70    1.20
   5  26   0    3.10    1.80
   6 -26   0   10.20    2.10
   6  26   0   13.00    2.40
  -6  26   0   13.30    3.30
   6  26   0    9.40    2.90
   7 -26   0    1.60    1.20
   7 -26   0    1.40    1.40
   7  26   0   -0.50    1.30
  -7  26   0    1.50    1.80
   7  26   0   -0.10    1.30
   8 -26   0   15.50    2.80
   8 -26   0   20.40    6.10
  -8  26   0   14.90    3.30
   9 -26   0    0.60    1.30
   9 -26   0    1.00    1.40
   9  26   0    2.50    1.50
  -9  26   0    2.20    1.90
   9  26   0    0.50    1.80
   0  27   0   -2.20    1.00
   0  27   0   -0.80    0.70
   1 -27   0   14.40    2.20
  -1  27   0   11.50    1.90
   1  27   0   11.40    3.30
  -1  27   0    9.50    2.70
   1  27   0   14.50    2.10
   2 -27   0   15.10    2.30
  -2  27   0    9.50    2.60
   2  27   0    8.70    2.70
   2  27   0   19.90    2.50
  -2  27   0   17.50    2.20
   3 -27   0    1.70    1.20
  -3  27   0    1.80    1.00
   3  27   0    2.30    1.30
   3  27   0    2.20    1.10
  -3  27   0    4.30    1.90
   4 -27   0    2.70    1.40
  -4  27   0    6.50    2.10
   4  27   0    1.30    1.10
   4  27   0   -1.10    1.50
   5 -27   0   15.10    2.50
  -5  27   0   11.90    3.10
   5  27   0    9.60    2.10
   5  27   0   10.80    3.10
  -5  27   0   14.60    1.60
   6 -27   0   15.40    2.70
   6  27   0   13.10    2.80
  -6  27   0   10.60    2.80
   6  27   0   12.90    2.40
   7 -27   0    7.00    1.90
  -7  27   0   10.80    3.00
   7  27   0    6.90    1.90
   8 -27   0    7.70    2.30
   8 -27   0    8.90    2.30
   8  27   0    9.60    3.00
  -8  27   0    0.60    2.20
   8  27   0    4.50    1.70
   0  28   0   21.40    2.20
   0  28   0   18.00    3.90
   1 -28   0    2.50    1.10
   1  28   0    0.80    1.00
   1  28   0    2.30    1.50
  -1  28   0    1.70    1.70
  -1  28   0    0.20    1.10
   2 -28   0   15.20    2.60
   2  28   0   14.40    3.40
  -2  28   0   11.20    2.90
   2  28   0   10.80    2.00
  -2  28   0   13.40    1.90
   3 -28   0    0.10    1.10
   3  28   0    2.60    1.70
  -3  28   0    3.90    2.10
  -3  28   0    1.70    1.00
   3  28   0    2.10    1.30
   4 -28   0    9.80    2.10
   4  28   0    8.00    1.80
   4  28   0    7.70    2.50
  -4  28   0    8.10    1.40
  -4  28   0    9.50    2.80
   5 -28   0   36.30    3.50
  -5  28   0   33.30    5.00
   5  28   0   30.20    5.20
   5  28   0   28.30    3.20
   6 -28   0    5.90    1.70
  -6  28   0    7.90    2.20
   6  28   0    1.60    3.20
   6  28   0    2.90    1.70
   7 -28   0    3.10    1.60
   7 -28   0    4.60    1.90
  -7  28   0    6.10    2.20
   7  28   0    3.50    2.20
   7  28   0   -0.60    1.30
   0  29   0    1.90    1.00
   0  29   0    1.40    1.50
   1 -29   0   27.50    2.90
   1  29   0   29.30    5.00
  -1  29   0   23.70    4.30
   1  29   0   30.20    2.90
  -1  29   0   34.00    2.80
   2 -29   0    0.30    1.10
  -2  29   0    2.20    1.10
   2  29   0    1.40    0.90
  -2  29   0    3.60    2.20
   2  29   0    0.60    1.60
   3 -29   0    3.80    1.40
  -3  29   0    2.20    1.20
   3  29   0    1.40    1.60
  -3  29   0    0.60    1.90
   3  29   0    0.30    1.10
   4 -29   0    1.90    1.20
  -4  29   0    1.90    2.20
   4  29   0    2.80    1.20
  -4  29   0    0.70    1.00
   4  29   0   -0.40    2.10
   5 -29   0   35.50    3.70
   5  29   0   34.00    3.60
   5  29   0   44.20    5.10
  -5  29   0   43.60    5.80
   6 -29   0   34.90    3.70
  -6  29   0   21.60    4.20
   6  29   0   25.60    4.40
   0  30   0   23.90    4.50
   0  30   0   20.20    2.60
   1  30   0    1.70    2.20
  -1  30   0    3.30    1.20
   1  30   0    1.90    1.10
  -1  30   0    4.30    2.10
   2 -30   0   29.40    3.10
   2  30   0   32.60    3.20
  -2  30   0   33.10    5.20
   2  30   0   37.30    7.00
   3 -30   0    2.00    1.20
  -3  30   0   -1.30    1.80
  -3  30   0   -0.60    1.00
   3  30   0   -0.90    1.80
   3  30   0    2.80    1.30
   4 -30   0   35.90    4.30
  -4  30   0   36.90    5.50
   4  30   0   41.30    5.90
   4  30   0   28.80    3.20
   5 -30   0   19.60    3.10
   5  30   0   21.20    4.30
   5  30   0   18.30    3.00
  -5  30   0   17.70    3.80
   0  31   0    1.20    1.20
   0  31   0   -2.60    1.60
  -1  31   0   19.70    2.50
  -1  31   0   10.90    4.10
   1  31   0   13.90    3.50
   1  31   0   16.90    2.50
   2 -31   0   14.10    2.30
  -2  31   0   17.00    2.20
   2  31   0   16.40    3.90
   2  31   0   15.00    2.40
   3 -31   0    3.90    1.60
   3  31   0    3.70    1.50
  -3  31   0    4.40    1.20
   3  31   0    9.80    2.90
  16   0  -1   -2.90    1.50
  16   0  -1   -1.60    1.30
  16   0  -1   -2.30    1.50
  15   0  -1    0.40    1.40
  15   0  -1   -1.10    1.20
  15   0  -1    1.50    1.20
  14   0  -1    0.20    0.90
  14   0  -1    1.40    1.50
  14   0  -1   -0.10    1.00
  13   0  -1    0.00    0.80
  13   0  -1    0.20    1.00
  13   0  -1    0.10    1.20
  12   0  -1   -1.20    0.90
  12   0  -1    0.90    0.80
  12   0  -1    0.80    1.00
  11   0  -1    0.60    1.10
  11   0  -1    0.70    0.90
  10   0  -1   -0.70    0.60
  10   0  -1   -0.10    0.80
   9   0  -1   -0.40    0.80
   9   0  -1   -0.20    0.60
   8   0  -1    1.80    0.90
   8   0  -1    0.60    0.50
   7   0  -1   -0.30    0.60
   7   0  -1    0.00    0.50
  -6   0   1    0.40    0.40
   6   0  -1    0.40    0.40
   6   0  -1   -0.60    0.40
  -6   0   1   -0.10    0.50
   5   0  -1    0.20    0.40
  -5   0   1    0.20    0.30
  -5   0   1    0.30    0.40
  -5   0   1    0.20    0.50
   5   0  -1   -0.40    0.40
  -4   0   1    0.20    0.30
  -4   0   1    0.30    0.40
   4   0  -1    0.50    0.40
  -4   0   1    0.50    0.40
   4   0  -1    0.30    0.40
  -3   0   1   -0.40    0.30
  -3   0   1    0.10    0.30
   3   0  -1   -0.40    0.30
   3   0  -1   -0.20    0.20
  -3   0   1   -0.20    0.30
  -2   0   1    0.00    0.20
  -2   0   1   -0.20    0.10
   2   0  -1    0.20    0.10
   2   0  -1    0.20    0.20
   2   0  -1    0.60    0.30
   1   0  -1    0.20    0.10
   1   0  -1    0.10    0.10
   1   0   1    0.00    0.20
  -1   0  -1    0.00    0.10
   1   0   1    0.10    0.10
  -1   0  -1    0.20    0.20
  -1   0  -1    0.00    0.20
   1   0   1    0.10    0.20
   2   0   1   -0.10    0.30
   2   0   1    0.60    0.30
  -2   0  -1    0.30    0.30
   2   0   1    0.30    0.30
  -2   0  -1    0.60    0.30
  -2   0  -1    0.30    0.30
  -3   0  -1   -0.10    0.30
   3   0   1    0.70    0.50
  -3   0  -1    0.60    0.30
   3   0   1    0.20    0.30
  -3   0  -1    0.00    0.30
   3   0   1    0.00    0.30
  -4   0  -1    0.50    0.40
   4   0   1    0.00    0.40
   4   0   1    0.40    0.50
  -4   0  -1    0.20    0.40
   4   0   1    0.20    0.40
  -5   0  -1    0.10    0.30
  -5   0  -1    0.10    0.40
   5   0   1    0.20    0.80
   5   0   1   -0.10    0.40
   5   0   1    0.60    0.50
  -5   0  -1    0.10    0.40
   6   0   1   -0.70    0.60
   6   0   1    0.40    0.50
  -6   0  -1   -0.10    0.50
   7   0   1   -0.20    0.40
   7   0   1   -0.30    0.60
   7   0   1    0.30    0.50
   8   0   1   -0.60    0.70
   8   0   1    0.50    0.60
   8   0   1    0.80    0.60
   9   0   1    0.10    0.70
   9   0   1   -0.40    0.80
  10   0   1    0.30    1.00
  10   0   1    1.70    1.00
  11   0   1   -0.40    0.90
  11   0   1   -0.50    0.90
  12   0   1   -0.40    1.00
  12   0   1   -0.80    0.90
  13   0   1    2.00    1.30
  13   0   1   -0.70    1.10
  14   0   1    0.50    1.20
  14   0   1    0.50    1.40
  14   0   1    1.30    1.40
  15   0   1   -2.40    1.40
  15   0   1   -1.00    1.40
  15   0   1    0.50    1.50
  16  -1  -1    0.60    1.50
  16  -1  -1    0.10    1.50
  16   1  -1    1.90    1.60
  16   1  -1   -0.20    1.40
  16   1  -1    2.00    1.70
  15  -1  -1   26.40    2.90
  15  -1  -1   20.00    3.50
  15  -1  -1   23.50    2.60
  15   1  -1   29.00    2.90
  15   1  -1   16.30    3.50
  15   1  -1   24.30    2.80
  14  -1  -1    6.30    1.40
  14  -1  -1    3.90    1.30
  14  -1  -1    6.30    2.00
  14   1  -1    4.10    1.40
  14   1  -1    4.20    1.20
  14   1  -1    5.40    1.90
  13  -1  -1    4.60    1.50
  13  -1  -1    6.40    2.10
  13  -1  -1    5.00    1.30
  13   1  -1    9.50    2.20
  13   1  -1    5.50    1.40
  13   1  -1    5.10    1.50
  12  -1  -1    6.40    2.40
  12  -1  -1    3.50    1.40
  12   1  -1    5.50    1.40
  12   1  -1    4.00    1.60
  12   1  -1    5.30    1.20
  11  -1  -1   18.80    2.20
  11  -1  -1   13.00    2.40
  11   1  -1   18.50    3.10
  11   1  -1   17.90    2.10
  11   1  -1   17.20    1.90
  10  -1  -1   17.80    2.00
  10  -1  -1   23.10    2.50
  10   1  -1   21.00    1.90
  10   1  -1   19.80    2.90
  10   1  -1   16.10    1.80
   9  -1  -1   30.30    2.90
   9  -1  -1   31.70    2.50
   9   1  -1   32.00    2.50
   9   1  -1   24.20    2.70
   8  -1  -1  146.09    8.20
   8  -1  -1  144.89    7.50
   8   1  -1  125.89    7.30
   8   1  -1  145.89    8.10
   7  -1  -1   85.99    5.00
   7  -1  -1  103.99    5.80
   7   1  -1   97.89    5.60
   7   1  -1   81.39    4.90
  -6  -1   1   41.70    3.20
  -6  -1   1   43.40    2.60
   6  -1  -1   39.00    2.90
   6  -1  -1   28.30    2.60
  -6   1   1   42.80    2.90
   6   1  -1   43.30    3.60
  -6   1   1   35.70    2.40
  -5  -1   1    0.20    0.50
   5  -1  -1    0.20    0.40
   5  -1  -1    0.10    0.50
  -5  -1   1    0.00    0.40
  -5  -1   1    1.00    0.40
   5   1  -1    0.30    0.50
   5   1  -1    0.20    0.40
  -5   1   1    0.20    0.40
  -5   1   1    0.60    0.50
  -4  -1   1   30.40    2.00
  -4  -1   1   29.70    2.00
  -4  -1   1   34.10    2.30
   4  -1  -1   36.90    2.10
   4  -1  -1   35.90    2.30
  -4   1   1   32.60    2.10
   4   1  -1   33.20    2.30
   4   1  -1   34.80    2.00
  -4   1   1   35.20    2.00
  -3  -1   1    1.90    0.50
  -3  -1   1    1.20    0.40
  -3  -1   1    1.20    0.40
   3  -1  -1    1.40    0.50
   3  -1  -1    0.70    0.50
   3   1  -1    1.90    0.40
  -3   1   1    0.70    0.40
   3   1  -1    1.60    0.50
   3   1  -1    0.80    0.40
  -3   1   1    1.00    0.50
  -2  -1   1    7.40    0.50
   2  -1  -1    7.60    0.60
  -2  -1   1    6.60    0.60
  -2  -1   1    7.70    0.70
  -2  -1   1    7.00    0.50
   2  -1  -1    8.10    0.70
  -2   1   1    6.80    0.60
   2   1  -1    7.30    0.60
  -2   1   1    7.30    0.70
   2   1  -1    7.50    0.50
   2   1  -1    8.10    0.80
   1  -1  -1    1.20    0.20
   1  -1  -1    0.90    0.20
   1   1  -1    1.10    0.30
   1   1  -1    1.20    0.20
  -1   1   1    1.00    0.10
   0  -1   1    2.50    0.40
   0   1  -1    1.90    0.30
   0   1   1    1.80    0.30
   1  -1   1    0.80    0.20
   1  -1   1    0.10    0.30
  -1  -1  -1    0.10    0.20
  -1  -1  -1    0.60    0.20
   1  -1   1    0.40    0.30
  -1   1  -1    0.50    0.10
   1   1   1    0.20    0.10
  -1   1  -1    0.50    0.20
   1   1   1    1.00    0.30
   1   1   1    0.60    0.20
   2  -1   1  226.38   10.90
  -2  -1  -1  255.77   10.90
   2  -1   1  222.48   10.70
  -2  -1  -1  220.78   10.90
  -2  -1  -1  228.28   10.90
   2  -1   1  226.58   10.90
  -2   1  -1  233.98   10.70
   2   1   1  230.68   10.90
  -2   1  -1  230.78   11.00
   2   1   1  220.08   10.80
   2   1   1  227.18   10.90
   3  -1   1   10.10    1.00
   3  -1   1    8.90    1.00
  -3  -1  -1    8.90    0.90
  -3  -1  -1    9.50    0.80
   3  -1   1    8.20    0.70
  -3  -1  -1    9.20    0.90
  -3   1  -1    7.80    1.00
   3   1   1    7.70    0.80
   3   1   1    9.90    1.00
  -3   1  -1    9.60    0.90
  -3   1  -1    9.10    0.80
   3   1   1    8.10    0.90
  -4  -1  -1  103.49    5.40
   4  -1   1   97.69    5.40
  -4  -1  -1  104.99    5.20
   4  -1   1  101.29    5.40
   4  -1   1   97.49    5.00
   4   1   1  102.29    5.10
  -4   1  -1   92.19    5.00
   4   1   1   98.09    5.30
  -4   1  -1   97.59    5.40
   4   1   1  100.09    5.40
  -4   1  -1  103.89    5.40
  -5  -1  -1  161.78    8.40
  -5  -1  -1  171.48    8.50
  -5  -1  -1  153.88    8.10
   5  -1   1  167.18    8.60
   5  -1   1  163.58    8.50
   5  -1   1  161.78    8.10
   5   1   1  177.18    8.40
   5   1   1  153.48    8.50
   5   1   1  166.78    8.20
  -5   1  -1  161.08    8.50
   6  -1   1  132.09    7.40
   6  -1   1  139.19    7.30
   6  -1   1  135.59    6.80
   6   1   1  135.19    6.90
  -6   1  -1  120.89    6.70
   6   1   1  134.39    7.20
   6   1   1  138.09    7.80
   7  -1   1    0.60    0.80
   7  -1   1    0.30    0.60
   7  -1   1    0.00    0.50
   7   1   1    0.20    0.50
   7   1   1    1.00    0.60
   7   1   1    1.50    0.80
   8  -1   1    1.20    0.70
   8  -1   1   -0.20    0.70
   8   1   1    0.60    0.70
   8   1   1   -0.70    0.80
   8   1   1   -0.30    0.40
   9  -1   1   31.30    2.80
   9  -1   1   34.60    3.20
   9   1   1   31.90    3.00
   9   1   1   29.60    2.50
   9   1   1   31.70    2.80
  10  -1   1    7.10    1.70
  10  -1   1    8.80    2.00
  10   1   1    5.70    1.40
  10   1   1    8.00    1.70
  11  -1   1   10.40    2.20
  11   1   1    5.60    1.60
  11   1   1    8.90    1.80
  12  -1   1   26.10    3.70
  12  -1   1   25.70    2.70
  12   1   1   23.80    3.40
  12   1   1   16.40    2.50
  13  -1   1    3.90    1.30
  13  -1   1    3.80    1.80
  13   1   1    3.60    1.70
  13   1   1    3.40    1.40
  14  -1   1    2.90    1.50
  14  -1   1    3.10    1.60
  14   1   1    0.10    1.30
  14   1   1    1.30    1.20
  14   1   1   -1.70    1.10
  15  -1   1    3.80    1.70
  15  -1   1    3.50    1.70
  15  -1   1    6.60    1.90
  15   1   1   -0.70    1.40
  15   1   1    0.10    1.60
  15   1   1    1.50    1.40
  16  -2  -1   11.10    2.70
  16  -2  -1   11.60    2.30
  16  -2  -1   10.30    2.40
  16   2  -1    5.40    1.90
  16   2  -1   10.90    2.80
  16   2  -1   12.60    2.50
  15  -2  -1    2.90    1.30
  15  -2  -1    1.40    1.50
  15  -2  -1    3.10    1.40
  15   2  -1    2.80    1.50
  15   2  -1    3.80    1.70
  15   2  -1    5.80    1.70
  14  -2  -1    5.30    1.70
  14  -2  -1    4.50    1.20
  14  -2  -1    5.80    2.10
  14   2  -1    3.30    1.70
  14   2  -1    7.10    1.60
  14   2  -1    5.00    1.40
  13  -2  -1   32.10    4.40
  13  -2  -1   37.60    3.30
  13   2  -1   32.20    2.90
  13   2  -1   38.00    3.90
  13   2  -1   38.90    3.70
  12  -2  -1   99.29    6.40
  12  -2  -1  115.49    7.50
  12   2  -1  105.39    6.20
  12   2  -1  100.59    6.20
  12   2  -1  102.19    7.30
  11  -2  -1  185.38   10.80
  11  -2  -1  192.48    9.80
  11   2  -1  175.28    9.50
  11   2  -1  173.78   10.60
  11   2  -1  171.78    9.50
  10  -2  -1   73.49    4.40
  10  -2  -1   64.09    4.90
  10   2  -1   65.59    4.10
  10   2  -1   62.99    4.90
  10   2  -1   59.89    4.00
   9  -2  -1   38.90    2.80
   9  -2  -1   34.90    3.20
   9   2  -1   32.20    2.50
   9   2  -1   35.60    2.60
   9   2  -1   32.90    3.20
   8  -2  -1    3.50    1.00
   8  -2  -1    2.40    0.90
   8  -2  -1    1.20    0.70
   8   2  -1    1.40    0.80
   8   2  -1    2.30    0.90
   8   2  -1    1.70    0.80
   7  -2  -1   64.99    4.00
   7  -2  -1   72.79    4.50
   7  -2  -1   63.19    4.00
   7   2  -1   58.49    3.70
   7   2  -1   65.89    4.40
   7   2  -1   71.79    3.90
   6  -2  -1  431.66   22.40
  -6  -2   1  473.85   22.40
   6  -2  -1  495.25   22.60
   6  -2  -1  474.65   23.00
   6   2  -1  492.65   22.60
   6   2  -1  461.75   22.40
  -6   2   1  497.95   22.40
   6   2  -1  466.65   23.40
  -5  -2   1  207.68    9.70
   5  -2  -1  166.28    9.60
   5  -2  -1  204.38   10.20
  -5  -2   1  193.78   10.10
   5  -2  -1  211.88    9.80
  -5  -2   1  196.88    9.70
   5   2  -1  195.58   10.10
  -5   2   1  184.08    9.80
   5   2  -1  209.88    9.70
  -5   2   1  211.58    9.70
   5   2  -1  203.38    9.80
  -5   2   1  197.48   10.10
   4  -2  -1  275.17   12.50
   4  -2  -1  256.47   12.50
  -4  -2   1  269.17   13.10
  -4  -2   1  267.17   12.50
  -4  -2   1  259.67   12.40
   4  -2  -1  258.07   12.80
   4   2  -1  238.68   12.30
   4   2  -1  255.47   12.60
   4   2  -1  267.67   12.50
  -4   2   1  277.17   13.10
  -4   2   1  256.47   12.60
   4   2  -1  266.37   12.90
  -3  -2   1   96.69    4.80
  -3  -2   1   94.79    5.00
   3  -2  -1  109.69    4.90
   3  -2  -1   97.69    4.70
   3  -2  -1   98.39    5.10
   3   2  -1   89.69    5.00
   3   2  -1   95.59    4.90
  -3   2   1   97.69    4.80
   3   2  -1   91.69    4.80
  -3   2   1   87.79    5.00
   3   2  -1   93.59    4.60
  -2  -2   1    0.30    0.10
   2  -2  -1    0.20    0.30
  -2  -2   1    0.20    0.30
   2  -2  -1    0.60    0.20
   2  -2  -1    0.40    0.30
  -2  -2   1    0.00    0.20
  -2  -2   1    0.40    0.20
  -2   2   1    0.30    0.20
   2   2  -1    0.30    0.20
  -2   2   1    0.30    0.30
   2   2  -1    0.00    0.20
  -2   2   1    0.20    0.30
   2   2  -1    0.20    0.20
   2   2  -1    0.30    0.30
  -1  -2   1    2.50    0.50
   1  -2  -1    2.60    0.30
   1  -2  -1    2.30    0.30
  -1  -2   1    2.10    0.40
   1  -2  -1    2.70    0.40
   1  -2  -1    2.30    0.40
  -1  -2   1    2.30    0.30
  -1   2   1    2.10    0.30
   1   2  -1    2.40    0.30
  -1   2   1    2.90    0.40
   1   2  -1    2.00    0.40
   1   2  -1    2.60    0.40
  -1   2   1    2.60    0.40
   0  -2   1    1.10    0.30
   0  -2  -1    1.10    0.30
   0  -2   1    0.60    0.30
   0   2  -1    0.90    0.30
   0   2   1    0.90    0.20
   0   2  -1    0.90    0.20
  -1  -2  -1    2.30    0.40
   1  -2   1    2.00    0.20
   1  -2   1    3.00    0.60
  -1  -2  -1    2.50    0.40
   1  -2   1    2.30    0.40
  -1   2  -1    2.50    0.40
  -1   2  -1    2.00    0.20
   1   2   1    2.60    0.40
  -1   2  -1    2.30    0.50
   1   2   1    3.00    0.50
   2  -2   1  341.07   16.50
  -2  -2  -1  368.16   16.40
   2  -2   1  350.86   16.70
   2  -2   1  358.26   16.50
  -2  -2  -1  351.86   16.40
   2  -2   1  341.77   16.20
  -2  -2  -1  342.67   16.40
  -2   2  -1  357.66   16.60
  -2   2  -1  352.96   16.20
   2   2   1  347.37   16.40
   2   2   1  348.07   16.40
   2   2   1  348.87   16.40
  -3  -2  -1   14.80    1.20
   3  -2   1   12.60    0.90
   3  -2   1   15.00    1.30
  -3  -2  -1   13.50    1.20
  -3  -2  -1   13.50    1.10
   3  -2   1   14.30    1.20
   3  -2   1   13.40    1.30
  -3   2  -1   12.40    0.90
  -3   2  -1   14.70    1.20
   3   2   1   15.30    1.20
   3   2   1   12.50    1.10
   3   2   1   11.80    1.00
  -4  -2  -1   22.50    1.70
   4  -2   1   21.90    1.50
  -4  -2  -1   22.30    1.70
  -4  -2  -1   23.80    1.70
   4  -2   1   23.20    1.90
   4  -2   1   23.90    1.90
  -4   2  -1   22.60    1.50
   4   2   1   23.30    1.80
   4   2   1   24.80    1.70
   4   2   1   25.90    1.80
  -4   2  -1   23.50    1.80
  -5  -2  -1    0.20    0.40
   5  -2   1   -0.30    0.60
  -5  -2  -1    1.00    0.40
   5  -2   1   -0.30    0.30
   5  -2   1    0.00    0.30
  -5  -2  -1    0.30    0.40
   5  -2   1    0.30    0.50
   5   2   1   -0.20    0.40
  -5   2  -1   -0.30    0.30
   5   2   1   -0.10    0.50
  -5   2  -1    0.20    0.50
   5   2   1    0.60    0.40
   6  -2   1   25.10    2.20
   6  -2   1   24.60    2.20
   6   2   1   24.40    2.10
   6   2   1   24.80    1.90
  -6   2  -1   26.80    1.80
   7  -2   1  206.08   11.20
   7  -2   1  227.28   11.00
   7   2   1  196.88   10.70
   7   2   1  214.78   11.20
   7   2   1  209.58   10.60
   8  -2   1  238.38   11.50
   8  -2   1  209.58   11.80
   8   2   1  220.98   11.20
   8   2   1  226.18   11.80
   8   2   1  204.78   11.20
   9  -2   1    9.70    1.70
   9  -2   1   14.30    2.40
   9   2   1    9.60    1.60
   9   2   1    9.40    1.60
   9   2   1   14.60    2.30
  10  -2   1   23.10    3.20
  10  -2   1   21.70    2.30
  10   2   1   20.50    3.00
  10   2   1   16.50    2.30
  11  -2   1    1.00    1.20
  11  -2   1    2.00    1.30
  11   2   1    2.10    1.30
  11   2   1    2.00    1.20
  12  -2   1    7.50    1.90
  12  -2   1    8.70    2.20
  12   2   1    5.40    1.80
  12   2   1   10.70    1.90
  12   2   1    7.60    1.80
  13  -2   1   62.09    4.60
  13  -2   1   52.39    5.10
  13   2   1   56.29    5.20
  13   2   1   64.99    4.50
  13   2   1   57.09    4.70
  14  -2   1   55.59    4.40
  14  -2   1   44.50    4.80
  14   2   1   49.20    4.00
  14   2   1   49.40    4.80
  14   2   1   49.99    4.10
  15  -2   1   25.30    4.00
  15  -2   1   26.60    3.20
  15  -2   1   27.90    3.10
  15   2   1   26.30    3.30
  15   2   1   29.10    3.20
  15   2   1   29.30    4.00
  16  -3  -1   14.40    2.60
  16  -3  -1   19.90    3.00
  16  -3  -1   24.10    4.20
  16   3  -1   21.90    3.00
  16   3  -1   20.90    3.40
  16   3  -1   25.40    3.30
  15  -3  -1  113.09    7.30
  15  -3  -1  104.19    6.60
  15  -3  -1  104.89    8.20
  15   3  -1  117.39    6.90
  15   3  -1  116.99    8.50
  14  -3  -1   47.20    4.80
  14  -3  -1   44.40    3.40
  14  -3  -1   46.30    4.00
  14   3  -1   37.40    3.50
  14   3  -1   48.20    4.70
  14   3  -1   45.10    3.50
  13  -3  -1   92.39    7.00
  13  -3  -1  103.09    6.30
  13   3  -1   84.49    5.80
  13   3  -1   91.79    6.90
  13   3  -1   92.19    6.10
  12  -3  -1   27.80    2.90
  12  -3  -1   32.20    3.50
  12   3  -1   26.40    3.90
  12   3  -1   29.90    2.80
  12   3  -1   31.50    2.70
  11  -3  -1   66.09    4.50
  11  -3  -1   72.19    5.40
  11   3  -1   60.79    4.20
  11   3  -1   68.39    5.30
  11   3  -1   63.19    4.30
  10  -3  -1   28.90    2.60
  10  -3  -1   32.40    3.20
  10   3  -1   26.90    2.30
  10   3  -1   32.10    2.60
  10   3  -1   32.30    3.10
   9  -3  -1  267.77   13.00
   9  -3  -1  254.77   13.80
   9   3  -1  249.97   12.70
   9   3  -1  250.37   12.80
   9   3  -1  256.17   13.70
   8  -3  -1  432.86   21.30
   8  -3  -1  435.06   20.70
   8  -3  -1  462.55   20.70
   8   3  -1  390.56   20.20
   8   3  -1  422.06   20.50
   8   3  -1  414.86   21.20
   7  -3  -1  228.28   12.00
   7  -3  -1  245.78   12.40
  -7  -3   1  239.48   11.90
   7  -3  -1  255.97   12.70
  -7   3   1  249.97   12.10
   7   3  -1  234.58   12.10
   7   3  -1  247.38   12.60
   7   3  -1  222.98   11.70
   7   3  -1  255.17   12.00
  -6  -3   1   63.99    3.70
   6  -3  -1   56.89    3.60
   6  -3  -1   59.39    3.50
   6  -3  -1   60.39    4.00
   6   3  -1   51.39    3.30
   6   3  -1   60.69    3.50
   6   3  -1   57.69    4.20
  -6   3   1   66.49    3.50
   6   3  -1   59.79    3.60
  -5  -3   1    2.70    0.60
   5  -3  -1    3.10    0.80
  -5  -3   1    3.10    0.70
   5  -3  -1    2.90    0.60
  -5  -3   1    1.40    0.60
   5  -3  -1    2.40    0.70
   5   3  -1    1.70    0.60
  -5   3   1    2.10    0.60
   5   3  -1    2.80    0.80
   5   3  -1    3.00    0.60
  -5   3   1    2.60    0.70
   5   3  -1    4.30    1.00
  -5   3   1    2.90    0.70
  -4  -3   1  456.25   20.40
   4  -3  -1  478.25   20.50
  -4  -3   1  419.56   20.20
   4  -3  -1  441.36   20.80
   4  -3  -1  456.95   20.40
   4   3  -1  393.26   20.40
  -4   3   1  453.05   20.70
   4   3  -1  375.76   20.10
   4   3  -1  445.26   20.80
   4   3  -1  430.56   20.40
   3  -3  -1   65.99    3.70
  -3  -3   1   65.99    3.50
   3  -3  -1   69.19    3.40
   3  -3  -1   72.89    3.50
  -3  -3   1   64.79    3.70
  -3  -3   1   63.29    3.40
  -3  -3   1   60.09    3.20
  -3   3   1   75.39    3.50
   3   3  -1   57.89    3.20
  -3   3   1   67.39    3.40
   3   3  -1   62.79    3.70
  -3   3   1   64.39    3.60
   3   3  -1   62.99    3.50
   3   3  -1   63.59    3.50
   2  -3  -1  151.98    7.10
   2  -3  -1  153.98    7.00
  -2  -3   1  146.29    7.30
   2  -3  -1  139.39    7.20
  -2  -3   1  136.69    7.10
  -2  -3   1  141.99    7.00
  -2   3   1  154.78    7.00
  -2   3   1  156.98    7.10
   2   3  -1  140.09    7.10
   2   3  -1  146.49    7.10
   2   3  -1  144.09    7.30
   1  -3  -1    4.00    0.50
  -1  -3   1    3.60    0.30
  -1  -3   1    3.90    0.60
  -1  -3   1    3.50    0.60
   1  -3  -1    3.10    0.40
  -1  -3   1    3.70    0.40
   1  -3  -1    4.00    0.50
   1   3  -1    3.70    0.60
  -1   3   1    3.40    0.50
   1   3  -1    2.90    0.40
  -1   3   1    2.80    0.50
  -1   3   1    3.80    0.50
   1   3  -1    3.00    0.60
   0  -3   1    2.40    0.40
   0  -3   1    1.70    0.50
   0  -3   1    2.40    0.20
   0  -3  -1    3.30    0.50
   0  -3  -1    3.00    0.50
   0   3   1    2.50    0.40
   0   3   1    2.80    0.40
   0   3  -1    3.00    0.50
   0   3   1    2.50    0.40
   0   3  -1    2.40    0.30
   0   3  -1    2.40    0.40
   1  -3   1   51.29    2.70
  -1  -3  -1   50.39    2.70
  -1  -3  -1   47.30    2.60
   1  -3   1   47.00    2.90
   1   3   1   50.59    2.60
  -1   3  -1   49.60    2.70
   1   3   1   51.49    2.70
   1   3   1   53.49    2.70
  -1   3  -1   49.40    2.90
   2  -3   1  175.98    8.40
  -2  -3  -1  183.68    8.30
  -2  -3  -1  162.28    8.20
   2  -3   1  166.08    8.50
  -2   3  -1  169.38    8.50
  -2   3  -1  163.78    7.90
  -2   3  -1  165.98    8.30
   2   3   1  163.48    8.20
   2   3   1  169.88    8.30
   2   3   1  183.68    8.30
  -3  -3  -1   20.70    1.50
   3  -3   1   16.80    1.50
  -3  -3  -1   22.20    1.50
   3  -3   1   19.90    1.70
  -3  -3  -1   19.10    1.40
   3  -3   1   20.30    1.60
  -3   3  -1   18.90    1.20
   3   3   1   20.20    1.40
   3   3   1   22.60    1.60
  -3   3  -1   22.00    1.80
   3   3   1   20.70    1.40
  -4  -3  -1  245.78   12.10
   4  -3   1  267.67   12.90
   4  -3   1  253.87   12.40
  -4  -3  -1  243.18   12.10
  -4  -3  -1  240.18   12.30
   4  -3   1  278.27   12.50
  -4   3  -1  242.38   12.40
   4   3   1  243.28   12.10
   4   3   1  257.57   12.10
   4   3   1  261.07   12.40
  -4   3  -1  233.08   11.80
   5  -3   1  177.88    8.50
   5  -3   1  161.48    8.50
  -5  -3  -1  151.78    8.10
  -5  -3  -1  153.38    8.30
   5  -3   1  168.48    8.60
  -5   3  -1  150.38    7.80
   5   3   1  160.28    8.40
   5   3   1  155.98    8.10
   5   3   1  168.08    8.10
   6  -3   1  125.49    6.80
   6  -3   1  125.49    7.00
   6   3   1  128.39    6.50
  -6   3  -1  118.09    6.20
   6   3   1  118.09    6.50
   7  -3   1   22.20    2.20
   7  -3   1   20.40    2.20
  -7   3  -1   23.50    1.80
   7   3   1   24.40    2.00
   7   3   1   21.90    2.20
   7   3   1   20.40    2.10
   8  -3   1    5.90    1.40
   8  -3   1    4.30    1.40
   8   3   1    3.10    1.10
   8   3   1    3.80    1.20
   8   3   1    3.90    1.10
   9  -3   1   62.89    4.70
   9  -3   1   68.69    4.40
   9   3   1   64.99    4.70
   9   3   1   64.29    4.10
   9   3   1   56.89    4.10
  10  -3   1  148.99    9.10
  10   3   1  142.09    8.90
  10   3   1  148.99    8.30
  10   3   1  153.28    8.20
  11  -3   1  195.68   10.50
  11  -3   1  201.08   12.00
  11   3   1  191.68   10.30
  11   3   1  195.38   10.60
  11   3   1  181.98   11.20
  12  -3   1   79.39    5.20
  12  -3   1   69.79    5.70
  12   3   1   69.79    5.60
  12   3   1   69.09    5.00
  13  -3   1   22.30    2.70
  13  -3   1   19.60    3.40
  13   3   1   16.60    3.00
  13   3   1   23.20    2.50
  13   3   1   16.30    2.50
  14  -3   1    0.90    1.30
  14  -3   1    3.00    1.70
  14   3   1    2.90    1.30
  14   3   1   -1.10    1.20
  14   3   1    5.60    2.20
  15  -3   1    3.60    1.60
  15  -3   1    8.20    2.30
  15   3   1    3.60    1.60
  15   3   1    7.60    2.10
  15   3   1    0.90    1.60
  16  -4  -1   29.90    3.40
  16  -4  -1   26.30    3.10
  16   4  -1   25.80    4.00
  16   4  -1   22.70    3.20
  16   4  -1   30.40    3.20
  15  -4  -1   -0.70    1.20
  15  -4  -1    1.40    1.30
  15  -4  -1   -0.60    1.30
  15   4  -1    2.00    1.30
  15   4  -1    1.10    1.40
  15   4  -1    0.00    1.40
  14  -4  -1    6.90    2.00
  14  -4  -1    8.40    1.90
  14   4  -1    6.10    1.70
  14   4  -1    6.70    1.70
  14   4  -1    9.00    2.40
  13  -4  -1   48.60    3.90
  13  -4  -1   51.59    4.80
  13   4  -1   39.00    4.30
  13   4  -1   45.00    3.50
  13   4  -1   45.50    3.70
  12  -4  -1  228.18   13.00
  12  -4  -1  223.58   11.90
  12   4  -1  227.38   12.90
  12   4  -1  217.88   11.40
  12   4  -1  211.18   11.70
  11  -4  -1  302.97   14.90
  11  -4  -1  289.17   15.90
  11   4  -1  289.87   14.50
  11   4  -1  285.57   14.80
  11   4  -1  281.77   15.70
  10  -4  -1   34.60    3.40
  10  -4  -1   34.10    2.80
  10   4  -1   32.90    3.30
  10   4  -1   32.90    2.60
  10   4  -1   32.20    2.70
   9  -4  -1   27.40    2.80
   9  -4  -1   27.90    2.40
   9   4  -1   22.40    2.10
   9   4  -1   23.60    2.60
   9   4  -1   25.90    2.10
   8  -4  -1   13.20    1.60
   8  -4  -1   12.10    1.90
   8  -4  -1   14.10    1.60
   8   4  -1   12.60    2.00
   8   4  -1   12.40    1.70
   8   4  -1   12.30    1.40
   8   4  -1   14.10    1.50
   7  -4  -1  108.29    5.90
   7  -4  -1  102.59    6.30
   7  -4  -1  102.59    5.90
  -7  -4   1  107.79    5.70
   7   4  -1  110.39    5.80
   7   4  -1  105.39    5.90
   7   4  -1  106.59    6.30
   7   4  -1   97.49    5.50
  -7   4   1  109.79    5.60
   6  -4  -1   48.90    3.40
   6  -4  -1   60.79    3.60
  -6  -4   1   58.09    3.30
   6  -4  -1   63.99    4.00
   6   4  -1   61.59    3.90
   6   4  -1   49.20    3.10
   6   4  -1   61.79    3.60
   6   4  -1   59.69    3.60
  -6   4   1   65.49    3.40
   5  -4  -1   85.99    5.20
  -5  -4   1   95.89    5.30
   5  -4  -1   93.39    5.30
  -5  -4   1   92.69    5.10
  -5  -4   1   96.49    4.80
   5  -4  -1   93.39    5.00
   5   4  -1   90.39    5.30
   5   4  -1   83.39    4.60
   5   4  -1   92.99    5.30
  -5   4   1  107.39    5.40
   5   4  -1   88.29    5.00
  -4  -4   1   51.19    2.90
  -4  -4   1   51.89    2.70
   4  -4  -1   53.79    3.00
  -4  -4   1   50.89    3.20
   4  -4  -1   56.59    3.00
   4  -4  -1   54.49    3.30
   4   4  -1   45.80    2.60
   4   4  -1   49.30    3.20
   4   4  -1   50.79    3.00
  -4   4   1   55.19    3.00
   4   4  -1   46.20    3.00
  -4   4   1   57.19    3.10
   3  -4  -1  126.69    6.10
   3  -4  -1  120.69    6.30
  -3  -4   1  125.69    6.40
  -3  -4   1  118.89    6.10
   3  -4  -1  132.59    6.10
  -3  -4   1  100.09    5.90
   3   4  -1  133.69    6.40
   3   4  -1  121.59    6.20
  -3   4   1  129.79    6.10
  -3   4   1  124.39    6.10
   3   4  -1  102.69    6.00
  -2  -4   1  161.98    8.70
  -2  -4   1  176.88    8.80
   2  -4  -1  187.88    8.60
  -2  -4   1  177.38    8.50
   2  -4  -1  183.78    8.60
  -2   4   1  185.58    8.50
   2   4  -1  175.08    8.80
   2   4  -1  173.88    8.60
  -2   4   1  183.68    8.60
  -2   4   1  186.68    8.70
   2   4  -1  174.28    8.80
   1  -4  -1   26.50    1.60
   1  -4  -1   26.00    1.60
  -1  -4   1   22.70    1.70
  -1  -4   1   25.40    1.70
  -1  -4   1   26.10    1.40
   1  -4  -1   27.20    1.60
  -1   4   1   27.50    1.60
  -1   4   1   25.80    1.60
   1   4  -1   26.00    1.50
   1   4  -1   25.30    1.30
   1   4  -1   26.80    1.80
  -1   4   1   25.60    1.50
   1   4  -1   26.20    1.80
   0  -4   1   91.59    5.00
   0  -4   1   98.29    4.60
   0  -4  -1   93.09    4.70
   0  -4  -1   94.09    4.70
   0  -4   1   99.79    4.50
   0   4  -1   94.09    4.60
   0   4   1   89.89    4.60
   0   4  -1   97.59    4.50
   0   4   1   95.09    4.80
   0   4  -1   92.69    5.00
   1  -4   1    4.00    0.70
   1  -4   1    4.40    0.80
  -1  -4  -1    3.20    0.60
  -1  -4  -1    3.50    0.60
   1   4   1    3.90    0.70
  -1   4  -1    3.10    0.70
   1   4   1    3.40    0.60
  -1   4  -1    4.00    0.70
   1   4   1    2.80    0.60
   2  -4   1   67.59    3.90
   2  -4   1   76.59    3.80
  -2  -4  -1   66.09    3.60
  -2  -4  -1   72.59    3.70
   2   4   1   68.89    3.70
  -2   4  -1   69.79    3.90
   2   4   1   62.59    3.70
   2   4   1   67.99    3.60
   2   4   1   65.39    3.50
  -2   4  -1   67.59    3.70
   3  -4   1    2.50    0.70
  -3  -4  -1    2.30    0.60
   3  -4   1    1.90    0.70
   3  -4   1    2.60    0.70
  -3  -4  -1    2.20    0.50
  -3   4  -1    1.90    0.60
   3   4   1    2.40    0.50
   3   4   1    2.20    0.60
  -3   4  -1    1.70    0.70
   3   4   1    2.10    0.60
  -3   4  -1    2.20    0.30
  -4  -4  -1    1.10    0.60
  -4  -4  -1    1.10    0.50
  -4  -4  -1    1.40    0.60
   4  -4   1    1.80    0.60
   4  -4   1    1.30    0.70
  -4   4  -1    0.70    0.50
   4   4   1    0.00    0.40
  -4   4  -1    1.10    0.30
   4   4   1    1.40    0.60
   5  -4   1  147.89    8.30
  -5  -4  -1  152.08    7.60
   5  -4   1  151.48    7.90
  -5  -4  -1  149.88    7.80
   5  -4   1  150.18    8.00
   5   4   1  142.79    7.50
  -5   4  -1  142.59    7.20
   5   4   1  144.19    7.80
   5   4   1  151.08    7.50
   6  -4   1   19.30    1.90
  -6  -4  -1   18.80    1.80
   6  -4   1   20.20    2.00
   6   4   1   22.70    3.00
   6   4   1   20.60    1.80
   6   4   1   19.80    2.00
   7  -4   1  218.18   11.40
   7  -4   1  219.38   11.00
  -7   4  -1  203.18   10.30
   7   4   1  214.38   11.20
   7   4   1  212.38   10.80
   7   4   1  204.18   10.70
   8  -4   1  201.08    9.70
   8  -4   1  173.28   10.00
   8   4   1  180.48    9.50
   8   4   1  167.08    9.80
   8   4   1  173.18    9.30
   9  -4   1   57.09    4.30
   9  -4   1   54.19    3.80
   9   4   1   55.09    3.70
   9   4   1   49.60    3.60
   9   4   1   50.19    4.00
  10  -4   1   53.79    4.60
  10  -4   1   59.79    4.20
  10   4   1   57.09    4.00
  10   4   1   59.29    4.60
  10   4   1   53.49    3.80
  10   4   1   54.79    4.00
  11  -4   1   25.30    2.70
  11   4   1   25.80    2.90
  11   4   1   21.40    2.30
  11   4   1   21.90    2.50
  12  -4   1   67.09    4.70
  12  -4   1   67.49    5.50
  12   4   1   56.29    4.50
  12   4   1   65.59    5.20
  12   4   1   62.69    4.50
  13  -4   1   45.40    4.70
  13  -4   1   47.20    4.00
  13   4   1   45.50    3.60
  13   4   1   42.70    4.50
  13   4   1   43.00    3.90
  14  -4   1   54.59    5.10
  14   4   1   58.79    4.10
  14   4   1   48.00    4.30
  14   4   1   46.80    5.00
  15  -4   1   65.69    6.00
  15   4   1   70.29    6.10
  15   4   1   69.89    5.00
  15   4   1   72.99    5.30
  16  -5  -1    9.90    1.80
  16   5  -1    8.90    2.10
  16   5  -1    5.40    2.00
  16   5  -1   10.20    2.00
  15  -5  -1   55.19    4.50
  15  -5  -1   42.50    4.90
  15   5  -1   47.80    4.20
  15   5  -1   49.80    3.80
  15   5  -1   51.49    5.00
  14  -5  -1   13.00    2.80
  14  -5  -1   13.80    2.40
  14   5  -1   11.20    2.70
  14   5  -1   11.70    1.90
  14   5  -1   13.30    2.20
  13  -5  -1    8.00    2.00
  13  -5  -1   11.10    2.40
  13   5  -1    6.30    1.70
  13   5  -1    8.60    1.40
  13   5  -1    9.70    2.30
  12  -5  -1   27.60    2.90
  12  -5  -1   33.90    3.60
  12   5  -1   29.60    2.60
  12   5  -1   29.40    3.40
  12   5  -1   27.70    2.80
  11  -5  -1   27.40    3.80
  11   5  -1   26.60    2.50
  11   5  -1   26.20    3.50
  11   5  -1   30.10    2.40
  10  -5  -1   29.10    2.60
  10  -5  -1   29.40    3.00
  10   5  -1   25.20    2.90
  10   5  -1   25.90    2.40
  10   5  -1   28.60    2.30
   9  -5  -1   64.69    3.90
   9  -5  -1   56.89    4.30
   9   5  -1   49.70    3.30
   9   5  -1   56.59    3.90
   9   5  -1   51.69    3.70
   9   5  -1   50.49    4.20
   8  -5  -1  181.78    9.90
   8  -5  -1  198.28   10.70
   8  -5  -1  187.98   10.00
   8   5  -1  193.08   10.00
   8   5  -1  190.78    9.50
   8   5  -1  185.38   10.50
   8   5  -1  203.38   10.00
  -7  -5   1  159.68    7.70
   7  -5  -1  150.18    8.50
   7  -5  -1  151.88    7.90
   7  -5  -1  158.88    8.00
   7   5  -1  133.29    7.40
   7   5  -1  154.48    8.00
   7   5  -1  151.38    8.00
   7   5  -1  141.99    8.40
  -7   5   1  152.98    7.60
   6  -5  -1    5.70    1.10
  -6  -5   1    4.30    0.80
   6  -5  -1    5.00    1.10
   6  -5  -1    4.60    1.10
   6   5  -1    4.50    1.10
   6   5  -1    3.20    0.60
   6   5  -1    5.10    1.10
  -6   5   1    4.30    0.80
   6   5  -1    4.40    1.00
  -5  -5   1   76.39    3.80
  -5  -5   1   70.59    4.40
   5  -5  -1   77.59    4.20
   5  -5  -1   75.69    4.20
   5   5  -1   64.59    3.70
   5   5  -1   78.19    4.20
   5   5  -1   71.39    4.20
   5   5  -1   75.39    4.50
  -4  -5   1   82.69    4.90
   4  -5  -1   89.09    4.90
  -4  -5   1   83.29    4.60
  -4  -5   1   87.89    4.20
   4  -5  -1   92.99    4.70
   4  -5  -1   88.29    4.60
   4   5  -1   79.09    4.20
   4   5  -1   84.29    4.90
   4   5  -1   86.19    4.70
   4   5  -1   85.89    4.70
  -4   5   1   93.89    4.70
  -4   5   1   85.09    4.60
   3  -5  -1  193.28    9.10
  -3  -5   1  181.08    9.30
  -3  -5   1  185.18    9.10
   3  -5  -1  198.28    9.00
  -3  -5   1  185.98    9.10
   3  -5  -1  190.48    9.30
  -3   5   1  196.78    9.10
   3   5  -1  173.48    9.20
  -3   5   1  193.38    9.20
   3   5  -1  182.68    9.30
   3   5  -1  153.38    8.90
   2  -5  -1    2.10    0.50
  -2  -5   1    2.10    0.50
   2  -5  -1    3.10    0.60
  -2  -5   1    1.50    0.50
  -2  -5   1    2.20    0.60
   2   5  -1    1.80    0.60
  -2   5   1    2.00    0.50
  -2   5   1    1.70    0.40
  -2   5   1    3.00    0.50
   2   5  -1    2.50    0.50
   2   5  -1    1.20    0.50
  -1  -5   1  315.47   14.70
   1  -5  -1  311.57   14.90
  -1  -5   1  309.27   15.10
  -1  -5   1  300.37   14.60
   1  -5  -1  314.67   14.80
  -1  -5   1  311.57   15.10
   1  -5  -1  321.37   14.90
  -1   5   1  329.07   14.80
  -1   5   1  320.17   15.00
   1   5  -1  321.57   14.60
  -1   5   1  313.77   14.70
   1   5  -1  312.87   15.20
   1   5  -1  316.97   15.10
   1   5  -1  318.27   14.70
   0  -5  -1    6.70    0.80
   0  -5  -1    6.70    0.80
   0  -5   1    8.10    0.80
   0  -5   1    7.20    0.60
   0  -5   1    9.20    1.20
   0  -5  -1    6.80    0.70
   0   5  -1    7.60    0.80
   0   5   1    6.50    0.70
   0   5   1    7.00    0.90
   0   5  -1    8.40    1.10
   0   5   1    6.20    0.80
   0   5  -1    9.10    0.60
   1  -5   1    5.40    0.40
   1  -5   1    7.30    0.90
   1  -5   1    6.20    1.00
  -1  -5  -1    5.00    0.80
  -1  -5  -1    4.50    0.80
  -1  -5  -1    6.80    0.90
   1   5   1    5.40    0.90
   1   5   1    6.60    0.90
  -1   5  -1    6.30    1.00
   1   5   1    5.50    0.90
  -1   5  -1    5.60    0.40
  -1   5  -1    5.70    0.90
   2  -5   1   67.49    3.40
  -2  -5  -1   60.09    3.40
  -2  -5  -1   55.59    3.30
   2  -5   1   56.29    3.50
   2   5   1   56.09    3.30
   2   5   1   59.29    3.30
  -2   5  -1   55.29    3.30
   2   5   1   60.89    3.40
  -2   5  -1   60.49    3.60
  -3  -5  -1  204.78   10.00
  -3  -5  -1  196.18   10.10
   3  -5   1  204.58   10.70
   3  -5   1  232.08   10.30
   3   5   1  193.58    9.80
  -3   5  -1  200.88   10.40
   3   5   1  212.98   10.00
   3   5   1  212.48   10.20
   3   5   1  212.88   10.20
  -3   5  -1  199.78    9.50
  -3   5  -1  185.38   10.10
   4  -5   1  158.18    8.30
   4  -5   1  154.88    8.00
   4  -5   1  154.38    8.20
   4   5   1  150.08    8.00
  -4   5  -1  145.29    7.40
  -4   5  -1  157.28    8.30
   4   5   1  166.98    7.70
   4   5   1  162.48    8.10
   4   5   1  150.58    8.00
   5  -5   1   12.10    1.80
   5  -5   1   12.20    1.70
  -5  -5  -1    9.40    1.40
   5  -5   1   10.30    1.50
   5   5   1   11.60    1.30
  -5   5  -1    8.70    0.80
   5   5   1   10.40    1.40
   5   5   1    9.90    1.20
   5   5   1   11.00    1.50
   6  -5   1  116.19    5.90
  -6  -5  -1   95.09    5.50
   6  -5   1  106.09    6.10
  -6   5  -1   91.79    5.00
   6   5   1   99.29    5.60
   6   5   1  104.59    5.50
   6   5   1   94.69    5.80
   6   5   1   97.79    5.70
   7  -5   1    2.30    0.90
   7  -5   1    1.80    1.00
   7   5   1    4.00    1.00
   7   5   1    4.40    1.10
   7   5   1    1.90    0.80
  -7   5  -1    1.90    0.60
   7   5   1    3.80    1.00
   8  -5   1   19.30    2.80
   8  -5   1   16.80    1.90
   8   5   1   15.50    2.20
   8   5   1   13.20    1.80
   8   5   1   13.50    1.90
   8   5   1   14.00    2.00
   9  -5   1    5.90    1.60
   9  -5   1    5.10    1.30
   9   5   1    5.50    1.40
   9   5   1    4.30    1.20
   9   5   1    8.10    1.60
   9   5   1    6.50    1.40
  10  -5   1   24.40    3.40
  10   5   1   21.90    2.30
  10   5   1   19.10    2.30
  10   5   1   20.00    2.10
  10   5   1   26.90    3.50
  11  -5   1  148.59    9.50
  11   5   1  148.69    8.70
  11   5   1  155.98    8.30
  11   5   1  147.29    8.70
  11   5   1  155.48    9.40
  12  -5   1   39.10    3.90
  12  -5   1   35.20    3.30
  12   5   1   30.20    4.10
  12   5   1   28.60    3.40
  12   5   1   32.70    2.90
  13  -5   1    4.30    1.80
  13  -5   1    3.30    1.50
  13   5   1    3.00    1.50
  13   5   1    4.70    1.90
  13   5   1    1.80    1.30
  14  -5   1    5.00    1.70
  14  -5   1    3.50    1.70
  14   5   1    0.90    1.50
  14   5   1    3.90    1.50
  14   5   1    2.20    1.70
  15  -5   1   -0.50    1.20
  15  -5   1    3.10    2.70
  15   5   1   -1.20    1.50
  15   5   1    0.40    1.40
  15   5   1   -1.70    1.40
  16  -6  -1    1.40    1.40
  16  -6  -1    0.50    1.60
  16  -6  -1   -0.20    1.50
  16   6  -1    1.10    1.60
  16   6  -1    0.70    1.60
  16   6  -1   -1.20    1.50
  15  -6  -1   10.20    2.50
  15  -6  -1    8.50    2.00
  15   6  -1    8.40    1.90
  15   6  -1   11.50    2.00
  15   6  -1   11.40    2.40
  14  -6  -1    4.50    1.40
  14  -6  -1    5.20    1.60
  14   6  -1    2.10    1.60
  13  -6  -1    1.00    1.20
  13  -6  -1    1.70    1.20
  13   6  -1    0.10    0.90
  13   6  -1   -0.30    0.90
  13   6  -1    1.00    1.30
  12  -6  -1   18.50    3.30
  12  -6  -1   14.30    2.10
  12   6  -1   10.90    2.00
  12   6  -1   13.70    2.60
  12   6  -1   16.50    1.80
  11  -6  -1   20.80    2.40
  11   6  -1   16.20    2.80
  11   6  -1   19.90    1.90
  11   6  -1   18.10    2.40
  10  -6  -1   19.00    2.10
  10  -6  -1   17.20    2.70
  10   6  -1   17.00    2.30
  10   6  -1   15.30    2.60
  10   6  -1   14.70    2.20
  10   6  -1   14.60    1.60
   9  -6  -1   88.19    5.20
   9  -6  -1   88.69    5.90
   9   6  -1   84.99    5.20
   9   6  -1   82.89    5.20
   9   6  -1   81.69    4.60
   9   6  -1   76.49    5.60
   8  -6  -1    0.90    0.70
   8  -6  -1    0.90    0.70
  -8  -6   1   -0.40    0.60
   8  -6  -1    0.00    0.70
   8   6  -1    0.80    0.40
   8   6  -1   -0.60    0.50
   8   6  -1    0.10    0.70
   8   6  -1   -0.10    0.50
  -7  -6   1   14.30    1.50
   7  -6  -1   17.00    1.90
   7  -6  -1   16.60    1.70
   7  -6  -1   13.80    1.60
   7   6  -1   15.40    1.30
   7   6  -1   16.10    1.70
   7   6  -1   16.80    2.30
   7   6  -1   14.60    1.60
  -7   6   1   16.90    1.40
   6  -6  -1    8.30    1.40
  -6  -6   1    7.30    1.00
   6  -6  -1    6.00    1.20
   6  -6  -1    5.00    1.10
   6   6  -1    6.00    1.20
   6   6  -1    6.10    1.30
   6   6  -1    6.00    0.80
   6   6  -1    9.40    1.50
   5  -6  -1   72.19    3.90
  -5  -6   1   67.59    3.50
   5  -6  -1   66.59    4.20
   5  -6  -1   67.69    3.90
   5   6  -1   64.69    4.20
   5   6  -1   64.59    4.00
  -5   6   1   67.19    3.90
   5   6  -1   61.89    3.30
   5   6  -1   66.69    3.90
  -4  -6   1  229.88   11.20
   4  -6  -1  252.77   11.40
   4  -6  -1  234.18   11.60
  -4  -6   1  223.38   11.60
  -4  -6   1  227.18   11.30
   4  -6  -1  238.18   11.40
   4   6  -1  220.38   11.60
  -4   6   1  228.38   11.40
   4   6  -1  240.78   11.50
   4   6  -1  197.08   11.20
  -4   6   1  250.27   11.40
   3  -6  -1  421.46   19.10
  -3  -6   1  409.16   19.80
  -3  -6   1  375.96   19.00
   3  -6  -1  415.96   19.30
  -3   6   1  437.16   19.10
   3   6  -1  379.66   19.30
  -3   6   1  412.26   19.30
   3   6  -1  408.06   19.10
  -3   6   1  399.86   19.00
   3   6  -1  391.56   19.40
   2  -6  -1    3.10    0.60
   2  -6  -1    3.10    0.60
  -2  -6   1    4.10    0.60
  -2  -6   1    3.20    0.80
  -2  -6   1    3.50    0.70
   2  -6  -1    4.50    0.70
   2   6  -1    3.30    0.60
   2   6  -1    2.50    0.70
  -2   6   1    3.80    0.60
  -2   6   1    3.40    0.60
  -2   6   1    4.40    0.80
   2   6  -1    3.20    0.80
  -1  -6   1  325.27   16.10
  -1  -6   1  323.77   15.40
  -1  -6   1  333.57   15.60
   1  -6  -1  333.47   15.70
   1  -6  -1  340.47   15.90
  -1  -6   1  336.67   16.10
   1  -6  -1  338.17   15.80
  -1   6   1  335.37   15.60
   1   6  -1  335.67   16.10
   1   6  -1  344.27   15.70
   1   6  -1  333.67   16.20
   1   6  -1  329.17   15.50
  -1   6   1  344.47   16.00
  -1   6   1  330.07   15.70
   0  -6   1   13.60    1.00
   0  -6   1   12.20    1.30
   0  -6   1   15.60    0.90
   0  -6  -1   12.30    1.00
   0  -6  -1   13.80    1.20
   0  -6  -1   13.60    1.10
   0   6  -1   15.30    1.10
   0   6  -1   13.20    1.40
   0   6   1   13.40    1.00
   0   6   1   14.80    1.30
   0   6   1   14.70    1.20
   0   6  -1   15.20    0.90
   1  -6   1    0.90    0.60
  -1  -6  -1    1.20    0.50
  -1  -6  -1    0.80    0.40
  -1  -6  -1    0.70    0.40
   1  -6   1    1.50    0.50
   1  -6   1    1.30    0.30
   1   6   1    0.40    0.40
  -1   6  -1    1.30    0.20
   1   6   1    0.40    0.40
  -1   6  -1    0.60    0.50
  -1   6  -1    1.30    0.50
   1   6   1    0.70    0.40
   1   6   1    1.50    0.40
  -2  -6  -1    7.40    1.00
  -2  -6  -1    7.80    1.00
   2  -6   1    8.50    1.20
   2  -6   1    6.90    1.20
   2   6   1    7.90    1.00
  -2   6  -1    6.10    1.10
   2   6   1    5.20    0.90
   2   6   1    8.70    1.10
   3  -6   1   11.30    1.30
  -3  -6  -1   11.70    1.10
  -3  -6  -1    9.70    1.10
   3  -6   1   12.80    1.70
   3   6   1    8.10    1.10
   3   6   1   11.50    0.90
   3   6   1   10.20    1.30
  -3   6  -1   10.60    0.70
  -3   6  -1   11.70    1.30
  -3   6  -1   10.60    1.50
   3   6   1   10.10    1.20
  -4  -6  -1  143.09    7.80
   4  -6   1  138.39    8.70
   4  -6   1  171.68    8.10
   4  -6   1  149.88    8.20
  -4   6  -1  151.48    8.20
   4   6   1  148.89    7.90
   4   6   1  157.78    7.50
  -4   6  -1  152.48    7.20
   4   6   1  147.99    8.00
   4   6   1  157.28    7.80
   5  -6   1  114.59    6.70
   5  -6   1  119.59    6.80
   5  -6   1  129.59    6.60
  -5  -6  -1  112.79    6.50
   5   6   1  124.99    6.20
  -5   6  -1  115.59    5.80
   5   6   1  107.39    6.40
   5   6   1  122.79    6.60
   5   6   1  120.69    6.40
   6  -6   1    2.20    0.80
   6  -6   1    2.20    1.00
   6   6   1    1.30    0.70
   6   6   1    2.70    0.80
   6   6   1    1.30    0.70
  -6   6  -1    2.30    0.50
   6   6   1    1.00    0.60
   7  -6   1  126.69    6.90
   7  -6   1  125.29    7.30
   7   6   1  120.89    6.80
   7   6   1  115.49    6.70
   7   6   1  119.49    7.00
  -7   6  -1  115.39    6.10
   7   6   1  124.39    6.60
   8  -6   1   20.10    2.20
   8  -6   1   18.10    2.10
   8   6   1   20.20    2.60
  -8   6  -1   15.70    1.40
   8   6   1   15.20    1.80
   8   6   1   15.90    1.70
   8   6   1   16.30    2.10
   9  -6   1   24.50    2.90
   9  -6   1   31.80    2.70
   9   6   1   30.10    2.60
   9   6   1   28.80    2.70
   9   6   1   26.50    2.40
   9   6   1   25.60    2.70
  10  -6   1    0.80    1.10
  10  -6   1    1.80    1.10
  10   6   1    1.30    0.80
  10   6   1    0.60    1.00
  10   6   1    1.00    1.00
  10   6   1    0.30    1.00
  11  -6   1   -0.40    1.00
  11  -6   1    0.70    1.20
  11   6   1   -0.70    0.90
  11   6   1    0.60    1.00
  11   6   1   -0.50    0.70
  11   6   1   -0.40    0.90
  12  -6   1    8.10    1.80
  12  -6   1    9.90    2.50
  12   6   1    8.30    2.20
  12   6   1    9.30    2.10
  12   6   1    7.00    1.40
  13  -6   1    0.10    1.30
  13  -6   1    0.70    1.20
  13   6   1    1.50    1.10
  13   6   1   -1.30    1.10
  13   6   1   -0.40    1.40
  14  -6   1    0.30    1.30
  14  -6   1   -1.20    1.40
  14   6   1   -1.00    1.50
  14   6   1    1.90    1.30
  14   6   1    1.00    1.30
  15  -6   1    8.70    2.20
  15  -6   1    6.10    2.70
  15   6   1   12.10    2.40
  15   6   1   11.00    2.40
  15   6   1    8.70    1.90
  16  -7  -1    0.80    1.50
  16  -7  -1   -2.10    1.10
  16   7  -1    0.80    1.70
  16   7  -1   -0.60    1.70
  16   7  -1    0.90    1.60
  15  -7  -1    4.10    1.60
  15  -7  -1    0.50    1.40
  15   7  -1   -3.70    1.20
  15   7  -1   -2.10    1.30
  15   7  -1    1.10    1.20
  14  -7  -1   15.90    2.50
  14  -7  -1   17.80    3.40
  14   7  -1   22.80    2.20
  14   7  -1   13.80    2.40
  14   7  -1   17.60    3.10
  13  -7  -1    1.80    1.20
  13  -7  -1    1.30    1.40
  13   7  -1    3.00    1.20
  13   7  -1    2.20    1.50
  13   7  -1    3.00    1.20
  12  -7  -1    0.30    0.90
  12  -7  -1   -1.50    0.80
  12   7  -1    0.10    1.00
  12   7  -1    0.30    0.90
  12   7  -1    0.80    1.00
  11  -7  -1   -0.90    0.80
  11  -7  -1   -0.10    0.70
  11   7  -1   -0.20    0.80
  11   7  -1    0.90    0.80
  11   7  -1    0.50    0.80
  10  -7  -1    0.50    1.00
  10  -7  -1    1.90    1.00
  10   7  -1    1.50    0.90
  10   7  -1    0.80    1.00
  10   7  -1    1.80    0.70
  10   7  -1    2.30    0.90
   9  -7  -1   53.39    3.70
   9  -7  -1   52.99    4.20
   9   7  -1   50.49    3.10
   9   7  -1   46.70    3.60
   9   7  -1   47.60    4.00
   9   7  -1   46.40    3.60
  -8  -7   1    4.40    0.90
   8  -7  -1    3.50    0.90
   8  -7  -1    3.70    1.20
   8  -7  -1    4.80    1.20
   8   7  -1    4.20    1.10
   8   7  -1    3.70    1.30
   8   7  -1    3.60    0.70
   8   7  -1    3.80    1.00
   7  -7  -1   16.20    1.70
   7  -7  -1   19.50    1.80
   7  -7  -1   16.90    2.40
  -7  -7   1   16.20    1.40
  -7   7   1   16.30    1.40
   7   7  -1   16.80    1.80
   7   7  -1   19.10    2.50
   7   7  -1   15.20    1.70
   7   7  -1   16.50    1.30
   6  -7  -1    0.80    0.70
   6  -7  -1    0.20    0.50
   6  -7  -1    1.00    0.50
  -6  -7   1    0.30    0.30
  -6   7   1    0.60    0.60
   6   7  -1    0.00    0.50
   6   7  -1    0.50    0.60
   6   7  -1    0.20    0.50
   6   7  -1    0.60    0.40
  -5  -7   1   54.29    2.90
   5  -7  -1   55.59    3.40
   5  -7  -1   56.79    3.50
   5  -7  -1   60.89    3.80
   5   7  -1   58.19    3.60
  -5   7   1   53.79    3.50
   5   7  -1   58.39    3.50
   5   7  -1   51.89    2.80
  -4  -7   1  272.17   13.90
   4  -7  -1  298.17   13.60
  -4  -7   1  273.07   13.70
   4  -7  -1  293.27   13.90
   4  -7  -1  278.57   13.70
   4   7  -1  275.67   13.90
   4   7  -1  255.17   13.80
   4   7  -1  286.07   13.60
  -4   7   1  285.47   13.70
  -4   7   1  276.57   13.40
  -3  -7   1   60.29    3.50
   3  -7  -1   68.19    3.80
   3  -7  -1   71.39    3.70
  -3  -7   1   62.29    3.70
  -3  -7   1   61.49    3.90
  -3   7   1   70.39    3.60
   3   7  -1   60.99    3.90
  -3   7   1   61.39    3.50
   3   7  -1   65.59    3.60
  -3   7   1   67.89    3.90
   3   7  -1   63.39    3.90
  -2  -7   1   98.09    5.70
   2  -7  -1   98.39    5.30
  -2  -7   1   95.19    5.00
   2  -7  -1  101.79    5.10
   2  -7  -1   97.69    5.10
  -2  -7   1   91.49    5.40
   2   7  -1   97.39    5.50
  -2   7   1  104.19    5.10
  -2   7   1  103.39    5.40
   2   7  -1  112.49    5.20
   2   7  -1   97.09    5.50
  -2   7   1  100.99    5.10
   1  -7  -1  102.19    5.40
   1  -7  -1  105.09    5.30
   1  -7  -1  105.09    5.20
  -1  -7   1  102.29    5.10
  -1  -7   1  102.79    5.00
  -1  -7   1  103.49    5.80
   1   7  -1  103.89    5.00
  -1   7   1   99.99    5.20
  -1   7   1  103.99    5.10
   1   7  -1  112.49    5.20
   1   7  -1   99.19    5.70
  -1   7   1  102.49    5.60
   0  -7  -1  233.68   11.40
   0  -7   1  240.48   11.10
   0  -7   1  238.08   11.20
   0  -7   1  231.78   12.00
   0  -7  -1  231.98   11.20
   0  -7  -1  227.18   11.50
   0   7   1  229.08   11.30
   0   7  -1  238.08   11.90
   0   7   1  238.98   11.60
   0   7   1  228.18   11.10
   0   7  -1  260.47   11.10
   0   7  -1  232.18   11.20
  -1  -7  -1  183.28    9.40
   1  -7   1  198.48    9.20
  -1  -7  -1  189.08    9.40
   1  -7   1  205.48    8.90
  -1   7  -1  189.98    9.80
  -1   7  -1  210.58    8.90
   1   7   1  177.28    9.00
   1   7   1  180.48    9.50
  -1   7  -1  168.28    9.20
   1   7   1  189.68    9.30
   2  -7   1    4.10    0.90
  -2  -7  -1    3.10    0.70
  -2  -7  -1    3.90    0.80
   2  -7   1    4.00    1.00
  -2  -7  -1    2.80    0.70
  -2   7  -1    3.60    0.90
  -2   7  -1    4.40    0.40
  -2   7  -1    4.10    1.00
   2   7   1    3.10    0.70
   2   7   1    3.50    0.80
   2   7   1    4.50    0.90
   3  -7   1  179.68    9.10
  -3  -7  -1  176.78    8.90
   3   7   1  148.99    8.80
   3   7   1  170.48    8.90
   3   7   1  182.48    8.90
  -3   7  -1  180.28    8.10
  -3   7  -1  179.08    8.90
   3   7   1  169.28    8.40
  -3   7  -1  177.48    9.20
   4  -7   1   79.59    4.30
  -4  -7  -1   67.89    4.20
   4  -7   1   67.99    4.50
   4   7   1   74.59    3.80
  -4   7  -1   68.59    4.40
   4   7   1   72.59    4.30
  -4   7  -1   71.89    3.50
   4   7   1   72.29    4.30
   4   7   1   66.79    4.10
   5  -7   1  157.78    8.70
  -5  -7  -1  147.19    8.40
   5  -7   1  187.98    8.60
  -5   7  -1  154.28    7.60
   5   7   1  156.38    8.50
   5   7   1  164.38    7.90
   5   7   1  160.18    8.30
  -5   7  -1  159.18    8.70
   5   7   1  146.89    8.40
   6  -7   1    0.10    0.50
   6  -7   1    0.90    0.80
   6   7   1    0.30    0.60
  -6   7  -1    0.30    0.30
   6   7   1    0.20    0.60
   6   7   1    0.40    0.60
   6   7   1    0.10    0.50
   7  -7   1   21.60    2.30
   7  -7   1   28.00    2.40
   7   7   1   23.70    2.10
   7   7   1   19.70    2.00
   7   7   1   23.60    2.30
  -7   7  -1   22.50    1.70
   7   7   1   25.00    2.30
   8  -7   1   77.79    4.80
   8  -7   1   80.99    5.30
   8   7   1   71.69    5.00
   8   7   1   66.49    4.30
   8   7   1   70.69    4.80
   8   7   1   78.49    4.70
  -8   7  -1   70.89    4.00
   9  -7   1    3.30    1.40
   9  -7   1    8.30    1.70
   9   7   1    5.50    1.40
   9   7   1    4.60    1.30
   9   7   1    4.20    1.30
   9   7   1    4.60    1.20
  10  -7   1   -0.20    1.00
  10  -7   1   -0.20    0.90
  10   7   1    0.10    1.00
  10   7   1    0.30    1.10
  10   7   1    0.40    0.90
  11  -7   1    1.90    1.40
  11  -7   1    0.00    1.10
  11   7   1   -0.40    0.90
  11   7   1    1.30    1.00
  11   7   1    1.10    0.90
  11   7   1   -0.90    0.70
  12  -7   1    7.00    2.10
  12  -7   1    5.90    1.60
  12   7   1    6.00    1.30
  12   7   1    8.80    2.10
  12   7   1    7.00    1.50
  12   7   1    5.60    1.40
  13  -7   1    2.00    1.30
  13  -7   1    2.50    1.40
  13   7   1    4.90    1.60
  13   7   1    4.40    1.80
  14  -7   1    7.10    1.90
  14  -7   1   11.50    2.80
  14   7   1    9.70    1.90
  14   7   1   15.80    2.80
  14   7   1   10.50    2.60
  15  -7   1   -2.00    1.20
  15  -7   1   -2.20    1.40
  15   7   1   -1.40    1.50
  15   7   1    0.00    1.50
  15   7   1    0.10    1.30
  15  -8  -1    6.40    1.80
  15  -8  -1    4.70    2.40
  15   8  -1    4.40    1.80
  15   8  -1    9.20    2.20
  15   8  -1    9.60    1.90
  14  -8  -1    9.10    2.40
  14  -8  -1    6.90    1.80
  14   8  -1    8.10    1.60
  14   8  -1    4.00    1.80
  14   8  -1    6.80    1.80
  13  -8  -1   80.19    6.30
  13  -8  -1   72.79    5.10
  13   8  -1   66.39    4.30
  13   8  -1   74.29    6.00
  13   8  -1   58.49    5.30
  12  -8  -1    6.60    2.10
  12  -8  -1    5.60    1.60
  12   8  -1    8.00    1.80
  12   8  -1    5.10    1.40
  12   8  -1    4.80    1.20
  11  -8  -1    4.80    1.50
  11  -8  -1    4.00    1.30
  11   8  -1    1.30    0.90
  11   8  -1    5.00    1.70
  11   8  -1    4.10    1.30
  10  -8  -1   61.09    4.80
  10  -8  -1   67.29    5.30
  10   8  -1   48.80    4.00
  10   8  -1   53.29    4.10
  10   8  -1   60.59    4.70
  10   8  -1   56.59    3.50
   9  -8  -1   18.40    2.80
   9  -8  -1   17.90    2.10
   9   8  -1   17.80    2.10
   9   8  -1   23.20    3.10
   9   8  -1   18.30    2.10
   8  -8  -1  137.49    7.70
   8  -8  -1  134.39    8.30
  -8  -8   1  146.09    7.30
   8   8  -1  146.29    8.40
  -8   8   1  133.79    7.40
   8   8  -1  146.79    7.90
   8   8  -1  137.39    7.00
   8   8  -1  142.79    8.00
  -7  -8   1   20.20    1.60
   7  -8  -1   21.00    2.00
   7  -8  -1   22.60    2.00
   7  -8  -1   20.90    2.20
   7   8  -1   21.00    2.00
   7   8  -1   22.70    2.10
   7   8  -1   23.00    1.50
   7   8  -1   18.40    2.50
   6  -8  -1   82.79    4.80
   6  -8  -1   83.39    5.20
   6  -8  -1   79.99    4.90
   6   8  -1   93.69    5.00
   6   8  -1   77.69    4.10
   6   8  -1   80.29    5.00
  -6   8   1   84.09    4.90
   6   8  -1   85.59    5.30
   5  -8  -1  141.79    7.60
   5  -8  -1  146.09    7.50
   5  -8  -1  141.09    7.90
   5   8  -1  145.29    8.00
   5   8  -1  148.29    7.60
   5   8  -1  144.39    7.80
  -5   8   1  145.29    7.70
  -5   8   1  140.79    7.30
  -4  -8   1  116.99    6.60
   4  -8  -1  117.39    5.90
   4  -8  -1  110.49    6.30
  -4   8   1  116.79    6.10
   4   8  -1   90.49    5.70
  -4   8   1  109.99    5.70
   4   8  -1  109.69    6.20
   4   8  -1  112.39    6.20
   3  -8  -1    8.70    1.30
  -3  -8   1    6.90    1.10
   3  -8  -1    9.50    1.20
  -3  -8   1    7.60    1.40
  -3  -8   1    7.90    1.00
   3   8  -1    5.90    1.00
  -3   8   1    8.50    1.00
   3   8  -1    4.30    1.10
  -3   8   1    7.60    1.30
   3   8  -1    7.50    1.30
  -3   8   1    6.60    0.80
  -2  -8   1  133.19    6.70
   2  -8  -1  136.59    6.80
   2  -8  -1  131.99    6.70
  -2  -8   1  133.49    7.20
   2  -8  -1  136.99    7.00
  -2  -8   1  131.39    7.10
  -2   8   1  136.29    6.70
  -2   8   1  139.29    7.10
   2   8  -1  129.89    7.20
   2   8  -1  125.49    7.10
   2   8  -1  138.79    6.80
   1  -8  -1  549.85   26.00
  -1  -8   1  522.75   26.40
   1  -8  -1  556.34   25.90
  -1  -8   1  558.34   25.60
  -1  -8   1  567.74   25.90
  -1  -8   1  547.05   26.40
   1   8  -1  563.74   25.70
   1   8  -1  597.84   25.90
   1   8  -1  543.95   26.60
  -1   8   1  567.14   26.40
  -1   8   1  550.94   25.90
  -1   8   1  547.85   25.80
   0  -8   1    7.30    0.80
   0  -8   1   10.60    1.50
   0  -8  -1    6.60    0.80
   0  -8  -1    8.60    1.10
   0  -8  -1    7.60    1.10
   0  -8   1    9.20    0.80
   0   8   1    9.30    0.90
   0   8  -1    6.30    1.10
   0   8   1    7.30    0.70
   0   8  -1    9.40    0.80
   0   8   1    7.20    1.10
   0   8  -1    7.70    0.90
  -1  -8  -1  280.77   13.90
   1  -8   1  293.77   14.20
  -1  -8  -1  275.57   13.80
   1  -8   1  298.57   13.40
  -1  -8  -1  277.77   13.70
   1  -8   1  300.57   13.60
   1   8   1  287.17   14.10
  -1   8  -1  314.07   13.30
   1   8   1  288.77   13.70
   1   8   1  282.07   13.40
  -1   8  -1  285.47   14.30
  -1   8  -1  237.88   13.60
  -2  -8  -1    1.80    0.60
   2  -8   1    1.90    0.80
  -2  -8  -1    1.00    0.50
   2  -8   1    1.70    0.70
  -2  -8  -1    1.20    0.50
   2  -8   1    1.60    0.30
   2   8   1    2.20    0.70
   2   8   1    1.50    0.60
   2   8   1    1.70    0.70
   2   8   1    1.80    0.40
  -2   8  -1    0.80    0.70
  -2   8  -1    1.70    0.30
  -2   8  -1    3.00    0.80
   3  -8   1  112.19    6.50
  -3  -8  -1  109.99    6.20
   3  -8   1  125.39    6.20
  -3   8  -1  116.79    5.50
   3   8   1  113.69    6.10
   3   8   1  118.39    6.30
  -3   8  -1  115.69    6.60
   3   8   1  117.69    5.80
   4  -8   1  121.79    7.30
   4  -8   1  141.79    6.90
  -4  -8  -1  126.09    6.80
   4   8   1  127.89    6.30
   4   8   1  133.29    7.00
  -4   8  -1  123.09    6.00
  -4   8  -1  120.19    7.10
  -4   8  -1  128.89    6.10
   4   8   1  128.19    6.90
   4   8   1  111.89    6.60
   5  -8   1    1.20    0.60
   5  -8   1    0.50    0.70
   5   8   1   -0.10    0.50
  -5   8  -1    0.70    1.00
   5   8   1    0.20    0.40
   5   8   1    0.20    0.40
  -5   8  -1    0.60    0.20
   5   8   1    1.00    0.60
   6  -8   1  138.69    7.10
   6  -8   1  121.99    7.30
   6   8   1  125.39    6.90
   6   8   1  121.59    6.50
   6   8   1  129.79    7.20
   6   8   1  129.89    7.20
  -6   8  -1  119.69    6.10
   7  -8   1   29.00    2.80
   7  -8   1   32.40    2.60
   7   8   1   28.90    2.60
   7   8   1   30.30    2.50
  -7   8  -1   29.90    1.90
   7   8   1   28.50    2.70
   7   8   1   35.00    2.60
   8  -8   1  111.19    6.40
   8  -8   1  104.49    6.90
   8   8   1  109.19    6.40
   8   8   1  109.99    6.70
   8   8   1  107.39    5.90
  -8   8  -1  105.19    5.50
   8   8   1  108.89    6.60
   9  -8   1   29.30    3.10
   9  -8   1   31.30    2.90
  -9   8  -1   32.30    2.20
   9   8   1   30.60    2.90
   9   8   1   33.40    2.90
   9   8   1   30.40    3.10
   9   8   1   31.10    2.50
  10  -8   1    1.30    1.10
  10   8   1    1.80    1.10
  10   8   1    0.90    1.20
  10   8   1    0.90    0.90
  10   8   1    1.90    1.00
  11  -8   1    1.70    1.40
  11  -8   1    2.00    1.20
  11   8   1   -0.20    1.00
  11   8   1    3.60    1.60
  11   8   1    0.50    0.80
  11   8   1    2.40    1.20
  12  -8   1   -0.60    1.10
  12  -8   1    1.30    1.30
  12   8   1    0.00    1.00
  12   8   1   -0.30    1.00
  12   8   1    0.30    1.10
  12   8   1    1.60    1.30
  13  -8   1   58.99    5.30
  13  -8   1   55.59    4.40
  13   8   1   46.80    4.70
  13   8   1   42.30    4.20
  13   8   1   51.99    3.70
  14  -8   1   11.80    2.10
  14  -8   1   12.70    2.80
  14   8   1    9.60    2.30
  14   8   1   14.60    2.60
  14   8   1   14.20    2.00
  15  -8   1    1.60    1.60
  15   8   1    1.30    1.60
  15   8   1   -1.70    1.30
  15   8   1    1.80    1.70
  15  -9  -1   11.10    2.50
  15  -9  -1   13.00    3.00
  15   9  -1   16.10    2.80
  15   9  -1   13.80    2.90
  14  -9  -1   87.39    5.90
  14  -9  -1   78.39    6.70
  14   9  -1   81.59    6.70
  14   9  -1   82.69    5.00
  14   9  -1   74.19    5.80
  13  -9  -1   44.00    4.60
  13  -9  -1   52.39    4.10
  13   9  -1   40.90    4.40
  13   9  -1   46.80    3.20
  13   9  -1   42.20    3.90
  12  -9  -1    5.30    1.70
  12  -9  -1    2.90    1.40
  12   9  -1    2.40    1.00
  12   9  -1    1.40    1.40
  12   9  -1    3.60    1.30
  11  -9  -1    0.50    0.80
  11  -9  -1    0.20    1.00
  11   9  -1    0.20    0.90
  11   9  -1    1.00    0.90
  11   9  -1    1.00    0.80
  11   9  -1    0.30    1.00
  10  -9  -1   17.90    2.80
  10  -9  -1   18.30    2.20
  10   9  -1   19.00    1.70
  10   9  -1   21.10    2.40
  10   9  -1   16.10    2.70
   9  -9  -1  207.88   12.10
   9  -9  -1  227.18   11.40
   9   9  -1  222.28   12.10
   9   9  -1  201.78   11.50
   9   9  -1  222.88   11.50
   9   9  -1  206.68   10.40
   8  -9  -1  137.59    8.40
   8  -9  -1  140.49    7.70
   8   9  -1  135.89    6.90
   8   9  -1  138.79    8.30
  -8   9   1  134.69    7.10
   8   9  -1  148.99    8.00
   8   9  -1  142.79    8.00
   7  -9  -1    5.50    1.30
   7  -9  -1    4.80    1.10
   7  -9  -1    7.50    1.60
   7   9  -1    7.00    1.20
  -7   9   1    4.70    1.30
   7   9  -1    6.50    0.70
   7   9  -1    5.30    1.40
   7   9  -1    7.10    1.30
   6  -9  -1   91.99    5.30
   6  -9  -1  101.09    5.80
   6  -9  -1   93.69    5.40
  -6   9   1   92.59    5.40
   6   9  -1   98.99    5.80
   6   9  -1   84.89    5.50
  -6   9   1   92.59    5.00
   6   9  -1   75.59    5.20
   5  -9  -1   89.49    5.20
   5  -9  -1   87.79    5.40
   5  -9  -1   95.39    5.10
  -5   9   1   92.39    5.30
  -5   9   1   83.59    4.80
   5   9  -1   94.19    5.50
   5   9  -1   81.69    5.30
   5   9  -1   89.19    5.10
   4  -9  -1  505.15   23.80
   4  -9  -1  525.45   23.60
   4   9  -1  484.15   23.50
   4   9  -1  461.05   23.90
  -4   9   1  508.25   23.90
  -4   9   1  487.95   23.30
  -3  -9   1    0.20    0.50
  -3  -9   1    0.20    0.40
   3  -9  -1    0.40    0.50
   3   9  -1    0.40    0.50
  -3   9   1    0.90    0.50
  -3   9   1   -0.40    0.50
   3   9  -1    0.80    0.60
  -3   9   1    0.60    0.40
  -2  -9   1   88.69    5.10
   2  -9  -1   85.79    4.70
  -2  -9   1   90.29    4.70
   2  -9  -1   85.19    4.70
   2  -9  -1   91.39    5.00
  -2  -9   1   86.99    5.20
  -2   9   1   86.29    4.60
  -2   9   1   89.59    5.20
  -2   9   1   94.79    4.70
   2   9  -1   94.09    4.80
   2   9  -1   82.69    5.10
   2   9  -1   91.79    5.30
   1  -9  -1  180.58    8.90
  -1  -9   1  171.68    9.30
  -1  -9   1  170.58    9.30
  -1  -9   1  181.98    8.50
   1  -9  -1  175.28    8.80
  -1  -9   1  177.58    8.80
   1  -9  -1  174.88    9.10
   1   9  -1  180.18    8.60
  -1   9   1  186.08    9.40
   1   9  -1  180.38    9.50
  -1   9   1  183.28    8.80
   1   9  -1  194.28    8.80
  -1   9   1  181.18    8.70
   0  -9   1   42.20    2.30
   0  -9   1   40.40    2.90
   0  -9  -1   36.40    2.60
   0  -9  -1   42.40    2.50
   0  -9  -1   41.30    2.60
   0  -9   1   41.90    2.40
   0   9   1   40.70    2.50
   0   9   1   42.10    2.90
   0   9  -1   47.30    2.40
   0   9  -1   35.60    2.40
   0   9   1   40.90    2.30
   0   9  -1   48.80    3.20
  -1  -9  -1   55.39    3.30
  -1  -9  -1   54.29    3.60
  -1  -9  -1   54.29    3.40
   1  -9   1   57.09    3.10
   1  -9   1   50.89    3.60
   1  -9   1   58.79    3.00
  -1   9  -1   49.10    3.30
  -1   9  -1   61.99    2.90
   1   9   1   54.79    3.60
   1   9   1   54.59    3.20
  -1   9  -1   54.29    3.80
   1   9   1   53.79    2.90
  -2  -9  -1   43.10    3.00
   2  -9   1   43.50    3.20
   2  -9   1   47.00    2.80
   2  -9   1   44.80    2.40
   2   9   1   50.49    3.50
   2   9   1   43.90    2.80
   2   9   1   46.90    3.00
  -2   9  -1   45.40    2.90
  -2   9  -1   50.59    3.50
   2   9   1   42.30    2.50
  -2   9  -1   50.29    2.40
   3  -9   1    2.70    0.80
  -3  -9  -1    4.10    1.00
   3  -9   1    2.50    1.00
   3   9   1    2.90    0.80
  -3   9  -1    2.80    0.40
   3   9   1    3.10    0.80
  -3   9  -1    3.90    1.00
   3   9   1    1.70    0.70
  -4  -9  -1  179.08    9.70
   4  -9   1  207.28    9.70
  -4   9  -1  184.78    8.80
   4   9   1  192.08    9.90
   4   9   1  188.18    9.60
   4   9   1  183.48    9.10
   4   9   1  180.08    9.70
   5  -9   1  194.88    9.20
   5  -9   1  176.88    9.50
   5   9   1  176.88    9.10
  -5   9  -1  161.28    9.40
  -5   9  -1  172.28    8.20
   5   9   1  183.68    9.80
   5   9   1  162.38    9.30
  -5   9  -1  160.28    8.30
   5   9   1  179.58    8.50
   6  -9   1   43.70    3.40
   6  -9   1   43.90    3.10
   6   9   1   40.20    3.20
  -6   9  -1   41.50    3.40
   6   9   1   42.70    2.60
  -6   9  -1   37.90    2.20
   6   9   1   38.80    3.10
   6   9   1   44.00    3.00
   7  -9   1    2.90    1.10
   7  -9   1    5.50    1.50
   7   9   1    1.30    0.80
  -7   9  -1    3.80    0.60
   7   9   1    1.40    0.80
   7   9   1    4.10    1.20
   7   9   1    3.90    1.00
   8  -9   1   63.59    4.30
   8  -9   1   59.99    4.60
   8   9   1   61.89    4.50
   8   9   1   60.29    4.40
   8   9   1   62.79    3.80
   8   9   1   59.79    4.20
   9  -9   1  165.88    9.50
   9  -9   1  158.68    9.50
   9   9   1  166.38    9.20
  -9   9  -1  153.98    7.90
   9   9   1  163.88    9.40
   9   9   1  151.18    8.20
   9   9   1  151.68    8.90
  10  -9   1  123.89    7.20
  10  -9   1  108.89    7.70
  10   9   1  124.29    7.40
  10   9   1  120.29    7.70
  10   9   1  104.89    6.30
  10   9   1  124.39    7.30
  11  -9   1   56.19    4.80
  11  -9   1   58.29    4.20
  11   9   1   49.20    4.00
  11   9   1   44.20    3.40
  11   9   1   48.10    4.50
  11   9   1   52.09    4.30
  12  -9   1   89.79    6.80
  12  -9   1   88.69    5.80
  12   9   1   81.69    5.80
  12   9   1   82.89    5.00
  12   9   1   86.19    6.00
  12   9   1   75.89    6.20
  13  -9   1   25.00    4.10
  13  -9   1   31.10    3.30
  13   9   1   27.00    2.50
  13   9   1   29.90    4.10
  13   9   1   33.30    3.40
  14  -9   1    3.50    1.50
  14  -9   1    4.90    1.70
  14   9   1    7.60    2.00
  14   9   1    7.90    1.80
  14   9   1    8.20    2.00
  15 -10  -1    7.80    2.80
  15 -10  -1    6.20    2.70
  15  10  -1    7.70    2.00
  15  10  -1    9.50    1.90
  15  10  -1    7.80    2.10
  14 -10  -1    1.70    1.60
  14 -10  -1    0.50    1.40
  14  10  -1   -0.30    1.30
  14  10  -1    1.50    1.20
  14  10  -1    2.20    1.50
  13 -10  -1   97.29    6.60
  13 -10  -1  103.69    7.60
  13  10  -1   92.39    5.50
  13  10  -1  102.29    6.80
  13  10  -1  103.09    7.40
  12 -10  -1   54.09    5.00
  12 -10  -1   61.39    4.50
  12  10  -1   50.89    4.50
  12  10  -1   57.59    5.00
  12  10  -1   54.49    3.50
  11 -10  -1  115.09    7.90
  11 -10  -1  126.89    7.20
  11  10  -1  112.39    7.60
  11  10  -1  105.99    6.00
  11  10  -1  105.69    7.10
  11  10  -1  120.59    7.30
  10 -10  -1  223.28   11.80
  10  10  -1  209.18   11.90
  10  10  -1  239.38   11.60
  10  10  -1  207.58   11.80
  10  10  -1  204.18   12.30
   9 -10  -1    1.50    1.00
   9 -10  -1    0.90    0.90
   9  10  -1    1.60    1.00
   9  10  -1    1.30    0.70
   9  10  -1    2.60    1.00
   9  10  -1    1.10    1.00
   8 -10  -1  152.18    8.90
   8 -10  -1  149.79    8.20
   8  10  -1  145.29    8.50
  -8  10   1  149.29    7.50
   8  10  -1  141.29    8.70
   8  10  -1  144.39    7.20
   8  10  -1  152.98    8.40
   7 -10  -1   24.10    2.30
   7 -10  -1   24.80    2.50
  -7  10   1   21.50    1.90
   7  10  -1   28.60    2.60
   7  10  -1   26.40    2.60
   7  10  -1   26.20    2.30
   6 -10  -1  147.49    8.30
   6 -10  -1  147.99    7.80
   6 -10  -1  142.09    8.30
   6  10  -1  155.48    8.00
   6  10  -1  139.99    8.20
   6  10  -1  135.19    8.20
  -6  10   1  139.59    7.90
  -6  10   1  150.48    7.50
   5 -10  -1  321.37   14.80
   5 -10  -1  292.97   15.20
   5 -10  -1  301.57   15.00
   5  10  -1  307.77   15.30
   5  10  -1  303.67   15.30
  -5  10   1  311.87   14.50
   5  10  -1  258.27   14.70
  -5  10   1  300.87   15.10
   4 -10  -1    0.80    0.60
   4 -10  -1    1.90    0.80
  -4  10   1    0.60    0.40
   4  10  -1    1.50    0.60
   4  10  -1    0.20    0.60
   4  10  -1    0.50    0.70
  -4  10   1   -0.50    0.50
   3 -10  -1    0.90    0.60
   3 -10  -1    0.50    0.50
   3 -10  -1    1.10    0.40
  -3  10   1    0.50    0.40
  -3  10   1    0.70    0.70
   3  10  -1    0.80    0.60
   3  10  -1    0.10    0.60
   2 -10  -1  443.56   21.90
  -2 -10   1  463.45   21.90
   2 -10  -1  461.05   21.90
   2 -10  -1  458.15   22.30
  -2  10   1  460.85   21.80
   2  10  -1  500.15   22.00
  -2  10   1  453.55   22.50
  -2  10   1  475.25   21.80
  -1 -10   1  140.79    6.80
   1 -10  -1  137.39    7.40
   1 -10  -1  137.29    7.50
  -1 -10   1  138.09    7.20
  -1 -10   1  143.39    8.00
   1 -10  -1  142.09    7.10
   1  10  -1  139.49    7.90
  -1  10   1  142.89    7.70
   1  10  -1  141.09    6.90
  -1  10   1  135.69    7.10
   1  10  -1  152.58    7.10
   0 -10  -1  162.38    8.20
   0 -10  -1  165.28    8.40
   0 -10   1  166.18    8.10
   0 -10  -1  159.58    8.60
   0 -10   1  168.68    8.00
   0  10  -1  162.98    9.00
   0  10  -1  188.28    8.10
   0  10   1  167.98    8.80
   0  10   1  158.48    8.00
   0  10   1  170.48    8.30
   0  10  -1  149.39    8.10
  -1 -10  -1   60.89    3.60
  -1 -10  -1   59.29    3.70
   1 -10   1   61.59    3.40
   1 -10   1   62.39    3.20
   1  10   1   55.29    3.70
  -1  10  -1   65.39    3.20
   1  10   1   59.69    3.10
  -1  10  -1   51.09    3.40
  -1  10  -1   61.69    4.20
  -2 -10  -1  171.78    8.90
   2 -10   1  162.68    8.70
   2 -10   1  165.28    8.20
   2  10   1  169.18    9.10
  -2  10  -1  163.08    9.30
  -2  10  -1  190.58    8.10
   2  10   1  170.78    8.20
  -2  10  -1  166.18    8.70
   2  10   1  172.78    8.70
  -3 -10  -1    5.70    1.10
   3 -10   1    7.40    1.20
  -3  10  -1    7.60    0.60
   3  10   1    5.80    0.70
   3  10   1    6.60    1.10
   3  10   1    5.70    1.30
   3  10   1    6.20    1.30
  -3  10  -1    8.10    1.70
   4 -10   1  135.59    6.70
   4  10   1  106.59    6.50
  -4  10  -1  122.29    7.20
   4  10   1  131.19    7.00
   4  10   1  119.19    6.10
  -4  10  -1  126.29    5.90
   4  10   1  124.89    7.10
   5 -10   1   60.59    3.70
   5  10   1   58.09    3.10
   5  10   1   55.49    3.90
  -5  10  -1   52.59    4.00
  -5  10  -1   57.09    2.90
   5  10   1   55.79    3.60
  -5  10  -1   56.89    2.80
   5  10   1   47.70    3.80
   6 -10   1  139.89    8.20
   6 -10   1  147.89    7.70
   6  10   1  144.79    8.00
   6  10   1  140.59    7.90
   6  10   1  140.39    7.00
  -6  10  -1  137.09    6.70
  -6  10  -1  132.49    8.10
   6  10   1  144.09    7.70
  -6  10  -1  128.79    6.80
   7 -10   1    2.00    0.80
   7 -10   1    2.90    1.00
   7  10   1    1.90    1.00
   7  10   1    4.30    1.10
   7  10   1    1.90    0.90
  -7  10  -1    2.70    0.50
   7  10   1    1.90    0.70
   8 -10   1  213.98   11.60
   8 -10   1  210.48   10.90
  -8  10  -1  201.38    9.80
   8  10   1  218.08   11.40
   8  10   1  208.28   11.20
   8  10   1  205.18   10.90
   8  10   1  176.08   10.20
   9 -10   1  246.98   13.10
   9 -10   1  250.67   12.30
   9  10   1  222.38   11.30
   9  10   1  216.68   12.40
   9  10   1  213.68   12.50
   9  10   1  233.98   12.60
  -9  10  -1  222.18   11.00
  10 -10   1    6.00    1.60
  10 -10   1    5.50    1.70
 -10  10  -1    3.70    1.10
  10  10   1    7.90    1.30
  10  10   1    5.40    1.60
  10  10   1    7.10    1.80
  10  10   1    7.40    1.70
  11 -10   1    1.40    1.30
  11 -10   1   -0.10    1.10
  11  10   1   -1.10    1.10
  11  10   1   -0.50    0.80
  11  10   1    0.50    1.10
  11  10   1    0.40    0.90
  12 -10   1    0.50    1.10
  12 -10   1   -0.70    1.10
  12  10   1    0.90    1.30
  12  10   1    2.00    1.10
  12  10   1    0.80    1.30
  12  10   1    0.20    1.10
  13 -10   1   79.19    5.70
  13 -10   1   82.39    6.70
  13  10   1   80.29    6.40
  13  10   1   77.89    5.80
  13  10   1   79.59    4.90
  13  10   1   81.59    6.00
  14 -10   1   64.79    6.10
  14  10   1   74.39    5.70
  14  10   1   62.59    5.30
  14  10   1   68.69    5.70
  15 -11  -1   14.00    2.70
  15 -11  -1   15.50    3.90
  15  11  -1    6.20    2.20
  15  11  -1   17.00    2.30
  15  11  -1   16.30    2.70
  14 -11  -1   79.49    6.90
  14 -11  -1   75.29    5.90
  14  11  -1   77.99    6.50
  14  11  -1   85.39    6.20
  14  11  -1   79.19    4.90
  13 -11  -1   11.90    2.10
  13 -11  -1   13.40    2.90
  13  11  -1   12.50    1.70
  13  11  -1   10.10    2.10
  13  11  -1   13.60    3.00
  12 -11  -1    5.80    1.60
  12 -11  -1    5.30    1.60
  12  11  -1    3.90    1.10
  12  11  -1    3.20    1.60
  12  11  -1    6.30    1.70
  12  11  -1    5.10    1.80
  11 -11  -1    2.60    1.40
  11 -11  -1    1.50    1.10
  11  11  -1    3.90    1.00
  11  11  -1    3.10    1.10
  11  11  -1    2.80    0.80
  10 -11  -1   29.80    3.00
  10 -11  -1   36.40    3.50
  10  11  -1   29.60    3.10
  10  11  -1   30.20    3.00
  10  11  -1   29.70    2.10
  10  11  -1   30.80    3.30
   9 -11  -1  120.79    7.20
   9 -11  -1  112.09    7.40
   9  11  -1  104.59    6.90
   9  11  -1  102.99    6.70
   9  11  -1  110.99    7.20
   8 -11  -1   10.70    2.10
   8 -11  -1   13.20    2.00
   8  11  -1   13.20    2.10
   8  11  -1    7.80    1.80
  -8  11   1   12.90    1.60
  -8  11   1   11.20    1.20
   8  11  -1   12.20    2.10
   7 -11  -1   85.29    5.20
   7 -11  -1   83.79    5.70
   7  11  -1   92.09    5.40
  -7  11   1   81.39    5.40
   7  11  -1   83.69    5.60
   7  11  -1   87.59    5.80
  -7  11   1   86.79    4.80
   6 -11  -1  276.07   14.00
   6 -11  -1  271.37   13.40
   6  11  -1  230.98   13.30
   6  11  -1  279.77   14.00
  -6  11   1  269.27   13.00
   6  11  -1  272.17   14.00
  -6  11   1  264.97   14.20
   5 -11  -1    1.60    0.80
  -5  11   1    1.30    0.70
   5  11  -1    1.20    0.80
   5  11  -1    1.10    0.50
   5  11  -1   -0.30    0.60
  -5  11   1    0.70    0.50
   4 -11  -1   37.90    3.20
   4 -11  -1   45.40    2.90
   4  11  -1   45.40    2.90
   4  11  -1   40.80    3.20
  -4  11   1   39.20    2.50
   4  11  -1   43.00    3.20
  -4  11   1   40.40    3.20
   3 -11  -1   78.79    4.50
   3 -11  -1   82.69    5.10
   3 -11  -1   76.79    4.40
  -3  11   1   78.99    4.30
   3  11  -1   80.49    5.10
   3  11  -1   81.89    4.60
   3  11  -1   76.59    5.00
  -3  11   1   85.99    5.10
  -2 -11   1    1.50    0.60
   2 -11  -1    1.20    0.60
   2 -11  -1    1.10    0.60
  -2  11   1    0.60    0.60
  -2  11   1    0.60    0.50
   2  11  -1    0.60    0.40
  -2  11   1    0.40    0.40
   1 -11  -1   98.29    5.30
  -1 -11   1  100.69    4.90
   1 -11  -1   99.29    5.20
  -1 -11   1   92.89    5.10
  -1  11   1  101.49    5.10
   1  11  -1   94.09    6.00
   1  11  -1  102.79    5.20
   1  11  -1   98.69    5.00
  -1  11   1   92.39    5.80
  -1  11   1  101.29    5.20
   0 -11  -1   17.90    1.60
   0 -11  -1   18.50    1.50
   0 -11   1   18.70    1.40
   0 -11  -1   17.40    1.80
   0 -11   1   19.30    1.40
   0  11  -1   22.20    1.50
   0  11   1   21.50    2.10
   0  11   1   18.60    1.30
   0  11  -1   18.80    2.00
   0  11  -1   17.20    1.50
   0  11   1   17.80    1.50
   1 -11   1   39.00    2.30
  -1 -11  -1   33.90    2.70
   1 -11   1   35.40    2.30
   1  11   1   41.90    2.60
   1  11   1   38.70    2.90
  -1  11  -1   44.60    2.20
  -1  11  -1   31.20    2.40
  -1  11  -1   41.50    3.20
   1  11   1   34.10    2.10
   2 -11   1  404.46   18.20
   2 -11   1  373.36   17.80
  -2 -11  -1  356.36   18.50
  -2  11  -1  379.36   19.10
  -2  11  -1  414.96   17.70
   2  11   1  367.76   18.20
   2  11   1  381.86   18.80
   2  11   1  358.06   17.70
   3 -11   1   12.20    1.30
  -3  11  -1    9.70    1.80
   3  11   1   10.70    1.50
   3  11   1    7.70    1.40
   3  11   1   11.30    1.80
  -3  11  -1   11.30    0.80
   3  11   1    9.70    0.80
   4 -11   1   37.00    2.60
   4  11   1   36.10    2.90
  -4  11  -1   36.00    1.80
  -4  11  -1   30.50    2.90
   4  11   1   33.30    2.00
   4  11   1   34.60    2.60
   4  11   1   32.80    2.70
   5 -11   1  269.37   12.70
  -5  11  -1  239.08   13.20
   5  11   1  250.17   11.90
   5  11   1  240.78   12.90
   5  11   1  253.67   13.10
  -5  11  -1  246.78   11.60
   5  11   1  247.38   12.60
   6 -11   1    2.00    1.00
   6 -11   1    1.80    0.80
   6  11   1    2.10    0.60
  -6  11  -1    2.30    0.40
  -6  11  -1    1.90    0.40
   6  11   1    3.20    1.10
   6  11   1    2.50    1.00
   6  11   1    2.40    1.00
  -6  11  -1    2.30    1.00
   7 -11   1    3.50    1.10
   7 -11   1    4.40    1.40
   7  11   1    3.70    0.90
   7  11   1    5.60    1.40
  -7  11  -1    6.10    0.80
   7  11   1    3.70    1.30
  -7  11  -1    4.70    0.60
   7  11   1    4.70    1.30
   8 -11   1   67.79    4.60
   8 -11   1   65.79    5.00
   8  11   1   76.29    4.70
   8  11   1   66.79    4.20
   8  11   1   62.39    4.80
   8  11   1   66.59    4.80
  -8  11  -1   66.19    3.50
  -8  11  -1   64.99    3.70
   9 -11   1  101.89    6.20
   9  11   1   95.59    5.30
   9  11   1   96.39    6.60
   9  11   1  100.79    6.30
   9  11   1   99.49    6.50
  10 -11   1  197.08   10.40
  10 -11   1  195.58   11.40
 -10  11  -1  176.58    9.10
  10  11   1  188.08   10.90
  10  11   1  190.48   10.50
  10  11   1  175.68    9.30
  11 -11   1   14.90    2.40
  11 -11   1   17.50    3.00
  11  11   1   13.90    2.70
  11  11   1   13.90    2.40
  11  11   1   13.40    1.70
  11  11   1    9.20    2.00
  12 -11   1   34.10    3.50
  12 -11   1   37.80    4.20
  12  11   1   36.10    2.70
  12  11   1   38.40    4.00
  12  11   1   39.60    3.70
  12  11   1   39.50    3.80
  13 -11   1   26.20    4.00
  13 -11   1   19.40    3.00
  13  11   1   30.80    3.20
  13  11   1   22.40    2.30
  13  11   1   20.90    3.30
  13  11   1   22.40    3.20
  14 -11   1    5.60    1.90
  14 -11   1    4.10    2.00
  14  11   1    3.20    1.60
  14  11   1    2.60    1.80
  14  11   1    4.10    1.60
  15 -12  -1   -0.40    1.20
  15 -12  -1   -0.40    1.70
 -15  12   1   -3.60    1.60
  15  12  -1   -4.20    1.30
  15  12  -1   -0.40    1.40
  15  12  -1   -2.10    1.30
  14 -12  -1   -0.30    1.30
  14 -12  -1   -0.60    1.10
  14  12  -1    2.00    1.10
  14  12  -1    2.40    1.40
  14  12  -1    0.60    1.60
  13 -12  -1   29.70    3.20
  13 -12  -1   30.00    4.20
  13  12  -1   27.60    4.00
  13  12  -1   23.90    3.40
  13  12  -1   29.40    2.50
  12 -12  -1    2.00    1.10
  12 -12  -1    2.40    1.40
  12  12  -1    1.40    1.40
  12  12  -1    3.30    1.10
  12  12  -1    1.10    1.30
  12  12  -1    3.50    1.00
  11 -12  -1    0.10    1.00
  11 -12  -1    2.90    1.20
  11  12  -1    2.80    1.30
  11  12  -1    0.50    0.90
  11  12  -1    1.50    1.20
 -11  12   1   -0.50    0.80
  10 -12  -1  191.28   11.20
  10 -12  -1  194.48   10.50
 -10  12   1  182.28    9.70
  10  12  -1  191.38   10.60
  10  12  -1  186.58   11.10
  10  12  -1  175.58   10.70
   9 -12  -1   12.30    2.50
   9 -12  -1    9.80    1.80
   9  12  -1    8.80    1.90
  -9  12   1   10.20    1.60
   9  12  -1    8.20    1.90
   9  12  -1    9.10    2.00
   8 -12  -1    4.20    1.30
   8 -12  -1    3.00    1.40
  -8  12   1    2.90    0.80
   8  12  -1    3.20    1.10
   8  12  -1    1.90    1.20
  -8  12   1    1.60    1.10
   8  12  -1    3.40    1.00
   7 -12  -1   15.70    2.40
   7 -12  -1   12.90    2.00
   7  12  -1   14.40    2.00
   7  12  -1   12.20    2.10
  -7  12   1   14.40    1.40
   7  12  -1   14.00    2.30
  -7  12   1   15.90    2.20
   6 -12  -1    7.50    1.50
   6 -12  -1    8.40    1.70
  -6  12   1   10.30    1.80
  -6  12   1    9.90    1.00
   6  12  -1    8.60    1.50
   6  12  -1    7.80    1.70
   6  12  -1    9.20    1.70
   5 -12  -1  265.47   12.90
   5  12  -1  257.27   13.40
  -5  12   1  252.27   12.40
   5  12  -1  259.17   12.90
   5  12  -1  246.88   13.50
  -5  12   1  250.07   13.30
   4 -12  -1    0.80    0.60
  -4  12   1    1.20    0.50
   4  12  -1    0.00    0.60
   4  12  -1    0.60    0.70
   4  12  -1   -0.20    0.50
  -4  12   1    0.10    0.50
   3 -12  -1  347.47   16.20
   3 -12  -1  308.47   16.00
   3  12  -1  330.67   16.80
  -3  12   1  342.07   16.90
  -3  12   1  313.57   15.90
   3  12  -1  322.77   16.90
   3  12  -1  365.76   16.30
   2 -12  -1  557.34   26.90
   2 -12  -1  542.95   26.90
   2  12  -1  557.94   27.80
   2  12  -1  632.04   26.90
  -2  12   1  554.14   26.70
  -2  12   1  574.94   27.60
  -1 -12   1    4.00    0.60
   1 -12  -1    2.70    0.70
  -1 -12   1    4.50    0.80
   1 -12  -1    5.40    1.00
   1  12  -1    4.80    0.80
   1  12  -1    4.80    0.80
  -1  12   1    4.60    0.80
  -1  12   1    5.60    0.90
   1  12  -1    4.30    1.20
  -1  12   1    5.20    1.30
   0 -12   1   28.90    1.90
   0 -12   1   28.00    2.00
   0 -12  -1   28.80    2.00
   0  12  -1   25.60    2.10
   0  12  -1   34.90    2.00
   0  12   1   29.70    2.10
   0  12   1   28.70    1.80
   0  12   1   31.50    2.70
   0  12  -1   28.40    2.60
   1 -12   1  251.07   11.60
   1 -12   1  232.58   11.50
   1  12   1  245.98   12.50
   1  12   1  234.68   11.30
  -1  12  -1  268.27   11.50
  -1  12  -1  236.08   12.70
   1  12   1  237.78   11.80
  -1  12  -1  207.08   11.70
   2 -12   1    0.70    0.60
   2 -12   1    1.10    0.40
  -2  12  -1    1.20    0.40
   2  12   1    0.70    0.60
   2  12   1    1.50    0.70
   2  12   1    0.40    0.30
  -2  12  -1    0.60    0.70
   3 -12   1  108.19    5.70
   3  12   1  104.09    6.30
   3  12   1   97.89    6.00
  -3  12  -1  109.19    5.10
   3  12   1   99.29    5.10
  -3  12  -1  103.69    6.50
   3  12   1  104.19    5.80
   4 -12   1    7.00    1.40
   4  12   1    5.80    1.20
   4  12   1    8.30    1.50
  -4  12  -1    5.80    1.50
   4  12   1   10.00    1.80
  -4  12  -1    8.90    0.60
   5 -12   1  255.37   12.50
   5  12   1  244.78   12.80
   5  12   1  250.27   12.50
   5  12   1  241.68   13.00
  -5  12  -1  236.48   13.20
   6 -12   1  150.78    8.50
   6 -12   1  151.88    7.90
   6  12   1  145.59    7.90
  -6  12  -1  133.59    6.70
   6  12   1  139.39    7.00
   6  12   1  134.59    8.20
  -6  12  -1  144.79    8.50
  -6  12  -1  140.69    6.80
   6  12   1  139.79    8.10
   7 -12   1   14.80    2.50
   7 -12   1   18.40    2.00
  -7  12  -1   15.20    2.50
   7  12   1   18.60    2.60
  -7  12  -1   14.60    1.10
   7  12   1   15.60    2.20
   7  12   1   15.80    1.40
  -7  12  -1   15.20    1.00
   7  12   1   15.70    2.40
   8 -12   1    0.20    0.80
   8 -12   1   -0.30    1.20
  -8  12  -1   -0.90    0.40
   8  12   1    0.30    0.70
  -8  12  -1   -0.10    0.40
   8  12   1    0.90    1.10
   8  12   1   -0.20    0.60
   9 -12   1   19.00    2.90
   9 -12   1   20.40    2.40
   9  12   1   26.70    2.90
   9  12   1   15.20    2.40
  -9  12  -1   18.90    1.50
   9  12   1   15.00    1.60
  -9  12  -1   16.40    1.30
   9  12   1   20.20    2.70
  10 -12   1   40.00    3.90
  10 -12   1   32.80    3.10
  10  12   1   36.50    3.30
  10  12   1   34.90    3.40
  10  12   1   32.80    2.40
  10  12   1   31.00    3.60
 -10  12  -1   36.20    2.40
  11 -12   1    0.10    1.10
  11 -12   1    1.80    1.30
 -11  12  -1   -1.00    0.70
  11  12   1   -0.60    0.90
  11  12   1    2.80    1.40
  11  12   1    0.00    0.90
  12 -12   1    2.00    1.30
  12 -12   1    1.30    1.30
  12  12   1    0.90    1.50
  12  12   1    2.40    1.10
  12  12   1    3.90    1.80
  12  12   1    1.10    1.00
  13 -12   1   27.60    3.10
  13 -12   1   34.10    4.70
  13  12   1   27.70    2.50
  13  12   1   28.90    4.10
  13  12   1   33.30    3.50
  13  12   1   20.90    3.10
  14 -12   1    5.40    2.00
  14  12   1    7.10    2.20
  14  12   1    5.00    1.70
  14  12   1    5.80    1.90
  15 -13  -1    1.50    1.70
  15 -13  -1    2.40    1.60
 -15  13   1   -4.90    1.80
  15  13  -1    3.20    1.80
  15  13  -1    6.50    2.10
  14 -13  -1    9.40    3.60
  14 -13  -1    7.20    2.50
 -14  13   1    9.10    1.90
  14  13  -1    5.50    2.20
  14  13  -1    8.80    2.30
  13 -13  -1   -2.80    0.90
  13 -13  -1    0.80    1.00
 -13  13   1    0.10    1.30
  13  13  -1   -1.90    1.10
  13  13  -1   -0.80    1.40
  12 -13  -1   14.90    2.70
  12 -13  -1   23.80    2.70
 -12  13   1   17.90    2.30
  12  13  -1   25.40    3.70
  12  13  -1   19.20    2.90
  12  13  -1   18.20    2.90
  11 -13  -1   23.60    3.60
  11 -13  -1   21.40    2.50
 -11  13   1   21.00    2.20
  11  13  -1   26.30    2.80
  11  13  -1   22.60    3.50
  11  13  -1   23.00    3.20
  10 -13  -1   12.30    2.00
  10 -13  -1   18.00    3.20
 -10  13   1   14.60    1.60
  10  13  -1   10.90    2.20
  10  13  -1   16.50    2.50
  10  13  -1   14.70    2.60
   9 -13  -1    1.70    1.40
   9 -13  -1    3.30    1.10
   9  13  -1    2.20    1.00
  -9  13   1    2.50    1.30
   9  13  -1    3.20    1.30
   9  13  -1    4.10    1.40
   8 -13  -1   12.40    2.30
   8 -13  -1   12.90    2.10
   8  13  -1   17.50    2.40
  -8  13   1   12.40    2.10
   8  13  -1   11.50    2.00
  -8  13   1   12.80    1.40
   8  13  -1   14.80    2.50
   7 -13  -1   14.40    2.30
   7 -13  -1   13.40    2.10
  -7  13   1   13.00    2.00
  -7  13   1   13.40    1.60
   7  13  -1   12.10    2.20
   7  13  -1   14.10    2.40
   7  13  -1   14.90    2.10
   6 -13  -1  262.37   13.70
   6 -13  -1  274.07   14.40
  -6  13   1  272.67   14.20
   6  13  -1  270.77   14.40
   6  13  -1  277.67   13.90
  -6  13   1  269.07   13.20
   6  13  -1  274.17   14.50
   5 -13  -1   33.80    2.70
  -5  13   1   32.20    2.90
   5  13  -1   36.20    2.70
  -5  13   1   33.70    2.30
   5  13  -1   31.20    3.00
   5  13  -1   35.60    3.10
   4 -13  -1   10.50    1.50
   4  13  -1    8.60    1.40
   4  13  -1   10.50    1.80
  -4  13   1    9.30    1.70
   4  13  -1    8.40    1.70
  -4  13   1    9.90    1.20
   3 -13  -1  184.38    9.80
   3 -13  -1  199.78    9.90
  -3  13   1  199.78   10.70
  -3  13   1  195.08    9.60
   3  13  -1  192.98    9.90
   3  13  -1  195.78   10.80
  -2 -13   1   21.20    1.30
   2 -13  -1   20.20    1.80
   2 -13  -1   19.20    1.70
  -2  13   1   18.90    1.50
   2  13  -1   18.10    2.10
  -2  13   1   17.50    2.10
   2  13  -1   22.80    1.70
   1 -13  -1  124.49    6.30
   1 -13  -1  122.19    6.80
  -1 -13   1  118.39    5.90
  -1 -13   1  115.29    6.50
  -1  13   1  119.19    7.10
   1  13  -1  115.19    7.20
   1  13  -1  116.49    6.00
  -1  13   1  117.89    6.10
   0 -13   1    8.10    1.00
   0 -13   1    9.70    1.00
   0 -13  -1    8.40    1.00
   0  13  -1   11.00    1.40
   0  13   1    8.30    0.90
   0  13   1   10.30    1.80
   0  13   1   10.40    1.10
   0  13  -1    9.40    1.80
   0  13  -1    8.80    1.00
   1 -13   1  206.28   10.20
  -1  13  -1  228.38   10.10
  -1  13  -1  205.28   11.40
   1  13   1  206.88   11.20
   1  13   1  213.58   10.40
  -1  13  -1  186.08   10.30
   1  13   1  200.38    9.90
   2 -13   1  442.16   21.20
   2 -13   1  465.55   21.50
   2  13   1  439.06   22.40
  -2  13  -1  437.06   22.60
  -2  13  -1  486.95   21.10
   2  13   1  432.66   21.60
   3 -13   1   22.10    1.90
   3  13   1   21.00    2.30
  -3  13  -1   21.40    2.50
  -3  13  -1   25.40    1.40
   3  13   1   23.30    2.00
   3  13   1   19.10    1.30
   4 -13   1   10.60    1.60
   4  13   1    6.70    1.50
   4  13   1    7.20    1.50
   4  13   1    6.90    1.30
  -4  13  -1    7.30    0.60
  -4  13  -1    9.40    2.00
   5 -13   1   71.89    4.40
   5  13   1   62.29    4.50
   5  13   1   66.69    4.30
  -5  13  -1   64.59    4.90
   5  13   1   70.79    4.80
   6 -13   1  138.29    7.40
   6 -13   1  138.29    8.10
   6  13   1  124.39    7.40
   6  13   1  131.99    7.90
  -6  13  -1  126.19    8.00
   6  13   1  126.79    7.70
   7 -13   1   33.20    2.70
   7 -13   1   29.60    3.00
   7  13   1   28.80    2.90
   7  13   1   25.20    1.90
   7  13   1   28.10    3.00
   7  13   1   25.10    2.50
  -7  13  -1   27.40    2.90
   8 -13   1    0.60    1.00
   8 -13   1   -0.40    0.60
   8  13   1    1.80    1.20
   8  13   1   -0.20    0.80
   8  13   1    0.40    0.60
   8  13   1   -0.10    0.80
   9 -13   1   18.20    3.00
   9 -13   1   16.40    2.40
  -9  13  -1   13.40    1.10
   9  13   1   14.40    2.50
   9  13   1   13.50    1.60
   9  13   1   16.70    4.00
   9  13   1   12.10    2.10
  -9  13  -1   14.70    1.10
  10 -13   1   27.80    4.00
  10 -13   1   22.00    2.50
  10  13   1   21.50    3.10
 -10  13  -1   18.30    1.60
 -10  13  -1   21.70    1.60
  10  13   1   25.50    2.60
  10  13   1   25.90    3.50
  10  13   1   22.80    1.80
  11 -13   1   17.40    2.70
  11 -13   1   20.30    3.50
  11  13   1   15.00    2.60
  11  13   1   22.30    3.00
  11  13   1   24.50    3.50
 -11  13  -1   14.20    1.60
  11  13   1   19.20    1.80
  12 -13   1    1.20    1.40
  12 -13   1    1.20    1.30
  12  13   1    1.30    1.20
  12  13   1    2.30    1.10
  12  13   1    2.40    1.60
  12  13   1    0.70    1.50
 -12  13  -1   -1.10    0.90
  13 -13   1    8.50    2.60
  13 -13   1    9.00    2.40
  13  13   1   14.60    2.80
  13  13   1   11.70    1.70
  13  13   1   17.50    3.00
  13  13   1   13.00    2.50
  14 -13   1   -1.00    1.30
  14 -13   1    0.40    1.40
  14  13   1   -0.10    1.20
  14  13   1   -0.30    1.50
  14  13   1    2.20    1.70
  14 -14  -1    2.20    1.40
 -14  14   1   -1.30    1.50
  14  14  -1    0.50    1.40
  14  14  -1    0.60    1.40
  13 -14  -1    5.00    1.70
  13 -14  -1    8.30    2.60
  13  14  -1    8.60    2.00
 -13  14   1    6.60    1.70
  13  14  -1    6.50    2.10
  12 -14  -1    5.40    1.60
  12 -14  -1   11.60    2.60
  12  14  -1   14.70    3.00
  12  14  -1    9.40    2.20
 -12  14   1   10.50    1.70
  12  14  -1   10.50    2.10
  11 -14  -1   46.50    4.00
  11 -14  -1   48.90    4.70
 -11  14   1   46.80    3.30
  11  14  -1   49.90    4.20
  11  14  -1   46.40    4.30
  11  14  -1   50.49    4.70
  10 -14  -1   18.10    3.10
  10 -14  -1   26.20    2.60
  10  14  -1   16.40    3.30
 -10  14   1   20.10    1.90
  10  14  -1   22.90    2.60
   9 -14  -1   -0.70    0.70
   9 -14  -1    0.40    0.90
   9  14  -1    0.20    0.90
   9  14  -1    3.10    1.30
   9  14  -1    1.00    1.00
  -9  14   1    1.40    0.70
   8 -14  -1    0.10    0.90
  -8  14   1    0.80    0.80
  -8  14   1    1.90    0.60
   8  14  -1    2.90    1.30
   8  14  -1    1.60    1.10
   7 -14  -1   88.19    5.40
   7 -14  -1   82.49    5.90
  -7  14   1   84.09    4.70
   7  14  -1   85.29    5.50
   7  14  -1   83.29    5.90
   7  14  -1   86.99    5.90
  -7  14   1   78.99    5.60
   6 -14  -1    8.70    1.80
   6 -14  -1   12.50    1.90
   6  14  -1   11.10    2.00
  -6  14   1   11.50    1.40
  -6  14   1   11.70    2.10
   6  14  -1   12.90    2.40
   6  14  -1    7.60    1.50
   5 -14  -1    6.00    1.40
   5  14  -1    3.10    1.20
  -5  14   1    5.00    1.40
   5  14  -1    5.60    1.30
  -5  14   1    5.00    0.80
   5  14  -1    3.90    1.20
   4 -14  -1   40.50    3.00
   4  14  -1   40.40    3.00
  -4  14   1   40.70    2.60
  -4  14   1   47.30    3.60
   4  14  -1   44.00    3.50
   4  14  -1   40.50    3.60
   3 -14  -1   36.70    2.70
   3 -14  -1   34.80    2.50
  -3  14   1   38.70    3.30
  -3  14   1   38.20    2.40
   3  14  -1   41.20    2.80
   3  14  -1   34.40    3.20
   2 -14  -1  627.64   30.60
  -2 -14   1  629.14   30.00
   2 -14  -1  646.14   30.60
  -2  14   1  635.34   31.50
   2  14  -1  727.43   30.70
   2  14  -1  622.34   31.60
  -1 -14   1  104.59    5.60
  -1  14   1  104.39    5.70
  -1  14   1  107.69    6.80
   1  14  -1  118.09    5.90
  -1  14   1  110.89    5.90
   1  14  -1  110.49    5.70
   1  14  -1  119.29    7.10
   0 -14   1   45.20    2.90
   0 -14  -1   48.40    3.00
   0 -14   1   48.80    2.90
   0  14   1   51.49    3.90
   0  14   1   51.69    3.10
   0  14  -1   54.29    3.00
   0  14   1   45.10    2.80
   0  14  -1   45.20    3.00
   0  14  -1   48.10    3.90
   1 -14   1   33.10    2.30
   1 -14   1   35.40    2.30
  -1  14  -1   30.90    3.10
   1  14   1   34.00    2.10
   1  14   1   33.50    2.40
   1  14   1   35.70    3.10
  -1  14  -1   37.70    2.20
   2 -14   1  280.87   13.60
   2 -14   1  266.47   13.40
  -2  14  -1  260.97   14.70
   2  14   1  276.77   14.60
   2  14   1  280.07   13.80
   2  14   1  264.97   13.00
  -2  14  -1  309.67   13.30
   3 -14   1  522.15   24.50
   3  14   1  497.75   25.50
   3  14   1  490.85   23.80
   3  14   1  511.45   24.70
  -3  14  -1  549.65   23.90
  -3  14  -1  512.75   25.80
   4 -14   1    2.00    0.90
  -4  14  -1    1.80    0.40
  -4  14  -1    0.30    0.90
   4  14   1    1.40    0.70
   4  14   1    1.50    0.90
   4  14   1    1.40    0.90
   5 -14   1  214.98   10.60
   5  14   1  199.78   11.00
   5  14   1  181.48   10.50
   5  14   1  216.38   11.50
  -5  14  -1  202.98   11.50
   6 -14   1  171.58    8.90
  -6  14  -1  161.88    9.60
   6  14   1  156.58    9.20
   6  14   1  160.18    8.90
   6  14   1  157.38    9.50
   7 -14   1   47.00    4.30
   7 -14   1   58.19    3.80
   7  14   1   49.99    4.20
   7  14   1   47.60    4.10
  -7  14  -1   51.89    4.40
   7  14   1   52.39    4.30
   8 -14   1   17.80    2.50
   8 -14   1   18.90    2.90
   8  14   1   14.10    2.40
   8  14   1   16.80    2.40
   8  14   1   16.40    2.70
   9 -14   1    3.20    1.30
   9 -14   1    4.70    1.50
   9  14   1    1.80    1.30
   9  14   1    2.90    1.20
   9  14   1    3.70    1.70
  10 -14   1   49.00    4.00
  10 -14   1   55.89    4.90
  10  14   1   47.20    4.40
  10  14   1   41.70    3.50
  10  14   1   54.49    4.60
  10  14   1   43.80    3.90
  11 -14   1   16.60    3.20
  11 -14   1    7.80    1.80
  11  14   1   15.10    2.60
  11  14   1   11.60    2.40
  11  14   1   11.30    2.30
  11  14   1   10.80    1.40
  12 -14   1   32.60    3.30
  12 -14   1   39.60    4.20
  12  14   1   33.90    4.40
  12  14   1   34.00    3.40
  12  14   1   31.30    2.40
  12  14   1   25.60    3.60
  13 -14   1   -1.70    1.20
  13 -14   1   -0.90    1.40
  13  14   1    2.70    1.60
  13  14   1    0.60    1.10
  13  14   1   -0.90    1.50
  14 -15  -1   -0.80    1.20
  14 -15  -1   -0.50    1.40
  14  15  -1   -0.40    1.30
  14  15  -1   -1.00    1.40
  13 -15  -1   10.30    2.20
  13 -15  -1   15.90    3.30
  13  15  -1    8.40    2.20
 -13  15   1    9.60    1.70
  13  15  -1    8.70    2.30
  12 -15  -1   31.30    4.40
  12 -15  -1   30.00    3.40
  12  15  -1   31.50    3.70
 -12  15   1   33.40    2.70
  12  15  -1   30.30    3.30
  12  15  -1   32.60    4.50
  11 -15  -1   27.10    3.00
  11 -15  -1   32.70    3.60
  11  15  -1   26.30    3.00
  11  15  -1   25.20    3.70
  11  15  -1   33.30    3.60
 -11  15   1   29.90    2.40
  10 -15  -1   27.30    2.90
  10 -15  -1   22.00    3.30
  10  15  -1   28.00    3.00
  10  15  -1   25.80    3.50
  10  15  -1   29.20    3.30
 -10  15   1   25.00    2.60
   9 -15  -1    0.20    0.90
   9 -15  -1   -0.60    0.80
  -9  15   1    1.00    0.80
   9  15  -1    2.00    1.20
   9  15  -1    0.90    1.20
  -9  15   1    0.40    1.00
   9  15  -1   -0.40    0.90
  -9  15   1    0.90    0.70
   8 -15  -1  108.19    6.70
   8  15  -1  106.49    7.30
   8  15  -1  115.19    6.90
  -8  15   1  108.99    5.80
  -8  15   1  107.69    6.90
   8  15  -1  104.19    7.20
   7 -15  -1   53.79    4.10
   7 -15  -1   64.69    4.80
  -7  15   1   62.79    4.60
   7  15  -1   58.19    4.60
   7  15  -1   53.99    4.10
  -7  15   1   52.49    3.40
   7  15  -1   60.59    4.70
   6 -15  -1   72.09    5.20
   6 -15  -1   65.59    4.50
   6  15  -1   76.39    4.80
  -6  15   1   71.39    4.00
   6  15  -1   69.99    5.30
  -6  15   1   75.49    5.20
   6  15  -1   69.79    5.20
   5 -15  -1   16.60    1.90
   5  15  -1   16.30    2.50
   5  15  -1   18.00    2.70
  -5  15   1   18.80    1.50
   5  15  -1   15.50    2.10
  -5  15   1   16.60    2.50
   4 -15  -1   11.30    1.70
  -4  15   1    7.00    1.60
   4  15  -1    7.40    1.70
   4  15  -1    8.40    1.50
   4  15  -1    7.50    1.70
  -4  15   1    7.60    1.10
   3 -15  -1  427.26   20.40
   3 -15  -1  391.16   20.20
   3  15  -1  418.96   21.50
  -3  15   1  422.56   21.40
   3  15  -1  444.96   20.40
   2 -15  -1    6.30    1.30
  -2 -15   1    6.80    0.90
   2  15  -1    5.20    1.00
  -2  15   1    4.80    1.40
   2  15  -1    8.30    1.90
  -2  15   1    5.80    1.00
   1 -15  -1  115.49    6.30
  -1 -15   1  115.59    6.00
  -1  15   1  113.29    7.20
   1  15  -1  125.19    6.20
  -1  15   1  121.79    6.20
   1  15  -1  112.09    7.30
   1  15  -1  110.39    6.00
   0 -15  -1    6.70    1.10
   0 -15   1    6.70    1.10
   0  15  -1    8.60    1.30
   0  15   1    5.60    1.50
   0  15  -1    6.30    1.50
   0  15   1    7.00    1.10
   0  15   1    7.90    1.10
   0  15  -1    7.30    1.20
   1 -15   1   66.59    3.90
   1 -15   1   65.19    3.90
   1  15   1   68.09    4.10
  -1  15  -1   67.09    5.10
  -1  15  -1   76.99    3.90
   1  15   1   63.89    4.80
   2 -15   1  252.77   13.00
   2 -15   1  256.57   12.60
   2  15   1  243.58   12.10
   2  15   1  255.77   12.90
   2  15   1  251.77   13.70
  -2  15  -1  254.47   14.00
  -2  15  -1  278.17   12.30
   3 -15   1   14.90    1.70
   3  15   1   14.70    2.00
  -3  15  -1   16.20    2.70
   3  15   1   15.50    2.40
  -3  15  -1   16.30    1.20
   4 -15   1    1.80    0.90
   4  15   1    3.20    1.00
   4  15   1    1.70    0.90
  -4  15  -1    2.00    0.40
  -4  15  -1    2.10    1.20
   5 -15   1   17.30    2.30
   5  15   1   13.50    1.90
   5  15   1   16.90    2.40
   5  15   1   11.20    2.30
  -5  15  -1   13.60    2.50
   6 -15   1  236.88   12.00
   6  15   1  227.28   12.40
   6  15   1  213.08   12.00
   6  15   1  247.98   13.00
  -6  15  -1  219.88   12.80
   7 -15   1   23.70    3.50
   7 -15   1   21.10    3.40
   7  15   1   22.60    2.30
   7  15   1   18.20    3.00
   7  15   1   27.60    2.80
  -7  15  -1   25.70    3.40
   8 -15   1   11.00    2.00
   8 -15   1   15.60    2.70
  -8  15  -1    6.30    2.00
   8  15   1    8.20    1.80
   8  15   1    8.20    2.00
   8  15   1    9.80    2.20
   9 -15   1    2.10    1.00
   9 -15   1    1.80    1.00
   9  15   1    2.40    1.40
   9  15   1    2.90    1.60
   9  15   1    0.50    0.90
  10 -15   1    3.80    1.30
  10 -15   1    3.40    1.50
  10  15   1    1.70    1.70
  10  15   1    4.50    1.90
  10  15   1    2.70    1.20
  11 -15   1   69.89    5.40
  11 -15   1   74.79    6.30
  11  15   1   73.79    5.70
  11  15   1   81.69    6.30
  11  15   1   82.29    6.10
  12 -15   1    7.80    2.00
  12 -15   1    2.80    1.60
  12  15   1    7.50    2.10
  12  15   1    1.50    1.60
  12  15   1    5.00    1.50
  13 -15   1    1.90    1.90
  13 -15   1   -0.70    1.20
  13  15   1    1.30    1.60
  13  15   1    0.60    1.10
  13  15   1    2.00    1.60
  14 -16  -1    5.10    2.00
  14 -16  -1    4.30    2.20
  14  16  -1    5.80    2.20
  14  16  -1    5.90    2.10
  13 -16  -1    2.10    1.70
  13 -16  -1    1.00    1.60
  13  16  -1    2.00    1.50
 -13  16   1   -0.90    1.20
  13  16  -1    0.20    1.40
  12 -16  -1   62.89    5.50
  12 -16  -1   53.69    4.80
  12  16  -1   58.09    5.40
  12  16  -1   60.49    5.30
 -12  16   1   57.29    3.60
  12  16  -1   58.79    4.90
  11 -16  -1   97.39    6.60
  11 -16  -1   99.09    7.50
  11  16  -1  100.49    7.30
  11  16  -1  104.29    7.40
  11  16  -1   97.69    6.80
  10 -16  -1    0.60    0.80
  10 -16  -1    0.50    1.00
 -10  16   1    0.40    1.10
  10  16  -1    1.60    1.10
  10  16  -1    1.20    1.30
  10  16  -1    1.00    1.10
   9 -16  -1    1.00    1.00
   9 -16  -1    1.70    1.30
  -9  16   1    1.60    1.30
   9  16  -1    3.60    1.80
   9  16  -1    0.70    0.80
  -9  16   1    1.80    0.80
   9  16  -1    1.50    1.40
  -9  16   1    1.60    0.80
   8 -16  -1    6.60    1.60
   8 -16  -1    7.50    1.80
  -8  16   1    4.30    0.90
   8  16  -1    3.70    1.70
   8  16  -1    5.20    1.60
   8  16  -1    7.30    1.70
  -8  16   1    5.80    1.60
   7 -16  -1  204.98   11.40
   7 -16  -1  186.28   10.50
  -7  16   1  185.18    9.60
   7  16  -1  195.68   11.40
  -7  16   1  196.38   11.10
   7  16  -1  197.18   11.20
   6 -16  -1    3.50    1.10
  -6  16   1    4.40    1.50
   6  16  -1    4.00    1.50
   6  16  -1    3.50    1.40
   6  16  -1    4.40    1.20
  -6  16   1    3.80    0.90
   5 -16  -1    1.70    0.90
  -5  16   1    2.50    0.70
   5  16  -1    2.40    1.20
  -5  16   1    1.90    1.10
   5  16  -1    1.90    1.20
   5  16  -1    1.20    0.80
   4 -16  -1   89.69    5.60
  -4  16   1  100.79    6.40
   4  16  -1   96.49    5.60
   4  16  -1   93.79    6.50
   3 -16  -1   11.70    1.70
   3  16  -1    9.50    1.50
  -3  16   1   10.40    1.30
  -3  16   1    9.10    2.00
   3  16  -1   11.50    2.20
   2 -16  -1  111.29    6.20
   2  16  -1  122.09    6.20
  -2  16   1  115.69    6.00
   2  16  -1  101.59    7.10
  -2  16   1   96.89    6.90
  -1 -16   1    1.30    0.50
   1 -16  -1    0.20    0.50
   1  16  -1    0.90    0.60
  -1  16   1    0.20    0.80
   1  16  -1    1.10    0.90
   1  16  -1    0.30    0.70
  -1  16   1    0.90    0.60
   0 -16  -1   24.90    2.00
   0 -16   1   28.60    2.40
   0  16  -1   17.80    2.80
   0  16  -1   22.30    1.90
   0  16  -1   27.60    1.90
   0  16   1   22.00    1.80
   0  16   1   23.70    2.00
   0  16   1   26.30    2.70
   1 -16   1   83.89    4.60
   1 -16   1   72.99    4.50
  -1  16  -1   76.09    5.70
  -1  16  -1   89.39    4.40
   1  16   1   77.89    5.50
   1  16   1   74.99    4.20
   1  16   1   79.39    4.70
   2 -16   1  126.79    6.70
   2 -16   1  114.49    6.50
   2  16   1  129.89    6.90
  -2  16  -1  136.69    6.40
   2  16   1  122.29    7.70
   2  16   1  116.09    6.10
  -2  16  -1  130.89    8.00
   3 -16   1   54.99    3.50
   3 -16   1   48.70    3.00
  -3  16  -1   58.09    3.00
   3  16   1   52.09    4.30
   3  16   1   49.40    3.50
  -3  16  -1   51.99    4.50
   4 -16   1    2.60    1.00
   4  16   1    3.10    1.10
  -4  16  -1    4.40    1.50
  -4  16  -1    4.00    0.60
   4  16   1    3.10    1.30
   5 -16   1    0.40    0.80
   5  16   1    0.20    0.90
   5  16   1    0.10    0.90
  -5  16  -1    1.20    0.90
   5  16   1    0.70    1.00
   6 -16   1   10.30    1.90
  -6  16  -1    7.60    1.90
   6  16   1    2.90    1.90
   6  16   1    6.70    1.60
   6  16   1    5.60    1.60
   7 -16   1  172.18    9.50
   7 -16   1  163.68   10.30
  -7  16  -1  171.18   10.40
   7  16   1  166.48    9.60
   7  16   1  185.18   10.20
   8 -16   1   70.19    4.90
   8 -16   1   68.89    5.60
  -8  16  -1   68.79    5.60
   8  16   1   66.69    5.20
   8  16   1   65.89    5.40
   8  16   1   69.19    4.90
   9 -16   1    4.40    1.50
   9 -16   1    0.80    1.10
   9  16   1    0.30    0.90
   9  16   1   -0.50    1.20
   9  16   1    3.00    1.30
  10 -16   1   88.89    5.90
  10 -16   1   82.49    6.70
  10  16   1   85.39    6.10
  10  16   1   88.69    6.70
  10  16   1   84.79    6.60
  11 -16   1    0.40    1.20
  11 -16   1    0.60    1.10
  11  16   1    0.10    1.10
  11  16   1    1.10    1.20
  11  16   1   -0.50    1.30
  12 -16   1   47.50    5.10
  12  16   1   38.90    5.00
  12  16   1   48.70    4.80
  12  16   1   52.49    4.50
  13 -16   1    8.80    2.30
  13 -16   1    9.70    2.60
  13  16   1    5.20    2.10
  13  16   1    8.60    2.20
  13  16   1    7.70    2.00
  13 -17  -1    9.10    3.70
  13 -17  -1    6.30    2.00
  13  17  -1    7.50    2.40
  13  17  -1    7.70    1.90
  13  17  -1    6.20    2.10
  12 -17  -1   22.80    3.90
  12 -17  -1   23.20    3.50
  12  17  -1   23.20    3.60
  12  17  -1   25.00    3.70
  12  17  -1   23.00    3.70
  11 -17  -1   33.10    4.70
  11 -17  -1   28.40    3.20
  11  17  -1   29.70    4.10
  11  17  -1   30.50    4.20
  11  17  -1   33.90    3.50
 -11  17   1   28.80    2.80
  10 -17  -1   37.70    4.20
  10 -17  -1   40.50    3.60
  10  17  -1   47.10    4.40
  10  17  -1   41.70    4.20
 -10  17   1   33.00    2.60
  10  17  -1   42.80    3.80
   9 -17  -1    1.00    1.10
   9 -17  -1    2.30    1.20
   9  17  -1   -0.30    1.20
  -9  17   1    1.10    0.80
   9  17  -1    0.40    1.20
  -9  17   1    3.80    1.40
  -9  17   1    0.00    0.60
   9  17  -1    1.60    1.00
   8 -17  -1  201.58   11.20
   8 -17  -1  207.38   12.10
   8  17  -1  178.78   11.10
  -8  17   1  203.78   11.70
  -8  17   1  213.38   10.10
   8  17  -1  204.28   12.10
   8  17  -1  214.18   12.00
   7 -17  -1  148.59    9.70
   7 -17  -1  175.48   12.90
   7  17  -1  157.98    9.70
   7  17  -1  151.48    9.80
  -7  17   1  149.59    7.90
  -7  17   1  174.08    9.70
   7  17  -1  159.48    9.10
   6 -17  -1   20.20    2.60
  -6  17   1   13.80    2.50
   6  17  -1   15.20    2.70
  -6  17   1   15.10    1.50
   6  17  -1   17.50    2.40
   6  17  -1   15.70    2.60
   5 -17  -1  102.39    6.20
   5  17  -1   95.09    6.90
   5  17  -1   97.69    6.70
  -5  17   1  110.09    7.10
   5  17  -1  112.09    6.30
   4 -17  -1    9.40    1.70
   4  17  -1    7.40    1.90
  -4  17   1    9.20    1.30
   4  17  -1    7.70    1.50
  -4  17   1    8.20    1.90
   3 -17  -1  123.79    6.90
   3  17  -1  126.79    8.10
  -3  17   1  111.49    6.40
   3  17  -1  128.89    6.90
  -3  17   1  127.69    7.90
  -2 -17   1    2.80    0.70
   2 -17  -1    2.60    0.90
   2  17  -1    2.60    1.30
   2  17  -1    2.90    0.70
   2  17  -1    2.30    0.90
  -2  17   1    3.20    1.30
  -2  17   1    3.00    0.80
   1 -17  -1    7.30    1.30
  -1 -17   1    9.40    1.20
   1  17  -1    7.90    1.90
  -1  17   1    8.30    2.00
   1  17  -1    8.40    1.30
  -1  17   1    8.60    1.40
   1  17  -1    8.40    1.30
   0 -17  -1  386.26   19.30
   0 -17   1  401.26   19.10
   0  17   1  409.26   19.30
   0  17  -1  389.26   20.70
   0  17   1  374.76   20.50
   0  17  -1  422.36   19.10
   1 -17   1    5.90    1.10
   1  17   1    4.60    0.90
   1  17   1    3.20    1.30
  -1  17  -1    6.10    1.00
   1  17   1    4.00    0.90
  -1  17  -1    6.60    1.80
   2 -17   1   26.70    2.10
   2 -17   1   30.80    2.40
   2  17   1   26.70    2.30
  -2  17  -1   35.90    3.40
   2  17   1   26.00    1.80
   2  17   1   27.70    3.10
  -2  17  -1   31.30    2.00
   3 -17   1  133.59    7.30
  -3  17  -1  144.39    6.70
   3  17   1  133.19    8.40
  -3  17  -1  125.09    8.50
   3  17   1  128.79    7.40
   4 -17   1    8.00    1.50
  -4  17  -1    6.70    0.80
   4  17   1    7.30    1.40
   4  17   1    5.60    1.70
  -4  17  -1    5.30    1.80
   5 -17   1    1.10    0.80
   5  17   1    2.00    1.00
   5  17   1    1.10    1.00
  -5  17  -1    3.40    1.60
   6 -17   1   59.69    4.30
   6  17   1   51.79    4.10
   6  17   1   54.69    5.30
   6  17   1   59.29    4.60
  -6  17  -1   60.29    5.00
   7 -17   1   16.20    2.90
   7 -17   1   11.20    2.00
   7  17   1   12.50    2.20
   7  17   1   11.90    2.10
   7  17   1   13.20    2.50
  -7  17  -1   13.00    2.60
   8 -17   1   65.59    4.70
   8 -17   1   64.59    5.50
   8  17   1   67.19    5.30
  -8  17  -1   71.99    5.70
   8  17   1   67.29    4.90
   8  17   1   66.69    5.50
   9 -17   1    1.30    1.30
   9 -17   1    0.30    0.90
   9  17   1    0.30    1.30
   9  17   1   -0.20    1.10
   9  17   1    2.60    1.50
  10 -17   1    9.50    2.30
  10 -17   1    7.50    1.90
  10  17   1   10.00    2.20
  10  17   1   11.00    2.40
  10  17   1   12.00    2.70
  11 -17   1   77.89    5.80
  11 -17   1   76.99    6.70
  11  17   1   80.19    6.10
  11  17   1   75.09    6.30
  11  17   1   87.99    6.40
  12 -17   1    7.00    2.70
  12 -17   1    8.10    2.30
  12  17   1    8.70    2.00
  12  17   1    9.70    2.20
  13 -17   1    1.30    1.40
  13 -17   1    5.30    2.00
  13  17   1    5.00    1.80
  13  17   1    2.30    1.90
  13  17   1    5.80    1.80
  13 -18  -1   10.00    2.60
  13 -18  -1   10.40    2.40
  13  18  -1   10.10    2.30
  13  18  -1    6.80    2.10
  13  18  -1    9.10    2.30
  12 -18  -1   18.00    3.00
  12 -18  -1   20.90    3.70
  12  18  -1   23.60    3.70
  12  18  -1   26.40    3.70
  12  18  -1   17.30    2.90
  11 -18  -1   35.60    4.80
  11 -18  -1   29.10    3.30
  11  18  -1   36.10    4.10
 -11  18   1   29.20    2.20
  11  18  -1   30.70    3.40
  11  18  -1   29.40    4.30
  10 -18  -1    2.70    1.50
  10 -18  -1    8.00    1.80
  10  18  -1    4.60    2.20
 -10  18   1    4.70    0.90
  10  18  -1    4.20    1.30
  10  18  -1    5.10    1.90
   9 -18  -1   40.90    4.10
   9 -18  -1   36.30    3.40
   9  18  -1   39.90    3.60
  -9  18   1   37.20    2.50
  -9  18   1   35.70    2.50
   9  18  -1   37.40    4.00
  -9  18   1   40.00    3.90
   9  18  -1   36.50    4.00
   8 -18  -1   57.39    4.50
   8 -18  -1   56.79    5.10
   8  18  -1   57.19    4.50
   8  18  -1   54.79    5.40
  -8  18   1   65.99    5.10
   8  18  -1   60.89    5.30
  -8  18   1   62.59    3.50
   7 -18  -1   33.80    3.60
   7 -18  -1   33.20    3.10
  -7  18   1   33.40    2.30
  -7  18   1   33.80    3.60
   7  18  -1   30.80    3.50
   7  18  -1   38.00    3.90
   7  18  -1   29.10    3.00
   6 -18  -1    2.10    1.00
   6  18  -1    1.00    1.20
   6  18  -1    2.40    1.40
  -6  18   1    3.80    1.50
   5 -18  -1    3.30    1.20
  -5  18   1    0.10    0.50
  -5  18   1   -0.30    1.10
   5  18  -1    0.30    0.60
   5  18  -1    1.10    1.20
   4 -18  -1  233.08   12.20
  -4  18   1  228.38   13.10
  -4  18   1  233.08   11.60
   4  18  -1  231.68   13.40
   4  18  -1  240.98   12.20
   3 -18  -1   98.49    6.00
   3  18  -1  104.79    5.90
  -3  18   1  101.49    7.00
   3  18  -1   96.69    7.00
  -3  18   1  103.49    5.60
  -2 -18   1    1.60    0.60
   2 -18  -1    3.00    1.00
  -2  18   1    4.50    1.50
   2  18  -1    4.20    1.00
   2  18  -1    3.80    0.70
   2  18  -1    3.10    1.20
  -2  18   1    3.10    0.90
  -1 -18   1  210.78   10.50
   1 -18  -1  209.98   10.90
  -1  18   1  226.58   10.80
   1  18  -1  200.78   10.50
   1  18  -1  212.08   12.30
  -1  18   1  211.88   12.20
   1  18  -1  215.68   10.80
   0 -18  -1  206.28   11.00
   0 -18   1  210.28   10.80
   0  18   1  223.58   11.00
   0  18   1  198.88   12.20
   0  18  -1  231.98   10.90
   0  18  -1  227.68   12.70
   1 -18   1   20.90    1.90
  -1  18  -1   25.40    3.70
  -1  18  -1   22.50    1.70
   1  18   1   16.30    1.60
   1  18   1   19.20    1.90
   1  18   1   15.70    2.80
   2 -18   1    0.80    0.60
   2 -18   1    0.80    0.70
   2  18   1    0.60    0.70
   2  18   1    0.20    0.70
  -2  18  -1   -0.10    0.80
  -2  18  -1    0.80    0.50
   3 -18   1    6.80    1.40
   3 -18   1    7.10    1.10
   3  18   1    4.40    1.20
  -3  18  -1    8.80    2.20
   3  18   1    6.30    1.80
  -3  18  -1    7.90    1.00
   4 -18   1  117.99    6.80
  -4  18  -1  119.49    8.00
  -4  18  -1  130.49    6.00
   4  18   1  115.69    6.90
   4  18   1  109.69    7.80
   5 -18   1    5.80    1.40
  -5  18  -1    4.20    1.90
   5  18   1    3.40    1.60
  -5  18  -1    4.80    0.50
   6 -18   1    5.20    1.50
   6  18   1    4.70    1.40
   6  18   1    6.00    1.70
  -6  18  -1    4.00    1.80
   7 -18   1  192.08   11.60
   7 -18   1  191.18   10.60
   7  18   1  199.08   11.30
  -7  18  -1  194.38   11.70
   7  18   1  195.18   10.90
   7  18   1  195.68   11.80
   8 -18   1   13.20    2.70
   8 -18   1   18.50    2.70
   8  18   1   19.40    2.80
   8  18   1   16.50    2.80
  -8  18  -1   18.20    3.30
   8  18   1   18.90    2.70
   9 -18   1   21.90    3.50
   9 -18   1   14.00    2.40
   9  18   1   17.50    2.70
   9  18   1   16.50    3.00
  10 -18   1   17.60    2.70
  10 -18   1   26.60    3.90
  10  18   1   25.00    3.60
  10  18   1   18.40    2.90
  10  18   1   15.90    3.00
  11 -18   1    0.60    1.20
  11 -18   1   -0.10    1.20
  11  18   1    0.10    1.50
  11  18   1   -1.20    1.00
  11  18   1   -0.90    1.10
  12 -18   1   19.00    3.00
  12  18   1   22.70    3.30
  12  18   1   22.40    3.60
  12  18   1   27.20    4.00
  13 -19  -1   -1.70    1.30
  13 -19  -1    0.60    1.30
  13  19  -1   -0.60    1.50
  13  19  -1   -1.00    1.10
  13  19  -1   -0.10    1.50
  12 -19  -1   12.40    2.70
  12  19  -1   17.70    3.20
  12  19  -1   17.20    3.00
  11 -19  -1   12.10    2.20
  11 -19  -1   14.90    3.10
  11  19  -1   12.60    2.40
  11  19  -1   12.20    2.70
  11  19  -1   12.70    2.60
  10 -19  -1    1.30    1.10
  10 -19  -1    0.20    1.00
  10  19  -1    0.40    1.00
 -10  19   1   -3.20    1.10
  10  19  -1    2.50    1.70
 -10  19   1    0.20    0.70
  10  19  -1   -0.20    1.30
   9 -19  -1   26.90    3.80
   9 -19  -1   31.70    3.30
   9  19  -1   36.80    4.10
  -9  19   1   29.10    2.10
   9  19  -1   34.90    3.40
  -9  19   1   35.30    2.60
  -9  19   1   26.40    3.70
   9  19  -1   38.00    4.00
   8 -19  -1   34.70    3.40
   8 -19  -1   40.20    4.20
   8  19  -1   38.20    4.20
  -8  19   1   43.20    2.60
   8  19  -1   46.10    4.30
   8  19  -1   44.30    3.70
  -8  19   1   40.10    4.10
   7 -19  -1   34.30    3.10
   7 -19  -1   36.70    3.80
   7  19  -1   31.00    4.20
  -7  19   1   30.00    3.50
   7  19  -1   30.50    3.90
   7  19  -1   28.70    3.00
  -6  19   1    1.10    1.40
   6  19  -1    2.00    0.90
   6  19  -1    0.90    1.10
  -6  19   1    0.80    0.60
   5 -19  -1   89.69    5.60
  -5  19   1   90.49    6.60
  -5  19   1   83.29    4.80
   5  19  -1   81.99    6.60
   5  19  -1   94.39    5.70
   4 -19  -1  237.98   12.20
   4  19  -1  233.48   12.20
  -4  19   1  227.78   11.50
  -4  19   1  228.68   13.20
   4  19  -1  230.18   13.50
   3 -19  -1    0.10    0.70
   3  19  -1    0.00    0.60
  -3  19   1   -1.20    0.80
  -3  19   1    0.20    0.60
   3  19  -1   -0.40    0.90
   2 -19  -1    1.30    0.80
  -2  19   1    0.80    0.70
  -2  19   1    0.70    1.00
   2  19  -1    1.20    1.10
   2  19  -1    0.30    0.60
   2  19  -1    1.20    0.80
   1 -19  -1   29.20    2.50
  -1 -19   1   31.70    2.20
  -1  19   1   26.90    3.20
   1  19  -1   31.40    2.40
  -1  19   1   35.10    2.50
   1  19  -1   26.30    3.80
   1  19  -1   28.40    2.20
   0 -19   1  154.18    8.10
   0 -19  -1  156.58    8.30
   0  19  -1  163.18    8.10
   0  19   1  156.68    8.30
   0  19   1  159.08    9.80
   0  19  -1  135.09    9.50
   1 -19   1  171.88    9.10
  -1  19  -1  167.98   10.70
   1  19   1  168.48   10.60
  -1  19  -1  193.88    9.00
   1  19   1  182.48    9.30
   1  19   1  164.38    8.80
   2 -19   1   32.90    2.70
   2  19   1   31.10    3.50
  -2  19  -1   37.80    3.90
  -2  19  -1   36.40    2.40
   2  19   1   40.00    2.90
   3 -19   1  189.18   10.40
   3 -19   1  213.88   10.90
  -3  19  -1  222.28   10.20
  -3  19  -1  194.88   12.30
   3  19   1  212.48   12.30
   3  19   1  219.58   11.10
   4 -19   1    6.30    1.50
   4  19   1    4.50    1.20
  -4  19  -1    5.40    1.90
  -4  19  -1    5.80    0.80
   4  19   1    7.50    1.90
   5 -19   1   59.29    4.10
   5  19   1   53.29    4.10
  -5  19  -1   58.69    5.10
  -5  19  -1   60.59    3.00
   5  19   1   58.19    5.10
   6 -19   1    1.60    1.00
   6  19   1    0.70    0.90
  -6  19  -1    0.90    1.30
   6  19   1    0.40    0.90
   7 -19   1   44.40    4.30
   7 -19   1   38.30    3.40
   7  19   1   36.10    3.80
   7  19   1   49.90    4.50
   7  19   1   38.80    3.50
  -7  19  -1   31.60    3.80
   8 -19   1  125.59    8.40
   8 -19   1  110.79    7.10
   8  19   1  112.89    7.30
   8  19   1  120.99    7.90
   8  19   1  106.29    8.00
   9 -19   1    1.60    1.20
   9 -19   1    2.60    1.30
   9  19   1    0.40    0.90
   9  19   1    1.60    1.70
  -9  19  -1    1.40    1.60
   9  19   1    4.70    1.80
  10 -19   1   17.40    3.20
  10 -19   1   12.20    2.40
  10  19   1   20.20    3.10
  10  19   1   11.80    2.70
  10  19   1   17.20    2.90
  11 -19   1   17.10    2.80
  11 -19   1   21.70    3.90
  11  19   1   18.00    3.30
  11  19   1   23.40    3.60
  11  19   1   22.90    3.80
  12 -19   1    0.20    1.40
  12 -19   1    0.40    1.10
  12  19   1    0.90    1.60
  12  19   1    0.60    1.30
  12  19   1    2.00    1.80
  12 -20  -1   -0.30    1.10
  12 -20  -1    1.80    1.70
  12  20  -1    2.20    1.40
  12  20  -1    0.10    1.50
  12  20  -1   -1.80    1.50
  11 -20  -1    5.80    2.00
  11 -20  -1    4.90    1.70
  11  20  -1    5.70    1.90
  11  20  -1    7.10    2.40
  11  20  -1    8.70    2.50
  10 -20  -1   15.50    2.70
  10 -20  -1   20.40    3.60
  10  20  -1   12.70    2.70
  10  20  -1   11.60    2.50
 -10  20   1   17.00    2.80
  10  20  -1   12.50    2.80
   9 -20  -1   14.80    2.50
   9 -20  -1   18.10    3.20
  -9  20   1   15.10    1.50
  -9  20   1   18.20    3.10
   9  20  -1   14.40    2.50
   9  20  -1   20.80    3.50
   9  20  -1   18.60    3.50
   8 -20  -1  129.79    8.10
   8 -20  -1  135.59    9.10
  -8  20   1  130.69    6.80
   8  20  -1  132.29    9.20
  -8  20   1  134.09    8.80
   8  20  -1  135.29    8.30
   8  20  -1  140.69    9.00
   7 -20  -1    7.40    1.80
   7 -20  -1    5.20    1.80
  -7  20   1    4.40    1.70
   7  20  -1    6.00    2.00
   7  20  -1    5.30    1.50
   6 -20  -1   18.20    2.20
   6  20  -1   18.80    3.30
  -6  20   1   22.10    1.80
   6  20  -1   22.00    2.40
  -6  20   1   26.00    3.80
   5 -20  -1   36.50    3.30
  -5  20   1   38.70    2.60
   5  20  -1   42.70    4.30
  -5  20   1   35.90    4.10
   4 -20  -1  151.58    8.60
  -4  20   1  158.08    8.00
  -4  20   1  156.58    9.70
   4  20  -1  144.89    8.50
   3 -20  -1  124.89    7.40
  -3  20   1  129.49    6.90
   3  20  -1  142.09    7.50
  -3  20   1  120.99    8.50
   3  20  -1  129.89    8.80
   2 -20  -1   13.20    2.00
  -2  20   1   13.00    1.70
   2  20  -1   10.20    2.30
   2  20  -1   10.30    1.70
  -2  20   1   14.90    2.80
   1 -20  -1  321.37   15.90
  -1  20   1  331.67   15.80
   1  20  -1  306.37   15.60
   1  20  -1  353.46   15.90
  -1  20   1  298.07   17.30
   1  20  -1  294.57   17.40
   0 -20   1  122.09    6.60
   0 -20  -1  115.09    6.70
   0  20   1  110.89    6.60
   0  20  -1  125.69    8.30
   0  20   1  122.69    8.20
   0  20  -1  125.09    6.60
   1 -20   1    9.00    1.50
  -1  20  -1    5.60    1.70
   1  20   1   10.70    1.70
   1  20   1    8.90    2.20
  -1  20  -1   11.40    1.50
   2 -20   1   12.90    1.80
  -2  20  -1   12.50    1.50
   2  20   1    8.50    1.60
   2  20   1    8.30    2.00
   2  20   1   10.40    1.50
  -2  20  -1    8.50    2.20
   3 -20   1   41.00    3.10
   3 -20   1   45.90    3.40
  -3  20  -1   48.10    4.80
   3  20   1   51.69    3.70
  -3  20  -1   54.79    3.00
   4 -20   1  406.76   20.90
  -4  20  -1  417.26   22.60
   4  20   1  410.06   21.10
   4  20   1  424.36   22.60
  -4  20  -1  461.85   20.00
  -5  20  -1   19.10    1.20
   5  20   1   18.60    2.50
  -5  20  -1   22.60    3.70
   5  20   1   16.40    2.80
   6 -20   1    4.00    1.30
  -6  20  -1    6.20    2.10
   6  20   1    4.30    1.90
   6  20   1    3.50    1.30
   7 -20   1   78.29    6.20
   7 -20   1   76.49    5.30
   7  20   1   73.89    5.30
   7  20   1   71.89    6.10
   8 -20   1    4.70    1.70
   8 -20   1    6.80    1.80
   8  20   1    5.60    1.70
  -8  20  -1    6.60    2.10
   8  20   1    6.60    2.00
   8  20   1    6.40    2.10
   9 -20   1   41.60    4.40
   9 -20   1   42.40    3.80
  -9  20  -1   44.50    4.70
   9  20   1   38.50    4.20
   9  20   1   40.40    3.90
   9  20   1   43.00    4.40
  10 -20   1   -0.10    1.20
  10 -20   1   -0.20    1.10
  10  20   1    2.20    1.70
  10  20   1   -0.10    1.40
  10  20   1    0.00    1.30
  11 -20   1    0.00    1.80
  11 -20   1   -0.40    1.20
  11  20   1    0.30    1.30
  11  20   1    3.80    1.90
  11  20   1    1.60    1.50
  12 -20   1   17.00    3.10
  12 -20   1   15.90    3.20
  12  20   1   18.70    3.00
  12  20   1   14.10    3.10
  12 -21  -1   11.90    2.60
  12 -21  -1   21.10    3.80
  12  21  -1   11.40    2.60
  12  21  -1   23.00    4.00
  12  21  -1   19.10    3.60
  11 -21  -1    9.10    2.10
  11 -21  -1   10.50    2.60
  11  21  -1   11.00    2.70
  11  21  -1   15.10    3.10
  11  21  -1   11.10    3.10
  10 -21  -1    1.90    1.10
  10 -21  -1    1.00    1.20
  10  21  -1    2.60    1.60
 -10  21   1    1.10    1.50
  10  21  -1    1.70    1.20
  10  21  -1   -0.10    1.40
   9 -21  -1   22.90    3.50
   9 -21  -1   30.20    3.20
  -9  21   1   29.30    4.70
   9  21  -1   25.80    3.90
  -9  21   1   25.10    1.80
   9  21  -1   34.90    3.40
   9  21  -1   29.50    4.30
   8 -21  -1   10.40    2.20
   8 -21  -1   15.70    3.20
   8  21  -1   12.10    2.30
   8  21  -1    8.10    2.30
  -8  21   1   11.40    2.60
  -8  21   1    9.80    1.20
   8  21  -1   10.50    2.70
   7 -21  -1   11.30    2.50
   7 -21  -1   11.60    2.20
   7  21  -1   11.90    2.10
   7  21  -1    9.40    2.50
  -7  21   1    9.20    1.80
  -7  21   1   11.80    2.60
   6 -21  -1    2.30    1.10
  -6  21   1    4.60    1.80
   6  21  -1   -0.60    1.10
  -6  21   1    2.60    0.80
   6  21  -1    3.40    1.40
   5 -21  -1  142.29    8.60
   5  21  -1  151.08    8.40
  -5  21   1  138.09    9.40
   5  21  -1  136.19    9.60
  -5  21   1  145.19    7.50
   4 -21  -1  154.68    9.20
   4  21  -1  170.98    9.30
  -4  21   1  167.18   10.40
   4  21  -1  164.98   10.70
  -4  21   1  172.58    8.60
   3 -21  -1   27.50    2.70
   3  21  -1   30.40    4.50
   3  21  -1   29.40    2.60
  -3  21   1   29.60    4.30
  -3  21   1   30.70    2.40
   2 -21  -1   12.70    2.00
  -2  21   1   10.70    2.50
   2  21  -1   15.30    2.00
  -2  21   1   17.10    1.70
   1 -21  -1    4.30    1.20
  -1 -21   1    3.90    1.00
  -1  21   1    5.30    1.80
  -1  21   1    2.90    1.00
   1  21  -1    4.60    1.90
   1  21  -1    5.60    1.40
   0 -21  -1  258.37   13.70
   0 -21   1  273.87   13.60
   0  21  -1  291.77   13.70
   0  21  -1  252.37   15.50
   0  21   1  283.17   13.80
   0  21   1  272.27   15.50
   1 -21   1  117.69    6.90
  -1  21  -1  126.99    6.70
   1  21   1  132.19    7.10
  -1  21  -1  119.19    8.50
   1  21   1  120.29    8.50
   2 -21   1    0.70    0.80
   2  21   1    0.70    1.20
   2  21   1    2.70    1.00
  -2  21  -1    2.60    1.40
   2  21   1   -0.90    0.90
  -2  21  -1    0.30    0.60
   3 -21   1  207.28   10.80
  -3  21  -1  218.78   10.50
  -3  21  -1  205.48   12.50
   3  21   1  194.08   12.20
   3  21   1  183.88   11.80
   4 -21   1   18.50    2.40
  -4  21  -1   12.90    2.80
   4  21   1   14.80    2.10
   4  21   1   13.10    2.80
  -4  21  -1   14.10    1.30
   5 -21   1  103.69    6.50
   5  21   1  102.89    7.70
  -5  21  -1  116.69    5.40
   5  21   1  103.19    6.70
   6 -21   1   13.00    2.20
   6  21   1   12.40    2.10
  -6  21  -1   12.20    2.80
   6  21   1   13.30    2.70
   7 -21   1    6.20    2.20
   7 -21   1    5.40    1.50
  -7  21  -1    5.90    2.10
   7  21   1    2.00    1.30
   7  21   1    7.10    1.70
   8 -21   1   66.49    5.70
   8 -21   1   60.09    4.70
  -8  21  -1   64.39    5.80
   8  21   1   58.49    5.50
   8  21   1   59.29    4.80
   9 -21   1    0.20    1.10
   9 -21   1   -1.60    1.00
  -9  21  -1    0.10    1.50
   9  21   1    1.50    1.60
   9  21   1    0.70    1.30
   9  21   1    0.80    1.00
  10 -21   1   26.80    3.10
  10 -21   1   23.20    3.80
  10  21   1   24.00    3.90
  10  21   1   25.80    3.60
  10  21   1   17.10    3.20
  11 -21   1    9.00    2.20
  11 -21   1    4.20    1.60
  11  21   1    5.70    2.00
  11  21   1    6.60    2.60
  11  21   1    4.70    2.00
  11 -22  -1    0.20    1.20
  11 -22  -1    0.40    1.40
  11  22  -1   -0.60    1.30
  11  22  -1    0.70    1.30
  11  22  -1    3.00    1.70
  10 -22  -1   26.40    3.80
  10 -22  -1   30.10    4.50
  10  22  -1   43.50    4.40
 -10  22   1   32.50    4.40
  10  22  -1   28.70    3.90
  10  22  -1   32.30    4.90
   9 -22  -1    0.90    1.10
   9 -22  -1    2.90    1.30
   9  22  -1    0.30    0.90
   9  22  -1   -0.90    1.40
   9  22  -1   -1.30    1.50
  -9  22   1    1.20    1.60
   8 -22  -1   16.90    3.20
   8 -22  -1   17.40    2.80
   8  22  -1   17.90    2.80
  -8  22   1   14.60    1.50
   8  22  -1   15.50    3.50
  -8  22   1   19.70    3.20
   7 -22  -1    8.60    2.30
   7 -22  -1    9.80    2.00
   7  22  -1   10.90    2.20
  -7  22   1    8.00    1.20
   7  22  -1    9.90    2.80
   6 -22  -1   16.00    2.60
  -6  22   1   16.20    3.10
   6  22  -1   15.60    2.40
  -6  22   1   16.30    1.50
   6  22  -1   14.70    3.40
   5 -22  -1  113.59    7.00
  -5  22   1  113.49    6.00
   5  22  -1  110.99    6.80
  -5  22   1   99.69    7.70
   5  22  -1  108.99    8.20
   4 -22  -1   91.09    6.00
   4  22  -1   95.79    7.50
  -4  22   1   94.49    5.30
   4  22  -1   95.79    6.50
  -4  22   1   98.69    7.30
   3 -22  -1   20.50    2.70
  -3  22   1   14.70    3.10
  -3  22   1   19.40    1.80
   3  22  -1   18.70    2.40
   3  22  -1   15.70    3.10
   2 -22  -1    9.70    1.70
   2  22  -1    9.70    1.60
  -2  22   1    8.80    1.50
   2  22  -1   11.00    2.50
  -2  22   1    4.80    2.00
   1 -22  -1  175.98   10.00
  -1 -22   1  190.18    9.60
   1  22  -1  190.88   11.90
   1  22  -1  194.88    9.90
  -1  22   1  183.38   14.30
  -1  22   1  190.38    9.90
   0 -22   1   92.79    5.60
   0  22   1   85.69    7.60
   0  22  -1  103.19    5.60
   0  22  -1   89.39    7.20
   0  22   1  100.09    5.70
   1 -22   1   58.39    4.20
  -1  22  -1   68.09    4.00
   1  22   1   61.39    5.60
   1  22   1   71.39    4.40
  -1  22  -1   56.99    5.40
   2 -22   1   11.00    1.70
   2  22   1   10.00    1.80
  -2  22  -1    9.30    1.40
  -2  22  -1   11.50    2.70
   2  22   1    5.80    1.90
   2  22   1    8.10    1.40
   3 -22   1    0.40    0.90
   3  22   1    1.30    1.50
  -3  22  -1    1.10    0.70
  -3  22  -1    1.90    1.10
   3  22   1    1.10    0.90
   4 -22   1  187.18   10.90
   4  22   1  200.58   10.90
   4  22   1  207.18   12.50
  -4  22  -1  195.98   12.50
  -4  22  -1  207.48    9.80
   5 -22   1    2.40    1.20
   5  22   1    1.70    1.30
   5  22   1    1.00    1.20
  -5  22  -1    2.00    1.60
  -5  22  -1    2.30    0.50
   6 -22   1    4.80    1.60
   6  22   1    6.60    1.70
  -6  22  -1   11.00    2.60
   6  22   1    4.00    2.00
   7 -22   1   14.20    2.40
   7 -22   1   15.00    2.90
   7  22   1   13.20    2.40
  -7  22  -1   13.90    2.90
   7  22   1   12.40    2.80
   8 -22   1   17.70    2.50
   8 -22   1   12.10    2.70
  -8  22  -1   18.10    3.30
   8  22   1    9.20    2.60
   8  22   1   13.80    2.50
   9 -22   1   35.40    4.80
   9 -22   1   30.60    3.50
   9  22   1   27.60    4.30
   9  22   1   31.80    3.50
  -9  22  -1   31.40    4.60
  10  22   1   10.00    2.70
  10  22   1   13.00    2.60
  11 -22   1    2.70    1.40
  11 -22   1    1.30    1.50
  11  22   1    0.40    1.30
  11  22   1    5.00    2.00
  11  22   1    1.20    1.70
  11 -23  -1    2.40    1.40
  11 -23  -1    1.30    1.30
  11  23  -1    5.40    2.00
  11  23  -1    3.60    1.80
  10 -23  -1    3.10    1.50
  10 -23  -1    2.00    1.40
  10  23  -1    2.30    2.20
 -10  23   1    5.80    2.40
  10  23  -1    1.90    1.30
   9 -23  -1   44.40    4.10
   9 -23  -1   41.50    4.80
   9  23  -1   43.70    4.20
  -9  23   1   42.60    4.60
   9  23  -1   48.90    5.30
   8 -23  -1    0.40    1.00
   8 -23  -1    2.00    1.30
  -8  23   1   -3.20    2.30
   8  23  -1    2.20    1.30
  -8  23   1   -0.40    0.70
   8  23  -1   -1.30    1.40
   7 -23  -1   -0.70    0.90
   7 -23  -1   -0.20    0.90
   7  23  -1   -0.10    0.90
  -7  23   1    0.80    0.70
  -7  23   1    2.20    1.60
   7  23  -1   -0.20    1.40
   6 -23  -1   24.50    2.80
  -6  23   1   26.80    2.00
  -6  23   1   22.10    3.70
   6  23  -1   23.80    2.70
   6  23  -1   23.50    4.10
   5 -23  -1   15.10    2.50
  -5  23   1   11.30    1.50
   5  23  -1   18.10    3.70
   5  23  -1   11.50    2.00
  -5  23   1   10.30    2.60
   4 -23  -1   22.10    2.60
   4  23  -1   25.00    2.60
  -4  23   1   28.30    2.20
  -4  23   1   27.60    4.10
   4  23  -1   25.10    4.10
   3 -23  -1   16.70    2.40
  -3  23   1   14.70    1.80
   3  23  -1   11.50    2.60
  -3  23   1   10.40    2.80
   3  23  -1   12.50    2.10
   2 -23  -1    1.20    0.90
  -2  23   1    0.20    1.20
   2  23  -1    0.70    0.80
   2  23  -1    1.50    1.40
  -2  23   1   -0.50    0.60
  -1 -23   1   80.09    4.70
   1 -23  -1   74.29    5.00
  -1  23   1   83.59    5.00
   1  23  -1   83.29    5.00
   1  23  -1   73.59    6.50
  -1  23   1   89.19    6.80
   0 -23   1   95.09    5.60
   0  23   1   93.09    5.60
   0  23   1   89.99    7.10
   0  23  -1   98.89    7.50
   0  23  -1   95.49    5.50
   1 -23   1    1.00    0.80
   1  23   1    1.20    1.10
  -1  23  -1   -0.20    0.70
   1  23   1    0.90    0.80
  -1  23  -1    0.70    1.20
   2 -23   1   14.90    2.20
   2  23   1   10.60    2.70
   2  23   1   12.10    1.70
  -2  23  -1   12.60    1.40
  -2  23  -1   10.10    2.40
   2  23   1   14.30    2.20
   3 -23   1   14.30    2.20
  -3  23  -1   10.50    2.80
   3  23   1   13.60    2.00
   3  23   1   10.10    2.70
  -3  23  -1   12.20    1.50
   4 -23   1    7.30    1.70
  -4  23  -1   10.50    1.10
   4  23   1   11.00    2.00
   4  23   1   11.80    2.80
  -4  23  -1    7.50    2.40
   5 -23   1   54.99    4.30
  -5  23  -1   58.29    5.60
   5  23   1   58.29    4.40
   5  23   1   67.19    5.80
   6 -23   1   18.10    2.80
   6  23   1   10.40    2.10
   6  23   1   14.90    3.30
  -6  23  -1   20.40    3.90
   7 -23   1    6.30    2.00
   7 -23   1    4.10    1.40
  -7  23  -1    2.40    2.00
   7  23   1    1.70    1.20
   7  23   1    3.10    1.80
   8 -23   1   22.80    3.90
   8 -23   1   24.60    2.90
   8  23   1   21.60    3.90
   8  23   1   31.30    3.20
  -8  23  -1   31.40    4.60
   9 -23   1   18.20    3.00
   9 -23   1   25.40    3.90
  -9  23  -1   26.80    4.30
   9  23   1   21.50    3.90
   9  23   1   19.70    3.40
  10 -23   1   21.20    3.80
  10 -23   1   18.30    3.20
  10  23   1   12.80    2.70
  10  23   1   16.90    4.60
  10 -24  -1   22.70    4.10
  10  24  -1   20.00    3.20
  10  24  -1   34.50    5.20
 -10  24   1   22.10    3.80
   9 -24  -1   -2.20    1.10
   9 -24  -1    0.40    1.30
   9  24  -1    0.10    1.00
   9  24  -1    2.70    1.90
  -9  24   1    0.20    1.70
   8 -24  -1    9.30    2.50
   8 -24  -1    5.80    1.90
  -8  24   1    7.30    2.50
   8  24  -1    6.30    1.80
   8  24  -1    7.00    2.20
   7 -24  -1   35.60    4.00
   7 -24  -1   36.30    3.60
   7  24  -1   31.50    3.40
  -7  24   1   40.80    5.20
   7  24  -1   24.70    4.20
  -7  24   1   32.20    2.30
   6 -24  -1    0.70    1.00
   6  24  -1    0.40    1.10
  -6  24   1   -0.70    0.70
  -6  24   1   -0.80    1.30
   6  24  -1    2.30    1.50
   5 -24  -1   49.20    4.40
  -5  24   1   61.49    5.70
   5  24  -1   63.29    4.60
  -5  24   1   63.89    3.70
   5  24  -1   57.89    5.60
   4 -24  -1    5.90    1.80
   4  24  -1    4.70    1.40
   4  24  -1    7.00    2.30
  -4  24   1    5.40    2.20
  -4  24   1    6.40    1.20
   3 -24  -1   22.40    2.50
  -3  24   1   24.80    4.00
  -3  24   1   26.60    2.30
   3  24  -1   27.10    4.40
   3  24  -1   27.50    2.60
   2 -24  -1  122.99    7.40
  -2  24   1  115.09    8.80
   2  24  -1  121.29    9.00
   2  24  -1  129.69    7.30
  -2  24   1  128.39    7.00
  -1 -24   1    7.90    1.40
   1 -24  -1    9.90    1.70
   1  24  -1    6.50    2.10
  -1  24   1    9.90    2.60
  -1  24   1    8.80    1.50
   1  24  -1   10.10    1.70
   0 -24   1    7.20    1.40
   0  24  -1    6.70    1.40
   0  24  -1    2.60    1.70
   0  24   1    7.90    1.40
   0  24   1    6.70    2.20
   1 -24   1   35.50    3.00
  -1  24  -1   42.00    4.60
  -1  24  -1   41.80    2.90
   1  24   1   37.00    5.20
   2 -24   1   14.30    2.20
  -2  24  -1    6.50    2.30
   2  24   1   13.00    1.80
   2  24   1   14.70    2.20
  -2  24  -1   16.10    1.80
   2  24   1   11.60    3.00
   3 -24   1   30.90    2.90
   3  24   1   32.70    4.70
  -3  24  -1   32.20    2.30
  -3  24  -1   33.20    4.60
   3  24   1   36.70    3.10
   4 -24   1    0.70    1.00
   4  24   1    1.00    1.00
   4  24   1    0.20    1.30
  -4  24  -1    0.30    1.30
   5 -24   1   24.30    3.20
   5  24   1   18.90    3.60
   5  24   1   29.30    2.70
  -5  24  -1   25.90    4.30
   6 -24   1   38.10    3.50
  -6  24  -1   33.00    5.00
   6  24   1   30.10    3.20
   6  24   1   38.10    4.30
   7 -24   1    1.70    1.20
   7 -24   1   -0.50    0.90
   7  24   1    0.40    1.10
  -7  24  -1    2.00    1.80
   7  24   1   -0.50    1.50
   8 -24   1    5.50    1.80
   8 -24   1    9.00    2.10
   8  24   1    7.80    2.20
   8  24   1    4.10    2.10
  -8  24  -1    7.30    2.80
   9 -24   1   17.70    3.20
   9 -24   1   13.90    3.80
   9  24   1   12.60    4.90
  -9  24  -1   19.30    3.40
   9  24   1   18.20    3.10
  10 -24   1    5.10    1.90
  10  24   1    6.60    2.10
  10  24   1    5.30    2.50
  10 -25  -1   -0.30    1.50
  10 -25  -1    3.30    1.60
 -10  25   1   -0.90    1.70
  10  25  -1    0.60    1.50
  10  25  -1   -0.20    1.80
   9 -25  -1    8.60    2.20
   9  25  -1   10.00    2.80
  -9  25   1    9.90    2.80
   8 -25  -1   -0.30    1.20
   8 -25  -1    0.90    1.20
  -8  25   1    1.50    1.90
   8  25  -1    1.20    1.60
   8  25  -1    0.00    1.10
   7 -25  -1    5.40    1.80
   7 -25  -1    6.60    2.20
   7  25  -1    3.30    1.90
  -7  25   1    4.00    1.00
  -7  25   1    7.50    2.50
   7  25  -1    7.00    1.70
   6 -25  -1  114.59    7.50
  -6  25   1  108.69    8.50
   6  25  -1  119.49    9.20
   6  25  -1  113.49    7.40
  -6  25   1  117.29    6.20
   5 -25  -1   21.00    2.50
   5  25  -1   19.10    2.70
  -5  25   1   17.30    3.60
  -5  25   1   20.00    1.90
   5  25  -1   17.70    3.70
   4 -25  -1   21.20    3.00
   4  25  -1   22.60    4.00
   4  25  -1   19.60    2.70
  -4  25   1   19.80    1.90
  -4  25   1   20.60    3.80
   3 -25  -1   76.19    5.40
  -3  25   1   79.89    6.90
   3  25  -1   84.79    5.50
  -3  25   1   90.19    5.10
   3  25  -1   85.89    7.30
   2 -25  -1    6.70    1.60
   2  25  -1    4.70    1.60
  -2  25   1    2.90    1.90
  -2  25   1    3.20    1.10
   1 -25  -1   85.59    5.60
  -1 -25   1   83.49    5.20
   1  25  -1   93.89    5.60
  -1  25   1  101.89    5.60
  -1  25   1   90.29    7.30
   1  25  -1   81.79    7.20
   0 -25   1    3.80    0.90
   0  25   1    2.80    1.30
   0  25  -1    1.30    1.90
   0  25   1    2.90    2.00
   0  25  -1    2.20    1.00
   1 -25   1  148.79    8.30
   1  25   1  142.79    8.30
   1  25   1  150.28   10.30
  -1  25  -1  151.78   10.40
  -1  25  -1  149.59    8.00
   2 -25   1  187.48   10.60
  -2  25  -1  186.48   12.50
   2  25   1  191.58   12.70
   2  25   1  200.68   10.70
  -2  25  -1  210.18   10.10
   3  25   1    0.40    0.90
  -3  25  -1    0.40    1.40
  -3  25  -1    3.80    1.00
   3  25   1    1.60    1.30
   4 -25   1   -0.40    0.90
   4  25   1   -0.30    0.90
  -4  25  -1   -0.20    1.50
   4  25   1   -1.30    1.10
   5 -25   1   11.00    2.20
  -5  25  -1    6.70    2.70
   5  25   1   11.70    2.90
   5  25   1   12.40    2.10
   6 -25   1   29.20    3.20
   6  25   1   30.20    3.20
  -6  25  -1   31.30    4.90
   6  25   1   31.20    4.90
   7 -25   1   44.70    4.80
   7 -25   1   34.40    3.50
   7  25   1   35.80    3.60
  -7  25  -1   40.30    5.70
   7  25   1   35.70    5.30
   8 -25   1    4.40    2.40
   8 -25   1    2.70    1.50
  -8  25  -1    3.60    1.60
   8  25   1    2.60    2.00
   8  25   1    3.00    2.00
   9 -25   1    1.40    1.80
   9 -25   1    4.50    1.80
   9  25   1    5.60    1.70
   9  25   1    8.80    2.50
  -9  25  -1    4.70    2.00
   9 -26  -1    4.20    2.00
   9  26  -1    5.50    2.40
   9  26  -1    7.60    2.30
  -9  26   1   10.50    2.60
   8 -26  -1    5.70    2.00
   8 -26  -1    5.40    1.90
   8  26  -1    3.90    2.00
   8  26  -1    4.70    2.00
  -8  26   1    5.50    2.30
   7 -26  -1   49.10    4.40
   7 -26  -1   44.00    4.90
   7  26  -1   49.20    5.40
  -7  26   1   42.10    4.90
   7  26  -1   50.49    4.30
   6 -26  -1   17.80    2.80
   6  26  -1   17.20    2.90
   6  26  -1   25.60    4.60
  -6  26   1   17.40    1.80
  -6  26   1   17.30    3.70
   5 -26  -1    7.30    1.70
  -5  26   1    6.70    1.20
   5  26  -1    7.20    2.50
  -5  26   1    7.00    2.60
   5  26  -1    7.40    1.80
   4 -26  -1    5.40    1.50
   4  26  -1    1.10    1.80
   4  26  -1    3.90    1.40
  -4  26   1    6.20    1.20
  -4  26   1    8.90    2.90
  -3  26   1   93.59    5.20
   3  26  -1   82.49    7.40
   3  26  -1   86.59    5.70
  -3  26   1   82.29    7.10
   2 -26  -1  212.08   11.90
   2  26  -1  217.08   13.90
   2  26  -1  212.88   11.70
  -2  26   1  239.58   11.50
  -2  26   1  210.18   13.70
   1 -26  -1   35.60    3.10
  -1  26   1   27.30    4.40
   1  26  -1   37.80    5.40
  -1  26   1   37.50    3.00
   1  26  -1   36.00    3.00
   0 -26   1   23.10    2.30
   0  26  -1   20.90    2.20
   0  26  -1   18.20    3.70
   0  26   1   20.20    2.20
   0  26   1   19.50    3.80
   1 -26   1   39.90    3.20
  -1  26  -1   41.80    3.00
   1  26   1   39.20    4.60
  -1  26  -1   43.00    4.90
   1  26   1   45.80    3.40
   2 -26   1   15.80    2.30
  -2  26  -1   14.50    1.60
  -2  26  -1    9.60    3.10
   2  26   1   13.90    3.20
   2  26   1   11.90    2.00
   3 -26   1   90.79    6.10
   3  26   1   87.99    6.00
  -3  26  -1   94.69    7.80
   3  26   1   98.29    7.80
  -3  26  -1   97.79    5.30
   4 -26   1   11.90    2.10
   4  26   1    7.20    1.80
  -4  26  -1   11.70    1.40
   4  26   1   14.00    3.10
  -4  26  -1   15.10    3.40
   5 -26   1   53.49    4.20
  -5  26  -1   45.30    5.20
   5  26   1   48.20    4.10
   5  26   1   49.20    5.40
   6 -26   1   83.69    6.10
   6  26   1   86.09    7.60
  -6  26  -1   98.69    7.80
   6  26   1   82.59    6.10
   7 -26   1    7.60    2.30
   7 -26   1    6.70    1.70
  -7  26  -1    2.80    1.80
   7  26   1    3.30    1.50
   7  26   1    1.70    1.90
   8 -26   1    2.70    1.60
   8 -26   1    3.20    1.70
  -8  26  -1    2.60    1.70
   8  26   1    1.60    1.50
   8  26   1    5.40    2.40
   8 -27  -1    4.30    2.20
   8 -27  -1    4.40    1.70
  -8  27   1    5.20    2.40
   8  27  -1    3.70    2.70
   8  27  -1    3.40    2.20
   7 -27  -1    1.70    1.40
   7 -27  -1    9.30    2.10
   7  27  -1    2.70    1.70
  -7  27   1    0.20    1.40
  -7  27   1    1.40    1.90
   7  27  -1    2.30    1.70
   6 -27  -1  101.09    6.80
   6  27  -1   86.89    8.00
  -6  27   1  101.39    5.30
  -6  27   1   90.49    7.90
   6  27  -1   93.89    6.60
   5 -27  -1   60.59    4.90
  -5  27   1   69.29    4.00
   5  27  -1   63.89    6.30
   5  27  -1   60.89    4.90
  -5  27   1   59.49    6.10
   4 -27  -1   11.10    2.30
   4  27  -1   10.80    2.10
  -4  27   1    9.20    1.50
   4  27  -1    4.70    2.00
  -4  27   1   11.50    2.90
   3 -27  -1   49.30    4.20
   3  27  -1   51.19    4.10
   3  27  -1   48.80    5.50
  -3  27   1   56.39    3.60
  -3  27   1   53.49    5.70
   2 -27  -1    2.40    1.10
   2  27  -1    1.30    0.80
  -2  27   1    3.20    2.00
   2  27  -1    6.00    1.90
  -2  27   1    0.70    0.80
   1  27  -1   28.10    4.80
   1  27  -1   28.60    2.60
  -1  27   1   32.70    4.90
  -1  27   1   27.20    2.50
   0 -27   1   10.90    1.60
   0  27  -1   12.40    1.80
   0  27  -1    7.60    2.60
   0  27   1    8.40    2.70
   0  27   1    9.50    1.80
   1 -27   1   92.79    5.90
  -1  27  -1   87.39    7.60
   1  27   1   85.09    7.40
  -1  27  -1   97.09    5.60
   1  27   1   94.99    5.90
   2 -27   1  132.49    7.80
  -2  27  -1  134.59    7.20
   2  27   1  122.79    9.60
  -2  27  -1  118.09    9.40
   2  27   1  141.99    8.00
   3 -27   1   11.20    2.10
  -3  27  -1   14.60    3.50
  -3  27  -1   14.00    1.70
   3  27   1   13.90    2.30
   3  27   1    9.10    2.40
   4 -27   1    1.30    1.20
  -4  27  -1   -3.90    1.40
   4  27   1    0.30    1.30
   4  27   1    0.30    1.00
  -4  27  -1    0.60    0.70
   5 -27   1    6.40    1.70
  -5  27  -1    3.30    1.90
   5  27   1    5.00    1.60
   5  27   1   -0.60    1.50
   6 -27   1   55.59    4.40
  -6  27  -1   57.09    5.80
   6  27   1   40.80    6.00
   6  27   1   53.49    4.60
   7 -27   1   18.40    3.50
   7 -27   1   27.20    3.10
   7  27   1   24.50    4.30
   7  27   1   14.20    3.30
  -7  27  -1   20.90    4.10
   7 -28  -1   18.70    3.10
   7 -28  -1   26.50    4.20
  -7  28   1   17.90    3.90
   7  28  -1   18.10    4.20
   7  28  -1   24.40    3.50
   6 -28  -1    5.90    1.90
   6  28  -1    9.30    2.10
  -6  28   1    2.70    1.80
   6  28  -1    8.20    4.20
   5 -28  -1   24.20    3.30
  -5  28   1   20.20    1.90
   5  28  -1   15.90    2.60
  -5  28   1   11.30    3.20
   5  28  -1   14.60    3.30
   4 -28  -1   -0.30    1.00
  -4  28   1    1.10    0.90
   4  28  -1    0.00    1.30
   4  28  -1    0.40    1.10
  -4  28   1    0.90    1.50
   3 -28  -1   20.40    2.90
   3  28  -1   21.00    2.80
  -3  28   1   21.60    2.10
  -3  28   1   15.60    3.60
   3  28  -1   14.60    3.50
   2 -28  -1  160.08    9.10
  -2  28   1  138.79   10.60
   2  28  -1  153.18   11.10
   2  28  -1  152.58    8.80
   1  28  -1   25.80    4.60
  -1  28   1   16.90    3.90
  -1  28   1   18.70    2.20
   1  28  -1   21.20    2.30
   0 -28   1    5.50    1.40
   0  28  -1    2.10    1.30
   0  28  -1    4.00    2.20
   0  28   1    3.80    2.10
   0  28   1    3.60    1.30
   1 -28   1    4.80    1.30
  -1  28  -1    4.20    1.20
   1  28   1    3.80    1.30
  -1  28  -1    4.50    2.20
   1  28   1    4.20    2.00
   2 -28   1   31.30    5.00
   2  28   1   23.60    3.00
   2  28   1   27.80    4.70
  -2  28  -1   23.90    2.30
  -2  28  -1   19.80    4.00
   3 -28   1   26.10    2.90
  -3  28  -1   29.90    2.30
   3  28   1   26.80    4.90
   3  28   1   25.30    2.90
  -3  28  -1   20.50    4.20
   4 -28   1    1.50    1.30
  -4  28  -1    0.20    0.90
   4  28   1    3.40    1.60
   4  28   1    1.60    1.30
  -4  28  -1   -1.00    1.40
   5 -28   1   37.10    3.70
   5  28   1   32.40    6.20
  -5  28  -1   38.00    5.60
   5  28   1   29.70    3.40
   6 -28   1   23.20    2.70
   6  28   1   15.90    3.80
   6  28   1   20.10    4.00
  -6  28  -1   18.90    3.60
   7 -28   1   21.70    3.20
   7 -28   1   23.80    4.10
   7  28   1   14.50    3.50
   7  28   1   14.60    2.90
  -7  28  -1   21.10    4.10
   6 -29  -1   22.20    3.30
  -6  29   1   15.80    3.60
   6  29  -1   18.10    3.70
   6  29  -1   12.70    2.40
   5 -29  -1   -0.20    1.10
   5  29  -1   -1.50    1.80
  -5  29   1    0.00    1.70
  -5  29   1    0.10    1.00
   5  29  -1    0.40    1.00
   4 -29  -1   -0.50    1.20
   4  29  -1   -0.20    1.00
  -4  29   1    0.20    1.00
  -4  29   1    1.90    1.80
   4  29  -1    0.90    2.10
   3 -29  -1   22.10    3.10
  -3  29   1   20.20    3.90
   3  29  -1   21.50    2.90
  -3  29   1   19.40    2.40
   3  29  -1   15.40    3.20
   2 -29  -1    5.50    1.80
  -2  29   1    4.00    1.70
   2  29  -1    4.90    1.50
  -2  29   1    6.80    1.30
   2  29  -1    4.70    2.10
   1  29  -1   17.30    2.50
  -1  29   1   18.50    2.40
   1  29  -1   20.00    4.40
  -1  29   1   14.00    3.70
   0  29  -1    0.60    1.70
   0  29   1    0.10    1.00
   0  29  -1    2.90    1.20
   0  29   1    0.70    1.40
   1 -29   1   19.90    2.70
  -1  29  -1   22.50    2.30
   1  29   1   20.10    2.70
  -1  29  -1   20.90    4.10
   1  29   1   13.10    3.50
   2 -29   1   26.10    3.20
   2  29   1   20.00    4.00
  -2  29  -1   22.00    2.30
  -2  29  -1   24.10    4.30
   2  29   1   18.00    2.70
   3 -29   1    3.50    1.50
  -3  29  -1    2.00    1.00
   3  29   1    4.10    1.70
   3  29   1    3.30    1.40
  -3  29  -1    0.70    1.60
   4 -29   1    2.10    1.20
  -4  29  -1   -1.80    1.60
   4  29   1    1.80    1.40
   5 -29   1   10.10    2.10
  -5  29  -1    4.50    2.40
   5  29   1    4.30    2.30
   5  29   1    9.60    2.10
   6 -29   1   -0.30    1.60
  -6  29  -1   -1.40    2.00
   6  29   1    3.30    1.50
   6  29   1    2.60    1.90
   5 -30  -1   20.70    3.10
   5  30  -1   16.00    2.70
   5  30  -1   13.20    3.00
  -5  30   1   14.20    3.70
   4 -30  -1    7.60    2.10
  -4  30   1    4.70    2.60
   4  30  -1    1.80    2.00
   4  30  -1    3.10    1.60
  -4  30   1    5.80    1.40
   3 -30  -1    2.80    1.30
  -3  30   1    4.10    1.30
  -3  30   1   -0.60    2.00
   3  30  -1    1.20    1.20
   3  30  -1    3.10    1.90
   2  30  -1    3.50    1.30
  -2  30   1   -0.70    1.00
  -2  30   1    1.90    1.60
  -1  30   1   11.70    2.60
   1  30  -1    9.60    2.00
   1  30  -1    5.50    3.00
  -1  30   1    9.50    2.00
   0  30  -1    2.30    2.00
   0  30  -1    5.40    1.30
   0  30   1    4.20    1.40
   0  30   1    4.50    2.40
   1 -30   1   13.60    2.10
   1  30   1   10.50    2.00
   1  30   1   11.10    3.20
  -1  30  -1   10.00    2.80
  -1  30  -1   11.80    2.90
   2 -30   1    2.90    1.40
  -2  30  -1    3.10    2.20
   2  30   1    3.20    1.30
  -2  30  -1    1.20    1.00
   3 -30   1    3.20    1.20
   3  30   1    1.80    1.90
  -3  30  -1   -1.80    1.00
   3  30   1    4.70    1.60
  -3  30  -1   -1.30    1.70
   4 -30   1    6.00    2.10
   4  30   1    2.70    2.40
   4  30   1    6.10    1.80
  -4  30  -1    7.90    2.70
   3  31  -1    0.60    1.60
  -3  31   1    1.20    3.10
   3  31  -1    2.80    1.40
  -3  31   1    1.70    1.10
  -2  31   1    7.90    1.80
   2  31  -1    6.50    2.70
   2  31  -1    5.70    1.70
   1  31  -1   -1.40    2.20
  -1  31   1    2.90    1.20
   1  31  -1    2.80    1.40
   0  31   1   31.90    6.00
   0  31  -1   25.20    4.90
   0  31   1   34.30    3.20
   0  31  -1   37.90    3.30
   1 -31   1   38.10    3.70
  -1  31  -1   36.40    3.20
   1  31   1   48.30    5.40
  -1  31  -1   45.20    6.60
   1  31   1   41.20    3.60
   2 -31   1   13.10    2.30
  -2  31  -1   11.90    3.30
  -2  31  -1   10.90    1.80
   2  31   1   13.90    3.50
   2  31   1   15.90    2.50
  16   0  -2   19.90    2.80
  16   0  -2   11.60    2.20
  16   0  -2   15.90    3.20
  15   0  -2   20.10    2.60
  15   0  -2   20.60    3.40
  15   0  -2   27.40    3.10
  14   0  -2    5.90    1.90
  14   0  -2    5.70    1.30
  14   0  -2   11.30    1.90
  13   0  -2    1.50    1.30
  13   0  -2   -0.40    1.00
  13   0  -2   -0.70    0.70
  12   0  -2   12.90    2.10
  12   0  -2   12.60    2.80
  12   0  -2   11.90    1.70
  11   0  -2   40.00    3.80
  11   0  -2   43.30    3.20
  11   0  -2   37.10    2.70
  10   0  -2    1.00    0.70
  10   0  -2    1.10    1.00
   9   0  -2  178.78    9.70
   9   0  -2  194.78    9.50
   9   0  -2  192.08   10.60
   8   0  -2   33.50    2.80
   8   0  -2   23.20    2.10
   8   0  -2   30.50    2.00
   7   0  -2   52.79    2.90
   7   0  -2   47.90    3.10
   7   0  -2   47.00    3.60
  -6   0   2  115.39    6.10
  -6   0   2  118.49    6.10
   6   0  -2  126.39    7.10
   6   0  -2  111.49    6.00
   6   0  -2  113.49    5.80
  -5   0   2  338.97   15.50
   5   0  -2  340.27   15.40
   5   0  -2  327.17   15.10
   5   0  -2  321.17   15.90
  -5   0   2  330.27   15.80
  -5   0   2  282.17   15.40
  -4   0   2 1697.33   80.09
   4   0  -2 1810.22   79.99
   4   0  -2 1788.02   79.29
  -4   0   2 1565.14   79.39
   4   0  -2 1804.92   79.49
  -3   0   2  320.77   15.70
   3   0  -2  330.57   15.50
   3   0  -2  341.87   15.80
  -3   0   2  330.87   15.40
   3   0  -2  330.47   15.30
  -3   0   2  328.87   15.20
   2   0  -2   43.70    2.10
  -2   0   2   41.90    2.10
   2   0  -2   40.60    2.30
  -2   0   2   40.60    2.30
   2   0  -2   39.60    2.30
  -2   0   2   42.60    2.30
   1   0  -2  400.56   18.40
  -1   0   2  397.96   18.50
  -1   0   2  394.96   18.40
   0   0   2  888.41   40.50
   0   0  -2  904.31   40.70
   0   0   2  861.71   40.70
  -1   0  -2  107.49    5.20
   1   0   2  103.49    5.40
   1   0   2  106.69    5.20
   2   0   2  163.18    7.90
  -2   0  -2  171.08    8.00
  -2   0  -2  160.98    8.20
   2   0   2  161.98    8.00
   2   0   2  167.18    8.20
   3   0   2 1060.89   48.50
  -3   0  -2 1000.60   48.30
  -3   0  -2 1116.79   48.30
   3   0   2 1045.30   48.40
  -3   0  -2 1028.50   48.60
   3   0   2 1026.90   48.20
  -4   0  -2  638.04   27.60
   4   0   2  594.44   27.80
   4   0   2  572.44   27.80
   4   0   2  564.14   27.40
  -4   0  -2  595.24   27.90
  -4   0  -2  570.64   28.00
   5   0   2  257.27   12.20
   5   0   2  245.98   11.80
  -5   0  -2  235.28   12.10
   5   0   2  233.78   12.20
  -5   0  -2  245.58   11.90
   6   0   2    1.30    0.60
   6   0   2    0.80    0.60
   6   0   2    0.10    0.80
   7   0   2   16.80    1.90
   7   0   2   16.20    1.50
   7   0   2   14.60    2.10
   8   0   2  171.38    9.80
   8   0   2  180.98    9.70
   8   0   2  180.38    9.20
   9   0   2   27.90    2.70
   9   0   2   29.70    2.40
   9   0   2   27.10    2.90
  10   0   2    0.40    0.90
  10   0   2    2.20    1.20
  11   0   2   30.40    3.40
  11   0   2   31.10    3.10
  12   0   2   -0.70    1.10
  12   0   2    1.20    1.30
  13   0   2    5.10    2.10
  13   0   2    5.60    1.70
  14   0   2   14.20    2.50
  14   0   2   12.00    2.40
  15   0   2   10.10    2.00
  15   0   2    5.90    2.10
  15   0   2    9.50    2.10
  16  -1  -2    6.80    2.00
  16  -1  -2    9.30    2.70
  16  -1  -2    8.70    1.90
  16   1  -2   12.20    2.60
  16   1  -2    8.10    1.90
  16   1  -2    6.90    1.90
  15  -1  -2   21.60    3.80
  15  -1  -2   23.70    2.80
  15  -1  -2   20.70    2.40
  15   1  -2   15.90    2.20
  15   1  -2   21.30    3.60
  15   1  -2   24.40    2.90
  14  -1  -2   61.89    5.60
  14  -1  -2   59.09    4.10
  14  -1  -2   72.29    4.80
  14   1  -2   69.19    4.60
  14   1  -2   63.09    5.70
  14   1  -2   57.19    4.20
  13  -1  -2   13.80    2.20
  13  -1  -2   16.00    3.00
  13  -1  -2   12.60    1.70
  13   1  -2   11.50    1.80
  13   1  -2   14.10    2.80
  12  -1  -2    0.10    0.80
  12  -1  -2    0.70    1.10
  12  -1  -2   -0.70    0.60
  12   1  -2    1.80    1.40
  12   1  -2   -1.00    0.80
  12   1  -2    0.10    0.70
  11  -1  -2    0.90    1.00
  11  -1  -2    1.30    1.00
  11  -1  -2    2.50    0.80
  11   1  -2    2.90    1.10
  11   1  -2    1.30    0.80
  11   1  -2    2.10    1.20
  10  -1  -2   12.50    1.80
  10  -1  -2   14.70    2.50
  10   1  -2   15.30    2.60
  10   1  -2   12.60    1.40
  10   1  -2   13.00    1.80
   9  -1  -2   33.30    3.10
   9  -1  -2   33.60    2.70
   9   1  -2   38.00    3.20
   9   1  -2   35.20    2.40
   9   1  -2   31.50    2.50
   8  -1  -2  408.96   19.20
   8   1  -2  393.76   18.10
   8   1  -2  340.27   18.10
   8   1  -2  376.36   19.10
   7  -1  -2   45.50    3.30
   7  -1  -2   40.20    2.80
   7   1  -2   49.30    3.40
   7   1  -2   41.70    3.00
   7   1  -2   44.80    2.60
   6  -1  -2    5.50    1.00
  -6  -1   2    5.70    1.00
   6  -1  -2    7.80    1.30
   6   1  -2    6.80    1.50
  -6   1   2    6.40    1.00
   6   1  -2    5.20    0.90
  -6   1   2    6.40    1.00
   6   1  -2    5.90    0.80
   5  -1  -2  888.91   39.10
   5  -1  -2  805.12   39.50
  -5  -1   2  861.71   39.20
  -5   1   2  839.12   39.50
   5   1  -2  874.01   39.60
   5   1  -2  862.11   39.00
  -5   1   2  767.42   38.90
   5   1  -2  841.22   38.90
   4  -1  -2  341.47   15.50
  -4  -1   2  293.57   15.30
  -4  -1   2  345.67   15.60
   4  -1  -2  332.27   15.80
  -4   1   2  305.27   15.30
   4   1  -2  335.57   15.40
   4   1  -2  325.87   15.30
   4   1  -2  332.27   15.80
  -4   1   2  335.97   16.00
   3  -1  -2    4.20    0.70
  -3  -1   2    4.40    0.60
   3  -1  -2    4.60    0.80
  -3  -1   2    4.40    0.50
  -3  -1   2    3.80    0.70
   3   1  -2    4.60    0.60
   3   1  -2    5.40    0.70
  -3   1   2    6.40    0.90
  -3   1   2    4.90    0.60
   3   1  -2    4.70    0.80
  -2  -1   2   30.80    1.70
   2  -1  -2   28.80    1.80
   2  -1  -2   30.80    1.80
  -2  -1   2   28.60    1.70
  -2  -1   2   31.30    1.90
  -2   1   2   30.10    1.80
   2   1  -2   31.40    1.90
   2   1  -2   31.60    1.70
  -2   1   2   30.30    1.80
   1  -1  -2 1182.18   55.89
  -1  -1   2 1255.07   56.09
  -1  -1   2 1217.48   56.09
   1   1  -2 1223.78   56.09
  -1   1   2 1212.88   56.09
  -1   1   2 1190.38   55.89
   1   1  -2 1269.17   56.09
   0  -1  -2 1967.90   89.79
   0  -1   2 1935.71   89.89
   0   1  -2 1924.61   89.59
   0   1   2 2001.00   89.79
   0   1  -2 1967.20   89.89
   1  -1   2    7.80    0.60
   1  -1   2    8.00    1.10
  -1  -1  -2    7.50    0.70
   1  -1   2    8.10    0.90
   1   1   2    6.80    0.50
  -1   1  -2    6.80    0.80
   1   1   2    7.30    0.70
  -1   1  -2    7.60    0.60
   2  -1   2    0.30    0.30
   2  -1   2    0.30    0.30
  -2  -1  -2    0.20    0.30
   2  -1   2    0.10    0.20
  -2  -1  -2   -0.10    0.30
   2   1   2    0.60    0.30
  -2   1  -2    0.60    0.30
   2   1   2    0.30    0.30
   2   1   2    0.40    0.40
  -2   1  -2    0.00    0.20
   3  -1   2   68.99    3.90
  -3  -1  -2   81.79    3.90
  -3  -1  -2   69.39    3.80
   3  -1   2   72.09    4.00
   3  -1   2   62.09    3.60
   3   1   2   73.09    4.00
  -3   1  -2   72.49    3.70
   3   1   2   67.59    3.70
  -3   1  -2   72.09    4.10
   3   1   2   72.09    3.90
   4  -1   2  691.53   34.00
  -4  -1  -2  716.03   34.60
  -4  -1  -2  705.83   34.50
   4  -1   2  738.63   34.50
  -4  -1  -2  778.62   34.30
   4   1   2  733.23   34.40
   4   1   2  737.33   34.40
  -4   1  -2  721.83   34.50
   4   1   2  728.13   34.10
  -4   1  -2  795.42   34.10
   5  -1   2  206.68   10.30
   5  -1   2  191.38    9.70
   5  -1   2  198.68   10.30
  -5  -1  -2  193.58    9.90
  -5  -1  -2  203.48   10.20
   5   1   2  211.48   10.20
  -5   1  -2  201.78    9.90
   5   1   2  202.48    9.90
   5   1   2  196.08   10.20
   6  -1   2    7.80    1.20
   6  -1   2    8.00    1.50
   6  -1   2    8.70    1.40
  -6   1  -2    6.50    1.00
   6   1   2    6.70    1.20
   6   1   2    6.50    1.00
   6   1   2    9.00    1.50
   7  -1   2  288.37   14.50
   7  -1   2  309.97   15.10
   7  -1   2  308.57   15.30
   7   1   2  300.67   14.60
   7   1   2  286.97   14.90
   7   1   2  299.17   15.20
   8  -1   2   94.89    5.30
   8  -1   2   93.29    5.90
   8  -1   2   93.69    5.80
   8   1   2   91.29    5.90
   8   1   2   84.39    5.60
   8   1   2   97.49    5.40
   9  -1   2   31.20    2.90
   9  -1   2   34.30    3.20
   9   1   2   38.90    3.20
   9   1   2   33.80    3.10
   9   1   2   30.70    2.60
  10  -1   2    0.90    0.90
  10  -1   2    0.30    0.80
  10   1   2    0.40    0.90
  10   1   2   -0.10    0.90
  10   1   2    0.40    0.80
  11  -1   2    2.90    1.60
  11  -1   2    3.60    1.30
  11   1   2    3.30    1.40
  11   1   2    0.70    1.10
  12  -1   2    7.30    1.60
  12  -1   2   12.80    2.60
  12   1   2   10.60    2.00
  12   1   2    9.40    2.20
  13  -1   2   14.70    3.00
  13  -1   2   10.20    2.10
  13   1   2   12.20    2.30
  13   1   2   18.10    3.30
  14  -1   2   16.40    2.70
  14  -1   2   20.40    3.20
  14   1   2   19.90    3.40
  14   1   2   21.50    2.80
  14   1   2   22.90    3.10
  15  -1   2   14.40    3.20
  15  -1   2   15.40    2.50
  15   1   2   12.90    2.40
  15   1   2   16.90    3.10
  15   1   2   15.60    2.70
  16  -2  -2    6.90    2.10
  16  -2  -2    5.00    1.90
  16  -2  -2    3.10    1.50
  16   2  -2    6.00    1.70
  16   2  -2    3.50    2.10
  16   2  -2    6.00    1.90
  15  -2  -2   44.20    4.90
  15  -2  -2   40.70    3.30
  15  -2  -2   44.80    3.90
  15   2  -2   46.70    3.90
  15   2  -2   39.90    3.50
  15   2  -2   48.40    4.80
  14  -2  -2   -0.90    0.80
  14  -2  -2    1.00    1.20
  14  -2  -2    3.60    1.30
  14   2  -2    2.10    1.30
  14   2  -2   -0.80    0.90
  14   2  -2    1.60    1.20
  13  -2  -2    5.40    1.60
  13  -2  -2    4.80    1.10
  13  -2  -2    5.00    1.70
  13   2  -2    4.80    1.40
  13   2  -2    3.30    1.70
  13   2  -2    7.20    1.50
  12  -2  -2   26.90    2.10
  12  -2  -2   26.80    2.80
  12  -2  -2   28.40    3.30
  12   2  -2   38.80    6.20
  12   2  -2   28.80    2.70
  12   2  -2   27.40    2.40
  11  -2  -2    1.90    1.20
  11  -2  -2    1.60    1.20
  11   2  -2    1.00    0.80
  11   2  -2    1.00    1.10
  11   2  -2    2.20    1.00
  10  -2  -2    1.30    0.90
  10  -2  -2    0.30    0.90
  10  -2  -2    0.60    0.70
  10   2  -2    1.40    1.00
  10   2  -2    2.20    0.80
  10   2  -2    1.10    0.50
   9  -2  -2  100.09    6.30
   9  -2  -2   97.19    5.50
   9  -2  -2   92.29    5.50
   9   2  -2   97.19    5.40
   9   2  -2   92.89    6.10
   9   2  -2   93.89    5.30
   8  -2  -2    2.80    0.90
   8  -2  -2    3.50    0.90
   8  -2  -2    2.90    0.90
   8   2  -2    3.60    1.20
   8   2  -2    3.50    0.80
   8   2  -2    4.80    1.00
  -7  -2   2   25.50    2.10
   7  -2  -2   30.40    2.00
   7  -2  -2   25.10    2.10
   7  -2  -2   27.70    2.50
   7   2  -2   27.50    2.50
   7   2  -2   27.10    1.90
   7   2  -2   27.90    1.90
   6  -2  -2   33.60    2.40
   6  -2  -2   37.40    2.80
  -6  -2   2   35.20    2.50
   6  -2  -2   40.50    2.30
   6   2  -2   35.20    2.90
   6   2  -2   33.60    2.20
   6   2  -2   35.90    2.20
  -5  -2   2  104.39    5.80
   5  -2  -2  107.99    5.20
   5  -2  -2  108.19    5.50
  -5  -2   2  110.99    5.60
  -5  -2   2   95.09    5.30
  -5   2   2  100.69    5.80
   5   2  -2  105.09    5.30
   5   2  -2  104.39    5.90
   5   2  -2  105.99    5.30
  -5   2   2  110.39    5.40
  -4  -2   2  585.14   27.30
   4  -2  -2  598.84   27.10
   4  -2  -2  592.34   27.40
  -4  -2   2  581.94   26.90
  -4  -2   2  545.15   26.80
   4  -2  -2  601.44   26.70
   4   2  -2  561.94   27.40
   4   2  -2  568.74   27.00
   4   2  -2  592.34   26.90
  -3  -2   2    9.10    0.80
   3  -2  -2    9.70    1.20
  -3  -2   2   10.10    1.00
   3  -2  -2    7.90    0.90
  -3  -2   2    8.40    0.70
   3   2  -2    9.20    0.80
   3   2  -2    7.40    1.00
   3   2  -2    9.20    0.80
  -3   2   2    9.90    0.90
  -3   2   2    7.00    0.80
   2  -2  -2  116.49    5.70
  -2  -2   2  112.79    5.90
   2  -2  -2  122.29    5.80
  -2  -2   2  109.39    5.70
   2   2  -2  115.79    5.80
  -2   2   2  118.99    5.70
  -2   2   2  116.29    5.40
  -2   2   2  116.09    5.70
   2   2  -2  113.59    5.90
   1  -2  -2  118.19    5.90
   1  -2  -2  116.79    5.70
  -1  -2   2  119.59    6.00
  -1  -2   2  125.19    5.90
   1   2  -2  120.29    6.00
   1   2  -2  120.59    5.90
  -1   2   2  114.89    5.70
   0  -2  -2  125.89    6.60
   0  -2   2  135.49    6.80
   0  -2   2  138.69    6.60
   0   2   2  132.79    6.60
   0   2  -2  141.49    6.80
   1  -2   2   20.90    1.10
   1  -2   2   21.40    1.60
  -1  -2  -2   19.00    1.30
   1  -2   2   19.10    1.50
  -1  -2  -2   18.50    1.10
  -1   2  -2   19.00    1.10
   1   2   2   20.80    1.40
  -1   2  -2   18.20    1.40
   1   2   2   19.50    1.10
  -1   2  -2   21.40    1.60
  -2  -2  -2    0.40    0.30
   2  -2   2    0.10    0.50
   2  -2   2    1.00    0.50
  -2  -2  -2    0.40    0.20
   2  -2   2    0.30    0.20
   2   2   2    0.50    0.30
   2   2   2    0.50    0.30
  -2   2  -2    0.40    0.20
   2   2   2    0.30    0.40
  -2   2  -2    0.10    0.40
   3  -2   2  385.66   19.00
   3  -2   2  384.56   18.70
   3  -2   2  367.66   18.60
   3  -2   2  378.36   18.20
  -3  -2  -2  386.26   18.50
  -3  -2  -2  417.56   18.90
   3   2   2  399.16   18.60
   3   2   2  400.46   18.70
  -3   2  -2  416.76   18.30
  -3   2  -2  379.16   18.80
   3   2   2  405.86   18.50
   4  -2   2  276.17   13.10
  -4  -2  -2  261.97   12.80
  -4  -2  -2  262.27   13.00
   4  -2   2  252.47   13.30
   4  -2   2  255.67   12.50
  -4  -2  -2  257.87   12.80
   4  -2   2  267.47   13.00
   4   2   2  257.37   12.90
   4   2   2  269.27   12.70
   4   2   2  273.07   12.90
  -4   2  -2  269.27   12.60
   5  -2   2    3.70    1.10
   5  -2   2    4.00    0.70
  -5  -2  -2    3.60    0.90
   5  -2   2    6.30    1.20
  -5   2  -2    3.70    0.80
   5   2   2    5.50    1.20
   5   2   2    2.90    0.80
   5   2   2    5.90    1.10
   6  -2   2    8.20    1.50
   6  -2   2    5.30    0.90
   6  -2   2    5.00    1.10
   6   2   2    3.80    0.90
  -6   2  -2    4.20    0.90
   6   2   2    4.70    1.20
   6   2   2    5.40    1.30
   7  -2   2    1.80    1.10
   7  -2   2    1.60    0.60
   7  -2   2    0.50    0.70
   7   2   2    0.20    0.60
   7   2   2    1.70    0.70
   7   2   2    1.00    0.80
   8  -2   2  120.79    7.00
   8  -2   2  116.89    7.10
   8   2   2  124.59    7.10
   8   2   2  101.49    6.70
   8   2   2  122.89    6.50
   9  -2   2    4.50    1.40
   9  -2   2    4.80    1.40
   9   2   2    5.70    1.40
   9   2   2    3.80    1.10
   9   2   2    3.00    1.30
  10  -2   2    2.90    1.60
  10  -2   2    3.40    1.40
  10   2   2    2.50    1.30
  10   2   2    2.50    1.40
  10   2   2    2.40    0.90
  11  -2   2   16.00    3.00
  11  -2   2   12.20    2.10
  11   2   2   14.10    2.60
  12  -2   2   -0.70    1.10
  12  -2   2    2.30    1.40
  12   2   2    0.30    1.20
  12   2   2    0.00    1.10
  13  -2   2    8.60    2.00
  13  -2   2    6.10    2.10
  13   2   2    9.90    2.40
  13   2   2    6.70    1.70
  13   2   2    6.70    1.90
  14  -2   2   19.80    2.90
  14  -2   2   19.70    3.20
  14   2   2   17.10    3.20
  14   2   2   14.70    2.40
  14   2   2   24.70    2.90
  15  -2   2    9.50    2.40
  15  -2   2   11.40    2.90
  15   2   2    9.80    2.10
  15   2   2    3.60    1.70
  15   2   2   12.10    2.70
  16  -3  -2   44.20    4.70
  16  -3  -2   45.90    4.00
  16  -3  -2   35.40    3.20
  16   3  -2   39.10    3.70
  16   3  -2   30.90    3.60
  16   3  -2   44.70    4.80
  15  -3  -2   -0.60    1.20
  15  -3  -2   -1.30    1.10
  15  -3  -2    1.80    1.50
  15   3  -2    0.60    1.10
  15   3  -2    2.00    1.20
  15   3  -2    1.10    1.60
  14  -3  -2    5.90    1.20
  14  -3  -2    8.60    2.20
  14  -3  -2    9.30    2.00
  14   3  -2    7.50    1.60
  14   3  -2    7.00    1.50
  14   3  -2   10.10    2.40
  13  -3  -2   24.50    3.90
  13  -3  -2   21.80    2.00
  13  -3  -2   19.30    2.70
  13   3  -2   27.30    3.90
  13   3  -2   20.50    2.40
  13   3  -2   30.10    2.60
  12  -3  -2    2.30    1.20
  12   3  -2    4.90    1.20
  12   3  -2    7.20    1.40
  12   3  -2    3.20    2.00
  11  -3  -2   88.49    5.50
  11  -3  -2   81.29    6.10
  11   3  -2   88.09    6.30
  11   3  -2   87.59    5.20
  11   3  -2   87.29    5.20
  10  -3  -2    3.30    1.20
  10  -3  -2    1.40    0.80
  10  -3  -2    0.70    0.70
  10   3  -2    0.60    0.70
  10   3  -2    0.00    0.80
  10   3  -2    1.80    0.70
   9  -3  -2    0.30    0.70
   9  -3  -2    0.70    0.60
   9  -3  -2    0.50    0.60
   9   3  -2    0.80    0.70
   9   3  -2    0.80    0.80
   9   3  -2   -0.50    0.50
   8  -3  -2  183.48    9.80
   8  -3  -2  173.68    8.90
   8   3  -2  166.58    8.80
   8   3  -2  172.28    9.70
   8   3  -2  179.28    9.00
   7  -3  -2    8.10    1.60
   7  -3  -2    7.90    1.30
   7  -3  -2    9.20    1.20
  -7  -3   2    8.10    1.20
   7   3  -2    8.30    1.60
   7   3  -2    8.00    1.10
   7   3  -2    8.10    1.20
  -6  -3   2    3.70    0.80
   6  -3  -2    4.20    1.00
   6  -3  -2    4.50    0.70
   6  -3  -2    4.40    1.10
   6   3  -2    3.50    0.70
   6   3  -2    6.40    1.20
   6   3  -2    5.30    0.90
   5  -3  -2  229.48   11.50
   5  -3  -2  234.58   10.80
  -5  -3   2  214.48   10.80
  -5  -3   2  221.48   11.50
   5  -3  -2  246.98   11.20
  -5  -3   2  231.98   11.10
   5   3  -2  217.88   11.00
   5   3  -2  232.58   10.90
   5   3  -2  228.38   11.50
  -5   3   2  218.68   11.00
  -4  -3   2  119.89    6.50
  -4  -3   2  121.89    6.20
   4  -3  -2  125.79    5.80
   4  -3  -2  121.99    6.20
  -4  -3   2  121.29    6.00
   4   3  -2  120.29    6.50
  -4   3   2  126.29    6.40
   4   3  -2  120.39    5.90
   4   3  -2  114.69    6.10
   3  -3  -2  274.67   13.50
   3  -3  -2  281.07   13.00
   3  -3  -2  284.77   13.30
  -3  -3   2  268.27   13.30
  -3  -3   2  282.97   13.30
  -3  -3   2  281.57   13.00
   3   3  -2  280.87   13.60
   3   3  -2  288.97   13.10
  -3   3   2  281.37   13.30
   3   3  -2  266.07   13.30
  -3   3   2  273.27   13.40
  -3   3   2  294.07   13.00
   2  -3  -2  225.68   10.80
  -2  -3   2  229.08   10.70
  -2  -3   2  230.78   10.90
   2  -3  -2  227.38   10.50
   2  -3  -2  231.28   10.80
  -2  -3   2  222.38   11.00
  -2   3   2  229.78   10.60
   2   3  -2  216.38   10.90
  -2   3   2  216.88   10.80
   2   3  -2  230.38   11.00
  -2   3   2  230.28   10.80
  -2   3   2  222.38   10.80
   1  -3  -2   11.60    0.80
  -1  -3   2   12.50    1.10
  -1  -3   2   12.00    1.10
   1  -3  -2   13.00    1.00
  -1   3   2   12.40    1.00
  -1   3   2   12.00    1.00
  -1   3   2   12.50    0.90
   1   3  -2   13.90    1.20
   1   3  -2   12.50    1.10
   0  -3  -2   13.50    1.00
   0  -3   2   10.70    1.10
   0  -3   2   10.60    0.90
   0   3   2   12.00    1.00
   0   3  -2   10.30    0.90
   0   3  -2   11.70    1.20
  -1  -3  -2    1.60    0.30
   1  -3   2    2.40    0.70
   1  -3   2    2.70    0.60
  -1  -3  -2    1.90    0.50
   1  -3   2    1.80    0.30
   1   3   2    2.00    0.40
  -1   3  -2    1.10    0.50
  -1   3  -2    1.70    0.50
   1   3   2    1.70    0.50
  -1   3  -2    2.30    0.30
  -2  -3  -2   37.50    2.20
   2  -3   2   40.40    2.50
   2  -3   2   40.70    2.70
  -2  -3  -2   39.90    2.40
   2  -3   2   38.10    2.00
   2   3   2   40.60    2.30
  -2   3  -2   38.50    2.00
   2   3   2   40.00    2.20
   2   3   2   37.50    2.40
  -2   3  -2   38.50    2.60
  -3  -3  -2  158.18    7.80
   3  -3   2  152.68    8.30
   3  -3   2  155.48    8.00
   3  -3   2  157.98    8.00
  -3  -3  -2  163.18    7.90
   3  -3   2  153.68    7.40
   3   3   2  152.98    7.80
  -3   3  -2  167.68    7.50
  -3   3  -2  150.28    8.00
   3   3   2  163.88    7.90
   3   3   2  154.88    7.80
   4  -3   2  103.39    5.80
   4  -3   2  110.29    5.80
  -4  -3  -2  102.09    5.50
   4  -3   2   99.29    5.10
   4  -3   2   97.89    5.90
  -4  -3  -2  106.39    5.60
   4   3   2  106.69    5.60
  -4   3  -2  113.39    5.20
   4   3   2   97.99    5.40
   4   3   2  103.29    5.60
  -5  -3  -2    4.50    1.00
   5  -3   2    4.60    0.70
   5  -3   2    5.40    1.30
   5   3   2    5.70    1.00
   5   3   2    5.10    1.10
   5   3   2    5.50    1.10
  -5   3  -2    5.80    0.80
   6  -3   2   50.29    3.50
   6  -3   2   50.49    2.90
   6  -3   2   54.09    3.50
   6   3   2   47.50    3.20
  -6   3  -2   38.80    2.70
   6   3   2   50.19    3.10
   7  -3   2  157.68    8.30
   7  -3   2  145.29    8.30
   7   3   2  140.79    7.70
   7   3   2  159.98    8.10
  -7   3  -2  131.69    7.60
   7   3   2  147.59    8.20
   8  -3   2    4.40    1.30
   8  -3   2    4.90    1.40
   8   3   2    3.10    1.10
   8   3   2    3.70    1.10
   8   3   2    3.40    1.30
   9  -3   2    0.10    1.10
   9  -3   2   -1.20    0.50
   9   3   2    0.10    0.80
   9   3   2    0.70    0.90
   9   3   2   -0.80    0.60
  10  -3   2   35.60    3.50
  10  -3   2   32.20    3.40
  10   3   2   34.60    3.50
  10   3   2   37.10    3.20
  10   3   2   36.50    3.00
  11  -3   2   12.60    2.20
  11   3   2   10.40    2.70
  11   3   2   12.60    2.50
  11   3   2   11.40    2.10
  12  -3   2   43.00    4.40
  12  -3   2   46.50    3.90
  12   3   2   46.50    4.50
  12   3   2   47.90    3.70
  12   3   2   48.00    3.90
  13  -3   2    2.30    1.50
  13  -3   2    3.10    1.60
  13   3   2    5.20    1.60
  13   3   2    1.40    1.40
  13   3   2    3.00    1.60
  14  -3   2    3.50    1.70
  14  -3   2   -0.80    1.50
  14   3   2    3.20    1.60
  14   3   2   -0.80    1.30
  14   3   2    1.70    1.40
  15  -3   2   19.60    3.90
  15  -3   2   16.50    3.20
  15   3   2   14.70    2.70
  15   3   2   19.80    2.60
  15   3   2   24.20    3.90
  16  -4  -2    0.30    1.60
  16  -4  -2   -0.10    1.20
  16  -4  -2    0.20    1.30
  16   4  -2   -4.10    1.40
  16   4  -2    3.20    1.50
  16   4  -2    0.10    1.70
  15  -4  -2   15.40    2.80
  15  -4  -2   16.80    2.20
  15  -4  -2   18.40    3.50
  15   4  -2   15.60    2.10
  15   4  -2   21.30    2.70
  15   4  -2   15.70    2.80
  14  -4  -2    4.80    1.70
  14  -4  -2    4.20    1.70
  14  -4  -2    2.20    1.00
  14   4  -2    4.00    1.30
  14   4  -2    3.30    1.70
  14   4  -2    3.10    1.90
  13  -4  -2   -1.00    1.10
  13  -4  -2    0.20    1.10
  13   4  -2   -1.10    1.10
  13   4  -2    2.70    1.00
  13   4  -2    1.00    0.90
  12  -4  -2   76.09    5.90
  12  -4  -2   80.79    5.40
  12   4  -2   75.99    6.60
  12   4  -2   79.09    5.00
  12   4  -2   75.39    4.80
  11  -4  -2   39.70    3.80
  11  -4  -2   41.70    3.30
  11   4  -2   38.20    3.00
  11   4  -2   38.30    2.90
  11   4  -2   40.80    3.80
  10  -4  -2   64.79    4.90
  10  -4  -2   63.79    4.00
  10  -4  -2   62.49    4.20
  10   4  -2   59.39    3.80
  10   4  -2   57.99    4.00
  10   4  -2   60.39    4.60
   9  -4  -2   20.10    2.80
   9  -4  -2   21.30    2.00
   9  -4  -2   19.70    1.90
   9   4  -2   18.40    1.80
   9   4  -2   17.20    1.70
   9   4  -2   16.10    2.40
   8  -4  -2  192.48   10.10
   8  -4  -2  150.38    9.30
  -8  -4   2  198.08    9.60
   8  -4  -2  188.08    9.30
   8   4  -2  175.98   10.00
   8   4  -2  183.38    9.30
   7  -4  -2   47.10    3.40
  -7  -4   2   60.29    3.30
   7  -4  -2   60.09    3.30
   7  -4  -2   55.39    3.90
   7   4  -2   59.29    4.00
   7   4  -2   53.79    3.10
   7   4  -2   51.59    3.40
   6  -4  -2  101.39    5.20
   6  -4  -2  102.59    5.90
  -6  -4   2   88.79    5.10
   6  -4  -2  105.39    5.50
   6   4  -2   99.69    5.10
   6   4  -2  101.49    5.40
   6   4  -2  106.69    6.00
  -5  -4   2   49.00    3.20
  -5  -4   2   39.20    2.70
  -5  -4   2   43.80    2.50
   5  -4  -2   46.40    3.10
  -5  -4   2   47.40    2.80
   5  -4  -2   50.39    2.60
   5   4  -2   45.60    2.50
   5   4  -2   51.99    3.30
  -5   4   2   45.50    3.10
   5   4  -2   44.20    2.80
  -5   4   2   51.59    2.80
  -4  -4   2   48.20    2.80
  -4  -4   2   47.30    3.00
  -4  -4   2   48.20    2.70
   4  -4  -2   43.20    2.90
  -4  -4   2   40.80    2.40
   4  -4  -2   49.70    2.80
   4  -4  -2   51.19    2.50
   4   4  -2   43.60    2.80
   4   4  -2   44.20    2.80
  -4   4   2   45.90    2.50
  -4   4   2   46.10    2.70
   4   4  -2   45.50    2.40
   4   4  -2   50.69    3.10
  -4   4   2   48.00    2.90
   3  -4  -2  163.08    7.70
  -3  -4   2  152.98    7.90
  -3  -4   2  159.78    7.60
  -3  -4   2  153.98    8.00
  -3  -4   2  168.38    8.30
   3  -4  -2  168.88    8.00
   3  -4  -2  157.88    8.10
  -3   4   2  166.78    7.90
  -3   4   2  159.48    8.10
   3   4  -2  164.58    8.10
   3   4  -2  155.38    8.20
  -3   4   2  174.78    7.80
   2  -4  -2    9.60    1.10
   2  -4  -2   12.10    0.90
  -2  -4   2   11.70    1.20
  -2  -4   2   14.20    1.00
  -2  -4   2   12.40    1.20
   2  -4  -2   10.50    1.00
   2   4  -2   11.40    1.10
  -2   4   2   11.70    0.90
   2   4  -2   11.50    1.20
  -2   4   2   10.00    1.00
  -2   4   2   12.70    1.10
  -1  -4   2    0.80    0.50
  -1  -4   2    0.10    0.30
   1  -4  -2    1.00    0.30
  -1  -4   2    0.40    0.40
  -1  -4   2    1.20    0.40
   1  -4  -2    0.10    0.40
   1  -4  -2    0.40    0.30
   1   4  -2    1.50    0.60
  -1   4   2    0.30    0.40
   1   4  -2    0.80    0.40
  -1   4   2    0.60    0.40
  -1   4   2    1.50    0.50
   0  -4   2   31.00    2.20
   0  -4   2   32.00    1.90
   0  -4  -2   32.00    2.00
   0   4  -2   31.70    1.90
   0   4  -2   31.80    2.20
   0   4   2   31.80    2.00
   0   4   2   32.80    2.00
  -1  -4  -2    7.10    0.80
  -1  -4  -2    7.60    0.70
   1  -4   2    8.40    1.10
   1  -4   2    7.00    0.90
  -1   4  -2    7.70    1.20
   1   4   2    8.10    0.90
   1   4   2    7.70    0.70
  -1   4  -2    8.50    1.10
  -2  -4  -2  533.65   26.00
   2  -4   2  574.34   26.30
   2  -4   2  553.94   25.60
  -2   4  -2  594.84   25.70
  -2   4  -2  565.84   26.60
  -2   4  -2  571.24   26.60
   2   4   2  525.25   26.10
   2   4   2  559.64   26.00
  -3  -4  -2    1.60    0.60
   3  -4   2    1.40    0.30
  -3  -4  -2    1.60    0.50
   3  -4   2    0.70    0.60
   3  -4   2    1.70    0.60
  -3   4  -2    1.00    0.30
   3   4   2    0.70    0.40
   3   4   2    1.30    0.50
   3   4   2    1.10    0.50
  -3   4  -2    1.00    0.50
  -4  -4  -2    1.30    0.50
   4  -4   2    1.40    0.70
   4  -4   2    1.20    0.30
   4  -4   2    1.20    0.60
   4  -4   2    1.70    0.60
   4   4   2    2.20    0.70
  -4   4  -2    1.20    0.40
   4   4   2    1.10    0.60
   4   4   2    0.90    0.40
   5  -4   2  337.17   16.20
  -5  -4  -2  319.37   15.90
   5  -4   2  319.97   16.10
   5   4   2  320.97   15.90
   5   4   2  314.77   15.70
   5   4   2  344.77   16.20
  -5   4  -2  324.67   15.40
   6  -4   2   23.30    2.20
   6  -4   2   18.20    1.90
   6   4   2   18.20    1.70
   6   4   2   21.20    1.90
   7  -4   2  145.09    8.00
   7  -4   2  131.59    7.60
  -7   4  -2  124.09    6.90
   7   4   2  139.99    7.50
   7   4   2  137.59    7.30
   7   4   2  139.39    7.70
   8  -4   2   -0.20    0.60
   8  -4   2    0.80    1.00
   8   4   2   -0.40    0.50
   8   4   2    1.60    0.90
   8   4   2    0.60    0.70
   9  -4   2    9.30    1.90
   9  -4   2   13.60    2.30
   9   4   2   13.30    1.80
   9   4   2   10.30    1.90
   9   4   2   11.10    2.10
  10  -4   2   51.59    4.50
  10  -4   2   59.69    4.20
  10   4   2   52.79    3.90
  10   4   2   50.39    4.30
  10   4   2   52.39    3.90
  11  -4   2   56.79    4.10
  11  -4   2   49.10    4.50
  11   4   2   50.39    4.10
  11   4   2   47.20    3.80
  11   4   2   50.99    3.80
  11   4   2   51.79    4.50
  12  -4   2    6.20    2.10
  12  -4   2    8.60    2.10
  12   4   2    7.00    1.70
  12   4   2    8.60    1.70
  12   4   2   11.20    2.20
  13  -4   2    6.30    2.00
  13  -4   2    5.80    1.90
  13   4   2    6.10    2.30
  13   4   2    3.80    1.70
  13   4   2   10.00    2.40
  14  -4   2    8.50    1.90
  14  -4   2    9.70    2.40
  14   4   2   11.80    2.00
  14   4   2   12.90    2.40
  14   4   2    7.20    2.20
  15   4   2   -0.40    1.30
  16  -5  -2   32.30    3.60
  16  -5  -2   35.50    5.20
  16   5  -2   34.20    3.30
  16   5  -2   34.10    3.50
  16   5  -2   21.30    3.90
  15  -5  -2    9.00    2.50
  15  -5  -2    9.40    2.20
  15  -5  -2    6.20    1.50
  15   5  -2    9.10    2.40
  15   5  -2   10.20    2.00
  15   5  -2    8.10    1.80
  14  -5  -2   -1.40    1.00
  14  -5  -2   -1.50    1.00
  14   5  -2    0.70    1.10
  14   5  -2    0.40    1.20
  14   5  -2    1.40    1.10
  13  -5  -2   50.09    4.80
  13  -5  -2   50.69    4.10
  13   5  -2   49.40    3.80
  13   5  -2   46.50    3.50
  13   5  -2   49.90    4.70
  12  -5  -2    7.60    1.80
  12  -5  -2    6.80    1.70
  12   5  -2   10.20    1.60
  12   5  -2    8.50    1.50
  12   5  -2    6.10    2.00
  11  -5  -2   78.49    5.90
  11  -5  -2   87.89    5.40
  11   5  -2   76.49    5.00
  11   5  -2   80.89    5.90
  11   5  -2   79.29    4.80
  10  -5  -2   23.70    3.20
  10  -5  -2   16.70    1.80
  10  -5  -2   17.80    2.00
  10   5  -2   17.50    2.70
  10   5  -2   18.50    1.90
  10   5  -2   18.00    1.70
   9  -5  -2    0.40    0.70
   9  -5  -2    2.20    0.90
   9  -5  -2    0.20    0.70
   9   5  -2    1.80    1.00
   9   5  -2    1.20    0.70
   9   5  -2    0.80    0.70
   8  -5  -2   22.50    2.40
  -8  -5   2   18.40    1.70
   8  -5  -2   19.90    1.80
   8  -5  -2   15.90    1.80
   8   5  -2   22.10    2.30
   8   5  -2   20.70    1.90
   8   5  -2   19.20    1.60
   7  -5  -2  143.09    7.70
   7  -5  -2  145.59    7.50
   7  -5  -2  150.38    8.30
   7   5  -2  146.69    7.70
   7   5  -2  138.89    8.20
   7   5  -2  148.39    7.20
   7   5  -2  143.79    7.80
  -6  -5   2  327.97   15.80
   6  -5  -2  349.07   16.30
   6  -5  -2  340.77   16.70
   6  -5  -2  340.17   16.00
   6   5  -2  344.47   16.80
   6   5  -2  305.87   16.20
   6   5  -2  333.67   16.20
   6   5  -2  334.57   15.70
  -5  -5   2   78.09    4.40
  -5  -5   2   86.39    5.20
   5  -5  -2   84.39    4.30
   5  -5  -2   81.39    4.80
  -5  -5   2   72.99    4.10
   5  -5  -2   83.19    4.50
   5   5  -2   81.39    4.60
   5   5  -2   82.29    4.90
   5   5  -2   77.59    4.10
   5   5  -2   80.89    4.60
  -5   5   2   86.29    4.30
  -4  -5   2   27.50    1.50
  -4  -5   2   27.80    2.20
   4  -5  -2   29.10    1.80
   4  -5  -2   30.90    2.20
   4  -5  -2   30.70    2.00
  -4  -5   2   28.20    1.90
  -4  -5   2   27.80    2.00
  -4   5   2   29.80    1.80
   4   5  -2   28.40    1.60
   4   5  -2   26.50    2.00
   4   5  -2   31.10    2.00
   4   5  -2   31.10    2.30
   3  -5  -2   42.70    2.50
  -3  -5   2   41.30    2.60
  -3  -5   2   38.10    2.30
   3  -5  -2   40.10    2.60
   3  -5  -2   41.00    2.30
   3   5  -2   36.30    2.40
   3   5  -2   42.10    2.70
  -3   5   2   42.00    2.50
   3   5  -2   41.00    2.70
  -3   5   2   42.10    2.40
  -2  -5   2  339.67   16.70
  -2  -5   2  348.87   16.80
  -2  -5   2  347.87   16.40
   2  -5  -2  343.07   16.60
   2  -5  -2  355.36   16.40
   2  -5  -2  345.47   16.60
  -2   5   2  346.97   16.60
   2   5  -2  354.76   16.80
   2   5  -2  344.07   16.80
  -2   5   2  370.16   16.50
   2   5  -2  352.56   16.50
  -2   5   2  349.57   16.50
  -1  -5   2   36.50    2.40
  -1  -5   2   35.60    1.90
   1  -5  -2   33.50    2.10
   1  -5  -2   34.10    2.20
   1  -5  -2   34.70    2.20
  -1  -5   2   34.50    2.40
  -1  -5   2   35.60    2.00
   1   5  -2   34.20    2.30
  -1   5   2   33.50    2.10
  -1   5   2   38.90    2.30
   1   5  -2   36.10    2.50
  -1   5   2   39.10    2.20
   0  -5   2  125.49    5.70
   0  -5  -2  125.59    6.20
   0  -5   2  119.99    6.40
   0  -5   2  116.09    6.00
   0   5   2  120.79    6.10
   0   5  -2  117.39    6.00
   0   5  -2  115.89    6.50
   0   5   2  127.89    6.20
   1  -5   2  251.07   12.80
  -1  -5  -2  264.77   12.70
  -1  -5  -2  258.97   12.30
   1  -5   2  264.57   12.50
   1   5   2  262.17   12.30
   1   5   2  238.18   12.40
  -1   5  -2  269.47   12.50
   1   5   2  267.27   12.60
  -1   5  -2  257.77   12.90
  -2  -5  -2    9.40    1.20
   2  -5   2   12.20    1.20
   2  -5   2   10.90    1.60
  -2  -5  -2    8.70    0.90
   2   5   2    9.10    0.90
   2   5   2    8.50    1.00
  -2   5  -2   10.60    1.50
  -2   5  -2    8.90    1.00
  -3  -5  -2  167.98    8.90
   3  -5   2  179.28    9.50
  -3  -5  -2  192.68    9.20
   3   5   2  182.08    9.00
  -3   5  -2  189.58    8.50
  -3   5  -2  179.18    9.50
   3   5   2  181.98    9.00
   3   5   2  185.58    9.10
  -3   5  -2  177.18    9.30
   4  -5   2   49.20    3.20
   4  -5   2   43.40    3.10
  -4  -5  -2   44.00    3.00
   4  -5   2   42.70    3.50
   4   5   2   46.70    2.80
   4   5   2   45.00    2.90
   4   5   2   43.00    2.90
  -4   5  -2   47.30    2.40
   5  -5   2   65.39    4.00
  -5  -5  -2   57.59    3.70
   5  -5   2   60.09    4.00
   5   5   2   61.29    3.90
  -5   5  -2   61.99    3.30
   5   5   2   55.59    3.60
   5   5   2   69.99    3.80
   6  -5   2  217.48   11.00
   6  -5   2  202.58   11.00
   6   5   2  215.88   10.60
   6   5   2  200.18   10.60
   7  -5   2    7.50    1.70
   7  -5   2    7.90    1.60
   7   5   2    5.60    1.20
  -7   5  -2    6.20    1.00
   7   5   2    6.30    1.30
   7   5   2    5.90    1.30
   8  -5   2    4.20    1.40
   8  -5   2    5.60    1.40
   8   5   2    2.00    0.90
   8   5   2    3.40    1.00
   8   5   2    1.50    1.10
   9  -5   2   12.90    2.40
   9  -5   2   10.90    1.90
   9   5   2   14.10    2.00
   9   5   2   18.50    2.70
   9   5   2   12.90    1.90
  10  -5   2   58.39    5.00
  10  -5   2   73.39    4.90
  10   5   2   61.19    4.40
  10   5   2   73.69    4.90
  10   5   2   62.49    4.50
  10   5   2   71.69    5.20
  11  -5   2   12.30    2.40
  11  -5   2    7.90    1.70
  11   5   2   12.90    2.10
  11   5   2   10.90    2.40
  11   5   2   10.40    1.90
  11   5   2   11.40    2.90
  12  -5   2   25.00    3.60
  12  -5   2   29.10    3.10
  12   5   2   31.00    2.90
  12   5   2   24.50    2.90
  12   5   2   28.20    2.70
  12   5   2   30.30    4.00
  13  -5   2   -0.80    1.20
  13  -5   2    0.50    1.20
  13   5   2    1.30    1.60
  13   5   2   -1.40    1.30
  13   5   2    0.30    1.40
  14  -5   2   -1.00    1.20
  14  -5   2    2.60    1.50
  14   5   2   -0.70    1.30
  14   5   2    0.20    1.50
  14   5   2   -0.20    1.40
  16  -6  -2    7.40    2.10
  16   6  -2    8.40    2.60
  16   6  -2   11.30    2.50
  16   6  -2    9.90    2.00
  15  -6  -2    5.80    1.40
  15  -6  -2    7.00    2.30
  15  -6  -2    7.70    2.10
  15   6  -2    2.80    1.80
  15   6  -2   10.00    1.70
  14  -6  -2    4.80    1.70
  14  -6  -2    3.20    1.30
  14   6  -2    3.90    1.80
  14   6  -2    3.30    1.20
  14   6  -2    2.40    1.40
  13  -6  -2    1.20    1.30
  13  -6  -2   -0.10    1.10
  13   6  -2    2.80    1.10
  13   6  -2   -1.00    0.90
  13   6  -2    1.00    1.20
  12  -6  -2   74.79    5.00
  12  -6  -2   79.69    6.00
  12   6  -2   67.29    4.40
  12   6  -2   66.89    5.50
  12   6  -2   71.29    4.90
  11  -6  -2   11.40    2.60
  11   6  -2    9.00    2.20
  11   6  -2   13.10    1.90
  11   6  -2   12.80    1.70
  10  -6  -2   71.09    4.70
  10  -6  -2   79.39    5.00
  10  -6  -2   79.79    5.60
  10   6  -2   71.19    5.50
  10   6  -2   76.99    4.90
  10   6  -2   75.49    4.40
   9  -6  -2   16.90    2.60
   9  -6  -2   11.10    1.70
   9  -6  -2   11.30    1.60
   9   6  -2   12.60    1.30
   9   6  -2   10.00    1.60
   9   6  -2   15.30    2.50
   8  -6  -2   71.09    4.70
  -8  -6   2   82.39    4.40
   8  -6  -2   83.49    5.30
   8   6  -2   76.89    5.30
   8   6  -2   79.59    4.90
   8   6  -2   75.09    4.20
   8   6  -2   77.89    4.70
   7  -6  -2  118.09    7.10
   7  -6  -2  129.59    6.50
  -7  -6   2  118.39    6.20
   7  -6  -2  119.19    6.70
   7   6  -2  130.59    6.80
   7   6  -2  116.89    7.10
   7   6  -2  122.49    6.10
   6  -6  -2  286.27   13.70
   6  -6  -2  280.67   13.50
  -6  -6   2  277.37   13.20
   6  -6  -2  281.57   14.10
   6   6  -2  277.77   14.20
   6   6  -2  266.17   13.70
   6   6  -2  276.37   13.10
   6   6  -2  274.87   13.80
  -5  -6   2  420.16   20.20
   5  -6  -2  454.45   21.10
  -5  -6   2  419.16   19.70
   5  -6  -2  433.36   20.00
   5  -6  -2  463.95   20.30
   5   6  -2  366.16   20.10
   5   6  -2  422.36   19.60
  -5   6   2  440.76   20.00
   5   6  -2  379.16   21.30
   5   6  -2  433.36   20.40
   4  -6  -2  235.48   11.50
  -4  -6   2  212.98   11.60
  -4  -6   2  225.68   11.30
   4  -6  -2  239.28   11.10
  -4  -6   2  223.68   11.20
   4  -6  -2  236.68   11.30
  -4   6   2  247.08   11.20
   4   6  -2  234.58   11.70
   4   6  -2  226.98   11.30
   4   6  -2  215.78   11.40
   3  -6  -2 1878.11   83.99
   3  -6  -2 1823.52   83.79
   3  -6  -2 1756.72   83.99
  -3  -6   2 1838.02   83.99
   3   6  -2 1807.32   84.29
   3   6  -2 1738.33   84.19
   3   6  -2 1783.32   83.89
  -3   6   2 1903.41   83.79
  -3   6   2 1899.71   83.89
  -3   6   2 1816.72   83.89
  -2  -6   2  948.91   45.60
  -2  -6   2  967.60   45.00
   2  -6  -2  973.40   45.40
   2  -6  -2 1001.30   45.30
  -2  -6   2 1012.80   45.20
   2  -6  -2 1010.00   45.40
   2   6  -2  922.71   45.30
  -2   6   2 1023.90   45.40
  -2   6   2  987.30   45.40
  -2   6   2  980.70   45.30
   2   6  -2  962.00   45.80
   1  -6  -2   40.30    2.40
  -1  -6   2   41.00    2.10
   1  -6  -2   38.10    2.40
  -1  -6   2   37.70    2.10
  -1  -6   2   39.90    2.70
  -1  -6   2   41.20    2.60
   1  -6  -2   40.50    2.40
   1   6  -2   39.10    2.20
   1   6  -2   38.00    2.20
  -1   6   2   35.90    2.40
   1   6  -2   43.80    2.80
  -1   6   2   39.60    2.40
  -1   6   2   38.30    2.30
   0  -6   2   88.09    4.00
   0  -6   2   85.89    4.30
   0  -6  -2   83.69    4.50
   0  -6   2   78.79    5.00
   0  -6  -2   82.99    4.40
   0   6  -2   80.79    4.30
   0   6   2   82.99    4.30
   0   6  -2   84.19    4.90
   0   6   2   86.89    4.50
   0   6   2   77.59    4.40
  -1  -6  -2  215.08   10.60
   1  -6   2  211.38   10.50
  -1  -6  -2  213.48   10.40
   1  -6   2  219.88   11.00
  -1   6  -2  216.08   11.00
   1   6   2  218.08   10.60
  -1   6  -2  217.58   10.50
   1   6   2  212.88   10.50
   2  -6   2 1119.79   50.39
   2  -6   2 1054.49   50.69
  -2  -6  -2 1111.99   50.39
  -2  -6  -2 1058.99   50.09
  -2   6  -2 1066.09   50.39
  -2   6  -2 1077.09   50.79
   2   6   2 1096.89   50.39
   2   6   2 1110.19   50.29
   2   6   2 1073.69   50.09
  -3  -6  -2  135.69    7.00
   3  -6   2  155.48    7.40
   3  -6   2  141.29    7.60
  -3   6  -2  143.99    7.70
   3   6   2  140.79    7.00
   3   6   2  132.69    7.30
   3   6   2  137.59    7.10
   3   6   2  118.89    7.00
   4  -6   2  275.77   13.60
   4   6   2  261.47   13.50
   4   6   2  267.77   13.30
  -4   6  -2  262.87   14.40
  -4   6  -2  285.97   12.70
   4   6   2  275.47   13.50
   4   6   2  277.57   13.30
   5  -6   2  180.78    9.50
  -5  -6  -2  171.28    9.10
   5  -6   2  183.08    9.40
   5   6   2  180.28    9.30
  -5   6  -2  172.88    8.40
   5   6   2  187.68    9.00
   5   6   2  173.88    9.20
   5   6   2  168.08    9.00
   6  -6   2  131.39    6.90
   6  -6   2  119.09    6.90
  -6   6  -2  100.49    5.80
   6   6   2  114.99    6.40
   6   6   2  126.39    6.40
   6   6   2  118.49    6.70
   6   6   2  115.79    6.70
   7  -6   2  137.99    8.10
   7  -6   2  154.58    8.00
   7   6   2  145.59    7.60
   7   6   2  132.69    7.80
   7   6   2  143.79    7.50
   7   6   2  137.39    7.80
  -7   6  -2  123.49    7.70
   8  -6   2    5.80    1.60
   8  -6   2    4.10    1.40
   8   6   2    5.40    1.30
   8   6   2    4.00    1.10
   8   6   2    4.30    1.30
  -8   6  -2    2.50    0.80
   8   6   2    3.40    1.20
   9  -6   2   42.80    3.90
   9  -6   2   49.40    4.10
   9   6   2   44.40    3.40
   9   6   2   43.20    3.70
   9   6   2   43.80    3.40
   9   6   2   45.20    3.60
  10  -6   2   46.90    4.10
  10  -6   2   53.29    4.00
  10   6   2   44.20    4.00
  10   6   2   39.50    3.40
  10   6   2   52.59    4.00
  11  -6   2   46.40    3.80
  11  -6   2   50.59    4.50
  11   6   2   46.90    3.80
  11   6   2   41.30    4.00
  11   6   2   43.60    3.80
  11   6   2   44.00    3.50
  12  -6   2    4.80    1.80
  12  -6   2    5.40    1.60
  12   6   2    4.60    1.50
  12   6   2    6.20    1.70
  12   6   2    2.80    1.50
  12   6   2    1.30    1.40
  13  -6   2    6.70    1.90
  13  -6   2    2.30    1.60
  13   6   2    5.50    1.50
  13   6   2   13.00    2.60
  13   6   2    7.90    1.90
  14  -6   2   14.60    2.90
  14  -6   2   11.00    2.40
  14   6   2    9.80    2.50
  14   6   2   14.10    2.20
  14   6   2   15.60    2.60
  16  -7  -2   29.30    5.70
  16   7  -2   39.70    4.30
  16   7  -2   35.50    3.40
  16   7  -2   32.30    3.80
  15  -7  -2   10.80    2.40
  15  -7  -2    9.50    2.70
  15   7  -2   12.50    2.10
  15   7  -2    3.90    1.70
  15   7  -2    7.30    2.30
  14  -7  -2    4.40    1.60
  14  -7  -2    3.00    1.40
  14   7  -2    3.90    1.70
  14   7  -2    1.50    1.30
  14   7  -2    2.20    1.20
  13  -7  -2   44.00    3.70
  13  -7  -2   41.30    4.20
  13   7  -2   32.60    3.30
  13   7  -2   36.80    4.00
  13   7  -2   37.10    2.90
  12  -7  -2    0.40    1.10
  12  -7  -2   -0.50    1.00
  12   7  -2    1.60    0.90
  12   7  -2    2.00    1.10
  12   7  -2   -0.90    1.00
  11  -7  -2    1.00    1.10
  11   7  -2    0.60    0.80
  11   7  -2    0.40    1.00
  11   7  -2    2.60    0.90
  10  -7  -2   48.90    3.60
  10  -7  -2   42.50    3.50
  10  -7  -2   48.20    4.10
  10   7  -2   44.20    2.90
  10   7  -2   43.10    3.40
  10   7  -2   44.60    4.00
  -9  -7   2    0.30    0.60
   9  -7  -2   -0.60    0.60
   9  -7  -2    0.20    0.80
   9  -7  -2    0.40    0.70
   9   7  -2    0.70    0.50
   9   7  -2    0.40    0.90
   9   7  -2   -1.00    0.60
   8  -7  -2    0.20    0.60
   8  -7  -2    1.40    0.60
  -8  -7   2    1.20    0.50
   8  -7  -2    0.30    0.70
   8   7  -2    0.20    0.70
   8   7  -2    0.50    0.60
   8   7  -2    0.40    0.70
   8   7  -2    0.60    0.40
   7  -7  -2  357.16   16.90
   7  -7  -2  328.17   16.00
  -7  -7   2  322.37   15.60
   7  -7  -2  327.57   16.20
   7   7  -2  328.97   16.30
   7   7  -2  327.87   15.50
   7   7  -2  318.07   16.70
   7   7  -2  328.27   16.40
   6  -7  -2   22.90    2.00
   6  -7  -2   24.90    1.90
   6  -7  -2   21.30    2.10
   6   7  -2   27.00    2.10
   6   7  -2   22.30    1.40
   6   7  -2   21.70    2.20
   6   7  -2   26.30    2.40
  -6   7   2   24.60    1.80
   5  -7  -2   11.50    1.20
  -5  -7   2   10.90    1.30
   5  -7  -2   12.30    1.40
   5  -7  -2   13.40    1.50
   5   7  -2   12.70    1.80
   5   7  -2   11.90    1.50
   5   7  -2    9.40    1.40
  -5   7   2   12.80    1.20
  -4  -7   2    0.00    0.40
   4  -7  -2    0.20    0.40
  -4  -7   2    0.30    0.40
  -4  -7   2    0.00    0.50
   4  -7  -2    0.30    0.40
   4  -7  -2    0.10    0.50
   4   7  -2    1.00    0.50
  -4   7   2    0.30    0.40
   4   7  -2    0.20    0.50
  -4   7   2    0.20    0.40
  -3  -7   2  118.79    6.40
   3  -7  -2  117.99    6.00
  -3  -7   2  114.89    5.90
   3  -7  -2  115.89    6.10
  -3  -7   2  109.79    6.20
   3   7  -2  119.29    6.10
  -3   7   2  115.49    6.10
   3   7  -2  114.79    6.40
  -3   7   2  122.39    6.10
  -3   7   2  117.19    5.90
   2  -7  -2 1050.29   48.40
  -2  -7   2 1009.10   47.90
  -2  -7   2 1028.10   48.80
   2  -7  -2 1019.60   48.40
  -2  -7   2 1095.69   48.20
  -2  -7   2 1042.80   48.70
   2  -7  -2 1051.89   48.30
   2   7  -2 1020.80   48.80
   2   7  -2 1064.09   48.30
  -2   7   2 1044.30   48.40
  -2   7   2 1087.89   48.50
   2   7  -2 1015.40   48.70
  -2   7   2 1059.49   48.40
  -1  -7   2  414.16   18.40
   1  -7  -2  388.36   18.70
  -1  -7   2  401.96   19.10
  -1  -7   2  378.26   19.10
   1  -7  -2  406.76   18.80
   1  -7  -2  400.86   18.80
  -1  -7   2  397.76   18.40
  -1   7   2  386.66   18.70
  -1   7   2  396.86   18.60
  -1   7   2  409.16   18.90
   1   7  -2  367.26   18.50
   1   7  -2  407.16   18.50
   1   7  -2  390.76   19.30
   0  -7  -2  479.35   21.60
   0  -7   2  469.85   21.20
   0  -7   2  435.76   21.70
   0  -7   2  468.05   20.90
   0  -7  -2  437.96   21.40
   0   7  -2  470.35   21.90
   0   7   2  413.96   21.30
   0   7   2  439.66   21.10
   0   7   2  465.55   21.50
   0   7  -2  443.16   20.90
   0   7  -2  447.96   21.20
  -1  -7  -2 1387.26   63.39
   1  -7   2 1395.76   62.69
  -1  -7  -2 1348.57   63.19
   1  -7   2 1421.46   63.29
   1   7   2 1372.06   63.29
   1   7   2 1393.76   63.49
  -1   7  -2 1392.46   63.89
  -1   7  -2 1252.87   63.69
   2  -7   2   81.19    4.20
  -2  -7  -2   68.29    4.10
   2  -7   2   66.29    4.40
  -2  -7  -2   68.39    3.90
  -2   7  -2   69.29    4.50
   2   7   2   72.09    4.20
  -2   7  -2   73.29    4.10
   2   7   2   70.59    3.90
  -3  -7  -2   90.89    5.10
   3  -7   2  100.89    5.40
   3  -7   2  101.39    6.10
  -3   7  -2   98.39    5.70
   3   7   2   78.89    5.10
   3   7   2   99.69    5.40
   3   7   2   96.69    5.20
   3   7   2   96.99    5.00
   4  -7   2   42.50    3.00
  -4  -7  -2   40.50    2.70
   4   7   2   41.50    2.60
  -4   7  -2   33.20    3.00
   4   7   2   40.50    2.70
   4   7   2   40.30    2.80
   4   7   2   44.10    3.00
   5  -7   2   92.89    5.60
   5  -7   2   98.79    5.50
  -5  -7  -2   84.69    5.20
   5   7   2   87.59    5.10
   5   7   2   90.69    5.00
   5   7   2   85.59    5.30
  -5   7  -2   90.59    4.40
   5   7   2   93.49    5.30
   6  -7   2  391.86   18.80
   6  -7   2  383.16   19.00
   6   7   2  383.36   18.70
   6   7   2  407.26   18.30
   6   7   2  379.46   18.70
  -6   7  -2  352.06   17.70
   6   7   2  353.46   18.40
   7  -7   2    1.30    0.90
   7  -7   2    1.20    0.70
   7   7   2    1.50    0.80
   7   7   2    0.00    0.70
  -7   7  -2    1.00    0.60
   7   7   2    0.70    0.60
   7   7   2    1.30    0.80
   8  -7   2    1.30    0.70
   8  -7   2   -0.10    0.70
   8   7   2    0.50    0.80
  -8   7  -2   -0.30    0.60
   8   7   2    0.80    0.80
   8   7   2   -0.70    0.60
   8   7   2    0.30    0.70
   9  -7   2   61.09    4.80
   9  -7   2   68.09    4.70
   9   7   2   54.89    4.50
   9   7   2   63.99    4.50
   9   7   2   58.59    4.10
   9   7   2   59.99    4.20
  10  -7   2   14.00    2.20
  10   7   2   12.30    1.80
  10   7   2    9.60    2.00
  10   7   2   12.80    2.00
  10   7   2   12.80    2.40
  11  -7   2    4.80    1.40
  11  -7   2    8.10    2.10
  11   7   2    3.90    1.40
  11   7   2    5.50    1.40
  11   7   2    5.20    1.40
  11   7   2    9.90    2.30
  12  -7   2   20.10    3.40
  12  -7   2   23.80    2.80
  12   7   2   18.70    2.80
  12   7   2   19.00    2.90
  12   7   2   18.80    2.70
  12   7   2   22.00    3.40
  13  -7   2    1.20    1.30
  13  -7   2    2.00    1.40
  13   7   2    0.20    1.20
  13   7   2    1.10    1.20
  13   7   2   -0.60    1.10
  14  -7   2    1.30    1.30
  14  -7   2    0.00    1.60
  14   7   2    0.00    1.30
  14   7   2   -0.30    1.50
  14   7   2    1.20    1.40
  16  -8  -2   12.10    3.10
  16  -8  -2   21.00    3.20
  16   8  -2   13.20    2.40
  16   8  -2   17.00    3.40
  16   8  -2   19.50    2.40
  15  -8  -2    0.00    1.40
  15  -8  -2   -3.30    1.30
  15   8  -2    1.10    1.50
  15   8  -2    1.00    1.40
  15   8  -2   -0.20    1.30
  14  -8  -2   26.50    3.00
  14  -8  -2   22.10    3.90
  14   8  -2   24.20    2.40
  14   8  -2   20.70    3.70
  14   8  -2   13.30    3.10
  13  -8  -2   12.50    2.20
  13  -8  -2    9.90    2.30
  13   8  -2   12.10    1.80
  13   8  -2   12.50    2.50
  13   8  -2   10.10    1.90
  12  -8  -2   15.60    2.50
  12  -8  -2   23.70    3.70
  12   8  -2   24.40    2.60
  12   8  -2   19.20    2.00
  12   8  -2   19.90    3.30
  11  -8  -2    9.40    2.20
  11  -8  -2    7.60    1.70
  11   8  -2    8.80    1.80
  11   8  -2   11.40    2.40
  11   8  -2   10.80    1.50
  10  -8  -2   24.90    2.50
  10  -8  -2   25.20    2.90
  10   8  -2   23.80    2.50
  10   8  -2   20.90    1.80
  10   8  -2   23.70    3.30
   9  -8  -2    9.10    1.80
   9  -8  -2    7.60    1.30
   9  -8  -2    6.00    1.40
  -9  -8   2    6.10    1.00
   9   8  -2    9.30    1.70
   9   8  -2    6.50    1.40
   9   8  -2    7.70    1.90
   9   8  -2    7.80    1.00
   8  -8  -2   11.00    2.00
   8  -8  -2   13.80    1.80
  -8  -8   2   10.20    1.20
   8  -8  -2   11.10    1.80
   8   8  -2   12.10    1.70
   8   8  -2   14.70    2.10
   8   8  -2   14.10    2.30
   8   8  -2   12.10    1.10
  -7  -8   2    1.00    0.40
   7  -8  -2    1.40    0.70
   7  -8  -2    2.50    0.90
   7  -8  -2    2.00    0.90
   7   8  -2    1.40    0.40
   7   8  -2    1.10    0.90
   7   8  -2    1.00    0.70
   7   8  -2    0.20    0.40
   6  -8  -2  392.46   19.90
   6  -8  -2  403.56   19.30
   6  -8  -2  410.36   19.50
   6   8  -2  415.66   19.60
  -6   8   2  400.56   19.30
   6   8  -2  394.46   19.70
   6   8  -2  397.96   20.00
   5  -8  -2    8.70    1.20
   5  -8  -2    7.10    1.20
   5  -8  -2    6.60    1.30
   5   8  -2    6.30    1.20
  -5   8   2    9.20    1.20
   5   8  -2    6.30    1.40
   5   8  -2    4.40    1.10
  -5   8   2    8.20    1.20
  -4  -8   2   26.90    2.20
   4  -8  -2   27.50    2.10
   4  -8  -2   26.70    2.40
   4  -8  -2   30.60    2.00
   4   8  -2   27.30    2.10
   4   8  -2   27.60    2.30
  -4   8   2   30.00    2.00
  -4   8   2   27.40    2.10
  -3  -8   2  423.66   22.30
   3  -8  -2  474.55   22.10
   3  -8  -2  481.05   22.10
  -3  -8   2  453.25   21.90
  -3  -8   2  438.06   22.40
   3   8  -2  471.75   22.50
  -3   8   2  496.75   22.30
  -3   8   2  487.45   21.90
   3   8  -2  436.86   22.00
   3   8  -2  485.65   22.60
  -3   8   2  476.45   22.10
   2  -8  -2   65.39    3.80
  -2  -8   2   67.59    4.20
   2  -8  -2   71.59    3.90
  -2  -8   2   71.99    4.30
   2  -8  -2   65.49    3.90
  -2  -8   2   66.99    3.60
  -2   8   2   69.19    3.70
  -2   8   2   67.89    3.80
   2   8  -2   70.09    4.20
  -2   8   2   71.09    4.00
   2   8  -2   65.89    3.70
   2   8  -2   70.89    4.30
  -1  -8   2  144.89    7.80
  -1  -8   2  148.79    7.10
   1  -8  -2  143.89    7.30
  -1  -8   2  141.99    7.70
  -1  -8   2  151.68    7.10
   1  -8  -2  146.99    7.50
   1  -8  -2  151.68    7.40
   1   8  -2  138.49    7.90
   1   8  -2  137.59    7.10
   1   8  -2  144.79    7.10
  -1   8   2  142.69    7.20
  -1   8   2  144.39    7.30
  -1   8   2  149.99    7.60
   0  -8   2   14.60    1.00
   0  -8  -2   15.10    1.30
   0  -8   2   15.80    1.30
   0  -8  -2   14.70    1.30
   0  -8   2   13.20    1.50
   0   8  -2   15.60    1.70
   0   8   2   12.90    1.10
   0   8  -2   13.30    1.20
   0   8  -2   14.10    1.00
   0   8   2   12.20    1.30
   0   8   2   14.20    1.40
   1  -8   2   14.80    1.40
  -1  -8  -2   12.00    1.20
   1  -8   2   13.40    0.80
  -1  -8  -2   13.00    1.20
  -1  -8  -2   11.70    1.20
   1  -8   2   11.30    1.60
  -1   8  -2   13.80    1.90
  -1   8  -2   12.50    1.20
  -1   8  -2   12.50    0.80
   1   8   2   11.40    1.20
   1   8   2   11.80    1.00
   1   8   2   12.90    1.40
   2  -8   2 1246.28   60.49
  -2  -8  -2 1284.27   59.89
   2  -8   2 1363.96   60.09
   2   8   2 1336.87   59.89
  -2   8  -2 1220.08   59.99
   2   8   2 1348.47   59.99
  -2   8  -2 1261.37   60.59
   3  -8   2   37.20    2.60
  -3  -8  -2   33.70    2.60
   3   8   2   32.90    2.50
   3   8   2   36.90    2.70
   3   8   2   36.30    2.50
  -4  -8  -2  124.99    6.70
   4  -8   2  134.59    7.00
   4   8   2  122.59    6.70
   4   8   2  134.69    6.80
   4   8   2  117.69    6.40
  -4   8  -2  126.19    7.30
   4   8   2  119.09    6.90
   5  -8   2  270.47   14.60
  -5  -8  -2  269.87   14.30
   5  -8   2  309.77   14.60
   5   8   2  287.47   14.40
   5   8   2  296.77   14.00
   5   8   2  275.37   14.50
  -5   8  -2  291.37   14.90
   5   8   2  293.77   14.20
   6  -8   2   34.20    2.90
   6  -8   2   34.80    2.80
   6   8   2   31.90    2.80
  -6   8  -2   30.60    1.90
   6   8   2   34.40    2.60
   6   8   2   37.20    2.80
   7  -8   2   52.59    3.90
   7  -8   2   56.09    3.80
   7   8   2   49.70    3.70
  -7   8  -2   46.70    2.70
   7   8   2   48.50    3.40
   7   8   2   46.20    3.60
   7   8   2   48.00    3.30
   8  -8   2    6.90    1.40
   8  -8   2    6.50    1.70
   8   8   2    5.80    1.40
   8   8   2    8.90    1.40
   8   8   2    7.20    1.50
   8   8   2    9.40    1.80
   9  -8   2   29.00    2.70
   9  -8   2   27.20    3.00
   9   8   2   21.90    2.40
   9   8   2   24.30    3.10
  -9   8  -2   22.40    1.80
   9   8   2   23.60    2.80
   9   8   2   18.70    2.20
  10  -8   2   53.89    4.50
  10  -8   2   53.09    4.00
  10   8   2   51.99    4.20
  10   8   2   51.39    4.20
  10   8   2   48.00    3.80
  10   8   2   41.40    3.40
  11  -8   2    3.70    1.50
  11  -8   2    9.90    2.10
  11   8   2    6.60    1.70
  11   8   2    5.20    1.40
  11   8   2    9.10    2.20
  11   8   2    4.30    1.50
  12  -8   2   11.70    2.60
  12  -8   2   11.50    2.20
  12   8   2   12.00    1.90
  12   8   2   14.20    2.50
  12   8   2   14.60    2.30
  12   8   2   15.30    2.80
  13  -8   2   37.40    4.20
  13  -8   2   35.30    3.50
  13   8   2   36.00    3.60
  13   8   2   33.90    3.00
  13   8   2   31.30    4.20
  13   8   2   30.80    3.50
  14  -8   2    0.00    1.50
  14  -8   2    0.50    1.40
  14   8   2    2.20    1.60
  14   8   2    1.90    1.40
  14   8   2   -1.60    1.40
  16  -9  -2    1.10    1.50
  16  -9  -2    2.00    1.60
  16   9  -2    1.30    1.40
  16   9  -2    0.10    1.40
  16   9  -2    2.20    1.90
  15  -9  -2   11.20    2.30
  15  -9  -2   12.50    3.10
  15   9  -2   11.60    2.00
  15   9  -2   12.40    2.70
  15   9  -2   11.70    2.30
  14  -9  -2    5.30    1.90
  14  -9  -2    3.60    1.40
  14   9  -2    4.40    2.00
  14   9  -2    5.70    1.40
  14   9  -2    3.30    1.70
  13  -9  -2   28.10    4.10
  13  -9  -2   36.80    3.50
  13   9  -2   27.20    3.20
  13   9  -2   33.20    3.70
  13   9  -2   34.40    2.60
  12  -9  -2   14.20    2.70
  12  -9  -2    9.90    2.00
  12   9  -2   10.60    2.00
  12   9  -2    9.60    1.40
  12   9  -2    8.80    2.40
  11  -9  -2    1.80    1.00
  11  -9  -2    1.20    1.20
  11   9  -2    2.20    1.30
  11   9  -2    2.70    0.90
  11   9  -2    3.80    1.20
  10  -9  -2  148.39    9.50
 -10  -9   2  162.08    8.40
  10  -9  -2  151.08    9.50
  10   9  -2  160.98    9.10
  10   9  -2  157.28    9.00
  10   9  -2  156.88    9.50
  -9  -9   2   17.70    1.60
   9  -9  -2   15.90    1.80
   9  -9  -2   16.20    2.00
   9  -9  -2   15.70    2.50
   9   9  -2   17.80    1.40
   9   9  -2   18.40    2.50
   9   9  -2   20.20    2.10
   9   9  -2   17.80    2.80
   8  -9  -2    0.80    0.60
   8  -9  -2    2.80    0.90
   8  -9  -2    2.30    1.00
  -8  -9   2    3.60    0.70
   8   9  -2    2.60    0.70
   8   9  -2    3.80    1.20
   8   9  -2    4.70    1.30
   7  -9  -2   82.99    5.40
   7  -9  -2   81.09    5.00
   7  -9  -2   84.59    4.80
   7   9  -2   82.69    5.20
  -7   9   2   82.39    4.80
   7   9  -2   79.39    5.40
   7   9  -2   80.79    5.00
   6  -9  -2   22.80    2.00
   6  -9  -2   28.50    2.30
   6  -9  -2   27.60    2.50
  -6   9   2   21.50    2.00
   6   9  -2   27.50    2.50
   6   9  -2   22.10    2.10
  -6   9   2   23.50    1.90
   6   9  -2   23.00    2.20
   5  -9  -2    8.10    1.50
   5  -9  -2    6.80    1.20
  -5   9   2    7.40    1.10
   5   9  -2    7.90    1.50
  -5   9   2    9.00    1.40
   5   9  -2    6.30    1.40
   5   9  -2    6.90    1.20
   4  -9  -2   44.30    3.10
   4  -9  -2   43.30    2.90
  -4   9   2   47.70    3.10
   4   9  -2   43.10    4.00
   4   9  -2   48.20    3.00
  -4   9   2   47.40    2.90
   4   9  -2   45.30    3.30
  -3  -9   2   86.49    4.70
   3  -9  -2   91.49    5.20
   3  -9  -2   87.89    5.10
   3   9  -2   87.39    4.90
  -3   9   2   94.59    5.20
  -3   9   2   89.49    4.90
   3   9  -2   88.49    5.70
   3   9  -2   91.59    5.50
  -3   9   2   93.39    4.80
  -2  -9   2  304.27   14.70
  -2  -9   2  323.77   15.80
   2  -9  -2  311.67   15.00
   2  -9  -2  301.27   15.00
   2  -9  -2  312.27   15.00
  -2  -9   2  297.87   15.40
  -2   9   2  328.07   15.30
  -2   9   2  308.57   14.90
   2   9  -2  311.47   14.80
   2   9  -2  306.27   15.60
   2   9  -2  304.77   15.40
  -2   9   2  315.07   14.80
   1  -9  -2   25.50    1.90
  -1  -9   2   23.50    1.50
   1  -9  -2   24.70    1.90
   1  -9  -2   22.50    1.80
  -1  -9   2   25.20    1.60
  -1  -9   2   27.00    2.20
  -1  -9   2   21.20    2.00
  -1   9   2   25.00    2.00
   1   9  -2   20.10    2.10
  -1   9   2   23.70    1.80
   1   9  -2   24.50    1.60
   1   9  -2   22.20    1.50
  -1   9   2   25.00    1.80
   0  -9   2    0.50    0.50
   0  -9   2    0.10    0.20
   0  -9   2   -0.10    0.50
   0  -9  -2   -0.40    0.50
   0  -9  -2    0.30    0.40
   0  -9  -2    0.30    0.40
   0   9   2    0.20    0.30
   0   9  -2    0.10    0.50
   0   9   2    0.50    0.50
   0   9  -2    0.00    0.20
   0   9  -2    0.20    0.40
   0   9   2   -0.10    0.30
   1  -9   2  153.48    7.20
  -1  -9  -2  148.99    7.80
   1  -9   2  161.48    7.80
  -1   9  -2  160.48    8.60
   1   9   2  153.78    7.80
   1   9   2  144.39    7.50
  -1   9  -2  155.18    7.20
   1   9   2  147.59    8.00
  -1   9  -2  148.29    7.80
  -2  -9  -2   12.70    1.60
   2  -9   2   13.20    1.70
   2   9   2    8.70    1.40
   2   9   2   10.40    1.30
   2   9   2    8.00    1.20
  -3  -9  -2   21.60    1.90
   3  -9   2   24.60    2.10
   3   9   2   22.10    2.00
  -3   9  -2   23.20    2.40
   3   9   2   24.90    1.90
   3   9   2   21.10    1.90
   4  -9   2    2.60    1.00
  -4  -9  -2    1.20    0.80
   4   9   2    1.70    0.70
   4   9   2    1.30    0.80
   4   9   2    1.20    0.60
  -4   9  -2    1.10    0.80
   4   9   2    2.80    0.70
   5  -9   2    0.80    0.70
   5   9   2    1.40    0.60
   5   9   2    0.40    0.50
  -5   9  -2    1.00    0.80
   5   9   2    0.90    0.80
   5   9   2    0.30    0.50
   6  -9   2  117.29    7.30
   6  -9   2  133.99    7.10
  -6   9  -2  117.59    5.80
   6   9   2  124.79    7.20
   6   9   2  112.59    6.70
   6   9   2  124.59    6.80
   6   9   2  121.39    7.00
   7  -9   2   40.40    3.20
   7  -9   2   34.40    3.20
  -7   9  -2   34.20    2.10
   7   9   2   37.70    2.90
   7   9   2   41.60    3.20
   7   9   2   34.00    3.00
   7   9   2   37.30    2.60
   8  -9   2   11.10    2.10
   8  -9   2    9.80    1.80
   8   9   2   10.80    1.70
   8   9   2   10.70    1.80
   8   9   2    8.20    1.70
   8   9   2   13.60    2.10
   9  -9   2   67.99    5.20
   9  -9   2   70.29    4.80
   9   9   2   64.39    4.90
   9   9   2   67.49    4.40
   9   9   2   69.29    4.80
  -9   9  -2   67.99    3.80
   9   9   2   70.79    5.00
  10  -9   2   16.70    2.50
  10  -9   2   16.90    3.00
  10   9   2   17.10    2.90
  10   9   2   14.40    1.90
 -10   9  -2   19.30    1.90
  10   9   2   12.00    2.10
  10   9   2   15.20    2.50
  11  -9   2    3.80    1.70
  11  -9   2    1.40    1.20
  11   9   2    3.20    1.40
  11   9   2    2.00    1.10
  11   9   2    3.70    1.40
  11   9   2    2.70    1.30
  12  -9   2   16.20    2.90
  12  -9   2   11.70    2.20
  12   9   2   10.40    2.00
  12   9   2   11.70    2.50
  12   9   2   12.20    2.20
  12   9   2   10.20    1.70
  13  -9   2   -0.50    1.70
  13  -9   2    5.10    1.70
  13   9   2    2.00    1.40
  13   9   2    8.40    1.70
  13   9   2    4.80    1.70
  13   9   2    2.00    1.80
  14  -9   2   12.90    2.90
  14  -9   2   10.10    2.30
  14   9   2    8.90    2.40
  14   9   2   12.10    2.20
  14   9   2   14.10    2.60
  16 -10  -2    3.20    1.60
  16  10  -2    2.10    1.80
  16  10  -2   -0.20    1.80
  15 -10  -2    0.40    1.60
  15 -10  -2    0.50    1.10
  15  10  -2    1.10    1.40
  15  10  -2   -0.90    1.20
  15  10  -2    1.80    1.60
  14 -10  -2   59.09    4.70
  14 -10  -2   51.09    5.20
  14  10  -2   47.80    4.80
  14  10  -2   46.40    3.50
  14  10  -2   47.30    4.30
  13 -10  -2   44.00    4.50
  13 -10  -2   45.00    4.00
  13  10  -2   43.60    4.50
  13  10  -2   39.80    3.00
  12 -10  -2   11.60    2.50
  12 -10  -2   13.00    2.30
  12  10  -2   17.00    2.60
  12  10  -2   19.40    3.10
  12  10  -2   13.10    1.50
  11 -10  -2    6.30    1.50
  11 -10  -2    4.30    1.50
  11  10  -2    4.20    1.80
  11  10  -2    5.90    1.10
  11  10  -2    3.00    1.20
  10 -10  -2   11.10    2.20
  10 -10  -2    8.10    2.00
  10  10  -2   11.10    1.20
  10  10  -2   12.90    2.30
  10  10  -2   12.60    2.10
  10  10  -2   12.00    2.40
   9 -10  -2   56.19    4.20
   9 -10  -2   59.99    4.80
   9  10  -2   65.19    4.40
   9  10  -2   63.99    4.60
   9  10  -2   55.59    4.60
   8 -10  -2    8.80    1.90
   8 -10  -2    9.90    1.70
   8 -10  -2   10.40    1.50
   8  10  -2   11.10    2.10
   8  10  -2   10.00    1.70
   8  10  -2   12.40    2.00
   7 -10  -2   30.30    2.50
   7 -10  -2   30.30    2.50
   7 -10  -2   28.30    2.70
   7  10  -2   32.90    2.80
  -7  10   2   29.10    2.40
   7  10  -2   29.80    2.90
   7  10  -2   32.80    2.70
   6 -10  -2  206.88   11.00
   6 -10  -2  203.58   10.50
   6 -10  -2  215.78   10.60
   6  10  -2  191.78   10.90
   6  10  -2  205.08   10.60
  -6  10   2  201.78   10.50
  -6  10   2  203.88   10.30
   6  10  -2  202.08   11.10
   5 -10  -2    2.20    0.90
   5 -10  -2    3.70    0.90
   5 -10  -2    2.90    0.90
   5  10  -2    2.10    0.80
   5  10  -2    3.20    1.00
  -5  10   2    2.10    0.70
   5  10  -2    3.60    0.90
  -5  10   2    1.90    0.70
   4 -10  -2   37.90    2.70
   4 -10  -2   37.70    2.70
   4  10  -2   36.70    3.00
   4  10  -2   41.70    3.20
  -4  10   2   41.00    2.90
   4  10  -2   43.20    2.80
  -4  10   2   39.60    2.60
   3 -10  -2   16.10    1.50
   3 -10  -2   16.70    1.60
   3 -10  -2   15.10    1.50
  -3  10   2   20.60    1.80
  -3  10   2   18.90    1.50
   3  10  -2   18.70    1.60
   3  10  -2   17.60    1.80
   3  10  -2   17.20    2.40
   2 -10  -2   -0.20    0.30
  -2 -10   2    0.80    0.50
   2 -10  -2    1.20    0.50
   2 -10  -2    0.40    0.50
  -2  10   2    1.70    0.70
  -2  10   2   -0.10    0.40
   2  10  -2    1.00    0.60
  -2  10   2    0.80    0.50
   2  10  -2    0.20    0.40
  -1 -10   2  249.38   11.70
   1 -10  -2  247.48   12.00
   1 -10  -2  232.98   12.10
   1 -10  -2  236.48   12.10
  -1 -10   2  243.68   11.60
   1  10  -2  247.28   11.70
   1  10  -2  242.98   11.80
  -1  10   2  238.78   11.80
  -1  10   2  257.37   12.40
  -1  10   2  246.68   12.00
   1  10  -2  263.17   14.60
   0 -10   2  585.24   26.90
   0 -10  -2  591.64   27.50
   0 -10   2  596.24   27.20
   0 -10  -2  608.94   27.90
   0  10  -2  603.74   28.90
   0  10  -2  537.85   26.90
   0  10   2  590.34   27.80
   0  10   2  555.24   27.10
   0  10  -2  568.84   27.20
  -1 -10  -2   35.30    2.50
   1 -10   2   35.00    1.90
   1 -10   2   36.80    2.40
   1  10   2   34.60    2.70
   1  10   2   34.30    2.40
  -1  10  -2   36.90    3.00
  -1  10  -2   33.90    2.40
   1  10   2   33.80    2.10
  -1  10  -2   34.90    1.90
   2 -10   2   39.30    2.60
  -2 -10  -2   34.50    2.50
  -2  10  -2   36.60    3.00
   2  10   2   32.90    2.20
   2  10   2   33.80    2.70
   2  10   2   34.20    2.50
   3 -10   2    7.90    1.50
  -3 -10  -2    6.90    1.20
   3  10   2    6.40    1.10
   3  10   2    6.60    1.20
  -3  10  -2    8.20    1.70
   3  10   2    5.70    1.20
   4 -10   2   69.89    4.10
  -4 -10  -2   60.29    4.00
   4  10   2   67.39    4.40
   4  10   2   64.89    3.70
   4  10   2   62.19    4.00
  -4  10  -2   62.99    4.50
   4  10   2   62.19    4.00
   5 -10   2  125.69    6.80
   5  10   2  114.29    6.90
   5  10   2  116.19    6.20
   5  10   2  127.39    7.10
   5  10   2  108.29    6.50
  -5  10  -2  123.09    7.30
   6 -10   2   31.10    3.00
   6 -10   2   40.80    3.10
  -6  10  -2   34.50    3.30
   6  10   2   35.40    2.40
   6  10   2   36.10    2.90
   6  10   2   33.80    2.80
   6  10   2   37.40    3.10
   7 -10   2   13.80    2.10
   7 -10   2   11.40    2.10
   7  10   2   10.10    1.90
   7  10   2   13.10    1.50
   7  10   2   10.30    1.80
   7  10   2   13.70    2.00
   8 -10   2   24.50    2.80
   8  10   2   19.00    2.00
  -8  10  -2   21.40    1.50
   8  10   2   22.80    2.50
   8  10   2   23.10    2.40
   8  10   2   22.40    2.40
   9 -10   2    0.60    1.50
   9 -10   2    5.00    1.50
   9  10   2    3.00    1.10
   9  10   2    3.50    1.20
   9  10   2    1.80    1.30
  -9  10  -2    0.90    0.60
   9  10   2    0.50    0.90
  10 -10   2   26.50    2.90
  10 -10   2   32.20    3.50
 -10  10  -2   21.90    2.10
  10  10   2   31.00    2.70
  10  10   2   31.70    3.00
  10  10   2   28.30    3.70
  10  10   2   34.30    3.20
  11 -10   2   12.60    2.70
  11 -10   2    5.30    1.70
  11  10   2    2.80    1.40
  11  10   2    5.90    1.70
  11  10   2    8.30    1.90
  11  10   2    7.70    1.40
  12 -10   2   25.60    2.90
  12 -10   2   29.10    4.00
  12  10   2   19.20    3.20
  12  10   2   24.70    4.50
  12  10   2   22.20    2.40
  12  10   2   25.60    2.80
  13 -10   2   31.00    4.50
  13 -10   2   31.50    3.50
  13  10   2   29.70    3.30
  13  10   2   26.10    3.90
  13  10   2   30.30    3.30
  14 -10   2    0.50    1.50
  14 -10   2   -0.50    1.30
  14  10   2    0.30    1.30
  14  10   2   -1.50    1.60
  14  10   2    0.60    1.40
  15 -11  -2   27.20    5.30
  15  11  -2   23.20    3.40
  15  11  -2   25.10    2.60
  15  11  -2   19.60    3.60
  14 -11  -2    8.70    2.10
  14 -11  -2   12.80    2.90
  14  11  -2   10.20    2.10
  14  11  -2   11.40    1.70
  14  11  -2   12.70    2.90
  13 -11  -2    1.30    1.20
  13 -11  -2   -2.30    1.30
  13  11  -2    1.70    1.40
  13  11  -2   -0.30    1.00
  13  11  -2    3.00    1.00
  12 -11  -2   20.60    3.00
  12 -11  -2   29.70    4.10
  12  11  -2   21.90    3.50
  12  11  -2   20.60    1.80
  12  11  -2   15.90    2.80
  11 -11  -2    6.00    1.70
  11 -11  -2    6.10    2.00
  11  11  -2    5.80    1.60
  11  11  -2    7.70    1.20
  11  11  -2    3.50    1.90
  10 -11  -2  222.38   12.60
  10 -11  -2  232.78   14.20
  10  11  -2  234.08   13.00
  10  11  -2  252.57   12.90
  10  11  -2  240.28   13.40
   9 -11  -2   12.90    2.10
   9 -11  -2   13.90    2.40
  -9  11   2   13.90    1.80
   9  11  -2   11.90    2.10
   9  11  -2   12.50    2.30
   9  11  -2   10.70    1.90
   8 -11  -2    0.90    0.70
   8 -11  -2    1.20    0.80
  -8  11   2   -0.90    0.70
  -8  11   2    0.50    0.50
   8  11  -2   -0.20    0.80
   8  11  -2    0.40    0.70
   8  11  -2    1.20    0.80
   7 -11  -2    1.10    0.70
   7 -11  -2   -0.40    0.50
   7 -11  -2   -0.40    0.40
   7  11  -2    0.80    0.70
  -7  11   2    0.80    0.60
   7  11  -2   -0.60    0.60
   7  11  -2   -0.70    0.60
   6 -11  -2  141.99    7.70
   6 -11  -2  126.39    7.10
   6 -11  -2  130.99    7.20
  -6  11   2  122.49    6.80
   6  11  -2  122.99    7.60
   6  11  -2  136.99    7.30
  -6  11   2  124.39    7.20
   6  11  -2  128.39    7.60
   5 -11  -2  339.97   16.30
   5 -11  -2  312.37   16.20
   5 -11  -2  326.67   16.70
  -5  11   2  336.17   16.00
   5  11  -2  319.27   16.30
  -5  11   2  344.77   16.60
   5  11  -2  324.27   16.80
   5  11  -2  339.97   16.90
   4 -11  -2   13.70    1.80
   4 -11  -2   12.30    1.40
   4  11  -2   13.00    1.50
  -4  11   2   11.40    1.40
   4  11  -2   11.40    1.80
   4  11  -2   15.80    2.20
  -4  11   2   14.10    2.00
   3 -11  -2   60.99    3.80
   3 -11  -2   63.69    3.90
   3 -11  -2   61.19    3.70
  -3  11   2   62.39    4.10
   3  11  -2   63.29    4.40
   3  11  -2   67.09    3.80
   3  11  -2   65.09    4.30
  -3  11   2   57.89    3.60
  -2 -11   2   84.29    4.20
   2 -11  -2   88.19    5.20
   2 -11  -2   90.09    5.00
  -2 -11   2   88.09    4.60
   2  11  -2   86.99    4.70
  -2  11   2   87.59    5.30
   2  11  -2   89.99    5.60
  -2  11   2   85.59    4.60
  -2  11   2   90.39    4.80
   2  11  -2   81.59    4.40
   1 -11  -2  216.88   10.70
   1 -11  -2  215.38   10.90
  -1 -11   2  218.98   10.60
  -1 -11   2  217.58   10.30
  -1  11   2  224.58   12.70
   1  11  -2  208.38   10.40
   1  11  -2  217.98   11.60
   1  11  -2  211.18   10.50
  -1  11   2  218.08   10.50
   0 -11  -2  581.64   27.00
   0 -11   2  586.84   26.50
   0 -11   2  567.14   26.40
   0  11   2  554.64   26.80
   0  11   2  580.74   27.30
   0  11  -2  521.45   26.30
   0  11  -2  582.74   27.80
   1 -11   2    2.70    0.80
   1 -11   2    4.00    0.60
  -1 -11  -2    2.20    0.80
  -1  11  -2    4.70    0.60
   1  11   2    3.60    0.70
   1  11   2    4.70    1.00
  -1  11  -2    4.20    1.00
   1  11   2    4.20    1.10
  -1  11  -2    4.10    1.20
   2 -11   2    0.90    0.30
   2 -11   2    1.50    0.80
  -2 -11  -2    0.60    0.60
   2  11   2    1.00    0.60
  -2  11  -2    0.10    0.70
   2  11   2    1.90    0.80
   2  11   2    0.40    0.40
  -2  11  -2    0.60    0.20
  -3 -11  -2    8.20    1.40
   3 -11   2   12.10    1.40
   3  11   2    9.80    1.80
  -3  11  -2   10.10    1.90
   3  11   2    6.80    1.20
   3  11   2    8.20    1.40
   4 -11   2  343.27   15.40
   4  11   2  319.57   15.50
   4  11   2  259.97   15.10
  -4  11  -2  300.57   16.10
   4  11   2  319.77   15.70
   4  11   2  309.17   14.80
   5 -11   2   75.29    4.40
   5  11   2   62.49    4.20
  -5  11  -2   64.09    4.80
   5  11   2   62.09    4.30
   5  11   2   65.49    4.50
   5  11   2   65.29    3.70
   6 -11   2   -0.10    0.70
   6 -11   2    1.20    0.90
   6  11   2    0.10    0.50
  -6  11  -2   -1.30    0.60
   6  11   2   -0.10    0.70
   6  11   2   -0.10    0.70
   6  11   2    0.70    0.80
   7 -11   2   22.10    2.30
   7 -11   2   21.50    2.90
   7  11   2   23.30    2.60
   7  11   2   19.40    2.10
   7  11   2   18.80    2.20
   7  11   2   16.90    1.80
   8 -11   2    2.00    1.10
   8 -11   2    6.80    1.90
   8  11   2    3.30    1.10
   8  11   2    4.30    1.20
   8  11   2    4.10    1.40
   9 -11   2  106.19    7.10
   9 -11   2  108.09    6.50
   9  11   2  100.49    6.40
   9  11   2   96.69    5.70
  -9  11  -2   95.99    5.10
   9  11   2  108.99    6.80
  10 -11   2    8.50    2.00
  10 -11   2    9.90    2.00
  10  11   2    8.30    2.20
  10  11   2    9.10    1.50
 -10  11  -2    7.40    1.10
  10  11   2    8.90    2.00
  10  11   2   10.60    2.20
  11 -11   2    2.20    1.40
  11 -11   2    2.40    1.20
  11  11   2    0.50    0.90
  11  11   2    1.60    0.90
  11  11   2   -0.40    1.10
  11  11   2    0.70    1.30
  12 -11   2    3.80    1.90
  12 -11   2    3.70    1.40
  12  11   2    6.90    2.00
  12  11   2    5.80    1.60
  12  11   2    4.80    1.30
  12  11   2    7.60    2.00
  13 -11   2    9.60    2.50
  13 -11   2    7.10    2.20
  13  11   2    6.30    1.90
  13  11   2    8.10    1.80
  13  11   2    8.60    2.00
  13  11   2    6.60    2.00
  14 -11   2   28.40    3.40
  14  11   2   24.60    3.60
  14  11   2   30.70    2.80
  14  11   2   33.40    3.60
  15 -12  -2    5.90    3.40
  15 -12  -2    1.90    1.40
 -15  12   2    1.50    1.80
  15  12  -2   -0.50    1.30
  15  12  -2    8.20    2.10
  15  12  -2    3.50    1.80
  14 -12  -2    7.10    2.00
  14 -12  -2    8.80    2.10
  14  12  -2    9.40    1.60
  14  12  -2   10.90    2.20
  14  12  -2   10.00    2.30
  13 -12  -2   23.30    3.60
  13 -12  -2   16.40    2.90
  13  12  -2   20.50    3.60
  13  12  -2   16.60    2.90
  13  12  -2   16.40    1.90
  12 -12  -2    1.50    1.40
  12 -12  -2   -0.80    0.80
 -12  12   2   -1.00    0.90
  12  12  -2    0.40    1.10
  11 -12  -2   22.10    3.40
  11 -12  -2   14.90    2.60
  11  12  -2   18.80    2.90
 -11  12   2   19.20    2.40
  11  12  -2   23.80    3.60
  11  12  -2   22.10    3.00
  10 -12  -2    0.00    1.00
  10 -12  -2   -0.30    0.80
 -10  12   2    1.60    0.80
  10  12  -2    0.50    0.90
  10  12  -2    1.70    1.40
  10  12  -2    1.40    1.10
   9 -12  -2  108.79    7.20
   9  12  -2  103.19    6.80
   9  12  -2  104.19    8.20
  -9  12   2  111.09    6.10
   9  12  -2   95.89    6.90
   8 -12  -2    1.50    0.90
   8 -12  -2    2.10    1.10
   8  12  -2    1.10    1.00
   8  12  -2    3.70    1.40
  -8  12   2    2.50    1.00
   8  12  -2    2.80    1.20
  -8  12   2    2.00    0.90
   7 -12  -2    1.90    1.00
   7 -12  -2    3.20    1.20
   7  12  -2    1.10    0.70
  -7  12   2    1.50    0.70
   7  12  -2    0.30    0.90
   7  12  -2    1.80    0.90
  -7  12   2    2.00    0.80
   6 -12  -2   18.20    1.90
   6 -12  -2   17.30    2.50
  -6  12   2   13.50    2.20
   6  12  -2   18.20    2.60
  -6  12   2   15.10    1.50
   6  12  -2   13.30    1.90
   6  12  -2   18.00    2.60
   5 -12  -2   24.60    2.20
   5 -12  -2   26.50    2.40
   5  12  -2   23.30    2.40
   5  12  -2   22.10    2.40
  -5  12   2   23.40    2.30
  -5  12   2   25.50    2.00
   5  12  -2   24.10    2.10
   4 -12  -2  249.38   12.40
   4  12  -2  242.68   12.30
  -4  12   2  246.98   12.10
  -4  12   2  247.48   12.80
   4  12  -2  240.08   12.90
   4  12  -2  247.38   13.10
   3 -12  -2   89.99    5.10
   3 -12  -2   88.29    5.10
   3  12  -2   89.99    5.60
  -3  12   2   92.09    5.00
   3  12  -2   80.69    5.60
   3  12  -2   90.69    5.00
   2 -12  -2   37.60    2.70
  -2 -12   2   35.90    2.10
  -2 -12   2   39.20    2.60
   2 -12  -2   46.00    3.10
  -2  12   2   37.60    3.00
   2  12  -2   38.90    3.20
   2  12  -2   37.80    2.20
   1 -12  -2   71.29    4.00
  -1 -12   2   65.49    3.50
  -1 -12   2   62.79    3.70
   1  12  -2   71.39    4.80
   1  12  -2   64.39    3.60
   1  12  -2   64.19    3.70
  -1  12   2   65.19    3.70
  -1  12   2   68.59    3.90
  -1  12   2   71.29    4.50
   0 -12   2   79.89    4.20
   0 -12   2   75.19    4.10
   0 -12  -2   76.29    4.70
   0  12  -2   70.99    4.00
   0  12  -2   74.99    4.30
   0  12   2   83.79    5.00
   0  12  -2   80.39    5.30
   0  12   2   77.29    4.10
   0  12   2   80.19    4.50
  -1 -12  -2   12.20    1.60
   1 -12   2   16.10    1.90
   1 -12   2   11.30    1.00
   1  12   2   15.50    2.10
  -1  12  -2   14.50    2.20
   1  12   2   12.70    1.40
   1  12   2   10.90    1.10
  -1  12  -2   11.80    1.00
  -1  12  -2   12.80    1.50
   2 -12   2   85.69    4.80
  -2 -12  -2   81.19    5.00
   2 -12   2   83.49    4.20
   2  12   2   89.29    5.40
  -2  12  -2   85.79    5.70
   2  12   2   82.09    4.90
   2  12   2   77.69    4.40
  -2  12  -2   90.79    4.10
   3 -12   2  112.19    5.90
   3  12   2   96.99    5.30
   3  12   2  107.49    5.90
   3  12   2  110.89    6.40
  -3  12  -2  102.19    6.60
   3  12   2   98.19    5.90
   4 -12   2   54.99    3.50
   4  12   2   45.80    3.40
   4  12   2   48.70    3.50
   4  12   2   49.70    3.00
  -4  12  -2   51.89    4.10
   4  12   2   51.99    3.80
   5 -12   2   11.20    1.70
  -5  12  -2   10.60    2.00
   5  12   2    9.40    1.60
   5  12   2    8.00    1.70
   5  12   2    9.70    1.60
   5  12   2    9.20    1.10
   6 -12   2    1.00    0.70
   6 -12   2    0.70    0.80
   6  12   2    0.70    0.80
   6  12   2    1.90    0.90
   6  12   2    0.90    0.80
   6  12   2    0.70    0.70
  -6  12  -2    1.10    1.10
   7 -12   2   19.50    2.90
   7 -12   2   20.50    2.30
   7  12   2   24.50    2.50
   7  12   2   21.90    2.30
   7  12   2   22.20    2.60
   8 -12   2  105.09    6.90
   8 -12   2   95.79    6.10
   8  12   2   95.29    6.20
   8  12   2  101.69    6.50
   8  12   2   95.29    5.50
   8  12   2  103.49    6.70
   9 -12   2    0.70    1.00
   9 -12   2    0.40    1.00
   9  12   2    0.60    1.10
   9  12   2   -0.10    1.00
   9  12   2    0.90    1.00
   9  12   2    1.20    1.00
  10 -12   2   22.40    3.50
  10 -12   2   23.40    2.80
  10  12   2   21.50    3.10
  10  12   2   19.30    2.70
  10  12   2   25.20    3.30
  10  12   2   18.70    2.00
  11 -12   2    0.80    1.20
  11 -12   2   -0.30    1.30
  11  12   2    0.80    1.00
  11  12   2   -1.70    0.80
  11  12   2   -0.30    1.10
  12 -12   2   14.00    2.80
  12 -12   2   15.30    2.70
  12  12   2   16.60    3.00
  12  12   2   13.30    2.60
  12  12   2   11.90    1.80
  12  12   2   15.90    2.70
  13 -12   2   10.00    2.70
  13 -12   2   14.20    2.70
  13  12   2   14.30    2.60
  13  12   2   11.50    1.90
  13  12   2   13.70    2.50
  13  12   2    9.60    2.60
  15 -13  -2    6.60    2.00
  15 -13  -2    7.60    2.50
 -15  13   2    7.60    2.30
  15  13  -2    4.10    1.90
  15  13  -2    6.90    2.30
  14 -13  -2    1.80    1.50
  14 -13  -2    3.20    1.30
 -14  13   2    4.00    1.70
  14  13  -2    8.00    2.20
  14  13  -2    3.40    1.60
  13 -13  -2    1.20    1.30
  13 -13  -2    1.20    1.20
 -13  13   2    5.20    1.50
  13  13  -2    6.10    2.00
  13  13  -2    2.50    1.90
  12 -13  -2    1.30    1.00
  12 -13  -2    0.80    1.20
 -12  13   2    2.10    1.00
  12  13  -2    1.50    1.00
  12  13  -2    0.30    1.30
  11 -13  -2   20.00    3.50
  11 -13  -2   15.50    2.60
  11  13  -2   22.50    3.20
  11  13  -2   23.00    3.10
  11  13  -2   16.30    3.10
 -11  13   2   18.10    2.20
  10 -13  -2    6.50    1.70
  10 -13  -2    7.30    1.90
  10  13  -2    6.00    1.70
  10  13  -2    7.70    1.90
  10  13  -2    6.70    1.90
 -10  13   2    8.50    1.50
   9 -13  -2    8.70    1.80
   9 -13  -2    3.50    1.30
   9  13  -2    8.90    2.20
  -9  13   2    5.90    1.20
   9  13  -2    6.30    1.60
   9  13  -2    3.90    1.20
   8 -13  -2   81.99    5.50
   8 -13  -2   90.69    6.10
  -8  13   2   94.39    5.20
   8  13  -2   90.59    5.70
   8  13  -2   90.59    6.10
  -8  13   2   76.39    5.40
   8  13  -2   86.29    6.10
   7 -13  -2   71.39    5.10
   7 -13  -2   68.09    4.60
  -7  13   2   69.49    4.20
   7  13  -2   72.89    4.70
  -7  13   2   71.09    4.70
   7  13  -2   67.39    5.00
   7  13  -2   66.19    5.00
   6 -13  -2   25.60    2.70
   6 -13  -2   25.50    2.40
   6  13  -2   21.20    3.00
   6  13  -2   26.00    2.40
  -6  13   2   28.80    2.60
   6  13  -2   28.20    2.90
   5 -13  -2  205.78   10.70
  -5  13   2  202.38   11.00
   5  13  -2  213.68   11.30
   5  13  -2  197.58   11.30
   5  13  -2  202.48   10.60
  -5  13   2  204.08   11.00
   4 -13  -2   42.10    3.00
   4  13  -2   37.80    3.50
   4  13  -2   44.20    3.50
  -4  13   2   42.20    3.30
   4  13  -2   41.40    3.00
   3 -13  -2  158.78    8.30
  -3  13   2  156.68    8.10
   3  13  -2  154.38    8.10
   3  13  -2  155.48    9.10
  -3  13   2  156.38    8.70
   2 -13  -2   65.59    3.90
  -2 -13   2   62.69    3.20
   2  13  -2   58.79    3.30
  -2  13   2   69.69    4.50
  -2  13   2   61.39    3.70
   2  13  -2   63.99    3.70
   2  13  -2   61.09    4.50
  -1 -13   2  255.67   12.80
   1 -13  -2  265.87   13.40
  -1 -13   2  266.77   12.60
  -1  13   2  257.57   12.70
   1  13  -2  258.27   14.10
  -1  13   2  269.07   13.00
  -1  13   2  284.67   13.80
   1  13  -2  269.07   12.80
   1  13  -2  254.37   12.70
   0 -13   2  398.96   18.50
   0  13  -2  350.66   18.40
   0  13   2  402.96   18.90
   0  13   2  390.16   18.50
   0  13  -2  391.96   18.70
   0  13  -2  399.16   20.00
   0  13   2  407.06   19.60
   1 -13   2   55.09    3.00
   1 -13   2   53.49    3.20
  -1  13  -2   48.10    2.80
   1  13   2   56.39    3.90
   1  13   2   50.39    3.40
  -1  13  -2   52.69    4.20
   2 -13   2  127.79    6.70
   2 -13   2  122.79    6.20
   2  13   2  122.19    6.30
   2  13   2  118.99    6.80
  -2  13  -2  127.69    7.80
  -2  13  -2  137.79    6.10
   2  13   2  127.69    7.50
   3 -13   2    0.80    0.70
   3  13   2    0.80    0.60
   3  13   2    0.10    0.40
  -3  13  -2    0.90    0.80
   3  13   2    0.80    0.70
   4 -13   2  305.57   14.30
   4  13   2  286.17   14.50
  -4  13  -2  283.87   15.30
   4  13   2  259.67   13.60
   4  13   2  287.27   14.40
   4  13   2  295.47   15.00
   4  13   2  287.37   13.80
   5 -13   2   43.20    3.20
   5  13   2   42.40    3.20
   5  13   2   37.70    3.00
   5  13   2   38.20    2.50
  -5  13  -2   39.90    3.60
   5  13   2   41.20    3.50
   6 -13   2   30.80    3.10
   6 -13   2   36.10    2.90
   6  13   2   32.20    2.20
   6  13   2   32.40    2.80
   6  13   2   32.20    3.10
  -6  13  -2   35.50    3.40
   6  13   2   32.40    2.90
   7 -13   2   45.50    3.90
   7  13   2   38.60    2.70
   7  13   2   39.00    3.40
   7  13   2   41.20    3.70
  -7  13  -2   37.70    3.80
   8 -13   2    7.20    1.90
   8 -13   2    3.20    1.40
   8  13   2    5.20    1.50
   8  13   2    5.30    1.40
   8  13   2    2.80    1.10
   9 -13   2   23.90    2.60
   9 -13   2   26.90    3.70
   9  13   2   27.90    3.00
   9  13   2   27.00    2.70
   9  13   2   20.00    2.00
   9  13   2   24.70    3.30
  10 -13   2    1.10    1.10
  10 -13   2   -0.40    1.20
  10  13   2    1.70    1.10
  10  13   2    0.90    1.30
  10  13   2    0.20    0.90
  10  13   2   -0.70    1.10
  11 -13   2   -0.70    0.90
  11 -13   2   -1.40    0.80
  11  13   2    0.90    1.40
  11  13   2    3.10    1.70
  11  13   2   -0.30    1.00
  11  13   2    1.40    1.10
  12 -13   2   11.30    2.20
  12 -13   2   15.00    3.10
  12  13   2   12.40    2.40
  12  13   2   14.30    2.60
  12  13   2   10.90    1.80
  12  13   2   14.50    2.90
  13 -13   2    4.50    1.70
  13 -13   2    6.80    2.50
  13  13   2    4.50    1.70
  13  13   2    1.90    1.70
  13  13   2    4.20    1.50
  15 -14  -2   15.10    2.90
  15 -14  -2   16.80    3.40
  15  14  -2   16.10    2.90
  15  14  -2   10.00    2.50
  14 -14  -2    3.50    1.80
  14 -14  -2    3.50    2.00
  14  14  -2    2.30    1.80
 -14  14   2   -1.00    1.30
  14  14  -2    0.70    1.80
  13 -14  -2    5.60    1.70
  13 -14  -2    4.00    1.80
 -13  14   2    4.30    1.40
  13  14  -2    3.10    1.80
  13  14  -2    7.40    2.30
  12 -14  -2   27.10    4.00
  12 -14  -2   27.60    3.00
  12  14  -2   21.40    3.20
  12  14  -2   28.20    4.10
 -12  14   2   21.10    2.50
  11 -14  -2    8.90    1.90
  11 -14  -2    7.70    2.10
  11  14  -2    5.70    1.70
 -11  14   2    8.90    1.50
  11  14  -2    9.30    2.30
  11  14  -2    7.50    2.10
  10 -14  -2   -0.90    0.70
  10 -14  -2    0.20    0.90
 -10  14   2   -0.40    0.70
  10  14  -2    0.90    1.10
  10  14  -2   -1.00    0.90
   9 -14  -2    0.90    0.80
   9 -14  -2    0.20    0.80
  -9  14   2   -1.30    0.90
   9  14  -2   -0.10    0.90
   9  14  -2    0.30    0.90
  -9  14   2   -0.10    0.60
   9  14  -2    1.10    1.10
   8 -14  -2    2.70    1.10
   8 -14  -2    2.20    1.10
   8  14  -2    3.50    1.40
   8  14  -2    2.80    1.20
  -8  14   2    2.80    0.90
  -8  14   2    2.10    1.00
   8  14  -2    2.10    1.20
   7 -14  -2   21.10    2.20
   7 -14  -2   20.70    2.90
   7  14  -2   19.00    2.90
  -7  14   2   15.80    2.40
   7  14  -2   17.00    2.70
  -7  14   2   19.90    1.80
   7  14  -2   20.10    2.20
   6 -14  -2    7.10    1.60
   6 -14  -2    8.00    1.60
  -6  14   2    7.20    1.60
   6  14  -2    8.40    1.60
  -6  14   2    6.70    1.10
   6  14  -2    7.00    1.70
   6  14  -2    6.80    1.70
   5 -14  -2   91.69    5.60
   5  14  -2   90.39    5.50
  -5  14   2   92.79    5.20
   5  14  -2   96.19    6.10
   5  14  -2   95.09    6.30
  -5  14   2   89.59    5.90
   4 -14  -2  155.38    8.00
  -4  14   2  149.09    8.50
  -4  14   2  142.29    7.60
   4  14  -2  140.39    8.40
   4  14  -2  145.79    7.90
   4  14  -2  135.39    8.60
   3 -14  -2  100.69    5.60
   3  14  -2  104.09    5.60
  -3  14   2   95.99    6.10
  -3  14   2   89.09    5.30
   3  14  -2   97.19    6.40
  -2 -14   2  126.09    6.00
   2 -14  -2  123.69    6.70
  -2  14   2  128.89    7.40
   2  14  -2  115.19    6.10
   2  14  -2  127.09    6.60
   2  14  -2  117.49    7.50
  -2  14   2  121.29    6.50
   1 -14  -2    1.60    0.80
  -1 -14   2    2.40    0.70
  -1 -14   2    2.50    0.70
  -1  14   2    2.90    1.00
   1  14  -2    3.00    0.80
   1  14  -2    2.10    1.00
  -1  14   2    2.30    0.80
   0 -14   2   30.50    2.00
   0 -14   2   30.50    2.00
   0  14   2   29.80    1.90
   0  14  -2   23.60    1.90
   0  14  -2   28.10    2.10
   0  14   2   25.60    2.60
   0  14   2   32.10    2.30
   0  14  -2   32.70    3.10
   1 -14   2  203.28    9.90
   1 -14   2  202.88    9.80
  -1  14  -2  213.18   11.40
   1  14   2  197.88    9.70
   1  14   2  199.58   10.20
   1  14   2  203.88   10.90
  -1  14  -2  181.08    9.60
   2 -14   2   92.79    4.90
   2 -14   2   99.99    5.40
   2  14   2  100.59    6.20
  -2  14  -2  103.39    6.70
   2  14   2   98.29    5.60
  -2  14  -2  102.99    4.80
   2  14   2   87.09    5.00
   3 -14   2  276.27   13.10
  -3  14  -2  261.77   14.30
   3  14   2  248.48   12.50
   3  14   2  248.78   13.80
   3  14   2  269.07   13.20
   4 -14   2   46.00    3.20
   4  14   2   44.60    3.30
   4  14   2   44.60    3.70
   4  14   2   45.60    3.30
   4  14   2   42.90    2.70
  -4  14  -2   44.40    3.90
   4  14   2   40.60    2.60
   5 -14   2   11.40    1.80
  -5  14  -2    9.60    2.20
   5  14   2   11.00    2.00
   5  14   2    9.50    1.10
   5  14   2    8.60    1.60
   5  14   2   10.70    1.10
   5  14   2   12.60    1.90
   6 -14   2   14.60    2.20
   6  14   2   14.10    1.40
   6  14   2   11.00    2.00
  -6  14  -2   13.40    2.60
   6  14   2   17.00    2.20
   6  14   2   14.20    2.50
   7 -14   2   -0.50    0.80
   7 -14   2    0.90    1.00
   7  14   2    0.90    1.00
   7  14   2   -0.20    0.60
   7  14   2    0.20    0.80
  -7  14  -2   -0.40    1.00
   7  14   2    0.70    0.80
   8 -14   2    8.40    1.90
   8 -14   2    6.10    1.80
   8  14   2    5.30    1.50
   8  14   2    3.20    1.60
   8  14   2   10.90    2.20
   8  14   2    6.00    1.50
   9 -14   2    1.10    1.10
   9 -14   2    2.00    1.30
   9  14   2   -0.20    1.00
   9  14   2    0.60    1.20
   9  14   2    0.90    0.80
   9  14   2    0.20    0.70
  10 -14   2    0.30    1.00
  10 -14   2    1.30    0.90
  10  14   2   -0.70    0.80
  10  14   2    2.00    1.20
  10  14   2    1.80    1.10
  10  14   2    0.80    1.30
  11 -14   2   22.60    3.60
  11 -14   2   15.50    2.60
  11  14   2   18.10    2.90
  11  14   2   22.30    3.20
  11  14   2   20.00    3.20
  11  14   2   15.90    1.90
  12 -14   2    5.70    1.70
  12 -14   2    8.80    2.10
  12  14   2    4.90    1.40
  12  14   2    6.00    2.10
  12  14   2    5.10    1.90
  12  14   2    4.60    1.70
  13 -14   2    0.80    1.30
  13  14   2    0.00    1.60
  13  14   2    0.90    1.50
  13  14   2    1.10    1.30
  13  14   2   -0.90    1.30
  14 -15  -2    3.40    1.70
 -14  15   2    4.20    1.60
  14  15  -2    0.80    1.50
  14  15  -2    4.60    2.10
  13 -15  -2   -1.90    1.20
  13 -15  -2    0.70    1.10
  13  15  -2    0.90    1.70
  13  15  -2   -0.40    1.30
 -13  15   2   -0.10    1.00
  12 -15  -2   30.50    4.30
  12 -15  -2   26.50    3.00
 -12  15   2   27.80    2.60
  12  15  -2   25.60    4.00
  12  15  -2   32.70    3.70
  11 -15  -2   26.20    4.00
  11 -15  -2   33.80    3.30
 -11  15   2   31.80    2.70
  11  15  -2   32.30    3.50
  11  15  -2   33.10    3.40
  11  15  -2   29.10    4.20
  10 -15  -2   41.00    3.70
  10 -15  -2   45.90    4.40
  10  15  -2   45.30    3.90
  10  15  -2   46.80    4.30
 -10  15   2   46.10    3.20
  10  15  -2   46.50    7.30
   9 -15  -2   25.30    2.70
   9 -15  -2   28.50    3.20
  -9  15   2   24.60    2.70
   9  15  -2   28.20    3.30
   9  15  -2   25.90    3.70
   9  15  -2   28.20    2.80
  -9  15   2   25.80    2.20
   8 -15  -2   48.20    4.30
   8 -15  -2   48.50    6.90
   8  15  -2   47.50    4.30
  -8  15   2   48.50    3.90
   8  15  -2   50.09    4.30
   8  15  -2   49.80    4.40
  -8  15   2   49.80    3.30
   7 -15  -2    4.40    1.50
   7 -15  -2    3.50    1.20
  -7  15   2    5.60    1.20
  -7  15   2    5.60    1.50
   7  15  -2    6.50    1.40
   7  15  -2    5.50    1.50
   7  15  -2    6.00    1.70
   6 -15  -2   -0.40    0.70
   6 -15  -2    0.80    0.80
  -6  15   2    0.90    0.70
   6  15  -2    0.60    0.70
   6  15  -2    0.80    1.10
  -6  15   2    0.70    0.90
   6  15  -2    2.40    1.20
   5 -15  -2    2.10    0.90
   5  15  -2    2.10    1.00
  -5  15   2    1.20    0.60
   5  15  -2    3.10    1.20
  -5  15   2    1.40    1.00
   5  15  -2    0.80    0.80
   4 -15  -2   43.70    3.20
   4  15  -2   41.00    3.10
   4  15  -2   42.70    3.60
  -4  15   2   39.10    3.50
  -4  15   2   46.50    2.90
   4  15  -2   44.30    3.90
   3 -15  -2   55.59    3.80
  -3  15   2   59.59    3.60
  -3  15   2   59.59    4.40
   3  15  -2   58.69    3.70
   3  15  -2   59.09    4.60
   2 -15  -2   53.39    3.60
  -2 -15   2   57.19    3.00
  -2  15   2   55.59    3.40
  -2  15   2   50.09    4.10
   2  15  -2   59.19    3.50
   2  15  -2   48.00    4.20
   2  15  -2   51.99    3.00
  -1 -15   2   84.09    4.40
   1 -15  -2   85.79    4.90
  -1  15   2   85.99    5.60
   1  15  -2   77.39    4.60
   1  15  -2   84.89    4.70
   1  15  -2   81.69    5.80
  -1  15   2   83.39    4.80
   0 -15   2  199.18    9.40
   0  15   2  183.18    9.20
   0  15  -2  172.38    9.20
   0  15  -2  179.38    9.50
   0  15   2  192.28   10.50
   0  15   2  199.28    9.70
   0  15  -2  184.38   10.80
   1 -15   2    1.10    0.70
   1 -15   2    1.50    0.60
  -1  15  -2    1.40    0.80
   1  15   2    1.70    0.60
   1  15   2    0.70    0.60
  -1  15  -2    1.50    0.50
   1  15   2    1.40    0.90
   2 -15   2    5.00    1.10
   2 -15   2    5.30    0.80
   2  15   2    4.00    1.10
   2  15   2    6.10    1.50
  -2  15  -2    4.10    1.50
  -2  15  -2    5.90    0.70
   3 -15   2    4.90    1.30
  -3  15  -2    4.40    1.60
   3  15   2    6.40    1.50
   3  15   2    5.30    0.80
   3  15   2    5.20    1.20
  -3  15  -2    5.00    0.50
   4 -15   2    4.00    1.20
  -4  15  -2    1.50    1.20
   4  15   2    4.30    1.10
   4  15   2    4.40    0.80
   4  15   2    1.80    1.10
   5 -15   2    1.00    0.90
   5  15   2    1.10    0.90
  -5  15  -2   -0.40    0.80
   5  15   2    0.40    0.80
   5  15   2    0.10    0.50
   5  15   2   -0.60    0.80
   5  15   2    0.30    0.50
   6 -15   2   14.60    2.20
   6  15   2   14.20    2.50
  -6  15  -2   16.70    2.90
   6  15   2   11.80    1.60
   6  15   2   14.20    1.40
   6  15   2   16.90    2.40
   7 -15   2   76.19    5.10
   7 -15   2   90.39    6.10
   7  15   2   76.19    5.20
  -7  15  -2   79.09    6.00
   7  15   2   74.09    5.20
   7  15   2   75.09    6.30
   7  15   2   71.29    4.20
   8 -15   2   89.49    6.70
   8 -15   2   93.19    6.10
   8  15   2   93.69    6.70
   8  15   2  100.09    6.50
   8  15   2   98.59    6.30
   9 -15   2   21.50    2.50
   9 -15   2   26.50    3.80
   9  15   2   23.90    3.10
   9  15   2   21.50    3.10
   9  15   2   22.30    3.00
   9  15   2   16.80    1.90
  10 -15   2   22.80    2.70
  10 -15   2   28.10    4.10
  10  15   2   22.50    3.50
  10  15   2   19.20    2.90
  10  15   2   23.20    2.00
  10  15   2   27.50    3.70
  11 -15   2   26.30    3.10
  11 -15   2   28.80    4.20
  11  15   2   22.20    3.40
  11  15   2   26.30    3.50
  11  15   2   22.10    3.40
  11  15   2   25.20    2.20
  12 -15   2    1.10    1.40
  12  15   2    2.80    1.50
  12  15   2    2.20    1.80
  12  15   2   -1.40    1.00
  12  15   2    0.80    1.10
  13 -15   2    1.10    1.50
  13 -15   2   -1.30    1.30
  13  15   2    1.60    1.80
  13  15   2   -0.60    1.20
  13  15   2    0.60    1.30
  13  15   2   -2.40    1.90
  14 -16  -2   20.20    3.40
  14 -16  -2   22.30    4.00
  14  16  -2   24.70    3.50
  14  16  -2   26.80    4.10
  13 -16  -2   25.70    3.70
  13 -16  -2   22.20    3.90
  13  16  -2   25.90    3.80
  13  16  -2   33.10    4.40
 -13  16   2   24.40    2.70
  12 -16  -2   27.80    4.20
  12 -16  -2   29.10    3.30
  12  16  -2   32.70    3.70
  12  16  -2   31.40    4.40
 -12  16   2   26.30    2.60
  11 -16  -2    7.80    1.70
  11 -16  -2    8.70    2.10
 -11  16   2   10.00    1.50
  11  16  -2    8.70    1.90
  11  16  -2    6.80    1.80
  11  16  -2    9.20    2.40
  10 -16  -2    0.10    0.80
  10 -16  -2    0.20    1.20
  10  16  -2    2.00    1.40
  10  16  -2    0.80    1.20
 -10  16   2    0.20    0.70
  10  16  -2    1.50    0.80
   9 -16  -2   31.40    4.10
   9 -16  -2   20.00    2.90
   9  16  -2   24.90    2.70
  -9  16   2   22.90    2.10
  -9  16   2   23.30    2.70
   8 -16  -2   92.39    6.80
   8 -16  -2   91.29    5.90
   8  16  -2   85.99    6.40
  -8  16   2   89.79    5.20
  -8  16   2   86.39    5.90
   8  16  -2   94.49    6.10
   8  16  -2   92.29    6.60
   7 -16  -2  112.09    6.90
   7 -16  -2  115.89    7.50
   7  16  -2  115.09    7.00
  -7  16   2  113.89    6.20
  -7  16   2  112.49    7.20
   7  16  -2  117.39    7.60
   7  16  -2  112.49    7.60
   6 -16  -2  106.89    6.70
   6 -16  -2   96.69    6.10
  -6  16   2   96.49    5.50
  -6  16   2  106.39    6.60
   6  16  -2  103.29    6.20
   6  16  -2   86.49    6.70
   6  16  -2  107.19    6.90
   5 -16  -2  107.59    6.50
  -5  16   2  114.49    6.10
  -5  16   2  113.39    7.10
   5  16  -2  111.19    7.40
   5  16  -2   98.29    6.90
   5  16  -2  116.19    6.50
   4 -16  -2    1.50    0.80
  -4  16   2    1.20    0.60
   4  16  -2    2.10    0.90
  -4  16   2    2.40    1.10
   4  16  -2    2.50    1.20
   3 -16  -2   47.30    3.40
   3  16  -2   48.40    4.20
   3  16  -2   52.99    3.40
  -3  16   2   46.70    3.10
  -3  16   2   48.00    3.90
  -2 -16   2    9.80    1.00
   2 -16  -2   15.70    2.00
   2  16  -2   11.40    2.40
  -2  16   2   12.50    2.20
   2  16  -2    8.70    1.10
   2  16  -2   14.30    1.70
  -2  16   2   10.10    1.40
   1 -16  -2    1.00    0.50
  -1 -16   2    2.00    0.60
   1  16  -2    0.70    0.60
   1  16  -2    1.60    0.70
   1  16  -2    1.60    0.90
  -1  16   2    0.70    0.60
  -1  16   2    1.00    0.80
   0 -16   2    0.00    0.50
   0 -16   2    0.40    0.50
   0  16  -2    0.40    0.50
   0  16   2    0.40    0.60
   0  16   2    0.70    0.80
   0  16  -2   -0.20    0.80
   1 -16   2    2.50    0.90
   1 -16   2    3.80    0.80
   1  16   2    2.90    0.70
   1  16   2    3.00    1.20
  -1  16  -2    1.50    1.00
  -1  16  -2    2.80    0.60
   1  16   2    4.10    1.10
   2 -16   2    2.40    0.80
   2 -16   2    1.90    0.50
   2  16   2    2.10    1.00
   2  16   2    0.60    0.70
   2  16   2    2.90    0.70
  -2  16  -2    2.60    0.50
  -2  16  -2    0.90    0.80
   3 -16   2    9.30    1.60
   3  16   2    6.20    1.20
  -3  16  -2    6.80    0.60
   3  16   2    4.80    1.60
   3  16   2    8.40    1.00
  -3  16  -2    8.30    2.10
   4 -16   2  103.49    5.80
   4  16   2  105.79    6.00
   4  16   2   89.49    4.90
   4  16   2   94.89    6.50
  -4  16  -2  101.89    7.00
   5 -16   2   87.89    5.40
   5  16   2   82.89    5.40
   5  16   2   86.89    6.10
  -5  16  -2   88.09    6.40
   6  16   2   58.29    4.20
   6  16   2   59.19    4.40
   6  16   2   52.89    5.20
  -6  16  -2   61.59    5.10
   7 -16   2   64.79    4.70
   7 -16   2   70.69    5.40
   7  16   2   70.79    5.00
  -7  16  -2   60.79    5.40
   7  16   2   70.09    5.30
   7  16   2   58.49    4.60
   8 -16   2    6.10    1.80
   8 -16   2    8.20    1.80
   8  16   2    5.30    1.50
  -8  16  -2    4.10    1.80
   8  16   2    6.20    1.70
   8  16   2    3.20    1.00
   8  16   2    5.50    1.80
   9 -16   2    0.10    1.10
   9 -16   2   -0.30    1.10
   9  16   2   -0.90    0.90
   9  16   2   -0.90    1.20
   9  16   2   -1.70    1.10
  10 -16   2   11.80    2.10
  10 -16   2   13.40    2.80
  10  16   2   10.30    2.40
  10  16   2    7.90    2.00
  11 -16   2   38.40    4.90
  11 -16   2   17.80    2.90
  11  16   2   24.70    3.40
  11  16   2   24.40    3.60
  11  16   2   19.70    3.10
  12 -16   2   30.50    3.50
  12 -16   2   32.30    4.60
  12  16   2   24.80    3.80
  12  16   2   40.90    4.20
  14 -17  -2    1.70    1.30
  14 -17  -2   -1.50    1.30
  14  17  -2    0.90    1.90
  14  17  -2    0.30    1.70
  13 -17  -2    2.30    1.50
  13  17  -2   -2.30    1.40
  13  17  -2    2.40    1.80
 -13  17   2   -1.20    1.20
  12 -17  -2   21.70    3.60
  12 -17  -2   26.70    3.10
  12  17  -2   28.40    4.00
  12  17  -2   19.40    3.20
  12  17  -2   20.10    3.50
 -12  17   2   21.80    2.40
  11 -17  -2   62.59    5.00
  11 -17  -2   60.49    5.50
  11  17  -2   58.09    5.40
  11  17  -2   62.39    5.50
  11  17  -2   72.19    5.30
 -11  17   2   60.69    4.00
  10 -17  -2   53.19    4.70
  10 -17  -2   50.79    4.30
 -10  17   2   55.09    3.50
 -10  17   2   48.20    4.30
  10  17  -2   54.59    4.40
  10  17  -2   51.69    4.80
  10  17  -2   58.39    5.10
   9 -17  -2   89.39    6.70
   9 -17  -2   90.89    6.10
   9  17  -2   85.19    6.50
   9  17  -2   94.79    6.80
   9  17  -2   96.49    6.30
  -9  17   2   87.49    5.20
  -9  17   2   88.69    6.10
   8 -17  -2   40.90    3.90
   8 -17  -2   39.30    3.60
  -8  17   2   39.30    3.70
  -8  17   2   36.30    2.80
   8  17  -2   37.70    3.90
   8  17  -2   44.90    3.70
   7 -17  -2    6.40    1.70
  -7  17   2    2.70    1.50
  -7  17   2    4.10    1.00
   7  17  -2    7.40    2.10
   7  17  -2    5.40    1.80
   6 -17  -2   33.50    3.50
   6 -17  -2   37.40    3.30
  -6  17   2   39.40    3.60
   6  17  -2   46.70    4.20
   6  17  -2   43.20    3.40
   6  17  -2   43.30    4.00
  -6  17   2   45.80    2.90
   5 -17  -2  125.69    7.20
  -5  17   2  124.79    7.80
   5  17  -2  121.09    7.10
   5  17  -2  121.59    7.80
  -5  17   2  123.69    6.60
   5  17  -2  120.89    8.20
   4 -17  -2   36.70    3.00
   4  17  -2   37.90    3.00
   4  17  -2   35.00    3.70
  -4  17   2   36.20    2.60
  -4  17   2   32.80    3.30
   3 -17  -2   16.40    2.10
   3  17  -2   12.80    2.40
  -3  17   2   13.30    1.70
  -3  17   2   18.80    2.90
   3  17  -2   18.00    1.80
   2 -17  -2    0.90    0.70
  -2 -17   2    3.00    0.70
   2  17  -2    1.80    0.60
  -2  17   2    2.30    0.70
   2  17  -2    1.60    1.00
   2  17  -2    2.00    0.70
  -2  17   2    4.30    1.40
  -1 -17   2    0.70    0.50
   1 -17  -2    0.20    0.60
   1  17  -2   -0.70    0.50
  -1  17   2    0.20    0.80
   1  17  -2    0.40    0.80
   1  17  -2   -0.80    0.40
  -1  17   2    0.40    0.70
   0 -17   2    3.30    0.90
   0  17  -2    3.60    1.40
   0  17  -2    3.00    0.90
   0  17   2    1.60    0.70
   0  17   2    1.00    1.00
   1 -17   2    7.60    1.30
   1 -17   2    8.50    1.20
   1  17   2    7.80    1.00
  -1  17  -2    8.90    1.10
   1  17   2    7.00    1.70
   1  17   2    5.30    1.10
  -1  17  -2    5.80    1.80
   2 -17   2   11.70    1.20
   2 -17   2   12.90    1.60
   2  17   2   13.10    2.30
  -2  17  -2   15.50    1.20
   2  17   2   15.30    2.00
   2  17   2   12.00    1.20
  -2  17  -2   14.30    2.60
   3 -17   2   24.20    2.30
  -3  17  -2   33.20    4.40
   3  17   2   27.50    3.00
   3  17   2   25.10    1.80
   3  17   2   30.00    2.50
  -3  17  -2   30.20    1.70
   4 -17   2   81.39    4.90
   4  17   2   72.49    4.90
  -4  17  -2   76.59    6.00
   4  17   2   81.39    5.80
   5 -17   2   52.89    3.70
   5  17   2   48.00    4.10
  -5  17  -2   47.10    4.50
   5  17   2   49.20    4.30
   6 -17   2    0.40    0.80
  -6  17  -2    1.90    1.20
   6  17   2    0.20    1.10
   6  17   2   -0.80    0.80
   6  17   2   -0.20    0.70
   7 -17   2   10.10    1.90
   7 -17   2   13.20    2.60
   7  17   2    9.80    2.20
   7  17   2   12.30    2.10
   7  17   2   11.30    2.30
  -7  17  -2   11.50    2.70
   8 -17   2   69.09    5.60
   8 -17   2   61.59    4.60
   8  17   2   63.39    5.40
   8  17   2   62.29    4.70
  -8  17  -2   59.89    6.00
   8  17   2   61.09    4.90
   9 -17   2   41.60    5.30
   9 -17   2   29.80    3.10
   9  17   2   38.90    4.10
   9  17   2   30.60    3.20
   9  17   2   37.90    3.70
  10 -17   2   26.20    4.00
  10 -17   2   21.30    3.10
  10  17   2   27.60    3.60
  10  17   2   21.90    3.10
  10  17   2   17.40    3.10
  11 -17   2   10.00    2.70
  11 -17   2    7.50    1.90
  11  17   2    7.30    1.90
  11  17   2   12.60    2.40
  11  17   2   10.10    2.20
  12 -17   2   -0.40    1.10
  12  17   2   -0.50    1.10
  12  17   2   -0.40    1.40
  12  17   2    0.70    1.70
  13 -18  -2   21.40    3.40
  13  18  -2   21.50    3.70
  13  18  -2   21.80    3.60
  12 -18  -2   35.90    3.80
  12 -18  -2   36.80    5.10
 -12  18   2   29.30    2.70
  12  18  -2   41.10    4.40
  12  18  -2   33.60    4.60
  12  18  -2   36.80    3.80
  11 -18  -2    8.10    2.30
  11 -18  -2    4.30    1.60
  11  18  -2    7.50    2.40
  11  18  -2    2.70    1.60
  11  18  -2    5.20    1.70
 -11  18   2    3.00    1.20
  10 -18  -2   10.60    2.40
  10 -18  -2    5.70    1.70
 -10  18   2    3.60    1.40
  10  18  -2    6.30    2.00
 -10  18   2    6.60    1.30
  10  18  -2    7.20    1.70
  10  18  -2    7.70    2.20
   9 -18  -2   26.60    3.80
   9 -18  -2   24.60    2.80
   9  18  -2   27.90    3.90
  -9  18   2   24.30    2.10
   9  18  -2   20.90    3.00
   9  18  -2   19.90    3.50
  -9  18   2   26.10    3.00
   8 -18  -2   61.29    5.20
   8 -18  -2   64.59    4.80
   8  18  -2   67.59    6.70
   8  18  -2   71.59    4.90
  -8  18   2   60.29    3.90
  -8  18   2   60.69    5.00
   8  18  -2   57.29    5.30
   7 -18  -2   68.79    4.80
   7 -18  -2   65.49    5.30
   7  18  -2   61.79    4.70
  -7  18   2   65.39    4.00
   7  18  -2   69.99    5.40
  -7  18   2   66.89    5.20
   6 -18  -2   18.00    2.40
  -6  18   2   20.20    3.10
   6  18  -2   15.80    2.30
  -6  18   2   12.70    1.70
   6  18  -2   15.90    2.80
   6  18  -2   16.00    2.80
   5 -18  -2    9.10    1.80
   5  18  -2    9.10    1.70
   5  18  -2   10.70    2.40
  -5  18   2   10.40    1.50
  -5  18   2   11.50    2.30
   4 -18  -2   -0.30    0.70
  -4  18   2    2.90    0.80
   4  18  -2    0.80    1.00
  -4  18   2    0.00    0.90
   4  18  -2    0.00    0.70
   3 -18  -2   85.59    5.20
   3  18  -2   78.39    5.00
   3  18  -2   79.69    6.10
  -3  18   2   83.19    4.80
  -3  18   2   83.19    5.90
   2 -18  -2    3.70    1.20
  -2 -18   2    3.80    0.70
   2  18  -2    3.20    1.00
   2  18  -2    4.90    1.70
  -2  18   2    4.20    1.50
   2  18  -2    2.50    0.70
  -2  18   2    2.80    0.90
   1 -18  -2    6.50    1.40
  -1 -18   2    7.00    1.10
   1  18  -2    7.30    1.30
   1  18  -2    6.40    1.90
   1  18  -2    5.60    1.10
  -1  18   2    5.50    1.70
  -1  18   2   10.20    1.50
   0 -18   2   -0.20    0.60
   0  18   2    0.10    0.60
   0  18   2   -1.10    0.80
   0  18  -2    0.60    0.40
   0  18  -2   -0.50    0.90
   1 -18   2   37.10    2.50
   1 -18   2   32.60    2.50
  -1  18  -2   36.70    2.40
   1  18   2   38.30    2.80
   1  18   2   33.60    2.50
  -1  18  -2   32.90    3.60
   1  18   2   34.60    3.40
   2 -18   2  107.89    5.90
  -2  18  -2  105.69    7.40
  -2  18  -2  114.39    5.40
   2  18   2   93.49    6.00
   2  18   2   98.59    7.00
   2  18   2  100.59    5.30
   3 -18   2    9.70    1.70
  -3  18  -2   10.50    0.90
   3  18   2   11.30    2.30
   3  18   2   11.20    1.80
  -3  18  -2   11.80    2.60
   4 -18   2   -0.40    0.80
   4  18   2   -0.80    0.70
   4  18   2    0.50    1.00
  -4  18  -2    4.00    1.60
   5 -18   2    0.00    0.80
   5  18   2    0.30    0.90
   5  18   2   -0.80    0.80
  -5  18  -2    0.20    1.10
   6 -18   2   60.59    4.20
   6  18   2   55.99    4.30
  -6  18  -2   54.79    5.00
   6  18   2   60.89    5.20
   7 -18   2   72.19    5.80
   7 -18   2   66.59    4.90
   7  18   2   73.29    5.80
   7  18   2   72.89    5.30
   7  18   2   69.49    5.00
  -7  18  -2   74.39    6.10
   8 -18   2   20.00    3.40
   8 -18   2   20.90    3.00
   8  18   2   14.60    3.00
   8  18   2   24.30    2.60
  -8  18  -2   24.30    3.90
   8  18   2   21.00    3.10
   9 -18   2    2.40    1.50
   9 -18   2    3.40    1.40
   9  18   2    4.30    1.90
   9  18   2    5.00    1.60
   9  18   2    5.30    1.80
  10 -18   2    3.60    1.50
  10 -18   2   13.40    3.00
  10  18   2    6.20    2.10
  10  18   2    9.00    2.20
  10  18   2   10.40    2.30
  11 -18   2   19.60    3.70
  11  18   2   25.70    5.30
  11  18   2   16.60    3.30
  11  18   2   28.40    3.60
  12 -18   2   22.00    4.00
  12 -18   2   18.10    2.80
  12  18   2   23.50    3.60
  12  18   2   24.90    3.40
  13 -19  -2    1.30    1.40
  13 -19  -2   -0.90    1.00
  13  19  -2   -0.80    1.30
  13  19  -2   -0.60    1.40
  12 -19  -2    2.60    1.30
  12 -19  -2    0.10    1.40
  12  19  -2    3.20    1.30
  12  19  -2    0.60    1.90
  12  19  -2    0.80    1.40
 -12  19   2   -1.50    1.00
  11 -19  -2    9.00    2.30
  11 -19  -2    6.00    1.80
  11  19  -2    7.50    2.20
  11  19  -2    6.60    2.00
 -11  19   2   10.10    1.50
  11  19  -2    9.80    2.70
  10 -19  -2    4.10    1.50
  10 -19  -2    7.40    2.20
  10  19  -2    6.10    2.00
  10  19  -2    5.90    2.10
 -10  19   2    8.60    2.00
 -10  19   2    4.80    1.20
  10  19  -2    4.70    1.50
   9 -19  -2   17.20    2.90
   9 -19  -2   15.80    2.90
  -9  19   2   21.60    1.90
   9  19  -2   15.90    3.00
  -9  19   2   12.60    2.50
   9  19  -2   20.90    3.40
   9  19  -2   13.10    2.30
   8 -19  -2    4.10    1.40
   8 -19  -2    7.10    1.90
   8  19  -2    3.60    1.60
   8  19  -2    2.20    1.60
  -8  19   2    4.80    1.70
   8  19  -2    2.60    1.30
  -8  19   2    3.10    0.90
   7 -19  -2   32.10    3.50
   7 -19  -2   31.90    3.10
   7  19  -2   32.20    3.10
  -7  19   2   30.40    4.00
  -7  19   2   31.50    2.40
   7  19  -2   39.70    4.10
   6 -19  -2    3.20    1.10
  -6  19   2    2.10    0.90
  -6  19   2    1.40    1.20
   6  19  -2    0.30    1.50
   5 -19  -2   44.50    3.60
   5  19  -2   42.90    3.50
  -5  19   2   44.80    3.10
   5  19  -2   47.90    4.60
  -5  19   2   49.50    4.30
   4 -19  -2   16.10    2.30
   4  19  -2   15.20    2.90
   4  19  -2   14.70    2.20
  -4  19   2   15.60    1.70
  -4  19   2   16.00    2.70
   3 -19  -2   14.80    2.10
  -3  19   2   11.60    2.50
   3  19  -2   13.70    2.70
   3  19  -2   10.50    1.70
  -3  19   2   10.90    1.60
   2 -19  -2   25.10    2.30
  -2 -19   2   23.80    1.80
   2  19  -2   21.90    3.40
  -2  19   2   26.30    2.90
   2  19  -2   21.60    2.10
  -2  19   2   24.40    2.10
   1 -19  -2   17.60    2.30
  -1  19   2   18.90    1.90
  -1  19   2   17.00    3.00
   1  19  -2   15.50    2.80
   1  19  -2   14.80    1.70
   1  19  -2   17.20    1.80
   0 -19   2   76.09    4.30
   0  19  -2   67.29    5.60
   0  19   2   65.09    4.40
   0  19   2   77.69    5.70
   0  19  -2   71.09    4.20
   1 -19   2   14.70    1.80
   1  19   2   18.50    2.90
   1  19   2   18.20    1.90
  -1  19  -2   20.20    3.30
  -1  19  -2   20.50    1.60
   2 -19   2    0.50    0.70
   2 -19   2   -1.20    0.60
   2  19   2    0.50    0.70
  -2  19  -2    0.50    0.50
   2  19   2    0.40    1.00
   2  19   2   -0.70    0.70
  -2  19  -2   -0.10    1.00
   3 -19   2   23.10    2.20
   3  19   2   19.70    2.30
  -3  19  -2   24.70    1.60
  -3  19  -2   24.50    3.70
   3  19   2   24.50    3.50
   4 -19   2   26.30    2.60
   4  19   2   34.00    3.60
  -4  19  -2   31.50    4.30
   4  19   2   28.20    2.70
   5  19   2   -0.40    0.60
  -5  19  -2    0.90    1.10
   5  19   2    0.50    0.80
   6 -19   2   15.70    2.30
   6  19   2   22.30    3.40
   6  19   2   17.70    2.50
  -6  19  -2   18.60    3.70
   7 -19   2    2.20    1.10
   7 -19   2    0.90    0.90
   7  19   2    2.40    1.60
  -7  19  -2    2.20    1.40
   7  19   2    1.70    1.00
   8 -19   2    7.20    1.70
   8 -19   2    8.00    2.40
  -8  19  -2    9.70    2.60
   8  19   2    8.30    2.10
   8  19   2    6.20    1.80
   8  19   2   10.00    2.10
   9 -19   2   13.90    2.50
   9 -19   2   17.10    3.20
   9  19   2   14.60    2.80
   9  19   2   16.40    2.90
   9  19   2   19.10    3.10
  10 -19   2    7.50    1.80
  10 -19   2    9.80    2.50
  10  19   2   11.50    2.80
  10  19   2    8.30    2.00
  10  19   2   13.20    2.40
  11 -19   2    7.70    3.10
  11 -19   2    0.80    1.50
  11  19   2    3.40    1.60
  11  19   2    4.90    1.90
  11  19   2    4.10    1.90
  13 -20  -2    0.90    1.10
  13 -20  -2    0.40    1.70
  13  20  -2    0.40    1.70
  13  20  -2    3.40    1.80
  12 -20  -2    3.60    1.90
 -12  20   2   -2.30    1.90
  12  20  -2    5.40    2.10
  12  20  -2    3.00    1.60
  12  20  -2    3.70    1.90
  11 -20  -2    2.50    1.30
  11 -20  -2    2.00    1.20
  11  20  -2    1.70    1.60
  11  20  -2    0.90    1.30
  11  20  -2    0.80    1.50
 -11  20   2   -0.30    1.00
  10 -20  -2   -0.60    0.80
  10 -20  -2    0.80    1.20
  10  20  -2    0.40    1.40
  10  20  -2    2.20    1.40
 -10  20   2   -1.40    0.80
  10  20  -2    2.20    1.90
 -10  20   2   -2.50    1.40
   9 -20  -2    8.90    2.00
   9 -20  -2    9.00    2.20
  -9  20   2    8.30    1.40
   9  20  -2    8.50    2.40
  -9  20   2   11.80    2.50
   9  20  -2    6.90    1.80
   9  20  -2   12.50    2.80
   8 -20  -2    2.70    1.70
   8 -20  -2    0.50    1.00
   8  20  -2    0.10    0.90
  -8  20   2    0.90    0.80
   8  20  -2    1.40    1.40
   8  20  -2    1.50    1.50
  -8  20   2    1.80    1.50
   7 -20  -2    0.20    0.80
   7 -20  -2   -0.30    1.00
   7  20  -2    1.00    1.20
  -7  20   2    1.20    1.40
  -7  20   2    0.00    0.60
   7  20  -2   -0.60    0.70
   7  20  -2    1.80    1.30
   6 -20  -2    8.00    1.70
  -6  20   2    7.90    1.40
  -6  20   2    6.10    2.10
   6  20  -2    7.90    2.30
   6  20  -2    8.70    1.80
   5 -20  -2   12.00    2.30
   5  20  -2   15.80    2.40
  -5  20   2   14.00    1.50
  -5  20   2   13.50    2.70
   5  20  -2   11.20    2.50
   4 -20  -2   56.59    4.10
  -4  20   2   52.49    3.50
   4  20  -2   53.49    4.00
  -4  20   2   56.09    4.90
   3 -20  -2   61.29    4.40
  -3  20   2   64.59    5.20
   3  20  -2   68.89    5.50
   3  20  -2   65.89    4.30
  -3  20   2   62.49    4.00
   2 -20  -2   55.39    3.90
  -2 -20   2   57.29    3.20
  -2  20   2   51.79    3.60
   2  20  -2   54.89    5.00
  -2  20   2   48.80    4.60
   2  20  -2   52.69    3.60
   1 -20  -2    0.80    0.70
  -1 -20   2    1.50    0.60
  -1  20   2    0.30    1.00
   1  20  -2    0.60    0.80
  -1  20   2    0.50    0.80
   1  20  -2   -0.10    1.10
   0 -20   2   26.10    2.20
   0  20   2   25.80    3.90
   0  20  -2   29.30    2.20
   0  20   2   26.90    2.40
   0  20  -2   26.90    4.00
   1 -20   2   12.70    1.70
  -1  20  -2    7.10    1.90
   1  20   2    3.00    1.40
   1  20   2    8.00    1.60
  -1  20  -2    9.90    1.30
   2 -20   2   15.20    1.70
   2 -20   2   13.80    1.50
   2  20   2   11.20    1.90
  -2  20  -2   17.90    1.40
  -2  20  -2   19.20    3.40
   2  20   2   13.20    1.40
   2  20   2   11.50    2.50
   3 -20   2   89.69    5.40
  -3  20  -2   86.49    4.50
  -3  20  -2   93.99    7.00
   3  20   2   83.39    6.50
   4 -20   2    3.60    1.20
   4  20   2    2.50    1.50
  -4  20  -2    3.50    1.90
   4  20   2    2.80    1.30
   5 -20   2    1.90    1.10
   5  20   2    1.60    1.40
   5  20   2    2.00    1.10
   6 -20   2    1.40    1.10
  -6  20  -2    0.40    1.40
   6  20   2    1.80    1.10
   6  20   2    1.10    1.40
   7 -20   2    3.00    1.50
   7 -20   2    0.60    1.00
   7  20   2    2.50    1.30
   7  20   2    1.00    1.40
  -7  20  -2    0.40    1.60
   8 -20   2    1.60    1.20
   8 -20   2    4.30    1.70
   8  20   2    1.80    1.30
  -8  20  -2    4.80    2.30
   9 -20   2    1.30    1.20
   9 -20   2    1.50    1.30
   9  20   2    2.30    1.40
   9  20   2    1.70    1.20
   9  20   2   -0.90    1.30
  10 -20   2    0.10    1.20
  10 -20   2    0.40    1.40
  10  20   2   -1.90    1.10
  10  20   2   -2.90    1.10
  10  20   2    0.10    1.50
  11 -20   2    4.10    2.50
  11 -20   2    6.40    2.10
  11  20   2    8.00    2.30
  11  20   2    8.70    2.20
  12 -21  -2    7.70    2.20
  12 -21  -2   13.50    3.00
  12  21  -2    8.40    2.20
  12  21  -2   10.20    2.80
  12  21  -2    9.90    2.70
  11 -21  -2   34.30    4.70
  11 -21  -2   37.10    3.90
  11  21  -2   31.40    4.60
  11  21  -2   33.00    3.70
  11  21  -2   37.50    5.00
  10 -21  -2   10.90    2.50
  10 -21  -2    9.20    2.20
  10  21  -2   10.10    2.50
  10  21  -2    8.20    2.50
 -10  21   2   10.40    2.40
 -10  21   2    8.40    1.40
  10  21  -2   13.00    2.40
   9 -21  -2   16.60    2.70
   9 -21  -2   13.30    3.00
  -9  21   2   15.50    2.70
  -9  21   2   15.00    1.80
   9  21  -2   16.00    3.20
   9  21  -2   15.70    2.60
   9  21  -2   17.30    3.50
   8 -21  -2   14.90    2.50
   8 -21  -2   18.40    3.30
   8  21  -2   12.70    2.80
   8  21  -2   16.30    2.70
  -8  21   2   15.50    2.70
  -8  21   2   11.00    1.60
   8  21  -2   18.10    3.40
   7 -21  -2    1.60    1.30
   7 -21  -2   -0.20    0.70
  -7  21   2    0.60    1.30
   7  21  -2    0.60    0.80
   7  21  -2    0.90    1.20
  -7  21   2   -1.30    0.60
   6 -21  -2   -1.00    1.00
  -6  21   2   -0.70    0.60
  -6  21   2    2.30    1.70
   6  21  -2    1.50    1.10
   6  21  -2    0.10    0.90
   5 -21  -2    0.50    0.90
  -5  21   2    0.60    0.70
  -5  21   2   -0.70    0.90
   5  21  -2    0.90    1.40
   5  21  -2   -0.20    1.30
   4 -21  -2    8.10    1.80
  -4  21   2   11.70    2.70
   4  21  -2   10.40    1.90
   4  21  -2    7.40    2.10
  -4  21   2   10.00    1.40
   3 -21  -2    7.70    1.70
  -3  21   2    9.30    1.50
   3  21  -2    9.50    2.50
   3  21  -2    9.80    1.70
  -3  21   2   11.60    2.50
  -2 -21   2    2.00    0.70
   2 -21  -2    1.30    0.90
   2  21  -2    1.50    0.90
   2  21  -2    1.20    0.70
  -2  21   2    1.60    1.40
   2  21  -2    1.50    2.20
  -2  21   2    1.80    0.90
   1 -21  -2   81.79    5.10
  -1 -21   2   81.29    4.60
  -1  21   2   71.59    4.80
  -1  21   2   86.89    6.40
   1  21  -2   78.69    4.80
   0 -21   2   38.10    2.80
   0  21   2   38.90    3.00
   0  21  -2   35.00    5.50
   0  21   2   35.70    3.90
   0  21  -2   39.80    2.80
   1 -21   2    0.90    0.80
  -1  21  -2    3.30    1.70
   1  21   2    2.00    0.90
  -1  21  -2    0.60    0.60
   2 -21   2    0.00    0.70
   2 -21   2    0.40    0.80
   2  21   2   -0.40    0.90
   2  21   2    1.50    1.00
   2  21   2   -0.30    0.90
   3 -21   2    3.00    1.10
  -3  21  -2    1.20    1.70
  -3  21  -2    3.20    0.70
   3  21   2    2.80    1.10
   3  21   2    2.30    1.40
   4 -21   2    6.80    1.60
   4  21   2    5.60    1.60
  -4  21  -2    8.40    2.30
   4  21   2    7.30    2.00
   5 -21   2    2.30    1.20
   5  21   2   -0.70    0.80
  -5  21  -2    0.30    1.40
   5  21   2    1.30    1.20
   6 -21   2   -0.80    0.90
   6  21   2    1.20    1.20
   6  21   2   -1.40    0.60
  -6  21  -2    6.00    2.40
   7 -21   2   21.80    3.40
   7 -21   2   15.90    2.50
   7  21   2   15.40    3.10
   7  21   2   18.30    2.60
  -7  21  -2   21.90    3.90
   8 -21   2    9.40    2.20
   8 -21   2   14.70    2.70
  -8  21  -2   15.90    3.50
   8  21   2   10.50    2.20
   8  21   2   13.70    3.00
   9 -21   2   16.10    3.40
   9 -21   2    7.70    1.90
   9  21   2   10.50    2.20
  -9  21  -2   13.40    2.90
   9  21   2   12.70    2.80
  10 -21   2    9.60    2.90
  10  21   2   15.10    3.00
  10  21   2    9.00    2.10
  11 -21   2    9.80    2.80
  11 -21   2    7.40    2.00
  11  21   2    7.70    2.10
  11  21   2    9.80    2.50
  11  21   2    8.60    2.20
  12 -22  -2   47.70    4.60
  12 -22  -2   46.40    5.10
  12  22  -2   48.00    5.20
  12  22  -2   42.80    4.40
  12  22  -2   38.20    5.60
  11 -22  -2    9.80    2.90
  11 -22  -2   15.10    3.30
  11  22  -2    9.30    2.80
  11  22  -2    8.50    2.30
  10 -22  -2    6.10    2.10
  10 -22  -2    5.50    1.80
  10  22  -2    7.20    2.30
  10  22  -2    1.60    1.70
 -10  22   2    6.30    1.10
  10  22  -2    6.40    1.90
   9 -22  -2    0.80    1.30
   9 -22  -2    4.90    1.60
   9  22  -2    0.40    0.90
   9  22  -2    4.90    2.20
  -9  22   2    1.10    0.90
  -9  22   2    5.20    1.80
   9  22  -2    3.50    2.10
   8 -22  -2   76.09    6.10
   8 -22  -2   60.49    5.00
   8  22  -2   72.39    5.40
  -8  22   2   68.09    5.70
  -8  22   2   70.99    4.20
   8  22  -2   66.79    6.20
   7 -22  -2   65.59    5.60
   7 -22  -2   63.59    5.00
   7  22  -2   69.89    5.10
  -7  22   2   67.09    4.10
   7  22  -2   64.29    6.00
  -7  22   2   64.09    5.60
   6 -22  -2   33.60    3.40
   6  22  -2   40.20    3.50
  -6  22   2   35.50    4.20
   6  22  -2   35.70    5.20
  -6  22   2   39.20    2.80
   5 -22  -2   28.00    3.20
  -5  22   2   38.10    4.10
   5  22  -2   30.80    3.10
   5  22  -2   31.60    4.90
  -5  22   2   31.40    2.50
   4 -22  -2   34.50    3.30
   4  22  -2   45.50    3.50
   4  22  -2   41.00    4.40
  -4  22   2   39.90    4.20
  -4  22   2   44.40    3.00
   3 -22  -2   12.50    2.10
   3  22  -2   15.40    2.20
   3  22  -2   13.70    2.90
  -3  22   2   13.50    1.90
  -3  22   2   14.00    2.90
  -2 -22   2   21.80    1.80
   2 -22  -2   23.40    2.30
  -2  22   2   24.60    2.20
   2  22  -2   16.40    1.80
   2  22  -2   17.50    3.50
  -2  22   2   25.50    3.80
   2  22  -2   24.30    2.20
   1 -22  -2    4.50    1.40
  -1 -22   2    2.90    0.90
  -1  22   2    2.40    0.90
   1  22  -2    6.40    1.30
   1  22  -2    3.70    1.80
   0 -22   2    3.90    1.10
   0  22  -2    4.90    1.10
   0  22  -2    4.40    1.80
   0  22   2    4.30    1.20
   0  22   2    2.10    1.40
   1 -22   2    0.10    0.70
   1  22   2    1.40    1.00
  -1  22  -2    1.00    0.70
   1  22   2   -0.10    0.90
  -1  22  -2   -0.40    0.90
   2 -22   2    2.10    0.90
   2  22   2    2.60    1.10
   2  22   2   -2.70    1.80
  -2  22  -2    2.50    0.70
   2  22   2    3.60    1.50
  -2  22  -2   -0.10    1.30
   3 -22   2   43.00    3.40
   3  22   2   41.80    4.40
   3  22   2   43.40    3.50
  -3  22  -2   44.10    2.60
  -3  22  -2   46.60    4.90
   4 -22   2   46.50    3.90
   4  22   2   55.49    4.10
   4  22   2   60.79    5.30
  -4  22  -2   56.49    5.50
   5 -22   2   41.50    3.60
   5  22   2   43.10    3.70
  -5  22  -2   44.40    4.90
   5  22   2   51.79    4.80
   6 -22   2   35.40    3.20
  -6  22  -2   31.60    4.70
   6  22   2   31.90    3.20
   6  22   2   28.40    4.20
   7 -22   2   31.50    3.10
   7 -22   2   28.90    4.20
   7  22   2   28.00    3.10
   7  22   2   28.90    4.30
  -7  22  -2   35.30    4.90
   8 -22   2    0.00    1.30
   8 -22   2    1.80    1.20
   8  22   2    2.10    1.50
   8  22   2    0.20    1.20
  -8  22  -2    1.80    1.80
   9 -22   2    1.40    1.50
   9 -22   2    1.00    1.20
   9  22   2    1.30    1.60
  -9  22  -2    0.10    1.70
   9  22   2    1.80    1.20
  10 -22   2   10.90    2.80
  10 -22   2    8.30    2.10
  10  22   2   12.00    2.60
  10  22   2    7.80    3.90
  11 -23  -2   73.29    5.90
  11 -23  -2   84.19    6.90
  11  23  -2   64.59    5.50
  11  23  -2   75.99    6.50
 -11  23   2   62.49    5.80
  11  23  -2   63.39    6.30
  10 -23  -2   85.09    6.80
  10 -23  -2   62.99    5.50
  10  23  -2   78.39    5.80
  10  23  -2   74.69    6.20
 -10  23   2   66.59    6.10
  10  23  -2   65.19    6.40
   9 -23  -2   50.09    4.40
   9 -23  -2   63.09    5.50
   9  23  -2   40.50    4.80
  -9  23   2   54.99    5.10
   9  23  -2   51.89    4.40
  -9  23   2   47.20    3.20
   8 -23  -2   28.20    4.10
   8 -23  -2   26.60    3.10
  -8  23   2   24.50    4.00
   8  23  -2   19.90    4.00
  -8  23   2   26.20    2.30
   8  23  -2   27.40    3.10
   7 -23  -2   14.50    2.70
   7 -23  -2   11.50    2.70
  -7  23   2   11.80    3.20
   7  23  -2   10.30    2.20
   7  23  -2    9.20    2.60
  -7  23   2   12.90    1.70
   6 -23  -2   17.40    2.80
  -6  23   2   15.60    1.90
   6  23  -2   13.40    3.20
   6  23  -2   20.30    2.80
   5 -23  -2   32.80    3.40
   5  23  -2   33.40    4.90
  -5  23   2   37.80    2.80
   5  23  -2   40.80    3.50
   4 -23  -2   76.29    5.30
   4  23  -2   69.49    6.20
   4  23  -2   83.09    5.40
  -4  23   2   71.29    4.50
  -4  23   2   68.89    7.50
   3 -23  -2   54.89    4.30
   3  23  -2   57.79    4.10
   3  23  -2   55.99    5.50
  -3  23   2   61.19    5.60
  -3  23   2   62.09    3.90
  -2 -23   2    7.10    1.10
   2 -23  -2    7.90    1.60
  -2  23   2    9.10    2.40
  -2  23   2    8.20    1.50
   2  23  -2    8.10    2.50
   2  23  -2    8.90    1.40
   2  23  -2    6.90    1.40
  -1 -23   2   -0.70    0.60
   1  23  -2   -1.20    1.20
  -1  23   2    2.00    0.90
  -1  23   2    0.30    1.00
   1  23  -2    0.20    0.70
   0 -23   2    1.40    0.80
   0  23   2    0.70    1.30
   0  23  -2    1.90    0.80
   0  23  -2   -0.70    1.30
   0  23   2    0.90    0.90
   1 -23   2   15.20    2.10
  -1  23  -2   11.80    2.90
   1  23   2   15.60    3.20
  -1  23  -2   13.60    1.50
   1  23   2   12.90    2.00
   2 -23   2    7.30    1.50
   2  23   2    6.30    1.80
  -2  23  -2    6.60    1.10
   2  23   2    8.70    1.60
  -2  23  -2   10.00    2.80
   3 -23   2   55.09    4.00
   3  23   2   56.39    5.40
   3  23   2   48.50    4.10
  -3  23  -2   62.09    3.30
  -3  23  -2   65.09    5.80
   4 -23   2   18.40    2.60
   4  23   2   20.20    3.60
  -4  23  -2   15.50    3.30
   4  23   2   16.50    2.40
   5 -23   2    2.40    1.30
   5  23   2    5.10    1.40
   5  23   2    1.70    1.50
  -5  23  -2    5.70    2.10
   6 -23   2   -1.10    0.90
   6  23   2    2.20    1.20
   6  23   2    3.70    1.80
  -6  23  -2    1.30    1.50
   7 -23   2   28.90    4.40
   7 -23   2   25.70    2.90
  -7  23  -2   29.70    4.70
   7  23   2   17.10    3.50
   7  23   2   32.60    3.20
   8 -23   2   62.79    5.50
   8 -23   2   44.20    4.10
  -8  23  -2   48.00    6.20
   8  23   2   44.10    5.00
   8  23   2   45.00    4.30
   9 -23   2   56.29    5.60
   9  23   2   52.19    4.70
  -9  23  -2   50.79    5.40
   9  23   2   62.69    7.00
  10 -23   2   29.60    4.80
  10 -23   2   43.40    4.20
  10  23   2   45.20    4.70
  10  23   2   35.90    3.90
  11 -24  -2    5.70    2.00
  11 -24  -2    5.50    2.00
  11  24  -2    4.40    1.60
  11  24  -2   13.50    4.90
 -11  24   2    5.60    2.60
  10 -24  -2    5.70    1.90
 -10  24   2    6.10    2.30
  10  24  -2    7.80    2.70
   9 -24  -2    0.60    1.30
   9 -24  -2    2.00    1.30
  -9  24   2    2.80    1.90
  -9  24   2    0.60    1.00
   9  24  -2    2.00    1.20
   9  24  -2    1.40    1.60
   8 -24  -2   42.30    4.50
   8 -24  -2   35.80    3.80
   8  24  -2   41.70    4.90
   8  24  -2   42.60    4.00
  -8  24   2   40.80    4.50
  -8  24   2   39.40    2.90
   7 -24  -2   55.09    4.80
   7 -24  -2   67.79    5.80
   7  24  -2   64.89    6.00
   7  24  -2   59.39    4.90
  -7  24   2   51.29    5.30
  -7  24   2   67.19    3.90
   6 -24  -2   11.00    2.20
  -6  24   2   12.50    2.90
  -6  24   2   12.10    1.70
   6  24  -2   11.80    2.40
   6  24  -2    8.40    2.40
   5 -24  -2   24.40    2.90
   5  24  -2   24.00    2.70
  -5  24   2   23.00    2.10
  -5  24   2   28.20    4.30
   5  24  -2   21.30    3.80
   4 -24  -2    6.30    2.20
  -4  24   2    8.30    1.40
   4  24  -2    5.40    2.00
   4  24  -2    4.30    1.50
  -4  24   2    7.50    2.20
   3 -24  -2   20.80    2.80
   3  24  -2   17.70    3.60
  -3  24   2   20.20    3.80
  -3  24   2   19.50    2.00
   3  24  -2   20.50    2.60
   2 -24  -2    7.90    1.70
  -2  24   2    8.20    2.50
   2  24  -2    5.10    1.80
  -2  24   2    9.70    1.70
   2  24  -2    8.80    1.60
  -1 -24   2   15.30    1.80
  -1  24   2   18.00    2.30
   1  24  -2   16.40    3.30
  -1  24   2   19.30    3.50
   1  24  -2   19.70    2.00
   0 -24   2   25.90    2.20
   0  24   2   29.50    4.10
   0  24  -2   19.60    3.90
   0  24   2   24.20    4.00
   0  24  -2   23.20    2.20
   1 -24   2    2.10    1.10
  -1  24  -2    0.00    1.20
   1  24   2    1.50    1.00
   1  24   2    1.50    1.60
  -1  24  -2    0.60    0.70
   2 -24   2   20.50    2.20
   2  24   2   22.90    4.10
  -2  24  -2   23.00    1.90
   2  24   2   28.10    2.60
  -2  24  -2   17.70    3.60
  -3  24  -2    4.70    2.30
  -3  24  -2    8.10    1.00
   3  24   2    4.90    1.40
   3  24   2    7.80    2.30
   4 -24   2   20.30    2.40
  -4  24  -2   20.10    3.90
   4  24   2   14.80    2.30
   4  24   2   16.30    3.30
   5 -24   2    2.90    1.10
  -5  24  -2    0.80    1.60
   5  24   2    0.30    1.10
   5  24   2    0.70    1.60
   6 -24   2   30.20    3.10
   6  24   2   29.00    4.30
  -6  24  -2   27.60    4.50
   6  24   2   28.40    3.00
   7 -24   2   50.39    4.90
   7 -24   2   42.20    4.00
   7  24   2   45.90    4.10
  -7  24  -2   51.79    5.40
   7  24   2   53.99    5.50
   8 -24   2    3.30    1.50
   8 -24   2    1.40    1.30
   8  24   2   -0.20    1.50
  -8  24  -2   -0.80    1.90
   9 -24   2    0.50    1.30
   9 -24   2    0.50    1.20
  -9  24  -2    0.60    1.90
   9  24   2    0.80    1.30
   9  24   2    1.00    1.60
  10 -25  -2    3.50    1.70
  10 -25  -2    3.00    2.00
  10  25  -2    2.00    1.30
 -10  25   2    1.40    2.20
   9 -25  -2   21.50    3.50
   9 -25  -2   15.30    3.20
  -9  25   2   19.70    3.50
   9  25  -2   20.50    3.20
   9  25  -2   20.70    4.00
   8 -25  -2   30.10    3.30
   8 -25  -2   24.60    4.00
  -8  25   2   28.40    4.20
   8  25  -2   27.90    4.70
   8  25  -2   20.20    3.10
  -8  25   2   24.30    2.20
   7 -25  -2    7.00    2.10
   7 -25  -2    8.80    2.00
  -7  25   2    8.80    1.50
  -7  25   2    7.90    2.10
   7  25  -2    6.40    2.40
   7  25  -2    0.70    1.80
   6 -25  -2   10.30    2.40
   6  25  -2    9.80    2.20
  -6  25   2   14.90    1.80
  -6  25   2   15.90    3.50
   6  25  -2   14.90    3.20
   5 -25  -2    1.70    1.00
   5  25  -2    0.60    1.30
   5  25  -2   -0.40    1.00
  -5  25   2    2.50    1.80
  -5  25   2    0.30    0.80
   4 -25  -2    8.20    1.90
   4  25  -2    5.40    1.60
   4  25  -2    7.00    2.20
  -4  25   2    7.80    1.30
  -4  25   2    6.60    2.20
   3 -25  -2    1.70    1.00
  -3  25   2    4.20    2.10
   3  25  -2    1.80    1.10
   3  25  -2    3.30    1.90
  -3  25   2    3.90    0.90
   2 -25  -2    0.80    1.10
   2  25  -2    0.10    0.80
   2  25  -2    0.70    1.40
  -2  25   2    0.50    0.90
  -2  25   2    0.70    1.20
  -1 -25   2    3.00    1.10
   1  25  -2    4.10    1.20
   1  25  -2    4.60    1.80
  -1  25   2    1.90    1.70
   0 -25   2    0.40    0.80
   0  25  -2   -0.50    1.10
   0  25  -2    1.00    0.70
   0  25   2    0.30    0.80
   0  25   2    0.10    1.30
   1 -25   2   14.00    2.10
  -1  25  -2   14.60    1.80
   1  25   2   10.90    3.00
  -1  25  -2   10.70    3.00
   1  25   2   15.00    2.20
   2 -25   2    7.70    1.70
  -2  25  -2    8.60    1.30
  -2  25  -2    7.50    2.70
   2  25   2    6.50    1.90
   2  25   2    6.50    1.60
   3 -25   2   12.40    2.20
  -3  25  -2   14.50    3.20
   3  25   2   15.00    2.30
   3  25   2   13.30    2.70
   4 -25   2   -0.60    0.90
  -4  25  -2    1.80    1.80
   4  25   2    0.80    1.20
   4  25   2    1.80    1.00
   5 -25   2    0.90    1.00
  -5  25  -2   -1.80    1.60
   5  25   2    1.30    0.90
   5  25   2   -0.80    1.30
   6 -25   2    5.70    1.60
   6  25   2    5.20    2.10
  -6  25  -2    6.20    2.30
   6  25   2    6.00    1.50
   7 -25   2   11.60    2.40
   7 -25   2   11.80    2.90
  -7  25  -2   11.20    2.80
   7  25   2    6.40    2.30
   7  25   2    8.70    2.00
   8 -25   2   15.20    2.90
   8 -25   2   31.70    4.70
   8  25   2   22.40    3.20
   8  25   2   22.50    4.30
  -8  25  -2   23.60    4.20
   9 -26  -2    8.20    2.40
   9 -26  -2    7.50    2.10
  -9  26   2    2.90    2.10
   9  26  -2    3.10    2.40
   8 -26  -2    6.30    2.10
   8 -26  -2    6.00    1.70
  -8  26   2    2.50    2.10
   8  26  -2    2.50    2.00
   8  26  -2    4.00    1.80
  -8  26   2   -0.90    0.90
   7 -26  -2   10.40    2.30
   7 -26  -2    7.50    2.40
  -7  26   2    6.70    1.30
   7  26  -2    3.90    2.20
  -7  26   2    8.30    2.50
   7  26  -2    5.70    1.80
   6 -26  -2   16.60    2.70
   6  26  -2   10.40    3.00
  -6  26   2   13.70    3.40
  -6  26   2   11.80    1.70
   6  26  -2   10.90    2.20
   5 -26  -2    2.30    1.20
   5  26  -2    0.40    1.10
  -5  26   2    1.70    0.90
  -5  26   2    2.10    1.90
   5  26  -2    1.00    1.70
   4 -26  -2    0.00    1.00
   4  26  -2    1.70    1.20
  -4  26   2    1.90    0.90
   4  26  -2    1.70    1.50
  -4  26   2   -1.80    1.50
   3  26  -2   16.10    2.40
   3  26  -2   14.30    3.10
  -3  26   2   17.90    1.90
  -3  26   2   13.80    3.00
   2 -26  -2    1.70    1.30
  -2  26   2    2.90    1.90
   2  26  -2    3.90    1.40
   2  26  -2    9.20    2.50
  -2  26   2    1.50    1.50
  -1 -26   2   11.70    1.70
   1  26  -2    9.40    2.50
  -1  26   2   13.40    2.90
   1  26  -2   12.90    1.90
  -1  26   2   13.30    2.00
   0 -26   2    1.70    0.90
   0  26   2    0.20    1.40
   0  26  -2    1.30    1.80
   0  26  -2    1.80    0.80
   0  26   2    1.90    0.90
   1 -26   2   -0.70    0.90
  -1  26  -2   -0.10    1.70
   1  26   2    1.60    1.60
  -1  26  -2    0.50    0.70
   1  26   2   -0.20    0.80
   2 -26   2   20.10    2.30
   2  26   2   20.70    3.80
  -2  26  -2   16.20    3.80
  -2  26  -2   16.60    1.80
   2  26   2   18.40    2.60
   3 -26   2    0.30    1.10
   3  26   2   -1.90    1.00
  -3  26  -2    0.50    1.50
   3  26   2    0.50    1.00
   4 -26   2    0.20    1.10
   4  26   2    2.60    1.40
   4  26   2    2.00    1.20
  -4  26  -2    4.60    2.10
   5 -26   2    3.40    1.30
   5  26   2    3.20    1.90
   5  26   2    3.30    1.40
  -5  26  -2    0.80    2.00
   6 -26   2    0.90    1.20
  -6  26  -2    0.40    2.00
   6  26   2    3.50    1.40
   6  26   2    4.40    2.00
   7 -26   2    8.70    2.20
   7 -26   2    7.20    2.40
  -7  26  -2   13.30    3.40
   7  26   2    8.50    3.00
   7  26   2    8.80    2.00
   8 -26   2    3.90    2.20
   8 -26   2   10.10    2.40
   8  26   2    8.60    2.30
   8  26   2    7.50    2.60
  -8  26  -2    2.90    2.00
   9 -27  -2   -0.20    1.40
   9 -27  -2   -0.30    1.50
  -9  27   2   -1.70    1.70
   9  27  -2   -0.50    1.60
   9  27  -2   -0.40    1.20
   8 -27  -2    9.00    2.10
   8  27  -2    5.60    3.20
   8  27  -2    7.20    2.00
  -8  27   2    7.80    2.70
   7 -27  -2   14.50    2.60
   7 -27  -2   10.40    2.80
  -7  27   2    7.80    2.60
   7  27  -2    9.90    2.20
   7  27  -2    7.20    2.60
  -7  27   2   11.10    1.70
   6 -27  -2   -0.40    1.20
  -6  27   2    2.60    2.00
  -6  27   2   -1.00    0.90
   6  27  -2    1.40    2.00
   6  27  -2   -0.20    1.10
   5 -27  -2   40.60    3.80
   5  27  -2   46.70    3.90
  -5  27   2   40.10    3.10
  -5  27   2   41.90    4.80
   5  27  -2   39.70    5.70
   4 -27  -2    1.80    1.30
   4  27  -2    2.50    1.80
   4  27  -2    0.10    1.00
  -4  27   2    0.70    0.80
  -4  27   2    0.20    1.40
   3 -27  -2    4.20    1.50
  -3  27   2    8.20    2.50
   3  27  -2    4.60    2.10
   3  27  -2    7.00    1.80
  -3  27   2    3.90    1.50
   2  27  -2   28.90    2.80
  -2  27   2   30.70    4.60
   2  27  -2   30.00    4.90
  -2  27   2   28.80    2.70
  -1 -27   2   -0.30    0.80
   1  27  -2    0.60    1.40
  -1  27   2   -0.20    1.40
  -1  27   2    1.70    1.00
   1  27  -2    0.00    1.00
   0 -27   2    5.70    1.20
   0  27   2    6.00    2.10
   0  27  -2    2.70    1.80
   0  27   2    4.50    1.30
   0  27  -2    6.00    1.40
   1 -27   2   12.10    1.90
  -1  27  -2   14.90    3.40
  -1  27  -2   14.00    1.90
   1  27   2    9.40    1.80
   1  27   2    8.00    2.40
  -2  27  -2    1.80    0.90
   2  27   2    0.50    0.80
   2  27   2    1.00    1.50
  -2  27  -2   -1.20    1.40
   3 -27   2    2.30    1.40
  -3  27  -2   -0.50    1.40
   3  27   2    0.10    1.40
   3  27   2    2.50    1.20
   4 -27   2   21.40    3.10
  -4  27  -2   23.80    4.30
   4  27   2   25.80    4.60
   4  27   2   19.90    3.00
   5 -27   2   -0.30    1.10
   5  27   2   -0.60    1.40
   5  27   2   -0.10    1.20
  -5  27  -2    0.90    1.60
   6 -27   2   16.60    2.70
  -6  27  -2   20.90    4.20
   6  27   2   13.60    3.40
   6  27   2   14.50    4.10
   7 -27   2    5.10    2.20
   7 -27   2    0.10    1.30
   7  27   2    4.10    1.80
  -7  27  -2    1.50    2.30
   7  27   2    1.60    2.20
   8 -28  -2    7.60    2.40
   8 -28  -2    8.50    2.50
   8  28  -2    9.40    2.70
   8  28  -2    9.70    2.30
  -8  28   2    8.40    2.70
   7 -28  -2    5.10    1.90
  -7  28   2    3.20    2.20
   7  28  -2    5.10    1.70
   7  28  -2    3.60    2.20
   6 -28  -2   65.89    5.30
   6  28  -2   62.29    7.10
  -6  28   2   54.59    5.70
  -6  28   2   65.89    4.10
   6  28  -2   71.49    5.30
   5 -28  -2    2.20    1.20
  -5  28   2    5.10    1.90
  -5  28   2    3.90    1.30
   5  28  -2    6.00    1.80
   5  28  -2    3.90    2.20
   4 -28  -2   21.10    3.00
  -4  28   2   22.10    2.30
  -4  28   2   21.20    3.90
   4  28  -2   29.00    4.80
   4  28  -2   24.50    2.70
   3 -28  -2    7.60    1.60
   3  28  -2    2.50    1.60
  -3  28   2    4.80    2.10
   3  28  -2    3.80    1.50
  -3  28   2    4.30    1.30
  -2  28   2    8.40    2.60
  -2  28   2    4.70    1.20
   2  28  -2   11.10    1.90
   2  28  -2    4.70    2.20
  -1 -28   2   14.30    1.90
  -1  28   2   13.40    3.00
   1  28  -2   16.10    3.50
  -1  28   2   14.10    2.20
   0 -28   2   13.50    2.00
   0  28   2   10.30    2.80
   0  28  -2   12.10    1.90
   0  28  -2   11.00    3.10
   0  28   2   11.00    1.90
   1 -28   2    5.30    1.40
  -1  28  -2    5.20    1.30
  -1  28  -2    2.80    2.20
   1  28   2    3.50    1.40
   1  28   2    7.40    2.20
   2 -28   2   11.60    2.10
  -2  28  -2   12.30    3.50
  -2  28  -2   17.00    1.90
   2  28   2   13.10    2.20
   2  28   2   13.20    3.40
   3 -28   2    5.50    1.50
   3  28   2    5.40    1.80
   3  28   2    8.70    2.40
  -3  28  -2    9.20    2.90
   4 -28   2    0.90    1.20
   4  28   2    0.80    1.40
   4  28   2   -1.80    1.30
  -4  28  -2    2.10    2.00
   5 -28   2   49.90    4.40
   5  28   2   51.89    4.40
  -5  28  -2   46.50    6.30
   5  28   2   44.60    6.90
   6 -28   2    1.90    1.60
   6  28   2    3.90    1.60
   6  28   2    0.70    1.90
  -6  28  -2    3.10    2.60
   7 -29  -2    2.20    1.60
   7 -29  -2    1.10    1.40
  -7  29   2    0.10    1.70
  -7  29   2   -3.90    1.50
   7  29  -2    0.70    1.70
   6 -29  -2    3.80    1.70
  -6  29   2    0.10    1.60
   6  29  -2    1.00    1.20
   6  29  -2    1.10    1.70
  -6  29   2    0.60    1.10
   5 -29  -2   56.19    4.80
   5  29  -2   56.69    4.60
  -5  29   2   62.79    4.00
  -5  29   2   47.90    5.70
   4 -29  -2    4.10    1.60
   4  29  -2    7.00    2.50
   4  29  -2    6.60    1.70
  -4  29   2    4.90    2.10
  -4  29   2    6.70    1.50
   3 -29  -2    3.30    1.50
   3  29  -2    4.90    1.50
   3  29  -2    2.40    1.70
  -3  29   2    3.90    1.30
  -3  29   2    2.60    1.60
   2  29  -2   31.70    5.30
   2  29  -2   26.70    2.70
  -2  29   2   25.70    4.50
  -2  29   2   21.30    2.30
   1  29  -2    2.40    1.00
  -1  29   2    3.80    1.60
   1  29  -2    0.90    1.80
  -1  29   2    1.40    1.10
   0 -29   2    8.50    1.60
   0  29   2    7.40    2.50
   0  29   2    7.50    1.60
   0  29  -2    7.30    1.60
   0  29  -2    5.60    2.40
   1 -29   2   21.70    2.40
  -1  29  -2   19.40    2.10
  -1  29  -2   18.90    4.10
   1  29   2   17.30    2.60
   1  29   2   15.80    3.70
   2 -29   2   -1.30    1.10
   2  29   2    3.50    1.30
   2  29   2    1.70    1.80
  -2  29  -2    2.80    2.00
  -2  29  -2    3.80    1.00
   3 -29   2    0.00    1.20
   3  29   2    1.10    1.80
   3  29   2    0.60    1.20
  -3  29  -2   -0.30    1.60
   4 -29   2   64.79    5.00
  -4  29  -2   60.29    6.50
   4  29   2   56.29    6.10
   4  29   2   64.09    5.00
   5 -29   2    4.70    1.40
  -5  29  -2    0.10    1.90
   5  29   2    0.20    2.10
   5  29   2    0.20    1.20
   5 -30  -2   13.60    2.70
  -5  30   2   10.30    3.20
   5  30  -2   12.50    2.40
   5  30  -2   17.00    3.60
   4 -30  -2    8.70    2.00
   4  30  -2    6.20    2.90
  -4  30   2    7.20    2.80
  -4  30   2    5.80    1.40
   4  30  -2    9.40    2.00
   3  30  -2    4.70    2.60
   3  30  -2    5.30    1.60
  -3  30   2    4.60    1.50
  -3  30   2    3.70    2.00
   2  30  -2    1.20    1.30
  -2  30   2    2.90    1.20
  -2  30   2    2.30    1.90
   1  30  -2   31.10    2.90
  -1  30   2   29.10    4.90
   1  30  -2   19.90    4.80
  -1  30   2   25.10    2.70
   0 -30   2   12.40    1.90
   0  30   2   11.40    2.90
   0  30   2   11.00    2.10
   0  30  -2   12.70    3.50
   1 -30   2    2.00    1.30
   1  30   2    3.90    1.40
   1  30   2    1.80    2.00
  -1  30  -2    2.50    2.50
  -1  30  -2    3.20    1.10
   2 -30   2   22.00    2.80
   2  30   2   12.50    2.30
  -2  30  -2   16.20    4.30
   2  30   2   19.50    4.40
   3 -30   2    2.40    1.40
   3  30   2   -1.60    1.70
   3  30   2    4.40    1.60
   4 -30   2    0.00    1.40
   4  30   2   -0.10    2.00
  -4  30  -2    1.20    2.10
   4  30   2    3.90    1.80
  -3  31   2   -0.60    1.10
   3  31  -2    0.60    1.20
  -3  31   2   -3.30    1.60
   3  31  -2   -1.90    1.90
   2  31  -2   55.69    4.20
   2  31  -2   49.90    6.80
  -2  31   2   49.90    3.90
  -2  31   2   61.19   10.70
   1  31  -2    2.00    1.40
   1  31  -2   -1.20    1.60
  -1  31   2    1.10    1.30
   0 -31   2    2.60    1.30
   0  31  -2    4.10    1.30
   0  31   2    6.60    2.30
   0  31  -2    0.90    2.00
   0  31   2    2.50    1.40
   1 -31   2   42.70    5.00
   1  31   2   54.89    5.70
  -1  31  -2   33.00    3.10
   1  31   2   56.09    4.10
  -1  31  -2   48.60    6.60
   2 -31   2    0.60    1.30
   2  31   2    2.30    1.30
   2  31   2   -1.40    1.60
  -2  31  -2   -0.10    1.90
  17   0  -3    0.60    1.50
  17   0  -3    2.80    1.60
  17   0  -3   -1.50    1.90
  16   0  -3   -0.40    1.30
  16   0  -3   -0.70    1.30
  16   0  -3    2.20    1.50
  15   0  -3    0.80    1.00
  15   0  -3   -1.10    1.40
  15   0  -3    1.90    1.20
  14   0  -3    0.50    1.30
  14   0  -3   -0.80    0.80
  14   0  -3    0.00    1.00
  13   0  -3   -0.20    1.10
  13   0  -3   -0.30    0.70
  13   0  -3   -2.50    0.80
  12   0  -3    0.00    0.60
  12   0  -3    0.60    1.00
  12   0  -3    0.10    1.00
  11   0  -3   -0.10    0.50
  11   0  -3   -0.50    0.80
  11   0  -3    0.50    0.80
  10   0  -3    0.90    0.50
  10   0  -3    0.60    0.90
  10   0  -3   -0.60    0.70
   9   0  -3    1.40    0.60
   9   0  -3    0.50    0.50
   9   0  -3    1.00    0.40
   8   0  -3   -0.20    0.40
   8   0  -3   -0.10    0.60
   8   0  -3    0.50    0.60
   7   0  -3   -0.70    0.40
   7   0  -3    0.10    0.50
   7   0  -3    0.10    0.30
   6   0  -3   -0.20    0.20
   6   0  -3    0.10    0.50
  -6   0   3    0.60    0.50
   6   0  -3    0.10    0.50
   5   0  -3    0.20    0.40
  -5   0   3    0.00    0.40
   5   0  -3    0.20    0.20
   5   0  -3    0.00    0.40
   4   0  -3    0.30    0.20
   4   0  -3    0.50    0.40
  -4   0   3    0.00    0.30
  -4   0   3   -0.10    0.20
   4   0  -3    0.30    0.40
   3   0  -3   -0.10    0.30
  -3   0   3    0.30    0.30
   3   0  -3   -0.30    0.30
  -3   0   3    0.50    0.30
  -3   0   3   -0.10    0.20
   3   0  -3    0.20    0.20
   2   0  -3    0.10    0.30
  -2   0   3    0.50    0.30
  -2   0   3    0.00    0.20
  -1   0   3    0.70    0.40
  -1   0   3    0.10    0.30
  -1   0   3   -0.20    0.30
   1   0  -3    0.10    0.30
   0   0   3   -0.10    0.20
   0   0  -3    0.00    0.20
   0   0   3    0.20    0.30
   1   0   3    0.00    0.40
  -1   0  -3    0.20    0.30
   1   0   3    0.20    0.30
   2   0   3    0.00    0.40
  -2   0  -3   -0.20    0.30
   2   0   3    0.70    0.30
   2   0   3    0.50    0.30
  -3   0  -3   -0.10    0.40
   3   0   3    0.40    0.40
   3   0   3    0.10    0.50
  -3   0  -3   -0.10    0.30
   3   0   3    0.70    0.40
   4   0   3   -0.20    0.40
[truncated: 1,025,256 more chars]
