# Supplementary material for: Exploring the Interaction of Pyridine-Based Chalcones with Trinuclear Silver(I) Pyrazolate Complex
Source: MDPI journal article supplement (doi:10.3390/inorganics11040175), 2023-04-21
Supplement: s1 [file s1 › SI.pdf]

# Supporting Information for

## Exploring the Interaction of Pyridine-Based Chalcones with Trinuclear Silver(I) Pyrazolate Complex

Arina Olbrykh<sup>1,2</sup>, Aleksei Titov<sup>1</sup>, Alexander Smol'yakov<sup>1,3</sup>, Oleg Filippov<sup>1</sup>, Elena S. Shubina<sup>1\*</sup>

1 A. N. Nesmeyanov Institute of Organoelement Compounds, Russian Academy of Sciences, Vavilov Str., 28,

119991 Moscow, Russia; arinaolbr@gmail.com (A.O.); tit@ineos.ac.ru (A.T.); rengenhik@gmail.com (A.S.), h-bond@ineos.ac.ru (O.F.); shu@ineos.ac.ru (E.S.S.)

2 Higher Chemical College, Mendeleev University of Chemical Technology of Russia, Miusskaya Sq. 9, 125047 Moscow, Russia; arinaolbr@gmail.com (A.O.);

3 Plekhanov Russian University of Economics, Stremyanny per. 36, Moscow 117997, Russia; rengenhik@gmail.com (A.S.)

\* Correspondence shu@ineos.ac.ru (E.S.S.)

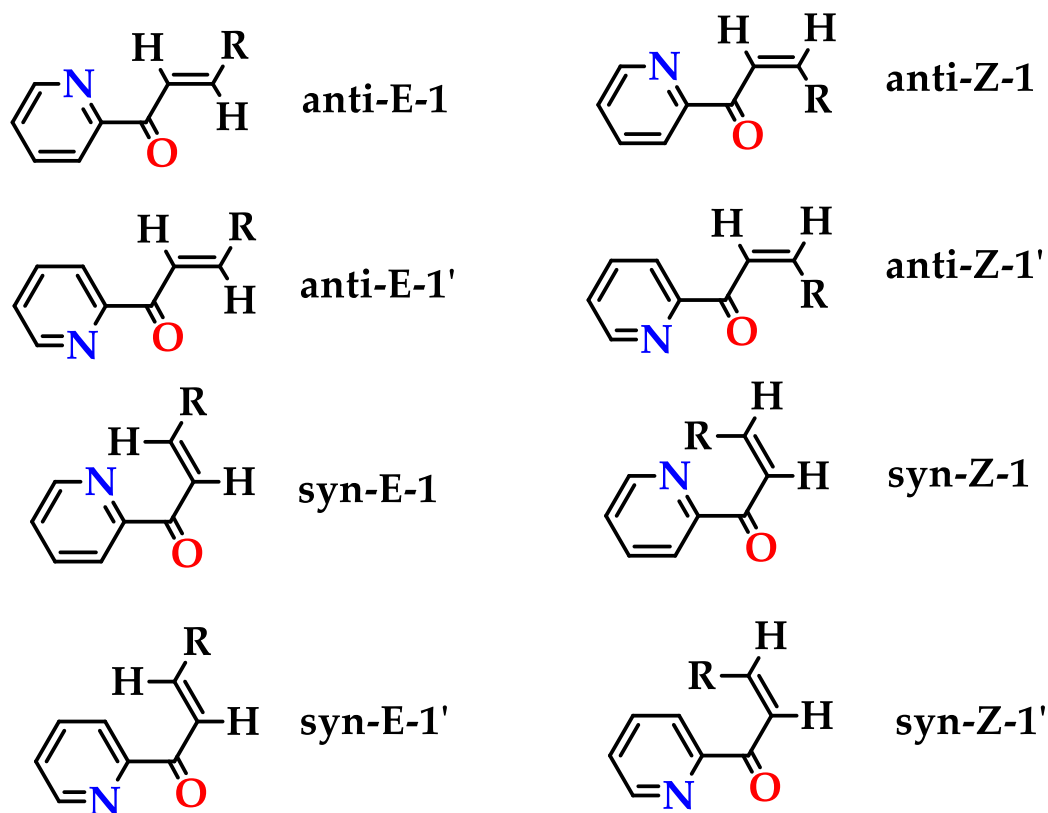

Scheme S1. Possible isomers for pyridine- based chalcones.

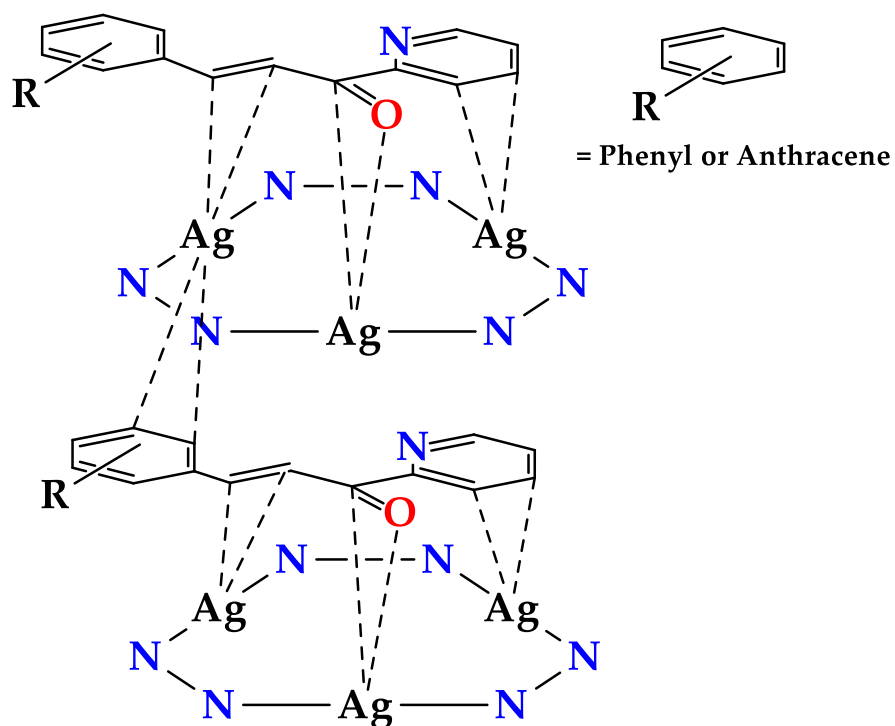

Scheme S2. Schematic representation of supramolecular packing of E-1Ag and E-2Ag.

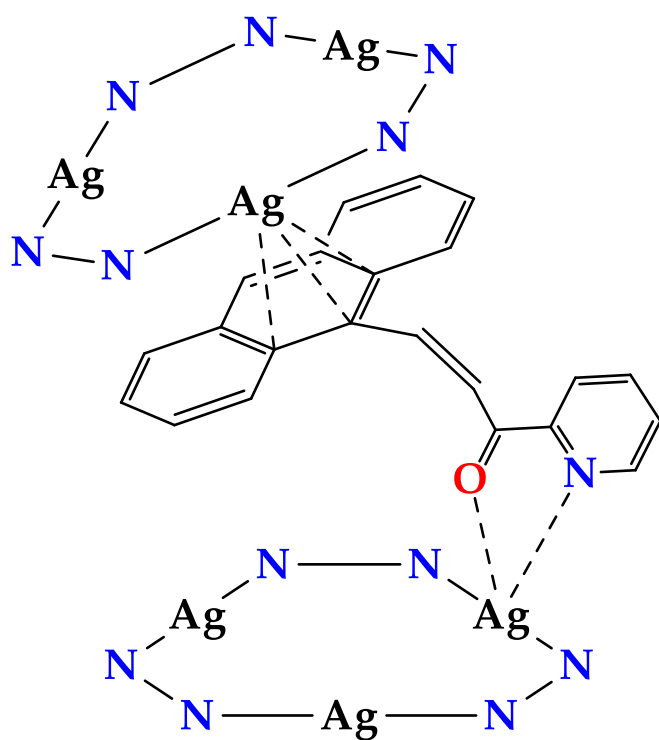

Scheme S3. Schematic representation of supramolecular packing of Z-1Ag.

Table S1. Crystal data, data collection, and structure refinement parameters for E-1Ag and E-2Ag, Z-1Ag.

| Complex                                         | E-1Ag                                                                            | E-2Ag                                                                                              | Z-1Ag                                                                            |
|-------------------------------------------------|----------------------------------------------------------------------------------|----------------------------------------------------------------------------------------------------|----------------------------------------------------------------------------------|
| Empirical formula                               | C <sub>37</sub> H <sub>18</sub> Ag <sub>3</sub> F <sub>18</sub> N <sub>7</sub> O | C <sub>29</sub> H <sub>14.5</sub> Ag <sub>3</sub> F <sub>18</sub> N <sub>7</sub> O <sub>1.25</sub> | C <sub>37</sub> H <sub>18</sub> Ag <sub>3</sub> F <sub>18</sub> N <sub>7</sub> O |
| Formula weight                                  | 1242.19                                                                          | 1146.59                                                                                            | 1242.19                                                                          |
| Temperature/K                                   | 100                                                                              | 100                                                                                                | 100                                                                              |
| Crystal system                                  | triclinic                                                                        | monoclinic                                                                                         | monoclinic                                                                       |
| Space group                                     | P1                                                                               | P21/c                                                                                              | P21/n                                                                            |
| a/Å                                             | 7.8326(2)                                                                        | 12.8452(5)                                                                                         | 13.1222(8)                                                                       |
| b/Å                                             | 11.0556(2)                                                                       | 22.8123(8)                                                                                         | 14.3897(10)                                                                      |
| c/Å                                             | 12.8446(3)                                                                       | 13.0509(5)                                                                                         | 20.6671(14)                                                                      |
| $\alpha$ /°                                     | 114.7540(10)                                                                     | 90                                                                                                 | 90                                                                               |
| $\beta$ /°                                      | 102.7180(10)                                                                     | 115.750(2)                                                                                         | 91.486(3)                                                                        |
| $\gamma$ /°                                     | 94.9140(10)                                                                      | 90                                                                                                 | 90                                                                               |
| Volume/Å <sup>3</sup>                           | 965.22(4)                                                                        | 3444.5(2)                                                                                          | 3901.1(4)                                                                        |
| Z                                               | 1                                                                                | 4                                                                                                  | 4                                                                                |
| $\rho_{\text{calc}}$ /cm <sup>3</sup>           | 2.137                                                                            | 2.211                                                                                              | 2.115                                                                            |
| $\mu$ /mm <sup>-1</sup>                         | 1.638                                                                            | 1.826                                                                                              | 1.621                                                                            |
| F(000)                                          | 600                                                                              | 2202                                                                                               | 2400                                                                             |
| Crystal size/mm <sup>3</sup>                    | 0.24 × 0.17 × 0.08                                                               | 0.24 × 0.17 × 0.11                                                                                 | 0.21 × 0.15 × 0.11                                                               |
| Radiation                                       | MoK $\alpha$ ( $\lambda$ = 0.71073)                                              | MoK $\alpha$ ( $\lambda$ = 0.71073)                                                                | MoK $\alpha$ ( $\lambda$ = 0.71073)                                              |
| 2 $\Theta$ range for data collection/°          | 4.102 to 51.996                                                                  | 3.898 to 59.302                                                                                    | 3.72 to 51.996                                                                   |
| Reflections collected                           | 9600                                                                             | 47024                                                                                              | 44445                                                                            |
| Independent reflections                         | 5359 [ $R_{\text{int}}$ = 0.0170, $R_{\text{sigma}}$ = 0.0306]                   | 9692 [ $R_{\text{int}}$ = 0.0512, $R_{\text{sigma}}$ = 0.0415]                                     | 7611 [ $R_{\text{int}}$ = 0.0415, $R_{\text{sigma}}$ = 0.0295]                   |
| Data/restraints/parameters                      | 5359/3/595                                                                       | 9692/66/584                                                                                        | 7611/6/604                                                                       |
| Goodness-of-fit on F <sup>2</sup>               | 1.037                                                                            | 1.032                                                                                              | 1.151                                                                            |
| Final R indexes [ $I \geq 2\sigma(I)$ ]         | $R_1$ = 0.0153, $wR_2$ = 0.0367                                                  | $R_1$ = 0.0388, $wR_2$ = 0.0888                                                                    | $R_1$ = 0.0424, $wR_2$ = 0.0955                                                  |
| Final R indexes [all data]                      | $R_1$ = 0.0155, $wR_2$ = 0.0368                                                  | $R_1$ = 0.0512, $wR_2$ = 0.0956                                                                    | $R_1$ = 0.0462, $wR_2$ = 0.0978                                                  |
| Largest diff. peak<br>/hole / e Å <sup>-3</sup> | 0.44/-0.34                                                                       | 1.77/-0.99                                                                                         | 1.55/-0.9                                                                        |

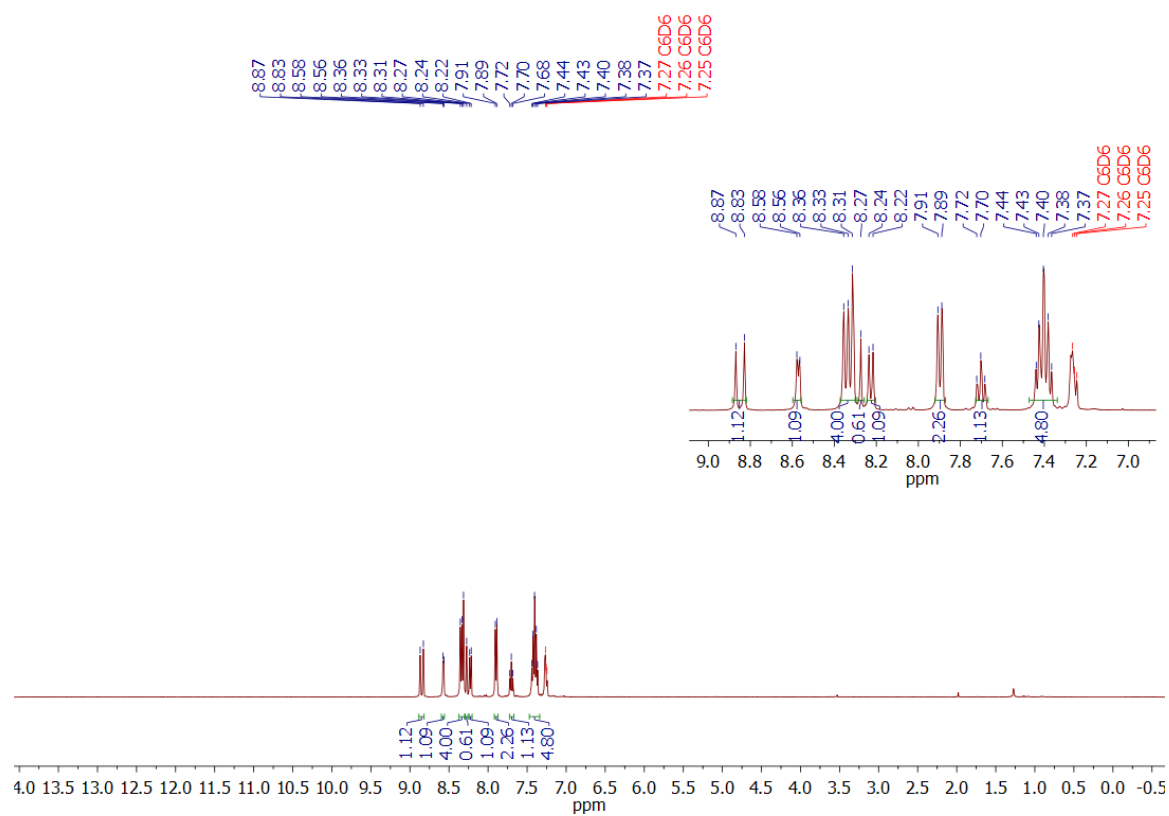

Figure S1. <sup>1</sup>H NMR spectrum of E-1 in the mixture CCl<sub>4</sub>/benzene-d<sub>6</sub> (9/1).

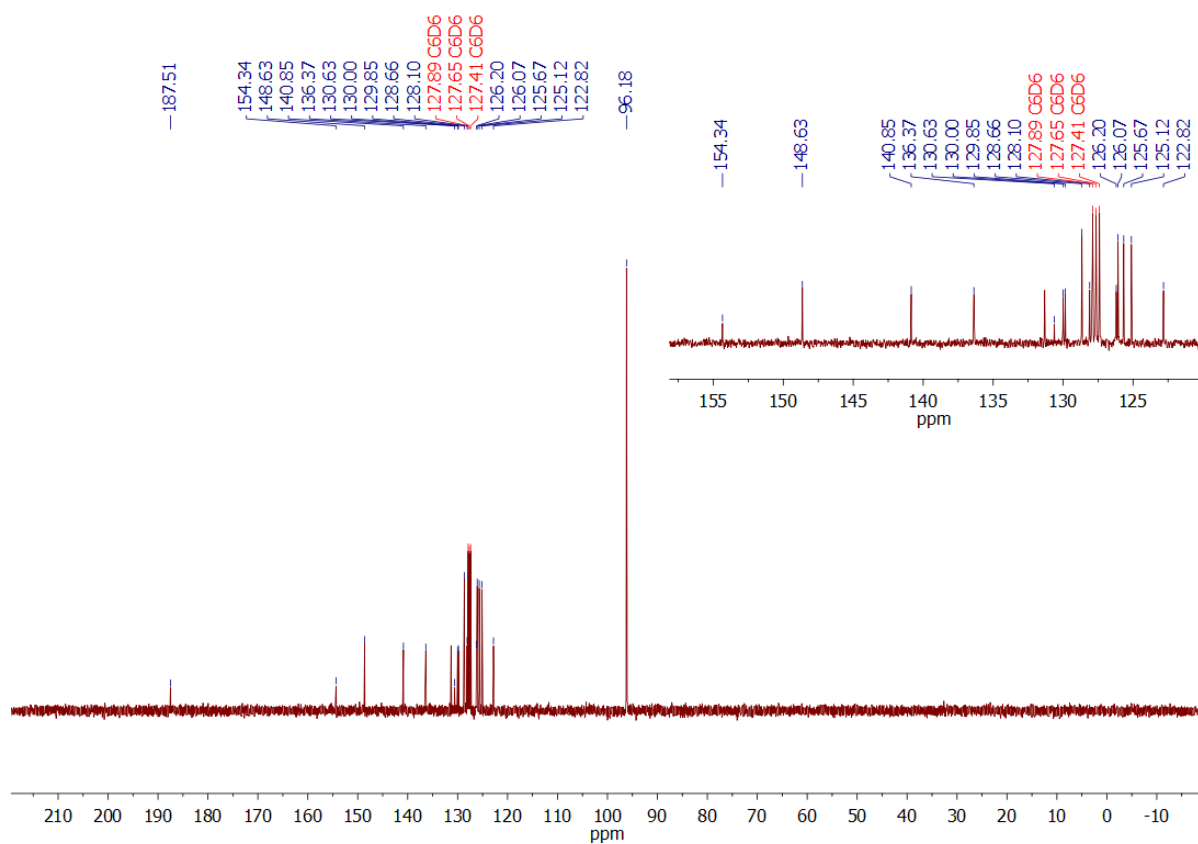

Figure S2. <sup>13</sup>C NMR spectrum of E-1 in CCl<sub>4</sub>/benzene-d<sub>6</sub> (9/1) mixture.

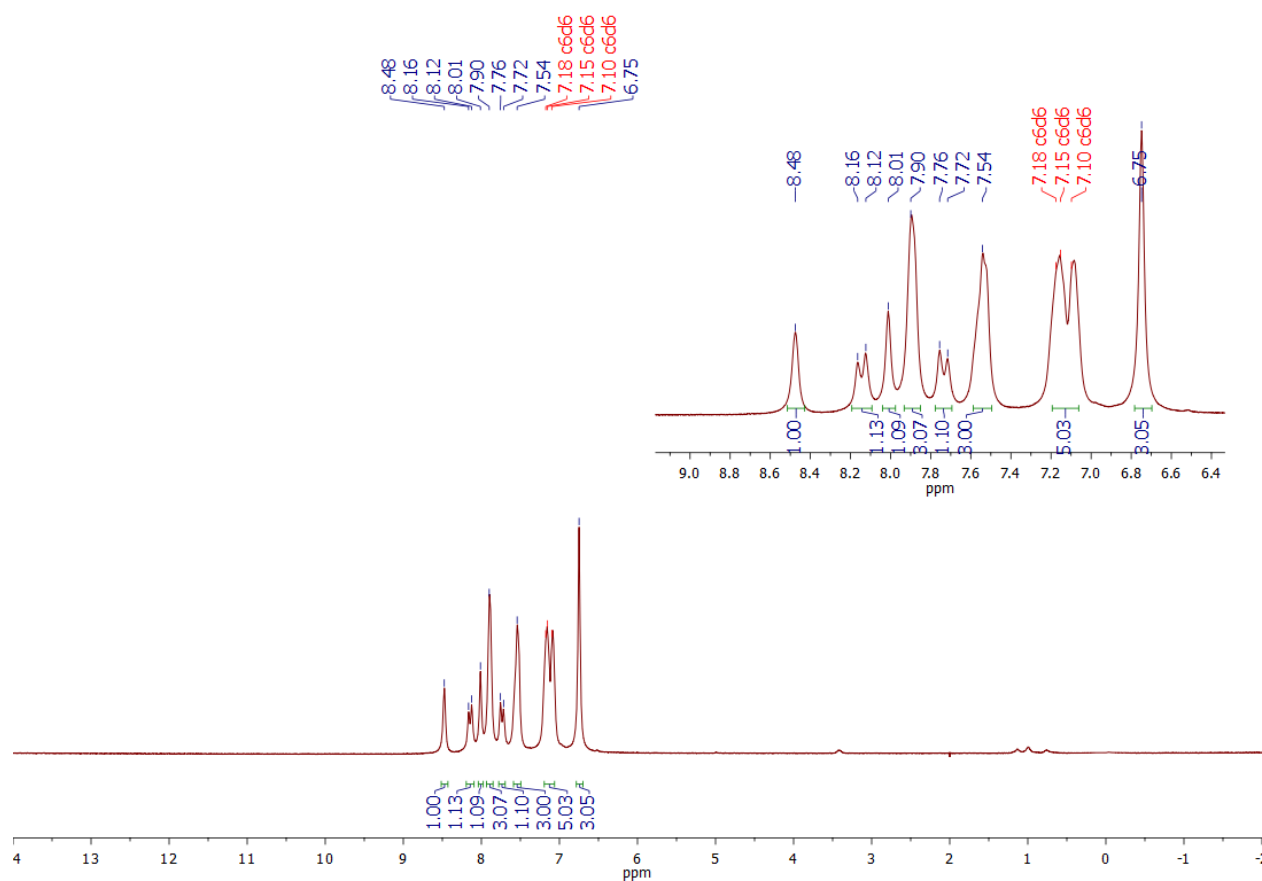

Figure S3. <sup>1</sup>H NMR spectrum of E-1 + 1 eq. [AgPz]<sub>3</sub> in CCl<sub>4</sub>/benzene-d<sub>6</sub> (9/1) mixture.

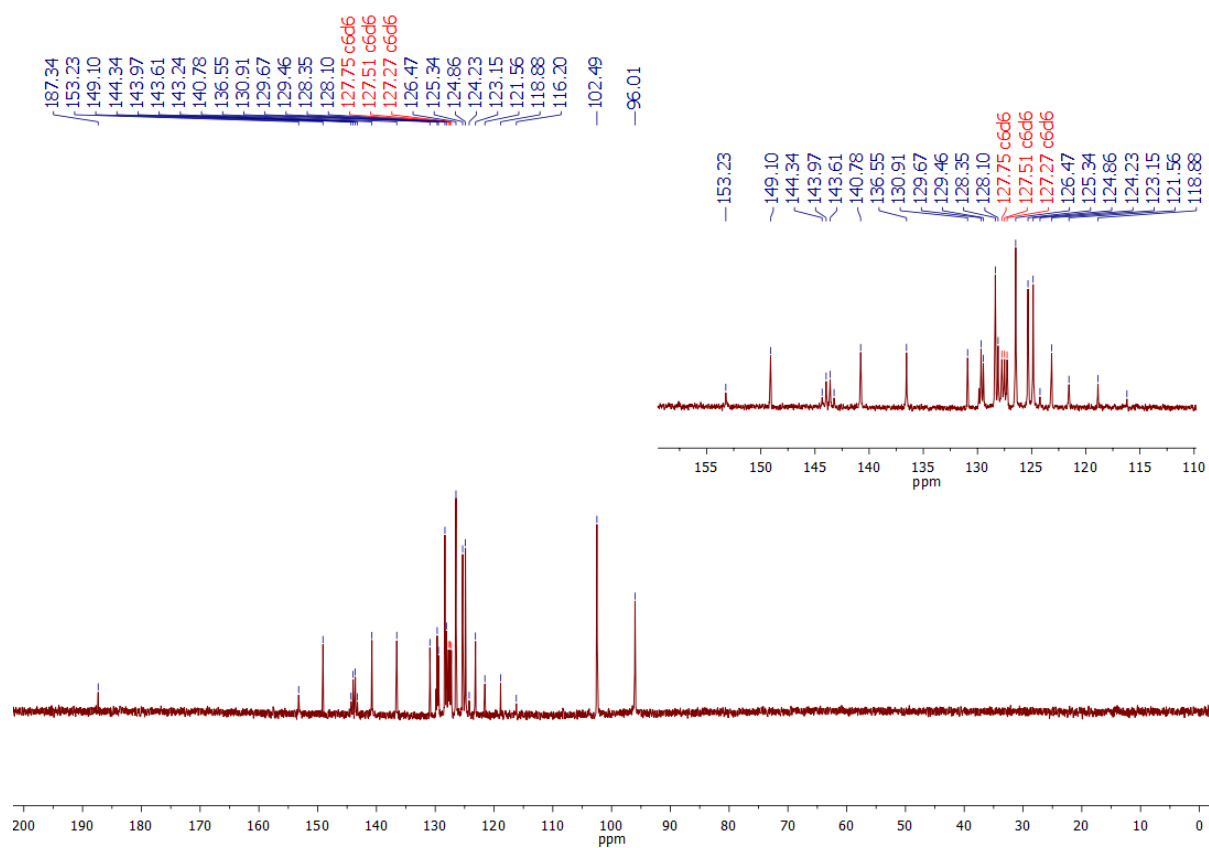

Figure S4. <sup>13</sup>C NMR spectrum of E-1 + 1 eq. [AgPz]<sub>3</sub> in CCl<sub>4</sub>/benzene-d<sub>6</sub> (9/1) mixture.

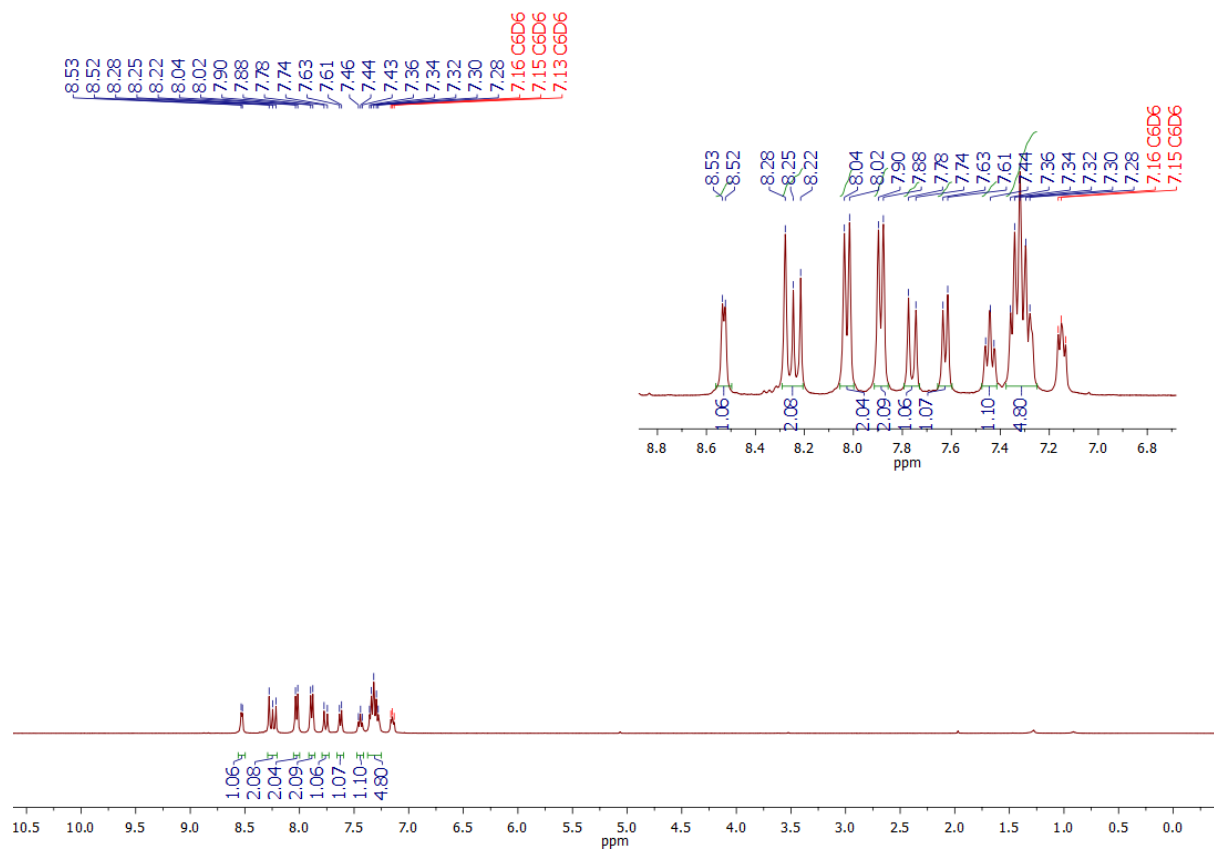

Figure S5. <sup>1</sup>H NMR spectrum of Z-1 in CCl<sub>4</sub>/benzene-d<sub>6</sub> (9/1) mixture.

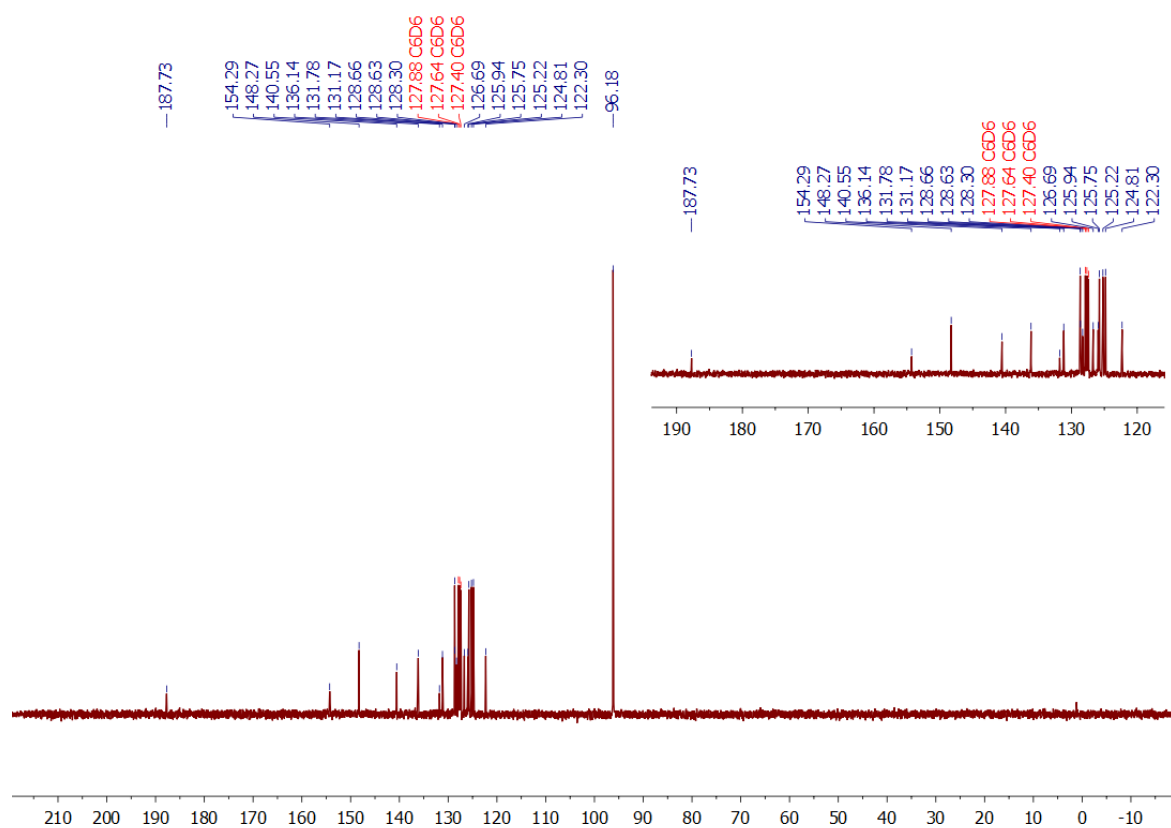

Figure S6. <sup>13</sup>C NMR spectrum of Z-1 in CCl<sub>4</sub>/benzene-d<sub>6</sub> (9/1) mixture.

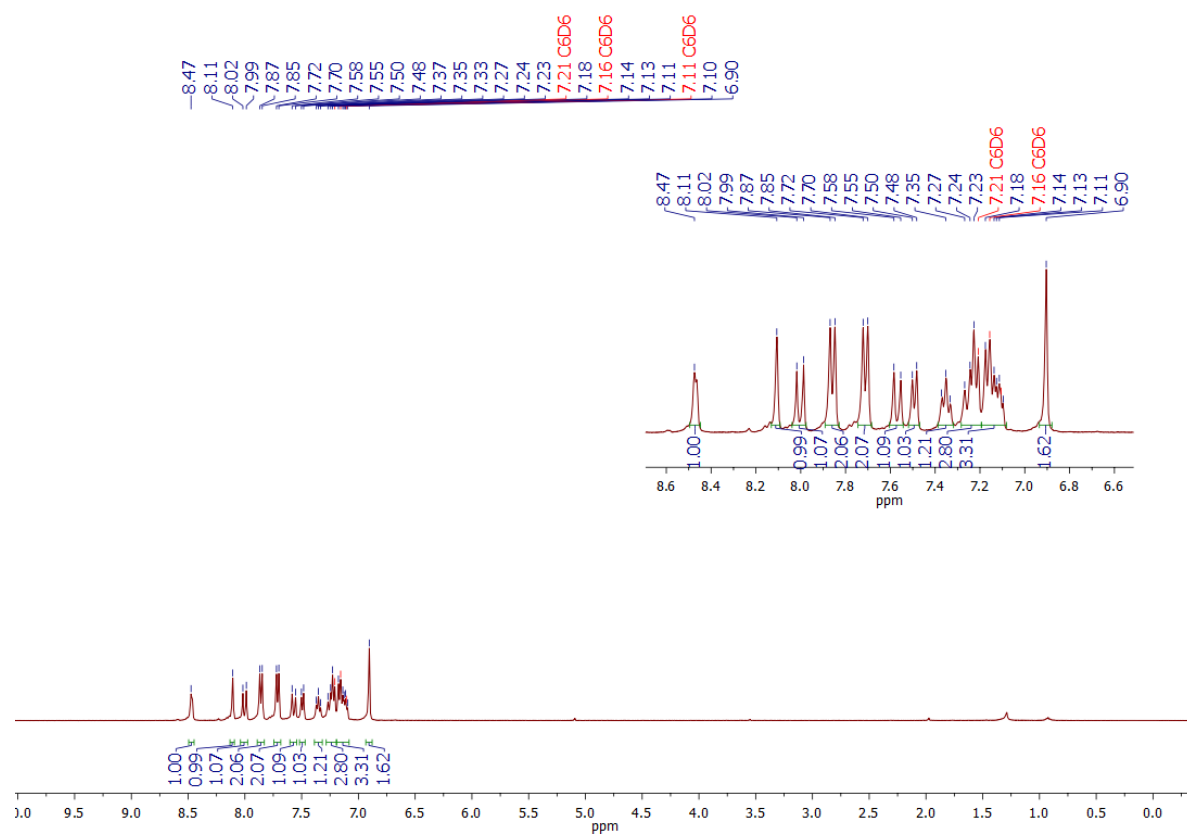

Figure S7. <sup>1</sup>H NMR spectrum of Z-1+0.5 eq. [AgPz]<sub>3</sub> in CCl<sub>4</sub>/benzene-d<sub>6</sub> (9/1) mixture.

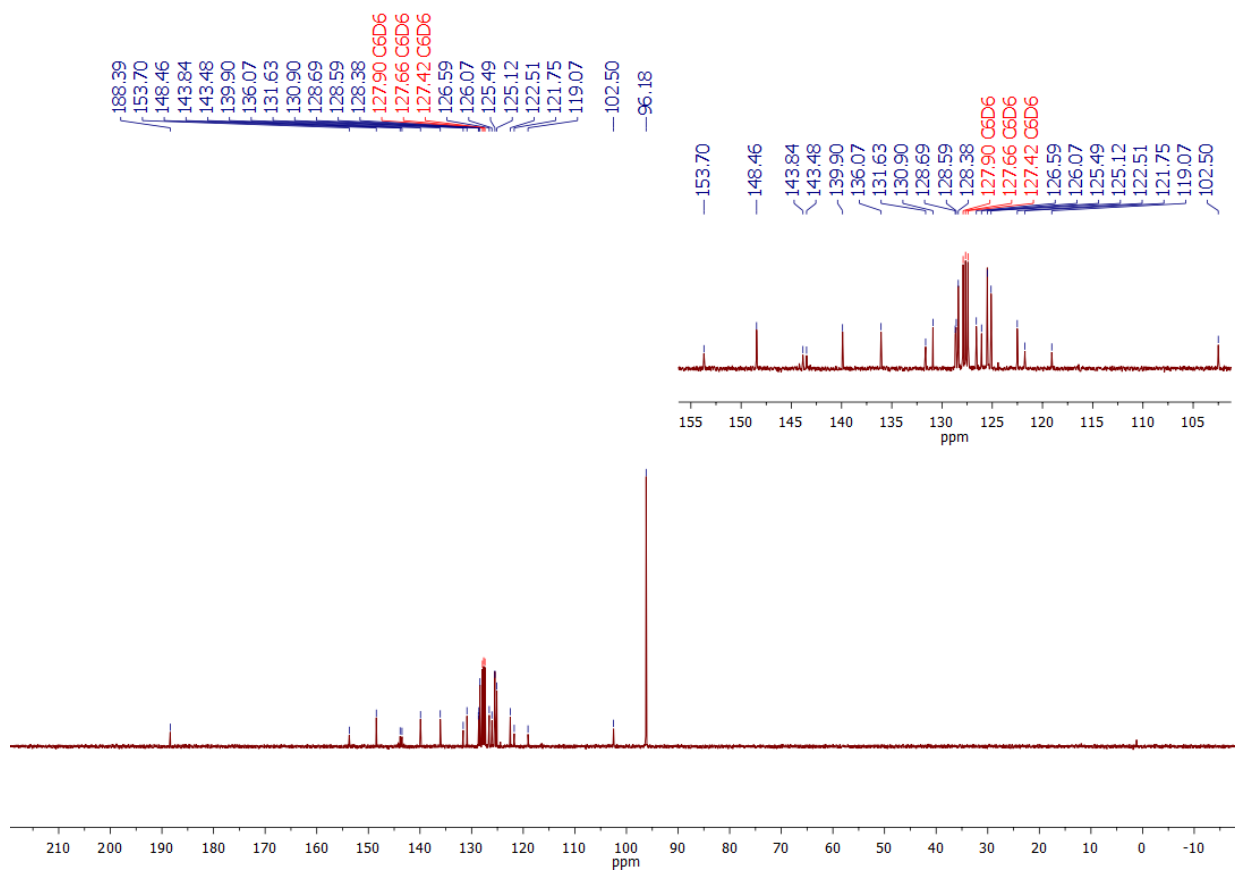

Figure S8. <sup>13</sup>C NMR spectrum of Z-1+0.5 eq. [AgPz]<sub>3</sub> in CCl<sub>4</sub>/benzene-d<sub>6</sub> (9/1) mixture.

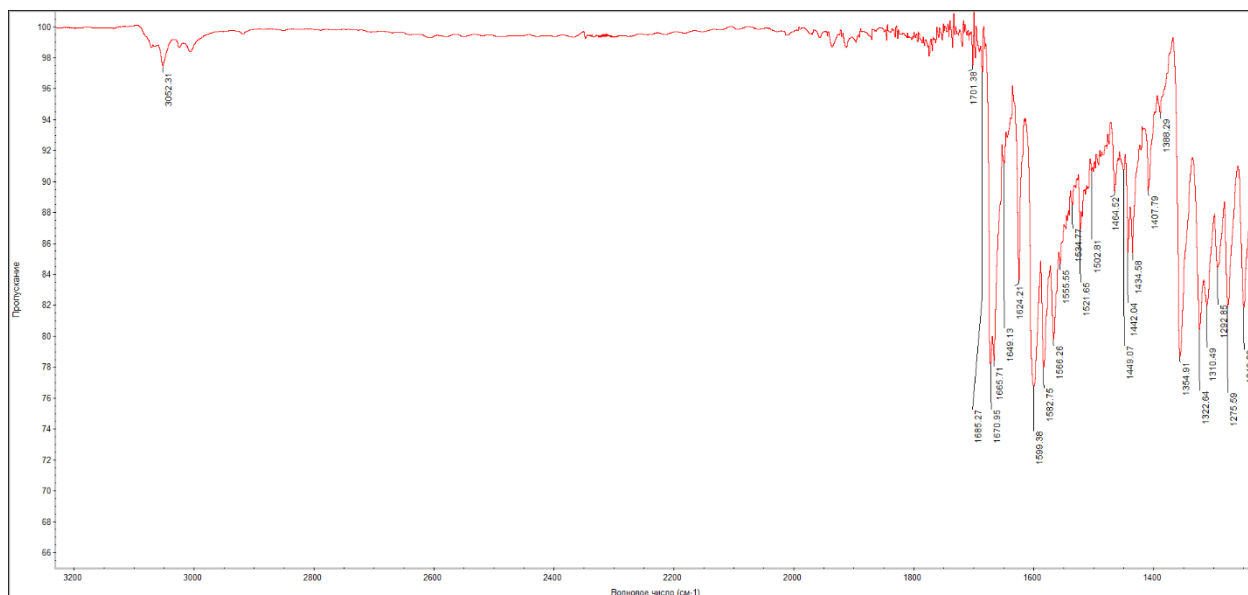

Figure S9. IR spectra of E-1 in KBr.

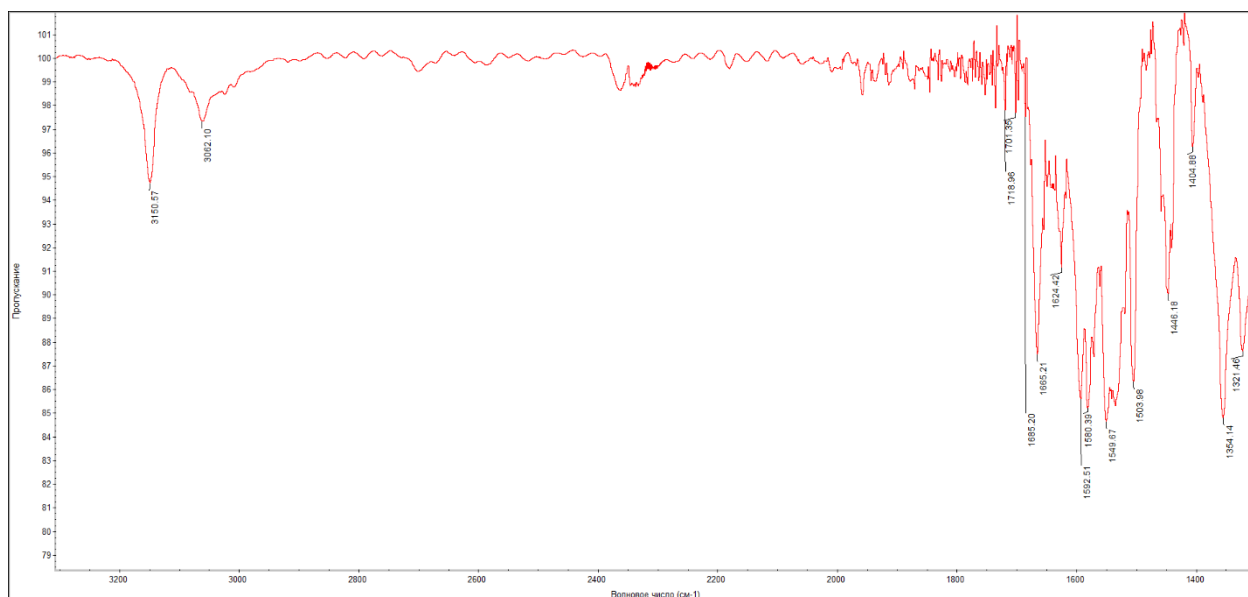

Figure S10. IR spectra of E-1Ag in KBr.

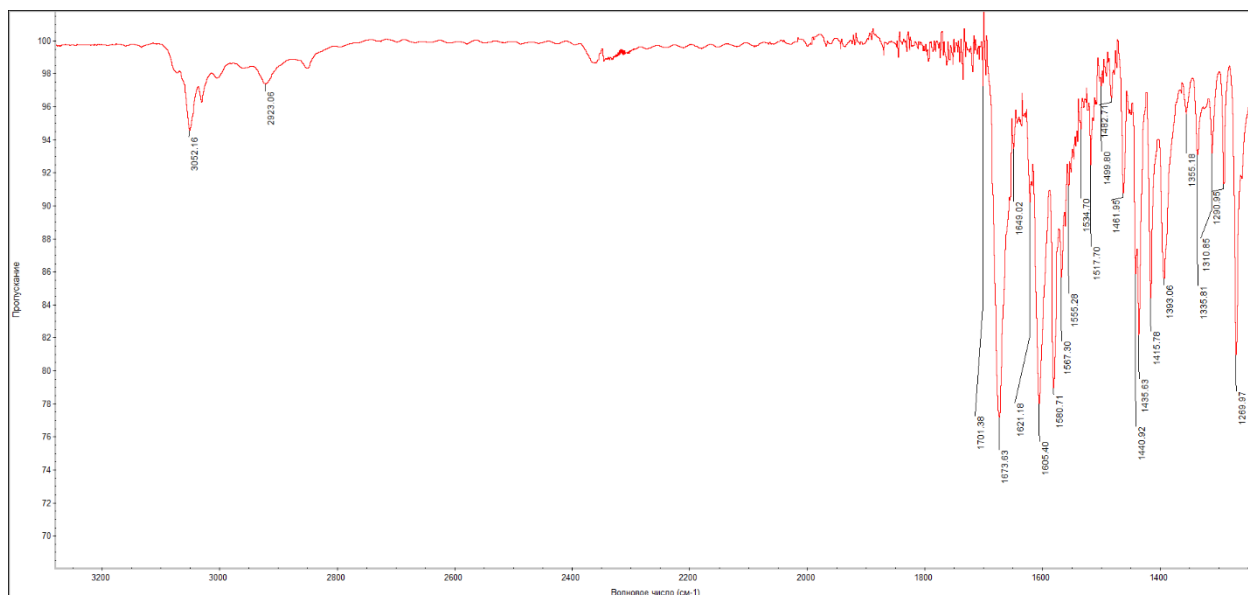

Figure S11. IR spectra of Z-1 in KBr.

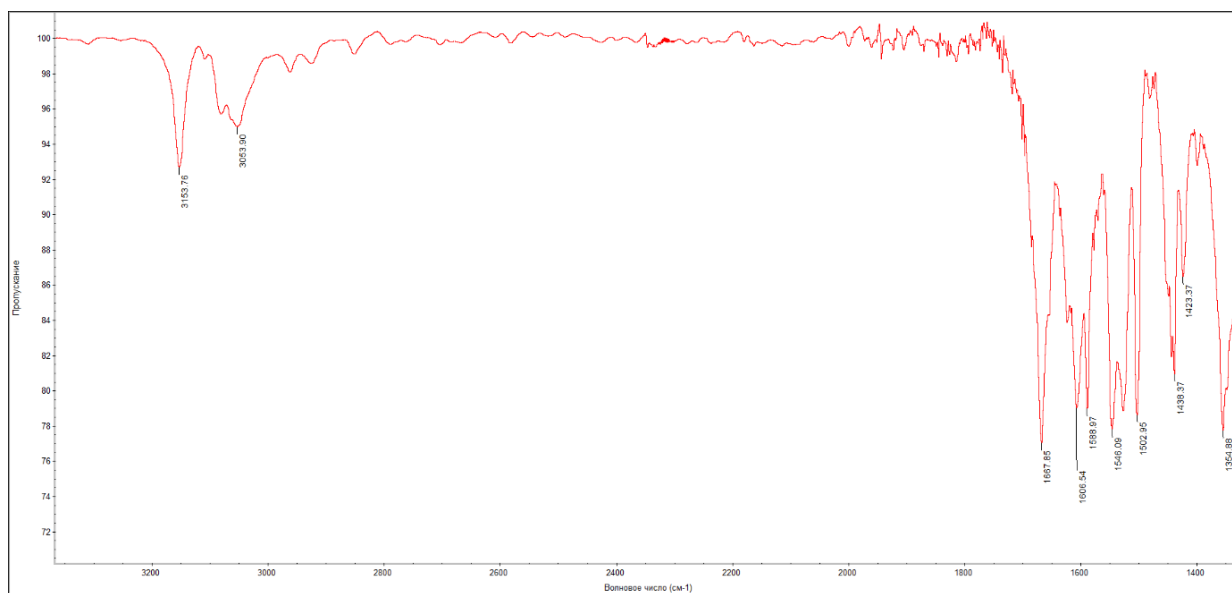

Figure S12. IR spectra of Z-1Ag in KBr.

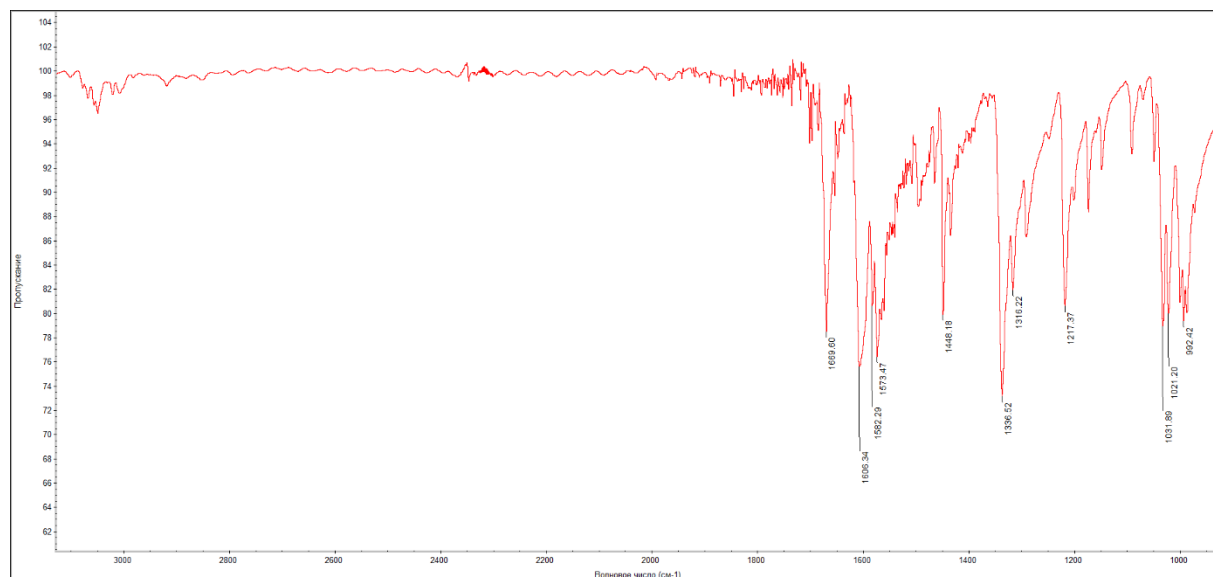

Figure S13. IR spectra of E-2 in KBr.

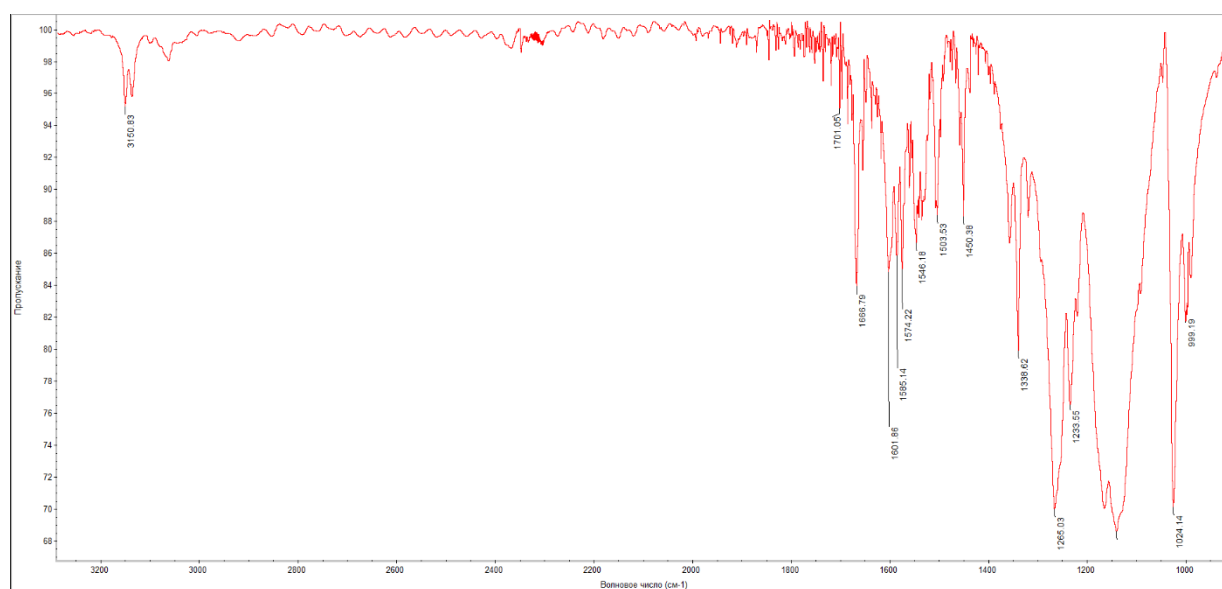

Figure S14. IR spectra of E-2Ag in KBr.

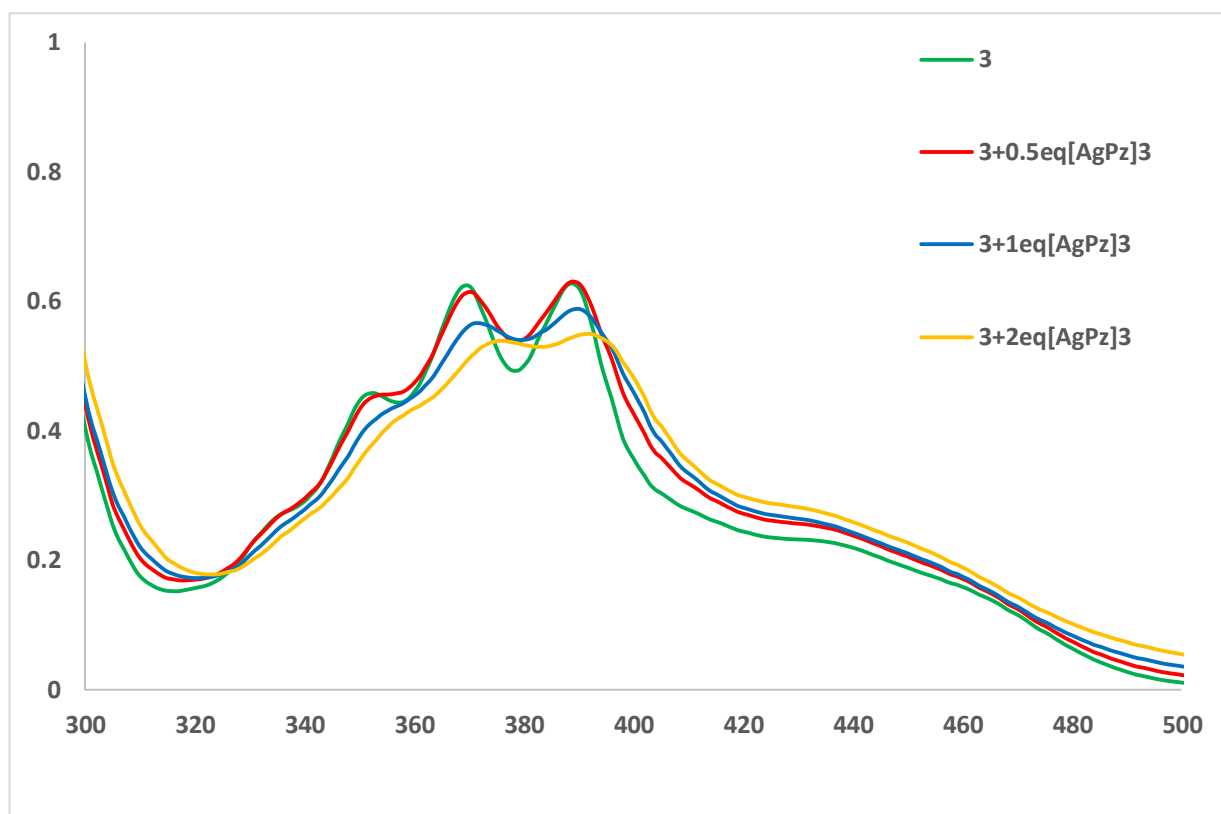

Figure S15. UV-vis spectra of Z-1 + [AgPz]<sub>3</sub> c=0.015M d=0.0047 cm in CCl<sub>4</sub>.

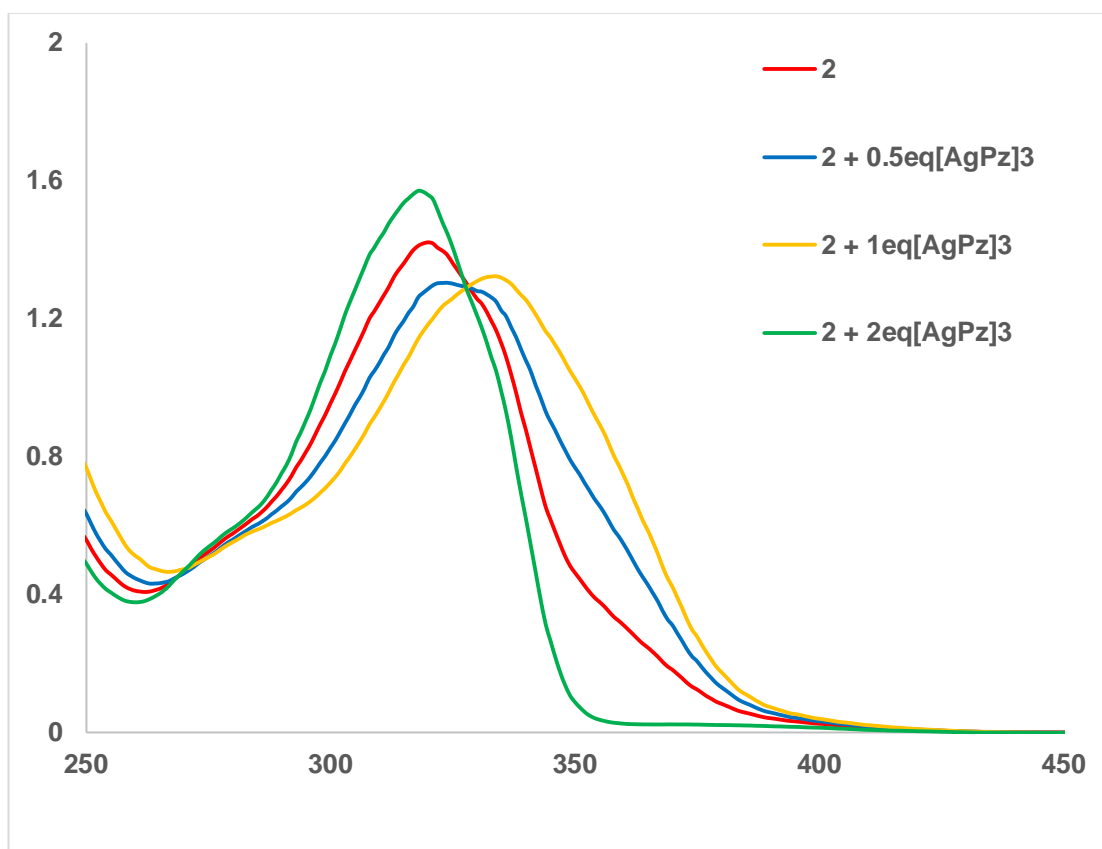

Figure S16. UV-vis spectra of E-2 + [AgPz]<sub>3</sub> c=0.015M d=0.0047cm in CCl<sub>4</sub>.

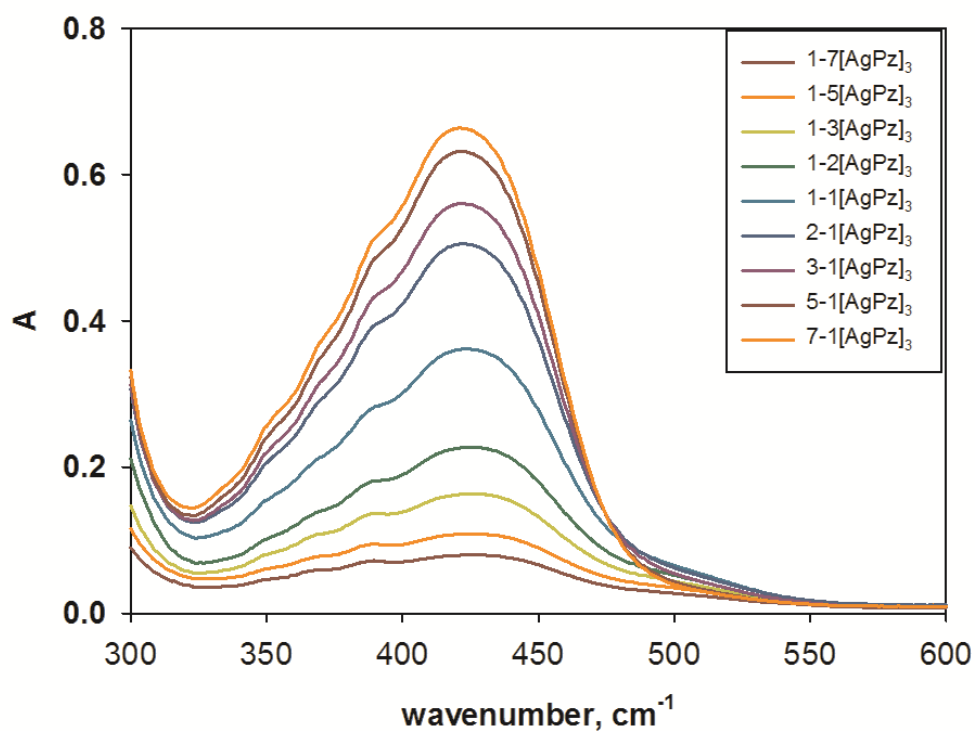

Figure S17. UV-vis spectra of E-1 + [AgPz]<sub>3</sub> c=0.015M d=0.0047cm in CCl<sub>4</sub>.

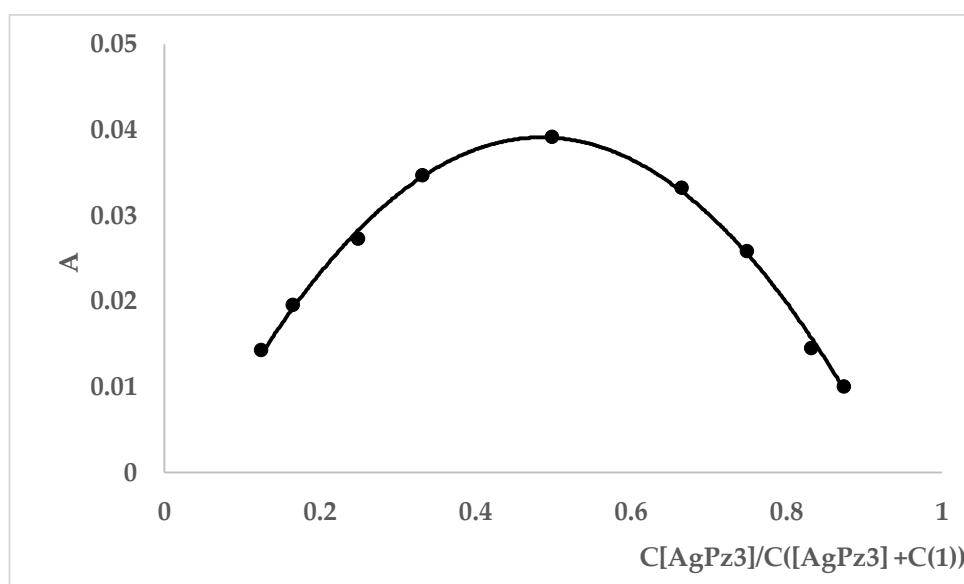

Figure S18. The Job's plot: dependence of the  $\nu(\text{CO})^{\text{bond}}$  band intensity of [AgPz]<sub>3</sub>\*[E-1] (1674 cm<sup>-1</sup>) on the composition of the isomolar solution of E-1 and [AgPz]<sub>3</sub>, CCl<sub>4</sub>.

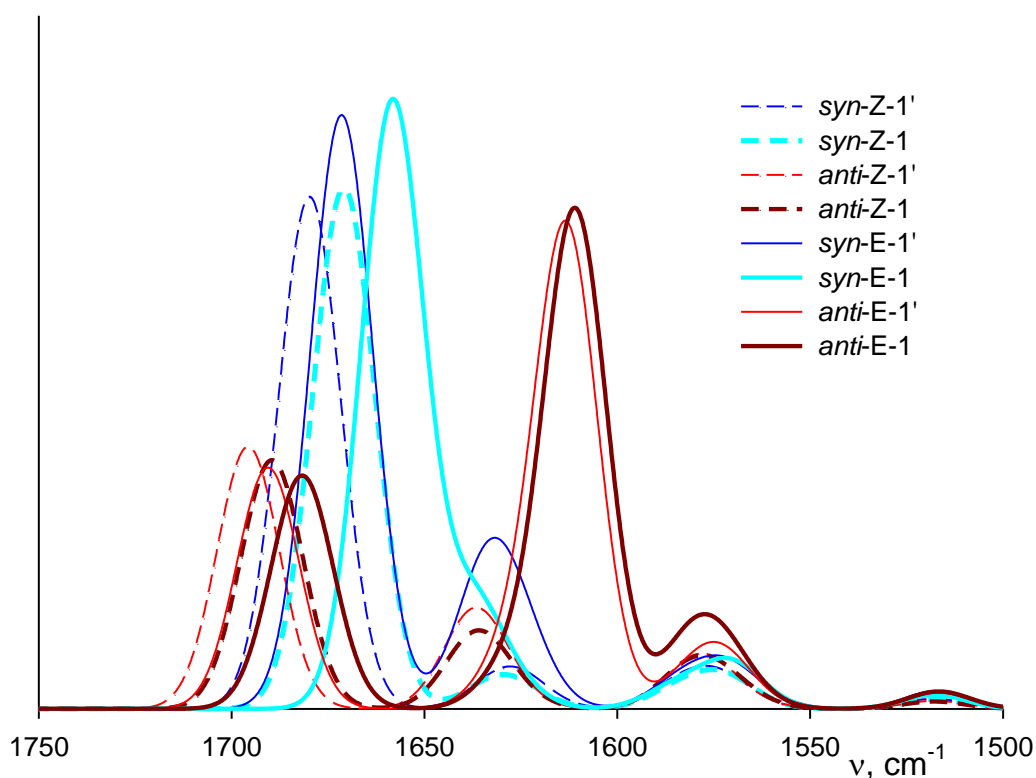

Figure S19. Simulated IR spectra for conformers of chalcone **1**. Frequencies scales by 0.950<sup>1</sup>, FWHH set to 19.

Table S2. Coordinates of all optimized species.

*syn-Z-1'* E= -978.116310954947

|   |           |          |           |   |           |          |          |
|---|-----------|----------|-----------|---|-----------|----------|----------|
| O | 6.853277  | 6.777755 | 8.641424  | H | 3.948352  | 4.951788 | 2.645088 |
| N | 5.440236  | 7.958243 | 6.534402  | C | 5.742989  | 4.392596 | 6.037291 |
| C | 5.683907  | 6.518786 | 8.451021  | H | 6.257301  | 4.210316 | 6.971144 |
| C | 4.835498  | 7.423084 | 7.594655  | C | 1.521680  | 4.883738 | 5.889644 |
| C | 3.673545  | 4.769121 | 4.783668  | C | -0.641059 | 5.034131 | 6.971500 |
| C | 5.085328  | 5.319370 | 9.091946  | H | -1.716702 | 5.153103 | 6.921686 |
| H | 5.516235  | 5.078614 | 10.058040 | C | -0.009178 | 4.880488 | 8.236118 |
| C | 3.557544  | 4.598313 | 7.221717  | H | -0.612060 | 4.885719 | 9.136446 |
| C | 4.724738  | 8.760471 | 5.756319  | C | 1.337832  | 4.733539 | 8.325444 |
| H | 5.232735  | 9.168059 | 4.888183  | H | 1.800410  | 4.633538 | 9.299638 |
| C | 3.397721  | 9.084538 | 6.007878  | C | 2.787839  | 8.549142 | 7.127278 |
| H | 2.862595  | 9.744266 | 5.337206  | H | 1.757090  | 8.781801 | 7.365163 |
| C | 3.519524  | 7.694736 | 7.936084  | C | 5.803823  | 4.641631 | 3.633921 |
| H | 3.075910  | 7.243490 | 8.813983  | H | 6.390110  | 4.667255 | 2.723305 |
| C | 4.191749  | 4.488975 | 8.554373  | C | 6.451745  | 4.422848 | 4.881188 |
| H | 3.895725  | 3.632219 | 9.154568  | H | 7.524425  | 4.272683 | 4.904368 |
| C | 4.324431  | 4.587744 | 6.044851  |   |           |          |          |
| C | 2.158950  | 4.718864 | 7.154894  |   |           |          |          |
| C | 0.102885  | 5.037719 | 5.837482  |   |           |          |          |
| H | -0.364685 | 5.161645 | 4.866961  |   |           |          |          |
| C | 2.294201  | 4.916746 | 4.734165  |   |           |          |          |
| H | 1.809603  | 5.059557 | 3.773920  |   |           |          |          |
| C | 4.459179  | 4.800984 | 3.589581  |   |           |          |          |

*syn-Z-1* E=-978.117679404354

|   |           |           |           |
|---|-----------|-----------|-----------|
| O | 0.458939  | -2.332467 | -1.597042 |
| N | 1.387223  | 0.963937  | -1.221912 |
| C | 0.690995  | -1.336656 | -0.940532 |
| C | 0.509409  | 0.022034  | -1.558243 |
| C | -2.193227 | 1.594571  | 0.942807  |
| C | 1.151810  | -1.474084 | 0.463687  |
| H | 1.755852  | -2.357789 | 0.640667  |
| C | -0.082836 | 0.476436  | 1.477111  |
| C | 1.236323  | 2.167951  | -1.763128 |
| H | 1.969988  | 2.916596  | -1.482124 |
| C | 0.201773  | 2.486952  | -2.630740 |
| H | 0.114125  | 3.491516  | -3.024107 |
| C | -0.538765 | 0.231363  | -2.442598 |
| H | -1.216482 | -0.577873 | -2.679857 |
| C | 0.794731  | -0.714379 | 1.498603  |
| H | 1.186770  | -0.998543 | 2.471880  |
| C | -1.410696 | 0.399309  | 1.026540  |
| C | 0.444639  | 1.702961  | 1.916413  |
| C | 0.194439  | 4.123779  | 2.296631  |
| H | -0.431328 | 5.008327  | 2.251720  |
| C | -1.652954 | 2.803235  | 1.359800  |
| H | -2.252832 | 3.705067  | 1.294135  |
| C | -3.522669 | 1.524289  | 0.420654  |
| H | -4.092749 | 2.443971  | 0.349652  |
| C | -2.035234 | -0.830602 | 0.639891  |
| H | -1.486635 | -1.757374 | 0.740927  |
| C | -0.357996 | 2.880948  | 1.860551  |
| C | 1.469311  | 4.197783  | 2.753377  |
| H | 1.879179  | 5.144173  | 3.085219  |
| C | 2.279862  | 3.029820  | 2.791805  |
| H | 3.301389  | 3.103139  | 3.145501  |
| C | 1.789693  | 1.830894  | 2.384009  |
| H | 2.429352  | 0.957478  | 2.403849  |
| C | -0.702742 | 1.497357  | -2.977605 |
| H | -1.522613 | 1.708104  | -3.653272 |
| C | -4.057916 | 0.342819  | 0.028863  |
| H | -5.065171 | 0.300662  | -0.367628 |
| C | -3.302156 | -0.856014 | 0.156332  |
| H | -3.748985 | -1.800042 | -0.131936 |

*anti-Z-1'* E= -978.111588000679

|   |           |          |           |
|---|-----------|----------|-----------|
| O | 4.747352  | 7.370865 | 8.250632  |
| N | 7.306648  | 8.167610 | 8.823360  |
| C | 5.513867  | 6.553536 | 8.708363  |
| C | 6.979432  | 6.874702 | 8.868249  |
| C | 3.657063  | 5.154290 | 4.740336  |
| C | 5.058727  | 5.202387 | 9.135877  |
| H | 5.488435  | 4.804995 | 10.048951 |
| C | 3.549699  | 4.817861 | 7.160814  |
| C | 8.588221  | 8.486840 | 8.923656  |
| H | 8.825182  | 9.545712 | 8.893419  |
| C | 9.603363  | 7.546081 | 9.058822  |
| H | 10.634794 | 7.866814 | 9.128793  |
| C | 7.919868  | 5.864549 | 9.009796  |
| H | 7.616750  | 4.825807 | 9.035525  |
| C | 4.178966  | 4.470685 | 8.458375  |
| H | 3.893171  | 3.510071 | 8.880718  |
| C | 4.302823  | 4.838104 | 5.977022  |
| C | 2.172024  | 5.080108 | 7.128143  |
| C | 0.132864  | 5.648742 | 5.871147  |
| H | -0.336761 | 5.872857 | 4.919739  |
| C | 2.293374  | 5.416629 | 4.721218  |
| H | 1.810201  | 5.652801 | 3.778846  |
| C | 4.431745  | 5.191839 | 3.539101  |
| H | 3.925826  | 5.439464 | 2.612442  |
| C | 5.703931  | 4.544977 | 5.940561  |
| H | 6.209532  | 4.272224 | 6.857310  |
| C | 1.536233  | 5.381128 | 5.886363  |
| C | -0.594157 | 5.625078 | 7.015724  |
| H | -1.657970 | 5.829011 | 6.993119  |
| C | 0.038894  | 5.340346 | 8.257519  |
| H | -0.550691 | 5.336877 | 9.166630  |
| C | 1.370075  | 5.080650 | 8.312446  |
| H | 1.839683  | 4.880327 | 9.267923  |
| C | 9.260613  | 6.209053 | 9.099761  |
| H | 10.018910 | 5.442746 | 9.203029  |
| C | 5.760152  | 4.924755 | 3.554704  |
| H | 6.337234  | 4.956180 | 2.638326  |
| C | 6.403416  | 4.590500 | 4.779013  |
| H | 7.463020  | 4.363874 | 4.778883  |

*anti-Z-1* E= -978.115303067927

|   |           |           |           |
|---|-----------|-----------|-----------|
| O | 1.600760  | 0.009100  | -1.296322 |
| N | 0.962296  | -3.440687 | -1.003810 |
| C | 1.482861  | -1.087378 | -0.792105 |
| C | 1.136044  | -2.280964 | -1.637578 |
| C | -1.926462 | 1.488806  | 0.431116  |
| C | 1.658437  | -1.310148 | 0.668242  |
| H | 2.253889  | -2.164847 | 0.964675  |
| C | 0.169353  | 0.590312  | 1.319894  |
| C | 0.619230  | -4.497730 | -1.729794 |
| H | 0.484405  | -5.430224 | -1.191620 |
| C | 0.433778  | -4.446389 | -3.104586 |
| H | 0.150549  | -5.339159 | -3.647212 |
| C | 0.976290  | -2.129693 | -3.007253 |
| H | 1.125226  | -1.159510 | -3.461544 |
| C | 1.089619  | -0.540447 | 1.591080  |
| H | 1.294886  | -0.762279 | 2.635199  |
| C | -1.083243 | 0.371383  | 0.723968  |
| C | 0.566010  | 1.888612  | 1.673920  |
| C | 0.137352  | 4.312678  | 1.737724  |
| H | -0.522236 | 5.142840  | 1.510066  |
| C | -1.511037 | 2.771790  | 0.763683  |
| H | -2.153474 | 3.615287  | 0.533014  |
| C | -3.186428 | 1.264053  | -0.206495 |
| H | -3.807284 | 2.124427  | -0.430668 |
| C | -1.570477 | -0.934343 | 0.393329  |
| H | -0.968710 | -1.799981 | 0.636803  |
| C | -0.289621 | 2.994803  | 1.388381  |
| C | 1.335704  | 4.521666  | 2.336903  |
| H | 1.648974  | 5.525044  | 2.599280  |
| C | 2.192931  | 3.422063  | 2.620379  |
| H | 3.150541  | 3.601961  | 3.094500  |
| C | 1.826434  | 2.156224  | 2.295055  |
| H | 2.498594  | 1.332930  | 2.503745  |
| C | 0.617464  | -3.238197 | -3.754908 |
| H | 0.480121  | -3.158565 | -4.826328 |
| C | -3.597008 | 0.011771  | -0.522399 |
| H | -4.553864 | -0.145889 | -1.005492 |
| C | -2.775314 | -1.106024 | -0.206371 |
| H | -3.120140 | -2.105609 | -0.443241 |

*syn-E-1'* E= -978.114299489491

|   |           |           |           |
|---|-----------|-----------|-----------|
| O | 2.715734  | 2.687880  | 1.169455  |
| N | 4.204148  | 1.225322  | -0.762750 |
| C | 2.342393  | 1.623722  | 0.719345  |
| C | 3.343361  | 0.680716  | 0.097044  |
| C | -3.450247 | 0.548853  | -0.121556 |
| C | 0.921752  | 1.233968  | 0.787466  |
| H | 0.335049  | 1.771125  | 1.524797  |
| C | -1.064641 | -0.003435 | -0.087535 |
| C | 5.132927  | 0.435262  | -1.288449 |
| H | 5.810993  | 0.898430  | -1.998150 |
| C | 5.264165  | -0.909408 | -0.968322 |
| H | 6.048991  | -1.500405 | -1.422384 |
| C | 3.386752  | -0.653784 | 0.474344  |
| H | 2.670102  | -1.045839 | 1.184649  |
| C | 0.362463  | 0.363345  | -0.053595 |
| H | 1.000408  | -0.139276 | -0.775061 |
| C | -2.082350 | 0.969045  | -0.124373 |
| C | -1.392942 | -1.373439 | -0.101722 |
| C | -3.087355 | -3.165089 | -0.120768 |
| H | -4.134360 | -3.447072 | -0.132089 |
| C | -3.757880 | -0.804883 | -0.112160 |
| H | -4.798577 | -1.112199 | -0.109356 |
| C | -4.488443 | 1.531522  | -0.139237 |
| H | -5.516770 | 1.187944  | -0.120894 |
| C | -1.827148 | 2.376039  | -0.209205 |
| H | -0.807150 | 2.727700  | -0.267292 |
| C | -2.762430 | -1.774165 | -0.114877 |
| C | -2.113894 | -4.108510 | -0.111210 |
| H | -2.368664 | -5.161418 | -0.117450 |
| C | -0.747764 | -3.716103 | -0.086065 |
| H | 0.023655  | -4.476783 | -0.070195 |
| C | -0.400204 | -2.403522 | -0.074181 |
| H | 0.648366  | -2.137643 | -0.038965 |
| C | 4.377140  | -1.461233 | -0.062108 |
| H | 4.448782  | -2.503899 | 0.222282  |
| C | -4.197721 | 2.853630  | -0.186367 |
| H | -4.991106 | 3.591019  | -0.201123 |
| C | -2.841012 | 3.277241  | -0.237120 |
| H | -2.616706 | 4.334912  | -0.307699 |

*syn*-E-1 E= -978.116260465452

|   |           |           |           |
|---|-----------|-----------|-----------|
| O | 2.681561  | 2.480427  | 1.632267  |
| N | 3.302423  | -0.615907 | 0.225895  |
| C | 2.353138  | 1.488049  | 1.008225  |
| C | 3.407911  | 0.712380  | 0.261914  |
| C | -3.398131 | 0.544530  | -0.184346 |
| C | 0.938868  | 1.077530  | 0.974451  |
| H | 0.322183  | 1.553460  | 1.730298  |
| C | -1.032912 | -0.061276 | -0.020711 |
| C | 4.261396  | -1.296415 | -0.393729 |
| H | 4.157243  | -2.376574 | -0.396933 |
| C | 5.343931  | -0.692283 | -1.015425 |
| H | 6.089582  | -1.296497 | -1.515943 |
| C | 4.460706  | 1.406686  | -0.318506 |
| H | 4.497674  | 2.485774  | -0.251268 |
| C | 0.401482  | 0.278024  | 0.054368  |
| H | 1.049114  | -0.185862 | -0.681872 |
| C | -2.021372 | 0.931717  | -0.138201 |
| C | -1.392316 | -1.420600 | 0.010433  |
| C | -3.122314 | -3.174256 | 0.005328  |
| H | -4.173467 | -3.437702 | -0.035046 |
| C | -3.740056 | -0.800230 | -0.129572 |
| H | -4.787192 | -1.083245 | -0.160682 |
| C | -4.405766 | 1.552753  | -0.297405 |
| H | -5.443374 | 1.238406  | -0.318987 |
| C | -1.721212 | 2.327448  | -0.255757 |
| H | -0.688463 | 2.646913  | -0.262845 |
| C | -2.769112 | -1.790988 | -0.041905 |
| C | -2.168967 | -4.133679 | 0.101574  |
| H | -2.446061 | -5.180459 | 0.136481  |
| C | -0.795831 | -3.768734 | 0.164654  |
| H | -0.043587 | -4.543509 | 0.253431  |
| C | -0.420651 | -2.464395 | 0.126881  |
| H | 0.629979  | -2.209366 | 0.196498  |
| C | 5.442096  | 0.688303  | -0.979192 |
| H | 6.271166  | 1.197352  | -1.455343 |
| C | -4.075298 | 2.863690  | -0.384059 |
| H | -4.845787 | 3.619765  | -0.475372 |
| C | -2.706701 | 3.252292  | -0.373212 |
| H | -2.451223 | 4.301107  | -0.467037 |

*anti*-E-1' E= -978.114505543693

|   |           |           |           |
|---|-----------|-----------|-----------|
| O | 2.459365  | 1.925789  | -1.370075 |
| N | 4.674743  | 1.397618  | 0.213478  |
| C | 2.417548  | 1.030740  | -0.552052 |
| C | 3.691291  | 0.509122  | 0.064122  |
| C | -3.643635 | 0.584066  | 0.334321  |
| C | 1.148911  | 0.404242  | -0.115558 |
| H | 1.180344  | -0.284622 | 0.719679  |
| C | -1.321097 | 0.164816  | -0.331469 |
| C | 5.824089  | 0.969978  | 0.718208  |
| H | 6.600098  | 1.717649  | 0.848713  |
| C | 6.060207  | -0.353763 | 1.067948  |
| H | 7.023884  | -0.649064 | 1.462441  |
| C | 3.824579  | -0.830778 | 0.400313  |
| H | 3.005268  | -1.523626 | 0.256955  |
| C | -0.004393 | 0.707001  | -0.709655 |
| H | 0.023334  | 1.433432  | -1.517956 |
| C | -2.362042 | 1.072543  | -0.059807 |
| C | -1.550762 | -1.221548 | -0.251050 |
| C | -3.070385 | -3.101423 | 0.255704  |
| H | -4.048363 | -3.436270 | 0.583210  |
| C | -3.848605 | -0.785981 | 0.444125  |
| H | -4.820027 | -1.154587 | 0.757026  |
| C | -4.689944 | 1.513939  | 0.618905  |
| H | -5.656514 | 1.123370  | 0.917138  |
| C | -2.181181 | 2.489922  | -0.131660 |
| H | -1.213122 | 2.891608  | -0.402654 |
| C | -2.838166 | -1.694092 | 0.157237  |
| C | -2.100479 | -3.993366 | -0.058677 |
| H | -2.286553 | -5.057881 | 0.016944  |
| C | -0.832635 | -3.530696 | -0.508191 |
| H | -0.072570 | -4.250809 | -0.787114 |
| C | -0.567928 | -2.203230 | -0.600879 |
| H | 0.397609  | -1.877818 | -0.961848 |
| C | 5.041607  | -1.272148 | 0.897485  |
| H | 5.186576  | -2.315588 | 1.148761  |
| C | -4.479932 | 2.850033  | 0.523719  |
| H | -5.278700 | 3.548871  | 0.740983  |
| C | -3.201671 | 3.342504  | 0.142371  |
| H | -3.042407 | 4.412194  | 0.075877  |

*anti-E-1* E= -978.118736495489

|   |           |           |           |
|---|-----------|-----------|-----------|
| O | 2.464032  | 1.780112  | -1.597164 |
| N | 3.613440  | -0.391400 | 0.936691  |
| C | 2.427803  | 0.942601  | -0.715711 |
| C | 3.703067  | 0.520608  | -0.031880 |
| C | -3.586926 | 0.544881  | 0.405830  |
| C | 1.171526  | 0.307552  | -0.266393 |
| H | 1.240703  | -0.433461 | 0.517490  |
| C | -1.308630 | 0.123196  | -0.398904 |
| C | 4.732538  | -0.766435 | 1.544127  |
| H | 4.628300  | -1.509111 | 2.328440  |
| C | 5.981456  | -0.257878 | 1.216801  |
| H | 6.862198  | -0.600556 | 1.744463  |
| C | 4.907165  | 1.085720  | -0.430326 |
| H | 4.918181  | 1.819471  | -1.224632 |
| C | 0.002643  | 0.665014  | -0.797139 |
| H | 0.010016  | 1.443878  | -1.555436 |
| C | -2.316751 | 1.032009  | -0.025664 |
| C | -1.564125 | -1.260932 | -0.387287 |
| C | -3.096251 | -3.139574 | 0.083702  |
| H | -4.064026 | -3.476237 | 0.438698  |
| C | -3.814965 | -0.825325 | 0.448104  |
| H | -4.776687 | -1.194017 | 0.789722  |
| C | -4.596758 | 1.476009  | 0.798442  |
| H | -5.554326 | 1.086513  | 1.125847  |
| C | -2.111074 | 2.447834  | -0.028615 |
| H | -1.150807 | 2.846708  | -0.329448 |
| C | -2.839908 | -1.733277 | 0.056201  |
| C | -2.160701 | -4.028294 | -0.329310 |
| H | -2.365134 | -5.091962 | -0.306854 |
| C | -0.905916 | -3.562781 | -0.811585 |
| H | -0.174538 | -4.279169 | -1.166392 |
| C | -0.618847 | -2.236965 | -0.840640 |
| H | 0.335660  | -1.907023 | -1.225586 |
| C | 6.068738  | 0.686381  | 0.208075  |
| H | 7.026242  | 1.103270  | -0.079191 |
| C | -4.364479 | 2.811484  | 0.766226  |
| H | -5.136217 | 3.510899  | 1.064234  |
| C | -3.098102 | 3.302084  | 0.344585  |
| H | -2.920693 | 4.370858  | 0.327726  |
