# Supplementary material for: Exploring the Interaction of Pyridine-Based Chalcones with Trinuclear Silver(I) Pyrazolate Complex
Source: MDPI journal article supplement (doi:10.3390/inorganics11040175), 2023-04-21
Supplement: s1 [file s1 › z-1Ag.cif]

data_a
_audit_creation_date               2023-03-30
_audit_creation_method
;
Olex2 1.5
(compiled 2022.04.07 svn.rca3783a0 for OlexSys, GUI svn.r6498)
;
_shelx_SHELXL_version_number       '2018/3'
_audit_contact_author_address      ?
_audit_contact_author_email        ?
_audit_contact_author_name         ''
_audit_contact_author_phone        ?
_publ_contact_author_id_orcid      ?
_publ_section_references
;
Dolomanov, O.V., Bourhis, L.J., Gildea, R.J, Howard, J.A.K. & Puschmann, H.
 (2009), J. Appl. Cryst. 42, 339-341.

Sheldrick, G.M. (2008). Acta Cryst. A64, 112-122.

Sheldrick, G.M. (2015). Acta Cryst. A71, 3-8.
;
_chemical_name_common              ?
_chemical_name_systematic          ?
_chemical_formula_moiety           'C37 H18 Ag3 F18 N7 O'
_chemical_formula_sum              'C37 H18 Ag3 F18 N7 O'
_chemical_formula_weight           1242.19
_chemical_melting_point            ?
loop_
  _atom_type_symbol
  _atom_type_description
  _atom_type_scat_dispersion_real
  _atom_type_scat_dispersion_imag
  _atom_type_scat_source
 'C' 'C' 0.0033 0.0016 'International Tables Vol C Tables 4.2.6.8 and 6.1.1.4'
 'H' 'H' 0.0000 0.0000 'International Tables Vol C Tables 4.2.6.8 and 6.1.1.4'
 'Ag' 'Ag' -0.8971 1.1015
 'International Tables Vol C Tables 4.2.6.8 and 6.1.1.4'
 'F' 'F' 0.0171 0.0103 'International Tables Vol C Tables 4.2.6.8 and 6.1.1.4'
 'N' 'N' 0.0061 0.0033 'International Tables Vol C Tables 4.2.6.8 and 6.1.1.4'
 'O' 'O' 0.0106 0.0060 'International Tables Vol C Tables 4.2.6.8 and 6.1.1.4'

_shelx_space_group_comment
;
The symmetry employed for this shelxl refinement is uniquely defined
by the following loop, which should always be used as a source of
symmetry information in preference to the above space-group names.
They are only intended as comments.
;
_space_group_crystal_system        'monoclinic'
_space_group_IT_number             14
_space_group_name_H-M_alt          'P 1 21/n 1'
_space_group_name_Hall             '-P 2yn'
loop_
  _space_group_symop_operation_xyz
 'x, y, z'
 '-x+1/2, y+1/2, -z+1/2'
 '-x, -y, -z'
 'x-1/2, -y-1/2, z-1/2'

_cell_length_a                     13.1222(8)
_cell_length_b                     14.3897(10)
_cell_length_c                     20.6671(14)
_cell_angle_alpha                  90
_cell_angle_beta                   91.486(3)
_cell_angle_gamma                  90
_cell_volume                       3901.1(4)
_cell_formula_units_Z              4
_cell_measurement_reflns_used      9746
_cell_measurement_temperature      100
_cell_measurement_theta_max        29.78
_cell_measurement_theta_min        2.30
_shelx_estimated_absorpt_T_max     ?
_shelx_estimated_absorpt_T_min     ?
_exptl_absorpt_coefficient_mu      1.621
_exptl_absorpt_correction_T_max    0.3803
_exptl_absorpt_correction_T_min    0.2453
_exptl_absorpt_correction_type     multi-scan
_exptl_absorpt_process_details
;
SADABS-2016/2 (Bruker,2016/2) was used for absorption correction.
wR2(int) was 0.1565 before and 0.0692 after correction.
The Ratio of minimum to maximum transmission is 0.6450.
The \l/2 correction factor is Not present.
;
_exptl_absorpt_special_details     ?
_exptl_crystal_colour              colourless
_exptl_crystal_colour_primary      colourless
_exptl_crystal_density_diffrn      2.115
_exptl_crystal_density_meas        ?
_exptl_crystal_density_method      ?
_exptl_crystal_description         prism
_exptl_crystal_F_000               2400
_exptl_crystal_size_max            0.21
_exptl_crystal_size_mid            0.15
_exptl_crystal_size_min            0.11
_exptl_transmission_factor_max     ?
_exptl_transmission_factor_min     ?
_diffrn_reflns_av_R_equivalents    0.0415
_diffrn_reflns_av_unetI/netI       0.0295
_diffrn_reflns_Laue_measured_fraction_full  0.993
_diffrn_reflns_Laue_measured_fraction_max  0.994
_diffrn_reflns_limit_h_max         16
_diffrn_reflns_limit_h_min         -16
_diffrn_reflns_limit_k_max         17
_diffrn_reflns_limit_k_min         -17
_diffrn_reflns_limit_l_max         25
_diffrn_reflns_limit_l_min         -20
_diffrn_reflns_number              44445
_diffrn_reflns_point_group_measured_fraction_full  0.993
_diffrn_reflns_point_group_measured_fraction_max  0.994
_diffrn_reflns_theta_full          25.242
_diffrn_reflns_theta_max           25.998
_diffrn_reflns_theta_min           1.860
_diffrn_ambient_temperature        100
_diffrn_detector_area_resol_mean   ?
_diffrn_measured_fraction_theta_full  0.993
_diffrn_measured_fraction_theta_max  0.994
_diffrn_measurement_device_type    'Bruker APEX-II CCD'
_diffrn_measurement_method         '\f and \w scans'
_diffrn_radiation_type             MoK\a
_diffrn_radiation_wavelength       0.71073
_diffrn_source                     ?
_diffrn_standards_number           0
_reflns_Friedel_coverage           0.000
_reflns_Friedel_fraction_full      .
_reflns_Friedel_fraction_max       .
_reflns_number_gt                  7068
_reflns_number_total               7611
_reflns_special_details
;
 Reflections were merged by SHELXL according to the crystal
 class for the calculation of statistics and refinement.
 
 _reflns_Friedel_fraction is defined as the number of unique
 Friedel pairs measured divided by the number that would be
 possible theoretically, ignoring centric projections and
 systematic absences.
;
_reflns_threshold_expression       'I > 2\s(I)'
_computing_cell_refinement         'SAINT V8.40A (Bruker, 2019)'
_computing_data_collection         ?
_computing_data_reduction          'SAINT V8.40A (Bruker, 2019)'
_computing_molecular_graphics      'Olex2 1.5 (Dolomanov et al., 2009)'
_computing_publication_material    'Olex2 1.5 (Dolomanov et al., 2009)'
_computing_structure_refinement    'XL  (Sheldrick, 2008)'
_computing_structure_solution      'SHELXT 2014/5 (Sheldrick, 2014)'
_refine_diff_density_max           1.549
_refine_diff_density_min           -0.900
_refine_diff_density_rms           0.131
_refine_ls_extinction_coef         .
_refine_ls_extinction_method       none
_refine_ls_goodness_of_fit_ref     1.151
_refine_ls_hydrogen_treatment      constr
_refine_ls_matrix_type             full
_refine_ls_number_parameters       604
_refine_ls_number_reflns           7611
_refine_ls_number_restraints       6
_refine_ls_R_factor_all            0.0462
_refine_ls_R_factor_gt             0.0424
_refine_ls_restrained_S_all        1.151
_refine_ls_shift/su_max            0.001
_refine_ls_shift/su_mean           0.000
_refine_ls_structure_factor_coef   Fsqd
_refine_ls_weighting_details      
 'w=1/[\s^2^(Fo^2^)+(0.0001P)^2^+30.5271P] where P=(Fo^2^+2Fc^2^)/3'
_refine_ls_weighting_scheme        calc
_refine_ls_wR_factor_gt            0.0955
_refine_ls_wR_factor_ref           0.0978
_refine_special_details            ?
_olex2_refinement_description
;
1. Fixed Uiso
 At 1.2 times of:
  All C(H) groups
2. Uiso/Uaniso restraints and constraints
Uanis(Ag4) \\sim Ueq: with sigma of 0.001 and sigma for terminal atoms of 0.002
3. Others
 Fixed Sof: Ag1(0.95) Ag4(0.05)
4.a Aromatic/amide H refined with riding coordinates:
 C00T(H00T), C00Z(H00Z), C015(H015), C019(H019), C01A(H01A), C01B(H01B),
 C01C(H01C), C01D(H01D), C01J(H01J), C01K(H01K), C01L(H01L), C01M(H01M),
 C01O(H01O), C01P(H01P), C01Q(H01Q), C01R(H01R), C01T(H01T), C01U(H01U)
;
_atom_sites_solution_hydrogens     geom
_atom_sites_solution_primary       dual
_atom_sites_solution_secondary     ?
loop_
  _atom_site_label
  _atom_site_type_symbol
  _atom_site_fract_x
  _atom_site_fract_y
  _atom_site_fract_z
  _atom_site_U_iso_or_equiv
  _atom_site_adp_type
  _atom_site_occupancy
  _atom_site_site_symmetry_order
  _atom_site_calc_flag
  _atom_site_refinement_flags_posn
  _atom_site_refinement_flags_adp
  _atom_site_refinement_flags_occupancy
  _atom_site_disorder_assembly
  _atom_site_disorder_group
 Ag2 Ag 0.31413(3) 0.62481(3) 0.21240(2) 0.02007(10) Uani 1 1 d . . . . .
 Ag3 Ag 0.29248(3) 0.69519(3) 0.36851(2) 0.02150(10) Uani 1 1 d . . . . .
 Ag1 Ag 0.53033(3) 0.63747(3) 0.31596(2) 0.01928(10) Uani 0.95 1 d . . P A 1
 F004 F 0.3965(2) 0.5122(2) 0.03560(15) 0.0329(7) Uani 1 1 d . . . . .
 F005 F 0.3246(2) 0.6362(3) 0.06875(14) 0.0329(7) Uani 1 1 d . . . . .
 F006 F 0.0846(2) 0.7094(2) 0.43324(14) 0.0324(7) Uani 1 1 d . . . . .
 F007 F 0.4511(3) 0.6444(3) 0.00426(14) 0.0359(8) Uani 1 1 d . . . . .
 F008 F -0.0063(3) 0.5128(3) 0.15186(17) 0.0418(9) Uani 1 1 d . . . . .
 F009 F -0.0654(2) 0.6655(3) 0.40326(17) 0.0426(9) Uani 1 1 d . . . . .
 F00A F 0.0449(3) 0.5658(2) 0.43789(16) 0.0387(8) Uani 1 1 d . . . . .
 N2 N 0.4574(3) 0.6165(3) 0.17240(18) 0.0181(8) Uani 1 1 d . . . . .
 F00C F 0.7397(3) 0.7527(3) 0.4394(2) 0.0482(10) Uani 1 1 d . . . . .
 O00D O 0.4140(3) 0.5230(3) 0.37856(17) 0.0270(8) Uani 1 1 d . . . . .
 N4 N 0.1643(3) 0.6398(3) 0.31885(19) 0.0195(8) Uani 1 1 d . . . . .
 F00F F 0.0173(4) 0.6553(3) 0.13098(18) 0.0548(11) Uani 1 1 d . . . . .
 F00G F 0.1430(3) 0.5588(4) 0.13041(17) 0.0577(12) Uani 1 1 d . . . . .
 F00H F 0.7004(3) 0.7939(4) 0.34338(17) 0.0588(12) Uani 1 1 d . . . . .
 F00I F 0.7238(3) 0.8964(3) 0.4182(2) 0.0552(11) Uani 1 1 d . . . . .
 F00J F 0.7946(3) 0.5773(4) 0.16430(18) 0.0714(16) Uani 1 1 d . . . . .
 N3 N 0.1719(3) 0.6226(3) 0.25463(19) 0.0215(9) Uani 1 1 d . . . . .
 N1 N 0.5402(3) 0.6119(3) 0.21292(19) 0.0218(9) Uani 1 1 d . . . . .
 F00M F 0.3445(4) 0.9350(3) 0.5256(2) 0.0620(13) Uani 1 1 d . . . . .
 N5 N 0.4174(3) 0.7606(3) 0.41551(19) 0.0199(8) Uani 1 1 d . . . . .
 F00O F 0.3303(3) 0.7966(3) 0.5561(2) 0.0586(11) Uani 1 1 d . . . . .
 N6 N 0.5104(3) 0.7507(3) 0.38921(19) 0.0204(8) Uani 1 1 d . . . . .
 F00Q F 0.2475(3) 0.8366(4) 0.4740(2) 0.0703(15) Uani 1 1 d . . . . .
 F00R F 0.7463(3) 0.6522(4) 0.2484(2) 0.0683(14) Uani 1 1 d . . . . .
 N00S N 0.6212(3) 0.5366(3) 0.3898(2) 0.0242(9) Uani 1 1 d . . . . .
 C00T C 0.5242(4) 0.8584(4) 0.4675(2) 0.0253(11) Uani 1 1 d . . . . .
 H00T H 0.550671 0.902720 0.496029 0.030 Uiso 1 1 calc R U . . .
 F00U F 0.7318(3) 0.5066(4) 0.2443(2) 0.0734(15) Uani 1 1 d . . . . .
 C00V C 0.4588(4) 0.4643(4) 0.4111(2) 0.0251(11) Uani 1 1 d . . . . .
 C00W C 0.5725(4) 0.4700(4) 0.4232(2) 0.0248(11) Uani 1 1 d . . . . .
 C00X C 0.0666(4) 0.6296(4) 0.3343(2) 0.0227(10) Uani 1 1 d . . . . .
 C00Y C 0.5743(4) 0.8094(4) 0.4205(2) 0.0221(10) Uani 1 1 d . . . . .
 C00Z C 0.0086(4) 0.6046(4) 0.2802(3) 0.0267(11) Uani 1 1 d . . . . .
 H00Z H -0.061031 0.592842 0.277284 0.032 Uiso 1 1 calc R U . . .
 C010 C 0.0787(4) 0.6011(4) 0.2317(2) 0.0230(10) Uani 1 1 d . . . . .
 C011 C 0.4155(4) 0.5988(4) 0.0556(2) 0.0213(10) Uani 1 1 d . . . . .
 C012 C 0.4261(4) 0.8260(4) 0.4621(2) 0.0228(10) Uani 1 1 d . . . . .
 C013 C 0.4885(4) 0.6024(4) 0.1116(2) 0.0212(10) Uani 1 1 d . . . . .
 C014 C 0.2780(7) 0.3750(4) 0.2298(3) 0.0480(19) Uani 1 1 d . . . . .
 C015 C 0.4044(4) 0.3847(4) 0.4398(3) 0.0290(12) Uani 1 1 d . . . . .
 H015 H 0.426473 0.365529 0.480782 0.035 Uiso 1 1 calc R U . . .
 C016 C 0.0328(4) 0.6424(4) 0.4016(3) 0.0258(11) Uani 1 1 d . . . . .
 C017 C 0.6839(4) 0.8139(4) 0.4045(3) 0.0297(12) Uani 1 1 d . . . . .
 C018 C 0.2770(5) 0.3509(4) 0.3480(3) 0.0336(13) Uani 1 1 d . . . . .
 C019 C 0.7213(4) 0.5441(4) 0.3988(3) 0.0283(11) Uani 1 1 d . . . . .
 H019 H 0.755448 0.589089 0.375389 0.034 Uiso 1 1 calc R U . . .
 C01A C 0.5925(4) 0.5886(4) 0.1116(2) 0.0300(12) Uani 1 1 d . . . . .
 H01A H 0.633674 0.577662 0.076416 0.036 Uiso 1 1 calc R U . . .
 C01B C 0.7777(4) 0.4885(5) 0.4411(3) 0.0355(13) Uani 1 1 d . . . . .
 H01B H 0.847554 0.497274 0.446843 0.043 Uiso 1 1 calc R U . . .
 C01C C 0.6239(5) 0.4113(4) 0.4652(3) 0.0372(14) Uani 1 1 d . . . . .
 H01C H 0.588729 0.365808 0.487504 0.045 Uiso 1 1 calc R U . . .
 C01D C 0.3268(5) 0.3379(4) 0.4125(3) 0.0341(13) Uani 1 1 d . . . . .
 H01D H 0.300146 0.290508 0.437521 0.041 Uiso 1 1 calc R U . . .
 C01E C 0.3342(6) 0.3584(4) 0.2910(3) 0.0402(15) Uani 1 1 d . . . . .
 C01F C 0.1689(5) 0.3523(4) 0.3450(3) 0.0363(14) Uani 1 1 d . . . . .
 C01G C 0.0583(4) 0.5824(4) 0.1612(3) 0.0318(12) Uani 1 1 d . . . . .
 C01H C 0.3370(4) 0.8508(5) 0.5022(3) 0.0359(14) Uani 1 1 d . . . . .
 C01I C 0.6211(4) 0.5949(4) 0.1768(3) 0.0280(12) Uani 1 1 d . . . . .
 C01J C 0.0065(6) 0.3581(5) 0.2812(4) 0.0504(19) Uani 1 1 d . . . . .
 H01J H -0.027807 0.362743 0.241379 0.060 Uiso 1 1 calc R U . . .
 C01K C 0.1723(7) 0.3747(4) 0.2292(3) 0.0496(18) Uani 1 1 d . . . . .
 H01K H 0.137694 0.383594 0.189828 0.060 Uiso 1 1 calc R U . . .
 C01L C 0.3365(8) 0.3892(5) 0.1736(3) 0.058(2) Uani 1 1 d . . . . .
 H01L H 0.303112 0.404390 0.134788 0.069 Uiso 1 1 calc R U . . .
 C01M C 0.4403(6) 0.3483(4) 0.2892(3) 0.0445(17) Uani 1 1 d . . . . .
 H01M H 0.476020 0.333562 0.327297 0.053 Uiso 1 1 calc R U . . .
 C01N C 0.1162(6) 0.3622(4) 0.2831(3) 0.0463(17) Uani 1 1 d . . . . .
 C01O C -0.0477(6) 0.3479(5) 0.3345(4) 0.0520(18) Uani 1 1 d . . . . .
 H01O H -0.118467 0.344963 0.331641 0.062 Uiso 1 1 calc R U . . .
 C01P C 0.0037(5) 0.3415(5) 0.3955(4) 0.0459(16) Uani 1 1 d . . . . .
 H01P H -0.033660 0.335221 0.432905 0.055 Uiso 1 1 calc R U . . .
 C01Q C 0.1081(5) 0.3444(4) 0.4000(3) 0.0375(14) Uani 1 1 d . . . . .
 H01Q H 0.139857 0.341120 0.440654 0.045 Uiso 1 1 calc R U . . .
 C01R C 0.7284(5) 0.4204(5) 0.4742(3) 0.0454(16) Uani 1 1 d . . . . .
 H01R H 0.764291 0.380996 0.502256 0.055 Uiso 1 1 calc R U . . .
 C01S C 0.7232(5) 0.5845(6) 0.2072(3) 0.0454(18) Uani 1 1 d . . . . .
 C01T C 0.4374(8) 0.3815(5) 0.1749(3) 0.060(2) Uani 1 1 d . . . . .
 H01T H 0.472911 0.390590 0.137028 0.072 Uiso 1 1 calc R U . . .
 C01U C 0.4929(7) 0.3592(5) 0.2340(4) 0.059(2) Uani 1 1 d . . . . .
 H01U H 0.563370 0.352357 0.234305 0.071 Uiso 1 1 calc R U . . .
 Ag4 Ag 0.5313(12) 0.6879(13) 0.2987(8) 0.069(4) Uani 0.05 1 d . U P A 2

loop_
  _atom_site_aniso_label
  _atom_site_aniso_U_11
  _atom_site_aniso_U_22
  _atom_site_aniso_U_33
  _atom_site_aniso_U_23
  _atom_site_aniso_U_13
  _atom_site_aniso_U_12
 Ag2 0.01449(17) 0.0282(2) 0.01762(17) -0.00355(14) 0.00187(13) 0.00000(14)
 Ag3 0.01710(18) 0.0277(2) 0.01961(18) -0.00577(15) -0.00085(13) -0.00217(15)
 Ag1 0.01848(19) 0.0255(2) 0.01385(17) -0.00167(16) 0.00069(13) -0.00220(15)
 F004 0.0367(18) 0.0323(18) 0.0292(16) -0.0089(14) -0.0074(14) -0.0003(14)
 F005 0.0230(15) 0.052(2) 0.0236(15) -0.0057(14) -0.0026(12) 0.0104(14)
 F006 0.0342(17) 0.0405(19) 0.0228(15) -0.0070(14) 0.0056(13) -0.0063(14)
 F007 0.0371(18) 0.051(2) 0.0197(15) 0.0103(14) -0.0001(13) -0.0035(16)
 F008 0.043(2) 0.044(2) 0.0376(19) -0.0152(16) -0.0083(16) -0.0053(16)
 F009 0.0173(15) 0.074(3) 0.0366(18) -0.0090(18) 0.0057(13) 0.0074(16)
 F00A 0.048(2) 0.037(2) 0.0319(17) 0.0057(15) 0.0083(15) -0.0001(16)
 N2 0.0153(19) 0.023(2) 0.0160(18) 0.0011(16) 0.0003(15) -0.0020(16)
 F00C 0.0252(18) 0.056(2) 0.063(2) 0.007(2) 0.0011(17) 0.0040(17)
 O00D 0.0282(19) 0.025(2) 0.0275(19) 0.0034(16) 0.0013(15) 0.0005(15)
 N4 0.0158(19) 0.023(2) 0.0199(19) -0.0054(17) 0.0021(15) 0.0012(16)
 F00F 0.088(3) 0.045(2) 0.0306(19) 0.0018(17) -0.022(2) -0.002(2)
 F00G 0.0261(18) 0.117(4) 0.0296(18) -0.022(2) 0.0020(14) -0.004(2)
 F00H 0.038(2) 0.110(4) 0.0286(18) -0.017(2) 0.0099(15) -0.022(2)
 F00I 0.041(2) 0.038(2) 0.087(3) -0.014(2) 0.011(2) -0.0210(17)
 F00J 0.0171(17) 0.165(5) 0.0321(19) -0.003(3) 0.0070(14) 0.019(2)
 N3 0.018(2) 0.028(2) 0.0188(19) -0.0047(17) -0.0018(16) -0.0010(17)
 N1 0.018(2) 0.029(2) 0.0178(19) -0.0019(17) 0.0003(16) 0.0017(17)
 F00M 0.084(3) 0.036(2) 0.068(3) -0.024(2) 0.042(2) -0.010(2)
 N5 0.020(2) 0.022(2) 0.0174(19) -0.0043(16) -0.0019(15) 0.0011(16)
 F00O 0.062(3) 0.059(3) 0.055(2) 0.009(2) 0.025(2) 0.000(2)
 N6 0.021(2) 0.023(2) 0.0164(19) -0.0010(16) -0.0008(16) -0.0016(17)
 F00Q 0.033(2) 0.121(4) 0.057(3) -0.046(3) -0.0024(18) 0.013(2)
 F00R 0.031(2) 0.113(4) 0.060(3) -0.030(3) -0.0163(19) 0.000(2)
 N00S 0.026(2) 0.025(2) 0.021(2) 0.0015(18) 0.0002(17) 0.0015(18)
 C00T 0.032(3) 0.023(3) 0.020(2) -0.003(2) -0.007(2) -0.003(2)
 F00U 0.047(3) 0.116(4) 0.056(3) 0.017(3) -0.012(2) 0.027(3)
 C00V 0.030(3) 0.026(3) 0.020(2) -0.001(2) 0.002(2) -0.002(2)
 C00W 0.029(3) 0.023(3) 0.023(2) -0.001(2) 0.004(2) 0.005(2)
 C00X 0.020(2) 0.024(3) 0.025(2) 0.000(2) 0.0041(19) 0.001(2)
 C00Y 0.023(2) 0.023(3) 0.020(2) 0.001(2) -0.0028(19) -0.004(2)
 C00Z 0.012(2) 0.039(3) 0.029(3) -0.003(2) -0.0009(19) -0.002(2)
 C010 0.019(2) 0.027(3) 0.023(2) -0.004(2) -0.0017(19) -0.001(2)
 C011 0.022(2) 0.027(3) 0.015(2) 0.0010(19) 0.0043(18) 0.002(2)
 C012 0.021(2) 0.027(3) 0.020(2) -0.004(2) -0.0045(19) 0.004(2)
 C013 0.021(2) 0.023(3) 0.019(2) -0.0009(19) 0.0032(19) -0.0011(19)
 C014 0.103(6) 0.014(3) 0.028(3) -0.001(2) 0.009(3) -0.004(3)
 C015 0.033(3) 0.029(3) 0.025(3) 0.006(2) 0.001(2) -0.002(2)
 C016 0.018(2) 0.032(3) 0.028(3) 0.001(2) 0.005(2) 0.002(2)
 C017 0.030(3) 0.034(3) 0.025(3) -0.004(2) -0.003(2) -0.009(2)
 C018 0.053(4) 0.018(3) 0.030(3) 0.000(2) -0.001(3) -0.008(2)
 C019 0.025(3) 0.033(3) 0.027(3) 0.003(2) -0.003(2) -0.003(2)
 C01A 0.018(2) 0.053(4) 0.019(2) -0.005(2) 0.0041(19) 0.004(2)
 C01B 0.024(3) 0.046(4) 0.036(3) 0.009(3) -0.002(2) 0.004(3)
 C01C 0.032(3) 0.037(3) 0.043(3) 0.017(3) 0.005(3) 0.003(3)
 C01D 0.050(4) 0.026(3) 0.027(3) 0.007(2) 0.006(3) -0.009(3)
 C01E 0.068(4) 0.020(3) 0.033(3) -0.004(2) 0.005(3) -0.005(3)
 C01F 0.054(4) 0.015(3) 0.039(3) -0.004(2) -0.012(3) -0.002(2)
 C01G 0.028(3) 0.042(3) 0.025(3) -0.003(2) 0.000(2) -0.005(2)
 C01H 0.027(3) 0.049(4) 0.032(3) -0.018(3) -0.007(2) 0.008(3)
 C01I 0.021(3) 0.039(3) 0.023(3) -0.002(2) -0.004(2) 0.003(2)
 C01J 0.064(5) 0.028(3) 0.057(4) -0.007(3) -0.030(4) 0.002(3)
 C01K 0.083(6) 0.026(3) 0.040(4) -0.006(3) -0.012(4) -0.001(3)
 C01L 0.111(7) 0.028(4) 0.034(4) -0.005(3) 0.015(4) -0.004(4)
 C01M 0.074(5) 0.022(3) 0.038(3) -0.002(3) 0.019(3) -0.006(3)
 C01N 0.082(5) 0.018(3) 0.038(3) -0.002(3) -0.013(3) 0.000(3)
 C01O 0.052(4) 0.033(4) 0.069(5) -0.004(3) -0.015(4) 0.001(3)
 C01P 0.051(4) 0.029(3) 0.058(4) -0.002(3) -0.007(3) 0.001(3)
 C01Q 0.042(3) 0.029(3) 0.042(3) -0.003(3) -0.005(3) 0.000(3)
 C01R 0.037(3) 0.050(4) 0.049(4) 0.022(3) -0.002(3) 0.010(3)
 C01S 0.023(3) 0.088(6) 0.025(3) -0.007(3) 0.002(2) 0.007(3)
 C01T 0.121(8) 0.025(3) 0.035(4) -0.004(3) 0.032(4) -0.011(4)
 C01U 0.093(6) 0.025(3) 0.060(5) -0.004(3) 0.034(4) -0.006(4)
 Ag4 0.068(4) 0.069(4) 0.069(4) -0.0005(10) 0.0020(10) 0.0000(10)

_geom_special_details
;
 All esds (except the esd in the dihedral angle between two l.s. planes)
 are estimated using the full covariance matrix.  The cell esds are taken
 into account individually in the estimation of esds in distances, angles
 and torsion angles; correlations between esds in cell parameters are only
 used when they are defined by crystal symmetry.  An approximate (isotropic)
 treatment of cell esds is used for estimating esds involving l.s. planes.
;
loop_
  _geom_bond_atom_site_label_1
  _geom_bond_atom_site_label_2
  _geom_bond_distance
  _geom_bond_site_symmetry_2
  _geom_bond_publ_flag
 Ag2 N2 2.076(4) . ?
 Ag2 N3 2.081(4) . ?
 Ag3 N4 2.104(4) . ?
 Ag3 N5 2.106(4) . ?
 Ag1 N1 2.168(4) . ?
 Ag1 N6 2.244(4) . ?
 Ag1 N00S 2.401(4) . ?
 F004 C011 1.334(6) . ?
 F005 C011 1.342(6) . ?
 F006 C016 1.341(6) . ?
 F007 C011 1.341(6) . ?
 F008 C01G 1.322(7) . ?
 F009 C016 1.331(6) . ?
 F00A C016 1.339(6) . ?
 N2 N1 1.357(5) . ?
 N2 C013 1.347(6) . ?
 F00C C017 1.343(7) . ?
 O00D C00V 1.220(6) . ?
 N4 N3 1.356(6) . ?
 N4 C00X 1.337(6) . ?
 F00F C01G 1.327(7) . ?
 F00G C01G 1.339(7) . ?
 F00H C017 1.318(6) . ?
 F00I C017 1.326(7) . ?
 F00J C01S 1.310(7) . ?
 N3 C010 1.337(6) . ?
 N1 C01I 1.337(7) . ?
 N1 Ag4 2.089(16) . ?
 F00M C01H 1.307(7) . ?
 N5 N6 1.356(6) . ?
 N5 C012 1.349(6) . ?
 F00O C01H 1.365(8) . ?
 N6 C00Y 1.344(6) . ?
 N6 Ag4 2.102(16) . ?
 F00Q C01H 1.314(7) . ?
 F00R C01S 1.324(8) . ?
 N00S C00W 1.351(7) . ?
 N00S C019 1.326(7) . ?
 C00T H00T 0.9300 . ?
 C00T C00Y 1.381(7) . ?
 C00T C012 1.371(7) . ?
 F00U C01S 1.361(9) . ?
 C00V C00W 1.509(7) . ?
 C00V C015 1.482(7) . ?
 C00W C01C 1.377(8) . ?
 C00X C00Z 1.383(7) . ?
 C00X C016 1.484(7) . ?
 C00Y C017 1.486(7) . ?
 C00Z H00Z 0.9300 . ?
 C00Z C010 1.378(7) . ?
 C010 C01G 1.500(7) . ?
 C011 C013 1.485(7) . ?
 C012 C01H 1.493(8) . ?
 C013 C01A 1.379(7) . ?
 C014 C01E 1.468(10) . ?
 C014 C01K 1.388(11) . ?
 C014 C01L 1.423(10) . ?
 C015 H015 0.9300 . ?
 C015 C01D 1.333(8) . ?
 C018 C01D 1.482(8) . ?
 C018 C01E 1.417(9) . ?
 C018 C01F 1.418(9) . ?
 C019 H019 0.9300 . ?
 C019 C01B 1.386(8) . ?
 C01A H01A 0.9300 . ?
 C01A C01I 1.392(7) . ?
 C01B H01B 0.9300 . ?
 C01B C01R 1.368(9) . ?
 C01C H01C 0.9300 . ?
 C01C C01R 1.384(9) . ?
 C01D H01D 0.9300 . ?
 C01E C01M 1.401(10) . ?
 C01F C01N 1.447(9) . ?
 C01F C01Q 1.410(9) . ?
 C01I C01S 1.473(8) . ?
 C01J H01J 0.9300 . ?
 C01J C01N 1.440(11) . ?
 C01J C01O 1.335(11) . ?
 C01K H01K 0.9300 . ?
 C01K C01N 1.362(11) . ?
 C01L H01L 0.9300 . ?
 C01L C01T 1.328(12) . ?
 C01M H01M 0.9300 . ?
 C01M C01U 1.358(9) . ?
 C01O H01O 0.9300 . ?
 C01O C01P 1.418(10) . ?
 C01P H01P 0.9300 . ?
 C01P C01Q 1.370(9) . ?
 C01Q H01Q 0.9300 . ?
 C01R H01R 0.9300 . ?
 C01T H01T 0.9300 . ?
 C01T C01U 1.442(12) . ?
 C01U H01U 0.9300 . ?

loop_
  _geom_angle_atom_site_label_1
  _geom_angle_atom_site_label_2
  _geom_angle_atom_site_label_3
  _geom_angle
  _geom_angle_site_symmetry_1
  _geom_angle_site_symmetry_3
  _geom_angle_publ_flag
 N2 Ag2 N3 175.64(17) . . ?
 N4 Ag3 N5 175.67(16) . . ?
 N1 Ag1 N6 142.84(16) . . ?
 N1 Ag1 N00S 118.67(15) . . ?
 N6 Ag1 N00S 94.32(15) . . ?
 N1 N2 Ag2 118.4(3) . . ?
 C013 N2 Ag2 132.9(3) . . ?
 C013 N2 N1 108.1(4) . . ?
 N3 N4 Ag3 117.9(3) . . ?
 C00X N4 Ag3 133.2(3) . . ?
 C00X N4 N3 107.9(4) . . ?
 N4 N3 Ag2 119.8(3) . . ?
 C010 N3 Ag2 132.6(3) . . ?
 C010 N3 N4 107.4(4) . . ?
 N2 N1 Ag1 122.0(3) . . ?
 N2 N1 Ag4 115.9(5) . . ?
 C01I N1 Ag1 130.5(3) . . ?
 C01I N1 N2 107.4(4) . . ?
 C01I N1 Ag4 129.3(6) . . ?
 N6 N5 Ag3 117.8(3) . . ?
 C012 N5 Ag3 133.7(3) . . ?
 C012 N5 N6 107.4(4) . . ?
 N5 N6 Ag1 118.0(3) . . ?
 N5 N6 Ag4 122.8(5) . . ?
 C00Y N6 Ag1 134.3(3) . . ?
 C00Y N6 N5 107.3(4) . . ?
 C00Y N6 Ag4 127.1(6) . . ?
 C00W N00S Ag1 121.3(3) . . ?
 C019 N00S Ag1 120.9(4) . . ?
 C019 N00S C00W 117.8(5) . . ?
 C00Y C00T H00T 128.3 . . ?
 C012 C00T H00T 128.3 . . ?
 C012 C00T C00Y 103.4(4) . . ?
 O00D C00V C00W 120.9(5) . . ?
 O00D C00V C015 121.7(5) . . ?
 C015 C00V C00W 117.4(5) . . ?
 N00S C00W C00V 115.7(4) . . ?
 N00S C00W C01C 121.8(5) . . ?
 C01C C00W C00V 122.5(5) . . ?
 N4 C00X C00Z 110.3(4) . . ?
 N4 C00X C016 121.5(4) . . ?
 C00Z C00X C016 128.2(5) . . ?
 N6 C00Y C00T 110.9(4) . . ?
 N6 C00Y C017 121.1(5) . . ?
 C00T C00Y C017 128.0(5) . . ?
 C00X C00Z H00Z 128.3 . . ?
 C010 C00Z C00X 103.5(4) . . ?
 C010 C00Z H00Z 128.3 . . ?
 N3 C010 C00Z 110.8(4) . . ?
 N3 C010 C01G 121.6(5) . . ?
 C00Z C010 C01G 127.4(5) . . ?
 F004 C011 F005 106.1(4) . . ?
 F004 C011 F007 106.1(4) . . ?
 F004 C011 C013 112.6(4) . . ?
 F005 C011 C013 112.8(4) . . ?
 F007 C011 F005 107.1(4) . . ?
 F007 C011 C013 111.6(4) . . ?
 N5 C012 C00T 110.9(4) . . ?
 N5 C012 C01H 120.7(5) . . ?
 C00T C012 C01H 128.3(5) . . ?
 N2 C013 C011 121.8(4) . . ?
 N2 C013 C01A 110.3(4) . . ?
 C01A C013 C011 127.9(4) . . ?
 C01K C014 C01E 119.1(6) . . ?
 C01K C014 C01L 123.6(7) . . ?
 C01L C014 C01E 117.2(8) . . ?
 C00V C015 H015 116.9 . . ?
 C01D C015 C00V 126.2(5) . . ?
 C01D C015 H015 116.9 . . ?
 F006 C016 C00X 112.7(4) . . ?
 F009 C016 F006 106.7(4) . . ?
 F009 C016 F00A 107.0(4) . . ?
 F009 C016 C00X 111.6(4) . . ?
 F00A C016 F006 105.5(4) . . ?
 F00A C016 C00X 112.9(4) . . ?
 F00C C017 C00Y 111.7(5) . . ?
 F00H C017 F00C 105.8(5) . . ?
 F00H C017 F00I 109.1(5) . . ?
 F00H C017 C00Y 112.8(4) . . ?
 F00I C017 F00C 105.4(4) . . ?
 F00I C017 C00Y 111.7(5) . . ?
 C01E C018 C01D 121.8(6) . . ?
 C01E C018 C01F 120.9(6) . . ?
 C01F C018 C01D 117.3(5) . . ?
 N00S C019 H019 118.2 . . ?
 N00S C019 C01B 123.5(5) . . ?
 C01B C019 H019 118.2 . . ?
 C013 C01A H01A 128.3 . . ?
 C013 C01A C01I 103.5(4) . . ?
 C01I C01A H01A 128.3 . . ?
 C019 C01B H01B 120.7 . . ?
 C01R C01B C019 118.5(5) . . ?
 C01R C01B H01B 120.7 . . ?
 C00W C01C H01C 120.2 . . ?
 C00W C01C C01R 119.6(6) . . ?
 C01R C01C H01C 120.2 . . ?
 C015 C01D C018 129.2(5) . . ?
 C015 C01D H01D 115.4 . . ?
 C018 C01D H01D 115.4 . . ?
 C018 C01E C014 117.6(7) . . ?
 C01M C01E C014 118.1(6) . . ?
 C01M C01E C018 124.2(6) . . ?
 C018 C01F C01N 119.6(6) . . ?
 C01Q C01F C018 123.4(6) . . ?
 C01Q C01F C01N 117.0(6) . . ?
 F008 C01G F00F 106.2(5) . . ?
 F008 C01G F00G 106.0(5) . . ?
 F008 C01G C010 112.0(5) . . ?
 F00F C01G F00G 107.9(5) . . ?
 F00F C01G C010 112.1(5) . . ?
 F00G C01G C010 112.2(4) . . ?
 F00M C01H F00O 103.5(5) . . ?
 F00M C01H F00Q 111.5(5) . . ?
 F00M C01H C012 112.0(5) . . ?
 F00O C01H C012 112.6(5) . . ?
 F00Q C01H F00O 101.4(6) . . ?
 F00Q C01H C012 114.8(5) . . ?
 N1 C01I C01A 110.8(4) . . ?
 N1 C01I C01S 120.4(5) . . ?
 C01A C01I C01S 128.8(5) . . ?
 C01N C01J H01J 118.8 . . ?
 C01O C01J H01J 118.8 . . ?
 C01O C01J C01N 122.4(7) . . ?
 C014 C01K H01K 118.2 . . ?
 C01N C01K C014 123.7(7) . . ?
 C01N C01K H01K 118.2 . . ?
 C014 C01L H01L 119.0 . . ?
 C01T C01L C014 122.0(8) . . ?
 C01T C01L H01L 119.0 . . ?
 C01E C01M H01M 118.8 . . ?
 C01U C01M C01E 122.5(8) . . ?
 C01U C01M H01M 118.8 . . ?
 C01J C01N C01F 118.3(7) . . ?
 C01K C01N C01F 118.7(7) . . ?
 C01K C01N C01J 123.0(7) . . ?
 C01J C01O H01O 120.3 . . ?
 C01J C01O C01P 119.3(7) . . ?
 C01P C01O H01O 120.3 . . ?
 C01O C01P H01P 119.7 . . ?
 C01Q C01P C01O 120.6(7) . . ?
 C01Q C01P H01P 119.7 . . ?
 C01F C01Q H01Q 118.9 . . ?
 C01P C01Q C01F 122.3(6) . . ?
 C01P C01Q H01Q 118.9 . . ?
 C01B C01R C01C 118.7(6) . . ?
 C01B C01R H01R 120.7 . . ?
 C01C C01R H01R 120.7 . . ?
 F00J C01S F00R 109.8(6) . . ?
 F00J C01S F00U 105.4(6) . . ?
 F00J C01S C01I 112.1(5) . . ?
 F00R C01S F00U 103.3(5) . . ?
 F00R C01S C01I 113.0(6) . . ?
 F00U C01S C01I 112.7(6) . . ?
 C01L C01T H01T 119.4 . . ?
 C01L C01T C01U 121.1(7) . . ?
 C01U C01T H01T 119.4 . . ?
 C01M C01U C01T 118.8(8) . . ?
 C01M C01U H01U 120.6 . . ?
 C01T C01U H01U 120.6 . . ?
 N1 Ag4 N6 172.7(10) . . ?

loop_
  _geom_torsion_atom_site_label_1
  _geom_torsion_atom_site_label_2
  _geom_torsion_atom_site_label_3
  _geom_torsion_atom_site_label_4
  _geom_torsion
  _geom_torsion_site_symmetry_1
  _geom_torsion_site_symmetry_2
  _geom_torsion_site_symmetry_3
  _geom_torsion_site_symmetry_4
  _geom_torsion_publ_flag
 Ag2 N2 N1 Ag1 -11.1(5) . . . . ?
 Ag2 N2 N1 C01I 172.1(4) . . . . ?
 Ag2 N2 N1 Ag4 -35.1(7) . . . . ?
 Ag2 N2 C013 C011 6.6(8) . . . . ?
 Ag2 N2 C013 C01A -170.8(4) . . . . ?
 Ag2 N3 C010 C00Z 176.0(4) . . . . ?
 Ag2 N3 C010 C01G -7.5(8) . . . . ?
 Ag3 N4 N3 Ag2 12.7(5) . . . . ?
 Ag3 N4 N3 C010 -171.2(3) . . . . ?
 Ag3 N4 C00X C00Z 169.0(4) . . . . ?
 Ag3 N4 C00X C016 -12.5(8) . . . . ?
 Ag3 N5 N6 Ag1 -16.1(4) . . . . ?
 Ag3 N5 N6 C00Y 170.3(3) . . . . ?
 Ag3 N5 N6 Ag4 7.8(8) . . . . ?
 Ag3 N5 C012 C00T -168.3(4) . . . . ?
 Ag3 N5 C012 C01H 14.8(8) . . . . ?
 Ag1 N1 C01I C01A -176.1(4) . . . . ?
 Ag1 N1 C01I C01S 4.6(9) . . . . ?
 Ag1 N6 C00Y C00T -172.2(4) . . . . ?
 Ag1 N6 C00Y C017 6.1(8) . . . . ?
 Ag1 N00S C00W C00V -0.3(6) . . . . ?
 Ag1 N00S C00W C01C 179.5(4) . . . . ?
 Ag1 N00S C019 C01B 179.4(5) . . . . ?
 F004 C011 C013 N2 -102.3(5) . . . . ?
 F004 C011 C013 C01A 74.5(7) . . . . ?
 F005 C011 C013 N2 17.7(7) . . . . ?
 F005 C011 C013 C01A -165.4(5) . . . . ?
 F007 C011 C013 N2 138.4(5) . . . . ?
 F007 C011 C013 C01A -44.8(8) . . . . ?
 N2 N1 C01I C01A 0.3(7) . . . . ?
 N2 N1 C01I C01S -179.0(6) . . . . ?
 N2 C013 C01A C01I 0.3(7) . . . . ?
 O00D C00V C00W N00S -7.6(7) . . . . ?
 O00D C00V C00W C01C 172.6(5) . . . . ?
 O00D C00V C015 C01D 37.3(9) . . . . ?
 N4 N3 C010 C00Z 0.6(6) . . . . ?
 N4 N3 C010 C01G 177.0(5) . . . . ?
 N4 C00X C00Z C010 -0.3(6) . . . . ?
 N4 C00X C016 F006 35.4(7) . . . . ?
 N4 C00X C016 F009 155.4(5) . . . . ?
 N4 C00X C016 F00A -84.1(6) . . . . ?
 N3 N4 C00X C00Z 0.7(6) . . . . ?
 N3 N4 C00X C016 179.1(5) . . . . ?
 N3 C010 C01G F008 140.4(5) . . . . ?
 N3 C010 C01G F00F -100.4(6) . . . . ?
 N3 C010 C01G F00G 21.2(8) . . . . ?
 N1 N2 C013 C011 177.2(4) . . . . ?
 N1 N2 C013 C01A -0.1(6) . . . . ?
 N1 C01I C01S F00J -173.8(6) . . . . ?
 N1 C01I C01S F00R -49.1(9) . . . . ?
 N1 C01I C01S F00U 67.5(8) . . . . ?
 N5 N6 C00Y C00T 0.0(6) . . . . ?
 N5 N6 C00Y C017 178.2(4) . . . . ?
 N5 C012 C01H F00M -155.1(5) . . . . ?
 N5 C012 C01H F00O 88.7(6) . . . . ?
 N5 C012 C01H F00Q -26.6(8) . . . . ?
 N6 N5 C012 C00T -0.9(6) . . . . ?
 N6 N5 C012 C01H -177.8(5) . . . . ?
 N6 C00Y C017 F00C -88.6(6) . . . . ?
 N6 C00Y C017 F00H 30.3(8) . . . . ?
 N6 C00Y C017 F00I 153.6(5) . . . . ?
 N00S C00W C01C C01R 0.4(9) . . . . ?
 N00S C019 C01B C01R 1.8(10) . . . . ?
 C00T C00Y C017 F00C 89.3(7) . . . . ?
 C00T C00Y C017 F00H -151.7(6) . . . . ?
 C00T C00Y C017 F00I -28.4(8) . . . . ?
 C00T C012 C01H F00M 28.6(8) . . . . ?
 C00T C012 C01H F00O -87.6(7) . . . . ?
 C00T C012 C01H F00Q 157.1(6) . . . . ?
 C00V C00W C01C C01R -179.9(6) . . . . ?
 C00V C015 C01D C018 1.4(11) . . . . ?
 C00W N00S C019 C01B -1.0(8) . . . . ?
 C00W C00V C015 C01D -142.3(6) . . . . ?
 C00W C01C C01R C01B 0.5(11) . . . . ?
 C00X N4 N3 Ag2 -176.9(3) . . . . ?
 C00X N4 N3 C010 -0.8(6) . . . . ?
 C00X C00Z C010 N3 -0.2(6) . . . . ?
 C00X C00Z C010 C01G -176.4(5) . . . . ?
 C00Y C00T C012 N5 0.9(6) . . . . ?
 C00Y C00T C012 C01H 177.5(6) . . . . ?
 C00Z C00X C016 F006 -146.5(5) . . . . ?
 C00Z C00X C016 F009 -26.5(8) . . . . ?
 C00Z C00X C016 F00A 94.1(7) . . . . ?
 C00Z C010 C01G F008 -43.8(8) . . . . ?
 C00Z C010 C01G F00F 75.4(7) . . . . ?
 C00Z C010 C01G F00G -163.0(6) . . . . ?
 C011 C013 C01A C01I -176.8(5) . . . . ?
 C012 N5 N6 Ag1 174.2(3) . . . . ?
 C012 N5 N6 C00Y 0.6(5) . . . . ?
 C012 N5 N6 Ag4 -161.9(7) . . . . ?
 C012 C00T C00Y N6 -0.5(6) . . . . ?
 C012 C00T C00Y C017 -178.6(5) . . . . ?
 C013 N2 N1 Ag1 176.7(3) . . . . ?
 C013 N2 N1 C01I -0.1(6) . . . . ?
 C013 N2 N1 Ag4 152.7(7) . . . . ?
 C013 C01A C01I N1 -0.4(7) . . . . ?
 C013 C01A C01I C01S 178.9(7) . . . . ?
 C014 C01E C01M C01U 4.3(9) . . . . ?
 C014 C01K C01N C01F 2.6(10) . . . . ?
 C014 C01K C01N C01J -177.2(6) . . . . ?
 C014 C01L C01T C01U -0.8(11) . . . . ?
 C015 C00V C00W N00S 172.1(5) . . . . ?
 C015 C00V C00W C01C -7.7(8) . . . . ?
 C016 C00X C00Z C010 -178.6(5) . . . . ?
 C018 C01E C01M C01U -177.7(6) . . . . ?
 C018 C01F C01N C01J 176.5(5) . . . . ?
 C018 C01F C01N C01K -3.3(9) . . . . ?
 C018 C01F C01Q C01P -176.8(6) . . . . ?
 C019 N00S C00W C00V -179.9(5) . . . . ?
 C019 N00S C00W C01C -0.1(8) . . . . ?
 C019 C01B C01R C01C -1.5(10) . . . . ?
 C01A C01I C01S F00J 7.0(11) . . . . ?
 C01A C01I C01S F00R 131.7(7) . . . . ?
 C01A C01I C01S F00U -111.7(7) . . . . ?
 C01D C018 C01E C014 -177.5(5) . . . . ?
 C01D C018 C01E C01M 4.5(9) . . . . ?
 C01D C018 C01F C01N -178.4(5) . . . . ?
 C01D C018 C01F C01Q 1.6(8) . . . . ?
 C01E C014 C01K C01N 1.8(10) . . . . ?
 C01E C014 C01L C01T 4.7(10) . . . . ?
 C01E C018 C01D C015 48.7(10) . . . . ?
 C01E C018 C01F C01N -0.5(8) . . . . ?
 C01E C018 C01F C01Q 179.6(6) . . . . ?
 C01E C01M C01U C01T -0.4(10) . . . . ?
 C01F C018 C01D C015 -133.4(7) . . . . ?
 C01F C018 C01E C014 4.7(8) . . . . ?
 C01F C018 C01E C01M -173.3(6) . . . . ?
 C01J C01O C01P C01Q -0.9(10) . . . . ?
 C01K C014 C01E C018 -5.3(8) . . . . ?
 C01K C014 C01E C01M 172.8(6) . . . . ?
 C01K C014 C01L C01T -174.4(7) . . . . ?
 C01L C014 C01E C018 175.5(5) . . . . ?
 C01L C014 C01E C01M -6.4(8) . . . . ?
 C01L C014 C01K C01N -179.2(6) . . . . ?
 C01L C01T C01U C01M -1.6(10) . . . . ?
 C01N C01F C01Q C01P 3.2(9) . . . . ?
 C01N C01J C01O C01P 0.5(10) . . . . ?
 C01O C01J C01N C01F 1.7(10) . . . . ?
 C01O C01J C01N C01K -178.5(7) . . . . ?
 C01O C01P C01Q C01F -1.1(10) . . . . ?
 C01Q C01F C01N C01J -3.5(8) . . . . ?
 C01Q C01F C01N C01K 176.7(6) . . . . ?
 Ag4 N1 C01I C01A -147.6(8) . . . . ?
 Ag4 N1 C01I C01S 33.1(11) . . . . ?
 Ag4 N6 C00Y C00T 161.5(7) . . . . ?
 Ag4 N6 C00Y C017 -20.3(9) . . . . ?

_shelx_res_file
;
TITL a_a.res in P2(1)/n
    a.res
    created by SHELXL-2018/3 at 14:30:48 on 30-Mar-2023
REM Old TITL a in P2(1)/n
REM SHELXT solution in P2(1)/n
REM R1 0.139, Rweak 0.007, Alpha 0.049, Orientation as input
REM Formula found by SHELXT: C36 N6 O3 F18 Ag3
CELL 0.71073 13.1222 14.3897 20.6671 90 91.486 90
ZERR 4 0.0008 0.001 0.0014 0 0.003 0
LATT 1
SYMM 0.5-X,0.5+Y,0.5-Z
SFAC C H Ag F N O
UNIT 148 72 12 72 28 4
ISOR 0.001 0.002 Ag4

L.S. 14
PLAN  20
TEMP 23
CONF
BOND $H
list 4
MORE -1
fmap 2
acta
OMIT -2 52
OMIT -7 2 4
OMIT -11 1 3
OMIT 12 2 14
OMIT 14 4 4
OMIT 6 7 13
OMIT 14 3 2
OMIT -9 3 10
OMIT -7 1 7
OMIT -11 3 3
OMIT 13 2 0
OMIT -11 6 4
OMIT -3 4 21
REM <olex2.extras>
REM <HklSrc "%.\\a.hkl">
REM </olex2.extras>

WGHT    0.000100   30.527100
FVAR       0.14221
AG2   3    0.314126    0.624805    0.212404    11.00000    0.01449    0.02818 =
         0.01762   -0.00355    0.00187    0.00000
AG3   3    0.292484    0.695194    0.368513    11.00000    0.01710    0.02771 =
         0.01961   -0.00577   -0.00085   -0.00217
PART 1
AG1   3    0.530327    0.637472    0.315960    10.95000    0.01848    0.02554 =
         0.01385   -0.00167    0.00069   -0.00220
PART 0
F004  4    0.396514    0.512229    0.035603    11.00000    0.03669    0.03231 =
         0.02921   -0.00889   -0.00739   -0.00027
F005  4    0.324627    0.636162    0.068746    11.00000    0.02302    0.05200 =
         0.02356   -0.00572   -0.00256    0.01037
F006  4    0.084593    0.709415    0.433238    11.00000    0.03418    0.04049 =
         0.02284   -0.00701    0.00562   -0.00634
F007  4    0.451076    0.644354    0.004260    11.00000    0.03711    0.05090 =
         0.01966    0.01034   -0.00010   -0.00354
F008  4   -0.006277    0.512810    0.151859    11.00000    0.04331    0.04406 =
         0.03764   -0.01518   -0.00833   -0.00530
F009  4   -0.065391    0.665474    0.403255    11.00000    0.01734    0.07406 =
         0.03656   -0.00897    0.00569    0.00738
F00A  4    0.044861    0.565848    0.437892    11.00000    0.04769    0.03677 =
         0.03188    0.00572    0.00834   -0.00014
N2    5    0.457350    0.616480    0.172397    11.00000    0.01527    0.02313 =
         0.01597    0.00108    0.00030   -0.00196
F00C  4    0.739725    0.752733    0.439424    11.00000    0.02516    0.05599 =
         0.06336    0.00673    0.00114    0.00403
O00D  6    0.413998    0.522974    0.378563    11.00000    0.02819    0.02525 =
         0.02752    0.00342    0.00125    0.00051
N4    5    0.164338    0.639771    0.318850    11.00000    0.01582    0.02281 =
         0.01988   -0.00543    0.00210    0.00124
F00F  4    0.017262    0.655251    0.130982    11.00000    0.08818    0.04452 =
         0.03058    0.00181   -0.02249   -0.00231
F00G  4    0.143005    0.558847    0.130408    11.00000    0.02609    0.11741 =
         0.02963   -0.02212    0.00204   -0.00397
F00H  4    0.700450    0.793895    0.343375    11.00000    0.03816    0.11003 =
         0.02863   -0.01730    0.00993   -0.02181
F00I  4    0.723772    0.896425    0.418199    11.00000    0.04074    0.03823 =
         0.08704   -0.01365    0.01097   -0.02096
F00J  4    0.794577    0.577325    0.164302    11.00000    0.01711    0.16531 =
         0.03207   -0.00306    0.00702    0.01896
N3    5    0.171896    0.622640    0.254631    11.00000    0.01774    0.02782 =
         0.01880   -0.00473   -0.00181   -0.00097
N1    5    0.540220    0.611865    0.212920    11.00000    0.01818    0.02941 =
         0.01782   -0.00192    0.00027    0.00174
F00M  4    0.344517    0.935043    0.525552    11.00000    0.08416    0.03623 =
         0.06754   -0.02388    0.04194   -0.00976
N5    5    0.417397    0.760589    0.415510    11.00000    0.02009    0.02211 =
         0.01744   -0.00430   -0.00185    0.00107
F00O  4    0.330309    0.796641    0.556089    11.00000    0.06221    0.05939 =
         0.05541    0.00904    0.02512    0.00041
N6    5    0.510352    0.750685    0.389207    11.00000    0.02129    0.02338 =
         0.01641   -0.00104   -0.00078   -0.00156
F00Q  4    0.247521    0.836556    0.473985    11.00000    0.03252    0.12078 =
         0.05739   -0.04649   -0.00238    0.01294
F00R  4    0.746332    0.652211    0.248450    11.00000    0.03108    0.11276 =
         0.06028   -0.02977   -0.01631    0.00018
N00S  5    0.621219    0.536559    0.389757    11.00000    0.02562    0.02548 =
         0.02138    0.00145    0.00016    0.00147
C00T  1    0.524188    0.858372    0.467505    11.00000    0.03205    0.02343 =
         0.02015   -0.00332   -0.00655   -0.00315
AFIX  43
H00T  2    0.550671    0.902720    0.496029    11.00000   -1.20000
AFIX   0
F00U  4    0.731845    0.506612    0.244280    11.00000    0.04710    0.11598 =
         0.05632    0.01689   -0.01196    0.02672
C00V  1    0.458792    0.464301    0.411061    11.00000    0.03003    0.02555 =
         0.01965   -0.00095    0.00199   -0.00182
C00W  1    0.572520    0.470030    0.423161    11.00000    0.02856    0.02298 =
         0.02300   -0.00103    0.00430    0.00459
C00X  1    0.066629    0.629631    0.334256    11.00000    0.01980    0.02369 =
         0.02471   -0.00019    0.00412    0.00122
C00Y  1    0.574285    0.809388    0.420471    11.00000    0.02347    0.02273 =
         0.02000    0.00114   -0.00284   -0.00416
C00Z  1    0.008635    0.604552    0.280211    11.00000    0.01216    0.03925 =
         0.02865   -0.00308   -0.00087   -0.00161
AFIX  43
H00Z  2   -0.061031    0.592842    0.277284    11.00000   -1.20000
AFIX   0
C010  1    0.078680    0.601051    0.231732    11.00000    0.01872    0.02695 =
         0.02312   -0.00425   -0.00166   -0.00143
C011  1    0.415455    0.598823    0.055566    11.00000    0.02178    0.02682 =
         0.01546    0.00104    0.00433    0.00204
C012  1    0.426073    0.825996    0.462096    11.00000    0.02108    0.02669 =
         0.02038   -0.00426   -0.00446    0.00419
C013  1    0.488520    0.602403    0.111576    11.00000    0.02149    0.02325 =
         0.01908   -0.00087    0.00321   -0.00111
C014  1    0.278045    0.374968    0.229760    11.00000    0.10263    0.01390 =
         0.02781   -0.00065    0.00928   -0.00418
C015  1    0.404381    0.384702    0.439797    11.00000    0.03262    0.02896 =
         0.02540    0.00636    0.00134   -0.00249
AFIX  43
H015  2    0.426473    0.365529    0.480782    11.00000   -1.20000
AFIX   0
C016  1    0.032754    0.642374    0.401609    11.00000    0.01783    0.03171 =
         0.02815    0.00129    0.00483    0.00235
C017  1    0.683948    0.813860    0.404465    11.00000    0.02982    0.03405 =
         0.02490   -0.00391   -0.00269   -0.00859
C018  1    0.276963    0.350851    0.347975    11.00000    0.05275    0.01810 =
         0.02986    0.00037   -0.00101   -0.00784
C019  1    0.721281    0.544078    0.398752    11.00000    0.02547    0.03261 =
         0.02653    0.00339   -0.00290   -0.00254
AFIX  43
H019  2    0.755448    0.589089    0.375389    11.00000   -1.20000
AFIX   0
C01A  1    0.592499    0.588597    0.111570    11.00000    0.01829    0.05288 =
         0.01897   -0.00472    0.00414    0.00356
AFIX  43
H01A  2    0.633674    0.577662    0.076416    11.00000   -1.20000
AFIX   0
C01B  1    0.777692    0.488487    0.441089    11.00000    0.02400    0.04592 =
         0.03647    0.00873   -0.00235    0.00366
AFIX  43
H01B  2    0.847554    0.497274    0.446843    11.00000   -1.20000
AFIX   0
C01C  1    0.623942    0.411312    0.465245    11.00000    0.03171    0.03746 =
         0.04266    0.01743    0.00462    0.00268
AFIX  43
H01C  2    0.588729    0.365808    0.487504    11.00000   -1.20000
AFIX   0
C01D  1    0.326780    0.337949    0.412502    11.00000    0.05011    0.02563 =
         0.02676    0.00669    0.00550   -0.00854
AFIX  43
H01D  2    0.300146    0.290508    0.437521    11.00000   -1.20000
AFIX   0
C01E  1    0.334217    0.358401    0.291002    11.00000    0.06785    0.02009 =
         0.03282   -0.00444    0.00521   -0.00475
C01F  1    0.168913    0.352251    0.345014    11.00000    0.05385    0.01523 =
         0.03902   -0.00389   -0.01231   -0.00231
C01G  1    0.058256    0.582363    0.161185    11.00000    0.02801    0.04241 =
         0.02491   -0.00311    0.00033   -0.00460
C01H  1    0.337016    0.850830    0.502184    11.00000    0.02695    0.04868 =
         0.03155   -0.01781   -0.00724    0.00764
C01I  1    0.621124    0.594934    0.176752    11.00000    0.02091    0.03940 =
         0.02339   -0.00197   -0.00394    0.00315
C01J  1    0.006522    0.358098    0.281183    11.00000    0.06425    0.02819 =
         0.05714   -0.00699   -0.03023    0.00238
AFIX  43
H01J  2   -0.027807    0.362743    0.241379    11.00000   -1.20000
AFIX   0
C01K  1    0.172251    0.374717    0.229199    11.00000    0.08256    0.02594 =
         0.03963   -0.00582   -0.01234   -0.00051
AFIX  43
H01K  2    0.137694    0.383594    0.189828    11.00000   -1.20000
AFIX   0
C01L  1    0.336545    0.389207    0.173585    11.00000    0.11134    0.02791 =
         0.03399   -0.00494    0.01541   -0.00437
AFIX  43
H01L  2    0.303112    0.404390    0.134788    11.00000   -1.20000
AFIX   0
C01M  1    0.440276    0.348285    0.289224    11.00000    0.07421    0.02238 =
         0.03788   -0.00216    0.01915   -0.00612
AFIX  43
H01M  2    0.476020    0.333562    0.327297    11.00000   -1.20000
AFIX   0
C01N  1    0.116202    0.362204    0.283056    11.00000    0.08168    0.01838 =
         0.03820   -0.00218   -0.01348    0.00033
C01O  1   -0.047693    0.347866    0.334501    11.00000    0.05223    0.03333 =
         0.06944   -0.00362   -0.01492    0.00145
AFIX  43
H01O  2   -0.118467    0.344963    0.331641    11.00000   -1.20000
AFIX   0
C01P  1    0.003750    0.341468    0.395545    11.00000    0.05060    0.02875 =
         0.05804   -0.00167   -0.00723    0.00069
AFIX  43
H01P  2   -0.033660    0.335221    0.432905    11.00000   -1.20000
AFIX   0
C01Q  1    0.108079    0.344411    0.399971    11.00000    0.04186    0.02886 =
         0.04156   -0.00321   -0.00524   -0.00025
AFIX  43
H01Q  2    0.139857    0.341120    0.440654    11.00000   -1.20000
AFIX   0
C01R  1    0.728374    0.420402    0.474234    11.00000    0.03718    0.05042 =
         0.04850    0.02248   -0.00189    0.01044
AFIX  43
H01R  2    0.764291    0.380996    0.502256    11.00000   -1.20000
AFIX   0
C01S  1    0.723243    0.584544    0.207225    11.00000    0.02329    0.08778 =
         0.02532   -0.00693    0.00208    0.00673
C01T  1    0.437435    0.381470    0.174883    11.00000    0.12105    0.02466 =
         0.03506   -0.00419    0.03157   -0.01072
AFIX  43
H01T  2    0.472911    0.390590    0.137028    11.00000   -1.20000
AFIX   0
C01U  1    0.492882    0.359166    0.233997    11.00000    0.09315    0.02505 =
         0.05999   -0.00445    0.03386   -0.00570
AFIX  43
H01U  2    0.563370    0.352357    0.234305    11.00000   -1.20000
AFIX   0
PART 2
AG4   3    0.531327    0.687905    0.298694    10.05000    0.06823    0.06920 =
         0.06877   -0.00052    0.00199    0.00000
HKLF 4


REM  a_a.res in P2(1)/n
REM wR2 = 0.097769, GooF = S = 1.15142, Restrained GooF = 1.15098 for all data
REM R1 = 0.042397 for 7068 Fo > 4sig(Fo) and 0.046179 for all 7611 data
REM 604 parameters refined using 6 restraints

END

WGHT      0.0005     30.5320

REM Highest difference peak  1.549,  deepest hole -0.900,  1-sigma level  0.131
Q1    1   0.2953  0.7584  0.3612  11.00000  0.05    1.55
Q2    1   0.3179  0.6892  0.2104  11.00000  0.05    1.31
Q3    1   0.5369  0.5789  0.3160  11.00000  0.05    1.26
Q4    1   0.2969  0.6287  0.3724  11.00000  0.05    1.25
Q5    1   0.3009  0.9445  0.4475  11.00000  0.05    1.04
Q6    1   0.2794  0.9033  0.4511  11.00000  0.05    1.02
Q7    1   0.3159  0.5610  0.2136  11.00000  0.05    1.01
Q8    1   0.1374  0.6381  0.1269  11.00000  0.05    0.99
Q9    1   0.5352  0.7387  0.2801  11.00000  0.05    0.94
Q10   1   0.7619  0.6933  0.2052  11.00000  0.05    0.88
Q11   1   0.2873  0.7991  0.5152  11.00000  0.05    0.83
Q12   1   0.3616  0.6936  0.3480  11.00000  0.05    0.72
Q13   1   0.4469  0.6398  0.3451  11.00000  0.05    0.70
Q14   1   0.5137  0.7144  0.4681  11.00000  0.05    0.66
Q15   1   0.7402  0.5738  0.2592  11.00000  0.05    0.64
Q16   1   0.2263  0.6998  0.3919  11.00000  0.05    0.64
Q17   1   0.7251  0.7401  0.3952  11.00000  0.05    0.59
Q18   1   0.3039  0.5598  0.1697  11.00000  0.05    0.59
Q19   1   0.7966  0.6594  0.1593  11.00000  0.05    0.58
Q20   1   0.3932  0.6224  0.1863  11.00000  0.05    0.56
;
_shelx_res_checksum                97474
_shelx_hkl_file
;
  -2   0   0    2.20    0.50
   2   0   0    2.30    0.20
   2   0   0    2.30    0.50
  -2   0   0    1.90    0.20
  -3   0   0    0.50    0.10
  -3   0   0    0.20    0.20
  -3   0   0    1.90    0.70
   3   0   0    0.10    0.40
  -4   0   0 2031.70   99.49
   5   0   0    2.70    0.50
  -5   0   0    4.10    0.40
  -6   0   0  196.78    9.70
  -6   0   0  193.78    9.60
   6   0   0  196.48    9.60
   6   0   0  200.18    9.80
   6   0   0  184.68   10.00
  -6   0   0  191.78    9.80
  -7   0   0    1.50    0.50
  -7   0   0    2.50    0.50
   7   0   0    0.70    0.40
   7   0   0    1.00    0.40
  -7   0   0    1.40    0.30
  -8   0   0  821.82   40.50
   8   0   0  841.92   40.70
   8   0   0  810.22   41.60
   8   0   0  837.92   40.20
   8   0   0  816.62   40.40
  -8   0   0  806.62   40.10
  10   0   0  188.58    9.60
 -10   0   0  162.28    8.70
 -10   0   0  171.28    9.10
  10   0   0  155.38    8.50
  10   0   0  187.08   10.80
 -10   0   0  171.88    8.70
 -11   0   0   -0.10    0.70
 -11   0   0    0.40    0.40
  11   0   0    0.40    0.30
  12   0   0   60.69    6.70
  12   0   0   67.29    5.20
 -12   0   0   69.89    4.40
 -12   0   0   70.89    3.80
  13   0   0   62.09    5.40
  13   0   0   81.19    7.60
  14   0   0   67.29    7.30
 -14   0   0   49.99    3.70
  14   0   0   63.79    5.10
 -14   0   0   50.49    4.10
 -15   0   0   -0.30    0.70
  15   0   0    1.40    2.00
  15   0   0    2.80    3.40
 -15   0   0   -0.20    1.30
 -16   0   0    3.00    1.60
  16   0   0    0.40    3.70
 -16   0   0    2.40    0.90
  16   0   0   -0.60    2.10
  17   0   0    2.70    2.30
 -17   0   0    0.90    0.90
  17   0   0    6.10    4.20
 -18   0   0   46.10    4.40
  18   0   0   45.10    5.30
 -18   0   0   39.20    3.20
  18   0   0   47.70    8.10
  -1  -1   0  407.06   20.90
  -1  -1   0  464.35   20.80
   1   1   0  405.56   20.90
  -2  -1   0   61.69    3.00
   2  -1   0   59.39    3.30
  -2  -1   0   63.79    3.40
  -2  -1   0   52.59    2.90
   2   1   0   63.49    3.00
   2   1   0   54.89    2.90
  -2   1   0   53.79    2.90
  -2   1   0   57.39    3.30
  -3  -1   0  125.19    6.60
  -3  -1   0  115.19    6.00
   3  -1   0  120.39    6.50
  -3  -1   0  126.29    6.10
   3  -1   0  112.39    6.00
  -3   1   0  118.69    6.00
   3   1   0  127.99    6.10
   3   1   0  126.09    6.50
  -3   1   0  118.49    6.00
  -3   1   0  115.59    6.50
   3   1   0  117.09    5.90
  -4  -1   0 2278.67  106.79
  -4   1   0 2081.59  106.89
   5  -1   0   97.99    4.90
   5  -1   0   87.09    4.60
   5  -1   0   97.19    5.50
  -5  -1   0   85.39    4.70
  -5  -1   0   82.09    4.50
  -5  -1   0   85.69    5.60
  -5   1   0   89.69    5.60
   5   1   0   94.19    5.50
  -5   1   0   80.59    4.40
   5   1   0   90.49    4.90
  -5   1   0   87.69    4.60
   5   1   0   85.09    4.40
   5   1   0   85.09    4.60
  -6  -1   0    3.10    0.40
   6  -1   0    3.10    0.50
   6  -1   0    3.10    0.80
  -6  -1   0    2.90    0.40
  -6  -1   0    2.60    0.60
   6   1   0    2.50    0.40
  -6   1   0    2.80    0.40
  -6   1   0    2.60    0.50
   6   1   0    3.60    0.90
  -6   1   0    2.50    0.40
   7  -1   0  252.07   12.90
   7  -1   0  242.08   13.60
  -7  -1   0  250.37   12.70
  -7  -1   0  245.68   12.40
  -7  -1   0  251.47   12.40
   7  -1   0  255.67   12.60
   7   1   0  265.27   12.60
   7   1   0  252.97   12.90
   7   1   0  251.47   12.40
   7   1   0  249.08   13.70
  -7   1   0  244.48   12.40
  -7   1   0  243.08   12.30
  -7   1   0  253.87   12.60
  -8  -1   0  435.56   22.50
   8  -1   0  447.56   24.00
   8  -1   0  458.15   23.10
  -8  -1   0  468.55   22.60
   8  -1   0  435.66   22.70
   8   1   0  493.75   23.10
   8   1   0  467.65   22.50
  -8   1   0  450.15   22.70
   8   1   0  490.95   22.70
   8   1   0  465.25   24.00
  -8   1   0  432.06   22.50
  -9  -1   0   15.40    1.80
   9  -1   0   14.70    1.20
   9   1   0   12.50    0.90
  -9   1   0   15.70    1.50
  -9   1   0   13.10    1.10
   9   1   0   13.30    1.10
  -9   1   0   10.40    1.20
  10  -1   0  269.37   14.60
  10  -1   0  298.17   15.50
 -10  -1   0  297.37   14.80
  10  -1   0  291.97   16.70
 -10  -1   0  299.07   15.30
 -10   1   0  280.07   14.70
  10   1   0  325.97   15.80
  10   1   0  293.17   14.50
 -10   1   0  299.07   14.70
  10   1   0  298.07   16.60
 -10   1   0  308.17   15.10
  11  -1   0    5.80    2.50
  11  -1   0    4.60    1.60
  11   1   0    6.00    2.50
  11   1   0    7.60    0.70
 -11   1   0    7.60    1.20
 -11   1   0    6.60    0.80
 -12  -1   0    8.60    1.60
 -12  -1   0    8.00    1.20
  12  -1   0    7.00    3.10
  12   1   0    6.00    3.00
  12   1   0    4.40    2.00
  13  -1   0  208.98   14.10
 -13  -1   0  216.58   12.00
 -13  -1   0  221.68   11.30
  13  -1   0  217.98   12.30
 -13   1   0  227.38   11.20
  13   1   0  217.98   14.20
 -13   1   0  227.18   11.80
  13   1   0  223.18   12.30
  14  -1   0  185.08   10.80
  14  -1   0  188.48   12.90
 -14  -1   0  180.88    9.60
 -14  -1   0  182.28   10.40
 -14   1   0  187.38   10.10
  14   1   0  180.98   12.60
  14   1   0  181.88   10.70
 -15  -1   0   25.90    3.10
  15  -1   0   24.70    5.20
  15  -1   0   24.80    4.00
 -15  -1   0   25.80    2.20
  15   1   0   26.00    3.90
 -15   1   0   25.80    2.80
 -15   1   0   25.60    2.10
  15   1   0   30.90    6.20
 -16  -1   0   24.70    3.00
 -16  -1   0   21.80    2.20
  16  -1   0   22.00    5.40
  16   1   0   23.00    5.40
 -16   1   0   24.00    2.00
 -16   1   0   25.90    2.80
  17  -1   0    6.50    4.30
 -17  -1   0    5.00    1.30
 -17  -1   0    7.10    2.40
  17  -1   0    4.20    2.50
  17   1   0   12.00    4.50
 -17   1   0    7.60    1.60
  17   1   0    6.90    2.60
  18  -1   0    9.10    4.60
 -18  -1   0    3.80    1.40
 -18  -1   0    7.10    2.50
  18  -1   0    6.10    2.60
 -18   1   0    6.80    2.00
 -18   1   0    5.10    1.20
   0   2   0  289.57   14.30
  -1  -2   0  222.88   11.50
  -1  -2   0  233.58   11.40
  -1  -2   0  219.68   11.50
   1   2   0  217.58   11.50
   1   2   0  239.98   11.40
  -1   2   0  256.17   11.50
   1   2   0  225.08   11.50
   2  -2   0  175.98    8.70
  -2  -2   0  171.28    8.60
  -2  -2   0  165.28    8.80
  -2  -2   0  166.08    8.50
   2   2   0  166.58    8.40
  -2   2   0  166.08    8.70
   2   2   0  173.48    8.80
   2   2   0  177.28    8.60
   3  -2   0  189.58   10.10
  -3  -2   0  190.08    9.70
  -3  -2   0  188.68   10.30
  -3  -2   0  204.38    9.90
   3   2   0  188.58    9.70
   3   2   0  216.58    9.90
  -3   2   0  183.78   10.10
   3   2   0  206.78   10.30
  -4  -2   0  319.57   15.50
   4  -2   0  316.67   15.40
  -4  -2   0  307.47   16.00
  -4  -2   0  272.07   15.20
   4  -2   0  312.07   15.90
   4   2   0  330.27   15.30
  -4   2   0  288.97   15.20
   4   2   0  343.67   16.10
   4   2   0  281.07   15.10
   4   2   0  319.17   16.00
  -5  -2   0  178.38    8.40
   5  -2   0  172.58    8.70
  -5  -2   0  156.78    9.40
  -5  -2   0  175.18    8.70
  -5  -2   0  153.18    8.40
   5  -2   0  169.48    9.20
   5   2   0  165.28    8.30
  -5   2   0  164.78    8.30
   5   2   0  177.98    8.50
  -5   2   0  166.88    8.40
   5   2   0  170.68    9.30
   5   2   0  167.78    8.70
  -5   2   0  155.88    9.20
  -6  -2   0   22.50    1.30
  -6  -2   0   16.40    1.20
  -6  -2   0   20.30    1.60
  -6   2   0   16.80    1.30
   6   2   0   19.70    1.80
   6   2   0   20.90    3.00
  -6   2   0   18.10    1.20
   6   2   0   20.20    1.30
   6   2   0   19.00    1.20
   7  -2   0  302.47   16.70
   7  -2   0  314.47   15.90
  -7  -2   0  327.77   15.70
  -7  -2   0  332.07   15.90
  -7  -2   0  288.17   15.50
   7   2   0  323.37   16.00
   7   2   0  310.87   16.70
   7   2   0  313.57   15.40
  -7   2   0  299.27   15.40
  -7   2   0  310.57   15.60
   7   2   0  327.27   15.70
   8  -2   0  129.99    7.60
  -8  -2   0  135.49    7.70
   8  -2   0  155.78    9.30
  -8  -2   0  153.38    8.20
   8  -2   0  162.98    8.30
  -8  -2   0  154.78    7.70
   8   2   0  152.28    7.60
   8   2   0  150.28    7.50
  -8   2   0  149.29    8.00
  -8   2   0  145.09    7.70
   8   2   0  167.98    8.40
   8   2   0  162.68    9.40
   9  -2   0  972.40   51.29
   9  -2   0 1039.00   52.99
  -9  -2   0  906.81   51.39
   9  -2   0 1076.89   51.99
  -9  -2   0 1092.19   51.49
  -9  -2   0 1104.29   51.99
   9   2   0 1069.89   52.99
   9   2   0 1084.09   51.29
  -9   2   0 1055.39   51.29
   9   2   0 1076.39   51.99
  -9   2   0 1098.49   51.59
 -10  -2   0   46.80    3.40
 -10  -2   0   44.90    2.80
  10  -2   0   52.39    3.90
  10  -2   0   58.19    5.20
 -10   2   0   44.80    3.00
  10   2   0   47.20    2.50
 -10   2   0   44.10    2.60
 -10   2   0   40.90    2.60
  10   2   0   49.20    2.60
  10   2   0   56.19    4.30
 -11  -2   0    4.00    1.30
 -11  -2   0    4.40    0.80
  11  -2   0    4.70    0.90
  11  -2   0    2.10    1.60
  11  -2   0    2.00    2.30
  11   2   0    1.40    2.20
  11   2   0    4.80    0.50
 -11   2   0    3.50    0.90
  11   2   0    3.90    1.70
 -11   2   0    3.70    0.70
  12  -2   0   10.30    2.20
  12  -2   0    8.40    1.30
  12  -2   0   16.50    5.90
 -12   2   0   11.80    1.50
 -12   2   0   13.00    1.10
 -13  -2   0   87.79    5.00
  13  -2   0   81.09    7.90
 -13  -2   0   93.39    5.90
  13  -2   0   78.19    6.10
  14  -2   0   30.40    4.20
  14  -2   0   42.10    6.60
 -15  -2   0   36.70    3.70
 -15  -2   0   32.80    2.60
  15   2   0   36.60    6.60
 -15   2   0   32.90    3.00
 -15   2   0   31.40    2.30
  15   2   0   36.10    4.40
 -16  -2   0    3.60    2.10
  16  -2   0   -0.80    3.20
  16  -2   0   -0.60    2.00
 -16   2   0    1.40    0.70
 -16   2   0    1.00    1.20
  16   2   0    5.70    3.90
  16   2   0    2.20    2.20
  17  -2   0   39.20    7.40
 -17  -2   0   40.10    3.40
 -17  -2   0   45.60    4.70
  17  -2   0   42.80    5.10
  17   2   0   44.30    5.10
 -17   2   0   44.50    3.00
  17   2   0   48.00    7.70
  18  -2   0   10.30    4.90
 -18  -2   0    9.50    3.00
  18  -2   0    7.10    2.70
 -18  -2   0    5.90    1.60
  18   2   0   18.60    4.70
 -18   2   0   10.30    1.60
 -18   2   0    9.00    2.10
   0   3   0    0.50    0.40
  -1  -3   0   16.70    1.30
  -1   3   0   17.50    1.30
   1   3   0   18.00    1.20
   1   3   0   20.60    1.30
  -2  -3   0   53.49    3.00
  -2  -3   0   54.19    3.30
   2  -3   0   54.99    3.30
  -2  -3   0   58.59    3.20
   2   3   0   58.39    3.10
   2   3   0   56.69    3.00
  -2   3   0   54.39    3.20
   2   3   0   51.69    3.20
  -3  -3   0   47.80    2.60
   3  -3   0   51.39    3.10
  -3  -3   0   46.80    2.90
  -3  -3   0   56.49    3.30
   3   3   0   48.70    2.60
   3   3   0   47.00    2.80
  -3   3   0   41.00    3.00
   4  -3   0  474.05   23.00
  -4  -3   0  472.65   23.20
  -4  -3   0  482.25   22.80
  -4  -3   0  435.06   23.50
  -4  -3   0  420.16   22.80
   4  -3   0  467.45   23.40
  -4   3   0  476.15   23.70
   4   3   0  496.75   23.00
   4   3   0  439.76   22.80
   4   3   0  468.05   23.50
   4   3   0  477.85   23.10
  -5  -3   0 2128.99   97.89
  -5  -3   0 1919.01   98.39
   5  -3   0 2054.89   98.29
  -5  -3   0 1927.41   97.49
  -5   3   0 1926.31   98.19
   5   3   0 2059.09   98.29
   6  -3   0  109.09    5.90
  -6  -3   0  122.39    6.10
  -6  -3   0  120.69    6.50
  -6  -3   0  106.99    6.10
   6  -3   0  118.79    6.40
   6  -3   0  116.79    7.20
   6   3   0  115.49    6.00
   6   3   0  130.49    9.20
   6   3   0  128.59    6.20
   6   3   0  119.09    6.40
  -6   3   0  116.79    6.10
  -6   3   0  115.49    6.10
   7  -3   0   46.70    4.20
   7  -3   0   50.49    3.40
  -7  -3   0   47.00    3.20
   7  -3   0   48.40    2.80
  -7  -3   0   55.79    2.90
  -7  -3   0   56.19    3.40
   7   3   0   50.49    2.60
  -7   3   0   54.49    2.80
   7   3   0   52.39    3.40
   7   3   0   53.49    2.80
  -7   3   0   55.89    3.00
   7   3   0   48.40    4.20
  -8  -3   0   14.80    1.30
  -8  -3   0   11.00    1.10
  -8  -3   0   13.70    1.80
  -8   3   0   11.20    0.90
   8   3   0   13.00    1.00
   8   3   0   12.40    0.80
   8   3   0   19.20    3.40
  -8   3   0   11.00    1.20
  -9  -3   0    2.70    0.80
  -9  -3   0    5.20    1.30
  -9   3   0    2.70    0.50
   9   3   0    3.80    0.50
   9   3   0    5.20    0.70
  -9   3   0    3.90    0.80
 -10  -3   0  306.57   15.20
  10  -3   0  249.78   14.20
  10  -3   0  269.67   16.20
  10  -3   0  286.27   15.10
 -10  -3   0  294.07   14.50
 -10   3   0  293.37   14.20
  10   3   0  286.07   16.20
  10   3   0  275.17   15.70
 -10   3   0  301.27   14.60
  10   3   0  301.47   14.30
  10   3   0  297.07   14.20
 -11  -3   0   14.20    1.40
 -11  -3   0   14.50    2.10
 -11  -3   0   10.80    1.50
  11   3   0   12.90    2.90
  11   3   0    8.70    3.00
  11   3   0   11.50    0.90
 -11   3   0   13.80    1.10
 -11   3   0   13.90    1.40
 -12  -3   0   60.79    3.60
  12  -3   0   47.50    4.70
 -12  -3   0   66.39    4.40
 -12   3   0   51.19    3.50
  12   3   0   65.29    6.50
  12   3   0   61.19    3.00
  12   3   0   61.39    4.70
 -12   3   0   51.09    3.10
 -13  -3   0  279.37   15.40
  13  -3   0  294.57   17.50
  13  -3   0  283.07   15.50
 -13  -3   0  271.87   14.60
 -13   3   0  293.47   14.20
  13   3   0  287.77   17.00
  13   3   0  280.57   15.30
 -13   3   0  288.87   14.70
 -14  -3   0   28.40    3.50
 -14  -3   0   25.70    2.50
  14  -3   0   33.20    4.30
 -15  -3   0    1.90    1.70
 -15  -3   0    1.60    1.00
  15  -3   0    5.50    3.60
  15   3   0    6.40    3.70
  15   3   0    2.50    2.10
 -15   3   0    0.80    1.00
 -15   3   0    0.60    0.60
  16  -3   0    1.70    2.20
 -16  -3   0    4.70    1.30
 -16  -3   0    5.80    2.20
  16  -3   0    1.40    3.80
 -16   3   0    5.90    1.50
  16   3   0    2.20    2.30
 -16   3   0    5.80    1.00
  16   3   0    0.80    3.70
  17  -3   0   59.19    5.70
 -17  -3   0   48.30    3.90
 -17  -3   0   56.19    5.30
  17  -3   0   49.80    9.20
  17   3   0   54.59    5.70
 -17   3   0   57.29    3.40
  17   3   0   53.59    8.00
  18  -3   0   49.30    5.60
 -18  -3   0   44.70    3.90
 -18  -3   0   48.40    5.30
  18  -3   0   51.49    8.80
  18   3   0   58.89    8.20
 -18   3   0   55.09    4.20
  18   3   0   51.19    5.60
 -18   3   0   50.59    3.30
   0  -4   0 9999.00  507.75
   0   4   0 9941.01  508.45
  -1  -4   0  222.88   11.60
   1   4   0  224.98   11.60
  -1   4   0  222.98   11.50
   1   4   0  237.58   11.40
  -2  -4   0  307.17   14.80
   2  -4   0  308.57   15.10
  -2  -4   0  292.27   15.10
  -2  -4   0  287.27   15.10
  -2   4   0  299.27   15.00
   2   4   0  298.07   15.00
   2   4   0  278.97   15.00
   2   4   0  312.67   14.90
  -3  -4   0  423.46   22.20
  -3  -4   0  444.46   21.80
  -3  -4   0  451.85   21.70
  -3  -4   0  438.56   22.10
   3  -4   0  453.45   22.20
   3   4   0  466.75   22.20
   3   4   0  448.46   21.80
   3   4   0  435.96   22.20
  -3   4   0  411.16   22.10
  -4  -4   0  189.68   10.30
   4  -4   0  215.38   10.40
   4  -4   0  214.08   10.90
  -4  -4   0  207.88   10.60
  -4  -4   0  217.38   10.20
  -4  -4   0  198.58   11.20
   4   4   0  198.58   10.30
  -4   4   0  192.58   10.80
   4   4   0  207.28   10.90
   4   4   0  215.58   10.40
   4   4   0  200.68   10.20
   4   4   0  179.78   10.00
  -5  -4   0   37.40    2.50
  -5  -4   0   43.60    3.50
  -5  -4   0   38.80    2.80
   5   4   0   35.30    2.20
   5   4   0   45.10    2.70
   5   4   0   37.70    2.50
  -6  -4   0  798.12   41.70
  -6  -4   0  897.11   42.30
   6  -4   0  845.22   42.70
  -6  -4   0  894.51   41.70
   6  -4   0  872.71   42.00
  -6   4   0  832.62   41.70
   6   4   0  854.81   41.60
   6   4   0  815.52   41.40
   6   4   0  850.71   41.90
  -7  -4   0   11.60    1.30
  -7  -4   0   17.50    1.30
   7  -4   0   14.30    2.70
  -7  -4   0   14.70    1.80
   7   4   0   14.90    1.90
   7   4   0   14.00    1.10
   7   4   0   13.70    0.90
   7   4   0   15.70    2.90
  -7   4   0   15.60    1.10
   8  -4   0  387.96   21.60
  -8  -4   0  415.56   20.90
  -8  -4   0  427.36   20.30
   8  -4   0  427.36   20.70
  -8  -4   0  364.56   20.20
   8   4   0  423.66   20.60
   8   4   0  414.06   20.10
   8   4   0  404.26   19.90
   8   4   0  405.66   21.50
  -8   4   0  409.76   20.20
  -8   4   0  399.46   20.10
   9  -4   0  262.37   13.80
  -9  -4   0  266.17   13.20
  -9  -4   0  262.77   13.90
   9  -4   0  250.07   14.80
   9   4   0  267.57   13.60
   9   4   0  270.87   14.80
   9   4   0  248.08   13.00
   9   4   0  250.17   13.00
  -9   4   0  266.37   13.20
 -10  -4   0   29.40    2.70
 -10  -4   0   27.50    2.00
  10  -4   0   21.80    3.20
  10  -4   0   27.70    4.70
  10   4   0   23.00    1.40
  10   4   0   23.00    1.70
 -10   4   0   22.60    1.80
  10   4   0   32.50    4.40
  10   4   0   24.70    3.10
 -11  -4   0  191.28    9.90
  11  -4   0  179.28   12.10
  11  -4   0  179.98   10.60
 -11  -4   0  187.18   10.60
 -11   4   0  198.38    9.50
 -11   4   0  198.28    9.80
  11   4   0  198.48    9.50
  11   4   0  179.88   10.50
  11   4   0  175.88   11.80
  11   4   0  194.58    9.30
  12  -4   0    2.60    3.10
  12  -4   0    2.50    1.90
 -12  -4   0    6.20    1.80
  12   4   0    4.80    0.80
  12   4   0    3.80    1.90
 -12   4   0    4.20    1.00
  12   4   0    0.40    2.80
  12   4   0    5.80    0.60
 -12   4   0    5.10    0.80
 -13  -4   0  124.19    7.00
 -13  -4   0  122.29    7.90
  13  -4   0  123.39    8.00
  13  -4   0  130.29   10.10
 -13   4   0  119.19    6.50
  13   4   0  133.99    7.90
  13   4   0  121.39    6.30
 -13   4   0  120.89    6.90
  13   4   0  143.49    9.80
 -14  -4   0  339.47   18.10
  14  -4   0  302.37   17.90
  14  -4   0  322.77   20.20
 -14  -4   0  346.77   17.10
 -14   4   0  328.27   17.10
 -14   4   0  324.67   16.60
  14   4   0  359.26   19.80
  14   4   0  342.87   17.90
 -15  -4   0   13.90    2.10
 -15  -4   0    8.70    2.90
  15   4   0    9.90    4.10
 -15   4   0   14.10    1.40
 -15   4   0   13.80    1.80
  15   4   0    8.90    2.60
 -16  -4   0    9.00    2.60
 -16   4   0   11.80    1.40
 -16   4   0   13.80    2.00
 -17  -4   0    6.70    2.70
  17  -4   0    5.00    2.50
 -17  -4   0    5.50    1.60
  17   4   0    4.60    2.50
  17   4   0   10.80    4.10
 -17   4   0    7.10    2.20
 -17   4   0    8.00    1.30
   0  -5   0    3.90   13.60
   0   5   0    0.70   13.30
  -1  -5   0  366.06   18.30
  -1  -5   0  362.26   18.80
   1  -5   0  370.16   18.30
   1   5   0  369.96   18.70
   1   5   0  390.16   18.50
  -1   5   0  369.16   18.80
   2   5   0   44.20    2.50
  -2   5   0   34.60    2.50
   3  -5   0   77.59    4.30
   3  -5   0   75.59    4.70
  -3   5   0   70.89    4.40
   4  -5   0  653.63   29.70
   4  -5   0  616.74   30.30
  -4  -5   0  565.54   29.70
  -4  -5   0  602.34   29.60
  -4   5   0  611.34   30.20
   4   5   0  605.14   29.90
   4   5   0  585.34   29.60
   4   5   0  586.34   29.60
   4   5   0  587.74   30.20
  -5  -5   0    3.70    1.20
   5  -5   0    2.10    0.90
   5  -5   0    3.10    1.60
  -5  -5   0    4.70    1.10
   5   5   0    4.20    1.40
  -6  -5   0   28.50    2.50
   6  -5   0   26.70    2.50
  -6  -5   0   28.70    2.00
  -6  -5   0   30.20    2.00
   6   5   0   26.80    1.60
   6   5   0   29.00    1.80
   6   5   0   26.30    2.30
  -7  -5   0   92.29    5.40
  -7  -5   0  104.79    6.10
   7  -5   0   98.09    5.80
   7  -5   0   81.59    6.90
  -7  -5   0  107.39    5.40
   7   5   0  102.29    5.00
   7   5   0  104.29    5.70
   7   5   0   96.89    6.60
  -7   5   0  101.99    5.30
  -8  -5   0  143.39    7.50
   8  -5   0  141.69    8.00
   8  -5   0  135.39    9.10
  -8  -5   0  142.09    8.20
   8   5   0  138.59    7.30
  -8   5   0  151.78    7.50
   8   5   0  141.89    8.80
   8   5   0  145.09    7.90
   8   5   0  139.69    7.10
   9  -5   0  168.48    9.60
   9  -5   0  160.58   10.50
  -9  -5   0  165.78    8.80
  -9  -5   0  169.48    9.60
   9   5   0  170.38    8.50
   9   5   0  161.88    8.30
  -9   5   0  166.48    8.70
   9   5   0  166.58   10.30
   9   5   0  172.28    9.20
  10  -5   0  159.88   10.60
  10  -5   0  162.88    9.10
 -10  -5   0  162.08    9.30
 -10  -5   0  158.98    8.40
 -10   5   0  156.98    8.30
  10   5   0  151.58    7.80
  10   5   0  159.48    8.90
  10   5   0  157.68    8.10
  10   5   0  153.78   10.10
 -11  -5   0  105.29    6.10
  11  -5   0  100.99    8.50
 -11  -5   0  107.09    6.70
  11  -5   0  102.19    6.80
  11   5   0  105.09    5.20
 -11   5   0  106.29    5.70
  11   5   0  106.39    5.40
  11   5   0  101.09    6.60
  11   5   0   94.59    8.00
  12  -5   0   18.10    3.90
 -12   5   0    8.70    1.40
 -12   5   0   11.50    1.00
  13  -5   0   40.50    4.40
  13  -5   0   45.70    6.80
 -13  -5   0   34.40    4.00
 -13  -5   0   34.60    3.00
  13   5   0   48.00    6.00
  13   5   0   37.60    2.10
  13   5   0   35.90    4.10
 -13   5   0   38.80    2.80
  13   5   0   38.10    2.30
  14  -5   0  117.39    7.80
 -14  -5   0  105.99    6.50
  14  -5   0  134.49   10.50
 -14  -5   0  105.09    7.70
 -14   5   0  104.39    6.30
  14   5   0  115.99    7.40
 -14   5   0  105.89    5.80
  14   5   0  135.89    9.80
  14   5   0  105.99    5.70
 -15  -5   0   38.40    3.30
  15  -5   0   37.30    4.70
 -15  -5   0   34.10    4.40
  15  -5   0   57.59    7.90
 -15   5   0   43.10    2.50
  15   5   0   37.10    4.50
 -15   5   0   44.40    3.10
  15   5   0   37.50    6.70
  16  -5   0    5.30    4.40
 -16  -5   0    5.10    2.70
 -16  -5   0    2.20    1.40
  16  -5   0    0.50    2.20
 -16   5   0    5.70    1.40
  16   5   0    0.90    2.30
 -16   5   0    3.50    0.80
  16   5   0    0.50    3.50
 -17  -5   0   31.10    3.20
 -17  -5   0   30.70    4.60
  17  -5   0   28.40    4.70
 -17   5   0   35.10    2.30
  17   5   0   29.30    4.60
 -17   5   0   40.70    3.10
  17   5   0   29.10    5.80
   0  -6   0  961.60   46.80
   0   6   0  918.31   47.10
   0   6   0  982.00   47.20
  -1  -6   0   34.10    2.20
   1   6   0   31.40    2.40
  -1   6   0   34.70    2.60
   1   6   0   38.80    2.60
  -2  -6   0   37.00    2.40
   2  -6   0   42.00    2.50
  -2  -6   0   33.80    2.90
   2   6   0   33.30    2.70
  -2   6   0   45.90    2.70
  -3  -6   0   49.50    3.50
   3  -6   0   46.70    2.90
  -3  -6   0   49.00    2.90
   3   6   0   46.80    3.40
   4  -6   0  136.79    7.40
  -4  -6   0  147.09    8.70
  -4  -6   0  145.69    8.00
  -4  -6   0  144.59    7.30
   4  -6   0  143.89    8.10
  -4   6   0  131.89    7.70
   4   6   0  132.49    7.50
   4   6   0  135.89    7.30
   4   6   0  136.89    7.90
   5  -6   0  392.16   19.40
  -5  -6   0  359.06   20.10
  -5  -6   0  407.46   19.30
  -5  -6   0  396.16   19.90
   5   6   0  393.16   19.30
   5   6   0  392.96   19.20
   5   6   0  354.86   18.90
   5   6   0  386.66   20.00
   6  -6   0   34.50    3.00
   6  -6   0   35.90    4.30
   6   6   0   33.90    2.00
   6   6   0   37.90    2.40
   6   6   0   41.30    4.10
   7  -6   0   51.49    3.80
   7  -6   0   43.50    4.80
   7   6   0   59.99    3.10
   7   6   0   56.49    2.90
  -8  -6   0   28.70    3.10
  -8  -6   0   29.20    2.20
   8  -6   0   25.40    3.90
  -8   6   0   22.80    1.90
   8   6   0   25.80    1.80
   8   6   0   32.40    3.90
   8   6   0   31.50    2.70
   8   6   0   25.90    1.60
  -9  -6   0   57.99    4.60
  -9  -6   0   57.59    3.70
   9  -6   0   56.19    5.80
  -9   6   0   64.09    3.50
   9   6   0   54.39    4.20
   9   6   0   59.59    3.10
   9   6   0   51.69    5.30
   9   6   0   58.89    3.30
 -10  -6   0    1.30    1.00
  10  -6   0    3.70    1.60
  10  -6   0    3.90    2.50
 -10  -6   0    0.50    1.60
  10   6   0    0.70    2.30
  10   6   0    3.30    0.70
 -10   6   0    3.60    0.80
  10   6   0    0.30    1.40
  10   6   0    2.10    0.40
  11  -6   0  118.89    9.70
  11  -6   0  121.89    8.10
 -11  -6   0  138.39    8.50
 -11  -6   0  135.49    7.40
  11   6   0  133.59    7.90
  11   6   0  121.39    9.40
 -11   6   0  137.19    7.10
  11   6   0  138.89    6.70
  11   6   0  143.89    6.90
  12  -6   0    7.30    3.50
  12  -6   0    4.60    2.10
 -12  -6   0    5.80    1.40
 -12  -6   0    4.60    2.10
  12   6   0    7.90    1.10
 -12   6   0    6.80    1.30
  12   6   0    5.40    3.80
  12   6   0    7.60    0.80
  12   6   0    8.40    2.10
  13  -6   0   58.99    5.30
  13  -6   0   69.89    7.70
 -13   6   0   59.09    3.40
  13   6   0   66.19    3.50
  13   6   0   64.79    3.30
 -13   6   0   56.19    3.80
 -14  -6   0    1.30    2.60
 -14  -6   0    2.90    1.60
  14   6   0    7.10    0.80
 -14   6   0    6.60    1.40
  14   6   0    8.20    3.60
 -14   6   0    5.50    1.00
  15  -6   0  148.99   10.10
 -15  -6   0  157.88    9.00
  15  -6   0  143.69   13.00
 -15  -6   0  149.49   10.20
 -15   6   0  169.98    8.10
 -15   6   0  172.68    8.70
  15   6   0  155.18   11.80
  15   6   0  136.19   10.40
  15   6   0  176.48    7.90
 -16  -6   0    3.90    1.50
 -16  -6   0    4.40    2.60
  16  -6   0    8.50    4.90
  16  -6   0    6.60    2.50
  16   6   0    4.20    3.50
  16   6   0    5.70    2.60
 -17  -6   0   37.30    5.20
 -17  -6   0   31.40    3.40
  17  -6   0   36.40    8.10
  17  -6   0   34.30    5.00
 -17   6   0   37.60    3.00
  17   6   0   41.50    7.90
  17   6   0   32.90    4.70
 -17   6   0   35.10    2.30
   0  -7   0   -0.20    0.50
   0   7   0   -0.50    0.70
  -1  -7   0  417.86   21.10
   1  -7   0  405.36   21.00
   1   7   0  449.76   21.30
  -2  -7   0   20.60    2.30
   2  -7   0   20.50    1.50
  -2  -7   0   21.40    1.70
   2   7   0   18.00    1.80
  -2   7   0   19.10    2.00
   3  -7   0    1.60    0.70
   3  -7   0    1.90    0.50
   3   7   0    1.50    0.80
  -3   7   0    2.00    0.80
   4  -7   0   52.69    4.30
  -4  -7   0   53.69    4.20
  -4  -7   0   53.09    4.50
  -4  -7   0   55.29    3.40
   4   7   0   56.89    3.40
   4   7   0   58.79    3.40
   4   7   0   55.69    4.20
  -4   7   0   46.30    3.80
  -5  -7   0   18.50    3.40
  -5  -7   0   25.10    3.00
  -5  -7   0   25.40    2.10
   5   7   0   21.60    1.90
   5   7   0   23.10    3.30
  -6  -7   0   56.29    3.40
  -6  -7   0   55.99    4.30
   6  -7   0   45.20    3.70
   6   7   0   54.79    3.50
   6   7   0   49.40    4.30
   6   7   0   52.49    2.80
   6   7   0   52.39    3.20
  -7  -7   0    3.90    1.00
   7  -7   0    0.40    1.40
  -7  -7   0    4.80    1.60
   7   7   0    3.10    0.80
   7   7   0    3.30    1.10
   7   7   0    2.70    1.80
   7   7   0    2.90    0.50
  -8  -7   0   70.49    5.20
   8  -7   0   60.29    4.70
   8  -7   0   57.99    6.00
  -8  -7   0   72.49    4.30
   8   7   0   73.69    4.50
  -8   7   0   69.89    4.00
   8   7   0   67.59    3.60
   8   7   0   73.89    3.90
   8   7   0   72.49    5.60
  -9  -7   0  199.78   11.80
  -9  -7   0  221.78   12.00
   9  -7   0  201.98   11.20
   9  -7   0  202.98   12.50
   9   7   0  203.48   10.20
   9   7   0  202.68   11.00
   9   7   0  210.28   10.40
  -9   7   0  198.88   10.60
   9   7   0  200.98   12.20
 -10  -7   0   76.99    5.90
 -10  -7   0   74.79    4.90
  10  -7   0   87.89    5.70
  10  -7   0   81.19    7.40
  10   7   0   80.49    4.30
  10   7   0   79.69    4.10
  10   7   0   75.59    6.90
 -10   7   0   75.79    4.50
  10   7   0   70.19    5.30
 -11  -7   0   13.60    2.90
  11  -7   0   16.90    3.80
 -11  -7   0   15.10    2.20
  11  -7   0   20.00    3.50
  11   7   0   13.50    1.10
  11   7   0   12.40    1.30
  11   7   0   10.90    3.40
 -11   7   0   12.20    1.50
  11   7   0   16.50    3.00
 -12  -7   0   23.80    3.80
 -12  -7   0   29.10    2.90
  12  -7   0   36.40    6.20
  12  -7   0   37.30    4.20
  12   7   0   31.50    1.80
  12   7   0   30.80    2.10
 -12   7   0   31.90    2.40
  12   7   0   28.50    3.70
 -13  -7   0   74.29    7.80
 -13  -7   0   90.59    5.90
  13  -7   0  100.89    7.00
  13  -7   0  108.89    9.50
  13   7   0   97.99    4.90
  13   7   0   95.29    6.60
  13   7   0   98.99    8.40
 -13   7   0   95.99    5.50
  13   7   0   98.79    5.20
 -14  -7   0   13.40    2.70
 -14  -7   0    8.80    3.20
  14   7   0   15.00    1.10
 -14   7   0   13.40    1.30
 -14   7   0   16.40    1.80
  14   7   0   20.50    3.70
  14   7   0   16.70    1.50
  15  -7   0   51.99    8.60
  15  -7   0   45.20    5.50
 -15  -7   0   55.99    5.70
 -15  -7   0   59.69    4.30
 -15   7   0   42.10    2.80
  15   7   0   53.19    2.70
 -15   7   0   43.70    3.60
  16  -7   0   19.70    5.50
  16  -7   0   23.00    4.60
 -16  -7   0   21.30    3.10
 -16  -7   0   23.60    4.30
  16   7   0   24.10    4.40
 -16   7   0   23.90    1.70
  16   7   0   30.70    6.50
 -16   7   0   26.30    2.30
  17  -7   0    2.70    4.10
 -17  -7   0    0.60    3.00
  17  -7   0    0.60    2.40
 -17   7   0    2.30    1.00
 -17   7   0    0.90    0.50
  17   7   0    0.40    2.30
   0  -8   0 1031.70   53.19
   0   8   0 1143.89   53.69
   1  -8   0  227.98   11.80
  -1  -8   0  222.98   11.90
   1   8   0  247.58   12.20
  -2  -8   0  301.57   15.90
  -2  -8   0  294.57   15.10
   2  -8   0  285.17   15.00
   2  -8   0  297.67   15.00
   2   8   0  318.87   15.40
   3  -8   0   23.00    1.80
  -3  -8   0   22.00    2.10
  -3  -8   0   20.90    2.90
   3   8   0   23.80    2.20
  -3   8   0   29.70    2.50
  -4  -8   0   64.39    4.80
  -4  -8   0   62.89    3.90
   4  -8   0   68.39    3.90
   4   8   0   55.69    4.60
  -4   8   0   52.49    4.40
   4   8   0   59.39    3.70
   5  -8   0  144.29    8.90
  -5  -8   0  152.98    8.70
   5  -8   0  140.09    7.80
  -5  -8   0  146.49    7.70
  -5  -8   0  151.68    8.90
   5   8   0  128.79    8.50
   5   8   0  134.49    7.60
  -6  -8   0  192.08   11.10
   6  -8   0  202.98   11.70
  -6  -8   0  197.28   10.20
   6  -8   0  196.78   10.30
   6   8   0  178.68    9.60
   6   8   0  190.98   10.10
   6   8   0  193.58   10.00
   6   8   0  188.88   11.10
   7  -8   0   10.20    2.00
  -7  -8   0   15.00    1.90
  -7  -8   0   14.60    2.60
   7  -8   0   12.60    3.40
   7   8   0   12.80    1.10
   7   8   0   11.20    1.40
   8  -8   0    2.70    2.40
   8  -8   0    1.40    1.50
  -8  -8   0    2.80    1.20
  -8  -8   0    2.80    1.80
   8   8   0    2.80    1.30
   8   8   0    4.30    0.70
   8   8   0    3.60    2.10
   8   8   0    3.30    0.90
  -9  -8   0   12.20    2.30
  -9  -8   0   12.90    2.90
   9   8   0   15.30    3.10
   9   8   0   17.90    1.20
  -9   8   0   16.80    1.70
   9   8   0   16.10    2.70
   9   8   0   19.90    1.60
  10  -8   0   13.20    3.60
 -10  -8   0    8.90    2.70
 -10  -8   0    8.60    1.70
  10   8   0   10.40    3.20
  10   8   0   13.10    1.00
  10   8   0   14.60    1.40
  10   8   0    9.20    2.00
 -10   8   0   11.50    1.50
 -11  -8   0   31.80    4.50
 -11  -8   0   35.30    3.20
  11  -8   0   39.10    4.40
  11   8   0   38.60    2.40
  11   8   0   34.80    3.70
  11   8   0   35.80    5.60
 -11   8   0   36.40    2.60
  11   8   0   36.70    2.10
  12  -8   0   50.19    7.20
 -12  -8   0   50.79    5.80
  12  -8   0   49.10    5.20
 -12  -8   0   59.29    4.20
  12   8   0   60.29    4.80
  12   8   0   63.99    3.50
  12   8   0   60.49   10.40
  12   8   0   61.19    3.20
 -12   8   0   61.09    3.70
 -13  -8   0    0.90    2.30
  13  -8   0    2.00    2.10
  13  -8   0    4.40    3.80
 -13  -8   0   -0.70    1.40
 -13   8   0    0.70    0.80
  13   8   0    0.20    1.90
  13   8   0    1.50    0.80
  13   8   0   -1.40    2.90
  13   8   0    1.30    0.60
  14  -8   0  294.07   19.10
 -14  -8   0  281.67   15.60
 -14  -8   0  281.97   17.10
  14   8   0  295.57   16.10
  14   8   0  321.07   14.90
  14   8   0  303.67   18.20
 -14   8   0  292.87   15.20
  15  -8   0   18.80    5.40
 -15  -8   0   14.20    3.00
 -15  -8   0   14.80    3.90
 -15   8   0   12.90    1.80
  15   8   0   17.60    4.30
 -15   8   0   11.70    1.30
  15   8   0   13.10    1.30
  15   8   0   15.30    1.50
  15   8   0   13.70    3.60
  16  -8   0    5.10    2.80
  16  -8   0    3.20    4.80
 -16  -8   0    6.30    2.40
 -16  -8   0    9.80    3.40
 -16   8   0    8.30    1.10
 -16   8   0    9.70    1.60
  16   8   0    6.70    2.70
  16   8   0   10.40    4.00
   0  -9   0    1.70    0.80
   0   9   0    0.10    1.10
   1  -9   0  205.48   10.90
  -1  -9   0  213.58   11.00
  -1   9   0  220.78   11.50
   1   9   0  212.18   11.40
  -2  -9   0    1.00    0.80
   2  -9   0    0.00    0.60
   2  -9   0   -1.20    0.90
   3  -9   0   29.50    2.40
  -3  -9   0   32.10    2.50
   3  -9   0   31.50    2.10
  -3  -9   0   29.50    3.30
   3   9   0   30.20    2.20
  -3   9   0   27.50    2.60
   3   9   0   29.30    2.50
  -4  -9   0   -1.70    1.50
   4  -9   0    0.20    0.90
   4   9   0   -0.30    0.80
   4   9   0    1.10    0.90
  -5  -9   0   19.40    3.10
  -5  -9   0   14.10    2.10
   5   9   0   10.80    2.10
   6  -9   0  324.37   16.80
  -6  -9   0  348.37   17.10
   6  -9   0  337.77   18.00
  -6  -9   0  331.27   17.70
   6   9   0  315.57   17.40
   6   9   0  319.07   16.50
   6   9   0  298.87   16.10
   6   9   0  326.67   16.50
   7  -9   0    2.00    2.50
   7  -9   0    1.60    1.50
  -7  -9   0    2.40    2.10
  -7  -9   0    1.30    1.10
   7   9   0    1.70    0.50
   7   9   0    1.80    1.20
   7   9   0    1.50    1.90
   7   9   0    2.20    0.90
   8  -9   0   19.70    3.40
  -8  -9   0   20.60    3.40
  -8  -9   0   21.20    2.40
   8  -9   0   21.80    4.60
   8   9   0   21.90    1.50
   8   9   0   17.70    3.10
   8   9   0   23.30    1.90
   8   9   0   19.90    2.60
   9  -9   0   31.50    3.60
  -9  -9   0   20.60    3.70
   9  -9   0   28.70    5.30
  -9  -9   0   21.40    2.80
   9   9   0   28.60    1.70
   9   9   0   30.20    2.10
   9   9   0   24.30    3.10
   9   9   0   24.00    3.80
  10  -9   0  493.65   25.30
 -10  -9   0  471.65   26.20
 -10  -9   0  475.65   24.90
  10  -9   0  490.95   27.20
 -10   9   0  484.85   24.60
  10   9   0  513.25   24.50
  10   9   0  491.95   26.30
  10   9   0  504.15   25.00
 -11  -9   0   19.20    2.90
 -11  -9   0   17.30    3.60
  11  -9   0   28.80    6.20
  11   9   0   28.50    5.50
  11   9   0   24.10    1.90
  11   9   0   22.20    1.50
  11   9   0   23.80    3.40
 -11   9   0   20.70    2.10
 -12  -9   0   -1.40    1.40
  12  -9   0    5.30    3.40
  12  -9   0    3.00    2.10
 -12  -9   0   -1.30    2.20
  12   9   0   -1.30    1.70
  12   9   0   -0.70    2.90
  12   9   0    0.60    0.80
 -12   9   0    0.90    0.90
  12   9   0    1.00    0.50
 -13  -9   0   44.50    4.20
 -13  -9   0   41.80    5.30
  13   9   0   53.59    2.80
  13   9   0   54.69    6.70
  13   9   0   49.99    4.80
  13   9   0   54.59    3.20
 -13   9   0   52.09    3.70
  14  -9   0   11.70    4.60
 -14  -9   0    7.60    2.10
 -14  -9   0    5.00    3.20
  14  -9   0    9.90    2.90
 -14   9   0   11.30    1.70
  14   9   0   14.20    3.90
  14   9   0    9.70    1.00
  14   9   0   11.50    1.50
  15  -9   0    2.00    2.60
 -15  -9   0   -0.70    1.80
 -15  -9   0    0.40    2.80
  15  -9   0    1.80    4.20
  15   9   0    0.50    0.40
  15   9   0    1.40    0.80
  15   9   0    1.30    2.30
 -15   9   0    0.60    0.60
 -15   9   0    0.20    0.90
  15   9   0    3.60    3.20
 -16  -9   0   21.70    3.30
 -16  -9   0   27.40    5.00
  16   9   0   29.10    6.30
 -16   9   0   20.90    2.10
  16   9   0   20.60    4.20
 -16   9   0   20.40    1.60
   0 -10   0   17.80    1.90
   0  10   0   14.10    2.30
   1 -10   0   82.69    4.80
  -1 -10   0   78.19    4.90
  -1  10   0   89.39    5.40
   1  10   0   85.09    5.30
   2 -10   0  402.06   20.50
  -2 -10   0  410.76   20.70
   2  10   0  425.16   20.90
  -2  10   0  397.36   21.00
   3 -10   0   21.70    2.40
   3 -10   0   23.90    1.90
  -4 -10   0   30.00    3.50
   4  10   0   29.10    2.50
  -5 -10   0  100.49    6.00
  -5 -10   0   99.79    7.10
   5  10   0  104.59    5.90
   5  10   0   96.89    5.70
   6 -10   0   73.39    5.00
  -6 -10   0   69.89    5.80
  -6 -10   0   72.59    4.70
   6  10   0   69.99    4.50
   6  10   0   70.69    5.60
   6  10   0   67.99    4.40
  -7 -10   0   -0.40    2.00
   7 -10   0    0.30    1.60
  -7 -10   0    0.60    1.20
   7  10   0    1.60    0.60
   7  10   0    1.80    2.00
   7  10   0    1.90    1.00
   7  10   0    1.30    1.20
   8 -10   0   34.00    4.20
   8 -10   0   43.90    5.80
  -8 -10   0   30.40    3.20
  -8 -10   0   35.20    4.30
   8  10   0   29.20    4.30
   8  10   0   34.70    2.10
   8  10   0   37.10    2.60
   8  10   0   31.60    3.10
   9 -10   0  204.68   13.60
  -9 -10   0  200.28   11.30
   9 -10   0  209.68   11.70
   9  10   0  210.18   12.50
   9  10   0  206.58   10.80
   9  10   0  208.68   10.40
   9  10   0  211.38   11.30
 -10 -10   0  188.28   12.40
  10 -10   0  212.68   11.60
  10 -10   0  222.48   13.90
 -10 -10   0  192.18   11.10
  10  10   0  213.78   12.70
  10  10   0  200.58   10.50
  10  10   0  199.28   10.20
  10  10   0  199.88   11.10
 -10  10   0  195.28   10.70
  11 -10   0   34.60    4.50
 -11 -10   0   38.10    3.70
 -11 -10   0   40.00    5.00
  11 -10   0   42.90    7.10
  11  10   0   39.90    2.70
  11  10   0   53.19    6.00
  11  10   0   44.40    4.10
 -11  10   0   35.50    2.90
  11  10   0   37.90    2.30
 -12 -10   0   15.80    3.00
  12 -10   0   24.50    5.00
  12 -10   0   17.50    3.90
 -12 -10   0   17.50    3.70
  12  10   0   19.00    1.40
  12  10   0   18.50    4.00
  12  10   0   17.30    3.50
  12  10   0   21.60    1.80
  13 -10   0   20.20    4.10
 -13 -10   0    7.20    3.50
 -13 -10   0    9.10    2.20
  13 -10   0   14.60    4.60
  13  10   0   10.50    2.60
  13  10   0   14.40    1.20
  13  10   0   15.30    1.60
 -13  10   0   13.80    1.70
  13  10   0   11.70    3.70
 -14 -10   0   76.99    6.50
  14 -10   0  109.29    7.60
  14 -10   0  109.19   10.60
 -14 -10   0   78.19    7.70
  14  10   0   96.39    5.20
 -14  10   0   95.59    5.50
  14  10   0   87.39    8.60
  14  10   0   92.39    6.80
  14  10   0   92.69    4.90
  15 -10   0   41.00    9.00
 -15 -10   0   33.60    4.20
  15 -10   0   44.90    5.50
 -15 -10   0   31.00    5.70
  15  10   0   36.20    6.60
  15  10   0   34.20    2.90
  15  10   0   36.60    2.20
 -15  10   0   39.10    2.90
  15  10   0   41.30    4.70
   0 -11   0   -1.10    0.80
   0  11   0   -1.70    1.10
   1 -11   0  111.19    6.10
  -1 -11   0  101.79    6.10
   1  11   0  107.29    6.60
  -1  11   0  113.09    6.70
   2 -11   0   48.90    3.30
  -2 -11   0   50.09    3.50
  -2  11   0   44.00    4.10
   2  11   0   50.49    3.80
   3 -11   0   85.09    5.00
  -3 -11   0   90.69    5.30
   3 -11   0   85.19    5.20
   3  11   0   92.29    5.50
  -3  11   0   82.69    5.70
   4 -11   0  146.19    8.10
  -4 -11   0  142.09    8.20
   4  11   0  151.88    8.20
  -5 -11   0   69.69    5.00
  -5 -11   0   68.89    6.10
   5 -11   0   85.59    5.10
   5  11   0   80.39    4.90
   5  11   0   76.59    4.70
   6 -11   0  204.98   10.80
  -6 -11   0  189.48   10.60
  -6 -11   0  189.88   11.90
   6  11   0  190.88   10.30
   6  11   0  198.78   10.50
  -7 -11   0    0.00    3.10
  -7 -11   0   -0.80    1.30
   7 -11   0   -1.20    1.50
   7  11   0    0.90    1.20
   7  11   0   -0.10    0.50
   7  11   0   -0.40    1.00
   7  11   0    0.50    2.00
  -8 -11   0    0.70    2.30
   8 -11   0    1.10    1.80
  -8 -11   0    1.40    1.50
   8  11   0    2.50    0.60
   8  11   0    1.90    2.20
   8  11   0    2.70    1.00
   8  11   0    2.50    1.50
   9 -11   0   66.39    5.40
  -9 -11   0   58.99    6.30
  -9 -11   0   64.89    5.00
   9  11   0   67.19    4.20
   9  11   0   78.89    6.40
   9  11   0   71.99    5.50
   9  11   0   68.99    3.80
 -10 -11   0   -1.20    2.60
 -10 -11   0    0.10    1.70
  10  11   0    5.00    2.80
  10  11   0    1.70    0.60
  10  11   0    2.80    1.70
  10  11   0    1.40    1.00
 -10  11   0    1.10    1.20
 -11 -11   0   -0.70    2.60
  11 -11   0    2.40    3.60
 -11 -11   0    1.40    1.70
  11 -11   0    1.80    2.20
 -11  11   0    0.90    1.00
  11  11   0    1.30    0.50
  11  11   0    1.80    2.90
  11  11   0    0.60    0.90
  11  11   0    1.40    1.80
 -12 -11   0   33.70    5.20
  12 -11   0   35.10    4.80
 -12 -11   0   36.30    3.90
  12 -11   0   34.00    7.20
  12  11   0   36.80    4.10
  12  11   0   34.00    6.10
  12  11   0   43.30    2.30
 -12  11   0   43.30    3.00
  13 -11   0   40.70    5.50
 -13 -11   0   40.80    5.90
  13 -11   0   44.60    8.00
 -13 -11   0   40.40    5.40
  13  11   0   48.80    6.50
  13  11   0   44.40    2.60
  13  11   0   44.90    3.10
 -13  11   0   44.40    3.20
  13  11   0   50.39    4.80
  14 -11   0   21.70    4.70
 -14 -11   0   19.00    4.70
 -14 -11   0   11.40    2.70
  14 -11   0   19.50    5.50
  14  11   0   14.70    1.30
  14  11   0   26.30    5.70
 -14  11   0   16.80    2.00
  14  11   0   14.60    1.80
  14  11   0   21.60    4.00
 -15 -11   0    6.50    4.10
  15 -11   0    9.40    3.10
 -15 -11   0    8.40    2.40
  15 -11   0   10.20    5.20
  15  11   0   11.10    2.90
  15  11   0   13.20    4.30
 -15  11   0   11.10    2.50
 -15  11   0   10.40    1.80
  15  11   0   11.80    1.60
  15  11   0   11.40    1.10
   0 -12   0  453.05   23.50
   0  12   0  482.15   24.20
  -1 -12   0  233.38   12.30
   1 -12   0  226.68   12.20
  -1  12   0  231.58   12.90
   1  12   0  241.58   12.80
   2 -12   0   71.79    4.10
  -2 -12   0   57.29    4.20
   2  12   0   51.79    4.40
   3 -12   0   12.60    1.70
  -3  12   0    9.60    2.10
   4 -12   0    7.40    1.50
  -4 -12   0    5.70    1.60
  -4  12   0    7.30    1.90
   4  12   0    7.90    1.60
   5 -12   0   34.40    3.30
  -5 -12   0   35.10    3.40
   5  12   0   33.50    2.90
   5  12   0   41.10    3.10
   6 -12   0  122.79    7.40
  -6 -12   0  117.29    7.20
  -6 -12   0  117.49    8.50
   6  12   0  113.89    6.80
   6  12   0  123.59    6.90
  -7 -12   0   19.50    2.90
   7 -12   0   16.00    3.90
  -7 -12   0   18.40    3.80
   7  12   0   21.80    2.30
   7  12   0   21.50    2.60
   7  12   0   18.00    1.60
  -8 -12   0  180.28   10.40
   8 -12   0  193.88   10.70
  -8 -12   0  166.98   11.60
   8  12   0  185.58   10.00
   8  12   0  183.38    9.40
   8  12   0  198.58   11.30
   8  12   0  178.68   10.80
  -9 -12   0   10.00    3.40
  -9 -12   0   15.90    3.10
   9  12   0   15.80    1.50
   9  12   0   22.80    4.60
   9  12   0   14.90    2.30
 -10 -12   0   14.90    4.00
  10 -12   0   21.10    4.10
 -10 -12   0   14.50    2.60
  10  12   0   20.40    2.10
  10  12   0   12.80    3.30
  10  12   0   20.40    3.90
  10  12   0   19.00    1.50
  11 -12   0   72.79    6.60
 -11 -12   0  100.49    7.80
  11  12   0  104.89    8.00
  11  12   0   82.79    5.00
 -11  12   0   73.99    5.10
  11  12   0   83.19    4.50
 -12 -12   0   35.60    5.50
  12 -12   0   37.00    4.80
  12  12   0   25.90    3.90
  12  12   0   32.10    5.90
  12  12   0   34.80    2.60
  12  12   0   33.00    2.10
 -12  12   0   37.10    2.80
 -13 -12   0    2.10    2.10
  13 -12   0    9.10    3.20
 -13 -12   0    2.60    3.30
 -13  12   0    3.50    1.20
  13  12   0    1.50    1.00
  13  12   0    3.10    2.10
  13  12   0    3.80    3.00
 -14 -12   0   28.50    4.20
 -14 -12   0   24.90    5.20
  14  12   0   33.20    2.10
 -14  12   0   36.90    2.80
  14  12   0   28.40    4.30
  14  12   0   32.30    2.60
  14  12   0   36.50    5.90
   0 -13   0   10.20    2.10
  -1 -13   0   87.29    5.70
   1 -13   0   90.89    5.60
  -1  13   0  108.39    7.70
   2 -13   0    9.30    1.90
  -2  13   0    6.90    2.10
   3 -13   0   95.59    5.30
  -3 -13   0   76.39    5.50
   3  13   0   83.09    6.60
  -3  13   0   89.69    6.10
  -4 -13   0  352.26   19.10
  -4  13   0  386.06   19.70
   4  13   0  368.26   19.30
   5 -13   0  137.79    8.20
  -5 -13   0  141.49    8.40
  -5  13   0  145.39    8.80
   5  13   0  144.09    8.20
   6 -13   0    1.30    1.70
  -6 -13   0    3.60    1.70
  -6  13   0    3.10    1.80
   6  13   0    2.50    1.30
   6  13   0    4.30    1.40
   7 -13   0   60.79    5.30
  -7 -13   0   61.69    4.80
   7  13   0   58.59    3.60
   7  13   0   60.09    4.20
   7  13   0   62.59    4.20
  -7  13   0   63.59    5.00
   8 -13   0   38.40    4.20
  -8 -13   0   33.90    3.90
  -8 -13   0   31.00    4.90
   8  13   0   38.60    3.00
   8  13   0   35.10    3.40
   8  13   0   37.50    2.50
   9 -13   0    4.50    2.20
  -9 -13   0    0.30    1.80
  -9 -13   0    1.50    2.80
   9  13   0    3.10    0.80
   9  13   0    3.60    2.10
   9  13   0    3.80    1.30
   9  13   0    4.20    2.80
 -10 -13   0   41.40    5.70
  10 -13   0   50.89    5.00
 -10 -13   0   45.40    4.50
  10  13   0   46.60    3.40
  10  13   0   49.30    2.90
  10  13   0   43.70    4.20
  10  13   0   46.80    5.80
  11 -13   0    2.60    2.30
 -11 -13   0    3.10    2.10
 -11 -13   0    1.40    3.10
  11  13   0    4.30    0.70
  11  13   0    4.60    3.00
  11  13   0    4.90    2.00
 -11  13   0    1.50    2.00
  11  13   0    5.80    1.30
 -11  13   0    5.60    1.30
  12 -13   0    4.30    2.50
 -12 -13   0   -0.10    2.00
 -12 -13   0    0.90    3.00
 -12  13   0    1.30    1.00
  12  13   0    0.60    0.90
  12  13   0    1.10    2.90
  12  13   0   -1.30    1.90
  12  13   0    0.40    0.50
 -13 -13   0   26.40    4.10
  13 -13   0   33.40    5.30
  13  13   0   30.30    5.60
 -13  13   0   39.60    4.40
  13  13   0   34.40    2.60
  13  13   0   31.50    2.10
 -13  13   0   31.20    2.80
  13  13   0   32.90    4.20
   0 -14   0   79.19    5.20
   0  14   0   79.19    5.80
   1 -14   0  254.67   12.60
  -1 -14   0  228.28   12.70
   1  14   0  225.98   13.10
   2 -14   0   59.19    4.10
  -2 -14   0   63.99    4.40
  -2  14   0   53.29    4.80
   3 -14   0  110.89    6.00
  -3 -14   0   94.09    6.30
   3  14   0   92.19    6.40
  -3  14   0  102.69    6.80
  -4 -14   0   30.60    3.40
  -4  14   0   23.40    3.40
   4  14   0   24.70    3.00
  -5 -14   0   18.50    3.10
  -5  14   0   23.20    3.40
   5  14   0   19.10    2.60
  -6 -14   0   38.80    3.90
   6 -14   0   37.50    3.90
  -6  14   0   38.00    4.10
   6  14   0   37.60    3.30
   7 -14   0   38.50    4.30
  -7 -14   0   44.20    4.20
   7  14   0   46.10    3.50
   7  14   0   44.50    2.90
  -7  14   0   48.10    4.50
   8 -14   0    0.30    1.90
  -8 -14   0    0.70    1.90
   8  14   0    1.90    1.30
   8  14   0    1.60    1.70
  -8  14   0    1.00    2.00
   8  14   0    0.40    0.80
   9 -14   0  159.78    9.90
  -9 -14   0  155.38    9.80
   9  14   0  149.39    9.30
   9  14   0  170.18    8.90
  -9  14   0  159.08    9.90
   9  14   0  163.88    8.30
  10 -14   0   15.70    4.00
 -10 -14   0   17.90    3.70
  10  14   0   18.00    3.20
  10  14   0   14.50    1.60
  10  14   0   15.60    2.10
 -11 -14   0    7.40    2.30
  11 -14   0    9.30    2.80
 -11  14   0   13.30    2.00
  11  14   0   10.30    1.70
 -11  14   0   12.40    2.90
  11  14   0   10.60    2.40
  11  14   0   10.50    1.30
 -12 -14   0    5.50    2.40
  12  14   0    5.30    2.20
  12  14   0    5.70    3.10
  12  14   0    6.70    1.40
  12  14   0    7.30    1.20
 -12  14   0    5.70    1.50
 -12  14   0    5.70    2.50
 -13 -14   0    3.20    2.40
  13 -14   0    5.30    2.80
 -13  14   0    6.30    1.50
  13  14   0    4.10    3.30
  13  14   0    4.50    1.30
  13  14   0    6.10    2.30
   0 -15   0    0.70    1.20
   0  15   0    2.40    1.70
  -1 -15   0   33.40    3.40
   1 -15   0   36.90    3.30
   1  15   0   39.10    3.80
  -1  15   0   36.70    4.00
  -2 -15   0   15.50    2.70
   2 -15   0   11.50    2.20
  -2  15   0   13.80    2.70
   2  15   0   11.90    2.40
  -3 -15   0    3.60    1.70
  -3  15   0    3.40    2.10
   3  15   0    3.20    1.70
  -4 -15   0   29.40    3.60
  -4  15   0   32.10    4.00
   4  15   0   29.40    3.40
  -5 -15   0  192.48   11.00
   5  15   0  194.28   10.80
  -5  15   0  188.68   11.40
  -6 -15   0   93.99    7.10
  -6  15   0   95.99    6.80
   6  15   0   97.19    6.00
   6  15   0   85.59    5.20
  -7 -15   0   44.50    4.40
   7 -15   0   50.49    4.60
  -7  15   0   49.10    4.60
   7  15   0   41.70    3.00
   7  15   0   45.60    3.70
  -8 -15   0    2.40    2.00
   8 -15   0   -0.90    2.00
  -8  15   0    0.80    2.10
   8  15   0    1.80    0.80
   8  15   0    1.60    1.30
   9 -15   0    7.00    2.50
  -9 -15   0    7.00    2.40
   9  15   0    8.10    1.70
   9  15   0    9.70    1.70
 -10 -15   0   -1.10    2.00
  10 -15   0   -0.50    2.10
  10  15   0   -0.10    1.10
  10  15   0    1.10    1.70
  10  15   0    1.00    0.80
 -10  15   0    4.30    2.20
  11 -15   0    1.70    2.30
 -11 -15   0   -2.30    2.00
  11  15   0    0.70    1.00
 -11  15   0    0.30    1.10
  11  15   0   -0.60    1.80
  11  15   0    0.20    0.60
 -11  15   0    6.10    2.50
  12 -15   0   21.20    4.70
 -12 -15   0   19.70    4.00
  12  15   0   24.20    3.50
  12  15   0   23.40    2.40
 -12  15   0   28.30    4.20
  12  15   0   24.10    1.90
 -12  15   0   24.60    2.60
   0 -16   0  162.58    9.50
   0  16   0  172.78   10.30
   1 -16   0   35.70    3.40
   1  16   0   28.50    3.90
  -1  16   0   35.00    4.20
  -2 -16   0   85.09    6.30
   2 -16   0   93.89    5.80
  -2  16   0   93.79    6.70
   2  16   0   85.39    6.20
  -3 -16   0    8.40    2.70
  -3  16   0    4.70    2.20
   3  16   0    7.00    2.00
  -4 -16   0   13.20    2.40
   4  16   0   15.00    2.50
  -4  16   0   11.20    2.80
  -5 -16   0    3.60    1.80
  -5  16   0   -0.30    1.90
   5  16   0    1.60    1.40
  -6 -16   0   37.30    4.20
   6  16   0   39.50    3.50
   6  16   0   39.00    3.00
  -6  16   0   37.30    4.40
  -7 -16   0   18.70    3.70
  -7  16   0   15.90    3.20
   7  16   0   15.30    1.90
   7  16   0   17.60    2.60
  -8 -16   0   70.79    6.00
   8 -16   0   71.49    6.30
   8  16   0   77.49    5.20
  -8  16   0   74.89    6.20
   8  16   0   75.09    4.40
   9 -16   0   51.29    5.80
  -9 -16   0   61.99    5.50
   9  16   0   69.69    4.60
  -9  16   0   65.69    5.80
   9  16   0   62.19    3.80
  10 -16   0   16.00    3.20
 -10 -16   0   13.20    3.00
 -10  16   0   23.50    3.80
  10  16   0   21.20    2.50
  10  16   0   19.80    1.80
   0 -17   0    2.50    1.60
   0  17   0    2.10    2.10
   1 -17   0   13.40    2.70
  -1 -17   0    6.60    1.90
  -1  17   0    8.00    2.40
   1  17   0    7.00    2.40
  -2 -17   0   25.40    3.40
   2  17   0   21.10    3.30
  -2  17   0   32.60    3.90
  -3 -17   0   16.50    3.20
  -3  17   0    9.70    2.60
   3  17   0   10.20    2.30
  -4 -17   0  150.68    9.20
   4  17   0  152.88    9.20
  -4  17   0  146.79    9.70
  -5  17   0    0.70    2.00
   5  17   0    0.40    1.50
  -6 -17   0    4.80    2.20
   6  17   0    6.50    1.80
   6  17   0    3.60    1.00
  -6  17   0    4.10    2.40
  -7 -17   0    0.80    2.10
  -7  17   0   -1.30    2.10
   7  17   0    0.10    0.90
   7  17   0    1.60    1.50
  -8 -17   0   74.59    6.00
   8  17   0   70.69    4.30
   8  17   0   70.09    5.10
  -8  17   0   66.89    6.10
   9 -17   0    7.90    2.60
  -9 -17   0    6.20    2.50
  -9  17   0   10.10    4.60
   9  17   0    6.90    1.70
   9  17   0   10.50    1.70
   0 -18   0  200.08   10.70
   0  18   0  166.18   11.10
   1 -18   0   40.60    3.80
  -1  18   0   37.50    4.40
   1  18   0   35.30    4.10
  -2 -18   0    3.90    1.80
   2  18   0    1.50    1.80
  -2  18   0   -1.80    1.70
  -3 -18   0    5.70    2.10
  -3  18   0    3.40    2.20
   3  18   0    6.50    2.20
  -4 -18   0   33.80    4.00
   4  18   0   29.70    3.60
  -4  18   0   26.70    4.10
  -5 -18   0   21.50    3.70
  -5  18   0   14.60    3.30
   5  18   0   17.80    3.00
  -6 -18   0    2.00    2.20
   6  18   0    3.70    1.80
   6  18   0    2.50    1.00
  -7 -18   0   14.60    3.00
  -7  18   0   14.60    3.40
   7  18   0   13.30    3.00
   7  18   0   15.80    2.10
   0 -19   0    3.00    1.70
   0  19   0   -0.10    1.90
   1 -19   0   29.80    3.50
  -1 -19   0   25.60    3.60
   1  19   0   26.60    4.30
  -1  19   0   27.70    3.90
  -2 -19   0    4.70    2.00
  -2  19   0    5.40    2.20
   2  19   0    3.50    1.90
  -3 -19   0   -1.30    1.60
   3  19   0   -0.40    1.60
  -3  19   0   -1.50    1.90
  -4 -19   0   11.70    2.60
   4  19   0    9.10    2.40
  -4  19   0    9.40    2.70
  -5 -19   0   31.40    4.20
   5  19   0   31.30    3.70
   5  19   0   30.60    2.80
  -5  19   0   29.60    4.20
   0 -20   0    5.00    1.90
 -18   0   1   -0.40    0.80
 -18   0   1    0.80    1.70
  18   0  -1   -1.80    2.30
  18   0  -1    1.60    3.60
  17   0  -1    5.40    2.60
 -17   0   1    8.10    2.30
 -17   0   1    7.80    1.40
  17   0  -1    5.30    4.30
  16   0  -1    4.10    3.90
  16   0  -1   -0.60    2.10
 -16   0   1   -1.20    0.70
 -16   0   1   -1.80    2.20
 -15   0   1    5.90    1.80
  15   0  -1    6.80    2.40
 -15   0   1    5.90    1.10
  15   0  -1   14.40    4.20
 -14   0   1    0.90    1.20
  14   0  -1    3.50    1.90
  14   0  -1    8.80    3.20
  13   0  -1   28.40    5.60
  13   0  -1   26.00    3.70
 -12   0   1    1.00    0.60
  12   0  -1   -3.00    2.20
 -12   0   1    0.80    0.90
 -11   0   1   95.89    5.40
  11   0  -1   86.29    7.20
 -11   0   1   94.69    4.90
  11   0  -1   86.29    5.80
   9   0  -1  517.35   27.10
   9   0  -1  534.45   26.20
  -9   0   1  515.85   25.90
  -9   0   1  511.85   25.50
  -8   0   1    3.30    0.60
   8   0  -1    3.70    1.70
  -7   0   1  112.59    5.80
   7   0  -1  110.29    7.10
   7   0  -1  119.69    6.00
  -7   0   1  115.79    6.10
   7   0  -1  114.29    6.30
  -5   0   1   35.80    2.90
   4   0  -1    1.70    0.60
   4   0  -1    1.00    0.30
  -4   0   1    1.40    0.60
   3   0  -1  312.77   15.20
  -3   0   1  301.37   15.60
  -3   0   1  290.67   15.20
   3   0  -1  331.37   15.60
  -2   0   1    0.90    0.30
   2   0  -1    0.60    0.10
   2   0  -1    0.30    0.30
  -2   0   1    0.90    0.20
   1   0   1  638.34   31.30
  -2   0  -1    0.60    0.10
   2   0   1    0.70    0.10
   2   0   1    0.80    0.10
  -2   0  -1    0.70    0.30
   2   0   1    0.60    0.30
  -3   0  -1  426.16   20.80
   3   0   1  423.66   20.80
  -3   0  -1  429.86   21.50
   3   0   1  407.86   20.80
   3   0   1  447.06   21.50
  -4   0  -1    2.60    0.40
  -4   0  -1    2.60    0.40
  -5   0  -1 3356.16  164.08
  -6   0  -1    1.40    0.40
   6   0   1    0.70    0.30
   6   0   1    0.30    0.30
  -6   0  -1    0.90    0.30
   7   0   1  640.84   31.00
  -7   0  -1  607.54   30.40
  -7   0  -1  614.84   30.50
  -7   0  -1  632.84   30.70
   7   0   1  636.44   30.50
   7   0   1  609.24   31.80
   8   0   1    1.60    0.60
   9   0   1 2345.77  110.89
   9   0   1 2324.97  110.69
   9   0   1 2247.68  112.29
  -9   0  -1 2182.68  110.69
 -11   0  -1   22.70    1.50
 -11   0  -1   21.80    1.90
  11   0   1   19.10    3.50
  11   0   1   15.80    2.70
  11   0   1   21.30    1.30
 -13   0  -1   24.00    2.80
 -13   0  -1   24.70    2.10
  14   0   1   92.89    6.80
  14   0   1  103.89    9.10
 -15   0  -1   46.90    3.80
 -15   0  -1   47.00    3.10
  15   0   1   44.80    4.70
  15   0   1   43.30    6.90
  16   0   1    1.90    2.30
 -16   0  -1    1.50    0.80
 -16   0  -1    1.50    1.40
  16   0   1    3.30    3.70
  17   0   1  143.79   12.40
 -17   0  -1  146.49    8.80
  17   0   1  144.29    9.50
 -17   0  -1  137.99    7.80
  18   0   1   11.30    4.60
  18   0   1    6.70    2.60
 -18  -1   1    4.00    1.20
 -18  -1   1    6.30    2.30
  18  -1  -1    5.90    4.50
  18  -1  -1    5.30    2.60
  18   1  -1    8.10    4.60
 -18   1   1    4.40    1.10
 -18   1   1    5.20    2.00
  18   1  -1    4.00    2.40
  17  -1  -1    8.30    2.70
  17  -1  -1    9.30    4.30
 -17  -1   1   11.20    1.90
 -17  -1   1   14.90    2.80
 -17   1   1   11.60    1.70
  17   1  -1    9.50    2.90
  17   1  -1   16.30    4.80
 -17   1   1   14.90    2.70
  16  -1  -1    1.30    3.80
  16  -1  -1    0.30    2.20
 -16  -1   1    2.40    1.10
 -16  -1   1    1.50    2.00
 -16   1   1    3.10    1.00
  16   1  -1    4.50    3.90
 -16   1   1    3.20    1.60
  16   1  -1    2.10    2.30
 -15  -1   1   24.90    3.10
  15  -1  -1   22.70    3.80
  15  -1  -1   29.70    6.50
 -15  -1   1   25.50    2.30
  15   1  -1   29.50    6.30
 -15   1   1   25.90    2.10
  15   1  -1   27.90    4.10
 -15   1   1   24.50    2.80
  14  -1  -1   40.30    4.40
 -14  -1   1   40.80    3.60
 -14  -1   1   43.10    2.90
  14  -1  -1   49.40    6.80
 -14   1   1   39.00    3.30
  14   1  -1   43.30    6.20
  14   1  -1   40.50    4.30
 -14   1   1   41.40    2.70
  13  -1  -1   53.99    6.70
  13  -1  -1   52.79    4.80
 -13  -1   1   59.69    4.20
 -13  -1   1   53.89    4.00
  13   1  -1   45.80    4.60
 -13   1   1   55.49    3.20
  13   1  -1   39.40    6.30
 -13   1   1   58.99    3.80
 -12  -1   1    2.80    1.10
  12  -1  -1    2.70    2.70
 -12  -1   1    3.20    0.70
  12  -1  -1    1.20    1.60
 -12   1   1    1.70    0.50
  12   1  -1    2.00    2.70
  12   1  -1    1.60    1.70
 -12   1   1    1.80    0.90
 -11  -1   1    1.90    1.00
  11  -1  -1    0.10    2.10
  11  -1  -1    0.60    1.30
 -11  -1   1    1.20    0.50
 -11   1   1   -0.20    0.70
 -10  -1   1  256.37   12.80
  10  -1  -1  245.28   14.60
 -10  -1   1  251.67   13.30
  10  -1  -1  271.47   13.60
 -10   1   1  248.68   12.70
 -10   1   1  248.58   13.10
  10   1  -1  255.87   14.60
  10   1  -1  271.67   14.90
   9  -1  -1  314.17   15.20
  -9  -1   1  282.57   14.90
   9  -1  -1  301.17   16.30
  -9  -1   1  283.27   14.50
   9   1  -1  303.87   16.20
   9   1  -1  297.57   15.10
  -9   1   1  277.07   14.40
  -9   1   1  275.87   14.80
   8  -1  -1  182.38   10.40
  -8  -1   1  201.48   10.30
   8  -1  -1  178.28   11.20
  -8  -1   1  200.28    9.90
   8   1  -1  217.18   11.50
   8   1  -1  227.58   10.50
  -8   1   1  180.68    9.80
  -8   1   1  185.88   10.10
   7  -1  -1    6.30    1.20
   7  -1  -1    5.80    1.70
   7  -1  -1    6.30    0.80
  -7  -1   1    5.80    0.90
   7   1  -1    7.00    1.20
   7   1  -1    7.10    0.80
  -7   1   1    6.50    0.80
   7   1  -1    6.80    1.80
  -7   1   1    5.90    0.60
  -6  -1   1    0.30    0.50
   6  -1  -1    1.80    0.40
  -6   1   1    1.80    0.30
   6   1  -1    1.30    0.50
   6   1  -1    2.20    1.20
  -6   1   1    1.50    0.30
   6   1  -1    2.30    0.70
  -6   1   1    1.50    0.40
  -5  -1   1 1675.83   83.19
   5  -1  -1 1719.93   83.09
   5   1  -1 1754.42   83.09
  -5   1   1 1613.24   83.09
  -4  -1   1  601.54   29.50
   4  -1  -1  591.44   29.00
   4  -1  -1  590.64   29.40
   4  -1  -1  594.24   28.90
  -4  -1   1  584.74   28.90
  -4   1   1  548.45   29.70
  -4   1   1  574.24   28.90
   4   1  -1  609.24   29.40
   4   1  -1  609.94   28.90
   3  -1  -1    6.40    0.90
  -3  -1   1    6.50    0.90
  -3  -1   1    5.50    0.50
   3  -1  -1    5.50    0.50
   3   1  -1    7.70    1.00
  -3   1   1    5.40    0.90
   3   1  -1    6.00    0.50
  -3   1   1    7.00    0.50
   2  -1  -1   88.39    4.40
  -2  -1   1   79.59    4.30
  -2  -1   1   80.49    4.20
  -2   1   1   78.39    4.30
  -2   1   1   76.19    4.10
   2   1  -1   81.69    4.30
   2   1  -1   84.19    4.10
   1  -1  -1  554.84   25.50
  -1  -1   1  532.45   25.50
   1   1  -1  472.45   25.40
   1  -1   1 1216.18   64.69
  -1   1  -1 1200.98   64.69
  -2  -1  -1   34.40    2.10
   2  -1   1   29.90    2.00
  -2  -1  -1   30.40    1.60
  -2  -1  -1   32.30    1.70
   2   1   1   35.60    2.10
   2   1   1   32.70    1.70
   2   1   1   28.30    1.60
  -2   1  -1   27.90    2.00
  -2   1  -1   31.20    1.60
  -3  -1  -1  551.14   26.90
  -3  -1  -1  510.65   26.30
   3  -1   1  518.65   26.70
  -3  -1  -1  556.44   26.40
   3  -1   1  536.25   26.30
  -3   1  -1  517.15   26.80
   3   1   1  562.54   26.30
   3   1   1  574.74   26.90
  -3   1  -1  515.65   26.20
   4  -1   1 1400.66   69.49
  -4  -1  -1 1411.86   69.89
  -4   1  -1 1354.06   69.89
   4   1   1 1487.95   69.59
  -5  -1  -1  893.71   45.10
  -5  -1  -1  859.11   44.00
  -5  -1  -1  934.71   44.20
   5  -1   1  950.00   44.30
   5  -1   1  881.91   44.00
   5  -1   1  920.61   44.90
   5  -1   1  847.22   44.00
  -5   1  -1  836.92   44.00
   5   1   1  865.01   44.00
  -5   1  -1  936.91   45.10
   5   1   1  935.91   44.30
   5   1   1  953.00   45.00
   5   1   1  916.51   44.00
   6  -1   1  361.26   18.70
   6  -1   1  369.36   18.40
  -6  -1  -1  381.76   18.50
  -6  -1  -1  363.96   18.30
   6   1   1  387.46   18.40
  -6   1  -1  366.36   18.30
   6   1   1  376.26   18.30
   6   1   1  376.36   18.70
  -6   1  -1  366.36   18.40
   7  -1   1  454.15   24.70
  -7  -1  -1  486.65   23.50
  -7  -1  -1  473.15   23.50
   7  -1   1  464.15   23.80
   7  -1   1  487.45   24.00
   7  -1   1  477.45   23.40
  -7  -1  -1  488.45   23.80
   7   1   1  500.55   24.00
  -7   1  -1  485.45   23.60
   7   1   1  486.25   24.80
  -7   1  -1  468.95   23.50
   7   1   1  473.55   23.50
   7   1   1  510.25   23.60
   7   1   1  453.25   23.40
  -7   1  -1  470.15   23.40
   8  -1   1  190.98    9.90
   8  -1   1  170.68    9.40
   8  -1   1  193.28   10.90
  -8  -1  -1  210.08    9.30
  -8  -1  -1  180.38    9.30
   8  -1   1  172.28    9.10
  -8  -1  -1  212.18    9.70
  -8   1  -1  175.28    9.40
   8   1   1  198.58    9.40
   8   1   1  185.28    9.10
  -8   1  -1  160.88    9.20
   8   1   1  186.28    9.20
  -8   1  -1  167.88    9.20
   9  -1   1   18.60    1.40
  -9   1  -1   18.70    1.40
  -9   1  -1   17.20    1.70
   9   1   1   20.30    1.20
   9   1   1   20.40    1.40
  10  -1   1  183.18    9.80
 -10  -1  -1  190.78   10.30
 -10  -1  -1  196.88    9.80
  10  -1   1  193.68   10.60
  10  -1   1  182.58   11.70
 -10  -1  -1  180.98    9.80
 -10   1  -1  181.88    9.70
  10   1   1  210.08   11.90
  10   1   1  208.88   10.70
 -10   1  -1  195.88   10.10
 -10   1  -1  196.38    9.70
  10   1   1  203.58    9.80
 -11  -1  -1   10.30    1.50
 -11  -1  -1   11.10    1.10
  11  -1   1   13.80    3.00
 -11   1  -1   13.80    1.40
 -11   1  -1   12.80    1.00
  11   1   1   10.30    1.30
  11   1   1    7.40    3.00
  11   1   1   10.40    0.80
 -12  -1  -1  198.98    9.80
 -12  -1  -1  195.48    9.10
  12  -1   1  155.88   10.00
  12  -1   1  150.38   12.80
 -12   1  -1  162.08    9.40
  12   1   1  198.68   12.10
 -12   1  -1  159.48    8.90
  12   1   1  183.88    8.80
  13  -1   1  532.25   26.80
 -13  -1  -1  537.35   26.50
  13  -1   1  450.15   25.50
  13  -1   1  504.45   28.50
 -13  -1  -1  525.75   25.80
 -13   1  -1  537.25   26.20
  13   1   1  517.95   28.40
 -13   1  -1  547.65   25.70
  13   1   1  527.35   26.70
  13   1   1  514.25   25.40
 -14  -1  -1   90.69    5.50
 -14  -1  -1   95.29    6.40
  14  -1   1  100.89    6.90
  14  -1   1  119.19    9.30
  14   1   1  102.09    5.10
 -14   1  -1   93.69    6.00
 -14   1  -1   92.89    5.40
  15  -1   1   19.60    4.80
 -15  -1  -1   18.70    1.90
  15  -1   1   18.10    3.60
 -15  -1  -1   16.40    2.60
  15  -1   1   13.80    1.50
  15   1   1   20.20    3.70
 -15   1  -1   17.80    2.60
 -15   1  -1   20.70    2.40
  15   1   1   25.10    5.00
 -16  -1  -1   31.60    3.40
  16  -1   1   30.70    5.60
 -16  -1  -1   26.90    2.40
  16  -1   1   25.30    4.40
 -16   1  -1   29.00    2.20
  16   1   1   28.40    5.60
 -16   1  -1   31.50    3.00
  16   1   1   29.60    4.40
  17  -1   1   86.69    9.60
 -17  -1  -1   62.99    4.60
  17  -1   1   81.19    6.50
 -17  -1  -1   65.09    5.70
  17   1   1   92.19    9.40
 -17   1  -1   65.39    4.40
  17   1   1   83.59    6.60
 -17   1  -1   71.89    5.30
 -18  -1  -1   25.60    3.80
  18  -1   1   14.70    4.70
  18  -1   1   22.30    4.50
 -18  -1  -1   20.80    2.50
 -18  -2   1   43.00    4.40
  18  -2  -1   35.50    5.10
  18  -2  -1   41.90    8.30
 -18  -2   1   37.40    3.30
 -18   2   1   44.70    4.00
 -18   2   1   37.00    2.80
  18   2  -1   40.90    5.10
  18   2  -1   44.30    7.50
  17  -2  -1   24.80    4.40
  17  -2  -1   28.20    5.80
 -17  -2   1   23.80    2.70
 -17  -2   1   28.80    3.80
 -17   2   1   29.40    2.30
  17   2  -1   21.40    4.50
 -17   2   1   30.30    3.20
  17   2  -1   23.40    5.50
 -16  -2   1   12.10    2.00
 -16  -2   1   14.80    2.90
 -16   2   1   15.30    2.60
  16   2  -1   10.30    2.70
 -16   2   1   16.00    1.70
  16   2  -1   13.80    4.90
 -15  -2   1   20.90    2.20
  15  -2  -1   26.90    4.30
 -15  -2   1   19.10    3.10
  15  -2  -1   30.40    5.60
  15   2  -1   25.20    5.00
 -15   2   1   21.40    2.50
 -15   2   1   23.20    1.90
  15   2  -1   22.90    4.00
 -14  -2   1   60.09    3.60
  14  -2  -1   57.99    7.30
  14  -2  -1   51.89    4.90
 -14  -2   1   56.39    4.40
 -14   2   1   50.69    3.20
 -14   2   1   50.49    3.80
  13  -2  -1   87.79    8.30
  13  -2  -1   84.49    6.30
 -13  -2   1   90.39    5.90
 -13  -2   1   91.19    5.10
 -13   2   1   84.09    5.30
 -13   2   1   77.59    4.80
  13   2  -1  103.09    6.40
  13   2  -1  105.39    8.40
 -12  -2   1    4.20    1.50
 -12  -2   1    4.20    0.90
  12   2  -1    2.80    2.90
 -12   2   1    5.00    1.10
 -12   2   1    6.20    0.90
 -11  -2   1   55.29    3.80
  11  -2  -1   51.79    5.70
  11  -2  -1   50.99    4.30
 -11  -2   1   55.19    3.20
  11   2  -1   49.99    5.50
  11   2  -1   48.70    4.10
 -11   2   1   52.29    2.90
 -11   2   1   51.39    3.30
  10  -2  -1   13.60    2.60
  -9  -2   1    5.50    0.90
  -9  -2   1    4.10    1.10
   9  -2  -1    8.70    2.20
  -9   2   1    6.10    1.00
  -9   2   1    4.80    0.70
  -8  -2   1    7.30    1.30
  -8   2   1    5.10    0.80
  -8   2   1    3.20    0.50
  -8   2   1    4.50    0.60
  -7  -2   1  184.58    9.80
   7  -2  -1  179.68    9.60
  -7  -2   1  188.88    9.20
  -7  -2   1  160.58    9.10
   7  -2  -1  167.78   10.30
  -7   2   1  180.98    9.30
   7   2  -1  195.88   10.40
   7   2  -1  186.08    9.00
   7   2  -1  195.68    9.60
  -7   2   1  177.38    9.00
  -6  -2   1  628.64   30.20
  -6  -2   1  623.64   30.60
   6  -2  -1  628.04   30.60
   6  -2  -1  638.54   31.30
  -6  -2   1  550.64   30.20
  -6   2   1  608.64   30.20
  -6   2   1  588.84   30.30
   6   2  -1  645.74   31.30
   6   2  -1  602.74   30.10
   6   2  -1  652.23   30.40
   6   2  -1  629.04   30.60
  -5  -2   1  211.88   11.40
   5  -2  -1  247.88   11.90
  -5  -2   1  220.28   12.40
  -5  -2   1  242.18   11.80
  -5  -2   1  238.88   11.50
   5  -2  -1  228.18   12.30
   5   2  -1  232.78   11.70
   5   2  -1  236.68   12.30
  -5   2   1  214.28   12.30
   5   2  -1  229.88   11.40
  -5   2   1  239.08   11.60
  -5   2   1  234.38   11.40
  -4  -2   1  814.62   38.90
  -4  -2   1  722.33   38.60
   4  -2  -1  781.22   39.30
  -4  -2   1  781.22   39.30
   4  -2  -1  795.62   38.80
   4   2  -1  748.83   38.50
   4   2  -1  867.21   38.80
   4   2  -1  813.72   39.20
  -4   2   1  798.12   39.50
  -3  -2   1  607.44   29.40
  -3  -2   1  586.94   29.60
  -3  -2   1  564.44   29.10
   3  -2  -1  623.14   29.70
   3   2  -1  628.24   29.60
   3   2  -1  557.84   29.10
  -3   2   1  564.54   29.60
   3   2  -1  640.54   29.30
   2  -2  -1  223.28   10.70
  -2  -2   1  204.98   10.50
  -2  -2   1  206.28   10.60
  -2   2   1  202.28   10.60
   2   2  -1  205.98   10.50
   2   2  -1  216.68   10.40
   2   2  -1  200.58   10.30
  -1  -2   1  481.55   24.20
  -1   2   1  509.05   24.30
   1   2  -1  487.55   24.20
   0  -2  -1 4734.83  253.47
   0   2  -1 5295.07  255.37
   0   2   1 4856.11  253.37
  -1  -2  -1  223.48   10.70
   1  -2   1  222.58   10.70
  -1  -2  -1  216.88   10.90
  -1  -2  -1  204.88   10.80
   1   2   1  216.28   10.90
   1   2   1  194.88   10.70
   1   2   1  230.28   10.70
  -1   2  -1  218.78   10.70
  -2  -2  -1  107.59    5.60
  -2  -2  -1  117.09    5.70
  -2  -2  -1  108.99    6.00
   2  -2   1  107.69    5.80
   2   2   1  109.39    5.60
  -2   2  -1  111.09    5.90
   2   2   1  114.29    5.70
   2   2   1  111.69    6.00
   3  -2   1   53.39    3.40
  -3  -2  -1   58.39    3.20
  -3  -2  -1   55.69    3.60
  -3  -2  -1   55.09    3.00
  -3   2  -1   55.79    3.50
   3   2   1   63.69    3.70
   3   2   1   55.59    3.00
   3   2   1   61.39    3.10
  -4  -2  -1  120.39    6.60
   4  -2   1  134.09    7.30
  -4  -2  -1  139.09    6.80
   4  -2   1  129.79    6.80
   4   2   1  124.29    6.50
   4   2   1  134.09    7.40
   4   2   1  123.29    6.80
  -4   2  -1  132.59    6.60
  -4   2  -1  130.39    6.60
   4   2   1  144.39    6.70
   5  -2   1  260.77   13.50
  -5  -2  -1  258.47   12.90
  -5  -2  -1  241.18   13.70
  -5  -2  -1  243.58   12.60
   5  -2   1  264.37   12.90
   5   2   1  268.27   13.70
   5   2   1  271.87   13.00
  -5   2  -1  249.08   12.60
  -5   2  -1  248.48   13.60
   5   2   1  239.58   12.60
   5   2   1  265.97   12.70
  -5   2  -1  244.18   12.60
   6  -2   1   95.19    4.70
  -6  -2  -1   95.79    5.10
   6  -2   1   85.89    5.10
  -6  -2  -1   98.39    4.80
   6  -2   1   85.89    6.30
  -6  -2  -1   86.29    4.80
   6   2   1   92.39    5.20
  -6   2  -1   95.49    4.80
   6   2   1   91.49    4.70
  -6   2  -1   94.19    4.70
   7  -2   1   46.10    3.10
   7  -2   1   43.30    2.40
  -7  -2  -1   45.20    2.50
   7  -2   1   42.60    4.00
  -7  -2  -1   46.60    2.90
   7   2   1   43.90    2.50
   7   2   1   42.70    2.40
   7   2   1   46.80    3.20
  -7   2  -1   40.70    2.40
   7   2   1   47.70    4.10
   7   2   1   40.30    2.30
  -7   2  -1   42.40    2.50
   8  -2   1 1404.96   68.29
  -8  -2  -1 1301.87   67.79
   8  -2   1 1400.76   67.69
   8  -2   1 1336.37   69.19
  -8  -2  -1 1403.46   67.89
  -8   2  -1 1330.57   67.79
   8   2   1 1457.35   67.89
   8   2   1 1407.26   69.29
   8   2   1 1457.95   68.39
   8   2   1 1409.86   67.79
   9  -2   1  241.78   13.00
  -9  -2  -1  226.18   11.10
   9  -2   1  234.08   11.80
  -9  -2  -1  222.78   11.60
  -9  -2  -1  194.28   11.00
   9   2   1  210.58   10.80
  -9   2  -1  201.38   11.00
   9   2   1  255.57   11.80
  -9   2  -1  200.08   10.90
   9   2   1  214.18   11.00
 -10  -2  -1  121.09    6.80
  10  -2   1  126.69    8.30
  10  -2   1  116.69    7.00
 -10  -2  -1  114.49    6.10
  10  -2   1  105.89    6.00
 -10  -2  -1  108.59    6.10
 -10   2  -1  117.09    6.30
  10   2   1  132.09    8.40
  10   2   1  127.99    7.00
 -10   2  -1  113.79    5.90
  10   2   1  110.79    5.90
 -11  -2  -1   35.90    2.20
  11  -2   1   31.90    2.00
  11  -2   1   26.70    3.50
 -11  -2  -1   35.50    2.80
  11  -2   1   22.60    4.80
  11   2   1   34.50    2.10
 -11   2  -1   37.50    2.40
  11   2   1   23.20    4.60
 -11   2  -1   36.00    2.00
  11   2   1   36.40    1.90
 -12  -2  -1  245.78   12.50
 -12  -2  -1  256.67   13.20
  12  -2   1  219.68   13.30
 -12   2  -1  238.18   12.20
 -12   2  -1  242.28   12.70
  12   2   1  250.27   12.10
  12   2   1  245.58   15.10
  12   2   1  248.18   13.40
  12   2   1  256.97   12.30
  13  -2   1   38.50    2.80
 -13  -2  -1   56.39    4.10
 -13   2  -1   39.40    2.60
 -13   2  -1   40.60    3.10
  14  -2   1  208.78   13.90
 -14  -2  -1  218.58   11.80
 -14  -2  -1  193.88   11.40
  14  -2   1  194.98   11.70
  14   2   1  196.48   10.10
  14   2   1  224.28   13.70
 -14   2  -1  195.08   10.30
 -14   2  -1  192.78   10.80
  14   2   1  203.98   11.70
  15  -2   1   12.40    4.10
  15  -2   1    7.10    2.70
 -15  -2  -1    4.20    1.90
 -15  -2  -1    4.90    1.20
  15   2   1    5.00    3.60
  15   2   1    3.40    2.30
 -15   2  -1    5.60    1.40
 -16  -2  -1   22.60    3.10
  16  -2   1   22.00    5.20
  16  -2   1   20.90    4.10
 -16  -2  -1   17.40    2.20
 -16   2  -1   18.00    1.70
  16   2   1   14.10    4.70
  16   2   1   14.40    3.20
 -16   2  -1   22.00    2.50
  17  -2   1   10.10    4.30
 -17   2  -1    7.80    1.50
 -17   2  -1    4.40    1.70
 -18  -2  -1   84.19    6.80
  18  -2   1   88.79    7.20
  18  -2   1   91.29    9.80
 -18  -2  -1   81.29    5.50
 -18   2  -1   87.29    5.10
  18   2   1   99.89    9.90
  18   2   1   93.39    7.30
 -18   2  -1  102.89    7.70
 -18  -3   1    2.30    1.40
  18  -3  -1    4.80    4.00
  18  -3  -1    2.00    2.50
 -18  -3   1    2.20    2.40
 -18   3   1    2.50    0.90
  18   3  -1    7.00    4.00
 -18   3   1    3.00    1.60
  18   3  -1    4.90    2.70
  17  -3  -1    5.40    4.50
 -17  -3   1    5.20    2.40
  17  -3  -1    3.40    2.50
 -17  -3   1    2.50    1.30
  17   3  -1    4.20    2.50
 -17   3   1    4.20    1.60
 -17   3   1    4.20    1.00
  17   3  -1    9.00    4.00
 -16  -3   1    3.20    2.40
 -16  -3   1    4.50    1.40
  16  -3  -1    7.70    4.50
  16  -3  -1    4.80    2.30
  16   3  -1    7.00    4.10
 -16   3   1    6.40    1.00
  16   3  -1    6.30    2.60
 -15  -3   1   27.00    2.60
  15  -3  -1   42.90    6.90
  15   3  -1   37.70    6.60
 -15   3   1   25.40    2.70
  15   3  -1   32.90    4.30
 -15   3   1   26.40    2.10
  14  -3  -1   83.19    6.00
 -14  -3   1   69.29    5.50
 -14  -3   1   70.69    4.50
 -14   3   1   69.19    4.60
 -14   3   1   68.99    4.10
  14   3  -1   84.89    5.90
 -13  -3   1  119.89    6.80
  13  -3  -1  129.89    9.90
 -13  -3   1  121.89    7.70
  13  -3  -1  113.19    7.80
  13   3  -1  135.79    9.80
 -13   3   1  136.69    7.20
  13   3  -1  122.49    7.80
 -13   3   1  120.99    7.00
 -12  -3   1   77.19    5.40
 -12  -3   1   94.19    5.70
  12  -3  -1   76.99    5.80
  12   3  -1   65.49    5.60
 -12   3   1   85.69    4.80
 -12   3   1   85.39    4.30
  12   3  -1   73.99    7.30
 -11  -3   1   97.39    5.50
 -11  -3   1   99.99    6.30
 -11   3   1  110.29    5.70
 -11   3   1  101.59    5.20
 -11   3   1  103.69    5.20
  11   3  -1   89.29    6.30
  11   3  -1   96.99    7.70
  10  -3  -1   23.00    2.90
 -10   3   1   16.60    1.20
  10   3  -1   16.90    1.00
 -10   3   1   17.70    1.20
 -10   3   1   18.10    1.60
  -9  -3   1  148.89    7.60
   9  -3  -1  145.99    9.40
   9  -3  -1  150.18    8.30
  -9  -3   1  146.69    8.20
   9   3  -1  165.88    9.40
   9   3  -1  159.58    8.20
  -9   3   1  136.09    7.40
  -9   3   1  136.29    7.70
   9   3  -1  137.19    7.20
  -8  -3   1  342.17   17.00
   8  -3  -1  329.87   17.90
   8  -3  -1  360.16   17.00
  -8  -3   1  288.97   16.40
  -8  -3   1  343.47   16.50
   8   3  -1  321.37   17.70
   8   3  -1  325.27   16.30
  -8   3   1  346.17   16.50
   8   3  -1  341.57   16.30
  -8   3   1  303.37   16.30
   8   3  -1  330.37   16.90
   7  -3  -1  151.88    8.20
  -7  -3   1  132.79    7.70
  -7  -3   1  159.78    7.80
   7  -3  -1  152.28    9.10
  -7  -3   1  156.18    8.30
   7   3  -1  144.99    8.90
   7   3  -1  158.28    8.10
   7   3  -1  153.98    7.60
  -7   3   1  155.48    7.70
   6  -3  -1  249.97   12.60
  -6  -3   1  244.38   13.20
  -6  -3   1  217.98   12.20
  -6  -3   1  258.97   12.30
   6  -3  -1  246.48   13.30
   6   3  -1  264.37   12.40
   6   3  -1  241.48   13.20
  -6   3   1  247.08   12.20
  -6   3   1  249.48   12.30
   6   3  -1  238.78   12.10
   6   3  -1  239.08   12.50
  -5  -3   1   45.60    2.40
  -5  -3   1   37.70    3.40
  -5  -3   1   36.40    2.40
  -5  -3   1   46.20    2.80
   5   3  -1   42.70    2.70
   5   3  -1   41.30    3.30
   5   3  -1   42.00    2.30
  -5   3   1   47.00    2.50
  -5   3   1   47.20    3.30
   5   3  -1   47.20    2.60
  -4  -3   1 1672.43   82.69
  -4  -3   1 1761.62   82.99
  -4  -3   1 1710.03   83.39
   4  -3  -1 1656.73   83.29
  -4   3   1 1618.14   83.19
   4   3  -1 1769.62   83.19
  -3  -3   1   33.20    1.90
  -3  -3   1   32.30    2.40
  -3  -3   1   34.70    2.20
   3  -3  -1   33.60    2.50
   3   3  -1   33.50    2.30
  -3   3   1   31.10    2.30
   3   3  -1   32.10    1.90
   3   3  -1   37.40    2.10
   2  -3  -1  361.86   17.90
  -2  -3   1  335.67   17.70
  -2  -3   1  359.46   17.80
   2   3  -1  363.56   17.70
  -2   3   1  344.97   17.80
   2   3  -1  359.46   17.70
   2   3  -1  366.26   17.60
  -1  -3   1  134.39    6.90
   1   3  -1  135.99    6.80
  -1   3   1  127.29    6.90
   0  -3   1    5.50    0.70
   0   3   1    5.20    0.60
   0   3  -1    5.30    0.70
  -1  -3  -1   18.00    1.10
  -1  -3  -1   13.30    1.20
  -1   3  -1   11.90    1.10
   1   3   1   14.20    1.10
   1   3   1   16.20    1.40
  -2  -3  -1   52.99    3.30
  -2  -3  -1   52.29    3.10
   2  -3   1   57.19    3.10
  -2  -3  -1   54.19    2.90
  -2   3  -1   53.69    3.10
   2   3   1   53.59    3.30
   2   3   1   52.69    3.00
   3  -3   1   19.70    1.80
  -3  -3  -1   20.40    1.30
  -3  -3  -1   22.80    1.70
  -3   3  -1   19.50    1.70
   3   3   1   22.30    1.30
   3   3   1   23.90    1.50
  -4  -3  -1 1776.02   91.89
  -4  -3  -1 1900.41   92.19
   4  -3   1 1893.31   92.49
   4   3   1 1971.60   92.69
   4   3   1 1902.61   92.09
  -5   3  -1    7.60    0.80
  -6  -3  -1  139.69    6.90
   6  -3   1  132.59    8.00
   6  -3   1  132.79    6.80
   6  -3   1  139.99    7.30
  -6  -3  -1  139.69    7.40
   6   3   1  144.89    7.10
   6   3   1  128.79    6.70
   6   3   1  131.29    6.90
   6   3   1  134.89    7.30
  -6   3  -1  133.99    6.90
  -6   3  -1  140.89    6.90
   6   3   1  127.49    9.70
  -7  -3  -1    4.10    1.00
   7  -3   1    1.20    1.50
  -7  -3  -1    5.00    0.90
   7  -3   1    3.20    0.50
  -7  -3  -1    3.60    0.60
   7  -3   1    2.50    1.00
  -7   3  -1    4.30    0.60
   7   3   1    4.70    0.60
  -7   3  -1    4.30    0.50
   7   3   1    4.40    0.60
   7   3   1    3.90    1.00
   7   3   1    4.30    1.50
   7   3   1    3.60    0.40
  -8  -3  -1  523.55   25.10
  -8  -3  -1  509.55   24.50
   8  -3   1  500.55   25.90
  -8  -3  -1  447.46   24.50
   8  -3   1  517.65   24.80
   8  -3   1  504.95   25.00
   8   3   1  509.45   25.00
   8   3   1  491.65   25.90
  -8   3  -1  508.35   24.50
   8   3   1  477.75   24.20
   8   3   1  487.85   24.40
  -8   3  -1  478.55   24.40
 -10  -3  -1  382.96   18.30
  10  -3   1  358.06   18.90
  10  -3   1  326.57   18.00
 -10  -3  -1  386.46   18.90
  10  -3   1  343.87   20.00
 -10   3  -1  380.96   18.30
  10   3   1  358.26   18.10
 -10   3  -1  382.36   18.00
  10   3   1  366.06   20.10
  10   3   1  370.66   17.90
  10   3   1  363.66   18.90
  11  -3   1    0.90    1.50
  11  -3   1   -1.40    2.20
 -11  -3  -1    5.00    1.20
  11  -3   1    2.20    0.60
 -11   3  -1    3.50    0.90
  11   3   1    2.90    0.60
 -11   3  -1    3.50    0.60
  11   3   1    2.50    1.50
  11   3   1    3.10    2.30
  11   3   1    3.90    0.50
 -12  -3  -1   61.79    3.80
 -12  -3  -1   60.39    4.50
  12  -3   1   59.89    3.60
  12  -3   1   64.09    5.00
  12   3   1   65.89    3.30
  12   3   1   69.19    7.10
 -12   3  -1   62.39    3.40
 -12   3  -1   62.79    3.80
  12   3   1   65.19    5.00
  12   3   1   66.69    3.50
 -13  -3  -1   93.59    6.60
  13  -3   1  104.39    7.00
 -13  -3  -1   91.59    5.70
  13   3   1  101.69    5.40
 -13   3  -1  100.89    5.30
  13   3   1  110.49    6.90
  13   3   1  115.89    8.90
 -13   3  -1   97.59    5.80
  13   3   1  100.69    5.20
  14  -3   1  233.58   13.70
 -14  -3  -1  235.28   12.60
  14  -3   1  240.68   16.00
 -14  -3  -1  241.98   13.60
  14   3   1  257.17   13.60
 -14   3  -1  241.48   12.30
 -14   3  -1  242.48   12.80
  14   3   1  272.27   15.80
  14   3   1  237.98   12.10
  15  -3   1   71.09    8.80
 -15  -3  -1   75.79    4.60
 -15  -3  -1   79.19    5.60
 -15   3  -1   78.19    4.60
  15   3   1   72.49    8.10
 -15   3  -1   82.39    4.80
  15   3   1   67.39    5.90
 -16  -3  -1   51.99    4.70
  16  -3   1   48.90    5.30
 -16  -3  -1   48.60    3.70
  16  -3   1   52.39    8.20
 -16   3  -1   60.29    4.00
  16   3   1   44.30    5.20
 -16   3  -1   60.49    3.30
  16   3   1   47.60    7.80
  17  -3   1    9.90    5.00
 -17  -3  -1   12.40    3.10
 -17   3  -1   15.10    2.30
 -17   3  -1   11.50    1.50
  17   3   1   16.80    4.90
  18  -3   1    7.90    4.30
  18   3   1   15.90    4.80
 -17  -4   1    9.20    2.80
 -17  -4   1    6.60    1.60
  17  -4  -1    7.00    2.60
 -17   4   1    9.60    1.40
  17   4  -1   11.10    4.40
  17   4  -1    5.50    2.70
 -17   4   1   13.60    2.20
 -16  -4   1   58.29    5.50
  16  -4  -1   59.39    5.70
  16  -4  -1   63.19    9.10
 -16  -4   1   62.99    4.30
  16   4  -1   49.60    9.20
  16   4  -1   52.29    5.70
 -16   4   1   67.29    3.60
 -15  -4   1  158.08    9.00
 -15  -4   1  162.28   10.20
  15  -4  -1  173.38   12.80
  15  -4  -1  171.08   11.00
 -15   4   1  172.08    8.50
 -15   4   1  169.48    9.10
  15   4  -1  157.68   10.00
  15   4  -1  153.78   12.10
 -14  -4   1   47.70    4.60
 -14  -4   1   46.80    3.60
  14   4  -1   56.59    4.90
  14   4  -1   63.59    7.10
 -14   4   1   47.70    3.50
 -14   4   1   45.30    2.90
  13  -4  -1   31.40    6.10
 -13  -4   1   26.80    2.50
 -13  -4   1   26.90    3.30
  13   4  -1   34.70    3.90
  12  -4  -1   70.69    5.50
 -12  -4   1   76.49    5.30
  12  -4  -1   79.29    7.50
 -12  -4   1   72.99    4.40
  12   4  -1   64.19    5.30
 -12   4   1   78.49    4.00
 -12   4   1   76.49    4.40
  12   4  -1   68.29    7.00
 -11  -4   1  161.28    9.30
  11  -4  -1  159.68    9.30
  11  -4  -1  163.18   11.00
 -11  -4   1  165.28    8.50
  11   4  -1  150.08    9.10
  11   4  -1  152.68   10.50
 -11   4   1  166.58    8.50
 -11   4   1  163.98    8.10
 -10  -4   1   11.30    2.10
 -10  -4   1    6.60    1.10
  10   4  -1    6.00    2.30
  10   4  -1    6.70    0.80
  10   4  -1    5.50    0.60
 -10   4   1    6.40    1.10
   9  -4  -1  244.28   12.10
   9  -4  -1  240.28   13.40
  -9  -4   1  224.08   11.50
  -9  -4   1  222.08   12.20
  -9   4   1  215.78   11.20
  -9   4   1  234.68   11.50
   9   4  -1  227.58   11.20
   9   4  -1  220.88   11.90
   9   4  -1  217.88   11.10
   9   4  -1  204.38   12.80
  -8  -4   1   14.70    1.30
   8  -4  -1   15.70    2.40
  -8  -4   1   15.10    1.90
  -8  -4   1   12.20    1.20
   8  -4  -1   17.70    3.50
  -8   4   1   15.60    1.30
   8   4  -1   13.20    0.90
   8   4  -1   14.30    1.00
   8   4  -1   12.60    2.50
  -8   4   1   12.40    1.00
   7  -4  -1  259.27   12.50
  -7  -4   1  244.98   12.10
  -7  -4   1  213.48   12.10
  -7  -4   1  242.78   12.60
   7  -4  -1  266.07   13.50
   7   4  -1  223.88   11.70
  -7   4   1  232.28   11.90
   7   4  -1  235.48   13.10
   7   4  -1  240.48   12.30
  -7   4   1  243.18   12.10
   7   4  -1  230.48   11.90
   6  -4  -1  136.09    7.50
  -6  -4   1  147.79    7.70
  -6  -4   1  147.39    7.10
   6  -4  -1  132.19    8.30
   6   4  -1  131.09    7.00
   6   4  -1  147.49    8.20
  -6   4   1  138.39    7.30
   6   4  -1  139.99    7.40
   6   4  -1  122.29    6.80
   5  -4  -1  807.52   39.10
  -5  -4   1  845.42   38.90
   5  -4  -1  792.42   39.70
  -5  -4   1  729.83   38.90
  -5  -4   1  743.83   39.70
   5   4  -1  793.22   39.00
   5   4  -1  767.32   38.80
   5   4  -1  800.12   39.60
   5   4  -1  861.11   39.10
  -4  -4   1  540.35   28.00
  -4  -4   1  574.24   27.80
  -4  -4   1  515.05   27.40
   4  -4  -1  563.84   27.50
  -4  -4   1  577.54   27.40
   4  -4  -1  561.84   28.10
  -4   4   1  507.55   27.80
   4   4  -1  604.64   27.60
   4   4  -1  548.75   27.30
   4   4  -1  571.44   27.90
  -3  -4   1   86.99    4.40
   3  -4  -1   86.49    4.70
  -3  -4   1   78.79    4.80
   3  -4  -1   82.89    5.00
  -3  -4   1   85.29    4.80
  -3   4   1   73.19    4.70
   3   4  -1   90.29    4.60
   3   4  -1   84.49    4.40
   3   4  -1   84.89    4.80
  -2  -4   1  162.88    8.40
  -2  -4   1  165.38    8.80
  -2   4   1  162.58    8.70
   2   4  -1  170.78    8.50
   2   4  -1  175.38    8.90
  -1  -4   1  424.66   21.10
   1   4  -1  418.96   21.00
   0  -4   1   47.20    2.90
   0   4   1   45.80    2.90
   0   4  -1   50.09    2.90
   0   4   1   44.00    2.80
  -1   4  -1 2233.88  114.19
   1   4   1 2450.85  114.29
  -2  -4  -1   51.39    3.10
   2  -4   1   57.79    3.20
  -2  -4  -1   49.50    3.20
  -2  -4  -1   51.59    3.00
  -2  -4  -1   52.29    3.40
   2   4   1   50.29    3.30
  -2   4  -1   53.19    3.10
   2   4   1   53.19    2.90
   2   4   1   50.89    3.10
  -3  -4  -1  287.37   15.10
  -3  -4  -1  291.27   14.90
  -3  -4  -1  297.97   14.60
   3  -4   1  294.47   14.90
  -3  -4  -1  300.97   14.50
   3   4   1  309.47   14.50
  -3   4  -1  293.57   14.90
   3   4   1  291.17   15.10
   3   4   1  264.37   14.30
   4  -4   1    0.90    0.60
   4  -4   1    1.40    1.00
   4   4   1    1.00    0.20
  -4   4  -1    0.90    0.90
   4   4   1    1.50    0.40
  -5  -4  -1  275.97   13.10
  -5  -4  -1  250.57   13.10
  -5  -4  -1  271.87   13.50
  -5  -4  -1  243.18   14.00
   5  -4   1  253.27   13.80
   5   4   1  255.77   12.80
   5   4   1  293.47   13.30
   5   4   1  259.77   13.30
   5   4   1  270.77   13.00
  -5   4  -1  242.28   13.80
   5   4   1  254.17   14.00
  -6  -4  -1  182.78   10.20
   6  -4   1  175.88   10.10
   6  -4   1  195.98   11.20
  -6  -4  -1  218.68   10.20
   6  -4   1  201.88   10.40
   6   4   1  222.78   11.70
  -6   4  -1  189.78   10.10
   6   4   1  191.88    9.90
   6   4   1  197.58   10.10
   6   4   1  219.08   10.40
  -6   4  -1  199.08   10.10
   6   4   1  218.18   10.50
   7  -4   1   31.90    3.80
   7  -4   1   37.40    3.00
  -7  -4  -1   45.40    2.50
   7  -4   1   38.50    2.40
  -7  -4  -1   39.40    2.50
  -7  -4  -1   41.50    3.00
  -7   4  -1   41.80    2.40
   7   4   1   41.50    3.90
   7   4   1   42.20    2.40
  -7   4  -1   43.40    2.50
   7   4   1   42.30    2.20
   7   4   1   45.00    3.00
   8  -4   1  180.28   10.80
  -8  -4  -1  178.38    9.60
   8  -4   1  162.18    9.20
  -8  -4  -1  185.68    9.40
  -8  -4  -1  193.58   10.10
   8  -4   1  188.28    9.90
   8   4   1  194.38    9.90
   8   4   1  192.38   10.90
   8   4   1  173.68    9.00
   9  -4   1  502.65   27.00
  -9  -4  -1  537.85   26.20
  -9  -4  -1  531.05   25.50
   9  -4   1  467.05   25.20
   9  -4   1  518.75   26.00
   9   4   1  497.05   26.90
  -9   4  -1  532.75   25.40
   9   4   1  511.65   25.10
   9   4   1  516.55   25.90
   9   4   1  524.75   25.30
  10  -4   1   80.49    6.70
 -10  -4  -1   76.69    4.40
  10  -4   1   90.69    5.50
 -10  -4  -1   75.89    5.10
  10   4   1   77.99    5.10
  10   4   1   75.59    4.00
  10   4   1   76.59    6.40
  10   4   1   75.99    4.20
 -10   4  -1   79.99    4.40
 -11  -4  -1    5.20    1.60
 -11  -4  -1    6.50    1.30
  11  -4   1    1.00    2.60
  11   4   1    2.50    1.60
 -11   4  -1    3.30    0.50
 -11   4  -1    3.40    0.80
  11   4   1    0.60    2.50
  11   4   1    3.90    0.70
  11   4   1    4.30    0.60
  12  -4   1   31.30    3.90
 -12  -4  -1   33.70    3.30
 -12  -4  -1   33.40    2.50
  12  -4   1   32.60    6.10
 -12   4  -1   32.80    2.00
  12   4   1   25.00    5.20
  12   4   1   32.60    2.10
  12   4   1   34.00    1.80
 -12   4  -1   33.20    2.40
 -13  -4  -1   62.69    3.90
 -13  -4  -1   67.29    4.90
  13  -4   1   58.89    5.10
  13   4   1   52.59    3.30
  13   4   1   55.09    3.10
 -14   4  -1   21.10    2.10
 -14   4  -1   19.10    1.50
  14   4   1   17.00    1.30
 -15  -4  -1   22.30    3.30
  15  -4   1   14.50    4.80
  15  -4   1   13.20    4.90
 -15  -4  -1   18.20    2.20
 -15   4  -1   20.80    1.50
  15   4   1   16.50    4.30
  15   4   1   20.30    1.30
 -15   4  -1   20.70    2.10
  15   4   1   13.60    3.50
  16  -4   1    2.90    4.00
 -16  -4  -1    0.60    2.40
 -16  -4  -1   -0.30    1.10
  16  -4   1    1.80    2.10
 -16   4  -1    1.40    1.10
 -16   4  -1    1.20    0.60
  16   4   1   -3.70    3.40
  16   4   1   -2.40    2.10
 -17  -4  -1   80.19    6.80
 -17  -4  -1   73.39    5.30
  17  -4   1   80.39    6.90
 -17   4  -1   92.59    5.40
  17   4   1   87.69    6.90
 -17   4  -1   86.99    4.80
  17   4   1   93.99    9.10
 -17  -5   1    7.20    1.70
  17  -5  -1    9.40    6.20
 -17  -5   1    9.10    2.70
  17  -5  -1    6.20    2.60
  17   5  -1   11.30    4.20
  17   5  -1    7.30    2.70
 -17   5   1    8.80    1.30
 -17   5   1    6.90    1.60
 -16  -5   1    8.70    2.80
  16  -5  -1    9.10    2.80
  16  -5  -1   14.20    4.90
 -16  -5   1    9.30    1.90
  16   5  -1   10.70    4.20
  16   5  -1    8.40    2.80
 -16   5   1    9.80    1.30
 -16   5   1   13.60    1.90
  15  -5  -1    6.50    2.50
  15  -5  -1   16.60    4.70
 -15  -5   1   10.80    2.80
 -15  -5   1   13.90    2.30
 -15   5   1   10.40    1.30
 -15   5   1   12.50    1.70
  15   5  -1   11.20    4.00
 -14  -5   1   49.99    3.80
  14  -5  -1   60.69    5.30
  14   5  -1   62.59    5.00
 -14   5   1   48.00    3.00
 -14   5   1   49.60    3.60
 -13  -5   1   97.69    5.90
  13  -5  -1  104.79    7.10
 -13  -5   1   99.49    7.00
  13  -5  -1  122.09    9.60
 -13   5   1   99.29    5.80
  13   5  -1   99.89    6.80
  13   5  -1  109.39    8.70
 -13   5   1   96.99    5.30
  12  -5  -1   99.99    6.60
 -12  -5   1   99.29    6.60
 -12  -5   1   94.09    5.60
  12  -5  -1  103.59    8.70
 -12   5   1   97.19    5.50
  12   5  -1   99.59    4.90
 -12   5   1  101.09    5.10
  12   5  -1   84.19    6.30
  12   5  -1   88.19    7.90
 -11  -5   1   19.70    2.00
 -11  -5   1   21.10    2.90
  11   5  -1   21.20    3.20
 -11   5   1   18.40    1.70
  11   5  -1   16.90    1.40
  11   5  -1   16.10    1.10
 -10  -5   1  371.26   18.10
 -10  -5   1  366.56   19.00
  10  -5  -1  350.46   18.60
  10  -5  -1  348.77   20.00
 -10   5   1  364.86   18.00
  10   5  -1  356.96   19.60
  10   5  -1  356.56   17.50
  10   5  -1  347.27   17.70
   9  -5  -1   67.49    6.00
  -9  -5   1   58.89    4.10
   9   5  -1   70.69    3.40
  -9   5   1   66.49    3.80
  -8  -5   1  134.79    7.70
  -8  -5   1  109.89    6.80
  -8  -5   1  140.09    7.00
   8  -5  -1  123.09    7.40
   8  -5  -1  122.59    8.50
   8   5  -1  130.69    7.20
   8   5  -1  135.39    6.70
   8   5  -1  138.49    6.70
   8   5  -1  126.89    8.20
  -8   5   1  134.89    6.90
   7  -5  -1  213.78   13.30
  -7  -5   1  209.58   11.90
  -7  -5   1  250.17   12.70
   7  -5  -1  233.48   12.30
  -7  -5   1  247.88   12.00
   7   5  -1  253.97   12.20
   7   5  -1  235.38   13.00
   7   5  -1  229.38   11.60
   7   5  -1  238.48   11.80
  -7   5   1  239.38   12.00
  -6  -5   1   68.19    3.50
  -6  -5   1   64.49    4.10
  -6  -5   1   54.29    3.40
   6  -5  -1   53.49    3.90
   6   5  -1   60.69    3.70
   6   5  -1   56.89    3.10
   6   5  -1   59.69    4.90
   6   5  -1   59.39    3.30
  -5  -5   1  521.75   29.10
   5  -5  -1  586.44   28.50
  -5  -5   1  598.64   29.00
  -5  -5   1  602.04   28.40
   5   5  -1  566.64   28.30
   5   5  -1  567.14   29.00
   5   5  -1  581.14   28.40
  -4  -5   1  133.19    7.50
  -4  -5   1  136.89    7.00
  -4  -5   1  129.59    7.60
   4   5  -1  139.19    7.50
  -4   5   1  135.49    7.50
   4   5  -1  132.29    7.00
  -3  -5   1  246.58   14.60
   3  -5  -1  277.17   14.80
  -3  -5   1  303.27   14.80
   3  -5  -1  282.67   14.30
   3   5  -1  288.57   14.50
   3   5  -1  297.97   14.50
   3   5  -1  295.97   14.30
   2  -5  -1   25.80    1.50
  -2  -5   1   22.30    2.00
  -2  -5   1   23.80    1.70
   2   5  -1   27.30    1.80
   2   5  -1   23.20    1.80
  -2   5   1   24.00    2.00
  -1  -5   1  778.62   37.70
  -1  -5   1  765.72   38.10
   1   5  -1  743.53   38.00
  -1   5   1  791.02   37.90
   0  -5  -1  446.46   21.50
   0  -5   1  452.35   22.00
   0  -5   1  426.26   21.50
   0   5   1  433.96   21.90
   0   5   1  434.16   21.70
   0   5  -1  427.36   21.80
  -1  -5  -1  110.29    5.70
   1  -5   1  105.59    5.70
   1   5   1  110.99    5.90
   1   5   1  108.89    6.10
  -1   5  -1  117.39    6.30
  -2  -5  -1  501.95   26.30
  -2  -5  -1  544.75   26.20
  -2  -5  -1  559.34   26.70
   2  -5   1  494.05   26.10
  -2   5  -1  485.35   26.40
   2   5   1  581.54   26.40
   2   5   1  566.04   26.60
  -3  -5  -1  246.38   12.10
  -3  -5  -1  223.78   12.20
  -3  -5  -1  243.18   11.60
   3  -5   1  242.18   11.50
   3  -5   1  232.68   12.00
  -3  -5  -1  217.88   11.70
   3   5   1  237.78   11.60
   3   5   1  217.68   11.80
   3   5   1  224.98   12.10
  -3   5  -1  215.08   11.90
  -4  -5  -1    6.80    1.10
  -4  -5  -1    8.10    1.80
  -4  -5  -1   10.80    1.60
   4  -5   1   14.30    2.20
   4   5   1    9.70    0.70
   4   5   1   10.70    1.20
   4   5   1   12.60    2.30
   4   5   1    9.60    1.00
  -4   5  -1   11.70    1.80
  -5  -5  -1  205.68   12.00
  -5  -5  -1  229.98   11.00
  -5  -5  -1  203.18   11.10
  -5  -5  -1  226.08   11.60
   5   5   1  220.78   10.90
   5   5   1  216.18   11.90
  -6  -5  -1   90.19    4.80
   6  -5   1   81.39    6.00
  -6  -5  -1   90.89    5.10
   6  -5   1   89.79    5.10
  -6  -5  -1   87.29    5.40
   6   5   1   88.79    4.50
   6   5   1   87.29    5.10
   6   5   1   86.69    5.90
   7  -5   1  136.69    9.00
   7  -5   1  147.09    8.10
  -7  -5  -1  150.48    8.40
  -7  -5  -1  146.69    7.70
   7   5   1  143.59    7.30
  -7   5  -1  144.69    7.80
   7   5   1  151.78    8.10
   7   5   1  150.48    7.50
   7   5   1  151.88    9.10
   8  -5   1   57.99    4.00
   8  -5   1   49.90    5.00
  -8   5  -1   52.59    3.10
   8   5   1   52.19    3.00
   8   5   1   51.69    2.80
   9  -5   1   17.90    2.70
  -9  -5  -1   17.60    1.80
  -9  -5  -1   14.00    2.40
   9  -5   1   20.50    4.10
   9   5   1   17.10    3.70
   9   5   1   17.30    1.40
  -9   5  -1   15.60    1.40
   9   5   1   16.40    1.10
   9   5   1   17.60    2.50
 -10  -5  -1    8.00    2.00
  10  -5   1    6.90    3.10
 -10  -5  -1    9.60    1.50
  10  -5   1    7.70    2.00
  10   5   1   10.00    1.90
  10   5   1   10.50    0.80
 -10   5  -1   10.50    1.20
  10   5   1    9.80    2.80
  10   5   1   11.10    1.10
  11  -5   1    0.70    1.80
 -11  -5  -1    1.30    0.90
 -11  -5  -1    1.50    1.50
  11  -5   1   -1.20    2.70
  11   5   1    0.00    1.50
 -11   5  -1    1.80    0.70
  11   5   1   -1.00    2.40
  11   5   1    0.90    0.40
  11   5   1    0.90    0.60
 -12  -5  -1    8.60    1.70
  12  -5   1    0.10    3.40
 -12  -5  -1    7.10    1.90
  12   5   1    7.00    0.70
  12   5   1    5.20    1.90
 -12   5  -1    5.20    0.80
  12   5   1    7.00    1.00
  12   5   1    7.30    4.70
 -12   5  -1    6.00    1.10
 -13  -5  -1  292.07   16.80
  13  -5   1  305.37   18.80
 -13  -5  -1  295.87   15.80
  13  -5   1  298.47   16.70
  13   5   1  327.07   15.40
 -13   5  -1  311.47   15.30
  13   5   1  309.37   18.30
  13   5   1  321.47   15.20
 -13   5  -1  316.87   15.70
  13   5   1  298.97   16.50
 -14  -5  -1   33.70    3.00
 -14  -5  -1   35.50    4.20
  14   5   1   32.70    1.90
  14   5   1   31.80    2.20
 -14   5  -1   30.40    2.50
  14   5   1   40.00    4.20
 -15  -5  -1    4.80    1.30
  15  -5   1    0.30    2.20
  15  -5   1    1.50    3.80
  15   5   1    4.20    0.70
 -15   5  -1    6.20    1.30
  15   5   1    1.80    2.50
  15   5   1    2.70    3.50
 -16  -5  -1   46.70    4.70
 -16  -5  -1   43.40    3.40
  16  -5   1   30.90    6.40
  16   5   1   35.50    4.70
  16   5   1   36.20    7.00
 -16   5  -1   36.90    2.40
 -16   5  -1   37.70    3.00
 -17  -5  -1   17.30    3.80
 -17  -5  -1   20.10    2.70
  17  -5   1   17.80    7.00
  17  -5   1   21.10    4.40
 -17   5  -1   20.70    2.30
  17   5   1   18.80    5.20
 -17   5  -1   18.70    1.60
  17   5   1   23.40    4.30
 -17  -6   1   33.00    3.80
  17  -6  -1   40.60    5.30
  17  -6  -1   42.20    8.00
 -17  -6   1   43.80    5.20
  17   6  -1   41.30    7.00
 -17   6   1   43.90    3.20
 -17   6   1   39.40    2.50
  17   6  -1   32.90    4.80
 -16  -6   1   58.69    4.60
 -16  -6   1   61.39    6.10
  16  -6  -1   64.49    9.20
  16  -6  -1   63.39    6.10
 -16   6   1   63.49    3.60
  16   6  -1   60.59    7.70
  16   6  -1   58.09    5.60
 -16   6   1   66.49    4.20
 -15  -6   1    0.20    2.50
  15  -6  -1    5.10    2.40
  15  -6  -1    8.20    4.60
 -15  -6   1    2.20    1.50
 -15   6   1    2.90    0.70
  15   6  -1    9.00    3.90
  15   6  -1    5.50    2.50
 -14  -6   1  351.96   18.20
  14  -6  -1  337.77   19.10
  14  -6  -1  319.47   21.40
 -14  -6   1  342.27   19.50
 -14   6   1  351.96   18.00
  14   6  -1  383.46   17.30
  14   6  -1  354.86   18.80
  14   6  -1  369.26   20.90
 -14   6   1  359.06   17.50
 -13  -6   1   47.50    5.60
  13  -6  -1   63.29    5.30
 -13  -6   1   54.09    4.00
  13  -6  -1   74.29    7.80
  13   6  -1   61.19    6.80
 -13   6   1   51.89    3.10
  13   6  -1   57.69    4.80
 -13   6   1   53.99    3.60
  13   6  -1   55.19    2.90
  12  -6  -1   37.70    4.30
  12  -6  -1   39.90    6.30
 -12  -6   1   42.20    4.40
 -12  -6   1   43.70    3.30
  12   6  -1   48.50    2.60
 -12   6   1   45.30    3.00
  12   6  -1   39.50    5.60
  12   6  -1   45.50    2.40
  12   6  -1   41.50    4.10
  11  -6  -1   40.40    5.70
 -11  -6   1   32.80    2.90
  11  -6  -1   35.50    3.90
 -11  -6   1   32.90    3.80
  11   6  -1   35.40    1.90
  11   6  -1   37.60    2.20
  11   6  -1   28.20    4.60
 -11   6   1   36.20    2.50
  11   6  -1   27.70    3.70
 -10  -6   1   14.30    2.00
 -10  -6   1   15.20    2.90
  10   6  -1   17.60    3.60
  10   6  -1   12.70    3.00
  10   6  -1   15.20    1.10
  10   6  -1   15.70    1.30
 -10   6   1   13.30    1.50
  -9  -6   1   82.99    4.90
   9  -6  -1   94.49    7.10
  -9  -6   1   81.79    5.80
   9  -6  -1   83.79    5.80
   9   6  -1   81.69    4.50
   9   6  -1   80.09    4.30
  -9   6   1   85.99    4.80
   9   6  -1   82.99    6.50
   9   6  -1   85.79    5.30
  -8  -6   1  179.78    9.20
  -8  -6   1  180.08   10.00
   8  -6  -1  157.58   10.80
   8  -6  -1  160.48    9.60
   8   6  -1  186.48    9.40
   8   6  -1  171.98    8.90
   8   6  -1  169.28    8.70
   8   6  -1  194.98   10.50
  -8   6   1  170.48    9.10
   7  -6  -1   25.90    3.70
   7  -6  -1   23.20    2.70
  -6  -6   1 1146.09   54.49
  -6  -6   1 1144.89   55.29
   6  -6  -1 1119.69   54.69
   6  -6  -1 1111.99   55.69
   6   6  -1 1133.69   54.49
   6   6  -1 1013.00   54.09
   6   6  -1 1151.58   55.79
   6   6  -1 1074.49   54.39
   5  -6  -1    4.40    2.20
  -5  -6   1    9.70    1.90
  -5  -6   1    6.80    1.90
   5  -6  -1    7.70    1.40
   5   6  -1    8.90    1.80
  -4  -6   1   10.10    2.10
   4  -6  -1    9.40    2.20
  -4  -6   1    8.50    1.70
  -4  -6   1   11.20    1.30
   4   6  -1   13.20    1.50
  -4   6   1    7.90    1.50
  -3  -6   1   19.90    2.20
   3  -6  -1   13.10    1.50
  -3   6   1   14.90    1.80
  -2  -6   1  520.35   26.80
  -2  -6   1  511.45   26.30
   2  -6  -1  553.54   26.20
  -2   6   1  537.05   26.60
   2   6  -1  541.25   26.50
  -1  -6   1  133.79    7.20
   1  -6  -1  138.39    7.10
   1   6  -1  143.39    7.40
   1   6  -1  148.29    7.80
  -1   6   1  132.39    7.50
   0  -6  -1  168.58    8.70
   0   6  -1  164.18    9.10
   0   6   1  162.28    9.20
   0   6   1  192.48    9.50
   1  -6   1   41.00    3.10
  -1  -6  -1   42.90    2.60
  -1   6  -1   43.70    3.00
   1   6   1   45.90    3.00
   2  -6   1   30.70    2.40
  -2  -6  -1   32.90    2.60
  -2  -6  -1   30.70    2.00
  -2   6  -1   27.60    2.30
   2   6   1   31.30    2.60
   3  -6   1  254.27   11.90
  -3  -6  -1  218.68   11.60
  -3  -6  -1  212.48   12.20
   3  -6   1  244.78   12.30
   3   6   1  232.38   11.80
   3   6   1  221.08   12.20
  -3   6  -1  230.08   12.00
  -4  -6  -1  210.38   10.60
   4  -6   1  208.28   10.60
  -4  -6  -1  212.68   11.50
   4  -6   1  209.58   11.30
  -4  -6  -1  210.58   11.20
   4   6   1  204.38   10.60
   4   6   1  216.98   11.40
  -4   6  -1  187.98   11.00
   4   6   1  209.78   10.60
  -5  -6  -1  243.18   12.50
  -5  -6  -1  246.38   11.80
  -5  -6  -1  215.78   12.80
   5  -6   1  236.28   11.90
   5  -6   1  228.28   13.00
   5   6   1  221.68   12.10
   5   6   1  224.48   11.50
   5   6   1  237.18   11.80
   5   6   1  235.68   12.70
  -6  -6  -1    1.20    1.30
   6  -6   1    0.80    1.10
  -6  -6  -1    2.50    0.80
   6   6   1    0.80    0.40
   6   6   1    0.50    0.60
   6   6   1    2.20    1.70
   7  -6   1    5.90    2.40
  -7  -6  -1    6.90    1.40
   7  -6   1    7.00    1.50
  -7  -6  -1   10.40    2.00
   7   6   1    8.00    0.70
   7   6   1    7.90    0.90
   7   6   1    7.90    1.40
   7   6   1    7.00    2.10
  -8  -6  -1  197.48   10.40
   8  -6   1  165.58    9.80
  -8  -6  -1  197.18    9.60
   8  -6   1  155.88   10.90
   8   6   1  198.58    9.90
   8   6   1  181.88    9.30
   8   6   1  179.98    9.00
   8   6   1  193.08   11.00
  -8   6  -1  168.88    9.30
  -9  -6  -1   37.50    3.60
  -9  -6  -1   38.90    2.90
   9  -6   1   50.99    5.30
  -9   6  -1   45.00    2.60
   9   6   1   41.50    2.40
   9   6   1   30.90    4.50
   9   6   1   33.70    3.40
   9   6   1   39.70    2.20
 -10  -6  -1   13.20    1.80
  10  -6   1   14.60    3.50
 -10  -6  -1   14.20    2.50
  10  -6   1   12.50    2.20
  10   6   1   11.70    2.10
  10   6   1   14.50    1.30
  10   6   1   10.40    3.00
 -10   6  -1   13.40    1.40
  10   6   1   14.30    1.00
 -11  -6  -1    2.70    1.10
 -11  -6  -1    4.10    1.80
  11  -6   1   -1.00    2.70
  11   6   1    5.30    3.00
  11   6   1    0.90    0.70
  12  -6   1   -3.30    3.00
  12  -6   1   -0.60    1.90
 -12   6  -1    3.10    0.90
 -13  -6  -1   -0.50    2.10
 -13  -6  -1    2.10    1.40
  13  -6   1    9.00    3.90
  13   6   1    3.60    0.80
 -13   6  -1    4.40    1.00
  13   6   1    4.90    0.70
  13   6   1    8.20    3.30
  14  -6   1  160.48   10.60
 -14  -6  -1  177.08    9.70
  14  -6   1  159.38   13.00
 -14  -6  -1  164.98   11.60
 -14   6  -1  177.58    9.40
 -14   6  -1  176.18    8.90
  14   6   1  178.18   10.40
  14   6   1  194.38    9.10
  14   6   1  188.98    8.80
  14   6   1  170.98   12.70
  15  -6   1    2.90    4.20
 -15  -6  -1    1.70    1.30
  15  -6   1    1.40    2.20
 -15  -6  -1   -1.00    2.20
 -15   6  -1    2.00    0.90
  15   6   1    2.10    3.10
 -15   6  -1    1.60    0.50
 -16  -6  -1    0.90    1.40
  16  -6   1   -2.40    2.20
  16  -6   1   -3.20    3.90
 -16  -6  -1    0.10    2.30
 -16   6  -1    2.50    1.00
  16   6   1   -1.60    3.10
  16   6   1   -0.30    2.20
 -16   6  -1    1.20    0.50
 -17  -6  -1    0.20    1.50
  17  -6   1    1.50    2.30
  17  -6   1    2.80    4.30
 -17  -6  -1    4.60    2.90
  17   6   1    2.40    2.40
 -17   6  -1    3.40    0.70
  17   6   1    3.40    4.70
 -17  -7   1   16.60    2.80
  17  -7  -1   15.70    5.50
 -17  -7   1   18.00    4.10
 -17   7   1   18.00    1.50
 -17   7   1   19.70    2.10
  17   7  -1   14.20    3.30
  17   7  -1   15.80    5.10
  16  -7  -1   24.00    6.00
  16  -7  -1   28.50    4.90
 -16   7   1   27.80    2.00
 -16   7   1   31.70    2.60
 -15  -7   1    2.20    1.70
  15  -7  -1    5.80    2.60
 -15  -7   1    0.20    2.70
  15  -7  -1    8.30    4.70
 -15   7   1    2.40    1.10
  15   7  -1    4.10    3.00
 -15   7   1    1.80    0.60
  15   7  -1    6.60    3.70
  14  -7  -1   49.00    7.80
  14  -7  -1   44.50    4.90
 -14  -7   1   31.10    3.40
 -14  -7   1   28.90    4.70
  14   7  -1   34.40    2.00
 -14   7   1   33.70    2.70
  14   7  -1   44.70    6.40
 -14   7   1   33.90    2.20
 -13  -7   1   30.70    3.20
  13  -7  -1   42.90    4.60
 -13  -7   1   27.40    4.30
  13  -7  -1   44.60    7.20
  13   7  -1   35.20    5.80
  13   7  -1   33.70    2.00
  13   7  -1   37.00    2.30
  13   7  -1   32.50    3.90
 -13   7   1   32.80    2.60
 -12  -7   1    1.30    1.30
 -12  -7   1    0.60    2.00
  12   7  -1    2.10    0.80
  12   7  -1    2.10    0.40
  12   7  -1    0.10    1.70
  12   7  -1    0.60    2.70
 -12   7   1    2.90    1.00
 -11  -7   1   42.60    4.60
 -11  -7   1   47.60    3.60
  11  -7  -1   51.79    4.70
  11  -7  -1   43.20    9.70
  11   7  -1   49.20    4.30
  11   7  -1   50.69    2.90
  11   7  -1   45.50    6.10
  11   7  -1   50.29    2.60
 -11   7   1   47.10    3.20
 -10  -7   1  428.26   22.70
  10  -7  -1  421.46   23.70
 -10  -7   1  425.86   21.60
  10  -7  -1  423.66   22.10
  10   7  -1  432.46   22.00
  10   7  -1  430.76   23.10
  10   7  -1  425.46   20.90
 -10   7   1  416.16   21.40
  10   7  -1  436.76   21.20
  -9  -7   1  139.79    7.70
   9  -7  -1  142.49    9.70
   9  -7  -1  145.29    8.20
  -9  -7   1  134.99    8.70
   9   7  -1  139.49    7.00
   9   7  -1  144.29    7.30
  -9   7   1  141.59    7.50
   9   7  -1  134.59    7.90
   9   7  -1  134.79    9.00
  -8  -7   1   13.20    2.40
  -8  -7   1   11.70    1.80
   8  -7  -1    9.80    2.10
   8   7  -1   14.10    2.10
   8   7  -1   11.60    1.00
   8   7  -1   12.20    1.20
   8   7  -1   14.40    2.60
  -8   7   1   12.70    1.40
  -7  -7   1   94.79    5.10
  -7  -7   1   93.29    6.00
   7  -7  -1   76.39    5.50
   7   7  -1   92.99    5.20
   7   7  -1   86.69    6.10
   7   7  -1   86.39    4.50
   7   7  -1   88.39    4.90
  -6  -7   1   85.99    5.70
   6  -7  -1   78.79    6.60
  -6  -7   1   90.39    4.90
   6  -7  -1   84.29    5.30
   6   7  -1   85.29    4.90
   6   7  -1   89.19    4.70
   6   7  -1   78.79    4.40
  -5  -7   1  197.08   10.10
   5  -7  -1  195.28   10.20
  -5  -7   1  171.48   10.80
   5  -7  -1  192.68   11.30
  -5  -7   1  194.18   10.90
   5   7  -1  200.48   10.00
   5   7  -1  196.28   10.80
   5   7  -1  195.78   10.00
  -4  -7   1   88.69    5.90
  -4  -7   1   90.59    5.10
   4  -7  -1   91.79    5.30
   4   7  -1   93.79    5.20
  -4   7   1   92.09    6.00
   4   7  -1   93.99    5.00
  -3  -7   1   51.19    3.00
  -3  -7   1   54.89    3.80
   3  -7  -1   38.00    2.90
   3   7  -1   50.29    3.10
  -3   7   1   40.20    3.20
  -2  -7   1   58.99    3.40
   2  -7  -1   56.79    3.20
  -2  -7   1   59.59    4.10
   2  -7  -1   48.80    3.30
   2   7  -1   59.49    3.60
   1  -7  -1  389.46   19.60
  -1  -7   1  390.06   20.30
  -1  -7   1  395.16   19.70
   1   7  -1  411.66   20.00
  -1   7   1  377.06   20.00
  -1   7   1  410.86   20.00
   0  -7  -1    0.50    0.60
   0  -7   1    2.10    0.70
   0   7   1    1.40    1.00
   1  -7   1   16.00    1.50
   1   7   1   19.90    1.90
   2  -7   1   44.10    2.60
  -2  -7  -1   44.60    2.80
   3  -7   1  257.27   12.50
   3  -7   1  244.38   12.60
  -3  -7  -1  244.38   13.30
  -3  -7  -1  245.28   12.70
   3   7   1  243.68   13.20
   3   7   1  261.67   12.80
   4  -7   1   -0.40    0.70
  -4  -7  -1   -1.00    1.30
   4  -7   1   -0.50    1.30
  -4  -7  -1    0.10    0.70
  -4  -7  -1   -1.10    1.30
   4   7   1    1.00    0.90
  -4   7  -1    0.60    0.90
   4   7   1    1.50    0.70
   4   7   1    0.00    1.40
  -5  -7  -1    2.50    1.70
   5  -7   1    6.10    1.20
  -5  -7  -1    3.50    1.00
   5   7   1    4.70    0.90
   5   7   1    4.20    0.60
   5   7   1    1.00    1.90
   5   7   1    4.10    1.30
   6  -7   1  144.79    9.00
  -6  -7  -1  149.09    8.60
  -6  -7  -1  148.59    7.70
   6  -7   1  146.99    7.90
   6   7   1  139.79    8.70
   6   7   1  140.29    7.80
   6   7   1  145.19    7.60
   6   7   1  142.59    7.30
  -7  -7  -1    6.40    1.20
  -7  -7  -1    7.70    1.80
   7   7   1    5.00    0.90
   7   7   1    6.10    1.30
   7   7   1    6.80    2.10
   7   7   1    4.90    0.70
  -8  -7  -1   58.39    3.80
  -8  -7  -1   57.99    4.70
   8  -7   1   53.59    4.20
   8  -7   1   53.39    5.50
   8   7   1   62.59    3.40
   8   7   1   60.09    3.10
   8   7   1   57.69    5.40
   8   7   1   56.29    4.10
   9  -7   1   11.80    2.70
   9  -7   1   15.40    3.30
  -9  -7  -1   13.20    1.90
  -9  -7  -1   11.20    2.50
   9   7   1   13.60    2.60
   9   7   1   11.30    1.20
   9   7   1   11.40    0.90
   9   7   1   11.20    2.90
  -9   7  -1    9.40    1.30
 -10  -7  -1  110.09    6.30
  10  -7   1  107.49    8.60
  10  -7   1  107.09    6.90
 -10  -7  -1  116.49    7.50
  10   7   1   98.09    8.10
  10   7   1  112.49    5.60
  10   7   1  115.89    5.90
  10   7   1  103.49    6.80
 -10   7  -1  117.19    6.00
 -11  -7  -1    0.40    1.00
  11  -7   1   -1.40    1.70
  11  -7   1   -2.00    2.70
 -11  -7  -1   -0.50    1.80
 -11   7  -1    0.10    0.70
  11   7   1   -0.20    0.60
  11   7   1   -1.80    2.60
  11   7   1    0.10    0.40
  11   7   1   -1.50    1.50
  12  -7   1    4.40    3.60
 -12  -7  -1    7.00    1.60
 -12  -7  -1    7.20    2.40
  12  -7   1    5.40    2.20
  12   7   1    7.20    2.10
 -12   7  -1    8.60    1.30
  12   7   1    8.90    1.20
  12   7   1    8.10    0.80
  12   7   1    9.50    5.30
 -13  -7  -1   21.60    4.40
  13   7   1   27.40    1.60
  13   7   1   25.00    4.60
  13   7   1   22.70    3.80
 -13   7  -1   25.90    2.10
  13   7   1   28.30    2.00
 -14  -7  -1    0.90    2.70
  14  -7   1    3.30    4.20
 -14  -7  -1    4.00    1.60
  14  -7   1    5.60    2.40
 -14   7  -1    7.60    0.90
  14   7   1    8.30    1.20
  14   7   1    7.70    3.50
 -14   7  -1    9.00    1.40
  14   7   1    7.20    2.40
 -15  -7  -1   42.80    3.80
 -15  -7  -1   35.50    5.20
  15  -7   1   41.10    5.10
  15  -7   1   42.10    8.30
  15   7   1   43.90    7.10
 -15   7  -1   43.70    2.60
 -15   7  -1   47.60    3.10
  15   7   1   44.40    7.20
  16  -7   1    0.50    4.30
 -17  -7  -1    0.80    3.00
  17  -7   1    3.10    2.50
  17  -7   1    2.90    4.20
 -17  -7  -1    2.70    1.70
  17   7   1    2.00    2.50
 -16  -8   1   14.40    3.10
  16  -8  -1    9.50    5.90
 -16  -8   1   17.40    4.00
  16  -8  -1   22.20    4.70
  16   8  -1   17.90    4.50
  16   8  -1   17.30    4.10
 -16   8   1   17.00    1.50
 -16   8   1   15.50    2.10
 -15  -8   1  199.28   12.10
 -15  -8   1  221.68   13.80
  15  -8  -1  217.48   13.20
  15  -8  -1  191.38   15.90
 -15   8   1  225.48   11.60
  15   8  -1  229.08   14.60
 -15   8   1  215.68   11.00
  15   8  -1  239.38   10.80
 -14  -8   1   48.00    5.30
  14  -8  -1   59.79    8.40
 -14  -8   1   40.30    3.90
  14   8  -1   49.10    4.80
  14   8  -1   45.40    2.80
 -14   8   1   39.60    3.10
  14   8  -1   45.90    6.80
  14   8  -1   44.90    2.50
  13  -8  -1   89.79    6.90
  13  -8  -1   86.69    9.10
 -13  -8   1   82.39    7.10
 -13  -8   1   90.49    5.80
  13   8  -1   89.29    8.20
  13   8  -1   89.59    6.30
 -13   8   1   84.99    5.20
  13   8  -1   99.89    5.00
  13   8  -1   94.09    4.70
 -12  -8   1   -1.30    2.00
 -12   8   1    3.20    1.00
  12   8  -1    0.40    4.20
  11  -8  -1  130.09    8.20
 -11  -8   1  126.79    7.30
  11  -8  -1  123.09   11.30
 -11  -8   1  113.49    8.60
 -11   8   1  124.49    7.00
  11   8  -1  131.69    6.40
  11   8  -1  135.09    6.70
  11   8  -1  127.79    9.30
  11   8  -1  122.59    7.60
 -10  -8   1   12.90    3.10
 -10  -8   1   14.20    2.40
  10   8  -1   17.40    1.50
  10   8  -1   15.30    1.20
  10   8  -1   16.00    3.00
 -10   8   1   13.90    1.70
  10   8  -1   14.00    3.30
   9  -8  -1  226.28   13.80
  -9  -8   1  209.18   12.90
  -9  -8   1  217.68   11.80
   9  -8  -1  229.18   12.30
   9   8  -1  225.38   11.90
   9   8  -1  229.78   11.40
  -9   8   1  226.78   11.60
   9   8  -1  221.48   13.00
   9   8  -1  221.18   11.10
  -8  -8   1   18.10    3.00
   8  -8  -1   17.50    3.80
   8  -8  -1   19.70    3.00
  -8  -8   1   17.70    2.20
   8   8  -1   20.50    1.70
   8   8  -1   20.20    3.10
   8   8  -1   19.70    1.30
   8   8  -1   18.90    2.40
   7  -8  -1  169.08    9.40
   7  -8  -1  168.48   10.90
  -7  -8   1  170.98    9.40
  -7  -8   1  171.08   10.20
   7   8  -1  161.98    8.50
   7   8  -1  177.88    9.10
   7   8  -1  173.48    8.90
   7   8  -1  169.48   10.00
  -6  -8   1  113.39    7.30
  -6  -8   1  116.99    6.30
   6  -8  -1  107.99    6.50
   6  -8  -1  114.29    8.10
   6   8  -1  111.09    6.20
   6   8  -1   95.49    6.00
   5  -8  -1  850.41   41.20
  -5  -8   1  841.82   42.00
  -5  -8   1  833.72   41.10
   5   8  -1  831.32   40.90
   5   8  -1  792.82   41.50
   5   8  -1  845.52   41.10
  -4  -8   1    9.80    2.20
  -4  -8   1    9.40    1.60
   4  -8  -1    9.10    1.80
   4   8  -1   13.30    1.50
  -3  -8   1  553.24   27.70
  -3  -8   1  545.85   26.90
   3  -8  -1  540.75   27.10
  -3   8   1  506.55   27.20
   3   8  -1  554.94   27.00
  -2  -8   1   92.99    5.10
   2  -8  -1   94.79    5.00
   2  -8  -1   81.79    5.00
  -2  -8   1   94.79    5.90
  -2   8   1   86.79    5.40
  -2   8   1   89.79    5.50
   2   8  -1   93.39    5.30
   1  -8  -1   64.99    3.80
  -1  -8   1   65.99    3.90
  -1   8   1   64.69    4.30
   1   8  -1   62.79    4.10
   0  -8  -1   18.00    1.70
   0   8   1   15.00    2.20
   1  -8   1  229.18   12.10
  -1  -8  -1  233.78   12.10
   1   8   1  252.57   12.50
   2  -8   1    7.10    1.10
  -2  -8  -1    8.40    1.40
   2   8   1    8.60    1.50
   3  -8   1  486.45   24.40
  -3  -8  -1  474.75   24.40
  -3  -8  -1  474.75   25.20
   3  -8   1  497.35   24.30
  -3   8  -1  499.65   24.80
   3   8   1  514.45   24.60
  -4  -8  -1   96.29    5.40
  -4  -8  -1   94.99    6.30
   4   8   1  103.79    5.40
   4   8   1   87.99    6.10
   4   8   1   94.19    5.40
  -4   8  -1   95.89    5.80
  -5  -8  -1   64.99    4.00
   5  -8   1   67.79    4.10
   5  -8   1   68.99    5.30
  -5  -8  -1   64.49    4.90
   5   8   1   63.09    4.00
   5   8   1   61.59    3.40
   5   8   1   62.89    3.90
   6  -8   1   36.60    3.20
  -6  -8  -1   45.20    4.00
   6  -8   1   37.10    4.60
  -6  -8  -1   46.90    3.10
   6   8   1   39.80    2.40
   6   8   1   40.10    3.20
   6   8   1   39.70    4.30
   6   8   1   42.70    2.80
  -7  -8  -1   15.20    2.00
   7  -8   1   12.90    3.10
   7  -8   1   13.70    2.00
  -7  -8  -1   15.30    2.70
   7   8   1   13.50    1.40
   7   8   1   14.70    1.10
   7   8   1   16.30    2.80
   7   8   1   15.00    2.30
   8  -8   1    7.80    1.80
  -8  -8  -1    6.70    2.20
   8  -8   1   11.80    3.10
   8   8   1    8.90    1.70
   8   8   1   11.10    1.30
   8   8   1    8.70    2.50
   8   8   1   11.20    1.00
  -9  -8  -1  225.08   13.20
   9  -8   1  248.08   12.60
   9  -8   1  233.58   13.90
  -9  -8  -1  223.78   12.10
  -9   8  -1  229.98   11.90
   9   8   1  231.08   11.40
   9   8   1  235.68   11.80
   9   8   1  224.88   12.30
   9   8   1  215.58   13.50
 -10  -8  -1  115.59    8.20
  10  -8   1  145.79    9.70
 -10  -8  -1  117.69    7.20
  10   8   1  115.39    8.90
  10   8   1  124.89    6.40
  10   8   1  122.19    7.50
 -10   8  -1  134.59    6.90
  10   8   1  128.59    6.70
  11  -8   1   50.29    5.00
 -11   8  -1   57.89    3.60
  11   8   1   60.69    3.50
  11   8   1   59.19    3.20
  12  -8   1   -2.20    3.00
  12  -8   1   -1.00    1.80
 -12  -8  -1   -5.40    3.70
 -12   8  -1    0.50    0.70
  12   8   1   -0.50    0.80
  12   8   1   -3.30    2.60
  12   8   1   -0.40    0.50
  13  -8   1   11.00    2.60
  13  -8   1   14.20    4.40
 -13  -8  -1   12.60    2.70
 -13  -8  -1    9.90    3.20
  13   8   1   12.60    3.90
 -13   8  -1   13.50    1.60
  13   8   1   19.10    3.70
 -14  -8  -1    5.80    1.90
 -14  -8  -1    6.20    3.10
 -14   8  -1    7.10    1.00
  14   8   1   11.30    4.00
 -14   8  -1    9.40    1.50
  14   8   1    7.10    2.50
  14   8   1    8.20    1.30
  14   8   1    8.70    1.00
  15  -8   1    9.30    5.30
 -15  -8  -1   13.90    3.80
 -15  -8  -1   18.50    3.00
 -15   8  -1   18.90    1.50
  15   8   1   17.80    4.50
  15   8   1   19.00    1.30
  15   8   1   21.20    1.70
  15   8   1   20.20    3.90
 -15   8  -1   20.10    2.20
  16  -8   1   -0.30    2.50
  16  -8   1   -1.50    4.30
 -16  -8  -1    1.30    2.70
 -16  -8  -1   -0.70    1.40
  16   8   1    0.60    0.40
  16   8   1   -0.60    2.20
 -16   8  -1    2.00    1.00
 -16   8  -1    0.70    0.50
  16   8   1    0.00    3.00
  16  -9  -1   -1.10    5.20
 -16  -9   1    3.10    3.10
 -16  -9   1    1.10    1.70
  16  -9  -1   -1.10    2.50
 -16   9   1    0.40    2.50
  16   9  -1    2.30    3.50
  16   9  -1   -0.10    2.30
 -16   9   1    2.70    1.20
 -16   9   1    1.50    0.60
  15  -9  -1   52.99    8.80
  15  -9  -1   46.60    5.60
 -15  -9   1   37.50    5.80
 -15  -9   1   42.20    6.00
 -15   9   1   35.30    2.40
  15   9  -1   47.50    6.40
  15   9  -1   38.80    2.20
 -15   9   1   35.90    3.00
 -14  -9   1    5.70    3.10
  14  -9  -1   10.00    4.60
 -14  -9   1    7.70    2.10
 -14   9   1    4.20    1.20
  14   9  -1    5.50    0.90
  14   9  -1   11.00    3.50
  14   9  -1    5.00    1.00
  13  -9  -1   67.99    5.90
 -13  -9   1   63.79    6.20
 -13  -9   1   60.79    4.80
  13  -9  -1   70.29    8.40
  13   9  -1   65.59    3.50
  13   9  -1   58.59    7.00
  13   9  -1   73.69    3.90
 -13   9   1   67.19    4.20
  13   9  -1   63.39    5.30
 -12  -9   1   38.70    4.90
  12  -9  -1   46.80    7.00
  12  -9  -1   45.00    4.90
 -12  -9   1   39.10    3.70
  12   9  -1   42.50    2.80
  12   9  -1   40.10    4.10
 -12   9   1   42.70    3.00
  12   9  -1   44.10    2.80
 -11  -9   1  200.08   11.10
 -11  -9   1  197.58   12.40
  11  -9  -1  200.38   11.70
  11  -9  -1  200.58   14.00
  11   9  -1  207.78   11.20
  11   9  -1  210.58   10.50
 -11   9   1  203.28   10.70
  11   9  -1  193.38   10.30
  11   9  -1  210.88   12.80
  10  -9  -1   20.00    4.60
 -10  -9   1   11.40    6.10
 -10  -9   1   13.30    2.30
  10   9  -1   14.70    3.20
  10   9  -1   17.70    3.70
 -10   9   1   18.30    2.00
  10   9  -1   17.20    1.30
  10   9  -1   21.40    1.80
   9  -9  -1   36.50    5.80
   9  -9  -1   39.90    4.10
   9   9  -1   48.50    2.50
   9   9  -1   46.10    2.80
  -9   9   1   37.70    2.90
  -8  -9   1    2.20    1.20
  -8  -9   1    3.00    2.20
   8  -9  -1    0.20    2.60
   8   9  -1    0.30    1.90
   8   9  -1    2.00    0.50
   8   9  -1    2.70    0.90
   8   9  -1    2.50    1.30
   7  -9  -1  240.78   12.60
  -7  -9   1  236.08   12.30
   7  -9  -1  246.58   14.10
  -7  -9   1  227.58   13.40
   7   9  -1  238.48   12.10
   7   9  -1  233.78   13.00
   7   9  -1  217.98   11.70
   7   9  -1  235.08   12.20
  -6  -9   1    8.40    2.40
  -6  -9   1    9.80    2.00
   6  -9  -1   11.30    2.40
   6   9  -1    7.90    1.90
   6   9  -1   11.80    1.60
   6   9  -1    8.50    2.50
  -5  -9   1   40.10    3.10
  -5  -9   1   39.60    4.10
   5   9  -1   33.80    2.80
   5   9  -1   37.70    2.80
  -4  -9   1  171.38    9.40
   4  -9  -1  198.08    9.60
  -4  -9   1  162.78   10.30
   4   9  -1  173.68    9.50
   3  -9  -1   14.50    2.00
  -3   9   1   17.80    2.30
  -3   9   1   14.20    2.40
   3   9  -1   21.10    2.10
   2  -9  -1   22.40    1.80
  -2   9   1   18.90    2.50
   1  -9  -1 1013.80   50.79
  -1  -9   1  971.70   50.79
   1   9  -1 1073.19   51.19
  -1   9   1 1081.19   51.19
   0  -9  -1   81.89    4.60
   0  -9   1   79.29    4.60
   0   9   1   82.99    5.00
   0   9  -1   76.69    5.10
   1  -9   1   29.10    2.20
  -1  -9  -1   30.10    2.20
   1   9   1   22.30    2.60
   2  -9   1   61.29    3.50
  -2  -9  -1   56.19    3.60
   2   9   1   54.39    3.80
   3  -9   1  135.89    7.00
   3  -9   1  127.79    7.00
   4  -9   1   72.09    4.20
  -4  -9  -1   69.59    5.20
  -4  -9  -1   68.09    4.30
   4   9   1   72.39    5.20
  -4   9  -1   56.39    4.80
   4   9   1   73.89    4.30
  -5  -9  -1    4.20    1.30
  -5  -9  -1    4.80    2.00
   5   9   1    2.20    2.10
   5   9   1    6.60    1.20
   5   9   1    4.10    1.30
  -6  -9  -1   26.90    3.60
   6   9   1   26.60    3.90
   6   9   1   25.90    2.80
   6   9   1   31.10    2.30
   6   9   1   28.60    1.80
  -7  -9  -1   -0.80    1.80
  -7  -9  -1    0.70    1.10
   7   9   1    0.10    0.50
   7   9   1    0.20    1.90
   7   9   1   -0.20    0.80
   7   9   1    1.40    1.20
  -8  -9  -1    6.50    1.60
   8  -9   1    8.50    3.10
  -8  -9  -1    3.40    2.30
   8  -9   1    6.50    1.90
   8   9   1    6.70    1.70
   8   9   1    7.80    0.90
   8   9   1    8.40    1.30
   8   9   1    7.70    2.50
   9  -9   1   74.09    5.60
  -9  -9  -1   72.39    6.30
   9  -9   1   77.89    7.40
  -9  -9  -1   76.99    5.10
   9   9   1   82.39    4.60
   9   9   1   84.99    4.60
   9   9   1   83.49    5.90
   9   9   1   83.99    6.90
 -10  -9  -1    3.50    2.50
 -10  -9  -1    4.50    1.60
  10   9   1    3.80    1.80
 -10   9  -1    1.30    1.00
  10   9   1    6.50    3.10
  11  -9   1   40.70    7.60
  11  -9   1   47.00    5.00
 -11  -9  -1   52.09    8.30
 -11  -9  -1   52.09    4.10
  11   9   1   57.79    3.30
 -11   9  -1   54.69    3.40
  11   9   1   51.69    4.50
  11   9   1   55.39    2.90
  11   9   1   51.29    6.20
  12  -9   1   24.00    4.20
 -12  -9  -1   17.90    3.70
 -12  -9  -1   17.20    2.80
  12  -9   1   25.50    4.70
  12   9   1   19.90    3.50
  12   9   1   23.40    1.90
 -12   9  -1   21.80    2.00
  12   9   1   25.30    4.60
  12   9   1   22.20    1.50
 -13  -9  -1   27.60    3.50
 -13  -9  -1   27.00    4.60
  13  -9   1   51.89    7.40
  13   9   1   31.90    6.20
  13   9   1   38.30    2.50
 -13   9  -1   36.50    2.60
  13   9   1   32.60    4.30
  13   9   1   35.60    2.10
  14  -9   1   16.70    5.10
 -14  -9  -1    8.70    2.20
 -14  -9  -1   12.90    3.70
  14   9   1   15.80    1.60
  14   9   1   14.60    1.20
  14   9   1   13.20    2.90
  14   9   1   11.50    4.00
 -15  -9  -1   50.09    4.40
  15  -9   1   37.10    5.50
  15  -9   1   34.90    6.80
 -15  -9  -1   53.19    6.10
 -15   9  -1   46.30    3.20
 -15   9  -1   43.40    2.70
  15   9   1   49.00    2.70
  15   9   1   51.99    3.00
  15   9   1   55.99    7.30
 -16  -9  -1    1.20    1.80
 -16  -9  -1    2.60    3.30
  16  -9   1    1.30    2.60
  16   9   1    1.70    0.40
  16   9   1    3.40    0.90
  16   9   1    0.60    2.40
  16   9   1    0.80    3.40
 -16   9  -1    2.60    1.00
 -16   9  -1    1.50    0.50
 -15 -10   1   78.19    7.70
  15 -10  -1   78.09   10.10
 -15 -10   1   73.69    5.80
  15 -10  -1   78.79    7.00
  15  10  -1   81.09    8.20
  15  10  -1   81.49    6.30
  15  10  -1   81.89    4.50
  15  10  -1   79.49    4.10
 -15  10   1   75.29    5.80
 -15  10   1   77.49    4.90
 -14 -10   1  120.59    9.70
  14 -10  -1  125.99    9.00
  14 -10  -1  132.59   12.30
 -14 -10   1  127.59   10.10
 -14  10   1  127.29    7.30
  14  10  -1  131.59    6.60
  14  10  -1  138.89    7.00
  14  10  -1  133.09   10.30
  14  10  -1  131.69    8.40
  13 -10  -1    9.20    2.70
 -13 -10   1   16.20    3.00
  13 -10  -1    6.10    4.50
 -13 -10   1   11.40    3.30
  13  10  -1   10.80    1.10
  13  10  -1    8.80    3.60
  13  10  -1   11.20    1.50
  13  10  -1   15.70    3.40
 -13  10   1    9.80    1.60
 -12 -10   1   10.30    3.50
 -12 -10   1   14.70    2.90
  12 -10  -1   13.70    4.30
  12 -10  -1   11.30    2.80
  12  10  -1   18.00    5.10
  12  10  -1   16.70    1.30
 -12  10   1   16.00    1.80
  12  10  -1   13.10    2.50
  12  10  -1   18.60    1.70
 -11 -10   1   76.79    6.50
  11 -10  -1   57.09    7.90
 -11 -10   1   74.09    4.80
  11 -10  -1   50.89    5.50
 -11  10   1   50.09    5.00
  11  10  -1   70.09    4.90
  11  10  -1   58.69    3.80
  11  10  -1   76.79    6.80
  11  10  -1   58.29    3.40
  10 -10  -1   12.20    4.40
 -10 -10   1   11.80    3.20
  10  10  -1   14.90    1.30
 -10  10   1   13.20    1.90
  10  10  -1   16.00    1.70
  10  10  -1   19.20    3.10
  -9 -10   1    0.70    1.50
   9 -10  -1   -4.10    3.30
  -9 -10   1   -0.20    2.30
   9 -10  -1    3.30    1.90
   9  10  -1    3.40    1.00
   9  10  -1    2.80    0.60
   9  10  -1    1.80    1.50
   9  10  -1    3.20    2.30
   8 -10  -1   63.49    5.10
  -8 -10   1   63.89    5.70
  -8 -10   1   66.79    4.60
   8  10  -1   70.69    4.10
   8  10  -1   64.69    5.50
   8  10  -1   67.39    3.70
   8  10  -1   71.19    4.50
   7 -10  -1    4.20    1.80
  -7 -10   1    8.00    2.50
  -7 -10   1    5.10    1.50
   7  10  -1    5.60    2.10
   7  10  -1    6.50    1.30
   7  10  -1    6.20    1.30
  -6 -10   1  326.97   16.60
   6 -10  -1  328.17   16.70
  -6 -10   1  307.67   17.60
   6  10  -1  320.57   16.40
   6  10  -1  313.57   16.20
  -5 -10   1  263.97   15.20
   5 -10  -1  275.07   14.30
  -5 -10   1  266.17   14.10
   5  10  -1  282.17   14.70
   5  10  -1  268.77   14.10
  -4 -10   1    0.10    1.00
   4 -10  -1    1.90    1.10
  -4 -10   1    0.10    1.70
   4  10  -1    0.50    1.00
  -4  10   1    0.60    1.20
   3 -10  -1   87.19    5.40
   3 -10  -1   98.99    5.20
  -3  10   1   92.49    5.80
   2 -10  -1  157.78    8.10
  -2 -10   1  147.89    8.30
  -2  10   1  149.69    8.70
   2  10  -1  158.78    8.60
   1 -10  -1    0.70    0.70
  -1 -10   1    0.00    0.90
  -1  10   1   -1.50    1.20
   1  10  -1    0.10    1.20
   0 -10  -1  247.68   13.20
   0 -10   1  244.78   13.20
   0  10  -1  268.57   13.70
   0  10   1  269.27   13.70
  -1 -10  -1   57.29    3.70
   1 -10   1   55.89    3.60
   1  10   1   62.09    4.10
   2 -10   1   35.70    2.70
  -2 -10  -1   43.70    3.00
   2  10   1   37.60    3.20
   3 -10   1   54.89    3.30
   3 -10   1   49.30    3.40
   3  10   1   56.79    3.70
   4 -10   1   20.80    2.20
  -4 -10  -1   22.40    2.30
   4  10   1   20.00    2.10
   4  10   1   27.60    2.20
  -5 -10  -1   12.20    2.70
  -5 -10  -1    8.90    1.60
   5 -10   1    9.20    2.00
   5  10   1    9.60    2.40
   5  10   1   12.30    1.70
   5  10   1    8.50    1.90
  -6 -10  -1   21.80    2.70
  -6 -10  -1   24.40    3.70
   6 -10   1   26.40    3.00
   6  10   1   29.50    3.90
   6  10   1   18.60    1.70
   6  10   1   22.30    2.20
   6  10   1   27.50    2.70
   7 -10   1  161.88    9.30
  -7 -10  -1  169.88    9.20
  -7 -10  -1  178.98   10.50
   7 -10   1  160.08   10.80
   7  10   1  163.48   10.20
   7  10   1  167.58    9.10
   7  10   1  163.88    8.40
   7  10   1  165.08    8.90
   8 -10   1   55.69    6.60
  -8 -10  -1   62.69    4.50
  -8 -10  -1   61.09    5.70
   8  10   1   67.49    4.70
   8  10   1   68.49    6.10
   8  10   1   67.49    3.60
   8  10   1   68.49    4.00
   9 -10   1    5.40    3.10
  10 -10   1    2.00    1.90
 -10 -10  -1   -1.40    2.40
 -10 -10  -1    0.20    1.50
  10 -10   1    0.60    3.10
  10  10   1    0.10    0.80
  10  10   1    2.70    2.60
  10  10   1    0.60    1.60
  10  10   1    0.30    0.50
 -10  10  -1   -1.00    0.80
  11 -10   1   80.99    8.80
 -11 -10  -1   87.29    5.90
  11 -10   1   82.89    6.50
 -11 -10  -1   88.49    7.30
  11  10   1   93.09    6.10
  11  10   1   90.29    5.00
 -11  10  -1   83.69    5.20
  11  10   1   89.19    4.70
  11  10   1   97.79    7.90
  12 -10   1   17.20    4.30
  12 -10   1   15.40    3.80
 -12 -10  -1   12.30    2.20
 -12 -10  -1   11.20    3.30
 -12  10  -1   10.30    1.60
  12  10   1   11.20    3.70
  12  10   1   10.30    2.40
  12  10   1   11.80    1.60
  12  10   1   11.20    1.10
 -13 -10  -1   -0.60    1.60
  13 -10   1    2.50    2.20
  13 -10   1    3.40    3.60
 -13 -10  -1   -1.40    2.60
  13  10   1   -1.40    2.00
  13  10   1    1.20    0.90
  13  10   1    1.00    0.50
 -13  10  -1    1.20    1.00
  13  10   1   -1.80    3.10
 -14 -10  -1   71.39    7.60
 -14 -10  -1   73.39    5.90
  14 -10   1   88.99    7.00
  14 -10   1   90.49   10.00
  14  10   1   82.09    8.60
  14  10   1   81.39    4.40
 -14  10  -1   79.39    4.90
  14  10   1   97.99    5.80
  14  10   1   83.39    6.50
 -15 -10  -1   -1.40    1.70
  15 -10   1   -0.80    2.50
  15 -10   1   -3.30    4.20
 -15 -10  -1   -2.10    3.00
  15  10   1    0.00    0.50
  15  10   1   -0.10    0.80
  15  10   1    1.10    2.20
  15  10   1    0.70    3.10
 -15  10  -1    0.00    0.90
 -15 -11   1   -0.60    3.30
  15 -11  -1    2.50    2.70
  15 -11  -1    0.90    5.00
 -15 -11   1    1.30    2.10
 -15  11   1    2.30    2.10
  15  11  -1    0.30    1.00
  15  11  -1    2.00    3.00
 -15  11   1    0.40    1.00
  15  11  -1    2.00    2.40
  14 -11  -1   30.30    5.00
 -14 -11   1   23.90    4.00
 -14 -11   1   24.70    5.00
  14 -11  -1   31.60    6.70
  14  11  -1   44.30    6.30
  14  11  -1   29.10    2.00
 -14  11   1   36.80    3.90
  14  11  -1   32.80    4.30
  14  11  -1   38.50    3.30
 -14  11   1   33.00    2.70
 -13 -11   1    7.30    3.40
  13 -11  -1    8.80    4.60
 -13 -11   1   10.40    2.90
  13  11  -1   12.10    3.70
  13  11  -1   10.90    1.10
  13  11  -1   12.90    1.90
 -13  11   1    8.10    2.30
  13  11  -1    9.50    2.50
 -13  11   1   13.80    1.80
  12 -11  -1    4.30    4.00
  12 -11  -1   -0.20    2.10
 -12 -11   1   -0.10    2.60
 -12 -11   1   -1.60    1.60
 -12  11   1   -0.30    0.90
  12  11  -1   -0.30    2.70
  12  11  -1    1.00    0.90
  12  11  -1   -1.30    1.80
  12  11  -1    0.40    0.50
 -11 -11   1    1.10    2.60
 -11 -11   1    5.00    1.80
  11 -11  -1    6.80    2.40
  11  11  -1    4.50    1.90
  11  11  -1    5.30    2.90
 -11  11   1    2.90    1.20
 -10 -11   1  156.08    9.40
 -10 -11   1  148.89   10.70
  10 -11  -1  168.08   10.00
  10  11  -1  162.88    8.30
 -10  11   1  155.08    9.00
  10  11  -1  167.38    8.70
  10  11  -1  168.98    9.20
  10  11  -1  168.88   10.70
  -9 -11   1    3.60    1.70
  -9 -11   1    0.80    2.50
   9 -11  -1    1.60    2.00
   9  11  -1    3.60    1.50
   9  11  -1    2.70    1.00
   9  11  -1    3.70    2.40
   9  11  -1    2.50    0.60
  -8 -11   1    8.40    2.70
   8 -11  -1    5.20    2.00
   8  11  -1    5.50    1.20
   8  11  -1    5.70    1.10
  -7 -11   1  102.29    6.10
   7 -11  -1   97.39    6.50
   7  11  -1   89.29    5.10
   7  11  -1   98.29    5.70
   7  11  -1   97.79    5.70
  -6 -11   1   84.89    6.90
  -6 -11   1   90.09    5.70
   6 -11  -1   95.49    6.00
   6  11  -1   92.29    5.40
   6  11  -1   84.39    5.20
   5 -11  -1   79.59    5.30
  -5 -11   1   79.59    5.20
  -5 -11   1   74.59    6.30
   5  11  -1   82.99    5.10
  -5  11   1   83.79    5.50
  -4 -11   1   55.79    4.10
  -4 -11   1   48.20    5.10
   4 -11  -1   57.89    4.10
  -4  11   1   59.29    4.40
   4  11  -1   62.39    4.10
  -3 -11   1   84.29    5.40
   3 -11  -1   96.09    5.10
   3  11  -1   84.89    5.60
  -3  11   1   90.59    5.80
   2 -11  -1   57.79    3.50
  -2 -11   1   52.39    3.70
   2  11  -1   47.00    4.00
  -2  11   1   50.29    4.10
  -1 -11   1    1.90    1.20
   1  11  -1   -2.60    1.30
   0 -11   1   11.30    1.90
  -1 -11  -1   61.99    4.20
   1 -11   1   64.49    4.10
   1  11   1   66.19    4.50
  -1  11  -1   73.09    4.80
   2 -11   1  204.98   10.80
  -2 -11  -1  206.68   11.00
   2  11   1  209.68   11.30
   3 -11   1  253.27   13.10
  -3 -11  -1  258.27   13.40
   3  11   1  255.97   13.50
   4 -11   1   67.09    4.20
  -4 -11  -1   60.59    4.40
   4  11   1   71.89    4.40
   4  11   1   62.69    4.20
  -5 -11  -1  185.68   10.10
   5 -11   1  190.68   10.10
   5  11   1  194.48   10.00
   5  11   1  183.68    9.90
   5  11   1  171.08   10.80
   6 -11   1    9.80    2.40
  -6 -11  -1    8.20    2.60
   6  11   1    6.80    1.50
   6  11   1    7.40    1.10
  -7 -11  -1   54.79    5.60
  -7 -11  -1   61.79    4.40
   7 -11   1   59.19    4.70
   7  11   1   61.49    4.30
   7  11   1   60.59    5.50
   7  11   1   61.99    3.90
   7  11   1   58.09    3.40
  -8 -11  -1   59.49    6.00
   8 -11   1   60.29    5.00
  -8 -11  -1   59.19    4.60
   8  11   1   68.19    4.70
   8  11   1   65.19    4.10
   8  11   1   75.19    6.30
   8  11   1   61.89    3.60
   9 -11   1    8.30    3.50
  -9 -11  -1    4.10    1.80
  -9 -11  -1    1.90    2.70
   9  11   1    7.00    1.30
   9  11   1    6.50    2.70
   9  11   1    6.90    1.10
  10 -11   1   48.80    5.10
 -10 -11  -1   53.79    4.50
 -10 -11  -1   62.29    6.20
  10 -11   1   59.09    7.50
  10  11   1   66.89    4.70
  10  11   1   52.69    3.10
  10  11   1   49.40    3.50
  11 -11   1    5.90    4.10
 -11 -11  -1    8.00    3.20
 -11 -11  -1   11.10    2.30
  11  11   1   11.50    1.10
  11  11   1   11.00    3.60
  11  11   1   16.00    2.80
  11  11   1   11.70    2.40
  12 -11   1    5.20    4.00
 -12 -11  -1    3.10    3.00
  12 -11   1    3.60    2.20
 -12 -11  -1    3.40    1.80
  12  11   1    5.80    1.10
 -12  11  -1    5.20    1.20
  12  11   1    8.90    3.50
  12  11   1    6.20    1.00
  12  11   1    3.60    2.10
  13 -11   1   91.99   10.00
 -13 -11  -1   75.89    6.00
 -13 -11  -1   70.49    7.50
  13 -11   1   92.69    6.80
  13  11   1   84.99    8.30
  13  11   1   88.49    5.00
  13  11   1   80.79    6.30
 -13  11  -1   88.69    5.10
  13  11   1   86.59    4.50
  14 -11   1    4.30    2.50
 -14 -11  -1    1.50    2.10
 -14 -11  -1    2.10    3.40
  14 -11   1    5.40    4.60
  14  11   1    2.10    0.60
 -14  11  -1    3.50    1.10
  14  11   1    1.00    1.00
  14  11   1    2.10    2.50
  14  11   1    6.10    3.40
 -15 -11  -1   34.10    4.10
 -15 -11  -1   37.00    5.70
  15 -11   1   29.10    6.30
  15 -11   1   31.80    5.10
  15  11   1   34.90    4.50
 -15  11  -1   35.30    2.80
  15  11   1   36.00    2.60
  15  11   1   34.70    2.10
  15  11   1   35.30    6.50
 -14 -12   1   31.60    6.10
  14 -12  -1   60.19    6.30
 -14 -12   1   44.70    4.80
  14  12  -1   47.20    3.20
 -14  12   1   49.80    3.60
  14  12  -1   47.80    4.90
  14  12  -1   47.40    2.80
  14  12  -1   54.29    6.50
 -13 -12   1   -0.10    1.90
 -13 -12   1    0.30    3.10
  13  12  -1    1.40    2.10
 -13  12   1    3.10    1.20
 -13  12   1    7.70    2.20
  13  12  -1    1.30    3.00
  13  12  -1    0.60    0.90
 -12 -12   1   -3.10    1.80
  12 -12  -1   -0.80    2.30
 -12 -12   1   -0.60    3.10
 -12  12   1    0.70    0.90
  12  12  -1   -2.30    2.60
  12  12  -1   -1.70    1.80
 -12  12   1   -2.00    1.70
  12  12  -1   -0.70    0.40
  12  12  -1   -1.10    0.80
 -11 -12   1    3.30    2.10
 -11 -12   1    7.90    3.50
  11 -12  -1    5.20    2.60
 -11  12   1    7.20    1.50
  11  12  -1    5.20    0.80
  11  12  -1    4.20    2.00
  11  12  -1    4.10    3.10
  11  12  -1    6.30    1.40
 -11  12   1    2.00    2.10
 -10 -12   1   30.90    5.30
  10 -12  -1   35.70    4.50
 -10 -12   1   30.60    3.90
  10  12  -1   36.80    2.30
 -10  12   1   31.80    3.80
  10  12  -1   38.30    3.70
  10  12  -1   35.70    5.30
  10  12  -1   38.90    3.20
  -9 -12   1   57.89    6.20
  -9 -12   1   63.39    5.10
   9 -12  -1   66.39    5.60
   9  12  -1   74.09    3.80
  -9  12   1   57.49    5.10
   9  12  -1   79.19    6.30
   9  12  -1   69.49    4.80
   8 -12  -1   -0.10    1.80
  -8 -12   1    1.30    2.60
  -8 -12   1   -0.40    1.50
  -8  12   1   -0.20    1.60
   8  12  -1    1.20    1.10
   8  12  -1    0.80    0.60
   8  12  -1    0.60    1.30
  -7 -12   1    8.20    1.90
  -7 -12   1    7.90    2.90
   7 -12  -1    7.50    2.30
   7  12  -1    8.80    1.60
   7  12  -1   10.50    2.10
   7  12  -1    8.70    1.20
   6 -12  -1  163.88    9.30
  -6 -12   1  153.38   10.40
  -6 -12   1  156.98    9.10
  -6  12   1  163.98    9.60
   6  12  -1  154.48    8.80
  -5 -12   1   29.30    4.90
   5 -12  -1   31.70    3.20
  -5 -12   1   22.90    3.10
   5  12  -1   29.30    2.90
  -5  12   1   29.80    3.40
  -4 -12   1    9.40    1.70
   4 -12  -1    6.00    1.60
   4  12  -1    6.20    1.60
  -4  12   1    6.00    1.70
  -3 -12   1   76.09    5.00
   3  12  -1   70.39    5.10
  -3  12   1   85.09    5.50
  -2 -12   1  220.88   12.10
   2 -12  -1  229.48   11.90
  -2  12   1  237.38   12.60
   2  12  -1  220.48   12.40
  -1 -12   1  316.47   17.80
   1 -12  -1  363.86   17.80
  -1  12   1  386.96   18.50
   1  12  -1  324.67   18.20
   0 -12   1   29.30    2.80
   0 -12  -1   31.90    2.80
   0  12  -1   23.00    3.40
   0  12   1   28.00    3.60
  -1 -12  -1  204.58   11.70
   1 -12   1  251.97   11.90
   1  12   1  212.68   12.20
  -2 -12  -1    1.00    1.10
   2  12   1   -1.60    1.40
  -2  12  -1   -2.10    1.70
  -3 -12  -1   84.99    5.60
   3 -12   1   98.49    5.40
   3  12   1   90.09    5.70
  -4 -12  -1   21.00    2.70
   4  12   1   26.70    2.50
   4  12   1   20.40    2.50
  -5 -12  -1   47.50    3.80
   5 -12   1   42.60    3.60
   5  12   1   48.30    3.60
   5  12   1   45.90    3.50
  -6 -12  -1   67.89    4.80
   6 -12   1   62.39    4.90
   6  12   1   65.89    4.50
   6  12   1   65.09    3.70
   6  12   1   67.39    4.40
   7 -12   1   45.00    4.40
  -7 -12  -1   54.39    4.30
   7  12   1   57.29    4.00
   7  12   1   59.49    5.40
   7  12   1   49.00    4.00
   7  12   1   50.49    3.10
  -8 -12  -1    1.60    2.60
  -8 -12  -1    1.60    1.70
   8  12   1    3.00    1.70
   8  12   1    4.00    2.70
   8  12   1    3.90    1.50
   8  12   1    2.20    0.70
  -9 -12  -1  220.28   12.50
  -9 -12  -1  214.08   13.90
   9 -12   1  233.08   12.90
   9  12   1  228.58   12.40
   9  12   1  228.58   13.70
   9  12   1  231.98   12.00
   9  12   1  234.68   11.50
 -10 -12  -1   65.69    6.60
  10 -12   1   65.59    5.70
 -10 -12  -1   65.39    5.10
  10  12   1   65.89    3.70
  10  12   1   63.39    5.10
  10  12   1   74.19    6.90
  10  12   1   66.69    4.20
 -11 -12  -1   17.00    3.30
 -11 -12  -1   18.40    4.00
  11 -12   1   24.30    4.10
  11  12   1   18.50    2.00
  11  12   1   18.80    1.60
 -11  12  -1   19.70    2.10
  11  12   1   20.80    3.50
 -12 -12  -1   -1.80    2.80
 -12 -12  -1   -1.70    2.80
  12 -12   1    1.30    3.70
  12 -12   1    1.20    2.10
  12  12   1    0.40    0.50
  12  12   1   -1.00    3.00
  12  12   1   -1.40    2.00
 -12  12  -1    0.20    0.90
  12  12   1    1.20    0.90
 -13 -12  -1   -2.60    3.00
  13 -12   1    8.40    4.70
 -13 -12  -1   -2.20    1.90
  13  12   1    0.90    1.00
  13  12   1    0.90    0.50
 -13  12  -1    3.30    1.10
  13  12   1    1.10    2.20
  13  12   1    1.40    3.30
  14 -12   1   23.20    5.60
 -14 -12  -1   13.00    2.70
 -14 -12  -1    8.60    4.10
  14  12   1   11.80    3.90
  14  12   1   12.90    1.90
 -14  12  -1   17.10    2.10
  14  12   1   14.30    1.30
 -13 -13   1   31.10    4.30
 -13 -13   1   32.10    5.80
  13 -13  -1   34.80    5.70
  13  13  -1   31.90    4.10
  13  13  -1   29.30    2.10
  13  13  -1   30.70    2.60
  13  13  -1   36.50    5.90
 -13  13   1   34.40    2.90
  12 -13  -1    5.40    2.60
 -12 -13   1    2.40    3.50
 -12 -13   1    2.80    2.20
  12  13  -1    4.10    3.00
 -12  13   1    4.70    2.20
  12  13  -1    3.70    0.70
  12  13  -1    2.80    2.00
  12  13  -1    5.70    1.30
 -12  13   1    5.90    1.40
 -11 -13   1    2.40    3.20
 -11 -13   1    4.50    2.20
  11 -13  -1   10.80    2.80
  11  13  -1    6.90    1.20
  11  13  -1    9.30    1.60
 -11  13   1   14.10    2.70
 -11  13   1   10.30    1.70
  11  13  -1    7.40    2.10
  11  13  -1   10.70    3.30
 -10 -13   1   11.00    4.00
 -10 -13   1    9.70    3.80
  10  13  -1   13.30    1.50
 -10  13   1   22.20    3.50
  10  13  -1   14.40    2.00
  10  13  -1   14.50    3.40
  10  13  -1   15.20    2.40
  -9 -13   1   -1.60    1.70
  -9 -13   1   -0.30    2.60
   9  13  -1    1.20    1.00
   9  13  -1    0.70    0.60
   9  13  -1   -1.20    1.50
  -8 -13   1   11.40    3.30
   8 -13  -1   14.50    2.70
  -8 -13   1   10.70    2.30
   8  13  -1   13.10    1.50
   8  13  -1   10.90    1.80
  -8  13   1   10.40    2.60
  -7 -13   1    6.80    2.80
  -7 -13   1    3.10    1.80
   7  13  -1    1.80    0.80
   7  13  -1    3.00    1.40
   7  13  -1    3.80    1.30
  -7  13   1    6.60    2.10
  -6 -13   1   75.89    5.40
  -6 -13   1   77.59    6.70
   6 -13  -1   73.09    5.40
  -6  13   1   75.99    5.60
   6  13  -1   76.89    5.00
   5 -13  -1  139.59    8.30
  -5 -13   1  134.39    8.30
   5  13  -1  142.29    8.30
  -5  13   1  149.39    8.70
  -4 -13   1   65.59    5.00
  -4  13   1   68.69    5.30
   4  13  -1   77.49    5.60
  -3 -13   1    7.10    1.70
  -3  13   1    8.00    2.20
  -2 -13   1   44.80    3.70
   2 -13  -1   48.90    3.40
  -2  13   1   45.40    4.40
  -1 -13   1   61.79    4.20
   1 -13  -1   54.99    3.90
  -1  13   1   60.49    5.80
   0 -13  -1   16.00    2.20
   0 -13   1   16.30    2.30
   0  13  -1   10.50    3.50
   1 -13   1   79.19    4.90
  -1 -13  -1   72.09    4.90
  -1  13  -1   87.19    6.40
  -2 -13  -1  143.89    8.30
   2 -13   1  149.19    8.10
  -2  13  -1  148.09    8.90
   2  13   1  143.49    9.50
   3 -13   1    1.00    0.90
  -3 -13  -1    0.70    1.30
   3  13   1   -0.10    1.40
  -3  13  -1    2.20    1.80
  -4 -13  -1   82.89    6.00
   4  13   1   96.89    6.00
  -4  13  -1  106.49    6.70
  -5 -13  -1   83.89    5.70
   5 -13   1   79.89    5.60
   5  13   1   88.89    5.50
   5  13   1   84.29    5.30
  -6 -13  -1  196.68   10.50
   6 -13   1  180.18   10.40
   6  13   1  174.28    9.50
   6  13   1  184.88   10.00
   6  13   1  194.68   10.20
  -7 -13  -1   16.20    3.00
   7 -13   1   15.80    3.60
   7  13   1   12.80    2.00
   7  13   1   18.00    2.80
   7  13   1   11.40    1.50
  -8 -13  -1    4.60    1.90
   8 -13   1    5.20    2.10
   8  13   1   12.30    2.80
   8  13   1    7.00    1.50
   8  13   1    8.40    1.40
  -9 -13  -1   21.50    3.50
   9 -13   1   18.70    3.70
   9  13   1   17.50    2.10
   9  13   1   18.20    1.70
   9  13   1   21.70    3.30
 -10 -13  -1    7.30    2.20
  10  13   1   13.90    3.60
  10  13   1   10.50    1.30
  10  13   1   10.00    2.30
  10  13   1   11.80    1.80
  11 -13   1   -0.60    2.90
 -11 -13  -1   -1.20    1.90
 -11 -13  -1   -1.00    3.00
  11  13   1   -2.40    2.80
  11  13   1    1.20    1.00
  11  13   1    0.60    1.90
 -11  13  -1    0.20    0.90
  11  13   1    1.00    0.60
  12 -13   1   73.49    6.50
 -12 -13  -1   72.59    7.30
 -12 -13  -1   69.09    5.80
  12  13   1   79.09    5.80
 -12  13  -1   76.59    4.90
  12  13   1   77.39    4.20
  12  13   1   81.59    4.70
  12  13   1   80.29    7.40
 -13 -13  -1   81.29    8.00
  13 -13   1   84.29    7.10
 -13 -13  -1   79.69    6.30
 -13  13  -1   78.79    5.10
  13  13   1   88.29    6.40
  13  13   1   93.89    8.10
  13  13   1   80.39    4.50
  13  13   1   82.69    5.00
  13 -14  -1    6.70    3.10
 -13 -14   1    4.90    2.50
 -13 -14   1    5.00    5.20
 -13  14   1   12.00    2.00
  13  14  -1    9.00    1.50
  13  14  -1   12.60    3.50
  13  14  -1    9.40    2.40
 -12 -14   1   13.80    2.90
  12 -14  -1   16.00    4.50
 -12 -14   1   13.10    4.40
  12  14  -1   18.70    2.10
 -12  14   1   18.80    2.30
  12  14  -1   15.30    3.70
  12  14  -1   17.70    1.50
  12  14  -1   14.40    3.20
  11 -14  -1   33.00    4.80
 -11 -14   1   17.40    4.70
 -11 -14   1   18.10    3.80
  11  14  -1   28.80    2.50
  11  14  -1   19.50    3.30
 -11  14   1   29.90    2.70
  11  14  -1   26.30    1.90
 -10 -14   1    3.00    3.50
 -10 -14   1    5.90    2.40
  10 -14  -1    8.40    2.70
  10  14  -1   10.50    2.20
  10  14  -1   11.40    1.90
 -10  14   1    9.60    2.50
  10  14  -1   12.20    1.40
   9 -14  -1    9.40    2.70
  -9 -14   1    9.10    3.50
  -9 -14   1    9.30    2.50
   9  14  -1   12.80    2.10
   9  14  -1   14.70    1.60
   9  14  -1   14.20    2.60
   8 -14  -1   35.10    4.10
  -8 -14   1   25.60    4.90
  -8 -14   1   29.70    4.10
  -8  14   1   32.80    3.90
   8  14  -1   32.70    3.00
   8  14  -1   29.80    2.30
  -7 -14   1   -2.00    1.70
   7 -14  -1   -1.00    1.70
   7  14  -1   -0.70    1.10
  -7  14   1    0.00    1.80
   7  14  -1   -1.00    0.70
  -6 -14   1   22.70    3.30
  -6  14   1   24.30    3.40
   6  14  -1   23.90    2.70
  -5  14   1    7.50    2.20
   5  14  -1    4.20    1.70
  -4 -14   1   61.09    4.80
  -4  14   1   67.09    5.20
   4  14  -1   61.99    4.70
  -3 -14   1    3.00    1.50
   3  14  -1    0.00    1.50
  -3  14   1    2.00    1.70
  -2 -14   1   53.79    4.30
   2  14  -1   54.79    4.50
   1 -14  -1   16.50    2.40
  -1  14   1   26.60    3.40
   0 -14   1  279.17   15.90
   0 -14  -1  306.97   15.90
   0  14  -1  301.77   16.60
   0  14   1  335.97   16.60
   1 -14   1    9.10    1.70
   1  14   1    6.60    2.10
   2 -14   1   92.39    5.40
  -2 -14  -1   83.29    5.60
  -2  14  -1   93.49    6.30
   2  14   1   79.79    5.80
   3 -14   1   33.80    2.80
  -3 -14  -1   29.00    3.20
   3  14   1   23.50    3.10
  -3  14  -1   26.20    3.50
  -4 -14  -1   -0.50    1.40
  -4  14  -1   -1.10    1.70
   4  14   1   -0.30    1.30
  -5 -14  -1   72.39    5.30
   5  14   1   76.79    5.00
  -5  14  -1   67.09    5.60
  -6 -14  -1   99.49    6.20
   6 -14   1   83.99    6.00
  -6  14  -1   89.89    6.50
   6  14   1   95.99    5.80
   6  14   1   87.89    5.00
   6  14   1   86.49    5.60
  -7 -14  -1   77.69    5.60
   7 -14   1   69.19    6.40
   7  14   1   76.39    5.20
   7  14   1   76.99    4.40
  -7  14  -1   77.99    6.00
   7  14   1   83.69    5.10
  -8 -14  -1  217.18   12.40
   8 -14   1  221.68   12.60
   8  14   1  219.28   12.30
   8  14   1  227.58   11.90
   8  14   1  222.18   11.30
  -9 -14  -1    7.80    3.20
   9  14   1    9.70    2.20
   9  14   1   11.20    1.50
   9  14   1    8.80    1.60
  10 -14   1   44.20    5.00
 -10 -14  -1   35.80    4.30
  10  14   1   41.70    5.70
  10  14   1   44.20    3.30
  10  14   1   40.40    2.60
  11 -14   1   19.50    4.20
 -11 -14  -1   19.70    3.60
  11  14   1   12.20    3.60
  11  14   1   15.50    3.30
 -11  14  -1   13.00    2.00
  11  14   1   16.20    1.50
  11  14   1   19.60    2.10
  12 -14   1   50.49    5.70
 -12 -14  -1   56.99    5.20
 -12  14  -1   51.29    3.90
  12  14   1   56.29    3.70
  12  14   1   54.99    6.90
  12  14   1   52.49    3.70
  12  14   1   54.89    4.80
 -12  14  -1   55.39    5.30
 -13  14  -1    5.90    1.40
  13  14   1    8.70    3.40
  13  14   1    2.60    1.20
 -12 -15   1    4.90    2.40
  12 -15  -1    1.30    2.50
  12  15  -1    4.20    1.90
 -12  15   1    4.90    2.50
  12  15  -1    5.80    1.40
 -12  15   1    7.50    1.80
  12  15  -1    5.80    1.10
 -11 -15   1    1.20    2.40
  11 -15  -1   -1.00    2.30
  11  15  -1   -1.00    1.50
  11  15  -1    3.60    1.30
 -11  15   1   -0.60    1.10
  11  15  -1    1.70    0.70
  10 -15  -1    7.10    2.50
 -10 -15   1    5.60    2.50
  10  15  -1    8.70    1.60
   9 -15  -1    0.10    2.10
  -9 -15   1    1.60    2.10
   9  15  -1    2.20    1.30
   9  15  -1    1.40    0.80
  -9  15   1    5.10    2.40
   8 -15  -1   82.29    6.40
  -8 -15   1   80.19    6.20
   8  15  -1   81.59    4.70
  -8  15   1   84.09    6.40
   8  15  -1   84.69    5.40
   7 -15  -1   33.70    4.30
   7  15  -1   32.80    2.60
  -7  15   1   36.90    4.10
   7  15  -1   38.80    3.30
  -6 -15   1   -0.40    3.40
  -6  15   1   -1.80    1.60
  -5 -15   1   36.30    4.00
   5  15  -1   35.00    3.50
  -5  15   1   31.00    4.00
  -4 -15   1   45.40    4.10
  -4  15   1   35.50    4.20
   4  15  -1   42.80    3.90
  -3 -15   1   42.10    3.90
  -3  15   1   38.60    4.10
   3  15  -1   39.70    3.90
   2 -15  -1   10.80    2.10
  -2 -15   1    7.80    1.90
   2  15  -1   10.40    2.30
  -2  15   1   10.00    2.30
  -1 -15   1    2.60    1.40
   1 -15  -1    1.70    1.20
   1  15  -1    1.70    1.80
  -1  15   1    1.50    1.70
   0 -15   1   21.30    2.80
   0  15  -1   23.60    3.50
   1 -15   1   10.00    2.00
  -1  15  -1   13.50    2.70
  -2 -15  -1   12.80    2.60
   2  15   1   10.70    2.20
  -3 -15  -1   37.90    3.90
   3 -15   1   56.09    3.70
   3  15   1   42.30    3.90
  -3  15  -1   52.69    4.60
  -4 -15  -1  310.97   16.40
   4  15   1  306.47   16.50
  -4  15  -1  307.67   17.00
  -5 -15  -1   75.09    5.30
   5  15   1   65.99    4.80
  -5  15  -1   58.19    5.50
   6 -15   1   16.20    3.30
  -6 -15  -1   18.00    3.70
   6  15   1   15.30    1.80
  -6  15  -1   17.90    3.20
   6  15   1   17.60    2.50
  -7 -15  -1    8.30    2.30
  -7  15  -1    6.10    2.40
   7  15   1    9.30    1.60
   7  15   1   13.40    2.20
   7  15   1    6.80    1.80
   8 -15   1   66.99    5.60
  -8 -15  -1   74.49    5.70
   8  15   1   67.59    4.10
   8  15   1   70.39    4.70
  -8  15  -1   64.39    5.80
   9 -15   1    3.00    2.20
  -9 -15  -1    5.30    2.20
   9  15   1    6.10    1.90
  -9  15  -1    4.50    2.30
   9  15   1    6.00    1.60
  10 -15   1   32.10    4.60
 -10 -15  -1   33.40    4.30
  10  15   1   33.90    2.30
 -10  15  -1   32.20    4.20
  10  15   1   31.60    3.00
  10  15   1   32.80    3.70
 -11 -15  -1   26.70    4.10
  11 -15   1   24.20    4.40
  11  15   1   32.00    2.70
  11  15   1   29.50    2.00
 -11  15  -1   24.10    4.00
  11  15   1   22.90    3.50
 -12 -15  -1   12.10    2.80
  12  15   1   19.80    2.20
  12  15   1   21.30    3.60
  12  15   1   16.50    3.90
 -12  15  -1   20.10    2.30
 -10 -16   1    1.40    2.30
  10 -16  -1   -0.70    2.10
 -10  16   1   -1.30    2.00
  10  16  -1    2.70    1.30
  10  16  -1    1.50    0.70
  -9 -16   1   24.50    4.10
   9 -16  -1   23.80    4.40
   9  16  -1   27.10    2.80
  -9  16   1   24.00    4.00
   9  16  -1   25.00    2.20
  -8 -16   1   12.30    2.80
   8 -16  -1   10.80    2.90
  -8  16   1    9.40    2.90
   8  16  -1   14.60    2.40
   8  16  -1   10.30    1.80
  -7 -16   1    9.60    2.50
  -7  16   1    6.40    2.50
   7  16  -1    8.30    1.70
   7  16  -1    8.90    1.90
  -6 -16   1    2.90    2.10
  -6  16   1   -0.90    1.70
   6  16  -1    2.40    1.50
  -5 -16   1    5.80    2.10
  -5  16   1    5.00    2.20
   5  16  -1    5.40    1.80
  -4 -16   1   48.50    4.30
   4  16  -1   42.10    4.00
  -4  16   1   39.60    4.50
  -3 -16   1   32.40    5.70
  -3  16   1   28.20    3.80
   3  16  -1   31.60    3.50
   2 -16  -1    1.60    1.20
  -2  16   1    1.10    2.00
   2  16  -1    5.10    1.90
  -1 -16   1  144.49    8.80
   1 -16  -1  154.38    8.60
   1  16  -1  134.79    9.10
  -1  16   1  160.28    9.40
   0 -16   1   71.39    5.00
   0 -16  -1   73.29    5.00
   0  16  -1   63.19    5.60
   0  16   1   66.59    5.60
   1 -16   1   84.59    5.90
  -1 -16  -1   98.09    6.10
  -1  16  -1   88.29    6.70
   1  16   1   93.09    6.50
   2 -16   1   12.00    2.30
  -2  16  -1    6.50    2.20
  -3 -16  -1   35.10    5.50
   3 -16   1   34.20    3.10
  -3  16  -1   27.10    4.00
   3  16   1   30.60    3.40
  -4 -16  -1    5.50    1.90
  -4  16  -1    3.40    2.20
   4  16   1    5.20    1.80
  -5 -16  -1   29.90    3.80
  -5  16  -1   30.40    4.00
   5  16   1   34.50    3.30
  -6 -16  -1   -0.80    1.80
   6  16   1    1.50    0.80
   6  16   1    1.50    1.40
  -6  16  -1    0.70    2.00
  -7 -16  -1   26.50    3.90
   7  16   1   30.50    2.50
   7  16   1   32.60    3.10
  -7  16  -1   32.70    4.20
  -8 -16  -1   44.50    4.70
   8 -16   1   43.40    5.00
   8  16   1   47.90    3.20
   8  16   1   49.50    3.90
  -8  16  -1   44.40    4.90
  -9 -16  -1  114.29    7.70
   9 -16   1  100.89    7.70
   9  16   1  111.29    6.70
   9  16   1  110.69    6.00
  -9  16  -1  102.69    7.80
  10 -16   1   -0.90    2.10
 -10 -16  -1    3.20    2.30
  10  16   1    1.30    0.70
 -10  16  -1    0.40    1.90
  10  16   1    2.30    1.30
  10  16   1    2.00    1.70
   9 -17  -1    9.90    2.90
   9  17  -1   10.90    2.00
   9  17  -1   13.50    1.80
  -9  17   1    7.10    3.00
  -8 -17   1   22.70    4.20
   8  17  -1   23.90    3.00
  -8  17   1   17.60    3.40
   8  17  -1   20.00    2.20
  -7 -17   1    1.80    2.30
   7  17  -1    5.10    1.70
   7  17  -1    1.80    1.00
  -7  17   1    4.20    2.30
  -6  17   1    4.00    2.30
   6  17  -1   10.60    2.10
  -5 -17   1   62.79    5.30
  -5  17   1   55.49    5.30
   5  17  -1   62.29    4.90
  -4 -17   1    2.70    1.90
   4  17  -1    2.80    1.80
  -4  17   1    0.20    2.00
  -3 -17   1    0.40    1.60
   3  17  -1    0.60    1.70
  -3  17   1   -0.80    1.90
  -2 -17   1   23.60    3.40
   2  17  -1   19.80    3.30
  -2  17   1   19.90    3.40
   1 -17  -1   16.20    2.70
   1  17  -1    9.90    2.70
  -1  17   1   12.00    2.80
   0 -17  -1   60.49    4.60
   0  17  -1   67.99    5.50
   0  17   1   52.39    5.00
   1 -17   1  134.79    7.90
  -1 -17  -1  129.79    7.90
   1  17   1  122.39    8.20
  -1  17  -1  128.19    8.60
   2 -17   1   13.10    2.50
  -2  17  -1    7.80    2.70
   2  17   1   10.20    2.50
  -3 -17  -1   39.80    4.00
  -3  17  -1   33.90    4.30
   3  17   1   43.80    4.10
  -4 -17  -1   -1.50    1.60
   4  17   1   -0.70    1.50
  -4  17  -1   -4.10    1.80
  -5 -17  -1   71.89    5.60
  -5  17  -1   68.49    6.00
   5  17   1   75.29    5.30
   5  17   1   70.09    4.40
  -6 -17  -1    4.40    2.10
  -6  17  -1   -0.40    2.00
   6  17   1    1.90    1.60
   6  17   1    2.50    0.90
   7  17   1   27.70    2.40
  -7  17  -1   24.30    3.90
   7  17   1   26.70    3.00
  -8 -17  -1    6.80    2.40
   8  17   1    6.70    1.70
  -8  17  -1    4.00    2.40
   8  17   1    8.70    1.70
   9 -17   1    5.90    2.40
  -9 -17  -1    6.60    2.40
   9  17   1    5.90    1.80
   9  17   1    5.50    1.10
  -7 -18   1   28.30    4.40
   7  18  -1   29.30    2.60
  -7  18   1   27.10    4.30
   7  18  -1   29.20    3.70
  -6 -18   1   22.30    4.00
   6  18  -1   21.90    2.30
   6  18  -1   23.60    3.20
  -5 -18   1    0.80    2.10
  -5  18   1    4.60    2.30
   5  18  -1    1.10    1.80
  -4 -18   1    1.30    1.90
   4  18  -1   -1.50    1.60
  -4  18   1   -2.20    1.80
  -3 -18   1   21.70    3.60
   3  18  -1   26.30    3.50
  -3  18   1   21.40    3.60
  -2  18   1    2.00    1.90
   1 -18  -1   93.29    5.80
  -1 -18   1   83.19    5.90
   1  18  -1   68.19    6.20
  -1  18   1   79.49    6.30
   0 -18  -1   49.90    4.20
   0 -18   1   44.40    4.30
   0  18  -1   42.10    4.70
   0  18   1   41.60    4.40
   1 -18   1    3.90    1.70
  -1 -18  -1    5.00    1.70
   1  18   1    3.80    1.90
  -1  18  -1    3.70    2.20
   2 -18   1   13.40    2.70
  -2 -18  -1   11.70    2.30
  -2  18  -1   10.60    2.80
   2  18   1    9.50    2.50
  -3 -18  -1   39.00    4.00
  -3  18  -1   29.60    4.40
   3  18   1   39.40    4.00
  -4 -18  -1    3.60    2.00
   4  18   1    0.80    1.50
  -4  18  -1    4.00    2.50
  -5 -18  -1   47.10    4.60
  -5  18  -1   41.40    5.30
   5  18   1   42.20    3.20
   5  18   1   41.90    4.00
  -6 -18  -1   10.60    2.60
   6  18   1   11.50    2.40
   6  18   1   12.10    1.90
  -7 -18  -1   -0.70    2.00
  -7  18  -1   -0.90    2.10
   7  18   1    0.10    0.90
  -5 -19   1   13.20    2.90
  -5  19   1   15.30    3.20
   5  19  -1   11.80    2.60
  -4 -19   1   22.30    3.90
   4  19  -1   18.00    3.10
  -4  19   1   13.60    3.00
  -3 -19   1   30.00    3.90
   3  19  -1   26.30    3.80
  -3  19   1   17.70    3.40
  -2 -19   1    1.50    1.90
   2  19  -1    0.00    2.00
  -2  19   1    6.30    2.40
  -1 -19   1    1.20    1.80
  -1  19   1   -0.10    1.80
   1  19  -1   -0.60    2.10
   0 -19   1    4.00    1.80
   0 -19  -1    3.30    1.70
   0  19  -1    3.70    2.30
   0  19   1    3.30    2.20
   1 -19   1   24.60    3.40
  -1 -19  -1   26.70    3.50
   1  19   1   22.90    3.70
  -1  19  -1   26.90    4.00
  -2 -19  -1    0.90    1.60
  -2  19  -1    1.50    2.00
   2  19   1   -0.40    1.90
  -3 -19  -1   -0.70    1.70
   3  19   1   -1.10    1.60
  -3  19  -1   -1.70    1.90
  -4 -19  -1   55.69    5.00
  -4  19  -1   50.09    5.30
   4  19   1   50.39    4.60
  -5 -19  -1    0.90    1.90
  -5  19  -1   -0.30    2.10
   5  19   1   -0.10    1.00
   5  19   1   -0.10    1.60
 -18   0   2   14.20    2.80
  18   0  -2   14.70    5.10
 -18   0   2   11.90    1.90
  18   0  -2    7.30    2.80
  17   0  -2    1.00    2.20
  17   0  -2    1.80    3.70
 -17   0   2   -0.20    1.60
  16   0  -2   25.00    4.20
  16   0  -2   23.30    5.50
  15   0  -2   12.30    3.90
  14   0  -2   12.40    2.50
  14   0  -2   15.30    4.10
 -14   0   2   10.90    2.10
 -14   0   2   10.60    1.50
  13   0  -2    8.70    3.20
  12   0  -2   60.89    6.70
  12   0  -2   57.29    5.20
 -12   0   2   75.89    3.90
 -12   0   2   73.69    4.50
  11   0  -2   -1.70    1.30
 -11   0   2   -0.40    0.50
  11   0  -2   -2.00    2.00
 -11   0   2   -0.50    0.80
  10   0  -2   79.29    6.20
  10   0  -2   88.99    5.30
 -10   0   2   68.99    4.10
 -10   0   2   72.39    4.60
   8   0  -2  182.68   10.90
   8   0  -2  189.88   10.00
  -8   0   2  187.68    9.40
  -8   0   2  192.28    9.80
   7   0  -2    0.90    0.40
   6   0  -2 1715.33   83.59
  -5   0   2    1.90    0.70
   4   0  -2  839.02   41.10
   4   0  -2  853.81   40.60
  -4   0   2  795.02   41.30
   4   0  -2  837.42   40.70
  -3   0   2    0.50    0.20
   3   0  -2    0.90    0.20
   3   0  -2    0.60    0.50
  -3   0   2    0.70    0.40
  -2   0   2  219.28   11.30
   2   0  -2  245.78   11.60
  -2   0   2  223.78   11.60
   2   0  -2  229.88   11.30
   1   0  -2    0.50    0.10
  -1   0   2    0.50    0.10
  -1   0   2    0.50    0.20
   1   0  -2    0.30    0.10
   0   0  -2  936.81   56.89
   1   0   2    0.40    0.30
  -1   0  -2    0.20    0.20
  -1   0  -2    0.60    0.10
   1   0   2    0.40    0.10
  -2   0  -2  426.66   21.40
   2   0   2  433.96   21.50
  -3   0  -2    0.20    0.50
   3   0   2   -0.30    0.50
  -3   0  -2    0.90    0.20
   3   0   2    0.10    0.20
   3   0   2    0.60    0.10
  -4   0  -2  444.96   21.10
   4   0   2  415.26   21.40
   4   0   2  432.26   21.10
  -4   0  -2  429.96   21.10
   4   0   2  443.96   22.00
   4   0   2  419.96   21.10
  -5   0  -2    0.70    0.30
   5   0   2    0.30    0.30
  -5   0  -2    1.70    1.10
   5   0   2    0.40    0.30
  -5   0  -2    0.50    0.30
   6   0   2  374.56   19.40
   6   0   2  382.86   19.00
  -6   0  -2  391.76   19.00
  -6   0  -2  378.36   19.00
   6   0   2  395.66   20.50
   6   0   2  386.96   18.80
   6   0   2  389.06   19.00
   7   0   2   59.59    5.00
   7   0   2   68.09    4.10
   8   0   2 1459.15   71.99
   8   0   2 1426.76   70.69
   8   0   2 1408.56   70.49
  -8   0  -2 1495.25   70.69
  -8   0  -2 1410.26   70.49
   8   0   2 1479.45   70.99
  -9   0  -2    2.10    0.60
   9   0   2    1.60    0.70
 -10   0  -2   24.90    1.60
  10   0   2   24.40    3.00
  10   0   2   23.70    1.50
  10   0   2   25.60    1.80
 -10   0  -2   23.20    2.20
  10   0   2   27.10    4.40
 -11   0  -2    0.70    0.40
  11   0   2    0.40    0.30
  11   0   2   -0.90    1.20
 -11   0  -2    0.10    0.60
  12   0   2  406.86   24.50
 -12   0  -2  425.06   20.80
  12   0   2  414.86   21.70
 -12   0  -2  436.46   21.30
  12   0   2  411.06   20.60
 -14   0  -2  258.37   13.20
  14   0   2  266.87   14.50
 -14   0  -2  263.07   13.90
  14   0   2  237.78   13.00
  14   0   2  281.47   16.70
  15   0   2    0.70    2.10
 -15   0  -2    0.50    1.10
  15   0   2    0.50    0.60
  15   0   2    2.70    3.30
 -15   0  -2    1.00    0.70
  16   0   2   82.59    9.20
 -16   0  -2   91.39    5.90
  16   0   2   87.09    6.80
 -16   0  -2   85.09    5.20
 -18   0  -2  148.49    9.70
 -18   0  -2  172.68   10.00
  18   0   2  162.38   10.70
  18   0   2  177.48   13.60
  18  -1  -2   -0.40    2.30
  18  -1  -2    1.60    4.10
 -18  -1   2    3.20    2.20
 -18  -1   2    2.20    1.20
  18   1  -2    1.20    3.80
 -18   1   2    1.90    1.00
  18   1  -2   -0.50    2.20
 -18   1   2    3.20    1.80
 -17  -1   2    3.80    1.30
 -17  -1   2    5.00    2.20
  17  -1  -2   11.60    4.20
  17  -1  -2    6.90    2.50
  17   1  -2    4.00    2.50
 -17   1   2    5.30    1.10
  17   1  -2    5.30    4.10
 -17   1   2    7.80    2.10
  16  -1  -2   62.49    8.20
 -16  -1   2   46.60    4.70
 -16  -1   2   53.99    3.70
  16  -1  -2   51.59    5.30
  16   1  -2   47.40    5.20
  16   1  -2   49.20    7.80
 -16   1   2   52.79    4.30
 -16   1   2   59.49    3.50
  15  -1  -2   59.39    5.00
  15  -1  -2   56.69    7.70
 -15  -1   2   45.50    3.30
 -15  -1   2   43.20    4.60
  15   1  -2   41.50    7.00
 -15   1   2   51.19    3.20
  15   1  -2   41.90    4.80
 -15   1   2   48.10    3.90
 -14  -1   2    1.30    0.80
  14  -1  -2    0.40    1.90
  14  -1  -2    3.80    3.20
 -14  -1   2    0.80    1.30
  14   1  -2    6.10    3.10
  14   1  -2    4.80    2.00
 -14   1   2    0.90    0.70
 -14   1   2    2.10    1.20
 -13  -1   2   10.60    1.40
  13  -1  -2    8.10    3.70
 -13  -1   2   10.10    1.90
  13  -1  -2    9.50    2.30
  13   1  -2    6.60    2.20
  13   1  -2    7.50    3.30
 -13   1   2   13.20    1.80
 -12  -1   2   47.20    3.60
 -12  -1   2   45.50    2.90
  12  -1  -2   34.10    6.80
  12  -1  -2   37.90    4.20
 -12   1   2   48.20    2.70
 -12   1   2   47.40    3.30
  12   1  -2   58.39    6.10
 -11  -1   2   11.80    1.30
 -11  -1   2   10.90    1.90
 -11   1   2   14.70    1.20
 -11   1   2   13.20    1.60
 -10  -1   2    7.60    0.90
  10  -1  -2    5.80    1.60
 -10  -1   2    7.50    1.40
  10  -1  -2    5.20    2.30
 -10   1   2    5.50    1.10
  10   1  -2    8.50    2.40
  10   1  -2    8.90    2.70
 -10   1   2    4.80    0.80
  -9  -1   2   17.90    1.70
  -9  -1   2   16.60    1.20
   9  -1  -2   14.10    2.30
   9  -1  -2   12.20    2.50
  -9   1   2   13.70    1.40
  -9   1   2   15.00    1.10
   8  -1  -2  352.56   17.80
   8  -1  -2  334.17   18.60
  -8  -1   2  351.76   17.30
  -8  -1   2  349.96   17.70
  -8   1   2  357.36   17.60
  -8   1   2  341.77   17.20
   8   1  -2  366.76   17.80
   8   1  -2  341.57   18.70
   7  -1  -2   17.90    1.90
   7  -1  -2   19.10    1.50
   7  -1  -2   15.80    2.70
  -7   1   2   17.20    1.10
   6  -1  -2  258.07   12.90
  -6  -1   2  239.08   12.50
   6  -1  -2  245.58   12.70
   6  -1  -2  271.37   14.10
  -6  -1   2  236.88   12.80
  -6   1   2  237.78   12.50
   6   1  -2  258.77   12.70
   6   1  -2  276.27   12.90
  -6   1   2  239.48   12.70
   6   1  -2  273.27   14.00
   5  -1  -2  664.43   33.50
  -5  -1   2  675.43   32.90
   5  -1  -2  712.63   33.00
  -5  -1   2  622.64   33.40
   5   1  -2  728.43   32.80
   5   1  -2  659.13   33.40
  -5   1   2  608.94   33.40
   5   1  -2  691.53   32.90
  -5   1   2  652.53   32.80
   4  -1  -2   18.90    1.90
   4  -1  -2   20.50    1.30
   4  -1  -2   18.50    1.40
  -4  -1   2   20.30    1.40
   4   1  -2   19.90    1.30
  -4   1   2   21.00    1.30
  -3  -1   2   35.80    2.10
   3  -1  -2   38.10    2.50
   3  -1  -2   36.80    2.00
  -3  -1   2   34.70    2.40
  -3   1   2   33.90    2.30
  -3   1   2   35.90    2.00
   3   1  -2   37.90    2.40
   3   1  -2   39.20    2.00
   2  -1  -2  307.97   13.80
  -2  -1   2  259.57   13.50
  -2  -1   2  262.27   13.60
   2  -1  -2  254.97   13.40
  -2   1   2  278.17   13.70
   2   1  -2  277.67   13.40
   2   1  -2  278.27   13.60
  -2   1   2  262.77   13.40
   1  -1  -2   53.69    2.90
  -1  -1   2   56.79    3.00
  -1  -1   2   59.79    3.00
   1   1  -2   61.19    3.00
   1   1  -2   57.09    3.00
   0  -1  -2 1038.10   63.39
   0   1  -2 1086.49   64.99
   0   1   2 1075.29   63.59
   1  -1   2  213.58   10.50
   1  -1   2  195.08   10.30
  -1  -1  -2  241.38   10.70
  -1  -1  -2  211.88   10.30
   1  -1   2  188.68   10.30
  -1   1  -2  200.08   10.50
  -1   1  -2  202.58   10.30
  -1   1  -2  209.88   10.30
   1   1   2  233.28   10.70
   1   1   2  203.78   10.30
   2  -1   2   53.69    2.80
  -2  -1  -2   56.59    3.20
  -2  -1  -2   52.79    2.80
  -2  -1  -2   50.39    2.80
   2  -1   2   52.59    3.20
   2   1   2   58.19    2.80
  -2   1  -2   50.39    3.10
  -2   1  -2   51.59    2.70
   2   1   2   59.99    3.30
   2   1   2   49.70    2.70
  -3  -1  -2  239.98   12.50
  -3  -1  -2  235.88   11.90
   3  -1   2  242.28   12.50
   3  -1   2  241.08   11.90
  -3  -1  -2  249.48   11.90
   3   1   2  259.07   12.60
   3   1   2  253.87   11.90
   3   1   2  231.08   11.80
  -3   1  -2  235.78   11.80
  -3   1  -2  226.48   11.80
  -3   1  -2  230.28   12.50
   4  -1   2 2137.99  106.49
   4   1   2 2213.68  106.59
   5  -1   2  567.14   29.00
  -5  -1  -2  553.54   28.00
   5  -1   2  588.84   28.40
   5  -1   2  576.84   28.10
  -5  -1  -2  590.24   28.20
  -5  -1  -2  520.25   29.00
   5   1   2  606.74   28.40
  -5   1  -2  558.24   28.00
  -5   1  -2  544.35   28.00
  -5   1  -2  549.25   29.10
   5   1   2  584.44   28.00
   5   1   2  654.03   29.20
   5   1   2  553.44   28.00
   6  -1   2   88.49    4.70
   6  -1   2   88.99    4.60
   6  -1   2   87.89    5.10
  -6  -1  -2   93.49    4.90
  -6  -1  -2   86.49    4.70
   6  -1   2   91.39    6.20
  -6   1  -2   89.39    4.70
   6   1   2   88.49    4.50
   6   1   2   95.59    5.20
   6   1   2   88.49    4.70
   6   1   2   98.99    6.30
   6   1   2   93.19    4.70
  -7  -1  -2  156.08    7.90
   7  -1   2  151.78    7.70
   7  -1   2  144.49    9.00
  -7  -1  -2  147.69    7.70
   7  -1   2  149.99    7.50
   7  -1   2  148.89    8.10
  -7  -1  -2  151.48    7.70
   7   1   2  158.68    8.20
   7   1   2  155.48    9.10
   7   1   2  146.49    7.50
   7   1   2  153.58    7.70
  -7   1  -2  155.78    7.70
  -7   1  -2  145.89    7.60
   7   1   2  150.98    7.60
   8  -1   2   46.70    3.30
  -8  -1  -2   41.10    2.30
   8  -1   2   48.80    4.50
   8  -1   2   33.00    2.20
  -8  -1  -2   41.80    2.70
  -8  -1  -2   38.80    2.30
  -8   1  -2   33.60    2.30
  -8   1  -2   35.50    2.10
   8   1   2   40.40    2.30
   8   1   2   42.40    2.10
  -8   1  -2   37.60    2.40
   8   1   2   41.10    2.40
  -9  -1  -2  208.08   11.10
  -9  -1  -2  216.98   11.50
   9  -1   2  237.68   13.00
  -9  -1  -2  235.88   11.60
   9  -1   2  241.18   11.90
   9  -1   2  208.38   10.90
  -9   1  -2  217.18   11.30
   9   1   2  210.48   11.10
   9   1   2  216.48   10.90
  -9   1  -2  220.68   11.20
  -9   1  -2  215.78   10.90
  10  -1   2  152.18   10.40
  10  -1   2  152.48    9.20
 -10  -1  -2  165.88    8.40
 -10  -1  -2  172.18    8.90
  10  -1   2  161.58    8.30
  10   1   2  173.18    8.40
  10   1   2  167.38    8.20
  10   1   2  165.08    9.20
  10   1   2  175.28   10.60
 -10   1  -2  165.38    8.30
 -11  -1  -2    2.00    0.90
  11  -1   2    0.30    1.30
  11  -1   2    1.00    2.00
  11  -1   2    1.50    0.40
  11   1   2   -1.40    2.10
 -11   1  -2    0.70    0.60
  11   1   2    0.80    0.30
  11   1   2   -0.10    1.30
  11   1   2   -0.10    0.50
  12  -1   2  254.67   14.50
  12  -1   2  241.88   13.30
 -12  -1  -2  276.37   14.20
 -12  -1  -2  266.47   13.50
  12   1   2  278.77   13.30
  12   1   2  288.37   14.60
  12   1   2  265.77   17.50
  12   1   2  276.57   13.60
 -12   1  -2  268.77   13.90
 -12   1  -2  269.17   13.40
 -13  -1  -2  167.58    9.50
  13  -1   2  212.78   12.90
  13  -1   2  190.88   10.80
 -13  -1  -2  172.48   10.30
  13  -1   2  154.58    9.30
  13   1   2  180.78    9.30
 -13   1  -2  186.38   10.00
  13   1   2  214.08   12.80
  13   1   2  199.28   10.80
 -13   1  -2  183.78    9.40
 -14  -1  -2  153.98    8.90
  14  -1   2  182.88   12.60
  14  -1   2  175.78   10.20
 -14  -1  -2  168.98    9.70
 -14   1  -2  162.68    8.70
 -14   1  -2  167.28    9.40
  14   1   2  187.98   10.20
  14   1   2  162.18    8.60
  15  -1   2    5.00    2.40
  15  -1   2    2.90    0.70
  15  -1   2    6.70    3.60
 -15  -1  -2    2.10    1.40
 -15  -1  -2    0.40    0.90
 -15   1  -2    2.90    1.20
  15   1   2    0.30    1.90
  15   1   2    1.70    0.60
  15   1   2    0.90    3.00
 -15   1  -2    2.30    0.70
  16  -1   2   60.89    8.00
 -16  -1  -2   63.09    4.80
 -16  -1  -2   56.19    3.80
  16  -1   2   56.99    5.50
 -16   1  -2   58.19    4.30
  16   1   2   62.39    5.60
  16   1   2   63.69    8.30
  17  -1   2   59.59    6.00
  17  -1   2   77.89    8.70
  17   1   2   63.69    6.00
 -18  -1  -2   39.60    4.70
 -18  -1  -2   30.60    3.20
  18  -1   2   48.30    5.50
  18  -1   2   50.79    8.70
 -18   1  -2   38.60    3.90
 -18  -2   2   12.40    3.00
 -18  -2   2   11.20    2.10
  18  -2  -2    6.50    2.70
  18  -2  -2    8.10    5.20
  18   2  -2   14.00    5.00
 -18   2   2   15.20    2.60
 -18   2   2   12.20    1.60
  18   2  -2    7.70    2.80
 -17  -2   2   19.90    3.50
  17  -2  -2   16.20    4.10
 -17  -2   2   14.20    2.20
  17  -2  -2   22.20    5.40
  17   2  -2   12.60    3.10
 -17   2   2   18.20    2.70
  17   2  -2   14.90    4.90
 -17   2   2   17.90    1.90
 -16  -2   2   37.20    4.50
  16  -2  -2   59.99    8.20
 -16  -2   2   39.50    3.40
  16  -2  -2   56.49    5.30
  16   2  -2   58.49    7.90
 -16   2   2   44.60    3.80
 -16   2   2   45.30    3.10
  16   2  -2   52.59    5.20
  15  -2  -2   68.79    6.30
 -15  -2   2   67.39    4.30
  15  -2  -2   85.29    8.60
 -15   2   2   59.49    3.80
 -15   2   2   58.59    4.50
  15   2  -2   69.59    5.70
  15   2  -2   71.89    8.30
 -14  -2   2   17.70    2.80
 -14  -2   2   20.20    2.10
 -14   2   2   21.70    2.40
  14   2  -2   27.70    5.70
 -14   2   2   21.90    1.80
  14   2  -2   24.60    3.70
 -13  -2   2    4.80    1.60
 -13  -2   2    6.20    1.20
  13  -2  -2    5.10    3.20
  13  -2  -2    5.50    1.90
  13   2  -2    3.10    1.80
 -13   2   2    2.60    1.00
 -13   2   2    4.70    0.90
  13   2  -2    2.60    2.70
 -12  -2   2   13.20    2.30
 -12  -2   2   14.70    2.70
  12   2  -2   13.90    3.60
 -12   2   2   20.10    1.90
  12   2  -2   12.80    2.40
  11  -2  -2  350.56   19.60
 -11  -2   2  363.06   17.60
 -11  -2   2  351.76   18.20
  11  -2  -2  335.67   18.20
  11   2  -2  331.87   19.40
  11   2  -2  342.07   18.20
 -11   2   2  363.26   17.80
 -11   2   2  359.36   17.30
 -10  -2   2   16.20    1.50
 -10  -2   2   16.70    2.00
   9  -2  -2  151.58    9.60
  -9  -2   2  151.08    7.80
  -9  -2   2  149.29    8.30
   9  -2  -2  154.48    8.50
   9   2  -2  156.38    9.30
  -9   2   2  146.99    7.70
  -9   2   2  147.59    8.00
   9   2  -2  160.08    8.40
  -8  -2   2  158.88    8.10
   8  -2  -2  169.98    8.70
   8  -2  -2  163.78    9.70
  -8  -2   2  157.48    8.60
  -8   2   2  157.18    8.30
   8   2  -2  159.58    8.60
  -8   2   2  153.48    8.00
   8   2  -2  154.88    9.50
  -7  -2   2  132.29    6.80
  -7  -2   2  134.19    7.30
   7  -2  -2  131.39    8.20
   7  -2  -2  133.39    7.30
   7   2  -2  138.19    7.20
   7   2  -2  134.29    8.00
  -7   2   2  132.19    7.00
   6  -2  -2   68.69    4.00
   6  -2  -2   67.89    4.80
  -6   2   2   64.99    3.70
  -5  -2   2  344.47   16.70
   5  -2  -2  350.26   17.60
  -5  -2   2  351.16   17.00
  -5  -2   2  333.27   17.60
   5   2  -2  346.07   16.90
  -5   2   2  299.67   17.40
   5   2  -2  340.57   17.40
   5   2  -2  356.56   16.80
  -5   2   2  321.77   16.80
  -4  -2   2   50.89    3.40
  -4  -2   2   52.19    3.00
   4  -2  -2   52.69    3.50
   4  -2  -2   51.89    3.00
  -4  -2   2   51.49    2.70
  -4   2   2   46.80    2.80
   4   2  -2   52.49    2.90
  -4   2   2   47.30    3.30
   4   2  -2   51.39    3.30
  -3  -2   2    0.30    0.50
   3  -2  -2    1.70    0.60
  -3  -2   2    1.40    0.40
   3   2  -2    0.30    0.50
   3   2  -2    2.30    0.30
  -3   2   2    1.30    0.30
  -3   2   2    0.50    0.50
  -2  -2   2    0.50    0.30
   2  -2  -2    1.20    0.60
  -2  -2   2    0.50    0.30
  -2   2   2    1.00    0.50
  -2   2   2    1.10    0.30
   2   2  -2    0.60    0.20
   2   2  -2    0.00    0.30
   1  -2  -2   29.40    1.60
  -1  -2   2   28.50    1.70
  -1   2   2   27.20    1.60
   1   2  -2   30.40    1.70
   0  -2   2    4.00    0.50
   0  -2  -2    4.00    0.40
   0   2   2    4.00    0.40
   0   2  -2    4.10    0.40
   1  -2   2    3.90    0.50
  -1  -2  -2    5.00    0.40
   1   2   2    5.10    0.40
  -1   2  -2    3.40    0.50
   1   2   2    6.00    0.80
  -2  -2  -2   53.49    3.30
  -2  -2  -2   60.09    2.90
   2  -2   2   48.90    3.10
  -2  -2  -2   46.10    2.70
   2   2   2   55.99    3.30
   2   2   2   49.10    2.70
  -2   2  -2   52.59    3.10
   2   2   2   54.79    2.90
   3  -2   2  731.93   37.40
  -3  -2  -2  810.72   37.10
  -3  -2  -2  718.53   37.00
  -3  -2  -2  726.63   37.60
   3   2   2  796.52   37.60
  -3   2  -2  755.32   37.00
   3   2   2  780.62   37.10
  -3   2  -2  737.83   37.50
  -4  -2  -2  240.68   12.10
  -4  -2  -2  229.48   13.00
   4  -2   2  246.88   12.30
   4  -2   2  243.78   12.80
  -4  -2  -2  244.08   12.30
   4   2   2  266.17   12.20
  -4   2  -2  233.38   12.00
   4   2   2  241.18   12.10
   4   2   2  258.57   13.00
   4   2   2  238.48   12.30
  -4   2  -2  247.38   12.10
  -5  -2  -2 1791.72   86.39
   5  -2   2 1766.02   87.19
  -5  -2  -2 1648.73   87.39
  -5  -2  -2 1893.81   86.59
  -5   2  -2 1709.33   87.39
   5   2   2 1839.92   87.39
   6  -2   2  232.18   13.20
  -6  -2  -2  253.67   12.30
  -6  -2  -2  220.88   12.10
   6  -2   2  247.68   12.40
   6  -2   2  243.38   11.90
   6   2   2  241.08   12.40
  -6   2  -2  247.88   12.00
  -6   2  -2  236.18   12.00
   6   2   2  252.07   13.30
   6   2   2  259.27   12.10
   6   2   2  229.28   11.90
   6   2   2  240.88   12.00
  -7  -2  -2    3.20    0.80
   7  -2   2    2.70    1.60
  -7  -2  -2    4.20    0.70
  -7  -2  -2    5.10    0.60
   7  -2   2    4.10    1.10
   7  -2   2    5.80    0.60
   7   2   2    4.70    1.00
  -7   2  -2    3.70    0.50
   7   2   2    4.60    0.50
   7   2   2    4.60    1.70
   7   2   2    3.90    0.60
   7   2   2    5.10    0.60
   8  -2   2  167.38    8.00
  -8  -2  -2  145.69    8.00
   8   2   2  146.49    7.90
  -8   2  -2  160.58    8.00
  -8   2  -2  168.58    7.80
   8   2   2  162.48    7.90
   8   2   2  160.38    8.00
  -8   2  -2  142.99    7.90
   9  -2   2 1217.28   63.29
  -9  -2  -2 1211.88   62.49
   9  -2   2 1256.77   62.29
   9  -2   2 1254.77   61.59
  -9  -2  -2 1301.97   61.69
   9   2   2 1297.17   63.39
   9   2   2 1314.87   62.29
   9   2   2 1217.58   61.79
  -9   2  -2 1304.07   61.79
  10  -2   2   31.10    3.30
 -10  -2  -2   34.10    2.20
  10  -2   2   34.40    2.10
 -10  -2  -2   32.70    2.70
  10  -2   2   34.10    4.60
  10   2   2   34.10    2.10
  10   2   2   41.10    4.80
  10   2   2   38.50    3.30
 -10   2  -2   35.50    2.00
  10   2   2   34.10    1.90
 -11  -2  -2   19.60    2.00
  11  -2   2   13.30    2.70
 -11  -2  -2   18.90    1.50
  11  -2   2   16.40    3.50
  11  -2   2   19.90    1.40
  11   2   2   18.10    1.40
  11   2   2   19.10    1.20
 -11   2  -2   19.80    1.60
  11   2   2   15.40    2.70
 -11   2  -2   19.90    1.30
  11   2   2   15.30    3.40
 -12  -2  -2   34.80    2.60
 -12  -2  -2   36.00    3.30
  12   2   2   40.10    2.10
 -12   2  -2   34.20    2.20
  12   2   2   42.50    2.40
 -12   2  -2   33.50    2.60
 -13  -2  -2   59.59    4.80
 -13  -2  -2   61.09    4.00
  13   2   2   70.09    3.80
  13   2   2   63.59    3.40
 -14  -2  -2   48.80    3.50
 -14  -2  -2   52.49    4.50
  14  -2   2   54.09    3.30
  14   2   2   51.99    3.00
 -14   2  -2   53.69    3.70
 -14   2  -2   53.49    3.20
 -15  -2  -2   52.29    4.20
  15  -2   2   38.20    6.90
  15  -2   2   40.90    2.90
  15  -2   2   42.20    7.00
 -15  -2  -2   46.90    3.50
 -15   2  -2   54.59    3.60
  15   2   2   47.70    4.90
  15   2   2   50.79    2.80
  15   2   2   47.20    6.90
 -15   2  -2   52.89    3.00
  16  -2   2   10.20    2.70
 -16  -2  -2   13.30    2.70
  16  -2   2   11.70    4.60
 -16  -2  -2   14.40    2.10
  16   2   2   16.00    4.00
  16   2   2   16.60    4.50
 -16   2  -2   14.20    2.10
  17  -2   2  253.27   17.00
 -17  -2  -2  232.08   13.60
  17  -2   2  234.08   13.90
 -17  -2  -2  214.98   12.40
  17   2   2  237.38   16.70
 -17   2  -2  240.88   12.20
 -17   2  -2  249.58   12.90
  17   2   2  240.08   13.90
  18  -2   2   29.10    4.80
  18  -2   2   33.20    7.30
  18   2   2   25.90    4.70
 -18   2  -2   23.30    3.10
  18   2   2   39.00    7.70
  18  -3  -2    0.60    4.40
 -18  -3   2    5.00    2.60
  18  -3  -2    0.00    2.40
  18   3  -2    2.00    3.80
 -18   3   2    5.90    1.80
 -17  -3   2   -0.50    2.10
 -17  -3   2   -1.50    1.20
  17  -3  -2    0.70    2.30
  17  -3  -2   -0.50    4.40
 -17   3   2    0.40    0.80
  17   3  -2   -0.10    2.30
  17   3  -2    4.50    3.70
 -17   3   2    0.20    1.30
  16  -3  -2   16.60    5.00
 -16  -3   2   11.10    3.00
 -16  -3   2   15.50    2.50
 -16   3   2   12.80    1.60
 -16   3   2   15.10    2.30
 -15  -3   2   54.29    5.10
 -15  -3   2   56.59    4.00
  15  -3  -2   76.59    8.40
 -15   3   2   58.69    4.20
 -15   3   2   58.39    3.50
  15   3  -2   70.39    7.90
 -14  -3   2  129.49    8.40
  14  -3  -2  138.89    8.60
 -14  -3   2  125.09    7.40
  14  -3  -2  156.28   11.30
 -14   3   2  134.99    7.00
  14   3  -2  133.59   10.20
  14   3  -2  130.99    8.40
 -14   3   2  136.49    7.60
  13  -3  -2    6.10    2.10
 -13  -3   2   11.10    1.60
  13  -3  -2    7.50    3.30
 -13  -3   2    9.60    2.10
  13   3  -2    9.80    3.30
  13   3  -2    6.60    2.20
 -13   3   2    9.50    1.50
 -13   3   2    7.90    1.00
 -12  -3   2   59.49    3.90
 -12  -3   2   62.39    4.80
 -12   3   2   66.29    4.00
 -12   3   2   63.09    3.50
  12   3  -2   70.29    5.20
 -11  -3   2    3.40    1.30
 -11   3   2    4.10    0.80
 -11   3   2    2.50    0.90
  10  -3  -2  461.55   23.70
  10  -3  -2  456.35   24.90
 -10  -3   2  471.25   23.80
 -10  -3   2  465.15   23.10
  10   3  -2  463.45   24.70
 -10   3   2  469.65   23.20
 -10   3   2  468.05   22.90
   9  -3  -2  144.09    8.00
  -9  -3   2  138.09    7.30
  -9  -3   2  136.69    7.90
   9  -3  -2  137.89    9.10
   9   3  -2  137.99    7.70
   9   3  -2  138.59    8.70
  -9   3   2  140.29    7.40
  -8  -3   2   24.70    2.20
  -8  -3   2   24.10    1.70
   8   3  -2   25.00    2.50
  -8   3   2   25.90    1.80
   8   3  -2   23.50    3.50
  -7  -3   2   90.99    4.70
   7  -3  -2   88.39    6.20
  -7  -3   2   88.49    5.20
   7  -3  -2   96.39    5.30
  -7   3   2   84.99    4.80
   7   3  -2   87.69    5.10
  -7   3   2   87.39    4.60
   7   3  -2   83.09    5.80
  -6  -3   2    4.00    0.90
  -6  -3   2    2.60    0.50
   6  -3  -2    3.60    1.50
  -6  -3   2    3.70    0.60
   6  -3  -2    2.80    0.90
   6   3  -2    2.90    0.80
  -6   3   2    3.30    0.70
   6   3  -2    1.30    1.20
   5  -3  -2  657.53   31.40
  -5  -3   2  673.73   31.20
  -5  -3   2  606.24   32.00
  -5  -3   2  656.03   31.50
   5  -3  -2  635.64   32.00
   5   3  -2  679.13   31.30
   5   3  -2  617.64   31.70
   5   3  -2  645.24   31.30
   5   3  -2  600.54   31.00
  -5   3   2  578.04   32.10
  -5   3   2  632.74   31.20
  -4  -3   2  202.08   11.50
  -4  -3   2  216.28   11.20
  -4  -3   2  217.78   10.80
   4   3  -2  206.38   11.30
  -4   3   2  213.38   10.90
  -4   3   2  260.07   11.60
   4   3  -2  230.48   11.00
   4   3  -2  196.58   10.80
  -3  -3   2  645.24   33.40
  -3  -3   2  698.73   33.00
   3  -3  -2  664.23   33.60
  -3  -3   2  695.13   33.30
   3   3  -2  660.03   33.00
  -3   3   2  617.54   33.40
   3   3  -2  676.33   33.30
   3   3  -2  733.83   33.20
  -2  -3   2   57.79    3.10
   2   3  -2   55.79    3.00
  -2   3   2   46.80    3.20
  -2   3   2   52.19    2.90
  -1  -3   2    1.50    0.40
  -1   3   2    1.00    0.40
   1   3  -2    1.50    0.40
   0   3  -2 1756.22   85.59
  -1  -3  -2 3849.31  209.18
   1  -3   2 3736.83  199.68
   1   3   2 3702.23  207.08
  -1   3  -2 3628.94  197.38
  -2  -3  -2  509.55   25.60
   2  -3   2  497.05   25.30
  -2  -3  -2  544.45   25.30
  -2  -3  -2  509.85   25.10
   2   3   2  512.65   25.10
  -2   3  -2  511.15   25.40
   2   3   2  516.25   25.30
   2   3   2  500.65   25.50
  -2   3  -2  501.95   25.20
   3  -3   2  313.77   16.20
  -3  -3  -2  298.97   16.40
  -3  -3  -2  333.57   16.00
  -3  -3  -2  317.27   15.80
  -3   3  -2  324.37   16.30
   3   3   2  311.67   15.90
   3   3   2  328.57   16.40
   3   3   2  324.57   15.80
   4  -3   2  342.77   16.40
   4  -3   2  342.27   17.10
  -4  -3  -2  313.87   16.50
   4  -3   2  334.27   16.60
  -4  -3  -2  335.27   16.80
  -4  -3  -2  310.77   17.40
   4   3   2  338.17   16.50
   4   3   2  335.57   17.30
   4   3   2  329.17   16.30
   4   3   2  338.37   16.70
   4   3   2  351.16   16.70
  -5  -3  -2    3.70    0.60
  -5  -3  -2    3.20    0.60
   5  -3   2    2.60    0.90
  -5  -3  -2    2.60    0.80
   5  -3   2    3.70    0.60
  -5  -3  -2    3.20    1.10
   5  -3   2    2.30    1.20
   5   3   2    4.10    1.30
   5   3   2    3.70    0.60
   5   3   2    2.70    0.50
  -5   3  -2    2.60    1.10
   5   3   2    2.50    0.40
  -5   3  -2    3.30    0.50
  -6  -3  -2    6.70    0.80
   6  -3   2    5.20    1.00
   6  -3   2    5.70    1.80
   6  -3   2    7.60    0.80
  -6  -3  -2    5.20    0.70
  -6  -3  -2    5.90    1.10
  -6   3  -2    5.40    0.60
   6   3   2    5.30    0.50
   6   3   2    8.40    1.50
   6   3   2    5.30    0.70
  -6   3  -2    5.60    0.60
   6   3   2    8.40    1.90
   6   3   2    5.90    0.70
  -7  -3  -2  285.57   14.00
   7  -3   2  269.17   15.20
  -7  -3  -2  261.27   14.00
   7  -3   2  282.47   14.40
  -7  -3  -2  284.07   14.40
   7  -3   2  296.77   14.00
   7   3   2  282.37   14.40
  -7   3  -2  276.17   13.90
   7   3   2  276.17   13.80
   7   3   2  292.07   14.10
   7   3   2  280.07   15.40
   7   3   2  274.67   13.90
  -7   3  -2  287.17   14.00
  -8  -3  -2  138.79    7.10
   8  -3   2  135.89    8.70
   8  -3   2  136.39    7.00
  -8  -3  -2  129.69    7.30
  -8  -3  -2  130.19    8.70
   8  -3   2  139.69    7.70
  -8   3  -2  139.49    7.00
   8   3   2  145.89    8.90
   8   3   2  130.19    6.80
   8   3   2  131.99    7.40
   8   3   2  145.79    7.80
   9  -3   2  287.67   15.00
  -9  -3  -2  310.97   15.20
   9  -3   2  290.47   15.70
   9  -3   2  278.57   16.80
  -9  -3  -2  312.07   15.80
   9   3   2  308.47   15.10
   9   3   2  305.57   14.90
   9   3   2  315.17   15.80
  -9   3  -2  309.77   15.20
   9   3   2  323.67   17.00
  -9   3  -2  296.27   15.00
  10  -3   2   15.00    2.70
  10  -3   2   20.60    1.40
 -10  -3  -2   21.00    1.60
 -10  -3  -2   22.10    2.20
  10  -3   2   18.80    4.00
 -10   3  -2   16.90    1.10
 -10   3  -2   17.80    1.50
  10   3   2   14.90    1.30
  10   3   2   14.50    1.10
  11  -3   2   57.09    4.90
 -11  -3  -2   70.29    3.90
  11  -3   2   51.09    6.30
 -11  -3  -2   71.29    4.50
  11  -3   2   62.39    3.60
 -11   3  -2   71.29    3.50
  11   3   2   70.99    3.70
  11   3   2   58.79    6.20
  11   3   2   62.19    4.80
  11   3   2   72.89    3.50
 -11   3  -2   71.29    3.90
 -12  -3  -2   33.90    2.50
  12  -3   2   27.10    2.20
  12  -3   2   36.40    3.90
 -12  -3  -2   38.30    3.30
 -12   3  -2   31.00    2.00
  12   3   2   35.70    2.20
 -12   3  -2   30.80    2.30
  12   3   2   36.50    3.90
  12   3   2   34.90    1.90
 -13  -3  -2  432.36   22.40
  13  -3   2  427.26   23.30
 -13  -3  -2  432.26   23.20
  13  -3   2  436.36   25.10
  13   3   2  470.55   22.00
  13   3   2  433.56   23.20
  13   3   2  468.95   22.20
  13   3   2  449.56   25.00
 -13   3  -2  462.65   22.50
 -13   3  -2  459.75   22.10
 -14  -3  -2   20.80    3.30
 -14  -3  -2   25.60    3.40
  14   3   2   24.20    2.00
  14   3   2   22.80    1.60
 -15  -3  -2   11.80    1.90
 -15  -3  -2   13.00    2.50
  15  -3   2    7.20    4.10
 -15   3  -2   10.60    1.20
 -15   3  -2   10.00    1.70
  15   3   2   12.50    1.10
  15   3   2    7.20    2.60
  15   3   2   10.90    3.90
  16  -3   2   16.90    4.90
 -16  -3  -2   10.10    2.00
 -16  -3  -2   10.60    2.70
  16   3   2    8.60    2.80
  16   3   2   11.50    4.40
 -17  -3  -2   35.50    3.50
 -17  -3  -2   39.70    5.60
 -17   3  -2   40.20    2.70
 -17   3  -2   41.90    3.50
  17  -4  -2   41.00    5.30
 -17  -4   2   42.20    3.60
 -17  -4   2   45.10    5.00
  17   4  -2   34.90    5.00
 -17   4   2   51.49    3.70
  17   4  -2   38.40    7.30
 -17   4   2   48.10    2.90
 -16   4   2   19.00    2.40
 -16   4   2   16.80    1.60
  16   4  -2   13.20    4.90
  15  -4  -2    1.90    2.30
 -15  -4   2    1.40    1.20
 -15  -4   2    0.30    1.90
  15  -4  -2    4.50    3.80
 -15   4   2    2.30    0.70
  15   4  -2    3.80    3.30
 -15   4   2    2.20    1.30
  15   4  -2    2.20    2.20
 -14  -4   2  113.99    6.70
  14  -4  -2  109.19    7.70
  14  -4  -2  114.69   10.20
  14   4  -2  128.59    7.70
 -14   4   2  109.49    6.10
  14   4  -2  140.89   10.00
 -14   4   2  105.09    6.60
  13  -4  -2   76.99    6.10
  13  -4  -2   79.79    8.30
 -13  -4   2  104.49    6.30
  13   4  -2   93.39    6.20
  13   4  -2  100.59    8.00
 -13   4   2   78.29    5.10
 -13   4   2   79.89    4.60
 -12  -4   2   88.89    5.10
  12  -4  -2   95.19    8.10
 -12  -4   2   86.59    6.10
  12  -4  -2   89.59    6.20
 -12   4   2   88.09    5.10
  12   4  -2   76.09    6.00
  12   4  -2   84.49    7.90
 -11  -4   2   17.60    2.30
  11  -4  -2   27.20    3.50
 -11  -4   2   20.20    2.80
  11  -4  -2   28.60    5.10
 -11   4   2   22.00    1.40
 -11   4   2   21.60    1.90
 -11   4   2   23.20    1.50
 -10  -4   2   42.50    2.90
 -10  -4   2   46.60    3.70
 -10   4   2   44.80    2.90
  10   4  -2   53.09    5.00
 -10   4   2   43.30    2.50
   9  -4  -2   62.89    4.30
   9  -4  -2   56.39    5.40
  -9  -4   2   57.39    3.40
  -9  -4   2   57.89    4.10
   9   4  -2   51.99    2.80
  -9   4   2   55.79    3.30
  -9   4   2   53.49    3.00
   9   4  -2   54.89    4.90
   9   4  -2   53.69    3.90
  -8  -4   2    4.20    1.00
   8   4  -2    5.30    0.60
  -8   4   2    8.10    0.80
   8   4  -2    7.40    1.40
  -8   4   2    7.70    1.00
   8   4  -2    4.90    0.70
   8   4  -2    8.70    2.10
   7  -4  -2  132.29    8.80
   7  -4  -2  132.49    7.90
  -7   4   2  133.89    7.50
   7   4  -2  141.79    7.30
   7   4  -2  178.68    8.80
   7   4  -2  152.78    7.30
  -6  -4   2 1399.16   67.59
  -6  -4   2 1404.96   67.09
   6  -4  -2 1342.47   68.19
   6  -4  -2 1369.26   67.39
   6   4  -2 1326.57   66.89
   6   4  -2 1426.16   67.19
   6   4  -2 1350.46   67.79
   5  -4  -2  408.46   21.00
  -5  -4   2  365.76   20.40
  -5  -4   2  396.86   20.10
   5  -4  -2  383.46   19.80
  -5  -4   2  400.76   19.60
   5   4  -2  434.76   20.30
   5   4  -2  410.16   19.70
   5   4  -2  365.76   19.50
  -4  -4   2    5.00    0.80
  -4  -4   2    7.40    1.40
  -4  -4   2    4.10    0.90
   4   4  -2    4.30    0.70
   4   4  -2    5.70    1.20
   4   4  -2    4.60    0.70
  -3  -4   2   26.80    2.10
  -3  -4   2   25.50    1.90
   3  -4  -2   23.30    2.40
  -3  -4   2   26.20    1.60
   3  -4  -2   22.40    1.80
   3   4  -2   25.50    1.70
   3   4  -2   23.90    1.60
  -2  -4   2  412.46   20.40
  -2  -4   2  418.56   20.00
  -2   4   2  384.16   20.40
  -2   4   2  409.66   20.10
  -1  -4   2  250.77   13.20
   1  -4  -2  281.37   13.00
  -1   4   2  252.37   13.00
   1   4  -2  252.57   13.10
   0  -4  -2 3539.15  200.58
   0   4   2 3552.84  199.08
   0   4  -2 3715.73  202.78
  -1  -4  -2    8.30    1.00
   1   4   2    8.80    1.00
   1   4   2    8.10    1.10
  -2  -4  -2  268.87   13.10
   2  -4   2  267.87   13.00
  -2   4  -2  237.48   13.00
   2   4   2  261.37   13.40
   2   4   2  240.78   13.10
  -2   4  -2  264.07   13.10
   2   4   2  265.87   12.90
  -3  -4  -2  122.39    6.40
   3  -4   2  130.39    6.90
  -3  -4  -2  123.89    6.80
  -3  -4  -2  126.99    6.70
   3  -4   2  122.99    6.40
  -3  -4  -2  134.59    7.30
   3   4   2  132.29    7.20
   3   4   2  122.89    6.90
   3   4   2  120.19    6.30
   3   4   2  130.69    6.50
  -3   4  -2  123.69    6.90
   4  -4   2  159.88    8.00
   4  -4   2  163.48    8.70
  -4  -4  -2  140.09    8.90
  -4  -4  -2  160.08    8.50
  -4  -4  -2  157.28    8.10
   4  -4   2  158.68    8.10
  -4  -4  -2  160.98    8.00
   4   4   2  148.29    8.90
   4   4   2  156.78    7.80
   4   4   2  157.78    8.30
   4   4   2  166.58    8.30
  -4   4  -2  165.08    8.80
   4   4   2  164.48    8.00
  -5  -4  -2  382.96   22.20
  -5  -4  -2  430.86   21.20
  -5  -4  -2  426.66   21.70
   5  -4   2  489.15   21.30
  -5  -4  -2  398.46   21.30
   5  -4   2  467.95   22.10
   5   4   2  417.86   21.60
   5   4   2  444.56   21.40
  -5   4  -2  435.86   22.20
   5   4   2  423.36   21.20
   5   4   2  430.06   22.20
   5   4   2  408.86   21.00
  -6  -4  -2   30.60    2.50
  -6  -4  -2   29.20    2.00
  -6  -4  -2   29.80    2.10
   6  -4   2   30.50    2.30
   6  -4   2   31.20    1.90
   6  -4   2   27.60    3.20
  -6   4  -2   30.30    2.00
   6   4   2   34.50    2.60
   6   4   2   37.70    3.50
   6   4   2   29.40    1.90
   6   4   2   32.20    2.10
   7  -4   2   11.60    1.80
   7  -4   2   12.10    1.10
   7  -4   2    8.20    2.10
  -7   4  -2    7.10    0.90
   7   4   2   10.80    1.10
   7   4   2    9.10    0.70
   8  -4   2  523.45   27.80
   8  -4   2  509.05   26.20
  -8  -4  -2  534.25   27.00
   8  -4   2  558.24   26.90
  -8  -4  -2  544.25   26.40
   8   4   2  540.55   27.90
   8   4   2  524.25   26.10
   8   4   2  543.45   26.30
  -8   4  -2  516.75   26.30
   8   4   2  545.65   26.90
  -9  -4  -2  246.28   12.20
   9  -4   2  237.18   13.90
   9  -4   2  222.98   12.00
  -9  -4  -2  240.18   12.80
   9  -4   2  247.68   12.80
   9   4   2  250.77   13.90
   9   4   2  235.18   12.00
   9   4   2  227.18   11.80
   9   4   2  253.57   12.80
 -10  -4  -2    6.90    1.60
 -10  -4  -2    6.70    1.20
  10  -4   2    4.80    1.60
  10  -4   2    5.70    2.50
  10   4   2    5.80    1.50
  10   4   2    5.10    0.60
  10   4   2    5.80    2.40
 -10   4  -2    5.20    0.90
  10   4   2    6.00    0.90
 -10   4  -2    5.60    0.60
 -11  -4  -2   14.00    1.50
  11  -4   2   10.60    1.40
 -11  -4  -2   18.10    2.20
  11  -4   2   10.60    3.20
  11  -4   2    9.20    2.10
 -11   4  -2   12.20    0.90
  11   4   2   11.00    3.10
  11   4   2   12.30    1.20
  11   4   2   13.30    0.90
 -11   4  -2   12.40    1.30
  11   4   2   12.40    2.60
 -12  -4  -2  116.39    6.10
 -12  -4  -2  113.09    7.00
  12  -4   2  101.49    7.00
  12  -4   2  101.99    9.00
 -12   4  -2  106.49    6.00
  12   4   2  116.79    5.60
  12   4   2  112.99    5.80
 -12   4  -2  105.19    5.60
  12   4   2  110.59    7.00
  13   4   2   23.00    1.70
  13   4   2   22.10    1.50
  14  -4   2  117.39    8.00
  14  -4   2  121.59   10.50
 -14  -4  -2  109.69    6.60
 -14  -4  -2  106.09    7.60
  14   4   2  120.99    6.00
  14   4   2  119.29    6.30
 -14   4  -2  125.79    6.60
  14   4   2  111.89    7.70
  14   4   2  126.99    9.90
 -14   4  -2  121.89    6.10
 -15  -4  -2    3.00    1.10
  15  -4   2    1.80    3.90
 -15  -4  -2    2.00    1.80
  15  -4   2    0.40    2.40
 -15   4  -2    4.20    0.90
 -15   4  -2    3.80    1.10
  15   4   2    2.80    0.50
  15   4   2    0.00    3.20
  15   4   2   -0.30    3.10
  16  -4   2    5.40    2.40
  16  -4   2    8.90    4.40
 -16  -4  -2    6.80    2.50
 -16  -4  -2    6.40    1.50
 -16   4  -2    7.80    1.40
  16   4   2    5.10    4.00
 -16   4  -2    6.80    1.50
  16   4   2    4.00    2.40
  16   4   2    7.90    1.00
 -17  -4  -2   30.60    3.30
  17  -4   2   44.30    5.10
 -17  -4  -2   34.00    4.60
  17   4   2   43.90    5.10
 -17   4  -2   41.80    3.30
 -17   4  -2   37.30    2.50
  17   4   2   54.29    8.80
  17  -5  -2    8.00    5.10
 -17  -5   2   10.50    3.00
 -17  -5   2    7.40    1.80
  17  -5  -2    5.60    2.70
 -17   5   2    7.60    1.20
 -17   5   2   10.40    2.00
  17   5  -2    8.30    4.00
  17   5  -2    5.00    2.60
  16  -5  -2   32.30    4.70
 -16  -5   2   28.00    3.10
 -16  -5   2   25.10    4.30
  16  -5  -2   38.90    7.80
  16   5  -2   29.50    5.70
  16   5  -2   28.10    4.60
 -16   5   2   32.90    2.80
 -16   5   2   32.00    2.20
 -15  -5   2    0.80    1.20
 -15  -5   2    0.90    2.10
  15  -5  -2    6.90    4.00
  15  -5  -2    3.50    2.30
 -15   5   2    0.30    0.60
 -15   5   2   -0.20    1.10
  15   5  -2    0.00    3.20
  15   5  -2    1.50    2.20
 -14  -5   2   31.50    4.00
  14  -5  -2   33.30    4.50
 -14  -5   2   29.60    2.90
  14  -5  -2   40.80    7.30
 -14   5   2   27.60    2.00
  14   5  -2   43.20    6.40
  14   5  -2   37.60    4.20
 -14   5   2   29.30    2.60
 -13  -5   2  171.98    9.50
  13  -5  -2  169.78   12.50
  13  -5  -2  164.38   10.40
 -13  -5   2  176.08   10.60
  13   5  -2  185.88   10.30
 -13   5   2  175.98    9.40
 -13   5   2  182.18    9.00
  13   5  -2  181.28   12.00
  12  -5  -2    8.20    3.50
 -12  -5   2    7.10    1.40
 -12  -5   2    7.10    2.10
  12  -5  -2    7.50    2.10
  12   5  -2    1.90    3.10
 -12   5   2    7.70    1.40
 -12   5   2    8.70    1.00
  12   5  -2    3.70    2.10
 -11  -5   2  140.79    8.80
  11  -5  -2  156.78   10.60
  11  -5  -2  152.48    8.80
 -11  -5   2  147.99    7.90
  11   5  -2  136.39    9.90
  11   5  -2  142.29    8.50
 -11   5   2  145.59    7.80
 -10  -5   2  299.07   15.50
  10  -5  -2  294.27   17.30
  10  -5  -2  296.47   15.90
 -10  -5   2  298.77   16.10
  10   5  -2  297.27   16.80
 -10   5   2  297.37   15.20
  10   5  -2  311.37   14.90
  -9  -5   2  216.08   11.00
   9  -5  -2  215.48   12.80
  -9  -5   2  213.48   11.80
  -9   5   2  203.28   10.90
   9   5  -2  216.68   10.70
   9   5  -2  212.48   11.30
   9   5  -2  213.68   12.40
   9   5  -2  212.48   10.50
   8  -5  -2   88.49    7.20
  -8  -5   2  102.79    5.50
   8  -5  -2   93.09    6.00
  -8  -5   2   99.79    6.10
   8   5  -2  100.79    5.00
  -8   5   2  107.19    5.40
   8   5  -2  106.49    5.20
   8   5  -2   90.09    6.60
   8   5  -2   97.29    5.70
   7  -5  -2  384.16   19.70
  -7  -5   2  403.66   20.10
  -7  -5   2  400.56   19.40
   7  -5  -2  359.46   20.70
   7   5  -2  398.86   19.60
   7   5  -2  378.86   20.30
  -7   5   2  395.36   19.40
   7   5  -2  378.76   19.00
   7   5  -2  395.76   19.20
  -6  -5   2  118.09    8.20
   6  -5  -2  133.49    8.30
   6  -5  -2  139.39    7.20
  -6  -5   2  132.59    6.80
  -6  -5   2  126.29    7.40
   6   5  -2  139.19    7.70
   6   5  -2  114.09    6.40
   6   5  -2  131.59    6.90
   6   5  -2  126.99    6.60
  -5  -5   2  278.27   13.50
   5  -5  -2  272.77   13.70
   5  -5  -2  284.17   15.00
  -5  -5   2  241.08   14.20
  -5  -5   2  267.67   14.00
   5   5  -2  266.97   13.50
   5   5  -2  262.47   14.00
   5   5  -2  265.17   13.40
  -4  -5   2  199.38   11.30
  -4  -5   2  220.68   11.40
   4  -5  -2  219.28   11.80
  -4  -5   2  220.18   10.80
   4   5  -2  222.78   11.20
  -4   5   2  191.08   11.30
   4   5  -2  220.38   10.80
  -3  -5   2  142.29    7.00
   3  -5  -2  129.09    7.10
  -3   5   2  134.39    7.50
   3   5  -2  130.69    7.10
   3   5  -2  143.59    7.30
  -2  -5   2  121.89    6.10
   2  -5  -2  110.99    6.30
  -2  -5   2  118.69    6.60
   2   5  -2  115.49    6.30
  -2   5   2  121.19    6.60
  -2   5   2  113.99    6.20
  -1  -5   2  961.20   48.50
  -1  -5   2  963.50   48.10
  -1   5   2 1046.50   48.30
   1   5  -2  967.60   48.40
   0  -5   2   17.00    1.30
   0  -5   2   21.30    1.80
   0   5  -2   19.00    1.60
   0   5   2   16.10    1.50
  -1  -5  -2  580.34   29.30
   1  -5   2  563.24   29.30
  -1  -5  -2  589.94   29.50
  -1   5  -2  644.14   29.90
   1   5   2  569.34   29.70
   1   5   2  638.14   29.50
  -2  -5  -2  157.48    8.40
  -2  -5  -2  159.48    8.20
   2  -5   2  157.38    8.20
   2   5   2  162.78    8.60
   2   5   2  171.58    8.40
   2   5   2  166.68    8.90
   3  -5   2   77.69    4.60
   3  -5   2   76.39    4.00
  -3   5  -2   74.49    4.50
  -4  -5  -2  647.94   33.50
  -4  -5  -2  596.74   33.50
  -4  -5  -2  669.83   33.20
   4  -5   2  715.63   33.10
  -4  -5  -2  665.03   34.00
   4  -5   2  693.83   33.60
   4   5   2  672.33   33.20
  -4   5  -2  662.93   33.70
   4   5   2  678.33   33.30
   4   5   2  682.23   33.90
   4   5   2  700.83   33.10
   4   5   2  687.13   33.10
  -5  -5  -2   81.59    4.30
   5   5   2   76.89    3.90
   5   5   2   76.49    5.50
   5   5   2   74.79    4.50
   5   5   2   73.79    4.30
  -6  -5  -2   85.59    4.60
   6  -5   2   80.79    5.70
  -6  -5  -2   84.99    5.20
   6  -5   2   84.49    4.80
   6   5   2   83.39    4.30
   6   5   2   87.49    4.50
   6   5   2   80.99    4.90
   6   5   2   80.79    5.80
  -7  -5  -2  243.38   12.10
   7  -5   2  241.08   12.30
   7  -5   2  221.98   11.90
   7  -5   2  224.98   13.20
  -7  -5  -2  242.08   12.70
   7   5   2  242.38   12.40
   7   5   2  245.08   11.90
  -7   5  -2  238.88   11.90
   7   5   2  236.28   11.70
   7   5   2  237.28   13.50
   8  -5   2  105.39    5.60
   8  -5   2  104.99    7.30
   8  -5   2  105.49    6.20
  -8  -5  -2  106.69    5.80
  -8  -5  -2  102.09    6.50
   8   5   2  111.69    7.50
   8   5   2  115.29    6.40
   8   5   2  103.59    5.60
  -8   5  -2  110.69    5.80
   8   5   2  100.69    5.40
   9  -5   2   80.69    6.00
  -9  -5  -2   64.19    4.70
  -9  -5  -2   65.09    4.00
   9   5   2   69.99    5.80
   9   5   2   72.29    4.70
   9   5   2   61.29    3.50
   9   5   2   63.79    3.70
  -9   5  -2   66.09    3.80
  10  -5   2    5.30    1.80
 -10  -5  -2    7.00    1.40
  10  -5   2    5.40    2.70
 -10  -5  -2    9.60    2.00
  10   5   2    7.60    0.70
 -10   5  -2    8.00    1.00
  10   5   2    5.70    1.70
  10   5   2    5.10    2.70
  10   5   2    9.20    1.00
  11  -5   2   99.39    6.80
 -11  -5  -2  110.69    6.00
  11  -5   2   90.09    8.30
 -11  -5  -2  114.39    6.90
  11   5   2  108.99    6.70
  11   5   2  105.49    5.40
  11   5   2  109.19    8.30
 -11   5  -2  108.39    5.80
  11   5   2  109.49    5.70
  12  -5   2  104.39    7.40
 -12  -5  -2  112.29    7.30
 -12  -5  -2  110.09    6.50
  12  -5   2  112.49    9.30
 -12   5  -2  113.69    6.20
 -12   5  -2  113.19    5.80
  12   5   2  115.79    5.80
  12   5   2  125.69    7.30
  12   5   2  119.19    6.00
 -13  -5  -2   43.70    4.60
 -13  -5  -2   41.70    3.50
  13   5   2   60.29    6.70
 -13   5  -2   48.30    3.10
  13   5   2   52.89    4.70
 -13   5  -2   47.30    2.70
  13   5   2   50.79    2.90
  13   5   2   48.40    2.60
  14  -5   2   25.00    4.40
 -14  -5  -2   36.10    2.80
  14  -5   2   28.60    5.50
 -14   5  -2   30.10    2.40
  14   5   2   32.90    1.90
 -14   5  -2   28.50    1.90
  14   5   2   33.60    2.20
  14   5   2   37.20    4.20
 -15  -5  -2   19.60    2.30
  15  -5   2   12.40    5.10
 -15  -5  -2   18.60    3.20
  15   5   2   19.60    1.70
 -15   5  -2   21.20    2.00
  15   5   2   12.40    4.10
  15   5   2   19.80    1.30
 -15   5  -2   22.00    1.70
 -16  -5  -2   39.10    3.40
  16  -5   2   32.70    4.90
  16  -5   2   30.60    6.40
 -16  -5  -2   39.70    4.90
 -16   5  -2   43.30    2.50
  16   5   2   37.70    6.80
  16   5   2   39.30    4.70
 -16   5  -2   45.70    3.10
  17  -5   2    4.80    2.50
 -17  -5  -2    2.00    2.60
  17  -5   2    7.10    7.20
  17   5   2    6.40    2.50
 -17   5  -2    3.40    1.20
 -17   5  -2    6.20    1.20
  17   5   2    7.10    5.10
 -17  -6   2   17.20    2.90
  17  -6  -2   11.40    5.20
 -17  -6   2   21.00    4.20
 -17   6   2   22.40    2.30
 -17   6   2   20.10    1.60
  17   6  -2   12.50    3.20
  17   6  -2   14.10    4.80
 -16  -6   2   25.60    4.40
 -16  -6   2   24.00    3.00
  16  -6  -2   30.70    4.90
  16  -6  -2   27.00    5.80
  16   6  -2   24.00    4.40
 -16   6   2   29.00    2.60
 -16   6   2   27.70    2.00
  16   6  -2   26.40    5.40
  15  -6  -2  179.58   11.00
 -15  -6   2  165.28   11.10
  15  -6  -2  182.78   13.80
 -15  -6   2  166.68    9.70
 -15   6   2  179.08    8.90
  15   6  -2  172.08   10.50
  15   6  -2  164.78   12.30
 -15   6   2  180.38    9.50
  14  -6  -2   19.10    4.10
  14  -6  -2   13.00    4.40
 -14  -6   2   10.90    2.30
  14   6  -2    6.00    3.50
  14   6  -2   15.10    3.70
 -13  -6   2    9.00    2.60
 -13  -6   2   12.70    2.10
  13  -6  -2   16.90    3.70
  13  -6  -2   14.10    3.90
  13   6  -2    9.50    2.30
 -13   6   2    9.10    1.60
  13   6  -2   14.70    3.60
 -13   6   2   11.00    1.10
 -12  -6   2   22.20    3.30
 -12  -6   2   17.20    2.20
  12   6  -2   21.50    3.40
  12   6  -2   17.30    3.60
 -11  -6   2   63.89    4.40
  11  -6  -2   68.89    5.40
  11  -6  -2   74.89    7.30
 -11  -6   2   65.99    5.50
  11   6  -2   69.79    6.60
 -11   6   2   66.19    4.10
  11   6  -2   74.09    3.80
  11   6  -2   71.69    3.60
  11   6  -2   66.09    5.00
  10   6  -2   17.20    1.10
 -10   6   2   12.50    1.60
  10   6  -2   18.40    1.40
   9  -6  -2  618.94   31.20
   9  -6  -2  616.44   32.50
  -9  -6   2  618.24   30.80
  -9  -6   2  609.04   31.60
   9   6  -2  633.44   30.40
   9   6  -2  616.94   30.20
   9   6  -2  609.04   30.90
  -9   6   2  640.54   30.70
   9   6  -2  602.24   31.80
  -8  -6   2  219.78   11.20
   8  -6  -2  206.18   12.90
  -8  -6   2  214.28   12.00
   8  -6  -2  218.18   11.60
  -8   6   2  228.18   11.10
   8   6  -2  215.88   11.30
   8   6  -2  218.58   10.90
   8   6  -2  202.08   12.20
   8   6  -2  212.88   10.60
  -7  -6   2  124.69    7.50
  -7  -6   2  129.59    6.80
   7  -6  -2  126.59    8.60
   7  -6  -2  125.59    7.20
   7   6  -2  132.39    6.90
   7   6  -2  117.99    6.70
   7   6  -2  119.09    6.30
   7   6  -2  124.59    7.70
  -7   6   2  130.99    6.70
   6  -6  -2   90.79    7.60
   6  -6  -2  107.59    6.30
  -6  -6   2  116.89    5.90
  -6  -6   2  116.59    6.70
  -6  -6   2   93.89    7.30
   6   6  -2  112.29    6.80
   6   6  -2  113.99    6.00
  -5  -6   2  896.71   44.10
   5  -6  -2  877.11   43.60
  -5  -6   2  911.91   43.40
  -5  -6   2  813.72   44.10
   5  -6  -2  881.41   44.50
   5   6  -2  891.81   43.90
   5   6  -2  931.71   43.40
   5   6  -2  867.21   43.60
  -4  -6   2  354.66   18.20
   4  -6  -2  336.17   17.70
  -4  -6   2  363.26   17.60
   4   6  -2  350.46   17.60
   3  -6  -2  729.03   36.70
  -3  -6   2  767.92   36.60
  -3  -6   2  765.82   37.30
   3   6  -2  778.42   36.80
  -3   6   2  684.73   37.00
  -2  -6   2    1.60    0.60
  -2  -6   2    0.30    0.90
   2   6  -2    1.80    0.80
  -1  -6   2   13.00    1.20
   1  -6  -2   12.40    1.10
   1   6  -2   11.70    1.50
   0  -6  -2   48.30    2.90
   0  -6   2   50.39    3.50
   0  -6   2   54.39    3.40
   0   6  -2   51.39    3.30
   0   6   2   51.79    3.60
  -1  -6  -2   10.30    1.10
   1   6   2   14.70    1.50
   1   6   2   11.70    1.60
  -2  -6  -2    3.50    0.70
   2  -6   2    2.30    0.60
   2   6   2    3.70    1.30
  -2   6  -2    2.50    1.10
  -3  -6  -2 1387.86   69.79
   3  -6   2 1457.65   69.59
  -3  -6  -2 1413.36   69.19
  -3   6  -2 1379.66   69.59
  -3   6  -2 1401.16   69.59
   3   6   2 1490.85   69.29
   3   6   2 1392.56   69.79
   4  -6   2    4.90    0.90
  -4  -6  -2    5.60    1.20
  -4  -6  -2    5.30    1.60
  -4  -6  -2    5.40    1.40
   4   6   2    5.30    0.90
   4   6   2    6.70    1.40
   4   6   2    4.70    0.60
   4   6   2    6.00    1.60
  -5  -6  -2   31.60    2.80
   5  -6   2   23.90    2.20
  -5  -6  -2   31.00    2.00
   5  -6   2   23.40    3.00
   5   6   2   24.60    1.60
   5   6   2   30.50    4.10
   5   6   2   27.40    1.90
   6  -6   2  195.88   10.60
   6  -6   2  194.48   11.40
  -6  -6  -2  206.78   10.40
  -6  -6  -2  212.08   11.20
   6   6   2  204.88   10.30
   6   6   2  199.08   10.00
   6   6   2  203.98   10.70
  -7  -6  -2  163.58    9.20
  -7  -6  -2  162.88    8.50
   7  -6   2  156.98    9.70
   7  -6   2  161.18    8.70
   7   6   2  160.28    9.90
   7   6   2  152.58    8.80
   7   6   2  165.58    8.30
   7   6   2  163.18    8.00
   8  -6   2   24.50    4.20
   8  -6   2   24.00    2.90
   8   6   2   32.50    2.00
  -8   6  -2   25.10    1.90
   8   6   2   33.30    1.70
  -9  -6  -2  120.89    6.50
   9  -6   2  116.19    8.40
   9  -6   2  110.39    8.30
  -9  -6  -2  118.69    7.30
   9   6   2  113.49    6.90
  -9   6  -2  123.79    6.30
   9   6   2  121.19    6.20
   9   6   2  114.99    8.10
   9   6   2  118.99    6.00
 -10  -6  -2   -0.50    0.70
 -10  -6  -2   -0.10    1.40
  10   6   2   -1.90    2.00
 -10   6  -2    0.20    0.50
  10   6   2    0.00    0.30
  10   6   2    0.10    0.50
  11  -6   2   -2.30    2.70
  11  -6   2   -0.30    1.70
 -11  -6  -2    5.10    1.90
  11   6   2    4.90    2.80
  11   6   2    3.40    0.80
  11   6   2    4.30    1.80
 -11   6  -2    3.00    0.80
  11   6   2    2.10    0.40
  12  -6   2   25.60    4.80
  12   6   2   31.70    2.10
  12   6   2   30.00    1.70
 -12   6  -2   24.60    2.10
  13  -6   2   10.70    3.80
  13  -6   2    6.40    2.30
 -13  -6  -2    2.40    1.40
 -13  -6  -2    2.10    2.30
 -13   6  -2    3.50    0.70
  13   6   2    2.70    2.10
  13   6   2    4.30    3.30
 -13   6  -2    4.60    1.00
  14  -6   2   28.10    4.20
 -14  -6  -2   24.30    2.70
 -14  -6  -2   25.60    3.80
  14  -6   2   34.70    7.20
  14   6   2   23.20    1.80
 -14   6  -2   22.90    2.00
  14   6   2   20.90    4.60
 -14   6  -2   21.30    1.50
  14   6   2   23.10    1.90
  14   6   2   21.30    3.80
 -15  -6  -2   -0.90    1.20
  15  -6   2   -5.80    3.70
 -15  -6  -2    0.90    2.90
 -15   6  -2    0.40    0.70
  15   6   2   -3.40    3.10
  15   6   2   -2.30    2.40
  15   6   2   -0.30    0.70
  15   6   2    0.70    0.40
  16  -6   2   -3.60    4.00
 -16  -6  -2    2.50    2.70
 -16  -6  -2   -0.20    1.40
  16   6   2    2.40    0.50
 -16   6  -2    2.10    1.00
 -16   6  -2    2.70    0.60
  16   6   2    2.80    2.20
  16   6   2    5.30    3.60
 -17  -6  -2   23.20    4.50
 -17  -6  -2   24.50    3.20
  17  -6   2   27.80    6.20
  17  -6   2   26.40    4.70
 -17   6  -2   36.30    2.70
 -17   6  -2   35.10    2.30
  17   6   2   30.30    4.60
  17  -7  -2    0.80    2.50
  17  -7  -2    3.60    4.90
 -17  -7   2    1.90    1.60
 -17  -7   2    0.50    2.50
 -17   7   2    1.60    1.00
  17   7  -2    1.20    3.60
  17   7  -2   -0.40    2.50
 -17   7   2    1.60    0.60
 -16  -7   2    6.30    3.10
  16  -7  -2    7.20    4.60
 -16  -7   2    5.10    2.70
  16  -7  -2    5.30    2.70
  16   7  -2    4.60    2.50
  16   7  -2    8.60    3.50
 -16   7   2    5.50    1.10
 -16   7   2    6.80    1.40
 -15  -7   2    4.60    2.90
 -15  -7   2    3.50    1.70
  15  -7  -2    1.50    4.40
  15  -7  -2    5.10    2.70
  15   7  -2    6.00    3.30
 -15   7   2    1.90    0.60
 -15   7   2    2.60    1.20
 -14  -7   2   36.90    4.90
 -14  -7   2   33.20    3.40
  14   7  -2   46.50    6.60
  14   7  -2   42.10    4.50
 -14   7   2   35.10    2.30
 -14   7   2   32.30    2.80
 -13  -7   2   64.39    6.00
  13  -7  -2   85.09    6.20
  13  -7  -2   84.19    8.60
 -13  -7   2   66.99    4.80
 -13   7   2   68.79    4.40
  13   7  -2   67.59    5.50
  13   7  -2   73.99    3.70
  13   7  -2   75.79    7.50
  12  -7  -2  135.09    8.30
  12  -7  -2  135.29   10.40
 -12  -7   2  121.29    7.20
 -12  -7   2  113.49    9.70
  12   7  -2  119.59    7.60
  12   7  -2  124.69    6.30
  12   7  -2  120.99    9.20
  12   7  -2  132.49    6.60
 -12   7   2  126.69    7.00
  11  -7  -2  179.48   10.50
 -11  -7   2  171.58   10.80
 -11  -7   2  174.18    9.70
  11   7  -2  173.58    8.80
  11   7  -2  182.68   11.60
 -11   7   2  164.88    9.40
  11   7  -2  180.88    9.10
  11   7  -2  195.68   10.10
  10  -7  -2  317.17   18.60
  10  -7  -2  322.57   17.00
 -10  -7   2  310.37   17.60
 -10  -7   2  322.57   16.50
  10   7  -2  330.27   16.00
  10   7  -2  320.37   15.70
 -10   7   2  319.87   16.30
  10   7  -2  317.17   17.90
  -9  -7   2   23.20    2.30
   9  -7  -2   20.30    3.10
   9  -7  -2   20.30    3.90
  -9  -7   2   21.00    3.10
   9   7  -2   23.70    2.70
  -9   7   2   18.20    1.80
   9   7  -2   22.40    1.60
   9   7  -2   21.40    1.40
   9   7  -2   19.90    3.90
  -8  -7   2  141.79    8.00
   8  -7  -2  102.19    8.70
   8   7  -2  121.79    6.60
   8   7  -2  120.39    6.30
  -8   7   2  115.39    6.70
   8   7  -2  137.39    7.00
   8   7  -2  136.19    8.00
  -7  -7   2  197.48    9.90
   7  -7  -2  170.98   11.80
  -7  -7   2  195.48   10.90
   7  -7  -2  185.88   10.30
   7   7  -2  190.38   10.70
   7   7  -2  190.78    9.70
   7   7  -2  200.08    9.90
   7   7  -2  176.08    9.40
   6  -7  -2   22.80    3.70
   6  -7  -2   22.30    2.50
  -6  -7   2   19.80    2.80
  -6  -7   2   17.90    2.00
   6   7  -2   20.40    1.70
   6   7  -2   16.90    2.00
   6   7  -2   18.80    2.90
  -5  -7   2  750.42   36.00
  -5  -7   2  738.63   36.80
   5  -7  -2  726.63   36.10
   5   7  -2  729.53   35.80
   5   7  -2  727.43   35.90
   5   7  -2  694.83   36.30
  -4  -7   2   49.20    3.10
  -4  -7   2   49.40    3.80
   4  -7  -2   43.80    3.20
   4   7  -2   46.80    3.00
  -3  -7   2    6.70    1.20
  -3  -7   2    4.20    1.40
   2  -7  -2  326.77   18.10
   2  -7  -2  388.16   18.00
  -2  -7   2  375.86   18.10
  -2  -7   2  372.06   18.80
  -2   7   2  348.77   18.30
  -2   7   2  359.66   18.60
   2   7  -2  360.66   18.30
  -1  -7   2  699.93   35.80
  -1  -7   2  708.73   36.40
   1  -7  -2  740.33   35.70
  -1   7   2  759.22   36.00
   0  -7  -2  131.19    6.90
   0  -7   2  130.69    7.00
   0   7   2  136.69    7.20
   1  -7   2  170.58    9.20
  -1  -7  -2  177.68    9.20
   1   7   2  193.08    9.50
   2  -7   2  108.09    6.50
   2   7   2  147.29    6.90
  -3  -7  -2   63.29    3.70
   3  -7   2   65.59    3.80
   3  -7   2   64.09    3.60
   3   7   2   56.39    4.50
   3   7   2   71.49    3.80
  -4  -7  -2  231.28   11.80
   4  -7   2  244.98   12.50
   4  -7   2  236.68   11.80
  -4  -7  -2  223.98   12.50
   4   7   2  243.28   11.80
  -4   7  -2  227.28   12.30
   4   7   2  225.68   12.50
   4   7   2  212.88   11.40
  -5  -7  -2   20.00    1.90
   5  -7   2   23.50    3.40
  -5  -7  -2   17.10    2.50
   5   7   2   17.90    3.50
   5   7   2   19.10    2.10
   5   7   2   21.30    1.30
   5   7   2   22.60    1.70
  -6  -7  -2    2.80    0.90
   6  -7   2   -0.80    1.80
  -6  -7  -2    2.90    1.50
   6  -7   2   -0.20    1.00
   6   7   2    2.00    1.10
   6   7   2    1.30    0.70
   6   7   2    0.60    1.60
   6   7   2    1.60    0.40
  -7  -7  -2  310.37   15.70
   7  -7   2  312.57   15.90
   7  -7   2  297.67   16.90
  -7  -7  -2  309.47   16.60
   7   7   2  315.17   16.00
   7   7   2  316.37   15.60
   7   7   2  310.17   15.30
   7   7   2  306.27   17.00
   8  -7   2  204.68   10.60
  -8  -7  -2  192.68   10.20
   8  -7   2  185.88   11.70
  -8  -7  -2  191.28   11.10
   8   7   2  196.48   10.50
   8   7   2  192.68    9.90
   8   7   2  196.58   11.70
   8   7   2  189.88    9.70
   9  -7   2   15.20    3.30
  -9  -7  -2   10.80    1.90
   9  -7   2   12.30    3.10
  -9  -7  -2   13.80    2.60
   9   7   2    9.50    3.00
   9   7   2   11.70    2.30
   9   7   2   13.40    1.00
   9   7   2   12.30    1.30
  -9   7  -2   14.60    1.40
  10  -7   2   15.30    3.10
  10  -7   2   20.30    3.90
  10   7   2   22.00    1.40
 -10   7  -2   18.90    1.70
  10   7   2   21.30    1.70
 -11  -7  -2  190.98   10.00
  11  -7   2  186.38   10.70
 -11  -7  -2  183.58   11.10
  11  -7   2  175.68   12.50
  11   7   2  190.98    9.60
  11   7   2  175.48   12.00
  11   7   2  191.08    9.30
 -11   7  -2  192.98    9.70
  11   7   2  186.58   10.50
 -12  -7  -2    7.40    2.50
  12  -7   2    9.90    2.30
 -12  -7  -2    5.90    1.60
  12  -7   2   11.80    4.00
 -12   7  -2    7.90    1.30
  12   7   2    7.40    1.20
  12   7   2   10.90    3.30
  12   7   2    7.20    1.10
 -13  -7  -2   22.80    3.00
  13  -7   2   29.30    4.10
 -13  -7  -2   26.60    4.20
  13  -7   2   32.00    6.40
  13   7   2   34.60    5.40
 -13   7  -2   30.60    1.90
 -13   7  -2   31.10    2.30
  13   7   2   25.40    3.90
  13   7   2   32.20    1.80
  13   7   2   33.70    2.20
 -14  -7  -2   -2.60    2.40
 -14  -7  -2   -1.90    1.20
  14  -7   2   -0.60    2.00
  14  -7   2   -3.30    3.70
  14   7   2    0.80    0.70
  14   7   2   -4.10    2.80
 -14   7  -2    1.50    0.80
  14   7   2   -2.00    1.90
 -15  -7  -2   10.90    3.20
 -15  -7  -2   11.20    2.10
  15  -7   2   10.50    5.20
  15   7   2   16.20    1.50
 -15   7  -2   18.80    1.80
 -15   7  -2   15.00    1.20
  15   7   2    9.90    2.90
  15   7   2    8.60    4.00
  15   7   2   16.00    1.20
 -16  -7  -2    5.10    1.80
  16  -7   2   -1.80    4.20
 -16  -7  -2    8.10    3.10
 -16   7  -2    1.40    0.50
  16   7   2    3.60    2.40
  16   7   2    1.90    0.40
  16   7   2    5.20    3.60
  16   7   2    1.70    0.80
 -16   7  -2    2.00    0.90
  17  -7   2    2.40    2.40
  17  -7   2    4.10    4.50
 -17  -7  -2    5.30    3.10
  17   7   2    7.30    5.00
  16  -8  -2   68.89    6.30
  16  -8  -2   68.09   12.10
 -16  -8   2   51.99    4.60
 -16  -8   2   49.20    6.30
  16   8  -2   58.29    7.20
 -16   8   2   59.39    4.00
 -16   8   2   58.69    3.40
  16   8  -2   52.09    5.60
 -15  -8   2   20.70    4.30
  15  -8  -2   30.00    4.90
 -15  -8   2   24.10    3.30
  15  -8  -2   25.60    6.10
 -15   8   2   23.30    2.40
  15   8  -2   17.80    4.20
 -15   8   2   22.10    1.80
 -15   8   2   25.70    2.90
  15   8  -2   35.20    6.00
 -14  -8   2  125.19    9.20
  14  -8  -2  113.09   11.30
  14  -8  -2  130.69   10.90
 -14  -8   2  127.29    7.70
  14   8  -2  136.39    6.40
 -14   8   2  117.19    7.10
  14   8  -2  132.99    8.30
  14   8  -2  135.29   10.10
 -13  -8   2   14.70    3.20
  13   8  -2   13.90    3.70
 -13   8   2   13.00    1.90
  13   8  -2   17.50    3.50
  13   8  -2   12.90    1.40
  13   8  -2   11.60    1.00
  12  -8  -2   64.89    7.40
 -12  -8   2   48.90    5.20
 -12  -8   2   51.19    4.10
  12  -8  -2   54.99    5.20
  12   8  -2   52.89    6.20
  12   8  -2   58.59    3.00
 -12   8   2   54.09    3.60
  12   8  -2   50.89    4.50
  12   8  -2   61.19    3.30
 -11  -8   2    7.40    1.70
  11  -8  -2   15.70    3.60
 -11  -8   2    6.10    3.90
  11  -8  -2   15.00    4.20
  11   8  -2   11.40    3.10
  11   8  -2   11.50    1.30
  11   8  -2   11.10    1.00
  11   8  -2    7.60    2.00
 -11   8   2    9.10    1.60
  10  -8  -2   54.99    6.50
 -10  -8   2   47.60    3.80
  10  -8  -2   56.79    4.80
 -10  -8   2   45.10    5.00
  10   8  -2   47.50    5.80
  10   8  -2   49.70    6.40
  10   8  -2   52.89    3.10
  10   8  -2   51.69    2.80
 -10   8   2   57.09    3.50
  -9  -8   2    6.60    2.30
   9  -8  -2   15.00    2.90
  -9  -8   2    7.60    1.60
   9  -8  -2   12.90    3.60
   9   8  -2    9.50    0.90
   9   8  -2   11.10    1.30
   9   8  -2    6.70    2.50
   9   8  -2    9.50    1.80
  -9   8   2   10.40    1.40
   8  -8  -2   87.49    7.20
  -8  -8   2   79.99    4.80
  -8  -8   2   76.49    5.90
   8   8  -2   75.59    4.10
   8   8  -2   79.89    4.40
   8   8  -2   80.69    4.80
   8   8  -2   73.69    5.90
   7  -8  -2    1.10    2.60
  -7  -8   2    3.00    1.30
   7  -8  -2    1.90    1.50
  -7  -8   2    2.30    1.60
   7   8  -2    1.60    0.50
   7   8  -2    1.30    0.80
   7   8  -2    4.60    1.80
  -6  -8   2 1401.26   69.39
   6  -8  -2 1388.76   68.59
  -6  -8   2 1422.86   68.39
   6   8  -2 1381.16   68.89
   6   8  -2 1408.36   68.19
   6   8  -2 1365.46   68.29
  -5  -8   2   57.29    4.90
  -5  -8   2   64.59    4.00
   5  -8  -2   59.19    4.20
   5   8  -2   67.69    3.80
   5   8  -2   62.99    3.90
  -4  -8   2   33.40    2.50
  -4  -8   2   29.90    3.30
   4  -8  -2   25.90    2.70
   4   8  -2   34.50    2.50
  -4   8   2   32.70    2.60
   3  -8  -2   62.29    3.80
  -3  -8   2   59.39    3.70
  -3  -8   2   59.19    4.50
  -3   8   2   52.69    4.30
   3   8  -2   61.39    3.80
  -3   8   2   61.19    3.90
   2  -8  -2  232.48   12.50
  -2  -8   2  237.48   13.20
   2  -8  -2  260.87   12.40
  -2  -8   2  237.38   12.40
  -2   8   2  250.07   12.70
   2   8  -2  245.78   12.70
  -2   8   2  239.68   12.90
   1  -8  -2  156.58    8.10
  -1  -8   2  150.18    8.90
  -1  -8   2  156.78    8.20
  -1   8   2  160.18    8.50
   0  -8   2 1105.09   56.49
   0   8   2 1203.78   56.79
  -1  -8  -2  220.68   11.30
   1  -8   2  213.68   11.20
   1   8   2  225.88   11.50
  -2  -8  -2  239.88   12.40
   2  -8   2  235.48   12.30
   2   8   2  245.68   13.10
   2   8   2  252.57   12.60
  -3  -8  -2  225.58   11.80
   3  -8   2  234.78   11.70
   3  -8   2  226.78   11.70
   3   8   2  222.88   12.50
   3   8   2  242.48   12.00
   4  -8   2  211.08   11.80
   4  -8   2  201.78   10.90
  -4  -8  -2  214.88   11.00
   4  -8   2  227.78   10.90
  -4  -8  -2  212.68   11.80
   4   8   2  218.08   11.10
  -4   8  -2  198.88   11.40
   4   8   2  213.28   11.80
   4   8   2  218.08   11.10
  -5  -8  -2    9.00    1.70
   5  -8   2   10.70    2.60
   5  -8   2    8.50    1.80
  -5  -8  -2   11.90    2.30
   5   8   2   11.20    1.00
   5   8   2    8.60    1.80
   5   8   2   11.60    1.40
   5   8   2   14.00    2.50
   6  -8   2   38.30    4.50
  -6  -8  -2   49.50    4.10
   6  -8   2   43.00    3.40
  -6  -8  -2   49.60    3.30
   6   8   2   49.40    3.50
   6   8   2   47.00    3.00
   6   8   2   55.39    4.80
   6   8   2   46.80    2.60
  -7  -8  -2  168.48   10.20
   7  -8   2  175.78    9.40
   7  -8   2  174.08   10.60
  -7  -8  -2  178.08    9.30
   7   8   2  171.88    9.40
   7   8   2  170.68    8.70
   7   8   2  168.18   10.50
   7   8   2  175.28    9.00
   8  -8   2  184.38   10.50
  -8  -8  -2  184.48   10.30
  -8  -8  -2  189.78   11.20
   8  -8   2  185.88   11.70
   8   8   2  198.98    9.90
   8   8   2  193.28   11.70
   8   8   2  197.88    9.60
   8   8   2  199.08   10.50
   9  -8   2  110.69    6.30
  -9  -8  -2   89.69    6.80
  -9  -8  -2   89.29    5.70
   9  -8   2  105.39    7.90
  -9   8  -2   94.29    5.40
   9   8   2   85.79    7.60
   9   8   2  100.29    5.30
   9   8   2   98.89    5.00
 -10  -8  -2   32.70    3.10
  10  -8   2   44.10    5.80
 -10  -8  -2   32.20    4.10
  10   8   2   37.80    2.50
  10   8   2   32.20    3.70
 -10   8  -2   42.60    2.60
  10   8   2   38.80    2.70
  10   8   2   31.50    5.20
  11  -8   2   24.20    6.50
  11   8   2   18.90    1.70
  11   8   2   17.00    1.30
 -11   8  -2   19.20    1.80
  12  -8   2   41.10    4.60
 -12  -8  -2   42.40    3.70
  12  -8   2   45.30    6.90
 -12  -8  -2   38.60    4.90
  12   8   2   51.49    4.50
 -12   8  -2   42.90    3.00
  12   8   2   59.39    6.60
  12   8   2   46.30    2.90
  12   8   2   48.20    2.60
 -13  -8  -2   -0.90    2.50
 -13  -8  -2    0.90    1.50
  13  -8   2    7.80    3.80
  13  -8   2    7.60    2.30
 -13   8  -2    4.80    1.00
  13   8   2    4.70    1.00
  13   8   2   -1.50    3.20
  13   8   2    4.50    0.80
  13   8   2    0.90    2.10
 -14  -8  -2   20.60    3.90
  14  -8   2   22.20    5.00
  14  -8   2   20.90    5.20
 -14  -8  -2   20.20    3.00
  14   8   2   23.40    1.50
  14   8   2   20.70    4.00
 -14   8  -2   22.60    1.60
 -14   8  -2   26.40    2.10
  14   8   2   21.30    4.80
  14   8   2   23.90    1.90
 -15  -8  -2   10.20    3.10
 -15  -8  -2    7.60    1.90
  15  -8   2    0.00    4.60
  15   8   2    8.20    1.20
  15   8   2    7.10    2.60
  15   8   2    8.00    0.90
 -15   8  -2   10.60    1.50
 -15   8  -2    8.60    1.00
  15   8   2    7.40    3.90
  16  -8   2   -1.20    2.40
 -16  -8  -2    2.50    3.00
  16  -8   2   -0.60    3.90
 -16  -8  -2   -0.40    1.50
 -16   8  -2    0.90    0.50
  16   8   2    1.80    0.70
  16   8   2   -1.00    2.10
 -16   8  -2    1.30    0.80
  16   8   2    2.80    3.40
  16   8   2    0.90    0.40
 -16  -9   2   12.50    2.50
  16  -9  -2    9.10    3.10
  16  -9  -2   12.20    6.70
 -16  -9   2   19.60    4.40
 -16   9   2   15.60    2.00
 -16   9   2   15.00    2.30
  16   9  -2   15.60    4.40
  16   9  -2   12.50    3.10
 -16   9   2   15.10    1.40
 -15  -9   2   21.30    4.50
  15  -9  -2   26.50    4.80
  15  -9  -2   17.70    5.40
 -15  -9   2   21.10    3.40
 -15   9   2   18.20    2.20
 -15   9   2   21.40    3.10
  15   9  -2   31.60    5.90
 -15   9   2   18.90    1.60
  14  -9  -2  100.99   11.10
 -14  -9   2  104.89    8.60
  14  -9  -2  108.39    8.10
 -14  -9   2  110.29    7.00
  14   9  -2   93.59    5.60
 -14   9   2  107.99    6.80
  14   9  -2  118.09    7.60
 -14   9   2  111.79    6.30
  14   9  -2  133.29    9.50
 -13  -9   2    6.70    3.00
 -13  -9   2    4.90    1.80
  13  -9  -2    0.70    3.60
  13  -9  -2    3.90    2.30
 -13   9   2    5.50    1.30
  13   9  -2    3.80    0.60
  13   9  -2    2.80    3.50
  13   9  -2    2.10    2.10
  13   9  -2    5.40    1.00
  12  -9  -2   31.80    4.40
  12  -9  -2   31.50    6.60
 -12  -9   2   35.70    3.30
 -12  -9   2   34.40    4.60
  12   9  -2   34.90    2.00
 -12   9   2   33.90    3.00
  12   9  -2   38.00    2.40
  12   9  -2   29.20    3.70
  12   9  -2   27.60    5.40
 -11  -9   2    3.80    1.50
  11  -9  -2    8.40    3.90
 -11  -9   2    2.40    2.40
 -11   9   2    3.90    1.20
  11   9  -2    4.60    0.80
  11   9  -2    5.10    1.00
  11   9  -2    8.20    2.80
  11   9  -2    3.40    1.80
 -10  -9   2  278.97   16.90
  10  -9  -2  289.57   17.90
  10  -9  -2  301.07   15.90
 -10  -9   2  284.77   15.30
  10   9  -2  295.47   15.70
  10   9  -2  297.27   14.40
  10   9  -2  294.47   16.50
  10   9  -2  298.87   14.80
 -10   9   2  283.47   15.00
   9  -9  -2   14.70    3.20
  -9  -9   2   25.50    3.90
   9  -9  -2   11.00    3.90
   9   9  -2   24.10    2.80
   9   9  -2   18.30    1.70
   9   9  -2   20.00    4.10
  -9   9   2   16.20    1.80
   9   9  -2   19.80    1.40
  -8  -9   2   29.10    2.90
  -8  -9   2   27.40    3.90
   8  -9  -2   34.10    3.50
   8  -9  -2   25.70    5.10
   8   9  -2   30.30    2.80
   8   9  -2   30.40    1.90
   8   9  -2   27.80    4.00
   8   9  -2   32.60    2.30
   7  -9  -2    5.00    1.80
  -7  -9   2    6.50    2.20
  -7  -9   2    5.90    1.40
   7   9  -2    5.50    0.90
   7   9  -2    5.90    1.20
   7   9  -2    7.50    1.90
  -6  -9   2   46.10    4.50
   6  -9  -2   48.70    3.90
  -6  -9   2   50.49    3.60
   6   9  -2   45.80    3.30
   6   9  -2   50.79    3.30
  -5  -9   2   40.40    4.30
   5   9  -2   51.39    3.40
  -5   9   2   55.29    3.70
   5   9  -2   42.60    3.10
  -4  -9   2  242.38   12.90
  -4  -9   2  231.68   13.80
   4  -9  -2  253.27   13.10
  -4   9   2  270.17   13.30
   4   9  -2  251.07   13.00
   3  -9  -2   50.09    3.60
  -3  -9   2   55.49    4.50
  -3  -9   2   56.79    3.50
   3   9  -2   50.59    3.70
  -3   9   2   50.79    3.70
  -2  -9   2  472.55   25.10
  -2  -9   2  476.45   24.20
   2  -9  -2  516.05   24.10
   2   9  -2  487.45   24.50
  -2   9   2  443.56   24.60
  -2   9   2  513.95   24.60
   1  -9  -2    8.70    1.40
  -1   9   2    6.00    1.70
   1   9  -2    6.30    1.60
   0  -9  -2   68.29    4.00
   0  -9   2   69.19    4.10
   0   9   2   67.09    4.40
  -1  -9  -2   16.90    1.70
   1  -9   2   18.30    1.80
   1   9   2   12.00    2.00
   1   9   2   13.40    2.40
   2  -9   2  512.55   25.70
  -2  -9  -2  518.95   25.80
   2   9   2  498.45   26.40
   2   9   2  545.25   26.10
  -3  -9  -2   61.89    3.60
   3  -9   2   47.40    3.30
   3  -9   2   47.10    3.20
   3   9   2   60.89    3.60
  -4  -9  -2  172.88    9.10
   4  -9   2  170.78    8.80
   4   9   2  177.58    9.10
   4   9   2  178.08    9.00
  -4   9  -2  150.28    9.30
  -5  -9  -2  164.18    8.80
  -5  -9  -2  162.18    9.70
   5   9   2  162.48    8.80
   5   9   2  173.48    8.80
   5   9   2  161.98    9.80
   5   9   2  162.08    8.30
  -6  -9  -2    1.50    1.20
   6  -9   2    3.20    1.30
   6  -9   2    2.10    2.00
  -6  -9  -2    2.50    1.90
   6   9   2    2.30    1.20
   6   9   2    2.00    2.00
   6   9   2    2.30    0.90
   6   9   2    2.20    0.50
   7  -9   2  141.29    8.30
  -7  -9  -2  146.29    8.10
  -7  -9  -2  141.89    9.10
   7  -9   2  146.29    9.60
   7   9   2  142.29    7.40
   7   9   2  149.29    8.20
   7   9   2  142.09    7.80
   7   9   2  156.68    9.50
   8  -9   2  324.47   16.30
  -8  -9  -2  307.67   16.10
  -8  -9  -2  304.97   17.20
   8  -9   2  313.77   17.70
   8   9   2  311.87   17.50
   8   9   2  307.27   15.60
   8   9   2  305.47   16.20
   8   9   2  316.57   15.80
   9  -9   2    3.50    3.00
  -9  -9  -2    8.10    1.70
  -9  -9  -2    8.50    2.60
   9   9   2   11.00    2.10
   9   9   2    9.60    3.20
 -10  -9  -2   42.80    3.70
 -10  -9  -2   43.50    5.10
  10  -9   2   33.20    6.30
  10  -9   2   38.40    4.30
  10   9   2   46.10    2.90
  10   9   2   44.60    2.50
  10   9   2   37.30    5.80
  10   9   2   40.30    4.10
 -10   9  -2   42.90    2.90
  11  -9   2   -1.60    1.80
 -11  -9  -2    0.60    2.80
 -11  -9  -2    0.90    1.50
  11  -9   2   -5.70    3.30
 -11   9  -2    1.60    0.90
  11   9   2   -0.20    1.70
  11   9   2   -0.70    2.80
  11   9   2    1.20    0.80
  11   9   2    0.90    0.50
 -12  -9  -2    7.00    1.90
 -12  -9  -2    7.40    3.00
  12  -9   2    8.20    2.30
  12  -9   2   11.50    3.90
  12   9   2    7.70    2.30
 -12   9  -2    9.60    1.40
  12   9   2    8.70    1.40
  12   9   2    7.80    1.00
  12   9   2    5.90    3.40
  13  -9   2   73.49    5.70
 -13  -9  -2   50.09    6.00
  13  -9   2   77.19    8.20
 -13  -9  -2   54.19    4.70
 -13   9  -2   64.69    3.90
  13   9   2   65.89    3.80
  13   9   2   64.79    3.40
  13   9   2   59.89    7.30
  13   9   2   59.49    5.30
 -14  -9  -2    3.70    1.90
  14  -9   2    1.40    4.20
 -14  -9  -2    1.90    2.80
  14  -9   2    3.20    3.30
  14   9   2    5.50    3.80
  14   9   2    1.90    2.40
  15  -9   2    1.30    4.30
 -15  -9  -2    4.10    1.90
  15  -9   2    2.70    2.60
 -15  -9  -2   10.50    3.60
 -15   9  -2    6.80    1.40
  15   9   2   10.20    1.90
 -15   9  -2    7.30    0.90
  15   9   2    6.20    2.70
  15   9   2    5.70    0.90
  15   9   2    9.10    3.90
 -16  -9  -2    7.50    3.20
 -16  -9  -2    4.40    3.40
 -16   9  -2    7.90    1.40
  16   9   2    9.60    0.90
 -16   9  -2    6.50    0.90
  16   9   2    6.30    2.60
  16   9   2    9.50    3.80
  15 -10  -2   83.19    7.50
 -15 -10   2   85.09    8.30
  15 -10  -2   80.39   10.80
 -15 -10   2   85.79    6.30
  15  10  -2   95.09    8.30
 -15  10   2   89.49    5.40
  15  10  -2   93.99    4.60
 -15  10   2   72.69    6.50
  15  10  -2  102.69    7.60
  14 -10  -2    8.20    5.00
 -14 -10   2    8.30    2.30
 -14 -10   2   12.00    3.50
  14  10  -2   10.10    1.10
  14  10  -2   13.60    3.70
 -14  10   2   11.60    1.80
  14  10  -2    9.60    2.70
  14  10  -2   10.30    1.50
 -13 -10   2    3.90    3.00
  13 -10  -2    2.70    2.40
  13 -10  -2    1.50    4.10
 -13 -10   2    3.80    1.90
  13  10  -2    4.30    1.00
  13  10  -2    3.40    0.60
  13  10  -2    2.30    2.10
 -13  10   2    5.40    1.30
  13  10  -2    5.50    3.30
 -13  10   2    3.60    1.70
 -12 -10   2    4.00    1.90
  12 -10  -2    1.00    2.40
  12 -10  -2    6.50    4.00
 -12 -10   2    3.90    3.00
  12  10  -2    6.60    1.10
 -12  10   2    2.30    1.60
  12  10  -2    4.40    2.00
 -12  10   2    4.40    1.20
  12  10  -2    4.70    0.80
 -11 -10   2   24.70    3.20
 -11 -10   2   18.10    4.00
  11 -10  -2   22.70    5.10
  11 -10  -2   27.90    4.30
  11  10  -2   22.80    1.60
  11  10  -2   25.70    2.10
  11  10  -2   27.10    3.30
  11  10  -2   29.80    4.90
 -11  10   2   21.30    2.30
  10 -10  -2  107.69    7.40
 -10 -10   2  105.89    6.80
 -10 -10   2  102.69    8.20
  10  10  -2  127.39    8.30
 -10  10   2  111.99    6.40
  10  10  -2  106.29    5.70
  10  10  -2  110.59    6.10
  10  10  -2  116.99    6.80
  -9 -10   2   92.99    6.10
  -9 -10   2   91.79    7.40
   9  10  -2  106.49    6.00
   9  10  -2   96.49    5.50
   9  10  -2  101.19    7.30
   9  10  -2   96.89    5.30
  -8 -10   2    1.00    2.20
  -8 -10   2   -0.50    1.20
   8  10  -2   -0.20    0.80
   8  10  -2   -0.50    1.10
   8  10  -2   -2.50    1.60
  -7 -10   2   97.49    7.10
   7 -10  -2   92.69    6.30
  -7 -10   2   99.19    5.90
   7  10  -2   97.39    5.60
   7  10  -2  100.29    5.60
  -7  10   2   91.89    6.00
  -6 -10   2  140.89    9.30
   6 -10  -2  158.38    8.70
  -6 -10   2  145.49    8.20
  -6  10   2  147.29    8.50
   6  10  -2  144.79    7.80
   6  10  -2  142.79    8.10
   5 -10  -2  223.98   11.90
  -5 -10   2  218.18   12.90
  -5 -10   2  217.48   11.70
   5  10  -2  223.18   11.70
  -5  10   2  220.48   12.00
   4 -10  -2   36.20    3.10
  -4  10   2   37.60    3.20
   4  10  -2   42.50    3.10
  -3 -10   2   16.40    2.00
   3 -10  -2   15.00    2.10
  -3 -10   2   14.40    2.80
   3  10  -2   14.30    2.10
  -3  10   2   13.50    2.10
  -2 -10   2  103.69    6.00
  -2 -10   2   89.49    6.60
   2 -10  -2  104.49    5.60
   2  10  -2  102.49    6.10
  -2  10   2  101.99    6.10
   1 -10  -2   48.80    3.10
  -1 -10   2   44.50    3.20
  -1  10   2   45.90    3.80
  -1  10   2   49.30    3.70
   1  10  -2   46.90    3.70
   0 -10   2    8.70    1.70
   0 -10  -2   10.30    1.60
   0  10   2   12.60    2.10
   1 -10   2    7.70    1.50
  -1 -10  -2    7.70    1.30
   1  10   2    8.60    1.70
  -2 -10  -2    3.10    1.10
   2  10   2    3.60    1.30
   3 -10   2  376.46   18.70
   3  10   2  385.96   19.00
   3  10   2  351.16   19.50
  -4 -10  -2   58.39    4.20
   4  10   2   70.59    4.30
   4  10   2   68.09    4.20
   4  10   2   74.29    5.50
   5 -10   2   13.80    2.10
  -6 -10  -2  120.09    8.20
   6 -10   2  142.39    7.30
   6 -10   2  136.09    8.80
  -6 -10  -2  120.29    7.10
   6  10   2  124.09    7.20
   6  10   2  117.89    6.50
   6  10   2  120.79    6.90
   6  10   2  123.19    8.40
  -7 -10  -2    0.10    2.00
   7 -10   2   -0.90    1.30
   7 -10   2   -1.10    2.20
  -7 -10  -2    0.90    1.30
   7  10   2    1.40    2.20
   7  10   2    0.50    0.90
   7  10   2    0.60    0.50
   7  10   2    1.80    1.40
   8 -10   2   17.50    3.80
  -8 -10  -2   16.00    3.30
   8 -10   2   18.80    3.10
  -8 -10  -2   14.70    2.60
   8  10   2   17.60    1.40
   8  10   2   18.50    1.80
   8  10   2   15.80    3.40
   8  10   2   13.00    3.00
   9 -10   2  154.98    8.80
   9 -10   2  162.98   10.70
  -9 -10  -2  143.59    8.50
  -9 -10  -2  136.29    9.70
   9  10   2  140.89    8.70
   9  10   2  136.39   10.30
   9  10   2  152.48    8.00
   9  10   2  152.78    7.60
  10 -10   2   65.59    5.40
 -10 -10  -2   58.69    6.70
 -10 -10  -2   66.79    4.90
  10 -10   2   67.69    7.50
  10  10   2   71.19    3.70
 -10  10  -2   67.99    4.20
  10  10   2   73.49    4.10
  10  10   2   64.69    5.10
  10  10   2   63.99    6.70
  11 -10   2   21.10    4.10
  11 -10   2   17.20    4.50
 -11 -10  -2   25.50    4.40
 -11 -10  -2   26.00    3.10
 -11  10  -2   17.30    1.90
  11  10   2   23.00    5.40
  11  10   2   20.50    1.50
  11  10   2   18.60    1.90
  12 -10   2   12.00    2.70
  12 -10   2   18.00    4.30
 -12 -10  -2   14.80    2.90
 -12 -10  -2   11.80    3.50
  12  10   2   14.50    1.20
 -12  10  -2   14.70    1.70
  12  10   2   11.10    2.60
  12  10   2   16.10    2.10
  12  10   2   11.40    3.90
  13 -10   2    3.70    2.20
 -13 -10  -2   -1.00    1.70
  13 -10   2    4.10    3.70
 -13 -10  -2   -3.10    2.80
  13  10   2    1.00    0.50
  13  10   2    1.50    1.00
  13  10   2   -2.30    2.10
  13  10   2   -0.90    3.10
  14 -10   2    8.40    4.20
 -14 -10  -2   -1.70    2.90
  14  10   2   -1.50    2.30
  14  10   2    0.70    3.30
 -14  10  -2    2.20    1.70
  15 -10   2    1.80    2.60
  15 -10   2    0.90    4.30
 -15 -10  -2    0.90    3.10
 -15  10  -2    2.80    1.00
 -15  10  -2    2.00    0.60
  15  10   2    2.30    1.00
  15  10   2    3.80    3.50
  15  10   2    0.10    2.40
  15  10   2    1.50    0.50
 -15 -11   2   -2.20    1.90
 -15 -11   2    1.60    3.80
  15 -11  -2    1.00    2.60
 -15  11   2    1.70    1.10
 -15  11   2    3.00    2.10
  15  11  -2    6.00    3.20
  15  11  -2    0.70    0.90
  15  11  -2    2.20    2.30
 -14 -11   2   26.70    3.80
  14 -11  -2   21.50    4.70
 -14 -11   2   15.50    4.00
 -14  11   2   21.40    2.30
  14  11  -2   19.90    1.90
 -14  11   2   19.50    3.00
  14  11  -2   17.50    1.40
 -13 -11   2   28.80    5.20
 -13 -11   2   30.20    3.90
  13  11  -2   35.30    6.00
 -13  11   2   36.30    2.80
  13  11  -2   35.10    2.50
  13  11  -2   29.40    4.00
 -13  11   2   35.90    3.80
  13  11  -2   33.10    2.00
 -12 -11   2    1.90    2.70
  12 -11  -2    4.40    2.50
 -12 -11   2    2.70    1.90
  12  11  -2    3.40    1.00
 -12  11   2    3.40    1.20
 -12  11   2    4.40    1.90
  12  11  -2    2.90    0.60
  12  11  -2    1.30    4.70
  12  11  -2    2.30    1.90
  11 -11  -2  162.88   10.60
 -11 -11   2  155.98   11.30
 -11 -11   2  160.78    9.80
 -11  11   2  171.78    9.30
  11  11  -2  176.38    9.00
  11  11  -2  172.78    9.60
  11  11  -2  180.98   11.30
  11  11  -2  171.28    8.60
  10 -11  -2    2.90    2.30
 -10 -11   2    2.20    1.70
 -10 -11   2    0.70    2.60
  10  11  -2    1.10    0.60
  10  11  -2    4.80    2.50
  10  11  -2    2.50    1.10
  10  11  -2    3.20    1.70
 -10  11   2    2.30    1.10
 -10  11   2    2.00    1.90
  -9 -11   2    9.00    3.00
   9 -11  -2    5.50    2.20
  -9 -11   2    7.60    1.90
   9  11  -2    7.60    2.70
   9  11  -2    8.40    1.40
  -9  11   2    7.10    2.00
   9  11  -2   11.40    2.40
   9  11  -2   10.50    1.20
   8 -11  -2    1.60    1.90
  -8 -11   2    9.70    3.00
   8  11  -2    4.00    0.70
   8  11  -2    4.70    1.20
  -8  11   2    2.90    1.60
  -7 -11   2  106.09    6.70
   7 -11  -2  123.09    8.50
  -7 -11   2  101.49    8.40
   7  11  -2  111.09    6.40
   7  11  -2  107.69    6.20
  -7  11   2  115.79    7.00
   6 -11  -2   11.90    2.80
  -6 -11   2    7.70    1.80
  -6 -11   2    6.80    2.90
  -6  11   2    5.30    1.90
   6  11  -2    7.00    1.50
  -5 -11   2  112.39    8.20
  -5 -11   2  119.79    7.10
   5 -11  -2  124.29    7.20
   5  11  -2  123.09    7.00
  -5  11   2  124.89    7.40
  -4 -11   2   29.80    3.00
   4 -11  -2   30.90    3.00
  -4 -11   2   29.70    4.10
  -4  11   2   36.60    3.20
   4  11  -2   35.60    3.00
  -3 -11   2   -0.80    1.10
  -3 -11   2   -1.60    1.70
  -3  11   2   -1.50    1.30
   3  11  -2    3.10    1.40
   2  11  -2   21.80    2.90
  -1 -11   2  470.15   24.70
   1 -11  -2  490.05   24.60
   1  11  -2  494.65   25.20
  -1  11   2  511.25   25.10
   0 -11   2   66.19    4.40
   0 -11  -2   68.29    4.30
   0  11   2   72.79    4.70
   0  11  -2   71.99    4.90
  -1 -11  -2    5.10    1.20
   1  11   2    6.70    1.70
  -2 -11  -2  243.98   12.90
   2 -11   2  249.18   12.80
   2  11   2  251.67   13.20
   3 -11   2   39.80    2.70
  -3 -11  -2   36.20    3.00
   3  11   2   32.00    3.00
   4 -11   2   43.00    3.20
  -4 -11  -2   39.60    3.40
   4 -11   2   51.09    3.10
   4  11   2   46.00    4.60
   4  11   2   44.80    3.40
   4  11   2   44.70    3.40
  -5 -11  -2   13.60    2.30
   5  11   2   18.40    2.00
   5  11   2   16.60    3.00
   5  11   2   13.70    2.40
   5  11   2   17.00    1.40
   6 -11   2   51.79    3.80
  -6 -11  -2   46.50    3.60
   6  11   2   48.00    5.10
   6  11   2   45.70    3.60
   6  11   2   40.60    2.70
   6  11   2   44.40    3.30
   7 -11   2   66.89    5.00
  -7 -11  -2   70.19    4.80
   7  11   2   69.49    3.90
   7  11   2   69.49    4.40
   7  11   2   76.69    4.90
   7  11   2   73.29    6.30
  -8 -11  -2   -1.30    1.50
  -8 -11  -2   -3.00    2.90
   8 -11   2   -4.10    2.70
   8  11   2    1.20    2.70
   8  11   2    1.20    0.60
   8  11   2    0.90    0.90
   8  11   2    1.10    1.70
   9 -11   2   -1.30    3.00
   9 -11   2    0.60    1.80
  -9 -11  -2   -0.50    1.50
  -9 -11  -2   -1.70    2.40
   9  11   2    1.30    0.90
   9  11   2   -0.30    1.80
   9  11   2    2.10    3.00
 -10 -11  -2   63.29    4.90
 -10 -11  -2   61.09    6.20
  10 -11   2   68.49    7.70
  10 -11   2   61.99    5.30
  10  11   2   70.69    6.80
  10  11   2   60.89    3.60
  10  11   2   68.09    5.10
 -11 -11  -2   55.89    5.80
  11 -11   2   36.10    7.10
 -11 -11  -2   56.69    4.40
  11 -11   2   40.20    4.80
 -11  11  -2   45.00    3.30
  11  11   2   55.69    3.40
  11  11   2   54.39    4.70
  11  11   2   56.49    9.40
  11  11   2   54.09    2.90
 -12 -11  -2   60.49    6.60
 -12 -11  -2   65.49    5.10
  12 -11   2   81.19    8.60
  12 -11   2   67.79    5.80
  12  11   2   67.09    3.70
  12  11   2   71.69    7.30
  12  11   2   68.99    5.50
  12  11   2   69.29    4.20
 -13 -11  -2   24.90    3.80
  13 -11   2   37.90    4.70
  13 -11   2   49.10    7.70
 -13 -11  -2   26.80    5.10
  13  11   2   30.50    4.50
  13  11   2   33.80    6.40
 -13  11  -2   31.20    2.50
  13  11   2   32.70    2.10
  13  11   2   33.10    2.60
  14 -11   2   64.89    6.20
 -14 -11  -2   59.29    5.50
 -14 -11  -2   61.69    7.00
  14 -11   2   65.69    9.10
  14  11   2   73.79    8.00
  14  11   2   65.99    3.60
  14  11   2   68.69    4.10
 -14  11  -2   66.99    4.20
  15 -11   2   11.90    4.90
  15 -11   2    8.10    2.90
 -15 -11  -2   13.30    4.00
 -15 -11  -2    7.20    2.20
 -15  11  -2   11.50    1.70
  15  11   2    9.40    1.60
  15  11   2   12.70    4.10
  15  11   2   15.60    3.90
  15  11   2    9.60    1.10
 -14 -12   2   28.50    4.20
 -14 -12   2   23.30    5.00
  14 -12  -2   32.80    5.60
 -14  12   2   39.10    4.10
 -14  12   2   32.80    2.80
  14  12  -2   29.80    2.00
  14  12  -2   33.50    4.20
  14  12  -2   37.80    5.40
  14  12  -2   30.40    2.50
 -13 -12   2    4.50    2.20
 -13 -12   2    3.00    3.20
  13 -12  -2    3.90    2.80
  13  12  -2    9.00    2.40
 -13  12   2    7.30    1.50
  13  12  -2    9.40    1.40
  13  12  -2    6.60    1.00
  13  12  -2    8.50    3.30
 -13  12   2    6.10    2.30
  12 -12  -2    9.10    2.80
 -12 -12   2    2.10    3.40
 -12 -12   2    1.60    2.20
  12  12  -2    5.50    1.20
  12  12  -2    5.80    1.00
  12  12  -2    1.60    3.20
 -12  12   2    9.40    1.70
 -12  12   2    6.40    2.20
  12  12  -2    3.30    2.10
 -11 -12   2   15.20    4.00
 -11 -12   2   17.30    3.60
  11 -12  -2   27.90    4.30
  11  12  -2   24.60    2.60
  11  12  -2   17.30    3.70
 -11  12   2   21.40    2.30
 -11  12   2   30.10    3.60
  11  12  -2   17.70    3.20
  11  12  -2   22.40    1.60
 -10 -12   2   28.00    3.80
  10  12  -2   31.70    4.90
  10  12  -2   21.60    3.20
   9 -12  -2   47.70    5.10
  -9 -12   2   48.80    4.30
  -9 -12   2   40.60    5.60
  -9  12   2   53.09    4.40
   9  12  -2   51.49    3.90
   9  12  -2   44.30    3.40
   9  12  -2   48.40    2.90
  -8 -12   2    1.20    2.50
   8 -12  -2    0.20    1.80
  -8 -12   2    0.10    1.50
   8  12  -2    0.30    0.60
   8  12  -2    1.30    1.20
  -8  12   2    0.60    1.70
   8  12  -2    0.20    1.00
  -7 -12   2    3.90    2.60
  -7 -12   2    3.00    1.60
   7 -12  -2    2.50    1.80
   7  12  -2    5.80    1.50
  -6 -12   2  119.49    7.40
  -6 -12   2  114.59    8.70
   6 -12  -2  129.29    7.70
  -6  12   2  119.59    7.70
   6  12  -2  123.19    7.10
  -5 -12   2  118.39    7.10
   5 -12  -2  119.49    7.20
  -5 -12   2  110.79    8.40
   5  12  -2  116.59    6.90
  -5  12   2  114.89    7.30
  -4 -12   2   41.90    6.40
  -4 -12   2   57.69    4.10
   4 -12  -2   51.09    4.10
  -4  12   2   51.39    4.10
   4  12  -2   52.79    4.00
  -3 -12   2   76.79    5.10
   3  12  -2   77.69    5.30
  -3  12   2   80.69    5.40
   2 -12  -2    9.90    1.70
  -2 -12   2    6.70    1.60
   2  12  -2    7.20    2.00
   1 -12  -2   20.70    2.20
  -1  12   2   16.40    2.90
   1  12  -2   18.40    2.90
   0 -12  -2  328.97   17.30
   0 -12   2  328.07   17.30
   0  12   2  348.27   17.90
   0  12  -2  348.97   18.00
   1 -12   2   39.00    2.90
  -1 -12  -2   36.80    3.00
  -1  12  -2   28.50    3.80
   1  12   2   31.40    3.50
   2 -12   2  159.48    8.00
  -2 -12  -2  135.49    8.10
   2  12   2  140.59    8.30
  -3 -12  -2  183.58   10.40
   3 -12   2  201.38   10.20
   3  12   2  193.28   10.60
  -4 -12  -2   23.90    2.70
   5 -12   2    3.40    1.30
  -5 -12  -2    3.20    1.50
   5  12   2    5.70    1.30
   5  12   2    3.70    0.70
   5  12   2    3.20    2.20
   5  12   2    4.50    1.40
   6 -12   2    8.20    2.00
  -6 -12  -2   14.50    2.50
   6  12   2    9.50    2.00
   6  12   2   11.60    1.40
  -7 -12  -2  222.88   12.10
   7 -12   2  218.48   12.10
   7  12   2  215.28   11.90
   7  12   2  251.67   13.30
   7  12   2  212.48   11.20
   7  12   2  219.68   13.20
   8 -12   2  169.28    9.60
  -8 -12  -2  157.98    9.40
   8  12   2  164.18    8.90
   8  12   2  164.68   10.80
   8  12   2  164.28    8.40
  -9 -12  -2    0.70    1.80
   9  12   2    3.80    1.90
   9  12   2    2.70    1.20
   9  12   2    4.90    2.90
   9  12   2    3.30    0.70
 -10 -12  -2   45.60    4.30
  10 -12   2   47.80    4.70
  10  12   2   45.40    3.30
  10  12   2   56.49    6.30
  10  12   2   48.90    4.50
  10  12   2   44.80    2.80
  11 -12   2    5.30    2.40
  11 -12   2   10.10    4.10
  11  12   2   10.00    1.10
 -11  12  -2    8.20    1.50
  11  12   2   12.50    3.70
  11  12   2    8.40    1.40
 -12 -12  -2   13.40    2.60
 -12 -12  -2   16.10    4.20
  12 -12   2   19.10    5.00
 -12  12  -2   14.50    1.90
  12  12   2   14.30    1.80
  12  12   2   14.90    1.40
 -13 -12  -2   -1.30    3.40
  13 -12   2    9.80    4.30
 -13 -12  -2   -1.40    1.90
  13  12   2    2.00    1.00
  13  12   2    1.40    0.60
  13  12   2    2.30    2.30
 -13  12  -2    1.10    1.00
  13  12   2    6.00    3.50
 -14 -12  -2   32.20    4.10
  14 -12   2   34.00    5.50
  14 -12   2   38.90    7.60
  14  12   2   36.90    4.50
  14  12   2   32.60    2.70
 -14  12  -2   29.20    2.60
  14  12   2   45.60    6.80
  14  12   2   31.00    2.10
  13 -13  -2    1.20    2.50
 -13 -13   2    2.90    3.30
 -13 -13   2    3.50    2.20
 -13  13   2    1.50    1.20
  13  13  -2    5.80    3.10
  13  13  -2    1.10    0.60
  13  13  -2    1.10    2.00
  13  13  -2    1.30    1.00
 -13  13   2    4.00    2.20
  12 -13  -2    7.20    3.70
 -12 -13   2    3.60    2.30
 -12 -13   2    3.80    3.20
 -12  13   2   14.30    2.70
  12  13  -2    7.80    1.50
 -12  13   2   12.40    1.90
  12  13  -2    4.30    3.20
  12  13  -2    7.80    1.10
  12  13  -2    6.00    2.10
  11 -13  -2    8.00    2.70
 -11 -13   2    1.40    3.00
 -11 -13   2    2.30    2.20
  11  13  -2    4.90    1.30
  11  13  -2    3.60    0.70
 -11  13   2    4.20    1.40
  11  13  -2    2.50    1.80
 -11  13   2    8.40    2.40
 -10 -13   2   53.19    6.40
  10 -13  -2   69.29    5.90
 -10 -13   2   45.50    6.10
  10  13  -2   60.49    3.40
  10  13  -2   53.29    4.30
  10  13  -2   54.79    3.80
  -9 -13   2    3.00    2.90
   9 -13  -2   -1.40    1.90
  -9 -13   2    3.40    2.00
  -9  13   2   -0.70    1.80
   9  13  -2    1.20    0.70
   9  13  -2    1.20    1.10
  -8 -13   2   20.30    3.30
   8 -13  -2   14.50    2.80
  -8 -13   2   13.90    3.50
   8  13  -2   19.00    1.70
  -8  13   2   18.80    3.10
   8  13  -2   17.80    2.20
   7 -13  -2   12.30    2.40
   7  13  -2   11.60    1.90
  -7  13   2    8.00    2.20
  -6 -13   2    3.30    1.90
  -6 -13   2    4.60    3.00
  -6  13   2    7.70    2.20
   6  13  -2    7.50    1.80
  -5 -13   2   -1.40    2.30
  -5 -13   2   -0.50    1.50
   5 -13  -2   -0.50    1.70
  -5  13   2    1.80    1.90
   5  13  -2    0.00    1.40
  -4 -13   2    6.20    1.90
  -4  13   2    7.70    2.30
  -3 -13   2   19.80    2.80
   2 -13  -2  179.58    9.30
  -2 -13   2  153.88    9.40
  -2  13   2  179.38   10.20
  -1 -13   2   13.70    2.40
   1 -13  -2   10.40    1.90
  -1  13   2   10.70    2.50
   0 -13  -2   56.49    4.10
   0 -13   2   64.59    4.30
   0  13   2   62.99    5.20
   1 -13   2   20.60    2.40
  -1 -13  -2   24.00    2.60
  -1  13  -2   24.00    3.30
   1  13   2   28.00    3.20
   2 -13   2   39.80    3.10
  -2 -13  -2   34.50    3.20
   2  13   2   37.10    3.40
  -2  13  -2   38.90    4.00
  -3 -13  -2   89.49    5.80
   3 -13   2   94.29    5.50
   3  13   2   93.19    5.90
   4 -13   2   84.79    4.80
  -4 -13  -2   71.79    5.20
   4  13   2   74.39    5.00
   4  13   2   75.19    5.10
   5 -13   2   96.49    6.10
  -5 -13  -2  107.39    6.40
   5  13   2   96.79    6.10
   5  13   2  101.49    5.50
   5  13   2  101.49    6.20
   6 -13   2    4.40    1.60
  -6 -13  -2    4.00    1.70
   6  13   2    3.60    0.80
   6  13   2    5.00    1.70
   6  13   2    4.10    1.50
  -7 -13  -2    3.90    1.80
   7 -13   2    2.70    1.80
   7  13   2    4.80    2.80
   7  13   2    4.10    0.80
   7  13   2    4.20    1.70
   7  13   2    3.50    1.30
  -8 -13  -2   74.59    5.40
   8 -13   2   75.09    5.70
   8  13   2   76.69    4.80
   8  13   2   82.19    7.20
   8  13   2   77.79    4.30
   8  13   2   72.19    6.00
   9 -13   2   29.50    3.90
  -9 -13  -2   22.50    3.40
   9  13   2   25.60    2.00
   9  13   2   22.90    3.50
   9  13   2   21.00    4.10
   9  13   2   27.40    2.50
  10 -13   2   18.80    4.10
 -10 -13  -2   18.10    3.40
  10  13   2   21.00    1.70
  10  13   2   19.50    2.20
  10  13   2   26.00    5.70
  10  13   2   19.90    3.50
  11 -13   2   55.09    5.50
 -11 -13  -2   52.99    6.30
 -11  13  -2   57.99    3.90
  11  13   2   57.79    5.10
  11  13   2   59.59    3.80
  11  13   2   55.49    6.70
  11  13   2   60.39    3.30
  12 -13   2   48.80    5.40
 -12 -13  -2   38.60    4.50
  12  13   2   49.99    3.30
  12  13   2   44.80    2.70
 -12  13  -2   41.60    3.30
  12  13   2   44.80    4.80
  12  13   2   49.40    6.50
  13 -13   2   77.59    6.70
 -13 -13  -2   66.39    5.90
  13  13   2   77.09    6.20
  13  13   2   72.19    4.50
  13  13   2   70.09    4.10
 -13  13  -2   75.49    4.70
  13  13   2   78.39    7.70
 -13 -14   2   -0.90    3.30
  13 -14  -2    0.80    2.70
 -13  14   2    4.10    1.40
  13  14  -2   -0.40    1.00
 -12 -14   2    8.80    2.70
  12 -14  -2    6.20    2.90
 -12 -14   2    5.80    3.80
  12  14  -2    9.40    2.30
  12  14  -2    8.50    1.20
  12  14  -2   12.30    1.90
 -12  14   2   13.60    2.10
 -12  14   2    8.50    2.80
 -11 -14   2   23.60    4.70
 -11  14   2   15.30    3.00
  11  14  -2   19.00    1.70
 -11  14   2   18.50    2.40
  11  14  -2   21.30    3.00
  11  14  -2   19.40    2.30
  10 -14  -2   -0.50    2.60
 -10 -14   2    1.80    2.20
 -10 -14   2    0.70    3.00
  10  14  -2    2.90    1.70
  10  14  -2    2.10    0.80
  10  14  -2    1.90    1.20
 -10  14   2    4.10    2.10
   9 -14  -2   -0.10    2.10
  -9 -14   2    4.40    2.10
  -9 -14   2    1.50    3.10
   9  14  -2    1.70    0.70
   9  14  -2    3.90    1.30
  -9  14   2   -0.90    1.90
  -8 -14   2   31.60    5.50
  -8 -14   2   30.10    6.10
   8 -14  -2   33.80    4.40
   8  14  -2   33.20    2.40
   8  14  -2   34.30    3.00
  -8  14   2   39.00    4.00
   7 -14  -2    1.60    1.90
  -7 -14   2    0.50    1.90
  -7 -14   2    0.20    2.90
   7  14  -2    4.10    1.60
  -7  14   2    4.90    2.10
  -6 -14   2    9.10    2.20
   6 -14  -2   12.80    2.50
   6  14  -2   12.70    2.30
  -6  14   2   12.60    2.60
  -5 -14   2    0.10    1.60
   5  14  -2   -1.10    1.40
  -5  14   2    1.40    1.70
  -4 -14   2   59.09    4.60
   4  14  -2   57.99    4.60
  -4  14   2   61.29    4.90
  -3 -14   2   66.29    4.80
   3  14  -2   59.39    4.80
  -3  14   2   60.89    5.00
   2 -14  -2   65.39    4.10
  -2 -14   2   62.19    4.50
  -2  14   2   57.09    4.80
   2  14  -2   48.40    4.70
  -1 -14   2   89.49    5.90
   1  14  -2   95.59    6.40
   0 -14  -2   29.80    3.10
   0 -14   2   39.50    3.30
   0  14  -2   43.30    4.20
   0  14   2   33.40    3.70
   1 -14   2   39.50    3.50
  -1  14  -2   38.20    4.20
   1  14   2   52.29    4.10
   2 -14   2   13.60    2.30
  -3 -14  -2    2.60    1.40
   3  14   2    3.20    1.60
  -3  14  -2    4.90    2.00
  -4 -14  -2    0.50    1.40
   4 -14   2    1.40    1.00
  -4  14  -2   -0.20    1.60
   4  14   2    0.90    1.30
   4  14   2    0.90    1.20
  -5 -14  -2   88.19    5.80
   5 -14   2   87.99    5.60
   5  14   2   84.59    4.90
   5  14   2   81.59    5.60
   5  14   2   89.09    5.60
  -6 -14  -2   15.10    3.10
   6 -14   2   11.20    2.80
   6  14   2   16.10    2.80
   6  14   2   15.20    1.70
   6  14   2   14.20    2.30
  -7 -14  -2   73.19    5.20
   7 -14   2   61.89    5.20
   7  14   2   68.99    4.00
   7  14   2   68.69    4.60
   7  14   2   67.59    5.00
  -8 -14  -2   10.50    2.40
   8  14   2   11.20    1.90
   8  14   2   12.60    1.60
   8  14   2   11.90    2.30
   9 -14   2  145.29    9.40
   9  14   2  150.68    8.60
   9  14   2  155.68    9.00
   9  14   2  151.78    8.00
   9  14   2  165.18   10.70
 -10 -14  -2    4.70    2.10
  10 -14   2    4.20    2.30
  10  14   2    3.40    1.20
  10  14   2   11.80    3.70
  10  14   2    4.50    2.10
  10  14   2    3.30    0.80
  11 -14   2   64.39    5.50
 -11 -14  -2   55.79    5.00
  11  14   2   45.40    3.60
  11  14   2   54.99    6.40
  11  14   2   54.69    4.80
 -12 -14  -2   28.70    4.10
  12  14   2   26.30    1.90
  12  14   2   27.20    4.10
  12  14   2   26.80    2.50
  12  14   2   33.10    6.00
 -12  14  -2   21.10    2.40
  12 -15  -2    4.10    2.90
 -12 -15   2    4.30    3.70
 -12 -15   2    5.20    2.50
  12  15  -2    6.90    2.10
  11 -15  -2    2.30    2.80
 -11 -15   2    0.20    5.00
 -11 -15   2   -0.80    2.20
  11  15  -2    2.20    1.30
  11  15  -2    1.00    1.00
 -11  15   2    2.70    1.30
 -11  15   2    5.30    2.60
  11  15  -2    1.10    1.60
 -10 -15   2    0.80    3.10
  10 -15  -2    1.60    2.20
 -10 -15   2   -0.30    2.30
  10  15  -2    3.40    1.00
  10  15  -2    4.30    1.40
  -9 -15   2   13.30    4.00
  -9 -15   2   16.50    3.00
   9 -15  -2   22.20    4.30
   9  15  -2   21.40    2.60
   9  15  -2   20.30    1.90
  -8 -15   2    4.20    2.20
   8 -15  -2    0.40    2.10
   8  15  -2    2.90    1.40
  -8  15   2    4.10    2.20
   8  15  -2    2.40    0.80
  -7 -15   2    4.20    2.20
   7 -15  -2    6.20    2.30
  -7  15   2    4.70    2.20
   7  15  -2    7.70    1.80
  -6  15   2    4.10    2.10
   6  15  -2    7.70    1.90
  -5 -15   2   48.60    4.50
  -5  15   2   50.89    4.80
   5  15  -2   51.39    4.20
  -4 -15   2    5.70    2.00
   4  15  -2    5.50    1.90
  -4  15   2    1.30    2.00
  -3 -15   2    6.90    2.00
  -3  15   2    9.50    2.40
   3  15  -2   11.80    2.40
  -2 -15   2    6.30    1.80
   2  15  -2    3.50    1.80
  -2  15   2    4.20    1.90
   1 -15  -2   10.80    2.10
  -1  15   2   10.10    2.30
   1  15  -2    8.30    2.50
   0 -15  -2   39.70    3.40
   0  15  -2   42.50    4.20
   0  15   2   40.50    3.90
  -1 -15  -2  157.78    9.10
   1 -15   2  166.28    9.10
   1  15   2  148.09    9.40
  -1  15  -2  172.48   10.00
   2 -15   2   86.19    5.70
  -2 -15  -2  104.39    6.10
  -2  15  -2   87.19    6.60
   2  15   2   89.59    6.10
   3 -15   2   16.90    2.30
  -3  15  -2   10.60    2.50
  -4 -15  -2   20.30    3.20
  -4  15  -2   28.50    3.90
   4  15   2   22.50    3.00
  -5 -15  -2   51.89    4.40
   5  15   2   48.30    3.20
   5  15   2   45.30    3.90
  -5  15  -2   46.10    4.80
  -6 -15  -2   27.20    3.70
   6  15   2   23.50    3.30
  -6  15  -2   26.70    3.90
   6  15   2   31.10    3.00
   6  15   2   30.60    2.30
  -7 -15  -2   25.00    3.70
   7  15   2   18.90    3.30
  -7  15  -2   21.60    3.60
   7  15   2   25.10    2.10
   7  15   2   29.10    2.80
   8 -15   2    0.70    1.80
  -8 -15  -2    2.90    1.90
   8  15   2    3.50    1.40
   8  15   2    2.10    1.80
   8  15   2    1.70    1.40
   9 -15   2   51.29    5.10
  -9 -15  -2   57.09    5.00
   9  15   2   53.89    4.60
   9  15   2   54.09    3.90
   9  15   2   52.19    3.40
 -10 -15  -2   17.00    3.60
  10  15   2   11.60    2.00
  10  15   2   10.80    2.50
  10  15   2   11.60    1.50
 -11 -15  -2    3.00    2.10
  11 -15   2    3.00    2.10
  11  15   2    4.20    2.20
  11  15   2    2.20    0.70
  11  15   2    3.50    3.20
  11  15   2    4.60    1.30
  12  15   2   12.70    4.00
  10 -16  -2   -0.70    2.20
  10  16  -2    2.70    1.40
 -10  16   2    0.10    2.10
  10  16  -2    1.50    0.80
  -9 -16   2   -1.20    2.10
   9 -16  -2    1.00    2.30
   9  16  -2    1.40    1.50
  -9  16   2    5.70    2.40
   8 -16  -2   -0.10    2.30
  -8 -16   2    0.60    2.20
  -8  16   2   -2.00    1.90
   8  16  -2    0.10    1.40
   8  16  -2   -0.30    0.80
  -7 -16   2   25.10    4.10
   7  16  -2   24.20    2.50
   7  16  -2   28.40    3.10
  -7  16   2   27.80    3.90
  -6 -16   2   28.70    4.10
   6  16  -2   33.90    3.50
  -6  16   2   33.90    4.10
  -5 -16   2    3.10    2.10
  -5  16   2    5.00    2.30
   5  16  -2    2.20    1.70
  -4 -16   2   12.20    2.40
  -4  16   2   14.50    2.70
   4  16  -2   14.80    2.60
  -3 -16   2    3.90    2.20
  -3  16   2    2.60    2.00
   3  16  -2    3.00    1.90
  -2 -16   2    7.60    2.60
   2  16  -2    8.70    2.30
  -1 -16   2   32.10    3.50
   1 -16  -2   23.50    3.00
  -1  16   2   30.50    3.70
   0 -16  -2   88.39    5.80
   0 -16   2   92.49    6.00
   0  16  -2   75.59    6.50
   0  16   2   91.89    6.30
  -1 -16  -2  107.09    6.80
   1 -16   2  110.39    6.70
  -1  16  -2  107.79    7.50
   1  16   2   98.29    7.00
   2 -16   2   27.10    3.00
  -2  16  -2   26.00    3.90
  -3 -16  -2   56.89    5.60
   3 -16   2   56.89    4.10
  -3  16  -2   46.10    4.90
   3  16   2   50.89    4.30
  -4 -16  -2   14.50    2.90
  -4  16  -2   11.20    2.70
   4  16   2   10.40    2.10
  -5 -16  -2  123.39    7.60
   5  16   2  110.09    6.50
   5  16   2  120.89    7.30
  -5  16  -2  121.39    8.20
  -6 -16  -2   11.50    2.40
  -6  16  -2    8.00    2.50
   6  16   2   12.90    1.70
   6  16   2   12.60    2.10
   7 -16   2    2.00    2.70
  -7 -16  -2   -0.30    1.80
   7  16   2    0.40    0.80
  -7  16  -2   -1.40    2.00
   7  16   2    0.80    1.30
  -8 -16  -2  129.79    8.10
   8 -16   2  112.99    8.00
   8  16   2  123.69    6.60
  -8  16  -2  112.29    8.30
   8  16   2  121.19    7.50
   8  16   2  128.19    7.40
  -9 -16  -2   29.50    4.10
   9 -16   2   22.90    4.40
   9  16   2   26.40    2.30
   9  16   2   29.20    3.70
  -9  16  -2   18.20    3.50
   9  16   2   29.90    2.90
 -10 -16  -2   26.00    4.00
  10 -16   2   24.60    4.20
  10  16   2   24.20    2.70
 -10  16  -2   16.90    3.50
  10  16   2   24.40    2.00
   9 -17  -2   53.09    5.50
  -9 -17   2   44.10    5.10
   9  17  -2   50.09    4.00
  -9  17   2   49.70    5.10
   9  17  -2   46.80    3.20
  -8 -17   2   11.50    2.90
   8  17  -2   12.10    1.90
  -8  17   2   14.30    3.10
   8  17  -2   13.90    2.30
  -7 -17   2    2.80    2.30
   7  17  -2    4.00    1.70
   7  17  -2    1.40    1.00
  -7  17   2    4.20    2.40
   6  17  -2    2.30    1.60
  -6  17   2   -2.00    1.80
  -5 -17   2    3.30    2.00
  -5  17   2   -2.10    1.70
   5  17  -2    1.60    1.70
  -4 -17   2    2.90    2.00
   4  17  -2    0.50    1.70
  -4  17   2    2.00    2.10
  -3 -17   2   44.20    4.40
  -3  17   2   43.70    4.50
   3  17  -2   43.70    4.40
  -2 -17   2   28.30    3.60
   2  17  -2   26.30    3.70
  -2  17   2   24.00    3.60
  -1 -17   2   74.29    5.20
   1 -17  -2   63.79    4.70
  -1  17   2   66.59    5.40
   1  17  -2   54.19    5.40
   0 -17  -2  137.49    7.70
   0 -17   2  113.89    7.70
   0  17   2  136.99    8.30
   0  17  -2  112.79    8.30
   1 -17   2   41.80    3.80
  -1 -17  -2   43.50    3.80
  -1  17  -2   34.10    4.40
   1  17   2   29.10    3.70
  -2 -17  -2    6.40    1.70
   2  17   2    5.00    2.00
  -2  17  -2    2.80    2.30
   3 -17   2    3.00    1.40
  -3 -17  -2    0.80    1.60
   3  17   2   -0.40    1.50
  -3  17  -2    2.40    2.10
  -4 -17  -2   94.89    6.20
   4  17   2   82.39    5.90
  -4  17  -2   79.39    6.70
  -5 -17  -2    6.70    2.10
   5  17   2    6.30    1.20
  -5  17  -2    5.60    2.50
   5  17   2    5.10    1.70
  -6 -17  -2    1.50    1.90
  -6  17  -2   -0.40    2.00
   6  17   2    1.10    1.30
   6  17   2    0.60    0.80
  -7 -17  -2    4.70    2.20
   7  17   2    7.50    1.20
   7  17   2    8.70    1.90
  -7  17  -2    6.90    2.60
  -8 -17  -2    1.50    2.00
   8  17   2    2.10    1.50
  -8  17  -2    1.50    2.50
   8  17   2    0.90    0.90
   9 -17   2    7.30    2.50
  -9 -17  -2    6.70    2.40
   9  17   2    8.30    1.70
   9  17   2    8.10    1.90
  -9  17  -2    4.20    2.90
  -7 -18   2   12.70    3.00
   7  18  -2   11.90    2.00
   7  18  -2   14.00    2.60
  -7  18   2   13.60    3.70
  -6 -18   2   -1.40    2.00
  -6  18   2    0.30    3.20
   6  18  -2   -0.50    1.60
  -5  18   2   12.30    2.90
   5  18  -2    8.40    2.40
  -4 -18   2   58.99    5.40
   4  18  -2   60.69    5.20
  -4  18   2   63.19    5.50
  -3 -18   2    6.90    2.20
  -3  18   2    3.10    2.20
   3  18  -2    8.50    2.30
  -2 -18   2    0.80    1.80
   2  18  -2    2.70    2.00
  -2  18   2    2.80    1.90
  -1 -18   2    8.40    2.20
  -1  18   2    7.10    2.20
   1  18  -2    7.60    2.70
   0 -18   2   19.60    3.20
   0 -18  -2   16.50    2.90
   0  18   2   12.30    2.70
   0  18  -2   10.80    2.80
   1 -18   2   24.60    3.30
  -1 -18  -2   29.60    3.40
   1  18   2   26.20    3.50
  -1  18  -2   23.80    3.90
  -2 -18  -2    8.70    2.20
   2 -18   2    6.30    1.80
  -2  18  -2    4.20    2.50
   2  18   2    6.00    2.10
  -3 -18  -2   17.20    3.20
   3  18   2   14.00    2.60
  -3  18  -2   14.90    3.20
  -4 -18  -2   22.50    3.60
   4  18   2   23.50    3.10
   4  18   2   18.60    2.30
  -4  18  -2   19.00    3.60
  -5 -18  -2   -0.70    1.70
  -5  18  -2   -2.80    3.10
   5  18   2   -1.60    0.90
   5  18   2   -1.50    1.40
  -6 -18  -2    9.30    2.50
   6  18   2    7.90    2.50
   6  18   2    9.50    1.90
  -6  18  -2    8.40    3.40
  -7 -18  -2    3.60    2.20
   7  18   2    3.40    1.00
  -7  18  -2    6.10    2.60
   7  18   2    3.00    2.60
   5  19  -2   25.90    3.60
  -5  19   2   20.10    3.70
  -4 -19   2   40.10    4.60
   4  19  -2   39.00    4.40
  -4  19   2   36.80    4.40
  -3 -19   2    4.70    2.20
  -3  19   2    2.70    2.00
   3  19  -2    4.00    2.20
  -2 -19   2   38.40    4.30
  -2  19   2   34.10    4.00
   2  19  -2   31.00    4.30
  -1 -19   2   26.10    3.80
  -1  19   2   24.10    3.50
   0 -19  -2   79.59    5.50
   0 -19   2   73.69    5.60
   0  19  -2   62.49    6.20
   0  19   2   66.89    5.70
   1 -19   2    4.90    1.80
  -1  19  -2    3.90    2.30
   1  19   2    4.70    2.20
   2 -19   2   -0.50    1.30
  -2 -19  -2   -0.40    1.50
  -2  19  -2   -1.40    1.80
   2  19   2   -1.50    1.60
  -3 -19  -2   -1.40    1.50
   3  19   2   -2.00    1.40
  -3  19  -2    0.60    2.00
  -4 -19  -2   10.10    2.40
   4  19   2    8.20    2.20
   4  19   2    6.00    1.40
  -4  19  -2    3.30    2.50
  -5 -19  -2    7.40    2.30
  -5  19  -2    5.10    2.60
   5  19   2    5.90    1.30
   5  19   2    7.40    2.10
  18   0  -3   -1.30    2.20
 -18   0   3    0.50    0.90
 -18   0   3   -0.30    1.60
  18   0  -3   -0.20    3.90
  17   0  -3   66.69    8.90
  17   0  -3   66.79    6.00
 -17   0   3   69.79    5.40
 -17   0   3   65.99    4.30
  15   0  -3   87.49    8.80
 -15   0   3   72.89    6.00
 -15   0   3   83.89    4.90
  15   0  -3   86.59    6.40
  14   0  -3    1.70    1.90
  14   0  -3    1.50    2.80
  13   0  -3   -2.20    2.80
 -13   0   3    0.00    0.50
 -13   0   3   -0.20    0.90
 -12   0   3    6.60    1.40
 -11   0   3  457.55   22.10
 -11   0   3  458.75   22.60
  11   0  -3  428.16   24.10
  11   0  -3  435.96   22.80
  10   0  -3    2.70    2.10
  10   0  -3    0.60    1.30
 -10   0   3    0.00    0.40
 -10   0   3   -0.60    0.60
  -9   0   3   35.60    2.40
   9   0  -3   28.30    2.90
  -9   0   3   36.60    2.00
  -7   0   3   17.90    1.20
  -7   0   3   18.70    1.50
  -6   0   3    0.50    0.40
  -5   0   3   39.40    2.40
  -5   0   3   40.70    3.00
  -5   0   3   39.30    2.20
   5   0  -3   42.20    2.60
   5   0  -3   45.10    3.20
   5   0  -3   44.50    2.40
  -4   0   3    0.60    0.20
   4   0  -3    0.20    0.20
   4   0  -3    0.40    0.50
  -4   0   3    0.70    0.30
  -3   0   3   76.59    4.00
  -3   0   3   70.49    4.30
   3   0  -3   80.59    4.40
  -2   0   3    1.10    0.40
   2   0  -3    0.60    0.40
  -2   0   3    0.20    0.20
   2   0  -3    0.40    0.20
   1   0  -3  661.43   48.90
  -1   0   3  620.54   47.60
   0   0   3    0.60    0.10
   0   0  -3    0.90    0.20
   1   0   3   27.00    1.30
   1   0   3   24.30    1.70
  -1   0  -3   24.20    1.70
   2   0   3    0.50    0.50
  -2   0  -3    0.50    0.20
  -2   0  -3    0.50    0.40
   2   0   3    0.40    0.20
   3   0   3 1259.07   60.19
  -3   0  -3 1185.48   60.09
   4   0   3   -0.50    0.40
   4   0   3   -1.10    0.70
   4   0   3    0.20    0.20
  -4   0  -3    0.40    0.90
   4   0   3    0.50    0.20
   5   0   3 1850.01   86.49
  -5   0  -3 1658.93   86.39
  -6   0  -3    0.70    0.30
  -6   0  -3    0.40    0.30
   6   0   3    0.10    0.20
   6   0   3    0.50    0.20
   6   0   3   -0.20    0.30
   6   0   3   -0.70    1.20
  -7   0  -3  373.46   17.70
   7   0   3  359.46   17.60
   7   0   3  366.46   17.50
   7   0   3  330.07   18.90
   7   0   3  349.87   18.10
   7   0   3  357.06   17.70
  -7   0  -3  361.76   17.70
  -8   0  -3    1.40    0.50
   8   0   3    1.20    0.30
   9   0   3  681.43   35.30
   9   0   3  779.82   36.00
  -9   0  -3  705.73   35.10
   9   0   3  769.92   37.20
   9   0   3  671.53   35.00
  -9   0  -3  703.33   35.40
  10   0   3   -1.30    2.00
 -10   0  -3    0.30    0.70
  10   0   3   -0.40    0.40
  10   0   3    0.00    0.60
 -10   0  -3    0.20    0.40
  10   0   3    0.20    0.30
  11   0   3   22.10    1.40
  11   0   3   21.00    1.60
 -11   0  -3   22.10    2.00
  11   0   3   15.40    2.80
 -11   0  -3   20.90    1.40
  11   0   3   16.50    3.60
  12   0   3   13.50    1.30
 -13   0  -3   78.89    4.50
 -13   0  -3   80.39    5.20
  13   0   3   81.99    4.40
 -14   0  -3    8.70    1.90
  14   0   3    4.20    0.90
 -14   0  -3    6.10    1.10
  15   0   3   57.79    6.60
  15   0   3   67.19    3.70
 -15   0  -3   71.69    4.00
 -15   0  -3   72.39    4.70
  15   0   3   60.59    7.80
  16   0   3    7.80    4.20
 -16   0  -3    1.20    0.90
  16   0   3    1.00    0.70
  16   0   3    5.80    2.30
 -16   0  -3    2.50    1.50
 -17   0  -3  381.76   20.00
  17   0   3  371.16   24.30
  17   0   3  382.66   20.70
  18   0   3   27.70    4.90
  18   0   3   43.20    8.40
  18  -1  -3    4.90    2.70
  18  -1  -3    2.40    4.10
 -18  -1   3    7.50    2.30
 -18  -1   3    5.20    1.40
 -18   1   3    6.50    2.10
  18   1  -3    7.40    4.40
 -18   1   3    8.30    1.60
  18   1  -3    1.40    2.40
  17  -1  -3   53.49    8.30
  17  -1  -3   44.80    5.30
 -17  -1   3   45.60    3.60
 -17  -1   3   45.60    4.60
  17   1  -3   54.89    8.30
  17   1  -3   50.19    5.30
 -17   1   3   51.29    3.40
 -17   1   3   50.39    4.30
  16  -1  -3  100.49   10.20
  16  -1  -3   98.49    7.10
 -16  -1   3   81.49    5.40
 -16  -1   3   79.39    6.40
 -16   1   3   91.59    6.20
 -16   1   3   91.09    5.30
  16   1  -3   95.29    7.00
  16   1  -3   89.69    9.60
 -15  -1   3   99.99    7.00
  15  -1  -3   99.49    7.40
 -15  -1   3  101.99    6.00
  15  -1  -3  100.89    9.70
  15   1  -3  125.89    9.90
  15   1  -3  114.09    7.50
 -15   1   3  109.69    5.90
 -15   1   3   99.79    7.10
 -14  -1   3   50.99    4.20
 -14  -1   3   50.69    3.50
  14   1  -3   59.09    6.80
 -14   1   3   55.39    4.00
  14   1  -3   55.09    4.80
 -14   1   3   55.69    3.30
 -13  -1   3   31.30    3.00
 -13  -1   3   32.60    2.30
  13  -1  -3   26.90    5.00
 -13   1   3   32.40    2.10
  13   1  -3   29.00    4.90
 -13   1   3   31.10    2.70
  12   1  -3   22.60    3.60
 -12   1   3   13.80    2.00
  12   1  -3   30.00    5.40
 -12   1   3   18.90    1.80
  11  -1  -3   45.60    3.90
  11  -1  -3   49.00    5.50
  11   1  -3   36.10    3.80
  11   1  -3   40.20    5.20
 -10  -1   3  158.98    8.20
  10  -1  -3  155.68   10.10
  10  -1  -3  157.18    8.90
 -10  -1   3  160.98    8.70
  10   1  -3  169.98   10.10
 -10   1   3  156.58    8.50
 -10   1   3  150.18    8.00
  10   1  -3  162.58    9.70
   9  -1  -3    6.70    2.10
  -9  -1   3    6.00    0.80
  -9  -1   3    5.80    1.10
  -9   1   3    5.90    0.70
  -9   1   3    5.90    1.00
   9   1  -3    4.50    1.40
   9   1  -3    3.80    1.80
   8  -1  -3   43.00    4.30
  -8  -1   3   34.70    2.20
   8  -1  -3   44.90    3.30
  -8  -1   3   33.90    2.60
  -8   1   3   35.40    2.10
   8   1  -3   44.90    3.20
  -8   1   3   36.70    2.50
   7  -1  -3  606.34   29.30
  -7  -1   3  589.84   29.30
   7  -1  -3  546.85   30.00
  -7  -1   3  582.44   28.90
  -7   1   3  574.74   29.10
   7   1  -3  629.44   29.30
   7   1  -3  622.54   30.10
  -7   1   3  562.24   28.80
   6  -1  -3  153.68    8.10
   6  -1  -3  153.68    8.80
  -6  -1   3  145.79    7.60
   6  -1  -3  151.48    7.90
  -6   1   3  149.29    7.90
   6   1  -3  156.38    7.90
   6   1  -3  155.68    8.00
   5  -1  -3    9.30    0.90
  -5  -1   3    9.00    1.50
  -5  -1   3   10.20    0.90
  -5  -1   3   10.40    0.70
  -5   1   3   11.70    0.90
  -5   1   3    7.90    1.40
   5   1  -3    9.10    1.10
   5   1  -3    8.80    1.50
   5   1  -3   11.80    0.90
   4  -1  -3    1.70    0.80
   4  -1  -3    2.50    0.40
  -4  -1   3    1.50    0.40
  -4  -1   3    2.10    0.70
  -4  -1   3    2.00    0.30
   4  -1  -3    2.00    0.60
  -4   1   3    1.10    0.60
  -4   1   3    2.40    0.40
   4   1  -3    2.50    0.40
   4   1  -3    1.80    0.70
   3  -1  -3  327.07   15.70
  -3  -1   3  294.37   15.20
   3  -1  -3  302.27   15.20
  -3  -1   3  293.07   15.50
   3   1  -3  313.57   15.20
   3   1  -3  320.37   15.50
  -3   1   3  288.67   15.20
  -3   1   3  317.97   15.60
  -2  -1   3   80.99    4.50
   2  -1  -3   81.39    4.30
  -2  -1   3   81.89    4.30
   2  -1  -3   78.79    4.20
   2  -1  -3   98.09    4.80
  -2   1   3   81.29    4.30
  -2   1   3   89.89    4.70
   2   1  -3   86.89    4.30
  -2   1   3   81.09    4.20
   2   1  -3   81.09    4.50
   1  -1  -3   36.70    1.90
  -1  -1   3   37.20    2.00
   1   1  -3   40.00    2.00
  -1   1   3   37.10    2.00
  -1   1   3   35.60    1.90
   1   1  -3   39.40    1.90
   0  -1   3   46.30    2.40
   0  -1   3   47.50    2.40
   0  -1  -3   44.30    2.40
   0   1  -3   45.30    2.40
   0   1   3   44.60    2.40
   0   1  -3   47.30    2.40
   1  -1   3   30.70    1.80
   1  -1   3   31.10    2.00
  -1  -1  -3   34.00    1.80
   1  -1   3   33.40    1.70
   1   1   3   33.90    1.80
  -1   1  -3   35.30    1.70
  -1   1  -3   30.40    1.70
   1   1   3   36.10    2.30
  -1   1  -3   30.70    2.00
  -2  -1  -3  504.25   23.30
   2  -1   3  457.25   23.20
   2   1   3  409.76   22.70
  -2   1  -3  432.96   23.10
   2   1   3  518.25   23.30
   3  -1   3   75.79    4.00
   3  -1   3   70.99    4.60
  -3  -1  -3   79.69    4.00
  -3  -1  -3   75.99    4.00
  -3   1  -3   70.59    3.90
   3   1   3   89.29    4.00
   3   1   3   84.09    3.90
  -3   1  -3   64.99    4.50
   4  -1   3   41.50    2.50
  -4  -1  -3   36.10    2.10
   4  -1   3   40.30    2.10
  -4  -1  -3   33.70    2.90
  -4  -1  -3   37.50    2.10
  -4   1  -3   32.30    3.10
   4   1   3   39.10    2.00
   4   1   3   38.60    2.40
  -4   1  -3   36.90    1.90
   4   1   3   40.40    2.10
  -4   1  -3   35.30    2.10
   4   1   3   44.60    3.20
   5  -1   3   33.20    1.80
   5  -1   3   32.00    1.90
  -5  -1  -3   34.40    2.00
   5  -1   3   25.50    3.20
   5   1   3   34.80    1.80
   5   1   3   32.50    1.70
  -5   1  -3   33.60    1.80
   5   1   3   32.60    1.90
   6  -1   3   17.80    2.70
   6  -1   3   20.70    2.00
   6  -1   3   21.50    1.40
   6  -1   3   21.50    1.20
  -6  -1  -3   21.70    1.50
  -6  -1  -3   21.70    1.40
   6   1   3   17.40    2.70
   6   1   3   18.20    1.90
   6   1   3   21.90    1.30
   6   1   3   20.40    1.20
  -6   1  -3   20.50    1.30
   6   1   3   19.30    1.30
  -6   1  -3   20.90    1.30
   7  -1   3   34.60    2.20
  -7  -1  -3   37.40    2.30
  -7  -1  -3   35.10    2.10
   7  -1   3   29.00    3.60
   7  -1   3   36.40    2.00
   7  -1   3   34.60    2.80
  -7   1  -3   34.80    2.10
   7   1   3   37.10    2.10
   7   1   3   39.30    3.80
   7   1   3   36.40    1.90
   7   1   3   38.20    2.80
   7   1   3   36.60    2.10
  -7   1  -3   38.90    2.10
   8  -1   3    0.20    0.60
   8  -1   3   -0.70    1.80
   8  -1   3    1.30    0.30
  -8  -1  -3    1.20    0.40
  -8  -1  -3    0.10    0.70
  -8   1  -3    1.50    0.50
   8   1   3    2.10    1.70
   8   1   3    0.60    0.50
   8   1   3    0.60    0.30
   8   1   3    1.70    1.10
   9  -1   3  610.54   30.90
   9  -1   3  623.24   31.40
   9  -1   3  608.54   32.50
  -9  -1  -3  635.44   31.10
   9  -1   3  613.24   30.70
  -9  -1  -3  621.64   30.70
   9   1   3  637.84   30.80
   9   1   3  626.04   30.80
  -9   1  -3  631.64   30.90
   9   1   3  632.84   30.60
   9   1   3  627.84   32.60
  -9   1  -3  622.14   30.60
   9   1   3  659.33   31.50
  10  -1   3    1.80    0.40
 -10  -1  -3    1.60    1.00
 -10  -1  -3    1.80    0.70
  10  -1   3    1.30    2.10
 -10   1  -3    1.70    0.60
  10   1   3    1.30    0.30
  10   1   3    1.00    1.30
  10   1   3    1.50    0.60
  10   1   3    0.10    2.10
  11  -1   3    3.80    0.70
  11  -1   3    1.90    2.60
 -11  -1  -3    5.00    1.20
 -11   1  -3    5.60    0.70
  11   1   3    5.00    0.60
  11   1   3    2.30    2.30
  11   1   3    5.10    0.80
 -12  -1  -3   33.90    3.20
 -12  -1  -3   33.70    2.50
  12   1   3   45.00    4.10
  12   1   3   41.10    2.60
  12   1   3   38.90    2.20
  13  -1   3  413.76   23.40
 -13  -1  -3  399.56   20.50
  13  -1   3  387.16   20.30
 -13  -1  -3  407.06   21.10
  13  -1   3  401.06   21.60
  13   1   3  427.36   20.60
  13   1   3  430.06   20.30
 -13   1  -3  421.76   20.90
  13   1   3  407.16   21.60
  13   1   3  421.76   23.60
 -13   1  -3  412.36   20.40
  14  -1   3   36.00    2.40
 -14  -1  -3   29.30    2.60
 -14  -1  -3   32.90    3.50
  14   1   3   38.50    2.30
 -14   1  -3   37.80    3.00
 -14   1  -3   32.90    2.30
 -15  -1  -3    6.20    1.70
  15  -1   3   -2.60    3.00
 -15  -1  -3    3.60    1.00
  15  -1   3   -3.00    2.70
  15   1   3    5.70    3.40
 -15   1  -3    1.30    1.20
 -15   1  -3    0.30    0.60
  15   1   3    2.80    2.50
  15   1   3    1.50    0.60
 -16  -1  -3   46.20    3.40
 -16  -1  -3   50.29    4.20
  16  -1   3   57.49    7.80
  16  -1   3   55.69    5.30
  16   1   3   53.39    5.40
 -16   1  -3   53.39    3.90
  16   1   3   51.99    7.90
  16   1   3   44.30    2.90
 -16   1  -3   49.10    3.10
  17  -1   3   50.49    8.30
  17  -1   3   39.70    5.10
  18  -1   3   32.70    4.90
  18  -1   3   34.70    7.60
  18   1   3   27.10    4.80
  18   1   3   21.00    5.50
  18  -2  -3   -3.30    4.00
 -18  -2   3    3.40    2.30
  18  -2  -3   -0.60    2.40
  18   2  -3    4.00    4.30
 -18   2   3    4.30    1.70
 -18   2   3    3.10    1.00
  18   2  -3   -1.70    2.40
  17  -2  -3    9.90    2.90
  17  -2  -3   13.30    5.00
 -17  -2   3   10.30    2.80
 -17  -2   3    8.80    1.70
 -17   2   3   13.80    1.80
 -17   2   3   11.30    2.30
  17   2  -3   16.50    4.80
  16   2  -3   28.80    4.60
  15   2  -3   12.20    4.10
 -15   2   3   13.20    1.50
  15   2  -3   17.90    3.80
  14  -2  -3   79.19    8.50
 -14  -2   3   81.09    5.00
 -14  -2   3   78.79    5.90
  14  -2  -3   80.19    6.30
 -14   2   3   92.59    5.40
  14   2  -3   87.19    6.20
  14   2  -3   95.89    8.40
 -14   2   3   92.29    4.80
 -13  -2   3   -0.60    1.10
  13  -2  -3    2.10    2.90
  13  -2  -3    0.10    1.70
 -13  -2   3   -0.90    0.60
 -13   2   3    0.20    0.50
  13   2  -3   -2.20    1.60
 -13   2   3    0.10    0.80
  13   2  -3    0.30    2.60
  12  -2  -3  297.57   16.80
 -12  -2   3  314.57   16.00
 -12  -2   3  316.07   16.80
 -12   2   3  326.17   15.90
  12   2  -3  319.07   16.80
  12   2  -3  313.77   18.20
 -12   2   3  323.27   16.30
 -11  -2   3   82.09    5.60
  11  -2  -3   98.19    7.70
 -11  -2   3   82.89    4.90
  11  -2  -3   93.79    6.00
  11   2  -3   93.19    5.90
 -11   2   3   84.69    4.70
  11   2  -3   94.59    7.30
 -11   2   3   85.39    5.20
 -10   2   3   40.80    2.40
  10   2  -3   39.10    4.60
 -10   2   3   44.80    2.90
  -9  -2   3  147.69    7.40
   9  -2  -3  136.69    9.10
  -9  -2   3  141.99    7.90
   9  -2  -3  141.99    8.10
   9   2  -3  139.09    8.80
  -9   2   3  143.99    7.20
   9   2  -3  141.19    7.90
  -9   2   3  145.89    7.60
   8  -2  -3  227.08   13.50
  -8  -2   3  242.68   12.10
   8  -2  -3  239.28   12.60
  -8  -2   3  233.28   12.50
   8   2  -3  241.28   13.40
   8   2  -3  255.77   12.50
  -8   2   3  240.68   12.20
  -8   2   3  237.58   11.90
  -7  -2   3   59.09    3.40
   7  -2  -3   57.99    4.80
   7  -2  -3   63.69    4.00
  -7  -2   3   56.19    3.80
   7   2  -3   69.29    3.90
  -7   2   3   59.59    3.50
   7   2  -3   71.99    4.80
   6  -2  -3  456.05   23.80
  -6  -2   3  458.75   23.10
   6  -2  -3  464.05   23.10
  -6  -2   3  458.55   22.70
   6   2  -3  466.25   23.00
   6   2  -3  471.45   23.70
  -5  -2   3  333.27   16.20
  -5  -2   3  313.57   16.90
   5  -2  -3  333.97   17.20
   5  -2  -3  341.57   16.50
  -5  -2   3  326.87   16.50
   5   2  -3  337.77   16.40
  -5   2   3  317.37   16.30
   5   2  -3  326.77   16.90
   5   2  -3  351.56   16.40
  -5   2   3  294.17   16.90
  -4  -2   3  158.38    8.90
   4  -2  -3  168.48    8.60
  -4  -2   3  174.88    8.30
   4  -2  -3  162.98    9.10
  -4  -2   3  175.68    8.60
  -4   2   3  170.68    8.40
   4   2  -3  162.58    8.80
  -4   2   3  157.38    8.30
  -4   2   3  147.59    8.90
   4   2  -3  186.08    8.50
  -3  -2   3    4.50    0.90
   3  -2  -3    7.30    1.30
  -3  -2   3    4.70    0.60
  -3   2   3    5.20    0.50
  -3   2   3    5.10    1.00
   3   2  -3    5.80    1.00
  -3   2   3    4.80    0.50
   3   2  -3    6.70    0.60
  -2  -2   3  313.17   14.80
   2  -2  -3  271.97   14.60
  -2  -2   3  280.67   14.80
  -2   2   3  322.07   15.10
   2   2  -3  282.07   14.80
   2   2  -3  329.97   14.80
  -2   2   3  282.67   14.60
  -1  -2   3  114.09    5.70
   1  -2  -3  102.39    5.50
  -1   2   3  103.89    5.50
   1   2  -3  120.89    5.70
   0  -2   3  176.28    8.80
   0  -2  -3  167.38    8.70
   0   2   3  164.78    8.60
   0   2  -3  189.08    8.70
   1  -2   3   66.59    3.60
   1  -2   3   61.39    3.70
  -1  -2  -3   78.99    3.60
   1   2   3   75.09    3.60
  -1   2  -3   72.09    3.60
  -1   2  -3   58.39    3.70
   2  -2   3  120.59    6.60
  -2  -2  -3  132.29    6.80
  -2  -2  -3  115.49    6.20
  -2   2  -3  112.49    6.50
   2   2   3  134.99    6.80
   2   2   3  119.39    6.10
  -2   2  -3  124.79    6.20
   2   2   3  131.19    6.30
  -2   2  -3  108.19    6.10
  -3  -2  -3  150.38    7.60
  -3  -2  -3  144.89    8.20
   3  -2   3  145.69    8.00
  -3  -2  -3  147.59    7.50
   3   2   3  157.08    7.50
   3   2   3  154.88    8.20
  -3   2  -3  150.28    7.50
  -3   2  -3  137.59    8.00
   3   2   3  149.19    7.40
  -4  -2  -3   20.20    1.40
   4  -2   3   20.80    1.20
   4  -2   3   19.50    1.60
  -4  -2  -3   18.20    2.10
  -4  -2  -3   18.80    1.30
   4  -2   3   19.80    2.20
   4   2   3   19.60    1.20
   4   2   3   19.70    1.10
   4   2   3   20.70    1.30
   4   2   3   23.10    2.40
   4   2   3   21.00    1.60
  -4   2  -3   21.20    1.30
  -4   2  -3   19.50    2.30
   5  -2   3  309.97   15.00
  -5  -2  -3  281.47   14.40
  -5  -2  -3  291.47   14.50
   5  -2   3  291.27   14.20
  -5  -2  -3  274.07   15.50
   5  -2   3  291.57   15.30
  -5   2  -3  280.77   14.30
   5   2   3  325.07   15.60
  -5   2  -3  285.17   14.20
   5   2   3  264.77   14.20
   5   2   3  304.57   14.90
   5   2   3  311.67   14.40
   5   2   3  276.97   14.30
  -5   2  -3  266.77   15.40
   6  -2   3  175.38    8.60
  -6  -2  -3  169.48    8.90
   6  -2   3  169.78    9.10
   6  -2   3  164.88    9.90
  -6  -2  -3  173.08    8.70
   6   2   3  179.28    8.70
   6   2   3  170.28    8.70
   6   2   3  178.18   10.10
   6   2   3  177.28    9.10
  -6   2  -3  169.18    8.70
   6   2   3  164.68    8.50
  -6   2  -3  175.38    8.60
   7  -2   3  100.09    7.30
   7  -2   3  106.19    6.40
  -7  -2  -3  121.09    6.10
  -7  -2  -3  119.89    6.30
  -7  -2  -3  118.09    5.90
   7  -2   3  114.69    5.90
   7   2   3  118.39    6.00
   7   2   3  124.79    6.00
  -7   2  -3  113.49    5.90
  -7   2  -3  109.79    5.90
   7   2   3  125.09    6.00
  -8  -2  -3  599.74   29.10
  -8  -2  -3  598.74   29.50
   8  -2   3  598.74   29.70
   8  -2   3  597.24   29.00
   8  -2   3  542.15   30.50
   8   2   3  611.14   29.70
   8   2   3  600.04   29.10
   8   2   3  580.94   28.90
   8   2   3  580.54   30.80
  -8   2  -3  609.74   29.10
   8   2   3  596.54   29.10
   9  -2   3    8.80    1.10
  -9  -2  -3   10.60    1.90
  -9   2  -3   12.40    1.10
   9   2   3    9.40    0.80
   9   2   3    8.80    1.00
   9   2   3    8.70    1.00
  10  -2   3   29.50    1.80
 -10  -2  -3   27.40    2.40
  10  -2   3   21.50    4.50
 -10  -2  -3   28.70    1.90
  10   2   3   20.60    4.20
 -10   2  -3   32.10    2.00
  10   2   3   31.10    1.60
  10   2   3   22.70    2.90
  10   2   3   29.60    1.90
 -10   2  -3   30.80    1.70
 -11  -2  -3   12.90    1.30
 -11  -2  -3   11.20    1.70
  11  -2   3    8.40    2.00
  11  -2   3    9.20    3.00
  11  -2   3   10.40    1.10
  11   2   3   12.40    0.90
  11   2   3   10.10    2.40
  11   2   3   11.10    1.10
 -11   2  -3   13.10    0.90
  11   2   3   10.60    3.00
  12  -2   3   90.49    5.10
 -12  -2  -3   93.89    5.30
 -12  -2  -3   93.59    6.00
  12  -2   3   96.39    6.40
 -12   2  -3   94.69    5.00
  12   2   3  103.59    6.50
  12   2   3   98.59    4.90
 -12   2  -3   95.99    5.40
  12   2   3   99.29    5.20
  13  -2   3   97.49    6.80
  13  -2   3  108.89    8.90
 -13  -2  -3  102.99    6.30
 -13  -2  -3  102.99    5.50
  13   2   3  100.29    5.40
  13   2   3   96.29    5.10
 -13   2  -3   80.19    5.50
  14  -2   3  164.08    9.40
  14  -2   3  183.58   11.00
 -14  -2  -3  173.48    9.60
 -14  -2  -3  178.98   10.40
  14  -2   3  186.38   13.20
 -14   2  -3  196.28   10.00
  14   2   3  187.68   10.90
  14   2   3  188.48    9.60
  14   2   3  201.88   13.00
  14   2   3  188.58    9.30
 -14   2  -3  187.48    9.40
  15  -2   3   32.60    5.70
 -15  -2  -3   34.90    2.60
 -15  -2  -3   34.60    3.40
  15   2   3   32.60    5.70
 -15   2  -3   37.10    2.30
  15   2   3   23.10    6.00
  15   2   3   38.80    2.20
 -15   2  -3   39.80    3.00
 -16  -2  -3   57.79    5.00
  16  -2   3   75.69    6.00
  16  -2   3   83.19    9.10
  16  -2   3   68.59    4.50
 -16  -2  -3   62.29    5.10
  16   2   3   62.19    5.70
  16   2   3   59.99    8.20
 -16   2  -3   69.69    4.50
 -16   2  -3   68.59    3.80
  16   2   3   56.99    3.70
  17  -2   3   54.49   10.00
  17  -2   3   49.80    5.50
  17   2   3   44.30    5.50
  17   2   3   56.69    8.30
  18  -2   3   76.69    9.50
  18   2   3   78.89    9.50
  18  -3  -3   -0.10    4.50
  18   3  -3    4.90    4.00
 -17  -3   3    2.30    2.30
  17  -3  -3    6.40    5.00
  17  -3  -3    4.20    2.50
  17   3  -3    3.90    2.50
 -17   3   3    1.00    1.20
  17   3  -3    6.60    3.90
  16  -3  -3  155.58   10.10
 -16  -3   3  147.29   10.00
  16  -3  -3  143.49   13.00
 -16  -3   3  158.98    8.90
 -16   3   3  165.48    9.20
 -16   3   3  174.08    8.40
  16   3  -3  152.18   10.00
  16   3  -3  165.28   14.00
  15   3  -3    2.10    2.20
  15   3  -3    1.80    3.50
  14  -3  -3    8.60    2.40
  14  -3  -3   13.20    4.20
 -14  -3   3    6.50    1.40
 -14   3   3    9.30    1.20
  14   3  -3   10.00    2.40
 -14   3   3    9.10    1.70
  14   3  -3   10.50    3.60
 -13  -3   3   61.79    4.90
  13  -3  -3   70.29    7.40
 -13  -3   3   65.19    4.00
  13  -3  -3   65.69    5.30
 -13   3   3   65.59    3.60
  13   3  -3   68.99    6.80
  13   3  -3   54.99    5.10
 -13   3   3   65.89    4.20
 -12  -3   3   23.50    2.40
 -12  -3   3   21.10    3.20
  12  -3  -3   40.50    5.90
 -12   3   3   30.80    1.90
 -12   3   3   29.70    2.40
  11  -3  -3   83.19    5.70
 -11  -3   3   71.29    5.00
  11   3  -3   90.49    7.20
  11   3  -3   90.89    5.80
  10  -3  -3  136.39    7.80
 -10  -3   3  129.49    7.00
  10  -3  -3  133.89    9.10
 -10  -3   3  128.19    7.60
 -10   3   3  127.99    6.70
 -10   3   3  130.79    7.10
  10   3  -3  132.19    8.70
  -9  -3   3    6.60    1.00
  -8  -3   3    2.30    0.60
  -8  -3   3    2.30    1.00
   8  -3  -3   -1.60    1.50
   8  -3  -3   -0.10    1.00
  -8   3   3    0.90    0.60
   8   3  -3    0.60    1.70
   8   3  -3   -0.10    1.10
  -7  -3   3   72.59    4.50
  -7  -3   3   71.99    3.90
   7  -3  -3   85.79    5.70
   7   3  -3   66.89    4.30
   7   3  -3   70.59    5.10
  -7   3   3   70.29    4.00
  -6  -3   3   41.80    2.80
  -6  -3   3   40.60    2.30
   6  -3  -3   38.50    3.60
   6  -3  -3   39.40    2.80
   6   3  -3   39.40    3.30
  -6   3   3   37.70    2.40
   6   3  -3   40.10    2.60
  -5  -3   3  338.87   16.50
   5  -3  -3  354.76   18.00
   5  -3  -3  333.27   16.70
  -5  -3   3  310.07   17.20
   5   3  -3  377.16   16.90
  -5   3   3  331.67   16.60
   5   3  -3  321.27   17.10
   5   3  -3  307.37   16.30
   5   3  -3  319.97   16.60
  -4  -3   3  911.91   43.70
   4  -3  -3  902.01   43.60
  -4  -3   3  846.62   43.90
   4  -3  -3  961.90   44.30
   4   3  -3  998.90   43.50
  -4   3   3  846.22   43.30
  -4   3   3  798.72   43.90
   4   3  -3  841.52   43.30
   4   3  -3  877.11   43.80
   3  -3  -3  156.28    8.20
  -3  -3   3  154.78    8.40
  -3  -3   3  160.58    8.10
  -3  -3   3  166.28    8.40
   3  -3  -3  162.68    8.80
  -3   3   3  153.18    8.10
   3   3  -3  160.98    8.40
   3   3  -3  172.08    8.40
  -2  -3   3    6.40    0.80
   2   3  -3    6.50    0.70
  -2   3   3    6.30    0.70
  -2   3   3    6.90    1.20
   1  -3  -3  848.32   44.90
  -1  -3   3  948.41   45.10
  -1   3   3  884.81   44.80
   1   3  -3  993.30   45.00
   0  -3  -3 1916.01  115.79
   0   3  -3 1986.40  118.59
   0   3   3 1780.22  112.29
   1  -3   3   31.50    2.10
   1   3   3   40.70    2.00
  -1   3  -3   33.00    2.10
  -2  -3  -3  422.76   20.60
  -2  -3  -3  466.75   21.30
   2  -3   3  386.46   20.80
  -2   3  -3  381.56   20.80
   2   3   3  413.56   20.50
  -2   3  -3  394.46   20.60
   2   3   3  460.75   20.80
  -3  -3  -3    2.50    1.20
  -3  -3  -3    2.90    0.70
  -3  -3  -3    4.00    0.70
   3   3   3    2.80    0.40
   3   3   3    2.30    1.10
  -3   3  -3    2.80    0.60
   3   3   3    3.00    0.60
   3   3   3    2.40    0.30
   4  -3   3  484.55   23.40
  -4  -3  -3  471.65   23.80
   4  -3   3  470.05   24.20
   4  -3   3  501.55   23.70
  -4  -3  -3  445.76   24.40
  -4  -3  -3  452.95   23.60
   4   3   3  446.96   23.30
   4   3   3  462.65   23.50
   4   3   3  486.05   23.80
  -4   3  -3  493.15   23.50
   4   3   3  487.95   23.60
   4   3   3  496.95   24.50
  -4   3  -3  514.75   24.70
  -5  -3  -3  159.58    8.30
  -5  -3  -3  151.88    8.10
   5  -3   3  161.08    8.90
   5  -3   3  164.18    7.90
   5   3   3  154.88    8.30
   5   3   3  155.18    8.00
   5   3   3  149.49    7.80
   5   3   3  153.58    9.10
   5   3   3  168.08    8.10
  -5   3  -3  159.68    8.00
  -5   3  -3  156.48    9.00
  -6  -3  -3  224.98   11.50
  -6  -3  -3  209.58   11.20
   6  -3   3  207.58   12.20
  -6  -3  -3  221.78   11.00
   6  -3   3  222.38   11.40
   6  -3   3  247.18   11.10
   6   3   3  213.38   11.50
  -6   3  -3  220.58   11.10
   6   3   3  221.98   11.10
  -6   3  -3  224.58   11.00
   6   3   3  217.18   12.40
  -7  -3  -3  341.97   16.80
   7  -3   3  334.37   16.30
  -7  -3  -3  328.07   16.40
   7  -3   3  331.67   16.80
   7  -3   3  314.27   17.60
   7   3   3  315.67   16.20
   7   3   3  313.17   16.50
   7   3   3  333.07   17.90
  -7   3  -3  327.47   16.30
   7   3   3  355.66   16.50
   7   3   3  333.87   16.90
   8  -3   3   16.60    1.30
   8  -3   3   14.10    2.40
  -8  -3  -3   17.00    1.90
  -8  -3  -3   17.30    2.00
   8  -3   3   18.00    3.50
   8   3   3   17.60    3.40
   8   3   3   17.30    2.40
   8   3   3   16.10    1.20
  -8   3  -3   13.70    1.20
   8   3   3   15.00    1.00
   8   3   3   15.20    1.20
  -9  -3  -3   29.50    2.70
   9  -3   3   31.40    3.30
   9  -3   3   26.90    4.50
  -9  -3  -3   27.50    2.00
   9  -3   3   28.70    1.90
  -9   3  -3   28.20    1.60
   9   3   3   29.40    1.70
  -9   3  -3   29.10    1.90
   9   3   3   31.40    3.10
   9   3   3   34.30    4.20
   9   3   3   28.80    1.90
 -11  -3  -3   69.69    4.30
 -11  -3  -3   66.49    3.60
  11  -3   3   55.59    3.50
  11  -3   3   51.19    4.60
  11   3   3   63.79    3.50
 -11   3  -3   61.49    3.30
  11   3   3   61.69    3.20
  11   3   3   66.69    6.20
 -11   3  -3   61.89    3.70
  11   3   3   65.39    4.60
  12  -3   3  149.99    9.40
  12  -3   3  151.08   12.80
 -12  -3  -3  161.88    8.40
 -12  -3  -3  162.78    9.20
  12  -3   3  143.49    8.20
 -12   3  -3  166.78    8.10
  12   3   3  163.78    8.30
  12   3   3  169.58    9.50
 -12   3  -3  165.28    8.50
  12   3   3  170.98    8.10
  13  -3   3   63.99    3.90
 -13  -3  -3   64.89    5.10
 -13  -3  -3   58.69    4.10
 -13   3  -3   66.99    4.10
 -13   3  -3   64.19    3.60
  13   3   3   72.39    3.90
  13   3   3   70.39    3.60
  13   3   3   85.29    7.70
 -14  -3  -3   22.00    2.20
  14  -3   3   15.50    3.80
  14  -3   3   18.90    4.50
 -14   3  -3   16.80    1.90
  14   3   3   18.20    1.40
 -14   3  -3   15.60    1.40
  14   3   3   19.90    1.70
  15  -3   3    7.70    4.10
 -15  -3  -3   12.00    2.50
 -15  -3  -3   12.60    2.40
  15  -3   3   14.90    2.20
  15  -3   3    6.20    4.40
 -15   3  -3   13.70    1.80
  15   3   3   13.70    1.60
  15   3   3   14.90    1.20
  15   3   3   11.20    4.00
 -15   3  -3   16.00    1.30
  16  -3   3   36.80    7.40
  16  -3   3   38.70    4.80
 -16   3  -3   32.80    2.30
 -16   3  -3   35.60    2.90
  17  -3   3   39.60    5.10
  17   3   3   52.09    8.00
  17   3   3   37.20    5.20
 -17  -4   3    7.20    1.80
  17  -4  -3    4.60    2.60
 -17  -4   3    6.40    2.70
 -17   4   3    9.30    1.40
  17   4  -3    6.30    4.40
 -17   4   3   10.20    1.90
 -16  -4   3   11.50    3.40
  16  -4  -3   21.90    4.30
  16  -4  -3   17.70    5.20
  16   4  -3   20.10    4.90
 -16   4   3   17.90    2.40
 -16   4   3   17.80    1.70
  16   4  -3   25.70    4.40
  15  -4  -3  109.39   10.50
 -15  -4   3  109.99    6.60
 -15  -4   3  107.79    7.70
  15  -4  -3  108.39    7.90
 -15   4   3  117.49    6.10
 -15   4   3  109.99    6.60
  15   4  -3  116.29    7.70
  15   4  -3  124.09   10.00
 -14  -4   3    1.00    0.90
 -14  -4   3    1.10    1.70
  14  -4  -3    1.50    2.10
  14  -4  -3    3.20    3.70
 -14   4   3    0.10    0.90
  14   4  -3    3.10    2.80
  14   4  -3    2.50    2.00
 -14   4   3    0.70    0.60
  13  -4  -3   11.00    3.60
 -13  -4   3    1.30    1.00
 -13  -4   3    3.00    1.80
  13   4  -3    2.10    1.90
 -13   4   3    3.00    0.60
  13   4  -3    5.00    2.90
 -13   4   3    2.60    1.10
 -12  -4   3   32.10    2.70
 -12  -4   3   32.10    3.60
 -12   4   3   31.70    2.60
  12   4  -3   34.10    5.80
  12   4  -3   34.90    4.10
 -12   4   3   33.70    2.10
  11  -4  -3  180.88   11.40
  11  -4  -3  174.28    9.60
 -11  -4   3  161.38    8.70
 -11  -4   3  156.68    9.50
  11   4  -3  156.48    9.30
  11   4  -3  148.79   10.70
 -11   4   3  166.18    8.30
 -11   4   3  164.58    8.70
  10  -4  -3   64.29    4.60
  10  -4  -3   59.99    6.00
 -10  -4   3   59.59    4.40
 -10  -4   3   57.69    3.60
  10   4  -3   61.89    5.90
 -10   4   3   58.79    3.60
  10   4  -3   57.59    5.40
  -9  -4   3  469.35   22.80
   9  -4  -3  435.06   24.50
  -9  -4   3  468.45   23.60
  -9   4   3  448.66   22.50
   9   4  -3  459.15   24.10
   9   4  -3  464.25   23.10
  -9   4   3  463.45   22.90
  -8  -4   3  567.14   27.30
   8  -4  -3  531.05   27.00
  -8  -4   3  564.04   26.60
   8  -4  -3  525.05   28.10
   8   4  -3  549.85   26.90
  -8   4   3  468.65   26.40
  -8   4   3  558.74   26.70
   8   4  -3  537.85   27.70
  -7  -4   3  107.29    5.70
  -7  -4   3  107.59    6.30
   7   4  -3  104.49    5.90
   7   4  -3  102.19    6.70
   7   4  -3  101.09    5.40
  -7   4   3  117.59    5.80
  -6  -4   3  178.68   10.50
   6  -4  -3  163.78   10.40
  -6  -4   3  180.08    9.10
  -6  -4   3  179.28    9.60
   6  -4  -3  174.78    9.40
  -6   4   3  173.68    9.10
   6   4  -3  189.18    9.90
   6   4  -3  190.48    9.20
   6   4  -3  167.28    8.90
   5  -4  -3  266.67   13.40
  -5  -4   3  254.87   13.90
   5  -4  -3  279.57   14.90
  -5  -4   3  264.17   13.60
  -5  -4   3  272.17   13.10
   5   4  -3  270.77   13.20
  -5   4   3  243.38   13.20
   5   4  -3  248.08   13.00
   5   4  -3  263.97   13.70
  -4  -4   3  198.38    9.60
  -4  -4   3  185.28   10.20
   4  -4  -3  196.18   10.60
  -4   4   3  184.88    9.70
  -4   4   3  173.88   10.20
   4   4  -3  185.38    9.60
   4   4  -3  214.48    9.90
   4   4  -3  186.08   10.00
  -3  -4   3  625.24   30.70
   3  -4  -3  601.44   30.40
  -3  -4   3  636.74   30.20
  -3   4   3  588.54   30.30
  -3   4   3  591.14   30.70
   3   4  -3  653.23   30.50
   2  -4  -3   30.60    2.20
  -2  -4   3   34.90    1.90
  -2  -4   3   35.00    2.30
  -2   4   3   32.10    2.00
  -2   4   3   29.90    2.40
   2   4  -3   34.50    2.10
  -1  -4   3    8.80    1.10
  -1  -4   3    9.40    0.90
   1   4  -3   11.50    1.00
  -1   4   3   10.50    0.90
   0  -4  -3   27.40    2.00
   0  -4   3   33.30    2.20
   0  -4  -3   33.80    1.90
   0   4   3   29.40    2.00
   0   4  -3   34.30    2.10
   1  -4   3 1045.90   52.79
  -1   4  -3 1107.99   52.69
  -2  -4  -3  152.48    7.90
   2  -4   3  157.38    7.70
  -2  -4  -3  162.58    7.90
   2   4   3  157.88    8.50
   2   4   3  160.98    7.90
  -2   4  -3  139.89    8.00
   2   4   3  158.88    8.10
   2   4   3  144.89    7.60
   3  -4   3  816.22   39.10
  -3  -4  -3  844.92   40.50
   3  -4   3  792.32   39.60
  -3  -4  -3  786.52   39.30
  -3  -4  -3  807.02   39.20
  -3   4  -3  805.82   39.70
   3   4   3  781.42   39.90
  -3   4  -3  760.62   39.40
   3   4   3  809.52   39.20
   3   4   3  809.52   39.50
   4  -4   3  861.71   40.20
   4  -4   3  815.42   40.30
  -4  -4  -3  780.12   41.10
  -4  -4  -3  814.42   40.60
  -4  -4  -3  809.72   40.30
   4  -4   3  813.62   40.80
  -4  -4  -3  812.42   40.20
   4   4   3  838.72   40.20
  -4   4  -3  821.32   40.90
   4   4   3  819.72   41.10
   4   4   3  818.82   40.40
   4   4   3  847.72   40.60
  -5  -4  -3   58.19    3.70
   5  -4   3   65.29    4.30
  -5  -4  -3   56.89    3.20
   5  -4   3   58.39    3.10
  -5  -4  -3   52.09    3.30
   5   4   3   61.39    5.00
   5   4   3   55.69    3.60
   5   4   3   57.29    3.20
  -5   4  -3   62.09    3.40
   5   4   3   61.59    3.40
  -5   4  -3   49.99    4.20
   5   4   3   56.19    3.00
  -6  -4  -3  168.48    8.50
   6  -4   3  162.98    8.80
  -6  -4  -3  170.48    9.00
   6  -4   3  168.18    8.40
   6  -4   3  154.88    9.50
   6   4   3  163.98    8.90
   6   4   3  164.38    8.30
   6   4   3  172.18    9.90
   6   4   3  180.98    8.70
   6   4   3  167.48    8.50
  -7  -4  -3    0.20    0.70
   7  -4   3    2.90    0.60
   7  -4   3    0.60    1.00
   7   4   3    0.00    1.20
   7   4   3    1.60    0.60
  -7   4  -3    1.50    0.40
   7   4   3   -1.40    1.80
   8  -4   3   55.19    3.10
   8  -4   3   56.39    3.90
   8  -4   3   58.49    5.10
  -8   4  -3   51.39    3.00
   8   4   3   53.69    3.10
   8   4   3   51.89    2.80
  -9  -4  -3  258.67   13.30
  -9  -4  -3  262.57   13.90
   9  -4   3  265.87   13.20
   9  -4   3  270.37   15.10
   9  -4   3  279.57   13.90
  -9   4  -3  265.27   13.20
   9   4   3  261.17   13.90
   9   4   3  257.17   15.10
   9   4   3  250.47   12.90
   9   4   3  259.67   13.20
  10  -4   3   22.70    3.00
  10  -4   3   25.80    1.90
 -10  -4  -3   30.10    2.70
  10  -4   3   20.20    4.30
 -10  -4  -3   26.50    2.00
  10   4   3   24.20    2.80
  10   4   3   26.90    1.60
  10   4   3   27.60    4.20
  10   4   3   28.80    1.80
 -10   4  -3   27.50    1.50
  11  -4   3  127.89    9.80
  11  -4   3  129.99    8.20
 -11  -4  -3  145.39    8.20
  11  -4   3  128.69    7.20
 -11  -4  -3  138.39    7.40
  11   4   3  139.29    6.90
 -11   4  -3  137.29    6.90
  11   4   3  143.19    7.20
  11   4   3  146.19    8.20
 -11   4  -3  141.89    7.30
  11   4   3  142.39    9.70
  12  -4   3   54.29    6.80
 -12  -4  -3   45.00    3.20
  12  -4   3   44.30    4.40
  12  -4   3   46.00    3.00
 -12  -4  -3   53.29    4.20
  12   4   3   48.10    2.60
 -12   4  -3   47.10    2.60
 -12   4  -3   47.50    3.00
  12   4   3   49.50    2.90
  12   4   3   55.89    4.40
 -13  -4  -3   16.40    2.00
 -13  -4  -3   16.30    3.00
  13   4   3   11.90    1.30
  13   4   3   11.40    1.00
  14  -4   3  114.49    8.20
 -14  -4  -3  130.69    8.00
  14  -4   3  118.19   10.60
 -14   4  -3  123.89    6.50
  14   4   3  130.19    6.40
  14   4   3  131.19    8.10
  14   4   3  127.69   10.20
  14   4   3  130.29    6.70
 -14   4  -3  122.39    6.90
 -15  -4  -3    8.50    1.80
 -15  -4  -3    7.50    2.40
  15  -4   3    6.40    4.00
  15  -4   3    4.30    2.40
 -15   4  -3    8.80    1.00
  15   4   3    5.90    3.50
 -15   4  -3    7.90    1.40
  15   4   3    8.60    1.30
  16  -4   3   44.60    5.30
  16  -4   3   42.30    7.80
 -16  -4  -3   44.40    3.50
 -16  -4  -3   49.00    4.90
 -16   4  -3   46.50    3.30
 -16   4  -3   46.70    2.80
  16   4   3   49.60    3.10
  16   4   3   44.20    4.90
  16   4   3   44.40    2.70
  16   4   3   42.30    7.20
  17   4   3   98.79    5.40
 -17   4  -3  108.39    6.10
  17   4   3   91.19    7.40
  17  -5  -3    5.70    5.10
 -17  -5   3    4.80    2.00
 -17  -5   3    5.30    2.80
  17   5  -3    2.00    2.50
 -17   5   3    5.50    1.20
  17   5  -3    1.60    4.30
 -17   5   3    6.40    1.60
  16  -5  -3   -0.20    4.00
 -16  -5   3    0.30    2.30
  16  -5  -3    1.60    2.40
 -16  -5   3    0.80    1.50
  16   5  -3    0.90    3.50
  16   5  -3   -0.90    2.30
 -16   5   3    2.20    0.70
 -16   5   3    1.50    1.10
 -15  -5   3   11.00    2.90
  15  -5  -3    9.50    4.50
 -15  -5   3   11.30    2.30
  15  -5  -3    8.20    2.70
 -15   5   3   11.30    1.90
 -15   5   3   11.50    1.30
  15   5  -3    9.60    2.60
  15   5  -3   13.90    4.30
 -14  -5   3  100.99    6.00
  14  -5  -3   91.09    7.20
  14  -5  -3  101.69    9.70
 -14  -5   3   97.09    7.10
  14   5  -3  103.79    7.00
 -14   5   3  102.69    5.40
  14   5  -3  110.29    9.00
 -13  -5   3   19.00    2.20
  13  -5  -3   17.20    3.70
  13  -5  -3   21.50    4.70
 -13   5   3   17.80    1.90
 -13   5   3   19.10    1.40
  13   5  -3   13.40    3.30
  13   5  -3   16.80    3.80
 -12  -5   3  114.09    6.60
  12  -5  -3  142.69    9.90
 -12  -5   3  113.39    7.60
  12   5  -3  108.39    7.30
  12   5  -3   98.59    8.90
 -12   5   3  118.59    6.50
 -12   5   3  120.49    6.00
 -11  -5   3  145.59    9.00
  11  -5  -3  155.18    8.90
  11  -5  -3  154.18   10.70
 -11  -5   3  141.89    8.00
  11   5  -3  142.49   10.10
 -11   5   3  141.89    7.90
  11   5  -3  152.48    8.60
  10  -5  -3  157.18   10.90
 -10  -5   3  175.48    9.60
  10  -5  -3  156.88    9.40
 -10  -5   3  171.08    8.70
 -10   5   3  160.08    8.60
  10   5  -3  157.78    9.60
   9  -5  -3   49.20    5.10
  -9  -5   3   36.10    2.60
  -9  -5   3   34.00    3.30
   9  -5  -3   44.20    3.70
   9   5  -3   41.80    3.20
   9   5  -3   35.40    2.00
   9   5  -3   45.60    4.30
  -9   5   3   30.90    2.20
  -9   5   3   38.50    2.60
  -8  -5   3   36.20    3.00
  -8  -5   3   33.20    2.30
   8  -5  -3   28.20    3.20
   8  -5  -3   30.20    4.50
   8   5  -3   29.60    2.70
   8   5  -3   29.90    3.70
  -8   5   3   30.40    2.20
   8   5  -3   32.40    1.70
   8   5  -3   34.10    1.90
  -7  -5   3   62.09    4.30
   7  -5  -3   59.09    4.20
   7  -5  -3   55.79    5.50
  -7  -5   3   64.19    3.60
   7   5  -3   62.99    3.80
   7   5  -3   57.19    4.60
  -7   5   3   61.29    3.60
   7   5  -3   57.89    3.10
   7   5  -3   62.49    3.30
   6  -5  -3  308.97   15.70
   6  -5  -3  309.17   16.80
  -6  -5   3  318.67   16.00
  -6  -5   3  315.67   15.40
  -6  -5   3  280.97   16.30
   6   5  -3  307.77   16.00
  -6   5   3  308.97   15.40
   6   5  -3  301.47   15.50
   6   5  -3  299.67   15.20
   5  -5  -3  217.58   11.40
   5  -5  -3  219.98   12.40
  -5  -5   3  225.78   11.20
  -5  -5   3  206.08   11.90
  -5  -5   3  224.88   11.80
   5   5  -3  223.78   11.10
   5   5  -3  219.98   11.10
   5   5  -3  218.38   11.60
  -4  -5   3  420.46   20.30
   4  -5  -3  402.76   19.90
  -4  -5   3  419.36   19.70
  -4   5   3  341.47   20.40
   4   5  -3  394.36   19.70
   4   5  -3  399.36   20.00
  -4   5   3  395.86   19.80
  -3  -5   3    5.20    1.20
   3  -5  -3    6.40    1.20
  -3  -5   3    6.10    0.80
   3   5  -3    3.60    0.70
  -3   5   3    5.40    0.90
  -3   5   3    4.60    1.10
  -2  -5   3 1319.07   60.59
   2  -5  -3 1183.88   60.19
  -2  -5   3 1250.37   60.59
  -2   5   3 1220.18   60.29
   2   5  -3 1263.97   60.39
  -2   5   3 1153.08   60.89
  -1  -5   3  286.87   14.60
   1  -5  -3  277.27   14.40
  -1  -5   3  283.27   14.10
   1   5  -3  284.87   14.40
  -1   5   3  283.87   14.20
   0  -5  -3  961.40   48.50
   0  -5   3  996.30   48.30
   0  -5   3  976.70   48.70
   0   5  -3 1021.50   48.60
   1  -5   3   11.80    1.10
  -1  -5  -3   12.60    1.20
   1  -5   3   10.80    1.50
  -1   5  -3   13.20    1.40
   1   5   3   10.40    1.30
   1   5   3   14.90    1.20
   2  -5   3  126.99    6.80
  -2  -5  -3  134.19    7.00
  -2  -5  -3  132.69    6.80
   2   5   3  132.19    7.20
   2   5   3  141.49    6.90
   2   5   3  134.49    7.60
   2   5   3  130.59    6.70
  -3  -5  -3    5.30    0.90
   3  -5   3    7.30    1.40
   3   5   3    5.80    0.90
   3   5   3    2.40    0.80
   3   5   3    2.10    1.30
  -3   5  -3    4.10    1.00
   3   5   3    4.40    0.50
  -3   5  -3    2.10    1.00
  -4  -5  -3  718.13   34.40
  -4  -5  -3  684.93   35.40
   4  -5   3  780.52   34.50
  -4  -5  -3  674.13   34.80
   4  -5   3  702.93   34.90
   4  -5   3  678.63   34.30
   4   5   3  683.13   34.20
   4   5   3  716.73   34.40
   4   5   3  692.53   35.30
   4   5   3  722.83   34.80
  -4   5  -3  672.23   35.10
   4   5   3  673.03   34.60
  -5  -5  -3    9.20    1.20
   5  -5   3   14.00    2.30
   5   5   3   10.50    1.00
   5   5   3   10.50    0.80
   5   5   3   10.30    1.20
   5   5   3    7.50    1.60
  -5   5  -3    9.60    2.00
  -6  -5  -3  114.49    6.30
   6  -5   3  130.19    6.30
   6  -5   3  129.69    7.50
   6  -5   3  132.29    6.60
  -6  -5  -3  109.59    6.80
   6   5   3  112.79    6.00
   6   5   3  119.09    6.70
   6   5   3  118.39    6.30
   6   5   3  118.49    7.70
   7  -5   3  206.28   11.90
   7  -5   3  198.38   10.50
  -7  -5  -3  204.68   11.20
  -7  -5  -3  206.38   10.60
   7  -5   3  216.98   11.00
   7   5   3  207.98   12.20
   7   5   3  211.88   10.50
   7   5   3  204.98   10.30
   7   5   3  208.58   11.10
   8  -5   3  338.97   19.30
   8  -5   3  358.56   18.30
  -8  -5  -3  356.86   17.90
   8  -5   3  340.47   17.80
  -8  -5  -3  364.46   18.70
   8   5   3  360.86   19.60
  -8   5  -3  370.16   17.80
   8   5   3  370.06   18.50
   8   5   3  367.66   17.80
   8   5   3  355.06   17.60
   9   5   3    6.80    1.00
   9   5   3    5.70    0.70
  -9   5  -3    6.40    1.10
  10  -5   3   78.49    4.60
  10  -5   3   83.69    5.60
  10  -5   3   79.99    6.90
 -10  -5  -3   87.49    5.60
 -10  -5  -3   87.59    4.80
  10   5   3   80.39    6.80
  10   5   3   87.09    4.40
 -10   5  -3   86.79    4.60
  10   5   3   83.49    5.50
  10   5   3   89.09    4.60
  11  -5   3   19.40    3.20
  11  -5   3   23.60    2.00
  11  -5   3   23.20    4.00
 -11   5  -3   21.50    1.70
  11   5   3   21.20    1.70
 -11   5  -3   21.10    1.40
  11   5   3   21.30    1.40
 -12  -5  -3   22.50    3.40
  12   5   3   17.40    1.40
 -12   5  -3   12.20    1.50
 -12   5  -3   11.60    1.10
  12   5   3   15.80    1.10
 -13  -5  -3  185.78   11.60
  13  -5   3  206.68   13.80
 -13  -5  -3  219.28   11.70
  13  -5   3  185.18   11.50
  13   5   3  203.08   10.30
 -13   5  -3  197.58   10.10
  13   5   3  202.48   11.50
  13   5   3  207.28   10.00
 -13   5  -3  197.78   10.40
  13   5   3  208.98   13.50
 -14  -5  -3   22.00    3.50
  14  -5   3   18.80    5.00
 -14  -5  -3   19.20    2.30
  14   5   3   20.80    4.40
  14   5   3   19.80    3.70
 -14   5  -3   23.00    1.50
  14   5   3   20.80    1.70
 -14   5  -3   21.50    1.90
 -15  -5  -3    1.10    1.10
 -15  -5  -3    0.00    1.90
 -15   5  -3    0.90    0.40
  15   5   3    0.40    2.00
  15   5   3    2.60    3.20
  15   5   3    0.60    0.40
 -15   5  -3    0.70    0.80
  15   5   3    0.80    0.70
  16  -5   3   10.50    5.20
 -16   5  -3   17.50    1.50
  16   5   3   20.80    1.90
  16   5   3   19.80    1.40
  16   5   3   19.50    4.00
 -16   5  -3   17.30    2.00
  16   5   3   17.40    4.30
  17  -5   3   12.70    6.20
  17   5   3   14.90    1.30
 -17   5  -3   10.00    1.90
 -17  -6   3    4.00    3.00
  17  -6  -3    2.00    2.40
  17  -6  -3    3.10    4.40
 -17  -6   3    5.00    1.70
 -17   6   3    5.20    1.10
  17   6  -3    2.00    3.80
  17   6  -3    0.90    2.50
 -17   6   3    7.00    1.60
 -16  -6   3   21.90    4.20
  16  -6  -3   26.30    4.70
  16  -6  -3   22.30    5.90
 -16  -6   3   16.00    2.80
 -16   6   3   23.40    1.80
  16   6  -3   20.90    4.20
 -16   6   3   21.80    2.40
  16   6  -3   25.00    5.20
 -15  -6   3    6.80    1.80
  15  -6  -3    7.80    2.70
 -15  -6   3    7.30    2.70
  15  -6  -3   14.20    4.70
  15   6  -3    4.10    3.70
 -15   6   3    9.20    1.20
  15   6  -3    6.30    2.70
 -15   6   3    8.80    1.60
  14  -6  -3   33.30    6.10
  14  -6  -3   37.10    5.00
 -14  -6   3   49.10    4.70
 -14  -6   3   45.20    3.50
 -14   6   3   39.90    3.10
  14   6  -3   43.30    4.60
 -14   6   3   41.10    2.50
  14   6  -3   43.00    6.40
  13  -6  -3   40.80    4.60
  13  -6  -3   38.50    6.50
 -13  -6   3   51.09    4.60
  13   6  -3   45.60    6.00
 -13   6   3   33.20    2.80
  13   6  -3   44.80    4.30
 -13   6   3   34.70    2.30
  12  -6  -3   34.30    6.20
 -12  -6   3   33.10    4.30
  12  -6  -3   32.20    4.20
 -12  -6   3   34.90    2.90
  12   6  -3   31.00    3.80
  12   6  -3   27.30    5.50
 -12   6   3   33.90    2.50
  11  -6  -3   70.09    8.60
 -11  -6   3   62.49    4.20
  11  -6  -3   64.29    5.30
 -11  -6   3   62.49    5.30
  11   6  -3   65.59    5.00
 -11   6   3   63.69    4.00
  11   6  -3   65.29    3.30
  11   6  -3   60.49    6.50
  10  -6  -3  168.78   11.30
 -10  -6   3  157.18   10.00
 -10  -6   3  164.48    9.10
  10  -6  -3  169.08    9.80
  10   6  -3  174.28   10.70
  10   6  -3  168.48    8.40
 -10   6   3  173.98    9.00
  10   6  -3  161.28    9.90
  10   6  -3  187.78    9.10
   9  -6  -3   36.00    4.90
  -9  -6   3   25.20    2.30
  -9  -6   3   23.20    2.90
   9   6  -3   21.40    4.00
   9   6  -3   25.50    1.50
  -9   6   3   28.40    2.10
   9   6  -3   26.40    2.80
  -8  -6   3   31.20    2.30
   8  -6  -3   29.10    4.60
  -8  -6   3   28.20    2.90
   8  -6  -3   25.90    3.10
  -8   6   3   32.30    2.20
   8   6  -3   25.10    2.70
   8   6  -3   21.90    3.60
   8   6  -3   29.30    1.60
   7  -6  -3    4.30    1.50
   7  -6  -3    3.60    2.30
  -7  -6   3    3.20    0.90
  -7  -6   3    4.20    1.50
  -7   6   3    3.00    0.80
   7   6  -3    6.90    1.80
   7   6  -3    2.60    0.80
   7   6  -3    3.70    0.70
  -6  -6   3 1295.67   63.79
  -6  -6   3 1340.67   62.99
   6  -6  -3 1246.68   63.29
   6  -6  -3 1266.07   64.39
  -6  -6   3 1237.68   63.89
   6   6  -3 1246.78   62.89
   6   6  -3 1334.27   63.59
   6   6  -3 1325.67   63.09
   5  -6  -3   46.80    3.30
  -5  -6   3   42.80    2.80
  -5  -6   3   40.90    3.40
  -5  -6   3   39.10    3.70
   5   6  -3   45.30    2.70
   5   6  -3   43.30    2.70
  -5   6   3   45.10    2.90
  -4  -6   3  132.19    7.60
  -4  -6   3  136.19    7.00
   4  -6  -3  131.79    7.20
  -4   6   3  125.49    7.30
   4   6  -3  135.99    7.00
  -3  -6   3  177.58    9.00
  -3  -6   3  173.68    9.60
  -3   6   3  166.98    9.50
  -3   6   3  182.78   10.10
   3   6  -3  174.58    9.10
   2  -6  -3   72.79    4.30
  -2   6   3   81.39    4.80
  -1  -6   3    3.10    1.10
  -1   6   3    1.50    0.80
   0  -6   3 1029.60   50.39
   0  -6   3  996.80   51.09
   0   6   3 1072.19   50.49
   0   6  -3 1010.90   50.59
   1  -6   3  900.01   43.20
  -1  -6  -3  855.01   43.00
   1   6   3  904.11   43.20
  -1   6  -3  853.81   43.30
  -2   6  -3 1493.35   74.79
   2   6   3 1567.84   74.59
   2   6   3 1516.95   75.19
   3  -6   3  102.39    5.50
  -3  -6  -3  106.49    5.60
  -3   6  -3  102.29    6.10
   3   6   3  112.59    5.70
  -3   6  -3   97.49    5.90
   3   6   3  113.29    6.60
   3   6   3  104.59    5.40
   4  -6   3  270.97   13.00
  -4  -6  -3  265.77   14.20
  -4  -6  -3  252.47   13.00
  -4  -6  -3  251.47   13.50
   4  -6   3  273.97   12.80
   4  -6   3  260.77   13.50
  -4   6  -3  236.48   13.30
  -4   6  -3  245.58   13.60
   4   6   3  262.47   13.00
   4   6   3  258.77   13.90
   4   6   3  250.37   12.70
   5  -6   3  208.38   11.40
  -5  -6  -3  209.48   10.60
   5  -6   3  209.68   10.70
  -5  -6  -3  209.68   11.30
   5   6   3  205.28   10.90
   5   6   3  202.78   11.70
   5   6   3  215.38   10.60
   5   6   3  207.58   10.30
   6  -6   3  465.35   23.10
   6  -6   3  447.36   23.90
  -6  -6  -3  465.75   23.70
  -6  -6  -3  459.65   23.00
   6   6   3  452.75   24.30
   6   6   3  461.85   23.30
   6   6   3  466.85   22.70
   6   6   3  481.55   23.00
   7  -6   3   31.20    3.70
   7  -6   3   31.60    2.70
   7   6   3   30.60    1.80
   7   6   3   29.20    2.00
  -8  -6  -3  227.38   11.70
   8  -6   3  190.38   11.00
  -8  -6  -3  240.88   10.90
   8  -6   3  186.68   12.00
   8   6   3  218.68   11.30
   8   6   3  203.08   10.60
   8   6   3  226.68   12.70
  -8   6  -3  180.88   10.50
   8   6   3  203.58   10.30
  -9  -6  -3  102.09    6.50
   9  -6   3  106.39    7.50
  -9  -6  -3  103.39    5.70
   9  -6   3   96.19    7.60
   9   6   3  102.59    5.50
  -9   6  -3  100.09    5.50
   9   6   3  108.99    7.70
   9   6   3   99.09    5.20
 -10  -6  -3   25.80    2.30
  10  -6   3   25.30    4.10
 -10  -6  -3   25.60    3.00
  10   6   3   28.50    1.90
  10   6   3   23.20    4.00
 -10   6  -3   25.50    1.80
  10   6   3   20.50    3.10
  10   6   3   26.50    1.60
  11  -6   3   10.00    3.30
  11  -6   3   12.60    3.20
  11   6   3   10.40    3.20
 -11   6  -3    7.30    1.20
  11   6   3    8.40    1.20
  11   6   3    8.10    0.90
  12  -6   3  285.27   17.00
  12  -6   3  270.77   15.00
 -12  -6  -3  269.07   15.20
 -12  -6  -3  250.27   14.60
  12   6   3  279.57   13.90
  12   6   3  289.87   15.00
 -12   6  -3  279.07   13.90
 -12   6  -3  267.07   13.60
  12   6   3  271.47   13.60
  12   6   3  286.57   16.70
 -13  -6  -3    4.20    2.40
  13  -6   3    8.50    3.60
 -13  -6  -3    4.70    1.60
  13  -6   3    7.20    2.30
 -13   6  -3    5.50    0.80
  13   6   3    7.80    1.20
  13   6   3    6.40    2.30
 -13   6  -3    6.80    1.20
  13   6   3    8.00    0.90
  13   6   3    7.30    3.80
  14  -6   3   -1.50    3.50
  14  -6   3    0.20    2.00
 -14  -6  -3   -1.90    2.10
  14   6   3    0.50    0.40
  14   6   3   -2.80    3.00
  14   6   3    0.10    0.60
 -14   6  -3    1.00    0.70
 -15  -6  -3   -0.80    2.00
 -15  -6  -3    1.80    1.30
  15  -6   3   -6.30    3.70
  15   6   3    2.00    0.70
  15   6   3    1.90    3.50
  15   6   3    0.30    2.00
  16  -6   3   15.60    4.90
  16  -6   3   18.80    4.40
 -16  -6  -3   19.60    2.80
 -16  -6  -3   22.60    4.10
  16   6   3   22.60    1.90
  16   6   3   22.00    4.70
 -16   6  -3   17.30    2.00
  16   6   3   23.60    4.20
  16   6   3   19.80    1.40
 -17  -6  -3   11.80    3.50
  17  -6   3   10.60    4.90
  17   6   3   14.80    5.40
  17   6   3   18.70    4.00
 -17   6  -3   13.10    1.90
  17   6   3   15.70    1.30
  17  -7  -3   -4.60    4.30
  17  -7  -3   -1.60    2.40
 -17  -7   3   -0.20    2.50
  17   7  -3   -2.60    3.40
 -17   7   3    0.60    1.10
 -16  -7   3   12.50    3.80
 -16  -7   3   10.80    2.20
  16  -7  -3    7.60    3.00
  16  -7  -3   10.10    5.20
  16   7  -3   12.20    2.90
  16   7  -3    9.40    3.90
 -16   7   3   12.40    1.30
 -16   7   3   14.00    1.90
  15  -7  -3    9.60    4.90
 -15  -7   3    8.30    2.90
  15  -7  -3    6.70    2.70
 -15  -7   3    7.20    1.90
 -15   7   3    8.70    1.10
 -15   7   3    7.70    1.60
  15   7  -3   13.10    3.90
 -14  -7   3  141.09    9.70
 -14  -7   3  138.79    8.20
  14  -7  -3  133.99   12.00
 -14   7   3  146.59    7.30
  14   7  -3  138.59   10.40
  14   7  -3  145.59    8.90
 -14   7   3  140.69    7.90
  13  -7  -3  134.59    8.50
  13  -7  -3  132.59   11.00
 -13  -7   3  124.19    8.70
 -13  -7   3  124.59    7.40
 -13   7   3  126.39    7.20
  13   7  -3  120.99    8.00
  13   7  -3  130.79    9.80
  12  -7  -3    6.30    3.60
  12  -7  -3    4.00    2.10
 -12  -7   3    0.80    2.00
 -12  -7   3    2.20    1.30
  12   7  -3    3.00    2.80
 -12   7   3    3.10    1.10
  12   7  -3    1.50    1.90
  12   7  -3    3.20    0.50
 -11  -7   3  130.29    9.10
 -11  -7   3  132.29    8.00
  11  -7  -3  156.88   12.00
  11  -7  -3  147.89    8.90
  11   7  -3  141.39    7.10
  11   7  -3  150.18    7.30
  11   7  -3  145.99    8.40
 -11   7   3  138.99    7.80
  11   7  -3  139.69    9.90
  10  -7  -3  228.48   12.90
 -10  -7   3  235.88   12.40
 -10  -7   3  230.78   13.50
  10  -7  -3  234.68   14.70
  10   7  -3  221.58   13.00
  10   7  -3  238.08   13.70
 -10   7   3  230.58   12.20
  10   7  -3  240.88   11.60
  10   7  -3  251.57   11.80
  -9  -7   3   25.20    2.40
   9  -7  -3   27.80    4.90
  -9  -7   3   22.00    3.20
   9  -7  -3   26.00    3.30
   9   7  -3   28.60    1.80
   9   7  -3   25.80    1.50
   9   7  -3   18.50    4.00
   9   7  -3   21.60    2.80
  -9   7   3   27.90    2.10
  -8  -7   3    1.10    1.50
   8  -7  -3    1.70    1.70
   8  -7  -3    1.30    2.50
  -8  -7   3    1.90    1.00
   8   7  -3    2.80    0.70
   8   7  -3    2.10    0.40
   8   7  -3    1.00    1.70
  -8   7   3    2.80    0.80
   8   7  -3    2.30    1.20
  -7  -7   3    8.40    2.00
  -7  -7   3    9.50    1.60
   7   7  -3    9.10    1.20
   7   7  -3    8.30    0.80
   7   7  -3    9.20    1.40
   7   7  -3    6.70    1.90
  -6  -7   3   29.50    3.40
   6   7  -3   27.00    3.10
   5  -7  -3  100.19    5.90
  -5  -7   3   95.89    6.40
  -5  -7   3  101.69    5.60
   5   7  -3  101.79    5.40
  -5   7   3   95.49    5.70
   5   7  -3  106.29    5.60
  -4  -7   3  233.68   12.10
  -4  -7   3  232.48   12.80
   4  -7  -3  238.38   12.30
  -4   7   3  240.28   12.30
   4   7  -3  234.58   12.10
  -3  -7   3  517.25   24.80
   3  -7  -3  469.35   24.90
  -3  -7   3  516.15   25.50
   3   7  -3  495.95   24.90
  -3   7   3  494.15   24.90
  -2  -7   3  562.24   28.00
  -2  -7   3  562.04   28.70
   2  -7  -3  534.35   28.10
  -2   7   3  571.74   28.20
  -2   7   3  603.74   28.70
   1  -7  -3   37.80    2.30
  -1   7   3   35.50    2.70
   0  -7   3  327.77   17.50
   0  -7  -3  347.17   16.90
   0  -7   3  330.47   17.00
   0   7   3  352.16   17.20
  -1  -7  -3   41.70    2.40
   1  -7   3   35.40    2.40
   1   7   3   37.20    2.60
  -2  -7  -3  587.04   29.00
   2  -7   3  565.54   28.90
   2   7   3  579.74   29.80
   2   7   3  620.34   29.20
   3  -7   3   89.69    5.00
  -3  -7  -3   91.59    5.20
   3   7   3  107.39    6.40
   3   7   3   89.59    4.90
   3   7   3  101.39    5.30
  -4  -7  -3  402.26   20.60
   4  -7   3  418.16   20.50
   4  -7   3  404.26   21.10
   4  -7   3  431.66   20.40
   4   7   3  430.96   22.10
   4   7   3  393.66   20.30
   4   7   3  423.06   20.60
  -4   7  -3  396.86   21.20
  -5  -7  -3   29.00    3.00
  -5  -7  -3   29.40    2.20
   5   7   3   25.70    3.50
   5   7   3   30.90    1.80
   5   7   3   33.50    2.10
   5   7   3   27.60    2.60
  -6  -7  -3   92.59    6.20
   6  -7   3   96.79    6.60
   6  -7   3   96.99    5.60
  -6  -7  -3   93.99    5.50
   6   7   3  100.59    5.00
   6   7   3   97.39    6.90
   6   7   3  102.59    5.30
   6   7   3   97.89    5.70
  -7  -7  -3  252.97   13.80
   7  -7   3  246.58   14.20
  -7  -7  -3  256.27   13.00
   7  -7   3  256.37   13.20
   7   7   3  259.67   12.80
   7   7   3  248.18   13.30
   7   7   3  246.58   14.50
   7   7   3  254.97   12.50
   8  -7   3  101.09    6.10
  -8  -7  -3   99.69    5.70
   8  -7   3  104.29    7.40
  -8  -7  -3   96.09    6.50
   8   7   3  101.19    7.50
   8   7   3  103.39    6.20
   8   7   3   97.59    5.40
   8   7   3   96.39    5.10
  -9  -7  -3   64.89    4.10
   9  -7   3   67.49    6.60
  -9  -7  -3   66.89    5.10
   9  -7   3   70.79    6.30
   9   7   3   65.79    3.80
  -9   7  -3   66.99    3.80
   9   7   3   64.59    3.50
   9   7   3   64.59    5.10
   9   7   3   58.99    5.90
  10  -7   3   49.80    6.30
  10  -7   3   59.99    4.80
  10   7   3   65.69    3.60
  10   7   3   63.99    3.30
 -10   7  -3   63.99    3.60
  11  -7   3   56.59    7.00
 -11  -7  -3   50.39    4.90
 -11  -7  -3   53.29    3.90
  11  -7   3   56.29    4.90
 -11   7  -3   52.89    3.30
  11   7   3   53.19    3.30
  11   7   3   56.79    6.60
  11   7   3   61.29    3.40
  11   7   3   55.39    4.70
 -12  -7  -3   21.90    3.80
  12  -7   3   29.40    6.30
 -12  -7  -3   18.20    2.70
  12  -7   3   29.00    4.00
  12   7   3   28.10    3.80
  12   7   3   24.40    1.60
  12   7   3   28.10    5.70
  12   7   3   25.90    1.90
 -12   7  -3   21.50    1.90
 -13  -7  -3   47.60    4.90
 -13  -7  -3   45.00    3.90
  13  -7   3   54.49    7.30
  13  -7   3   55.59    5.00
  13   7   3   47.20    6.70
  13   7   3   56.39    2.90
 -13   7  -3   54.09    2.90
  13   7   3   59.69    3.30
 -13   7  -3   53.19    3.30
  13   7   3   46.10    4.70
  14  -7   3   -2.90    2.00
 -14  -7  -3    0.60    2.50
 -14  -7  -3   -1.60    1.10
  14   7   3   -2.80    3.20
 -14   7  -3    0.20    0.70
  14   7   3    0.00    0.40
  14   7   3    0.10    0.70
 -14   7  -3    0.80    0.40
 -15  -7  -3   13.00    2.50
 -15  -7  -3   12.60    3.20
  15   7   3   11.20    1.00
  15   7   3   10.90    4.10
  15   7   3   12.60    1.40
  15   7   3    7.20    2.70
 -15   7  -3   11.10    1.40
  16  -7   3   63.39    9.90
 -16   7  -3   80.99    4.90
  16   7   3  109.39    9.40
 -16   7  -3   78.19    4.50
  16   7   3   87.19    4.50
  16   7   3   92.09    4.80
 -16  -8   3   -1.80    2.90
 -16  -8   3   -1.10    1.60
  16  -8  -3    0.30    2.50
  16   8  -3   -0.40    3.20
 -16   8   3   -0.40    0.90
  16   8  -3   -3.00    2.30
 -16   8   3    0.20    0.50
 -15  -8   3  106.59    8.40
 -15  -8   3  109.39    8.80
  15  -8  -3   92.09    7.90
  15  -8  -3  102.19   11.30
  15   8  -3  117.69    9.50
 -15   8   3  108.59    5.60
  15   8  -3  101.99    7.50
 -15   8   3  106.49    6.20
  14  -8  -3   -4.30    4.30
 -14  -8   3    7.60    2.80
 -14  -8   3    5.60    1.60
  14  -8  -3    2.40    2.60
 -14   8   3    1.80    1.50
 -14   8   3    1.20    1.00
  14   8  -3    3.60    2.80
  14   8  -3    2.40    2.30
 -13  -8   3   14.30    3.20
  13  -8  -3    2.20    3.90
  13   8  -3    7.50    2.30
  13   8  -3    9.20    3.30
 -12  -8   3    3.60    2.50
 -12  -8   3    4.40    1.50
  12   8  -3    4.20    2.00
  12   8  -3    6.80    2.90
  12   8  -3    4.50    0.70
  12   8  -3    6.10    0.90
  11  -8  -3    4.30    3.30
  11  -8  -3    5.30    2.10
 -11  -8   3    1.30    1.30
 -11  -8   3    1.20    2.20
  11   8  -3    1.70    0.40
 -11   8   3    1.30    0.90
  11   8  -3    1.10    1.60
  11   8  -3    4.90    2.80
  11   8  -3    2.10    0.70
  10  -8  -3   43.40    6.40
 -10  -8   3   46.00    3.60
  10  -8  -3   41.70    4.40
 -10  -8   3   57.09    5.00
  10   8  -3   44.30    2.80
  10   8  -3   56.89    5.50
 -10   8   3   43.00    3.10
  10   8  -3   43.70    2.50
  -9  -8   3  106.49    6.20
  -9  -8   3  104.69    7.40
   9  -8  -3   96.29    8.60
   9  -8  -3  105.49    6.80
   9   8  -3  104.69    5.40
   9   8  -3   98.59    7.30
  -9   8   3  110.59    6.00
   9   8  -3  110.89    5.70
   9   8  -3  106.59    6.20
   8  -8  -3    4.00    1.70
  -8  -8   3    2.60    1.70
  -8  -8   3    1.00    1.00
   8  -8  -3    6.50    2.70
   8   8  -3    1.70    1.10
   8   8  -3    1.20    0.40
   8   8  -3   -0.90    1.70
   8   8  -3    2.30    0.80
  -8   8   3    1.90    0.80
   7  -8  -3  480.15   24.30
  -7  -8   3  470.55   24.90
  -7  -8   3  490.55   24.00
   7   8  -3  478.25   24.50
  -7   8   3  465.45   24.10
   7   8  -3  478.15   23.80
   7   8  -3  471.05   23.70
  -6  -8   3  140.49    7.90
  -6  -8   3  137.89    8.80
   6  -8  -3  154.78    8.30
   6   8  -3  142.59    7.70
  -6   8   3  142.99    8.00
  -5  -8   3  291.17   15.40
   5  -8  -3  272.77   14.70
  -5  -8   3  287.57   14.40
   5   8  -3  274.97   14.40
  -5   8   3  280.27   14.60
  -4  -8   3   19.60    2.00
  -4  -8   3   18.30    2.80
   4   8  -3   21.50    2.00
  -3  -8   3   86.29    5.20
  -3  -8   3   78.09    4.30
   3  -8  -3   63.09    4.30
  -3   8   3   66.89    4.40
   3   8  -3   67.99    4.40
   2  -8  -3   56.99    3.50
  -2   8   3   49.00    4.30
  -1  -8   3  365.16   18.70
  -1  -8   3  358.76   19.40
   1  -8  -3  381.46   18.60
  -1   8   3  383.36   18.90
   0  -8  -3    0.90    0.70
   0   8   3    1.60    1.10
   1  -8   3  307.77   16.10
  -1  -8  -3  319.87   16.10
   1   8   3  332.27   16.30
  -2  -8  -3   89.99    5.30
   2  -8   3   94.99    5.20
   2   8   3   91.49    6.30
   2   8   3  103.49    5.50
  -3  -8  -3 1457.05   72.19
   3   8   3 1443.46   72.99
   3   8   3 1528.75   72.39
   4  -8   3    6.20    1.00
   4  -8   3    8.50    1.60
   4   8   3    9.70    0.90
  -4   8  -3    7.30    1.60
   4   8   3   15.40    3.30
   4   8   3   11.10    1.40
   5  -8   3   75.69    4.60
  -5  -8  -3   77.39    4.60
   5   8   3   78.89    5.80
   5   8   3   77.89    4.10
   5   8   3   81.19    4.50
   5   8   3   81.59    4.80
   6  -8   3  128.29    7.50
   6  -8   3  126.39    8.50
  -6  -8  -3  138.69    8.40
  -6  -8  -3  141.59    7.50
   6   8   3  131.89    7.30
   6   8   3  128.49    7.00
   6   8   3  148.19    7.80
   6   8   3  162.88    9.10
   7  -8   3   27.20    2.70
   7  -8   3   31.40    4.10
  -7  -8  -3   23.40    2.50
  -7  -8  -3   22.90    3.40
   7   8   3   21.20    4.20
   7   8   3   26.00    2.00
   7   8   3   23.70    1.60
   7   8   3   20.60    3.00
  -8  -8  -3    9.30    1.60
   8  -8   3   11.90    3.10
   8  -8   3   11.70    2.60
  -8  -8  -3    6.90    2.40
   8   8   3   13.50    3.10
   8   8   3    9.90    1.30
   8   8   3    9.00    1.00
   8   8   3   10.50    2.00
  -9  -8  -3   79.79    5.20
   9  -8   3   88.89    7.10
   9  -8   3   87.29    5.50
  -9  -8  -3   75.69    5.90
  -9   8  -3   79.59    4.50
   9   8   3   72.79    5.40
   9   8   3   83.99    4.50
   9   8   3   64.69    6.80
  10  -8   3   56.49    4.50
 -10  -8  -3   49.90    3.70
  10  -8   3   60.39    6.40
 -10  -8  -3   43.80    4.60
  10   8   3   48.70    2.80
  10   8   3   50.09    3.10
  10   8   3   41.10    6.10
 -10   8  -3   51.19    3.10
  10   8   3   48.10    4.40
 -11  -8  -3   98.69    6.10
  11  -8   3   98.49    6.70
 -11  -8  -3   93.09    7.20
  11  -8   3   97.19    9.80
  11   8   3  102.29    6.70
  11   8   3   98.29    5.10
  11   8   3  101.09    5.50
  11   8   3  106.09    8.60
 -11   8  -3   98.29    5.50
  12  -8   3    7.90    3.50
  12   8   3   12.20    1.50
  12   8   3   11.40    1.10
  13  -8   3   29.10    4.20
 -13  -8  -3   22.10    3.00
  13  -8   3   33.40    6.40
  13   8   3   27.20    5.10
  13   8   3   27.20    1.70
 -13   8  -3   27.60    2.10
  13   8   3   29.50    2.20
  13   8   3   20.50    3.90
  14  -8   3    6.00    4.10
  14  -8   3    3.10    2.50
 -14  -8  -3    1.20    1.40
 -14  -8  -3    0.00    2.30
  14   8   3   -3.90    3.10
  14   8   3    2.30    0.50
  14   8   3   -2.00    2.10
 -14   8  -3    3.20    0.90
  14   8   3    1.40    0.80
  15  -8   3   23.40    5.90
 -15  -8  -3   28.10    3.30
  15  -8   3   25.30    4.60
 -15  -8  -3   32.30    4.80
 -15   8  -3   31.10    1.90
 -15   8  -3   33.00    2.30
  15   8   3   28.20    4.50
  15   8   3   31.30    5.70
  15   8   3   31.60    1.90
 -16  -8  -3    9.10    2.10
 -16  -8  -3   10.80    3.80
  16  -8   3    9.50    4.80
  16   8   3   10.50    4.20
  16   8   3   10.40    2.80
 -16   8  -3   15.60    1.70
  16   8   3   13.80    1.10
 -16   8  -3   13.90    1.20
  16   8   3   16.70    1.70
 -16  -9   3    8.20    2.30
  16  -9  -3    5.10    3.00
  16  -9  -3   11.40    5.30
 -16  -9   3    6.90    3.70
  16   9  -3   11.70    4.20
  16   9  -3    6.60    2.70
 -15  -9   3   33.50    3.70
  15  -9  -3   30.40    6.60
 -15  -9   3   38.50    5.70
  15  -9  -3   28.60    5.20
 -15   9   3   33.40    2.80
 -15   9   3   35.40    3.20
 -15   9   3   30.30    2.20
  14  -9  -3    4.20    2.80
 -14  -9   3    3.20    2.00
  14  -9  -3    0.60    4.40
 -14  -9   3    2.40    2.50
 -14   9   3    2.60    1.10
  14   9  -3    9.80    3.40
 -14   9   3    0.90    1.70
  14   9  -3    2.30    2.30
 -13  -9   3   39.90    3.90
  13  -9  -3   43.10    5.20
  13  -9  -3   37.70    7.90
 -13  -9   3   40.50    5.20
  13   9  -3   43.30    2.40
 -13   9   3   41.70    3.10
  13   9  -3   40.20    6.10
  13   9  -3   46.80    2.70
 -13   9   3   44.90    3.70
  13   9  -3   37.20    4.40
 -12  -9   3    4.30    2.70
  12  -9  -3    5.40    2.40
  12  -9  -3    3.90    3.80
 -12  -9   3    6.10    1.80
  12   9  -3    5.20    2.10
  12   9  -3    8.50    0.80
 -12   9   3    8.40    1.40
 -12   9   3    6.70    1.70
  12   9  -3    6.40    3.10
  12   9  -3    9.40    1.20
 -11  -9   3  279.97   16.90
  11  -9  -3  283.47   16.20
 -11  -9   3  292.47   15.60
  11  -9  -3  286.57   18.70
  11   9  -3  305.67   15.70
  11   9  -3  316.27   15.00
  11   9  -3  303.47   17.00
 -11   9   3  292.97   15.60
  11   9  -3  304.47   14.70
 -10  -9   3   79.39    6.50
  10  -9  -3   65.79    9.40
  10  -9  -3   78.99    5.90
 -10  -9   3   76.79    5.20
 -10   9   3   72.49    5.10
  10   9  -3   81.89    4.40
 -10   9   3   74.99    4.70
  10   9  -3   85.29    6.60
  10   9  -3   76.99    4.10
   9  -9  -3   -0.50    1.60
  -9  -9   3    1.40    2.20
  -9  -9   3    1.90    1.30
   9   9  -3   -0.10    1.20
   9   9  -3    2.10    2.00
  -9   9   3   -0.40    0.80
  -9   9   3   -0.90    1.10
   9   9  -3    1.00    0.50
   9   9  -3    1.50    0.80
   8  -9  -3   52.49    4.50
  -8  -9   3   64.29    5.20
   8   9  -3   46.40    3.20
   8   9  -3   59.49    3.70
   8   9  -3   51.09    4.80
   8   9  -3   45.30    2.80
   7  -9  -3   25.00    3.40
  -7  -9   3   24.80    3.60
  -7  -9   3   27.00    2.70
   7   9  -3   28.60    2.30
  -7   9   3   29.70    2.80
   7   9  -3   27.50    2.40
   6  -9  -3   11.00    2.70
  -6  -9   3   12.50    2.00
  -6  -9   3   11.00    2.50
  -6   9   3   14.90    2.10
   6   9  -3   10.40    1.80
  -5  -9   3  358.66   18.20
  -5  -9   3  349.17   19.10
   5  -9  -3  362.96   18.30
   5   9  -3  354.66   18.10
  -5   9   3  351.36   18.30
  -4  -9   3   53.69    4.70
  -4  -9   3   55.79    3.80
   4  -9  -3   64.79    4.20
  -4   9   3   68.89    4.20
   4   9  -3   52.39    3.90
  -3  -9   3   94.89    6.30
   3  -9  -3   89.49    5.50
  -3  -9   3   92.39    5.40
   3   9  -3   93.29    5.60
  -3   9   3   92.89    5.60
  -2  -9   3   15.50    2.70
  -2  -9   3   14.60    1.80
  -2   9   3    9.80    1.90
  -1  -9   3  414.86   21.70
  -1  -9   3  414.26   22.60
   1  -9  -3  456.55   21.70
  -1   9   3  449.95   22.10
   0  -9   3  272.47   14.50
   0  -9  -3  286.97   14.40
   0   9   3  294.57   14.80
   1  -9   3   84.99    5.00
  -1  -9  -3   87.89    5.00
   1   9   3   95.89    5.30
  -2  -9  -3   17.90    1.90
   2  -9   3   14.60    1.70
   2   9   3   24.20    3.30
   2   9   3   18.80    2.00
  -3  -9  -3   22.90    2.10
   3  -9   3   20.60    1.90
   3   9   3   25.00    2.10
   4  -9   3   30.40    2.40
  -4  -9  -3   35.90    2.70
   4  -9   3   31.10    2.60
   4   9   3   36.90    2.10
   4   9   3   42.80    4.20
   4   9   3   39.20    2.60
   5  -9   3   87.49    6.40
  -5  -9  -3   75.59    4.70
   5   9   3   76.19    4.80
   5   9   3   78.29    4.60
   5   9   3   75.29    4.10
   5   9   3   75.79    5.90
  -6  -9  -3   36.80    3.10
   6  -9   3   48.50    3.30
   6   9   3   39.50    2.40
   6   9   3   40.00    2.80
   6   9   3   38.30    3.30
   6   9   3   37.80    4.60
  -7  -9  -3  497.95   25.20
  -7  -9  -3  487.15   26.10
   7  -9   3  513.05   26.40
   7  -9   3  503.65   25.20
   7   9   3  491.85   24.70
   7   9   3  502.25   25.30
   7   9   3  507.95   24.90
   7   9   3  484.45   26.40
  -8  -9  -3   16.40    2.60
  -8  -9  -3   15.50    3.10
   8   9   3   19.10    1.40
   8   9   3   20.80    1.80
   9  -9   3   -0.80    2.60
  -9  -9  -3   -1.80    1.90
  -9  -9  -3   -1.50    1.20
   9  -9   3    0.50    1.60
   9   9   3    0.50    0.70
   9   9   3    0.50    0.40
   9   9   3   -2.30    1.60
  10  -9   3   39.10    4.10
 -10  -9  -3   39.90    3.40
 -10  -9  -3   39.80    4.60
  10  -9   3   37.60    6.30
 -10   9  -3   36.30    2.60
  10   9   3   48.90    6.40
  10   9   3   32.50    2.20
  10   9   3   34.60    2.50
 -11  -9  -3  165.78    9.30
 -11  -9  -3  158.08   10.50
  11  -9   3  159.98    9.80
  11   9   3  164.98    9.70
  11   9   3  174.08    9.60
 -11   9  -3  169.88    8.80
  11   9   3  163.68    8.30
 -12  -9  -3   19.70    2.90
  12  -9   3   29.60    4.00
 -12  -9  -3   18.40    3.80
  12  -9   3   35.70    6.20
  12   9   3   23.00    3.80
 -12   9  -3   25.50    2.00
  12   9   3   24.20    4.50
  12   9   3   22.70    2.00
  12   9   3   23.70    1.60
 -13  -9  -3   40.50    3.80
 -13  -9  -3   38.80    5.10
  13  -9   3   52.99    7.30
  13   9   3   45.10    2.50
  13   9   3   39.90    6.70
  13   9   3   37.60    4.60
 -13   9  -3   46.70    2.90
 -14  -9  -3   34.30    3.70
  14  -9   3   34.60    6.30
 -14  -9  -3   33.10    5.00
  14   9   3   41.60    2.40
  14   9   3   42.90    2.80
  14   9   3   35.70    6.70
 -14   9  -3   43.00    2.80
  14   9   3   39.00    4.80
 -15  -9  -3    0.90    3.00
  15  -9   3   -2.00    2.30
  15  -9   3    0.90    4.10
 -15  -9  -3   -0.20    1.60
  15   9   3    3.30    1.00
  15   9   3    2.10    0.50
  15   9   3    6.00    2.60
  15   9   3    5.80    3.60
 -15   9  -3    2.40    0.50
 -15   9  -3    3.80    1.00
 -16  -9  -3   11.30    3.90
  16  -9   3    6.50    2.80
 -16   9  -3   11.00    1.50
 -16   9  -3    9.80    1.10
  16   9   3    8.60    2.90
  16   9   3   10.00    1.50
  16   9   3    5.00    3.70
  16   9   3    9.40    1.00
 -15 -10   3   13.00    4.00
  15 -10  -3    7.20    2.90
  15 -10  -3    3.90    4.90
 -15 -10   3    9.00    2.40
 -15  10   3   11.20    2.30
  15  10  -3   12.00    4.00
 -15  10   3   10.80    1.90
 -14 -10   3   40.40    5.50
  14 -10  -3   33.40    5.20
 -14 -10   3   38.20    4.00
  14 -10  -3   30.20    6.70
  14  10  -3   37.30    2.30
  14  10  -3   39.10    2.60
 -14  10   3   36.50    3.70
  14  10  -3   39.90    4.50
 -14  10   3   39.20    3.00
  14  10  -3   43.60    6.10
  13 -10  -3   36.40    6.80
  13 -10  -3   44.80    6.40
 -13 -10   3   47.80    6.00
 -13 -10   3   49.60    4.80
  13  10  -3   52.29    3.10
  13  10  -3   49.99    6.70
 -13  10   3   50.49    4.00
  13  10  -3   49.10    2.70
  13  10  -3   44.70    4.70
 -13  10   3   52.89    3.50
  12 -10  -3   19.70    4.20
 -12 -10   3   24.60    4.50
 -12 -10   3   18.80    3.30
  12 -10  -3   21.00    5.00
  12  10  -3   25.30    1.50
  12  10  -3   24.20    4.50
  12  10  -3   25.60    1.90
 -12  10   3   21.50    2.20
 -12  10   3   20.50    3.00
  12  10  -3   18.80    3.60
  11 -10  -3    1.30    2.10
 -11 -10   3    2.40    2.70
 -11 -10   3    0.60    1.60
  11  10  -3    6.10    2.70
  11  10  -3    2.00    0.80
 -11  10   3    1.90    1.00
 -11  10   3    2.70    1.70
  11  10  -3    1.30    0.50
  11  10  -3    2.90    1.70
 -10 -10   3    0.70    2.40
  10 -10  -3    2.20    2.20
 -10 -10   3    2.70    1.50
  10  10  -3    4.40    1.00
 -10  10   3    3.10    1.70
  10  10  -3    4.50    2.50
 -10  10   3    5.50    1.50
  -9 -10   3   71.29    4.90
   9 -10  -3   70.19    5.70
  -9 -10   3   71.39    6.20
  -9  10   3   71.29    4.50
   9  10  -3   73.79    4.70
   9  10  -3   76.89    4.50
   9  10  -3   75.19    6.00
  -9  10   3   72.59    5.00
   9  10  -3   71.59    4.30
  -8 -10   3    1.20    1.30
   8 -10  -3    0.20    1.70
   8  10  -3    2.10    0.60
   8  10  -3    0.30    1.70
   8  10  -3    1.40    1.00
   8  10  -3    2.50    1.20
  -8  10   3   -0.10    1.40
  -7 -10   3   24.90    2.90
  -7 -10   3   22.20    3.90
   7  10  -3   26.80    2.30
  -7  10   3   25.00    2.90
   7  10  -3   24.90    2.40
  -6 -10   3  371.56   18.70
   6 -10  -3  368.26   19.00
  -6 -10   3  354.56   19.90
   6  10  -3  359.26   18.60
  -6  10   3  368.36   18.90
  -5 -10   3    5.00    2.20
   5 -10  -3    5.90    1.70
  -5 -10   3    5.80    1.40
  -5  10   3    4.20    1.70
   5  10  -3    5.80    1.50
   4 -10  -3    1.30    1.30
  -4  10   3    2.50    1.30
   4  10  -3    3.00    1.20
  -3 -10   3   93.59    5.70
   3 -10  -3   99.29    5.90
  -3 -10   3   93.19    6.70
   3  10  -3  100.39    5.90
  -3  10   3  101.59    6.00
  -2 -10   3   50.99    4.60
  -2 -10   3   43.80    4.70
   2  10  -3   54.39    4.00
  -2  10   3   62.89    4.00
   1 -10  -3   97.39    5.40
  -1 -10   3   89.79    5.50
  -1  10   3   96.19    5.80
   0 -10   3  116.09    6.70
   0 -10  -3  123.59    6.60
   0  10   3  124.89    7.00
  -1 -10  -3    7.20    1.20
   1 -10   3    6.50    1.20
   1  10   3    3.50    2.10
   1  10   3    7.40    1.50
   2 -10   3  196.48   10.10
  -2 -10  -3  185.68   10.40
   2  10   3  199.78   10.40
   3 -10   3  348.87   17.70
   3  10   3  366.06   18.10
   3  10   3  342.57   18.80
   4 -10   3   62.19    3.40
  -4 -10  -3   53.29    3.70
   4  10   3   55.09    3.60
   4  10   3   53.89    5.10
   4  10   3   52.99    3.10
   5 -10   3   12.10    2.00
   5  10   3   16.70    1.70
   5  10   3   14.50    1.30
   6 -10   3   75.79    6.00
  -6 -10  -3   69.19    4.60
   6 -10   3   66.19    4.50
   6  10   3   73.29    4.30
   6  10   3   71.19    4.70
   6  10   3   64.89    6.00
   6  10   3   72.29    3.90
  -7 -10  -3  153.18    8.40
   7 -10   3  147.99    8.50
   7 -10   3  149.29    9.90
   7  10   3  145.89    8.10
   7  10   3  146.99    7.70
   7  10   3  155.48    8.70
   7  10   3  150.88   10.00
   8 -10   3  293.57   15.50
  -8 -10  -3  282.97   16.50
  -8 -10  -3  280.87   15.30
   8 -10   3  295.27   17.00
   8  10   3  294.47   14.70
   8  10   3  299.87   15.10
   8  10   3  295.87   17.00
   8  10   3  314.27   16.10
   9 -10   3    2.00    1.80
   9 -10   3   -1.30    2.90
   9  10   3    0.80    0.50
   9  10   3    0.90    0.80
 -10 -10  -3    2.40    1.50
  10  10   3    4.60    1.10
 -10  10  -3    8.20    1.40
  10  10   3    5.30    0.90
  10  10   3    2.90    3.10
  10  10   3    3.10    1.90
  11 -10   3   48.10    7.00
  11 -10   3   41.60    4.80
  11  10   3   56.39    2.90
 -11  10  -3   46.60    3.30
  11  10   3   58.39    4.30
  12 -10   3   88.79    6.60
 -12 -10  -3   74.99    7.10
  12 -10   3   87.29    8.70
 -12 -10  -3   83.19    5.80
  12  10   3   84.39    6.40
  12  10   3   88.59    4.60
  12  10   3   91.19    8.40
 -12  10  -3   86.99    5.00
  12  10   3   91.89    5.00
  13 -10   3    8.10    2.40
 -13 -10  -3    2.40    2.80
  13 -10   3    7.30    4.10
  13  10   3    5.00    1.00
  13  10   3    5.00    3.50
 -13  10  -3    8.10    1.40
  13  10   3    4.50    1.10
  13  10   3    2.40    2.20
  14 -10   3    0.30    3.90
 -14 -10  -3   -0.80    3.00
 -14 -10  -3    0.10    1.70
  14 -10   3    0.60    2.40
 -14  10  -3    2.50    1.00
  14  10   3    2.10    1.00
  14  10   3   -1.10    3.50
 -15 -10  -3   65.99    6.70
  15 -10   3   54.09    6.20
 -15 -10  -3   54.29    4.90
  15 -10   3   52.59    8.80
  15  10   3   66.89    5.70
  15  10   3   66.89    3.90
 -15  10  -3   60.79    3.40
  15  10   3   66.79    3.40
  15  10   3   60.89    8.20
 -15 -11   3   52.89    7.00
 -15 -11   3   48.10    4.90
  15 -11  -3   48.30    6.20
 -15  11   3   49.40    3.70
  15  11  -3   58.09    6.50
  15  11  -3   56.19    5.50
 -15  11   3   49.10    4.40
  14 -11  -3   55.79    6.50
 -14 -11   3   66.29    7.00
 -14 -11   3   63.69    5.30
  14  11  -3   56.29    3.30
 -14  11   3   60.09    4.90
 -14  11   3   58.79    4.10
  14  11  -3   65.19    5.50
  14  11  -3   70.29    6.80
  14  11  -3   63.49    3.70
 -13 -11   3    5.20    3.30
  13 -11  -3    6.60    2.80
 -13 -11   3    2.50    1.90
  13  11  -3   -0.80    2.10
  13  11  -3   -1.00    2.70
 -13  11   3    2.40    1.10
 -13  11   3    3.80    1.90
  13  11  -3    0.40    0.80
  12 -11  -3    0.00    2.30
 -12 -11   3   -1.60    2.20
 -12 -11   3   -1.30    2.80
 -12  11   3   -0.30    2.10
  12  11  -3   -1.80    1.70
 -12  11   3    0.90    1.00
  12  11  -3    1.00    0.50
  12  11  -3    0.60    0.80
  12  11  -3   -0.70    3.60
 -11 -11   3    7.90    3.60
 -11 -11   3    5.60    2.20
  11 -11  -3    9.90    2.90
  11  11  -3   14.50    3.40
 -11  11   3    7.40    2.50
  11  11  -3    8.80    2.20
 -11  11   3   11.50    1.90
  11  11  -3   12.00    1.70
  11  11  -3    9.20    1.10
 -10 -11   3  143.89    8.30
  10 -11  -3  131.89    8.90
 -10 -11   3  140.79    9.70
 -10  11   3  128.59    7.70
  10  11  -3  141.79    7.50
 -10  11   3  128.49    8.20
  10  11  -3  130.59    7.10
  10  11  -3  158.88    9.40
  -9 -11   3   39.80    3.70
   9 -11  -3   31.90    4.30
  -9 -11   3   33.90    4.80
   9  11  -3   39.00    3.30
   9  11  -3   36.20    2.80
  -9  11   3   37.90    3.60
   9  11  -3   34.90    2.30
   9  11  -3   47.50    4.70
   8 -11  -3   -0.20    1.90
  -8  11   3    2.10    1.50
  -7 -11   3   25.50    3.00
  -7 -11   3   27.30    4.20
   7  11  -3   24.20    2.40
   7  11  -3   28.30    2.60
   6 -11  -3   95.59    6.30
  -6 -11   3   91.49    5.90
  -6 -11   3   85.69    8.10
   6  11  -3   96.09    5.70
  -6  11   3   96.79    6.10
  -5 -11   3   24.30    4.10
   5 -11  -3   26.10    3.20
  -5 -11   3   24.50    2.90
  -5  11   3   23.40    2.90
   5  11  -3   22.40    2.70
  -4 -11   3   11.90    2.20
  -4 -11   3   15.50    3.20
   4 -11  -3   12.60    2.50
   4  11  -3   15.90    2.30
  -4  11   3   17.10    2.40
  -3  11   3   -0.80    1.10
  -2 -11   3  626.24   33.10
  -2 -11   3  619.94   32.00
  -2  11   3  662.53   32.40
   2  11  -3  657.33   32.40
  -1 -11   3   42.80    3.20
   1 -11  -3   39.60    2.80
  -1  11   3   35.00    3.40
   1  11  -3   39.00    3.60
   0 -11  -3   75.79    4.60
   0 -11   3   79.79    4.80
   0  11   3   77.09    5.10
   1 -11   3   52.09    3.60
  -1 -11  -3   55.09    3.70
   1  11   3   59.69    4.00
  -2 -11  -3   66.59    4.20
   2 -11   3   65.29    4.10
   2  11   3   69.59    4.50
   2  11   3   62.89    5.50
   3 -11   3    2.20    0.80
  -3 -11  -3    1.60    1.00
   3  11   3    1.10    1.10
   3  11   3    2.90    1.80
   4 -11   3  193.28    9.60
  -4 -11  -3  180.78    9.80
   4  11   3  177.08   10.90
   4  11   3  193.68    9.90
   4  11   3  166.98    9.20
   5 -11   3    0.10    1.10
  -5 -11  -3    1.50    1.20
   5  11   3    2.10    1.00
   5  11   3    2.50    0.60
   5  11   3    1.30    2.20
   5  11   3    0.10    1.30
  -6 -11  -3   14.00    2.30
   6 -11   3   17.40    2.50
   6  11   3   10.80    2.60
   6  11   3   14.50    3.20
   6  11   3   18.50    1.90
   6  11   3   16.60    1.40
   7 -11   3   -3.40    2.70
  -7 -11  -3    1.90    1.40
   7 -11   3   -0.40    1.50
   7  11   3    4.20    2.50
   7  11   3    1.70    0.60
   7  11   3    1.50    1.00
   8 -11   3  174.88   11.20
   8 -11   3  188.88   12.50
  -8 -11  -3  192.68   10.70
   8  11   3  203.38   11.50
   8  11   3  194.68    9.80
   8  11   3  210.48   12.60
   8  11   3  194.98   10.30
   9 -11   3   19.20    3.40
   9 -11   3   24.30    4.50
  -9 -11  -3   22.60    3.10
   9  11   3   20.40    4.00
   9  11   3   21.80    3.60
   9  11   3   24.10    1.70
  10 -11   3   29.50    4.10
 -10 -11  -3   30.50    3.50
  10 -11   3   31.70    6.10
  10  11   3   41.20    5.90
  10  11   3   31.20    2.50
  10  11   3   31.10    2.10
 -11 -11  -3   69.29    5.10
  11 -11   3   62.09    5.60
  11 -11   3   68.59    7.90
 -11 -11  -3   65.49    6.40
  11  11   3   70.99    4.20
 -11  11  -3   63.79    4.20
  11  11   3   70.59    7.20
  11  11   3   71.99    5.50
  11  11   3   68.39    3.70
  12 -11   3   13.70    4.40
 -13 -11  -3   22.20    3.60
 -13 -11  -3   23.40    4.60
  13 -11   3   34.60    4.60
  13 -11   3   34.50    7.20
  13  11   3   23.80    4.30
  13  11   3   30.20    2.00
  13  11   3   32.60    6.30
  13  11   3   31.80    2.50
  14 -11   3    3.40    2.40
  14 -11   3    8.20    4.30
  14  11   3    3.80    3.70
  14  11   3    2.90    1.10
  14  11   3    1.00    2.50
 -14  11  -3    5.20    1.20
  14  11   3    2.40    0.60
 -15 -11  -3   24.40    3.50
  15 -11   3   23.00    4.70
  15 -11   3   21.80    5.60
  15  11   3   21.10    1.70
 -15  11  -3   22.40    2.10
  15  11   3   20.10    2.10
  15  11   3   32.50    6.70
  15  11   3   29.70    4.40
 -14 -12   3    3.20    2.20
  14 -12  -3    2.70    2.80
 -14 -12   3   -1.30    3.00
 -14  12   3    2.10    2.00
  14  12  -3    3.50    3.00
  14  12  -3    0.50    1.20
 -14  12   3    2.10    1.20
  14  12  -3    2.50    2.20
  13 -12  -3   11.80    3.20
 -13 -12   3   13.10    4.10
 -13 -12   3   21.80    3.70
  13  12  -3   17.00    2.20
 -13  12   3   19.30    2.30
  13  12  -3   15.90    1.40
  13  12  -3   23.80    4.80
  13  12  -3   16.70    3.50
 -13  12   3   19.20    2.90
  12 -12  -3    5.10    2.50
 -12 -12   3   -2.90    2.80
 -12 -12   3    0.50    2.10
  12  12  -3   -1.30    1.90
  12  12  -3    1.50    0.50
  12  12  -3    0.70    1.40
  12  12  -3    0.50    3.40
 -12  12   3    2.80    2.00
 -12  12   3    2.30    1.20
 -11 -12   3   65.09    7.40
  11 -12  -3   84.09    6.80
 -11  12   3   79.99    5.20
  11  12  -3   80.89    4.40
 -11  12   3   83.59    5.90
  11  12  -3   84.09    5.30
  11  12  -3   85.99    7.00
  11  12  -3   81.09    5.60
 -10 -12   3   99.09    8.30
 -10 -12   3  103.19    6.90
  10 -12  -3  103.09    7.70
 -10  12   3  108.19    6.90
 -10  12   3  101.39    6.30
  10  12  -3  109.39    6.10
  10  12  -3  106.09    5.60
   9  12  -3    4.10    1.40
  -9  12   3   -0.50    1.70
  -8 -12   3    2.80    2.30
   8 -12  -3    0.00    1.90
  -8 -12   3    1.00    1.50
   8  12  -3    0.70    1.10
   8  12  -3    1.70    1.00
  -8  12   3    2.10    2.40
   8  12  -3    1.20    0.60
   7 -12  -3    6.90    2.30
  -7 -12   3    8.80    2.00
  -7 -12   3    6.70    2.90
   7  12  -3    9.10    1.70
  -7  12   3    8.50    2.40
  -6 -12   3  122.59    9.10
  -6 -12   3  121.79    7.70
   6  12  -3  133.99    7.50
  -6  12   3  132.49    7.90
  -5 -12   3   59.09    4.50
   5 -12  -3   58.39    4.70
  -5 -12   3   52.99    5.60
  -5  12   3   61.09    4.60
   5  12  -3   57.99    4.30
  -4 -12   3    6.00    1.60
  -4  12   3    5.20    1.70
   4  12  -3    5.40    1.70
  -3  12   3    1.20    1.40
  -2 -12   3   16.30    2.50
  -2  12   3   15.90    2.40
   2  12  -3   14.30    2.40
  -1 -12   3   51.69    4.00
   1 -12  -3   54.19    3.70
   1  12  -3   56.99    4.50
  -1  12   3   59.09    4.40
   0 -12  -3   -0.10    0.90
   0  12   3   -1.70    1.50
  -1 -12  -3   38.10    3.10
   1 -12   3   43.90    3.20
   1  12   3   38.10    3.40
   2 -12   3  114.79    6.60
  -2 -12  -3  121.19    6.80
   2  12   3  121.29    7.00
   2  12   3  109.99    7.80
  -3 -12  -3   32.10    3.00
   3  12   3   36.70    3.10
  -4 -12  -3    2.70    1.30
   4  12   3    4.90    1.30
   4  12   3    3.60    1.30
   4  12   3    0.90    2.00
  -5 -12  -3   42.70    3.50
   5 -12   3   36.40    3.20
   5  12   3   37.40    3.40
   5  12   3   41.60    2.60
   5  12   3   46.80    3.70
   5  12   3   45.60    5.00
   6 -12   3  133.59    8.20
  -6 -12  -3  145.09    8.20
   6  12   3  150.58    8.30
   6  12   3  135.39    7.40
   6  12   3  154.68    9.70
   7 -12   3   29.50    3.50
  -7 -12  -3   25.40    3.10
   7  12   3   27.40    4.90
   7  12   3   30.40    3.50
   7  12   3   24.00    2.00
   7  12   3   25.10    2.50
   8 -12   3    5.50    2.30
  -8 -12  -3    2.80    1.70
   8  12   3    5.00    1.30
   8  12   3    2.70    3.20
   8  12   3    3.70    2.10
   8  12   3    3.40    0.80
   9 -12   3  104.19    6.80
  -9 -12  -3   95.99    6.40
   9 -12   3  109.09    8.90
   9  12   3   99.09    5.80
   9  12   3   93.09    6.70
   9  12   3  100.99    5.30
   9  12   3   99.39    8.50
  10 -12   3    2.50    2.00
 -10 -12  -3    1.20    1.70
  10 -12   3    3.10    3.90
  10  12   3    1.30    0.60
  10  12   3    1.60    2.00
  10  12   3    2.20    1.00
  10  12   3    4.50    3.30
  11 -12   3   37.50    6.70
 -11 -12  -3   33.10    3.80
  11 -12   3   37.20    4.50
 -11  12  -3   26.70    2.70
  11  12   3   36.60    6.80
  11  12   3   30.50    2.10
  11  12   3   30.70    2.60
  11  12   3   39.70    4.30
 -12 -12  -3   35.80    4.10
  12 -12   3   43.00    7.30
  12 -12   3   42.80    4.80
  12  12   3   41.50    2.50
  12  12   3   39.30    4.70
 -12  12  -3   41.50    3.00
  12  12   3   44.20    3.00
  12  12   3   37.40    6.40
 -13 -12  -3    5.90    2.30
  13 -12   3   15.70    4.50
  13  12   3   10.90    1.30
  13  12   3    9.90    3.90
  13  12   3   11.40    1.80
 -13  12  -3   13.30    1.70
  13  12   3    9.10    2.80
  14 -12   3    0.40    2.30
  14 -12   3    4.30    4.20
 -14 -12  -3   -1.00    1.80
  14  12   3    1.60    3.50
  14  12   3   -0.30    0.50
  14  12   3   -0.70    1.00
 -14  12  -3    1.10    1.00
  14  12   3   -0.90    2.30
  13 -13  -3   12.00    3.40
 -13 -13   3   11.80    2.80
 -13 -13   3   12.20    4.40
  13  13  -3   14.80    1.90
  13  13  -3   14.00    1.30
 -13  13   3   23.90    3.50
 -13  13   3   17.00    2.20
  13  13  -3   17.40    3.30
  13  13  -3   25.70    5.20
  12 -13  -3    8.20    4.80
 -12 -13   3    7.70    3.80
 -12 -13   3    4.80    2.40
  12  13  -3    7.00    1.10
  12  13  -3    7.10    1.40
 -12  13   3    7.40    1.60
  12  13  -3    5.40    2.10
 -12  13   3   12.30    2.50
  11 -13  -3   86.49    6.90
 -11 -13   3   67.29    7.70
 -11 -13   3   72.79    6.10
  11  13  -3   80.09    4.40
  11  13  -3   83.39    5.00
  11  13  -3   85.69    5.60
 -11  13   3   95.29    6.10
 -11  13   3   78.59    5.20
 -10 -13   3   12.10    2.50
 -10 -13   3   15.20    4.00
  10  13  -3    9.20    3.10
  -9 -13   3   28.10    3.80
  -9 -13   3   41.70    5.60
   9  13  -3   32.10    3.10
  -8 -13   3   15.70    3.80
  -8 -13   3   25.20    3.50
   8  13  -3   20.00    1.80
   8  13  -3   17.70    2.30
  -8  13   3   28.40    3.30
  -7 -13   3   51.29    5.70
   7 -13  -3   36.80    4.40
   7  13  -3   50.59    3.60
  -7  13   3   41.60    4.00
  -6 -13   3   48.30    4.30
   6 -13  -3   50.99    4.50
  -6 -13   3   44.00    5.50
   6  13  -3   54.89    4.10
  -6  13   3   51.09    4.30
  -5 -13   3    7.60    2.00
  -5 -13   3    4.60    3.00
  -5  13   3   13.40    2.40
   5  13  -3    9.20    2.50
  -4 -13   3   -0.30    1.40
  -4 -13   3    0.80    2.20
  -4  13   3   -1.90    1.50
  -3 -13   3   18.50    2.80
  -3  13   3   17.80    2.80
  -2 -13   3   74.29    5.10
   1 -13  -3  246.38   12.60
  -1 -13   3  218.78   12.70
   1  13  -3  247.08   15.40
  -1  13   3  248.58   13.30
   0 -13   3   17.20    2.50
   0  13   3   25.80    2.90
   0  13  -3   18.40    3.40
  -1 -13  -3   12.10    2.10
   1  13   3   19.30    2.50
  -2 -13  -3   11.40    2.30
   2  13   3   14.50    2.30
   3 -13   3   17.10    2.20
  -3 -13  -3   11.50    2.40
   3  13   3   21.10    2.50
   4 -13   3   31.10    2.60
  -4 -13  -3   26.80    3.00
   4  13   3   26.00    2.70
   4  13   3   27.70    2.10
   4  13   3   28.10    3.10
  -5 -13  -3   -2.10    1.30
   5  13   3   -2.10    2.30
   5  13   3   -0.40    1.00
   5  13   3    0.30    0.60
   5  13   3   -0.40    1.50
   6 -13   3   -0.60    1.40
  -6 -13  -3    2.20    1.50
   6  13   3   -1.30    2.50
   6  13   3    1.20    1.70
   6  13   3    1.60    1.20
   6  13   3    1.80    0.70
  -7 -13  -3   76.79    5.30
   7 -13   3   73.39    5.40
   7  13   3   79.19    4.90
   7  13   3   69.99    7.00
   7  13   3   73.39    5.80
   7  13   3   76.79    4.30
  -8 -13  -3    3.60    1.70
   8  13   3    6.70    2.90
   8  13   3    1.70    1.10
   8  13   3    4.10    1.80
  -9 -13  -3   10.00    2.20
   9 -13   3    9.30    2.40
   9  13   3   11.00    1.80
   9  13   3    9.80    3.50
   9  13   3    9.70    2.30
   9  13   3    9.20    1.30
  10 -13   3   46.40    4.90
 -10 -13  -3   48.80    4.30
  10  13   3   46.20    3.40
  10  13   3   47.20    4.50
  10  13   3   45.90    2.90
  11 -13   3    0.40    2.00
  11  13   3   -3.10    3.20
 -11  13  -3   -0.10    0.90
  11  13   3    0.50    0.60
  11  13   3    0.50    0.90
  11  13   3   -2.70    1.90
  12 -13   3   37.70    4.70
  12 -13   3   40.00    7.40
 -12 -13  -3   27.10    3.90
  12  13   3   28.70    4.30
 -12  13  -3   34.00    2.80
  12  13   3   33.00    2.70
  12  13   3   31.30    6.10
  12  13   3   33.20    2.20
  13 -13   3   52.39    5.70
  13 -13   3   56.09    8.30
 -13 -13  -3   44.30    4.70
  13  13   3   51.29    3.20
  13  13   3   54.89    7.20
  13  13   3   49.80    3.50
  13  13   3   49.60    6.50
 -13  13  -3   51.99    3.60
 -12 -14   3   45.80    7.10
  12 -14  -3   53.79    6.40
 -12 -14   3   60.59    5.70
  12  14  -3   64.69    4.00
 -12  14   3   66.89    4.50
  12  14  -3   60.89    4.70
  12  14  -3   62.29    3.50
 -12  14   3   63.39    5.50
 -11 -14   3    7.20    4.10
 -11 -14   3   12.90    2.90
  11 -14  -3    9.60    3.00
 -11  14   3   15.70    2.90
  11  14  -3   11.70    1.40
  11  14  -3    9.60    2.20
 -11  14   3   11.70    2.10
  11  14  -3   13.60    2.10
 -10 -14   3   26.50    5.00
 -10 -14   3   23.00    4.10
  10  14  -3   34.10    2.20
 -10  14   3   21.00    3.60
  10  14  -3   36.10    2.90
  -9 -14   3    4.10    2.20
  -9 -14   3    5.90    3.20
   9 -14  -3    7.50    2.50
   9  14  -3    6.60    1.50
   9  14  -3    7.00    1.40
  -8 -14   3    7.50    3.50
  -8 -14   3    4.20    2.70
   8 -14  -3    4.90    2.40
   8  14  -3    4.60    0.90
   8  14  -3    5.90    1.50
  -8  14   3    5.00    2.20
  -7 -14   3   -1.60    2.70
   7 -14  -3    0.20    1.80
  -7 -14   3   -0.70    1.70
   7  14  -3    0.80    1.40
  -7  14   3   -0.60    1.60
   6 -14  -3   12.50    2.60
  -6 -14   3    8.70    2.30
  -6 -14   3    7.40    3.40
  -6  14   3   14.00    2.70
   6  14  -3   11.60    2.10
  -5 -14   3   -1.90    1.50
  -5  14   3   -0.70    1.60
  -4 -14   3    5.20    1.80
   4  14  -3    2.50    1.80
  -3 -14   3   82.19    5.40
  -3  14   3   70.29    5.40
   3  14  -3   70.19    5.40
  -2 -14   3   54.79    4.30
   2  14  -3   53.79    4.70
  -2  14   3   56.19    4.50
  -1 -14   3   24.60    3.00
   1  14  -3   26.60    3.50
   0 -14  -3    1.10    1.10
   0  14   3    1.50    1.70
   0  14  -3    2.90    2.00
   1 -14   3   90.29    5.70
  -1 -14  -3   90.19    5.60
  -1  14  -3   90.59    6.50
   1  14   3   87.99    6.00
  -2 -14  -3    3.40    1.30
   2  14   3    2.30    1.50
  -2  14  -3    6.50    2.30
  -3 -14  -3   63.79    4.50
   3 -14   3   65.39    4.30
   3  14   3   61.19    4.60
   4 -14   3   53.99    3.70
  -4 -14  -3   54.19    4.10
   4  14   3   50.79    3.90
   4  14   3   46.00    3.20
   4  14   3   53.39    4.10
  -5 -14  -3   50.19    3.90
   5  14   3   33.80    2.70
   5  14   3   34.80    3.30
   5  14   3   47.60    3.70
  -6 -14  -3   13.50    2.80
   6  14   3   13.60    2.90
   6  14   3   10.00    1.60
   6  14   3   15.10    3.50
   6  14   3   11.00    1.90
   7 -14   3   -1.80    1.50
  -7 -14  -3    0.30    1.60
   7  14   3   -0.80    2.70
   7  14   3   -4.00    2.50
   7  14   3   -0.80    0.60
   7  14   3    0.40    1.10
   8 -14   3   94.39    6.70
  -8 -14  -3   98.59    6.60
   8  14   3   99.79    6.00
   8  14   3   97.29    5.40
   8  14   3  106.49    8.50
   8  14   3  102.69    6.70
  -9 -14  -3    3.80    3.40
   9 -14   3    4.40    2.30
   9  14   3    3.20    2.10
   9  14   3    3.90    3.10
   9  14   3    4.20    1.30
 -10 -14  -3   10.40    2.40
  10  14   3   13.10    3.70
  10  14   3   13.60    2.60
  10  14   3   11.10    1.60
  10  14   3   11.50    2.00
 -11 -14  -3    5.90    2.10
  11  14   3    6.20    1.40
  11  14   3    6.50    1.20
  11  14   3   13.60    3.70
  12 -14   3    4.50    2.50
 -12 -14  -3    2.70    2.00
 -12  14  -3    1.90    1.00
  12  14   3    1.80    0.60
  12  14   3    1.80    1.10
  12  14   3    3.80    2.40
  12  14   3    3.80    3.40
 -11 -15   3   10.00    2.80
  11  15  -3   15.00    2.20
 -11  15   3    4.50    2.30
 -10 -15   3   12.40    4.30
 -10 -15   3   18.20    3.90
  10 -15  -3   27.40    4.80
  10  15  -3   22.30    1.90
 -10  15   3   33.00    4.00
  10  15  -3   22.50    2.60
  -9 -15   3   22.20    4.70
   9 -15  -3   28.20    4.70
  -9 -15   3   26.90    4.10
   9  15  -3   33.50    3.00
  -9  15   3   35.00    4.00
   9  15  -3   27.90    2.30
  -8 -15   3    7.50    2.30
  -8 -15   3    7.00    3.10
   8 -15  -3    5.20    2.50
   8  15  -3    5.00    1.60
  -8  15   3    4.00    2.30
   8  15  -3    3.90    1.00
  -7 -15   3   -0.40    1.90
   7 -15  -3    2.80    2.10
  -7  15   3   -1.10    1.80
   7  15  -3    1.90    1.50
  -6 -15   3    0.80    2.20
   6  15  -3    1.70    1.60
  -6  15   3    1.30    1.80
  -5  15   3   13.60    2.70
   5  15  -3   17.40    2.80
  -4 -15   3   23.40    3.50
  -4  15   3   26.10    3.40
   4  15  -3   23.70    3.40
  -3 -15   3    2.10    1.80
  -3  15   3    3.10    2.00
   3  15  -3    0.40    1.90
  -2 -15   3    3.40    1.70
  -2  15   3    4.70    2.00
   2  15  -3    4.90    2.10
   1 -15  -3   10.60    2.00
  -1  15   3   10.50    2.10
   1  15  -3    5.20    2.20
   0 -15   3   97.69    6.80
   0 -15  -3  123.59    6.80
   0  15  -3   97.19    7.40
   0  15   3  130.29    7.40
   1 -15   3    5.40    1.60
  -1  15  -3    8.30    2.30
  -2 -15  -3   25.30    3.00
   2 -15   3   26.00    2.80
   2  15   3   24.80    3.00
  -2  15  -3   27.40    3.80
  -3 -15  -3   14.00    2.70
   3 -15   3   12.20    2.00
  -3  15  -3    9.60    2.50
   3  15   3   17.80    2.60
   4 -15   3   25.80    2.50
  -4 -15  -3   19.60    3.10
   4  15   3   22.90    2.10
   4  15   3   21.20    3.20
   4  15   3   25.80    2.80
  -4  15  -3   17.00    3.30
  -5 -15  -3    4.70    1.70
   5  15   3    3.00    0.90
   5  15   3    4.40    1.60
   5  15   3    3.00    1.70
  -6 -15  -3    5.20    2.00
   6  15   3    5.40    1.50
   6  15   3    5.40    1.00
   7  15   3    3.80    1.00
   7  15   3    4.00    1.30
  -8 -15  -3    0.50    1.80
   8  15   3    0.70    0.90
   8  15   3    0.10    1.90
   8  15   3    1.60    1.30
   8  15   3    0.20    2.80
   9 -15   3   -0.80    2.00
  -9 -15  -3    0.80    1.80
   9  15   3    0.10    1.20
   9  15   3   -0.10    0.70
   9  15   3    1.00    3.00
   9  15   3    0.10    1.80
  10 -15   3    7.00    2.40
 -10 -15  -3    9.50    2.30
  10  15   3   10.40    3.80
  10  15   3   10.70    2.50
  10  15   3   10.00    1.70
  10  15   3    9.80    1.40
 -11 -15  -3   18.10    3.60
  11 -15   3   19.80    4.20
  11  15   3   20.00    2.30
  11  15   3   19.10    1.70
  11  15   3   19.60    4.50
  11  15   3   17.30    3.80
 -10 -16   3    2.50    2.30
  10 -16  -3    1.00    2.30
  10  16  -3    1.90    1.40
  10  16  -3    0.30    0.70
 -10  16   3    1.20    2.10
  -9 -16   3    5.90    2.60
   9 -16  -3    6.30    2.70
   9  16  -3    8.10    1.80
  -9  16   3    6.90    2.30
   9  16  -3    8.10    1.60
  -8 -16   3   84.29    6.80
   8 -16  -3   96.19    7.30
   8  16  -3   88.69    5.20
  -8  16   3   94.59    6.80
   8  16  -3   98.39    6.10
  -7 -16   3   23.20    3.90
   7  16  -3   22.70    3.10
  -7  16   3   20.70    3.30
  -6 -16   3    2.70    2.10
   6  16  -3    2.40    1.80
  -6  16   3    3.70    2.00
  -5 -16   3    6.30    2.10
   5  16  -3    5.40    2.00
  -5  16   3    2.40    2.00
  -4 -16   3   62.99    4.90
  -4  16   3   48.50    4.70
   4  16  -3   48.20    4.60
  -3 -16   3    1.70    1.80
  -3  16   3    2.20    2.00
   3  16  -3    3.20    1.90
  -2 -16   3    3.90    2.80
  -2  16   3    3.80    1.90
   2  16  -3    4.50    2.10
  -1 -16   3   22.70    3.20
  -1  16   3   27.60    3.30
   0 -16  -3   55.19    4.40
   0 -16   3   41.80    4.00
   0  16  -3   38.70    4.60
   1 -16   3    8.00    1.90
  -1  16  -3    6.90    2.60
   1  16   3   13.50    2.50
   2  16   3    7.10    1.90
  -2  16  -3    3.30    2.10
  -3 -16  -3   20.60    3.70
   3  16   3   16.50    2.70
  -3  16  -3   13.00    3.00
  -4 -16  -3   33.70    3.60
   4  16   3   29.40    2.60
  -4  16  -3   30.50    4.10
   4  16   3   29.80    3.20
  -5 -16  -3   26.60    3.40
   5  16   3   21.90    2.20
   5  16   3   22.10    2.80
  -5  16  -3   23.80    3.90
  -6 -16  -3    1.20    1.70
   6  16   3    1.60    0.80
   6  16   3    1.30    1.30
   6  16   3    1.10    1.90
  -6  16  -3   -0.90    1.90
  -7 -16  -3    6.70    2.30
   7  16   3   11.50    2.00
  -7  16  -3   10.50    2.90
   7  16   3    6.20    2.20
   7  16   3   10.30    1.60
  -8 -16  -3   28.10    3.90
   8 -16   3   19.30    4.00
   8  16   3   29.20    2.30
   8  16   3   22.00    3.70
   8  16   3   29.90    2.90
  -8  16  -3   25.50    4.20
  -9 -16  -3   36.30    4.20
   9  16   3   28.00    3.00
   9  16   3   29.80    2.40
   9  16   3   34.40    4.00
 -10 -16  -3   28.00    3.90
  10 -16   3   18.30    4.10
  10  16   3   24.70    3.80
  10  16   3   23.40    2.60
  10  16   3   23.80    2.00
  -9 -17   3    7.90    2.70
   9  17  -3   11.30    2.10
  -9  17   3   11.10    2.80
   9  17  -3    9.80    1.70
  -8 -17   3   10.80    2.80
  -8  17   3   12.80    2.90
   8  17  -3    9.90    2.10
   8  17  -3   11.30    1.90
  -7 -17   3   53.69    5.30
  -7  17   3   57.99    5.20
   7  17  -3   54.89    4.60
  -6 -17   3   -1.00    2.10
   6  17  -3   -1.70    1.50
  -6  17   3   -2.20    1.90
  -5 -17   3    0.70    1.90
   5  17  -3   -0.90    1.60
  -5  17   3    0.60    1.70
  -4 -17   3   58.99    4.90
  -4  17   3   46.30    4.70
   4  17  -3   46.00    4.60
  -3 -17   3   29.50    3.90
  -3  17   3   32.40    3.90
   3  17  -3   31.40    4.00
  -2 -17   3    3.40    1.90
   2  17  -3    2.30    2.00
  -2  17   3    6.00    2.00
   1  17  -3    2.90    2.10
   0 -17  -3  154.28    8.50
   0 -17   3  139.89    8.50
   0  17   3  139.79    8.90
   0  17  -3  129.89    9.20
   1 -17   3   25.70    3.20
  -1 -17  -3   26.80    3.20
   2 -17   3    3.30    1.60
  -2 -17  -3    2.70    1.50
   2  17   3    2.40    1.80
  -2  17  -3    0.00    2.00
   3 -17   3    3.70    1.50
  -3 -17  -3    4.20    1.80
  -3  17  -3   -0.90    1.90
   3  17   3    4.80    1.60
  -4 -17  -3   -0.50    1.60
   4  17   3   -0.20    0.90
  -4  17  -3   -0.60    1.90
   4  17   3    1.00    1.30
  -5 -17  -3    1.50    1.70
   5  17   3    0.80    1.40
[truncated: 1,499,841 more chars]
